# Supplementary material
Source: publisher figshare collection journal article supplement (https://brill.figshare.com/articles/dataset/_/19361666)
Supplement: Supplementary file 1 [file 1]

Dataset Dongbeili–Shanxi

| Household number | Year | Name of the head of the household | Production team | Class status (1)         | Basic work points (2) | Total labor forces (3) | Male labor forces (4) | Female labor forces (5) | Total household population (6) | Age: 1 to 3 years old (7) | Age: 4 to 7 years old (8) | Age: 8 years old and above (9) | Work points of grain distribution (10) | Laboring work points (11) | Farmyard manure work points (12) | Total work points (13) | Work points of compulsory labor (14) | Work points of help cultivation (15) | Work points of private plots labor (16) | Total deducted work points (17) | Acutal workdays of participation in distribution (18) | Workpoints for rations distribution (19) | Rations per workpoint (20) | Total rations received form distribution (21) | Workdays of participation in distribu-tion (22) | Grains per workpoint (23) | Total grains distributed by work-points (24) | Grains subsidy (25) | Total Grains received from distribution (26) | Distributed grains per person (27) | Distributed grains per adult (28) | Grains received from privated plots (29) | Workdays of participation in distribution (30) | Value per workpoint (31) | Total value of workpoints (32) | Money used for investment (33) | Sum of income (34) | Money distributed in this year (34) | Deposit/ debt of this year (35) | Deposit/ debt over the years (36) | Accumulated deposit/debt (37) |
|------------------|------|-----------------------------------|-----------------|--------------------------|-----------------------|------------------------|-----------------------|-------------------------|--------------------------------|---------------------------|---------------------------|--------------------------------|----------------------------------------|---------------------------|----------------------------------|------------------------|--------------------------------------|--------------------------------------|-----------------------------------------|---------------------------------|-------------------------------------------------------|------------------------------------------|----------------------------|-----------------------------------------------|-------------------------------------------------|---------------------------|----------------------------------------------|---------------------|----------------------------------------------|------------------------------------|-----------------------------------|------------------------------------------|------------------------------------------------|--------------------------|--------------------------------|--------------------------------|--------------------|-------------------------------------|---------------------------------|-----------------------------------|-------------------------------|
| 1                | 1970 | Meng Tianyun                      | 1               | poor peasant             |                       |                        |                       |                         | 8                              |                           |                           |                                |                                        | 439.2                     | 127.5                            |                        | 566.7                                | 55.2                                 |                                         |                                 | 512                                                   | 7.7                                      | 314                        | 2408                                          | 512                                             | 0.53                      | 271                                          |                     | 2679                                         | 335                                |                                   | 511.5                                    | 0.68                                           | 347.82                   | 99                             | 446.82                         | 405.13             | 41.69                               | 16.39                           | 58.08                             |                               |
| 2                | 1970 | Yang Fengming                     | 1               | middle-class peasant     |                       |                        |                       |                         | 5                              |                           |                           |                                |                                        | 660.3                     | 80.6                             |                        | 740.9                                | 57.5                                 |                                         |                                 | 683                                                   | 5.0                                      | 314                        | 1570                                          | 683                                             | 0.53                      | 362                                          |                     | 1932                                         | 386                                |                                   | 683                                      | 0.68                                           | 464.44                   |                                | 464.44                         | 419.97             | 44.47                               | -72.31                          | -27.84                            |                               |
| 3                | 1970 | Li Chengxin                       | 1               | poor peasant             |                       |                        |                       |                         | 8                              |                           |                           |                                |                                        | 793.9                     | 127.7                            |                        | 921.6                                | 46.0                                 |                                         |                                 | 876                                                   | 8.0                                      | 314                        | 2512                                          | 876                                             | 0.53                      | 464                                          |                     | 2976                                         | 372                                |                                   | 875.6                                    | 0.68                                           | 595.41                   |                                | 595.41                         | 606.93             | -11.52                              | -414.37                         | -425.89                           |                               |
| 4                | 1970 | Li Zeying                         | 1               | poor peasant             |                       |                        |                       |                         | 2                              |                           |                           |                                |                                        | 198.1                     | 17.0                             |                        | 215.1                                | 11.5                                 |                                         |                                 | 204                                                   | 2.0                                      | 314                        | 628                                           | 204                                             | 0.53                      | 108                                          |                     | 736                                          | 368                                |                                   | 203.6                                    | 0.68                                           | 138.45                   |                                | 138.45                         | 136.87             | 1.58                                | 82.07                           | 83.65                             |                               |
| 5                | 1970 | Gao Peizhong                      | 1               | poor peasant             |                       |                        |                       |                         | 8                              |                           |                           |                                |                                        | 609.4                     | 102.4                            |                        | 711.8                                | 34.5                                 |                                         |                                 | 677                                                   | 7.8                                      | 314                        | 2460                                          | 677                                             | 0.53                      | 359                                          |                     | 2819                                         | 352                                |                                   | 677.3                                    | 0.68                                           | 460.56                   |                                | 460.56                         | 516.76             | -56.20                              | -246.65                         | -302.85                           |                               |
| 6                | 1970 | Kong Qingquan                     | 1               | poor peasant             |                       |                        |                       |                         | 6                              |                           |                           |                                |                                        | 651.9                     | 151.7                            |                        | 803.6                                | 34.5                                 |                                         |                                 | 769                                                   | 6.0                                      | 314                        | 1884                                          | 769                                             | 0.53                      | 408                                          |                     | 2292                                         | 382                                |                                   | 769.1                                    | 0.68                                           | 522.99                   |                                | 522.99                         | 544.24             | -21.25                              | 262.47                          | 241.22                            |                               |
| 7                | 1970 | Li Chengren                       | 1               | middle-class peasant     |                       |                        |                       |                         | 2                              |                           |                           |                                |                                        | 31.8                      | 91.4                             |                        | 123.2                                | 11.5                                 |                                         |                                 | 112                                                   | 2.0                                      | 314                        | 628                                           | 112                                             | 0.53                      | 59                                           |                     | 687                                          | 344                                |                                   | 111.7                                    | 0.68                                           | 75.96                    |                                | 75.96                          | 140.72             | -64.76                              | -10.63                          | -75.39                            |                               |
| 8                | 1970 | Wu Jixiang                        | 1               | middle-class peasant     |                       |                        |                       |                         | 5                              |                           |                           |                                |                                        | 222.1                     | 84.6                             |                        | 306.7                                | 6.9                                  |                                         |                                 | 300                                                   | 4.8                                      | 314                        | 1505                                          | 300                                             | 0.53                      | 159                                          |                     | 1664                                         | 333                                |                                   | 299.8                                    | 0.68                                           | 203.86                   | 97                             | 300.86                         | 246.92             | 53.94                               | -28.97                          | 24.97                             |                               |
| 9                | 1970 | Kong Fangyu                       | 1               | poor peasant             |                       |                        |                       |                         | 2                              |                           |                           |                                |                                        | 129.1                     |                                  |                        | 129.1                                |                                      |                                         |                                 | 129                                                   | 2.2                                      | 314                        | 706                                           | 129                                             | 0.53                      | 68                                           |                     | 774                                          | 387                                |                                   | 129.1                                    | 0.68                                           | 87.79                    |                                | 87.79                          | 181.18             | -93.39                              | 23.77                           | -69.62                            |                               |
| 10               | 1970 | Gao Wei                           | 1               | poor peasant             |                       |                        |                       |                         | 4                              |                           |                           |                                |                                        | 647.2                     | 91.1                             |                        | 738.3                                | 46.0                                 |                                         |                                 | 692                                                   | 4.0                                      | 314                        | 1256                                          | 692                                             | 0.53                      | 367                                          |                     | 1623                                         | 406                                |                                   | 692.3                                    | 0.68                                           | 470.76                   |                                | 470.76                         | 444.68             | 26.08                               | 241.64                          | 267.72                            |                               |
| 11               | 1970 | Gao Jun                           | 1               | poor peasant             |                       |                        |                       |                         | 1                              |                           |                           |                                |                                        | 127.5                     | 5.0                              |                        | 132.5                                | 6.9                                  |                                         |                                 | 126                                                   | 1.0                                      | 314                        | 314                                           | 126                                             | 0.53                      | 67                                           |                     | 381                                          | 381                                |                                   | 125.6                                    | 0.68                                           | 85.41                    |                                | 85.41                          | 100.86             | -15.45                              | 37.08                           | 21.63                             |                               |
| 12               | 1970 | Gao Peixiao                       | 1               | poor peasant             |                       |                        |                       |                         | 4                              |                           |                           |                                |                                        | 350.0                     | 92.0                             |                        | 442.0                                | 27.6                                 |                                         |                                 | 414                                                   | 4.0                                      | 314                        | 1256                                          | 414                                             | 0.53                      | 220                                          |                     | 1476                                         | 369                                |                                   | 414.4                                    | 0.68                                           | 281.79                   |                                | 281.79                         | 329.81             | -48.02                              | 59.89                           | 11.87                             |                               |
| 13               | 1970 | Gao Shang                         | 1               | poor peasant             |                       |                        |                       |                         | 3                              |                           |                           |                                |                                        | 363.3                     | 54.7                             |                        | 418.0                                | 16.1                                 |                                         |                                 | 402                                                   | 3.0                                      | 314                        | 942                                           | 402                                             | 0.53                      | 213                                          |                     | 1155                                         | 385                                |                                   | 401.9                                    | 0.68                                           | 273.29                   | 1                              | 274.29                         | 239.58             | 34.71                               | -181.29                         | -146.58                           |                               |
| 14               | 1970 | Mu Zhaolin                        | 1               | poor peasant             |                       |                        |                       |                         | 4                              |                           |                           |                                |                                        | 425.7                     | 87.8                             |                        | 513.5                                | 29.9                                 |                                         |                                 | 484                                                   | 4.0                                      | 314                        | 1256                                          | 484                                             | 0.53                      | 256                                          |                     | 1512                                         | 378                                |                                   | 483.6                                    | 0.68                                           | 328.85                   |                                | 328.85                         | 299.63             | 29.22                               | -16.27                          | 12.95                             |                               |
| 15               | 1970 | Cao Cuizhen                       | 1               | poor peasant             |                       |                        |                       |                         | 7                              |                           |                           |                                |                                        | 1095.7                    | 135.1                            |                        | 1230.8                               | 73.6                                 |                                         |                                 | 1157                                                  | 7.0                                      | 314                        | 2198                                          | 1157                                            | 0.53                      | 613                                          |                     | 2811                                         | 402                                |                                   | 1157.2                                   | 0.68                                           | 786.90                   |                                | 786.90                         | 753.74             | 33.16                               | 393.37                          | 426.53                            |                               |
| 16               | 1970 | Cao Jianren                       | 1               | poor peasant             |                       |                        |                       |                         | 5                              |                           |                           |                                |                                        | 381.3                     | 98.7                             |                        | 480.0                                | 27.6                                 |                                         |                                 | 452                                                   | 5.0                                      | 314                        | 1570                                          | 452                                             | 0.53                      | 240                                          |                     | 1810                                         | 362                                |                                   | 452.4                                    | 0.68                                           | 307.63                   |                                | 307.63                         | 400.32             | -92.69                              | 21.54                           | -71.15                            |                               |
| 17               | 1970 | Liu Guiwu                         | 1               | poor peasant             |                       |                        |                       |                         | 1                              |                           |                           |                                |                                        |                           |                                  | 0.0                    |                                      |                                      |                                         |                                 | 0                                                     | 1.0                                      | 314                        | 314                                           | 0                                               | 0.53                      | 0                                            |                     | 314                                          | 314                                |                                   | 0                                        | 0.68                                           | 0.00                     |                                | 0.00                           | 87.09              | -87.09                              | -703.56                         | -790.65                           |                               |
| 18               | 1970 | Meng Mingde                       | 1               | poor peasant             |                       |                        |                       |                         | 8                              |                           |                           |                                |                                        | 1035.0                    | 130.6                            |                        | 1165.6                               | 18.4                                 |                                         |                                 | 1147                                                  | 7.9                                      | 314                        | 2473                                          | 1147                                            | 0.53                      | 608                                          |                     | 3081                                         | 385                                |                                   | 1147.2                                   | 0.68                                           | 780.10                   |                                | 780.10                         | 744.89             | 35.21                               | 394.89                          | 430.10                            |                               |
| 19               | 1970 | Mu Shouliang                      | 1               | poor peasant             |                       |                        |                       |                         | 2                              |                           |                           |                                |                                        | 26.0                      | 27.3                             |                        | 53.3                                 |                                      |                                         |                                 | 53                                                    | 2.0                                      | 314                        | 628                                           | 53                                              | 0.53                      | 28                                           |                     | 656                                          | 328                                |                                   | 53.3                                     | 0.68                                           | 36.24                    |                                | 36.24                          | 152.98             | -116.74                             | 41.78                           | -74.96                            |                               |
| 20               | 1970 | Meng Mingbao                      | 1               | poor peasant             |                       |                        |                       |                         | 4                              |                           |                           |                                |                                        | 852.8                     | 160.2                            |                        | 1013.0                               | 59.8                                 |                                         |                                 | 953                                                   | 4.0                                      | 314                        | 1256                                          | 953                                             | 0.53                      | 505                                          |                     | 1761                                         | 440                                |                                   | 953.2                                    | 0.68                                           | 648.18                   |                                | 648.18                         | 480.26             | 167.92                              | 73.20                           | 241.12                            |                               |
| 21               | 1970 | Meng Mingjin                      | 2               | poor peasant             |                       |                        |                       |                         | 2                              |                           |                           |                                |                                        | 282.0                     | 48.5                             |                        | 330.5                                | 20.7                                 |                                         |                                 | 310                                                   | 2.0                                      | 314                        | 628                                           | 310                                             | 0.53                      | 164                                          |                     | 792                                          | 396                                |                                   | 309.8                                    | 0.68                                           | 210.66                   |                                | 210.66                         | 209.63             | 1.03                                | 32.13                           | 33.16                             |                               |
| 22               | 1970 | Liang Shiren                      | 1               | low-middle-class peasant |                       |                        |                       |                         | 2                              |                           |                           |                                |                                        | 6.6                       | 158.5                            |                        | 165.1                                |                                      |                                         |                                 | 165                                                   | 2.0                                      | 314                        | 628                                           | 165                                             | 0.53                      | 88                                           |                     | 716                                          | 358                                |                                   | 165.1                                    | 0.68                                           | 112.27                   |                                | 112.27                         | 148.95             | -36.68                              | -42.26                          | -78.94                            |                               |
| 23               | 1970 | Liang Yingfu                      | 1               | low-middle-class peasant |                       |                        |                       |                         | 4                              |                           |                           |                                |                                        | 346.8                     |                                  |                        | 346.8                                | 23.0                                 |                                         |                                 | 324                                                   | 4.0                                      | 314                        | 1256                                          | 324                                             | 0.53                      | 172                                          |                     | 1428                                         | 357                                |                                   | 323.8                                    | 0.68                                           | 220.18                   |                                | 220.18                         | 265.77             | -45.59                              | -223.99                         | -269.58                           |                               |

(cont.)

| APPENDIX D       |      |                                   |                 |                          |                       |                        |                       |                         |                                |                           |                           |                                |                                        |                           |                                  |                        |                                      |                                      |                                         |                                 |                                                       |                                          |                            |                                               |                                                 |                           |                                              |                     |                                              |                                    |                                   |                                          |                                                |                          |                                |                                |                    |                                     |                                 |                                   |                               |        |      |        |        |         |         |          |
|------------------|------|-----------------------------------|-----------------|--------------------------|-----------------------|------------------------|-----------------------|-------------------------|--------------------------------|---------------------------|---------------------------|--------------------------------|----------------------------------------|---------------------------|----------------------------------|------------------------|--------------------------------------|--------------------------------------|-----------------------------------------|---------------------------------|-------------------------------------------------------|------------------------------------------|----------------------------|-----------------------------------------------|-------------------------------------------------|---------------------------|----------------------------------------------|---------------------|----------------------------------------------|------------------------------------|-----------------------------------|------------------------------------------|------------------------------------------------|--------------------------|--------------------------------|--------------------------------|--------------------|-------------------------------------|---------------------------------|-----------------------------------|-------------------------------|--------|------|--------|--------|---------|---------|----------|
| Household number | Year | Name of the head of the household | Production team | Class status (1)         | Basic work points (2) | Total labor forces (3) | Male labor forces (4) | Female labor forces (5) | Total household population (6) | Age: 1 to 3 years old (7) | Age: 4 to 7 years old (8) | Age: 8 years old and above (9) | Work points of grain distribution (10) | Laboring work points (11) | Farmyard manure work points (12) | Total work points (13) | Work points of compulsory labor (14) | Work points of help cultivation (15) | Work points of private plots labor (16) | Total deducted work points (17) | Acutal workdays of participation in distribution (18) | Workpoints for rations distribution (19) | Rations per workpoint (20) | Total rations received form distribution (21) | Workdays of participation in distribu-tion (22) | Grains per workpoint (23) | Total grains distributed by work-points (24) | Grains subsidy (25) | Total Grains received from distribution (26) | Distributed grains per person (27) | Distributed grains per adult (28) | Grains received from privated plots (29) | Workdays of participation in distribution (30) | Value per workpoint (31) | Total value of workpoints (32) | Money used for investment (33) | Sum of income (34) | Money distributed in this year (34) | Deposit/ debt of this year (35) | Deposit/ debt over the years (36) | Accumulated deposit/debt (37) |        |      |        |        |         |         |          |
| 24               | 1970 | Lei Guangzhi                      | 1               | low-middle-class peasant |                       |                        |                       |                         | 3                              |                           |                           |                                |                                        |                           |                                  |                        |                                      |                                      |                                         |                                 | 326.7                                                 | 77.2                                     |                            | 403.9                                         | 27.6                                            |                           | 376                                          | 3.0                 | 314                                          | 942                                | 376                               | 0.53                                     | 199                                            |                          | 1141                           |                                | 380                |                                     |                                 | 376.3                             | 0.68                          | 255.88 |      | 255.88 | 239.27 | 16.61   | -550.35 | -533.74  |
| 25               | 1970 | Fan Lishi                         | 1               | middle-class peasant     |                       |                        |                       |                         | 7                              |                           |                           |                                |                                        |                           |                                  |                        |                                      |                                      |                                         |                                 | 827.4                                                 | 279.3                                    |                            | 1106.7                                        | 50.6                                            |                           | 1056                                         | 7.0                 | 314                                          | 2198                               | 1056                              | 0.53                                     | 560                                            |                          | 2758                           |                                | 394                |                                     |                                 | 1056.1                            | 0.68                          | 718.15 |      | 718.15 | 647.00 | 71.15   | 123.02  | 194.17   |
| 26               | 1970 | Zhang Quangui                     | 1               | middle-class peasant     |                       |                        |                       |                         | 1                              |                           |                           |                                |                                        |                           |                                  |                        |                                      |                                      |                                         |                                 | 28.0                                                  | 5.0                                      |                            | 33.0                                          | 33.0                                            |                           | 0                                            | 1.0                 | 314                                          | 314                                | 0                                 | 0.53                                     | 0                                              |                          | 314                            |                                | 314                |                                     |                                 | 33                                | 0.68                          | 22.44  |      | 22.44  | 73.18  | -50.74  | -187.72 | -238.46  |
| 27               | 1970 | Wang Bangjie                      | 1               | low-middle-class peasant |                       |                        |                       |                         | 3                              |                           |                           |                                |                                        |                           |                                  |                        |                                      |                                      |                                         |                                 | 478.5                                                 | 57.1                                     |                            | 535.6                                         | 32.2                                            |                           | 503                                          | 3.0                 | 314                                          | 942                                | 503                               | 0.53                                     | 267                                            |                          | 1209                           |                                | 403                |                                     |                                 | 503.4                             | 0.68                          | 342.31 |      | 342.31 | 285.01 | 57.30   | -131.34 | -74.04   |
| 28               | 1970 | Meng Tianxing                     | 1               | low-middle-class peasant |                       |                        |                       |                         | 5                              |                           |                           |                                |                                        |                           |                                  |                        |                                      |                                      |                                         |                                 | 359.0                                                 | 79.7                                     |                            | 438.7                                         | 27.6                                            |                           | 411                                          | 5.0                 | 314                                          | 1570                               | 411                               | 0.53                                     | 218                                            |                          | 1788                           |                                | 358                |                                     |                                 | 411.1                             | 0.68                          | 279.55 |      | 279.55 | 349.33 | -69.78  | -28.85  | -98.63   |
| 29               | 1970 | Xue Baolin                        | 1               | low-middle-class peasant |                       |                        |                       |                         | 5                              |                           |                           |                                |                                        |                           |                                  |                        |                                      |                                      |                                         |                                 |                                                       |                                          |                            | 33.8                                          | 4.6                                             |                           | 29                                           | 4.9                 | 314                                          | 1544                               | 29                                | 0.53                                     | 15                                             |                          | 1559                           |                                | 312                |                                     |                                 | 29.2                              | 0.68                          | 19.86  | 260  | 279.72 | 229.35 | 50.37   | -28.22  | 22.15    |
| 30               | 1970 | Cao Cuiheng                       | 1               | low-middle-class peasant |                       |                        |                       |                         | 4                              |                           |                           |                                |                                        |                           |                                  |                        |                                      |                                      |                                         |                                 | 244.4                                                 | 120.1                                    |                            | 364.5                                         | 23.0                                            |                           | 342                                          | 3.8                 | 314                                          | 1178                               | 342                               | 0.53                                     | 181                                            |                          | 1359                           |                                | 340                |                                     |                                 | 341.5                             | 0.68                          | 232.22 | 2    | 234.22 | 267.64 | -33.42  | 128.72  | 95.30    |
| 31               | 1970 | Ma Hongxiang                      | 1               | low-middle-class peasant |                       |                        |                       |                         |                                |                           |                           |                                |                                        |                           |                                  |                        |                                      |                                      |                                         |                                 |                                                       |                                          |                            | 0.0                                           |                                                 |                           | 0                                            | 0.0                 | 314                                          |                                    | 0                                 | 0.53                                     | 0                                              |                          | 0                              |                                | #DIV/o!            |                                     | 0                               | 0.68                              | 0.00                          |        | 0.00 |        | 0.00   |         | 0.00    |          |
| 32               | 1970 | Ruan Baorong                      | 1               | low-middle-class peasant |                       |                        |                       |                         | 6                              |                           |                           |                                |                                        |                           |                                  |                        |                                      |                                      |                                         |                                 | 1047.6                                                | 185.3                                    |                            | 1232.9                                        | 57.5                                            |                           | 1175                                         | 6.0                 | 314                                          | 1884                               | 1175                              | 0.53                                     | 623                                            |                          | 2507                           |                                | 418                |                                     |                                 | 1175.4                            | 0.68                          | 799.27 |      | 799.27 | 578.18 | 221.09  | 107.17  | 328.26   |
| 33               | 1970 | Cao Qiguo                         | 1               | low-middle-class peasant |                       |                        |                       |                         | 6                              |                           |                           |                                |                                        |                           |                                  |                        |                                      |                                      |                                         |                                 | 403.2                                                 | 77.1                                     |                            | 480.3                                         | 27.6                                            |                           | 453                                          | 6.0                 | 314                                          | 1884                               | 453                               | 0.53                                     | 240                                            |                          | 2124                           |                                | 354                |                                     |                                 | 452.7                             | 0.68                          | 307.84 |      | 307.84 | 382.37 | -74.53  | 28.57   | -45.96   |
| 34               | 1970 | Liu Jinliang                      | 1               | poor peasant             |                       |                        |                       |                         | 6                              |                           |                           |                                |                                        |                           |                                  |                        |                                      |                                      |                                         |                                 | 753.9                                                 | 88.2                                     |                            | 842.1                                         | 23.0                                            |                           | 819                                          | 6.0                 | 314                                          | 1884                               | 819                               | 0.53                                     | 434                                            |                          | 2318                           |                                | 386                |                                     |                                 | 819.1                             | 0.68                          | 556.99 |      | 556.99 | 562.12 | -5.13   | 273.96  | 268.83   |
| 35               | 1970 | Shi Baoshou                       | 1               | low-middle-class peasant |                       |                        |                       |                         | 7                              |                           |                           |                                |                                        |                           |                                  |                        |                                      |                                      |                                         |                                 | 529.5                                                 | 131.0                                    |                            | 660.5                                         | 36.8                                            |                           | 624                                          | 7.0                 | 314                                          | 2198                               | 624                               | 0.53                                     | 331                                            |                          | 2529                           |                                | 361                |                                     |                                 | 623.7                             | 0.68                          | 424.12 |      | 424.12 | 524.59 | -100.47 | -945.69 | -1046.16 |
| 36               | 1970 | Wang Qiding                       | 2               | low-middle-class peasant |                       |                        |                       |                         | 2                              |                           |                           |                                |                                        |                           |                                  |                        |                                      |                                      |                                         |                                 | 266.5                                                 | 32.6                                     |                            | 299.1                                         | 18.4                                            |                           | 281                                          | 2.0                 | 314                                          | 628                                | 281                               | 0.53                                     | 149                                            |                          | 777                            |                                | 388                |                                     |                                 | 280.7                             | 0.68                          | 190.88 | 21   | 211.88 | 118.92 | 92.96   | 2.95    | 95.91    |
| 37               | 1970 | Yu Zhankui                        | 1               | poor peasant             |                       |                        |                       |                         | 5                              |                           |                           |                                |                                        |                           |                                  |                        |                                      |                                      |                                         |                                 | 111.1                                                 | 74.0                                     |                            | 185.1                                         | 27.6                                            |                           | 158                                          | 4.8                 | 314                                          | 1492                               | 158                               | 0.53                                     | 83                                             |                          | 1575                           |                                | 315                |                                     |                                 | 157.5                             | 0.68                          | 107.10 | 122  | 229.10 | 239.00 | -9.90   | -179.89 | -189.79  |
| 38               | 1970 | Liu Yucan                         | 1               | poor peasant             |                       |                        |                       |                         | 5                              |                           |                           |                                |                                        |                           |                                  |                        |                                      |                                      |                                         |                                 | 335.0                                                 | 116.5                                    |                            | 451.5                                         | 4.6                                             |                           | 447                                          | 5.0                 | 314                                          | 1570                               | 447                               | 0.53                                     | 237                                            |                          | 1807                           |                                | 361                |                                     |                                 | 446.9                             | 0.68                          | 303.89 |      | 303.89 | 405.18 | -101.29 | -53.89  | -155.18  |
| 39               | 1970 | Liu Guiting                       | 1               | middle-class peasant     |                       |                        |                       |                         | 3                              |                           |                           |                                |                                        |                           |                                  |                        |                                      |                                      |                                         |                                 | 433.4                                                 | 107.0                                    |                            | 540.4                                         | 23.0                                            |                           | 517                                          | 3.0                 | 314                                          | 942                                | 517                               | 0.53                                     | 274                                            |                          | 1216                           |                                | 405                |                                     |                                 | 517.4                             | 0.68                          | 351.83 |      | 351.83 | 361.99 | -10.16  | 114.36  | 104.20   |
| 40               | 1970 | Liu Chengze                       | 1               | middle-class peasant     |                       |                        |                       |                         | 1                              |                           |                           |                                |                                        |                           |                                  |                        |                                      |                                      |                                         |                                 | 63.8                                                  | 12.0                                     |                            | 75.8                                          | 11.5                                            |                           | 64                                           | 1.0                 | 314                                          | 314                                | 64                                | 0.53                                     | 34                                             |                          | 348                            |                                | 348                |                                     |                                 | 64.3                              | 0.68                          | 43.72  |      | 43.72  | 132.36 | -88.64  | 89.37   | 0.73     |

(cont.)

| Household number | Year | Name of the head of the household | Production team | Class status (1)           | Basic work points (2) | Total labor forces (3) | Male labor forces (4) | Female labor forces (5) | Total household population (6) | Age: 1 to 3 years old (7) | Age: 4 to 7 years old (8) | Age: 8 years old and above (9) | Work points of grain distribution (10) | Laboring work points (11) | Farmyard manure work points (12) | Total work points (13) | Work points of compulsory labor (14) | Work points of help cultivation (15) | Work points of private plots labor (16) | Total deducted work points (17) | Acutal workdays of participation in distribution (18) | Workpoints for rations distribution (19) | Rations per workpoint (20) | Total rations received form distribution (21) | Workdays of participation in distribu-tion (22) | Grains per workpoint (23) | Total grains distributed by work-points (24) | Grains subsidy (25) | Total Grains received from distribution (26) | Distributed grains per person (27) | Distributed grains per adult (28) | Grains received from privated plots (29) | Workdays of participation in distribution (30) | Value per workpoint (31) | Total value of workpoints (32) | Money used for investment (33) | Sum of income (34) | Money distributed in this year (34) | Deposit/ debt of this year (35) | Deposit/ debt over the years (36) | Accumulated deposit/debt (37) |
|------------------|------|-----------------------------------|-----------------|----------------------------|-----------------------|------------------------|-----------------------|-------------------------|--------------------------------|---------------------------|---------------------------|--------------------------------|----------------------------------------|---------------------------|----------------------------------|------------------------|--------------------------------------|--------------------------------------|-----------------------------------------|---------------------------------|-------------------------------------------------------|------------------------------------------|----------------------------|-----------------------------------------------|-------------------------------------------------|---------------------------|----------------------------------------------|---------------------|----------------------------------------------|------------------------------------|-----------------------------------|------------------------------------------|------------------------------------------------|--------------------------|--------------------------------|--------------------------------|--------------------|-------------------------------------|---------------------------------|-----------------------------------|-------------------------------|
| 41               | 1970 | Li Jinhu                          | 1               | middle-class peasant       |                       |                        |                       |                         | 3                              |                           |                           |                                |                                        |                           | 493.4                            | 91.6                   | 585.0                                | 25.3                                 |                                         |                                 | 560                                                   | 3.0                                      | 314                        | 942                                           | 560                                             | 0.53                      | 297                                          |                     | 1239                                         | 413                                |                                   |                                          | 559.7                                          | 0.68                     | 380.60                         |                                | 380.60             | 303.77                              | 76.83                           | 95.20                             | 172.03                        |
| 42               | 1970 | Meng Xiqing                       | 1               | poor peasant               |                       |                        |                       |                         | 6                              |                           |                           |                                |                                        |                           | 498.8                            | 129.4                  | 628.2                                | 27.6                                 |                                         |                                 | 601                                                   | 6.0                                      | 314                        | 1884                                          | 601                                             | 0.53                      | 318                                          |                     | 2202                                         | 367                                |                                   |                                          | 600.6                                          | 0.68                     | 408.41                         |                                | 408.41             | 459.12                              | -50.71                          | -96.66                            | -147.37                       |
| 43               | 1970 | Li Shucheng                       | 1               | poor peasant               |                       |                        |                       |                         | 7                              |                           |                           |                                |                                        |                           | 758.9                            | 258.4                  | 1017.3                               | 48.3                                 |                                         |                                 | 969                                                   | 7.0                                      | 314                        | 2198                                          | 969                                             | 0.53                      | 514                                          |                     | 2712                                         | 387                                |                                   |                                          | 969                                            | 0.68                     | 658.92                         |                                | 658.92             | 571.32                              | 87.60                           | 0.73                              | 88.33                         |
| 44               | 1970 | Wang Guiying                      | 1               | low-middle-class peasant   |                       |                        |                       |                         | 2                              |                           |                           |                                |                                        |                           | 333.0                            | 63.6                   | 396.6                                | 27.6                                 |                                         |                                 | 369                                                   | 2.0                                      | 314                        | 628                                           | 369                                             | 0.53                      | 196                                          |                     | 824                                          | 412                                |                                   |                                          | 369                                            | 0.68                     | 250.92                         |                                | 250.92             | 243.50                              | 7.42                            | 53.24                             | 60.66                         |
| 45               | 1970 | Zuo Yunxian                       | 1               | upper-middle-class peasant |                       |                        |                       |                         | 8                              |                           |                           |                                |                                        |                           | 1169.6                           | 173.3                  | 1342.9                               | 66.7                                 |                                         |                                 | 1276                                                  | 8.0                                      | 314                        | 2512                                          | 1276                                            | 0.53                      | 676                                          |                     | 3188                                         | 399                                |                                   |                                          | 1276.2                                         | 0.68                     | 867.82                         |                                | 867.82             | 725.73                              | 142.09                          | 196.21                            | 338.30                        |
| 46               | 1970 | Gao Peijie                        | 1               | poor peasant               |                       |                        |                       |                         | 2                              |                           |                           |                                |                                        |                           | 306.6                            | 5.3                    | 311.9                                |                                      |                                         |                                 | 312                                                   | 2.0                                      | 314                        | 628                                           | 312                                             | 0.53                      | 165                                          |                     | 793                                          | 397                                |                                   |                                          | 311.9                                          | 0.68                     | 212.09                         |                                | 212.09             | 167.00                              | 45.09                           | -21.42                            | 23.67                         |
| 47               | 1970 | Wang Qisheng                      | 1               | poor peasant               |                       |                        |                       |                         | 7                              |                           |                           |                                |                                        |                           | 569.2                            | 70.6                   | 639.8                                | 50.6                                 |                                         |                                 | 589                                                   | 7.0                                      | 314                        | 2198                                          | 589                                             | 0.53                      | 312                                          |                     | 2510                                         | 359                                |                                   |                                          | 589.2                                          | 0.68                     | 400.66                         |                                | 400.66             | 461.81                              | -61.15                          | -377.66                           | -438.81                       |
| 48               | 1970 | Chen Yuzhong                      | 2               | poor peasant               |                       |                        |                       |                         | 6                              |                           |                           |                                |                                        |                           | 439.0                            | 108.7                  | 547.7                                | 34.5                                 |                                         |                                 | 513                                                   | 6.0                                      | 314                        | 1884                                          | 513                                             | 0.53                      | 272                                          |                     | 2156                                         | 359                                |                                   |                                          | 513.2                                          | 0.68                     | 348.98                         |                                | 348.98             | 399.99                              | -51.01                          | -403.21                           | -454.22                       |
| 49               | 1970 | Meng Tianchang                    | 2               | poor peasant               |                       |                        |                       |                         | 4                              |                           |                           |                                |                                        |                           | 436.4                            | 56.0                   | 492.4                                | 27.6                                 |                                         |                                 | 465                                                   | 4.0                                      | 314                        | 1256                                          | 465                                             | 0.53                      | 246                                          |                     | 1502                                         | 376                                |                                   |                                          | 464.8                                          | 0.68                     | 316.06                         |                                | 316.06             | 321.35                              | -5.29                           | -54.19                            | -59.48                        |
| 50               | 1970 | Wang Xizhi                        | 2               | middle-class peasant       |                       |                        |                       |                         | 6                              |                           |                           |                                |                                        |                           | 617.6                            | 143.0                  | 760.6                                | 34.5                                 |                                         |                                 | 726                                                   | 6.0                                      | 314                        | 1884                                          | 726                                             | 0.53                      | 385                                          |                     | 2269                                         | 378                                |                                   |                                          | 726.1                                          | 0.68                     | 493.75                         |                                | 493.75             | 435.84                              | 57.91                           | -222.02                           | -164.11                       |
| 51               | 1970 | Jia Jinkui                        | 2               | low-middle-class peasant   |                       |                        |                       |                         | 2                              |                           |                           |                                |                                        |                           |                                  |                        | 0.0                                  |                                      |                                         |                                 | 0                                                     | 2.0                                      | 314                        | 628                                           | 0                                               | 0.53                      | 0                                            |                     | 628                                          | 314                                |                                   |                                          | 0                                              | 0.68                     | 0.00                           |                                | 0.00               | 138.99                              | -138.99                         | -493.62                           | -632.61                       |
| 52               | 1970 | Ji Yunxian                        | 2               | poor peasant               |                       |                        |                       |                         | 1                              |                           |                           |                                |                                        |                           | 207.4                            |                        | 207.4                                | 23.0                                 |                                         |                                 | 184                                                   | 1.0                                      | 314                        | 314                                           | 184                                             | 0.53                      | 98                                           |                     | 412                                          | 412                                |                                   |                                          | 184.4                                          | 0.68                     | 125.39                         |                                | 125.39             | 130.95                              | -5.56                           | -139.63                           | -145.19                       |
| 53               | 1970 | Zhang Yumei                       | 1               | poor peasant               |                       |                        |                       |                         | 4                              |                           |                           |                                |                                        |                           | 153.2                            | 94.1                   | 247.3                                | 36.8                                 |                                         |                                 | 211                                                   | 4.0                                      | 314                        | 1256                                          | 211                                             | 0.53                      | 112                                          |                     | 1368                                         | 342                                |                                   |                                          | 210.5                                          | 0.68                     | 143.14                         | 90                             | 233.14             | 216.87                              | 16.27                           | -76.87                            | -60.60                        |
| 54               | 1970 | Wang Jishi                        | 1               | middle-class peasant       |                       |                        |                       |                         | 4                              |                           |                           |                                |                                        |                           | 952.5                            | 110.5                  | 1063.0                               | 62.1                                 |                                         |                                 | 1001                                                  | 4.0                                      | 314                        | 1256                                          | 1001                                            | 0.53                      | 530                                          |                     | 1786                                         | 447                                |                                   |                                          | 1000.9                                         | 0.68                     | 680.61                         |                                | 680.61             | 529.87                              | 150.74                          | 391.63                            | 542.37                        |
| 55               | 1970 | Mu Zhaosheng                      | 2               | middle-class peasant       |                       |                        |                       |                         | 5                              |                           |                           |                                |                                        |                           | 442.0                            | 71.2                   | 513.2                                | 27.6                                 |                                         |                                 | 486                                                   | 5.0                                      | 314                        | 1570                                          | 486                                             | 0.53                      | 257                                          |                     | 1827                                         | 365                                |                                   |                                          | 485.6                                          | 0.68                     | 330.21                         |                                | 330.21             | 341.90                              | -11.69                          | 38.16                             | 26.47                         |
| 56               | 1970 | Li Cuilan                         | 2               | middle-class peasant       |                       |                        |                       |                         | 3                              |                           |                           |                                |                                        |                           | 32.8                             | 26.5                   | 59.3                                 | 6.9                                  |                                         |                                 | 52                                                    | 3.0                                      | 314                        | 942                                           | 52                                              | 0.53                      | 28                                           |                     | 970                                          | 323                                |                                   |                                          | 52.4                                           | 0.68                     | 35.63                          | 95                             | 130.63             | 148.88                              | -18.25                          | -32.58                            | -50.83                        |
| 57               | 1970 | Ma Shanming                       | 2               | middle-class peasant       |                       |                        |                       |                         | 6                              |                           |                           |                                |                                        |                           | 469.9                            | 67.6                   | 537.5                                | 29.9                                 |                                         |                                 | 508                                                   | 6.0                                      | 314                        | 1884                                          | 508                                             | 0.53                      | 269                                          |                     | 2153                                         | 359                                |                                   |                                          | 507.6                                          | 0.68                     | 345.17                         |                                | 345.17             | 411.77                              | -66.60                          | -683.81                           | -750.41                       |
| 58               | 1970 | Liang Xiulan                      | 2               | middle-class peasant       |                       |                        |                       |                         | 4                              |                           |                           |                                |                                        |                           | 357.2                            | 100.2                  | 457.4                                | 25.3                                 |                                         |                                 | 432                                                   | 4.0                                      | 314                        | 1256                                          | 432                                             | 0.53                      | 229                                          |                     | 1485                                         | 371                                |                                   |                                          | 432.1                                          | 0.68                     | 293.83                         | 43                             | 336.83             | 230.41                              | 106.42                          | -175.75                           | -69.33                        |
| 59               | 1970 | Cui Yongchang                     | 1               | poor peasant               |                       |                        |                       |                         | 5                              |                           |                           |                                |                                        |                           | 375.2                            | 126.2                  | 501.4                                | 23.0                                 |                                         |                                 | 478                                                   | 5.0                                      | 314                        | 1570                                          | 478                                             | 0.53                      | 254                                          |                     | 1824                                         | 365                                |                                   |                                          | 478.4                                          | 0.68                     | 325.31                         |                                | 325.31             | 340.44                              | -15.13                          | -229.53                           | -244.66                       |
| 60               | 1970 | Zhang Hengshou                    | 1               | low-middle-class peasant   |                       |                        |                       |                         | 6                              |                           |                           |                                |                                        |                           | 541.1                            | 169.3                  | 710.4                                | 11.5                                 |                                         |                                 | 699                                                   | 6.0                                      | 314                        | 1884                                          | 699                                             | 0.53                      | 370                                          |                     | 2254                                         | 376                                |                                   |                                          | 698.9                                          | 0.68                     | 475.25                         |                                | 475.25             | 411.21                              | 64.04                           | -279.93                           | -215.89                       |
| 61               | 1970 | Zhao Yingtong                     | 1               | poor peasant               |                       |                        |                       |                         | 4                              |                           |                           |                                |                                        |                           | 656.9                            | 88.8                   | 745.7                                | 43.7                                 |                                         |                                 | 702                                                   | 4.0                                      | 314                        | 1256                                          | 702                                             | 0.53                      | 372                                          |                     | 1628                                         | 407                                |                                   |                                          | 702                                            | 0.68                     | 477.36                         |                                | 477.36             | 373.84                              | 103.52                          | -28.53                            | 74.99                         |

(cont.)

| Household number | Year | Name of the head of the household | Production team | Class status (1)         | Basic work points (2) | Total labor forces (3) | Male labor forces (4) | Female labor forces (5) | Total household population (6) | Age: 1 to 3 years old (7) | Age: 4 to 7 years old (8) | Age: 8 years old and above (9) | Work points of grain distribution (10) | Laboring work points (11) | Farmyard manure work points (12) | Total work points (13) | Work points of compulsory labor (14) | Work points of help cultivation (15) | Work points of private plots labor (16) | Total deducted work points (17) | Acutal workdays of participation in distribution (18) | Workpoints for rations distribution (19) | Rations per workpoint (20) | Total rations received form distribution (21) | Workdays of participation in distribu- tion (22) | Grains per workpoint (23) | Total grains distributed by work- points (24) | Grains subsidy (25) | Total Grains received from distribution (26) | Distributed grains per person (27) | Distributed grains per adult (28) | Grains received from privated plots (29) | Workdays of participation in distribution (30) | Value per workpoint (31) | Total value of workpoints (32) | Money used for investment (33) | Sum of income (34) | Money distributed in this year (34) | Deposit/ debt of this year (35) | Deposit/ debt over the years (36) | Accumulated deposit/debt (37) |         |         |
|------------------|------|-----------------------------------|-----------------|--------------------------|-----------------------|------------------------|-----------------------|-------------------------|--------------------------------|---------------------------|---------------------------|--------------------------------|----------------------------------------|---------------------------|----------------------------------|------------------------|--------------------------------------|--------------------------------------|-----------------------------------------|---------------------------------|-------------------------------------------------------|------------------------------------------|----------------------------|-----------------------------------------------|--------------------------------------------------|---------------------------|-----------------------------------------------|---------------------|----------------------------------------------|------------------------------------|-----------------------------------|------------------------------------------|------------------------------------------------|--------------------------|--------------------------------|--------------------------------|--------------------|-------------------------------------|---------------------------------|-----------------------------------|-------------------------------|---------|---------|
| 62               | 1970 | Wu Xinggui                        | 1               | poor peasant             |                       |                        |                       |                         | 3                              |                           |                           |                                |                                        | 458.0                     | 46.5                             | 504.5                  | 27.6                                 |                                      |                                         |                                 |                                                       | 477                                      | 0.0                        | 314                                           |                                                  | 477                       | 0.53                                          | 253                 |                                              | 253                                | 84                                |                                          |                                                | 476.9                    | 0.68                           | 324.29                         |                    | 324.29                              | 311.93                          | 12.36                             | -120.94                       | -108.58 |         |
| 63               | 1970 | Wang Youfeng                      | 1               | poor peasant             |                       |                        |                       |                         | 3                              |                           |                           |                                |                                        | 150.5                     | 31.8                             | 182.3                  | 6.9                                  |                                      |                                         |                                 |                                                       | 175                                      | 3.0                        | 314                                           |                                                  | 175                       | 0.53                                          | 93                  |                                              | 1035                               |                                   | 345                                      |                                                | 175.4                    | 0.68                           | 119.27                         |                    | 119.27                              | 207.95                          | -88.68                            | -120.94                       | -88.68  |         |
| 64               | 1970 | Wang Qingsheng                    | 1               | poor peasant             |                       |                        |                       |                         | 2                              |                           |                           |                                |                                        | 330.8                     | 17.4                             | 348.2                  |                                      |                                      |                                         |                                 |                                                       | 348                                      | 2.0                        | 314                                           |                                                  | 348                       | 0.53                                          | 185                 |                                              | 813                                |                                   | 406                                      |                                                | 348.2                    | 0.68                           | 236.78                         |                    | 236.78                              | 226.38                          | 10.40                             | 196.48                        | 206.88  |         |
| 65               | 1970 | Li Yulin                          | 1               | middle-class peasant     |                       |                        |                       |                         | 3                              |                           |                           |                                |                                        | 566.6                     | 45.0                             | 611.6                  | 23.0                                 |                                      |                                         |                                 |                                                       | 589                                      | 3.0                        | 314                                           |                                                  | 589                       | 0.53                                          | 312                 |                                              | 1254                               |                                   | 418                                      |                                                | 588.6                    | 0.68                           | 400.25                         |                    | 400.25                              | 349.38                          | 50.87                             | 224.84                        | 275.71  |         |
| 66               | 1970 | Zuo Chunlan                       | 1               | middle-class peasant     |                       |                        |                       |                         | 6                              |                           |                           |                                |                                        | 0.4                       | 60.0                             | 60.4                   | 4.6                                  |                                      |                                         |                                 |                                                       | 56                                       | 6.0                        | 314                                           |                                                  | 1884                      | 56                                            | 0.53                | 30                                           |                                    | 1914                              |                                          | 319                                            |                          | 55.8                           | 0.68                           | 37.94              | 218.6                               | 256.54                          | 284.91                            | -28.37                        | -230.98 | -259.35 |
| 67               | 1970 | Gao Chongji                       | 1               | poor peasant             |                       |                        |                       |                         | 9                              |                           |                           |                                |                                        | 1378.6                    | 186.5                            | 1565.1                 | 55.2                                 |                                      |                                         |                                 |                                                       | 1510                                     | 9.0                        | 314                                           |                                                  | 1510                      | 0.53                                          | 800                 |                                              | 3626                               |                                   | 403                                      |                                                | 1509.9                   | 0.68                           | 1026.73                        |                    | 1026.73                             | 881.82                          | 144.91                            | 334.15                        | 479.06  |         |
| 68               | 1970 | Gao Chongwen                      | 1               | poor peasant             |                       |                        |                       |                         | 8                              |                           |                           |                                |                                        | 554.0                     | 149.2                            | 703.2                  | 48.3                                 |                                      |                                         |                                 |                                                       | 655                                      | 8.0                        | 314                                           |                                                  | 655                       | 0.53                                          | 347                 |                                              | 2859                               |                                   | 357                                      |                                                | 654.9                    | 0.68                           | 445.33                         |                    | 445.33                              | 519.98                          | -74.65                            | -809.95                       | -884.60 |         |
| 69               | 1970 | Gao Peiren                        | 1               | poor peasant             |                       |                        |                       |                         | 9                              |                           |                           |                                |                                        | 808.6                     | 188.9                            | 997.5                  | 48.3                                 |                                      |                                         |                                 |                                                       | 949                                      | 9.0                        | 314                                           |                                                  | 949                       | 0.53                                          | 503                 |                                              | 3329                               |                                   | 370                                      |                                                | 949.2                    | 0.68                           | 645.46                         |                    | 645.46                              | 530.48                          | 114.98                            | -459.07                       | -344.09 |         |
| 70               | 1970 | Wang Jingyi                       | 1               | low-middle-class peasant |                       |                        |                       |                         | 4                              |                           |                           |                                |                                        | 775.7                     | 120.7                            | 896.4                  | 43.7                                 |                                      |                                         |                                 |                                                       | 853                                      | 4.0                        | 314                                           |                                                  | 853                       | 0.53                                          | 452                 |                                              | 1708                               |                                   | 427                                      |                                                | 852.7                    | 0.68                           | 579.84                         |                    | 579.84                              | 470.76                          | 109.08                            | 305.35                        | 414.43  |         |
| 71               | 1970 | Wang Shutang                      | 1               | low-middle-class peasant |                       |                        |                       |                         | 4                              |                           |                           |                                |                                        | 443.9                     | 41.0                             | 484.9                  | 27.5                                 |                                      |                                         |                                 |                                                       | 457                                      | 4.0                        | 314                                           |                                                  | 457                       | 0.53                                          | 242                 |                                              | 1498                               |                                   | 375                                      |                                                | 457.4                    | 0.68                           | 311.03                         |                    | 311.03                              | 311.07                          | -0.04                             | 28.49                         | 28.45   |         |
| 72               | 1970 | Meng Peizhong                     | 1               | middle-class peasant     |                       |                        |                       |                         | 1                              |                           |                           |                                |                                        | 319.1                     | 23.0                             | 342.1                  | 18.4                                 |                                      |                                         |                                 |                                                       | 324                                      | 1.0                        | 314                                           |                                                  | 324                       | 0.53                                          | 172                 |                                              | 486                                |                                   | 486                                      |                                                |                          | 323.7                          | 0.68                           | 220.12             |                                     | 220.12                          | 214.11                            | 6.01                          | 260.84  | 266.85  |
| 73               | 1970 | Meng Peixing                      | 1               | middle-class peasant     |                       |                        |                       |                         | 12                             |                           |                           |                                |                                        | 1196.8                    | 216.0                            | 1412.8                 | 92.0                                 |                                      |                                         |                                 |                                                       | 1321                                     | 11.8                       | 314                                           |                                                  | 1321                      | 0.53                                          | 700                 |                                              | 4416                               |                                   | 368                                      |                                                | 1320.8                   | 0.68                           | 898.14                         |                    | 898.14                              | 1036.30                         | -138.16                           | 168.69                        | 30.53   |         |
| 74               | 1970 | Meng Mingbiao                     | 1               | middle-class peasant     |                       |                        |                       |                         | 1                              |                           |                           |                                |                                        | 120.0                     | 5.0                              | 125.0                  |                                      |                                      |                                         |                                 |                                                       | 125                                      | 1.0                        | 314                                           |                                                  | 125                       | 0.53                                          | 66                  |                                              | 380                                |                                   | 380                                      |                                                | 125                      | 0.68                           | 85.00                          |                    | 85.00                               |                                 | 85.00                             |                               |         | 85.00   |
| 75               | 1970 | Xue Yuhua                         | 2               | poor peasant             |                       |                        |                       |                         | 3                              |                           |                           |                                |                                        | 65.1                      | 45.1                             | 110.2                  |                                      |                                      |                                         |                                 |                                                       | 110                                      | 3.0                        | 314                                           |                                                  | 110                       | 0.53                                          | 58                  |                                              | 1000                               |                                   | 333                                      |                                                | 110.2                    | 0.68                           | 74.94                          |                    | 74.94                               | 157.90                          | -82.96                            | -30.54                        | -113.50 |         |
| 76               | 1970 | Wang Chuanai                      | 1               | middle-class peasant     |                       |                        |                       |                         | 4                              |                           |                           |                                |                                        |                           | 36.5                             | 36.5                   | 4.6                                  |                                      |                                         |                                 |                                                       | 32                                       | 4.0                        | 314                                           |                                                  | 32                        | 0.53                                          | 17                  |                                              | 1273                               |                                   | 318                                      |                                                | 31.9                     | 0.68                           | 21.69                          | 120                | 141.69                              | 185.19                          | -43.50                            | -210.54                       | -254.04 |         |
| 77               | 1970 | Wang Zhenguo                      | 2               | low-middle-class peasant |                       |                        |                       |                         | 9                              |                           |                           |                                |                                        | 619.0                     | 164.6                            | 783.6                  | 27.6                                 |                                      |                                         |                                 |                                                       | 756                                      | 8.8                        | 314                                           |                                                  | 756                       | 0.53                                          | 401                 |                                              | 3162                               |                                   | 351                                      |                                                | 756                      | 0.68                           | 514.08                         |                    | 514.08                              | 735.57                          | -221.49                           | 88.03                         | -133.46 |         |
| 78               | 1970 | Mu Shouquan                       | 1               | poor peasant             |                       |                        |                       |                         | 2                              |                           |                           |                                |                                        | 386.7                     | 51.5                             | 438.2                  | 20.7                                 |                                      |                                         |                                 |                                                       | 418                                      | 2.0                        | 314                                           |                                                  | 418                       | 0.53                                          | 221                 |                                              | 849                                |                                   | 425                                      |                                                | 417.5                    | 0.68                           | 283.90                         |                    | 283.90                              | 229.72                          | 54.18                             | 150.99                        | 205.17  |         |
| 79               | 1970 | Mu Zhaozheng                      | 1               | poor peasant             |                       |                        |                       |                         | 4                              |                           |                           |                                |                                        | 491.1                     | 96.4                             | 587.5                  | 29.9                                 |                                      |                                         |                                 |                                                       | 558                                      | 4.0                        | 314                                           |                                                  | 558                       | 0.53                                          | 296                 |                                              | 1552                               |                                   | 388                                      |                                                | 557.6                    | 0.68                           | 379.17                         |                    | 379.17                              | 337.82                          | 41.35                             | 133.17                        | 174.52  |         |
| 80               | 1970 | Ma Likui                          | 1               | poor peasant             |                       |                        |                       |                         | 6                              |                           |                           |                                |                                        | 764.8                     | 106.7                            | 871.5                  | 52.9                                 |                                      |                                         |                                 |                                                       | 819                                      | 6.0                        | 314                                           |                                                  | 819                       | 0.53                                          | 434                 |                                              | 2318                               |                                   | 386                                      |                                                | 818.6                    | 0.68                           | 556.65                         |                    | 556.65                              | 542.86                          | 13.79                             | 208.31                        | 222.10  |         |
| 81               | 1970 | Ma Xiulan                         | 1               | middle-class peasant     |                       |                        |                       |                         | 5                              |                           |                           |                                |                                        | 26.7                      | 30.3                             | 57.0                   | 4.6                                  |                                      |                                         |                                 |                                                       | 52                                       | 5.0                        | 314                                           |                                                  | 1570                      | 52                                            | 0.53                | 28                                           |                                    | 1598                              |                                          | 320                                            |                          | 52.4                           | 0.68                           | 35.63              | 150                                 | 185.63                          | 237.02                            | -51.39                        | -95.69  | -147.08 |
| 82               | 1970 | Wang Dianjie                      | 1               | middle-class peasant     |                       |                        |                       |                         | 7                              |                           |                           |                                |                                        | 633.6                     | 124.8                            | 758.4                  | 18.4                                 |                                      |                                         |                                 |                                                       | 740                                      | 7.0                        | 314                                           |                                                  | 740                       | 0.53                                          | 392                 |                                              | 2590                               |                                   | 370                                      |                                                | 740                      | 0.68                           | 503.20                         |                    | 503.20                              | 483.44                          | 19.76                             | -246.47                       | -226.71 |         |

(cont.)

| Household number | Year | Name of the head of the household | Production team | Class status (1)         | Basic work points (2) | Total labor forces (3) | Male labor forces (4) | Female labor forces (5) | Total household population (6) | Age: 1 to 3 years old (7) | Age: 4 to 7 years old (8) | Age: 8 years old and above (9) | Work points of grain distribution (10) | Laboring work points (11) | Farmyard manure work points (12) | Total work points (13) | Work points of compulsory labor (14) | Work points of help cultivation (15) | Work points of private plots labor (16) | Total deducted work points (17) | Acutal workdays of participation in distribution (18) | Workpoints for rations distribution (19) | Rations per workpoint (20) | Total rations received form distribution (21) | Workdays of participation in distribu-tion (22) | Grains per workpoint (23) | Total grains distributed by work-points (24) | Grains subsidy (25) | Total Grains received from distribution (26) | Distributed grains per person (27) | Distributed grains per adult (28) | Grains received from privated plots (29) | Workdays of participation in distribution (30) | Value per workpoint (31) | Total value of workpoints (32) | Money used for investment (33) | Sum of income (34) | Money distributed in this year (34) | Deposit/ debt of this year (35) | Deposit/ debt over the years (36) | Accumulated deposit/debt (37) |
|------------------|------|-----------------------------------|-----------------|--------------------------|-----------------------|------------------------|-----------------------|-------------------------|--------------------------------|---------------------------|---------------------------|--------------------------------|----------------------------------------|---------------------------|----------------------------------|------------------------|--------------------------------------|--------------------------------------|-----------------------------------------|---------------------------------|-------------------------------------------------------|------------------------------------------|----------------------------|-----------------------------------------------|-------------------------------------------------|---------------------------|----------------------------------------------|---------------------|----------------------------------------------|------------------------------------|-----------------------------------|------------------------------------------|------------------------------------------------|--------------------------|--------------------------------|--------------------------------|--------------------|-------------------------------------|---------------------------------|-----------------------------------|-------------------------------|
| 83               | 1970 | Wang Litang                       | 2               | low-middle-class peasant |                       |                        |                       |                         | 8                              |                           |                           |                                |                                        |                           | 815.3                            | 109.1                  | 924.4                                | 46.0                                 |                                         |                                 | 878                                                   | 7.8                                      | 314                        | 2447                                          | 878                                             | 0.53                      | 466                                          | 2913                |                                              | 364                                |                                   |                                          | 878.4                                          | 0.68                     | 597.31                         |                                | 597.31             | 614.98                              | -17.67                          | -116.06                           | -133.73                       |
| 84               | 1970 | Wei Zhaoliang                     | 1               | low-middle-class peasant |                       |                        |                       |                         | 4                              |                           |                           |                                |                                        |                           | 453.4                            | 78.9                   | 532.3                                | 23.0                                 |                                         |                                 | 509                                                   | 4.0                                      | 314                        | 1256                                          | 509                                             | 0.53                      | 270                                          | 1526                |                                              | 381                                |                                   |                                          | 509.3                                          | 0.68                     | 346.32                         |                                | 346.32             | 336.80                              | 9.52                            | 52.51                             | 62.03                         |
| 85               | 1970 | Yang Zhongwen                     | 1               | middle-class peasant     |                       |                        |                       |                         | 2                              |                           |                           |                                |                                        |                           |                                  | 25.4                   | 25.4                                 |                                      |                                         |                                 | 25                                                    | 2.0                                      | 314                        | 628                                           | 25                                              | 0.53                      | 13                                           | 641                 |                                              | 321                                |                                   |                                          | 25.4                                           | 0.68                     | 17.27                          |                                | 17.27              | 133.28                              | -116.01                         | -295.70                           | -411.71                       |
| 86               | 1970 | Zhu Guangchang                    | 1               | middle-class peasant     |                       |                        |                       |                         | 4                              |                           |                           |                                |                                        |                           | 505.4                            | 189.4                  | 694.8                                | 29.9                                 |                                         |                                 | 665                                                   | 4.0                                      | 314                        | 1256                                          | 665                                             | 0.53                      | 352                                          | 1608                |                                              | 402                                |                                   |                                          | 664.9                                          | 0.68                     | 452.13                         |                                | 452.13             | 377.98                              | 74.15                           | 82.42                             | 156.57                        |
| 87               | 1970 | Yang Yugui                        | 1               | middle-class peasant     |                       |                        |                       |                         | 3                              |                           |                           |                                |                                        |                           | 370.0                            | 73.2                   | 443.2                                |                                      |                                         |                                 | 443                                                   | 3.0                                      | 314                        | 942                                           | 443                                             | 0.53                      | 235                                          | 1177                |                                              | 392                                |                                   |                                          | 443.2                                          | 0.68                     | 301.38                         |                                | 301.38             | 274.78                              | 26.60                           | -32.94                            | -6.34                         |
| 88               | 1970 | Yang Yingzhou                     | 2               | middle-class peasant     |                       |                        |                       |                         | 3                              |                           |                           |                                |                                        |                           | 453.5                            | 87.9                   | 541.4                                | 29.9                                 |                                         |                                 | 512                                                   | 3.0                                      | 314                        | 942                                           | 512                                             | 0.53                      | 271                                          | 1213                |                                              | 404                                |                                   |                                          | 511.5                                          | 0.68                     | 347.82                         |                                | 347.82             | 311.27                              | 36.55                           | 125.95                            | 162.50                        |
| 89               | 1970 | Li Kailiang                       | 1               | poor peasant             |                       |                        |                       |                         | 3                              |                           |                           |                                |                                        |                           | 565.3                            | 57.0                   | 622.3                                | 11.5                                 |                                         |                                 | 611                                                   | 3.0                                      | 314                        | 942                                           | 611                                             | 0.53                      | 324                                          | 1266                |                                              | 422                                |                                   |                                          | 610.8                                          | 0.68                     | 415.34                         |                                | 415.34             | 353.93                              | 61.41                           | 155.48                            | 216.89                        |
| 90               | 1970 | Li Kaigong                        | 1               | poor peasant             |                       |                        |                       |                         | 3                              |                           |                           |                                |                                        |                           | 422.3                            | 67.3                   | 489.6                                | 23.0                                 |                                         |                                 | 467                                                   | 3.0                                      | 314                        | 942                                           | 467                                             | 0.53                      | 247                                          | 1189                |                                              | 396                                |                                   |                                          | 466.6                                          | 0.68                     | 317.29                         |                                | 317.29             | 288.10                              | 29.19                           | 97.92                             | 127.11                        |
| 91               | 1970 | Meng Jingcan                      | 1               | poor peasant             |                       |                        |                       |                         | 5                              |                           |                           |                                |                                        |                           | 112.0                            | 74.8                   | 186.8                                | 6.9                                  |                                         |                                 | 180                                                   | 5.0                                      | 314                        | 1570                                          | 180                                             | 0.53                      | 95                                           | 1665                |                                              | 333                                |                                   |                                          | 179.9                                          | 0.68                     | 122.33                         | 120                            | 242.33             | 249.08                              | -6.75                           | -7.55                             | -14.30                        |
| 92               | 1970 | Fu Lidong                         | 1               | middle-class peasant     |                       |                        |                       |                         | 1                              |                           |                           |                                |                                        |                           | 125.1                            | 23.3                   | 148.4                                | 6.9                                  |                                         |                                 | 142                                                   | 1.0                                      | 314                        | 314                                           | 142                                             | 0.53                      | 75                                           | 389                 |                                              | 389                                |                                   |                                          | 141.5                                          | 0.68                     | 96.22                          |                                | 96.22              | 91.30                               | 4.92                            | -6.84                             | -1.92                         |
| 93               | 1970 | Meng Peicheng                     | 2               | middle-class peasant     |                       |                        |                       |                         | 7                              |                           |                           |                                |                                        |                           | 436.8                            | 103.8                  | 540.6                                | 27.6                                 |                                         |                                 | 513                                                   | 7.0                                      | 314                        | 2198                                          | 513                                             | 0.53                      | 272                                          | 2470                |                                              | 353                                |                                   |                                          | 513                                            | 0.68                     | 348.84                         |                                | 348.84             | 510.95                              | -162.11                         | -495.8                            | -657.91                       |
| 94               | 1970 | Mu Shouwen                        | 1               | middle-class peasant     |                       |                        |                       |                         | 6                              |                           |                           |                                |                                        |                           | 625.8                            | 110.0                  | 735.8                                | 29.9                                 |                                         |                                 | 706                                                   | 6.0                                      | 314                        | 1884                                          | 706                                             | 0.53                      | 374                                          | 2258                |                                              | 376                                |                                   |                                          | 705.9                                          | 0.68                     | 480.01                         |                                | 480.01             | 475.16                              | 4.85                            | 70.19                             | 75.04                         |
| 95               | 1970 | Mu Zhaorui                        | 1               | middle-class peasant     |                       |                        |                       |                         | 1                              |                           |                           |                                |                                        |                           | 356.6                            | 5.0                    | 361.6                                | 23.0                                 |                                         |                                 | 339                                                   | 1.0                                      | 314                        | 314                                           | 339                                             | 0.53                      | 179                                          | 493                 |                                              | 493                                |                                   |                                          | 338.6                                          | 0.68                     | 230.25                         |                                | 230.25             | 256.86                              | -26.61                          | 276.46                            | 249.85                        |
| 96               | 1970 | Zhang Lirong                      | 2               | middle-class peasant     |                       |                        |                       |                         | 5                              |                           |                           |                                |                                        |                           | 793.4                            | 155.2                  | 948.6                                | 29.9                                 |                                         |                                 | 919                                                   | 5.0                                      | 314                        | 1570                                          | 919                                             | 0.53                      | 487                                          | 2057                |                                              | 411                                |                                   |                                          | 918.7                                          | 0.68                     | 624.72                         |                                | 624.72             | 548.50                              | 76.22                           | 247.01                            | 323.23                        |
| 97               | 1970 | Cui Yongfu                        | 1               | poor peasant             |                       |                        |                       |                         | 5                              |                           |                           |                                |                                        |                           | 727.9                            | 145.5                  | 873.4                                | 41.4                                 |                                         |                                 | 832                                                   | 5.0                                      | 314                        | 1570                                          | 832                                             | 0.53                      | 441                                          | 2011                |                                              | 402                                |                                   |                                          | 832                                            | 0.68                     | 565.76                         |                                | 565.76             | 475.48                              | 90.28                           | 136.90                            | 227.18                        |
| 98               | 1970 | Meng Lanying                      | 1               | poor peasant             |                       |                        |                       |                         | 1                              |                           |                           |                                |                                        |                           | 7.8                              | 8.5                    | 16.3                                 |                                      |                                         |                                 | 16                                                    | 1.0                                      | 314                        | 314                                           | 16                                              | 0.53                      | 9                                            | 323                 |                                              | 323                                |                                   |                                          | 16.3                                           | 0.68                     | 11.08                          |                                | 11.08              | 66.86                               | -55.78                          | -257.58                           | -313.36                       |
| 99               | 1970 | Cui Yiren                         | 1               | poor peasant             |                       |                        |                       |                         | 4                              |                           |                           |                                |                                        |                           | 359.5                            | 20.0                   | 379.5                                | 27.6                                 |                                         |                                 | 352                                                   | 3.6                                      | 314                        | 1139                                          | 352                                             | 0.53                      | 187                                          | 1326                |                                              | 331                                |                                   |                                          | 351.9                                          | 0.68                     | 239.29                         |                                | 239.29             | 304.54                              | -65.25                          | 61.42                             | -3.83                         |
| 100              | 1970 | Wang Qingde                       | 1               | low-middle-class peasant |                       |                        |                       |                         | 1                              |                           |                           |                                |                                        |                           | 444.0                            | 5.0                    | 449.0                                | 18.4                                 |                                         |                                 | 431                                                   | 1.0                                      | 314                        | 314                                           | 431                                             | 0.53                      | 228                                          | 542                 |                                              | 542                                |                                   |                                          | 430.6                                          | 0.68                     | 292.81                         |                                | 292.81             | 222.04                              | 70.77                           | 231.07                            | 301.84                        |
| 101              | 1970 | Jin Lianyu                        | 1               | poor peasant             |                       |                        |                       |                         | 1                              |                           |                           |                                |                                        |                           |                                  |                        | 0.0                                  |                                      |                                         |                                 | 0                                                     | 1.0                                      | 314                        | 314                                           | 0                                               | 0.53                      | 0                                            | 314                 |                                              | 314                                |                                   |                                          | 0                                              | 0.68                     | 0.00                           |                                | 0.00               | 90.48                               | -90.48                          | -729.33                           | -819.81                       |
| 102              | 1970 | Wang Qiyi                         | 1               | poor peasant             |                       |                        |                       |                         | 1                              |                           |                           |                                |                                        |                           | 207.9                            | 10.3                   | 218.2                                | 18.4                                 |                                         |                                 | 200                                                   | 1.0                                      | 314                        | 314                                           | 200                                             | 0.53                      | 106                                          | 420                 |                                              | 420                                |                                   |                                          | 199.8                                          | 0.68                     | 135.86                         |                                | 135.86             | 162.44                              | -26.58                          | 133.02                            | 106.44                        |

(cont.)

| Household number | Year | Name of the head of the household | Production team | Class status (1)         | Basic work points (2) | Total labor forces (3) | Male labor forces (4) | Female labor forces (5) | Total household population (6) | Age: 1 to 3 years old (7) | Age: 4 to 7 years old (8) | Age: 8 years old and above (9) | Work points of grain distribution (10) | Laboring work points (11) | Farmyard manure work points (12) | Total work points (13) | Work points of compulsory labor (14) | Work points of help cultivation (15) | Work points of private plots labor (16) | Total deducted work points (17) | Acutal workdays of participation in distribution (18) | Workpoints for rations distribution (19) | Rations per workpoint (20) | Total rations received form distribution (21) | Workdays of participation in distribu-tion (22) | Grains per workpoint (23) | Total grains distributed by work-points (24) | Grains subsidy (25) | Total Grains received from distribution (26) | Distributed grains per person (27) | Distributed grains per adult (28) | Grains received from privated plots (29) | Workdays of participation in distribution (30) | Value per workpoint (31) | Total value of workpoints (32) | Money used for investment (33) | Sum of income (34) | Money distributed in this year (34) | Deposit/ debt of this year (35) | Deposit/ debt over the years (36) | Accumulated deposit/debt (37) |
|------------------|------|-----------------------------------|-----------------|--------------------------|-----------------------|------------------------|-----------------------|-------------------------|--------------------------------|---------------------------|---------------------------|--------------------------------|----------------------------------------|---------------------------|----------------------------------|------------------------|--------------------------------------|--------------------------------------|-----------------------------------------|---------------------------------|-------------------------------------------------------|------------------------------------------|----------------------------|-----------------------------------------------|-------------------------------------------------|---------------------------|----------------------------------------------|---------------------|----------------------------------------------|------------------------------------|-----------------------------------|------------------------------------------|------------------------------------------------|--------------------------|--------------------------------|--------------------------------|--------------------|-------------------------------------|---------------------------------|-----------------------------------|-------------------------------|
| 103              | 1970 | Yang Chengye                      | 1               | poor peasant             |                       |                        |                       |                         | 1                              |                           |                           |                                |                                        |                           | 189.2                            | 10.3                   | 199.5                                | 13.8                                 |                                         |                                 | 186                                                   | 1.0                                      | 314                        | 314                                           | 186                                             | 0.53                      | 98                                           |                     | 412                                          | 412                                |                                   |                                          | 185.7                                          | 0.68                     | 126.28                         |                                | 126.28             | 136.56                              | -10.28                          | 110.41                            | 100.13                        |
| 104              | 1970 | Meng Mingjian                     | 1               | poor peasant             |                       |                        |                       |                         | 3                              |                           |                           |                                |                                        |                           | 328.0                            | 90.7                   | 418.7                                | 16.1                                 |                                         |                                 | 403                                                   | 3.0                                      | 314                        | 942                                           | 403                                             | 0.53                      | 213                                          |                     | 1155                                         | 385                                |                                   |                                          | 402.6                                          | 0.68                     | 273.77                         |                                | 273.77             | 290.82                              | -17.05                          | 46.93                             | 29.88                         |
| 105              | 1970 | Guo Yuexiang                      | 1               | poor peasant             |                       |                        |                       |                         | 5                              |                           |                           |                                |                                        |                           | 216.6                            | 143.5                  | 360.1                                | 4.6                                  |                                         |                                 | 356                                                   | 5.0                                      | 314                        | 1570                                          | 356                                             | 0.53                      | 188                                          |                     | 1758                                         | 352                                |                                   |                                          | 355.5                                          | 0.68                     | 241.74                         | 120                            | 361.74             | 266.08                              | 95.66                           | -100.40                           | -4.74                         |
| 106              | 1970 | Wu Congchao                       | 2               | poor peasant             |                       |                        |                       |                         | 7                              |                           |                           |                                |                                        |                           | 666.9                            | 151.9                  | 818.8                                | 59.8                                 |                                         |                                 | 759                                                   | 7.0                                      | 314                        | 2198                                          | 759                                             | 0.53                      | 402                                          |                     | 2600                                         | 371                                |                                   |                                          | 759                                            | 0.68                     | 516.12                         |                                | 516.12             | 567.31                              | -51.19                          | -354.91                           | -406.10                       |
| 107              | 1970 | Xie Yuzhen                        | 2               | poor peasant             |                       |                        |                       |                         | 1                              |                           |                           |                                |                                        |                           |                                  | 5.0                    | 5.0                                  |                                      |                                         |                                 | 5                                                     | 1.0                                      | 314                        | 314                                           | 5                                               | 0.53                      | 3                                            |                     | 317                                          | 317                                |                                   |                                          | 5                                              | 0.68                     | 3.40                           |                                | 3.40               | 62.26                               | -58.86                          |                                   | -58.86                        |
| 108              | 1970 | Wu Songlin                        | 2               | poor peasant             |                       |                        |                       |                         | 2                              |                           |                           |                                |                                        |                           | 20.1                             | 58.4                   | 78.5                                 |                                      |                                         |                                 | 79                                                    | 2.0                                      | 314                        | 628                                           | 79                                              | 0.53                      | 42                                           |                     | 670                                          | 335                                |                                   |                                          | 78.5                                           | 0.68                     | 53.38                          |                                | 53.38              | 146.84                              | -93.46                          | -669.81                           | -763.27                       |
| 109              | 1970 | Yang Chunmei                      | 2               | poor peasant             |                       |                        |                       |                         | 5                              |                           |                           |                                |                                        |                           | 152.9                            | 75.2                   | 228.1                                | 6.9                                  |                                         |                                 | 221                                                   | 5.0                                      | 314                        | 1570                                          | 221                                             | 0.53                      | 117                                          |                     | 1687                                         | 337                                |                                   |                                          | 221.2                                          | 0.68                     | 150.42                         |                                | 150.42             | 318.96                              | -168.54                         | -472.02                           | -640.56                       |
| 110              | 1970 | Wu Yulan                          | 2               | poor peasant             |                       |                        |                       |                         | 4                              |                           |                           |                                |                                        |                           | 207.9                            | 87.5                   | 295.                                 | 6.9                                  |                                         |                                 | 289                                                   | 4.0                                      | 314                        | 1256                                          | 289                                             | 0.53                      | 153                                          |                     | 1409                                         | 352                                |                                   |                                          | 288.5                                          | 0.68                     | 196.18                         | 100                            | 296.18             | 215.06                              | 81.12                           | 49.63                             | 130.75                        |
| 111              | 1970 | Hua Suzhen                        | 1               | poor peasant             |                       |                        |                       |                         | 2                              |                           |                           |                                |                                        |                           | 27.4                             | 21.8                   | 49.2                                 | 16.1                                 |                                         |                                 | 33                                                    | 2.0                                      | 314                        | 628                                           | 33                                              | 0.53                      | 18                                           |                     | 646                                          | 323                                |                                   |                                          | 33.1                                           | 0.68                     | 22.51                          |                                | 22.51              | 153.58                              | -131.07                         | 82.75                             | -48.32                        |
| 112              | 1970 | Song Liangxiang                   | 2               | poor peasant             |                       |                        |                       |                         | 1                              |                           |                           |                                |                                        |                           | 6.7                              | 5.0                    | 11.7                                 | 6.9                                  |                                         |                                 | 5                                                     | 1.0                                      | 314                        | 314                                           | 5                                               | 0.53                      | 3                                            |                     | 317                                          | 317                                |                                   |                                          | 4.8                                            | 0.68                     | 3.26                           | 23                             | 26.26              | 44.69                               | -18.43                          | 15.66                             | -2.77                         |
| 113              | 1970 | Zhang Dongde                      | 1               | poor peasant             |                       |                        |                       |                         | 3                              |                           |                           |                                |                                        |                           | 276.6                            | 96.7                   | 373.3                                | 16.1                                 |                                         |                                 | 357                                                   | 3.0                                      | 314                        | 942                                           | 357                                             | 0.53                      | 189                                          |                     | 1131                                         | 377                                |                                   |                                          | 357.2                                          | 0.68                     | 242.90                         |                                | 242.90             | 238.47                              | 4.43                            | 33.05                             | 37.48                         |
| 114              | 1970 | Zhang Zhenyuan                    | 1               | poor peasant             |                       |                        |                       |                         | 3                              |                           |                           |                                |                                        |                           | 372.6                            | 15.0                   | 387.6                                | 29.9                                 |                                         |                                 | 358                                                   | 3.0                                      | 314                        | 942                                           | 358                                             | 0.53                      | 190                                          |                     | 1132                                         | 377                                |                                   |                                          | 357.7                                          | 0.68                     | 243.24                         |                                | 243.24             | 253.81                              | -10.57                          | 77.32                             | 66.75                         |
| 115              | 1970 | Meng Qingyun                      | 2               | poor peasant             |                       |                        |                       |                         | 1                              |                           |                           |                                |                                        |                           | 311.0                            | 10.8                   | 321.8                                | 18.4                                 |                                         |                                 | 303                                                   | 1.0                                      | 314                        | 314                                           | 303                                             | 0.53                      | 161                                          |                     | 475                                          | 475                                |                                   |                                          | 303.4                                          | 0.68                     | 206.31                         |                                | 206.31             | 196.02                              | 10.29                           | 244.14                            | 254.43                        |
| 116              | 1970 | Zhao Hongsheng                    | 1               | low-middle-class peasant |                       |                        |                       |                         | 6                              |                           |                           |                                |                                        |                           | 788.9                            | 164.0                  | 952.9                                | 48.3                                 |                                         |                                 | 905                                                   | 6.0                                      | 314                        | 1884                                          | 905                                             | 0.53                      | 479                                          |                     | 2363                                         | 394                                |                                   |                                          | 904.6                                          | 0.68                     | 615.13                         |                                | 615.13             | 638.51                              | -23.38                          | -141.79                           | -165.17                       |
| 117              | 1970 | Mneg Mingyou                      | 2               | poor peasant             |                       |                        |                       |                         | 1                              |                           |                           |                                |                                        |                           | 226.7                            | 32.5                   | 259.2                                | 20.7                                 |                                         |                                 | 239                                                   | 1.0                                      | 314                        | 314                                           | 239                                             | 0.53                      | 126                                          |                     | 440                                          | 440                                |                                   |                                          | 238.5                                          | 0.68                     | 162.18                         |                                | 162.18             | 208.56                              | -46.38                          | 250.52                            | 204.14                        |
| 118              | 1970 | Xu Peishi                         | 1               | poor peasant             |                       |                        |                       |                         | 6                              |                           |                           |                                |                                        |                           | 406.0                            | 115.3                  | 521.3                                | 25.3                                 |                                         |                                 | 496                                                   | 6.0                                      | 314                        | 1884                                          | 496                                             | 0.53                      | 263                                          |                     | 2147                                         | 358                                |                                   |                                          | 496                                            | 0.68                     | 337.28                         |                                | 337.28             | 426.02                              | -88.74                          | -872.64                           | -961.38                       |
| 119              | 1970 | Wang Qingchang                    | 2               | poor peasant             |                       |                        |                       |                         | 4                              |                           |                           |                                |                                        |                           | 522.5                            | 110.5                  | 633.0                                | 6.9                                  |                                         |                                 | 626                                                   | 4.0                                      | 314                        | 1256                                          | 626                                             | 0.53                      | 332                                          |                     | 1588                                         | 397                                |                                   |                                          | 626.1                                          | 0.68                     | 425.75                         |                                | 425.75             | 471.96                              | -46.21                          | 325.16                            | 278.95                        |
| 120              | 1970 | Wang Qinghai                      | 2               | poor peasant             |                       |                        |                       |                         | 9                              |                           |                           |                                |                                        |                           | 570.2                            | 106.1                  | 676.3                                | 27.6                                 |                                         |                                 | 649                                                   | 9.0                                      | 314                        | 2826                                          | 649                                             | 0.53                      | 344                                          |                     | 3170                                         | 352                                |                                   |                                          | 648.7                                          | 0.68                     | 441.12                         |                                | 441.12             | 576.97                              | -135.85                         | -654.38                           | -790.23                       |
| 121              | 1970 | Cao Desheng                       | 2               | poor peasant             |                       |                        |                       |                         | 1                              |                           |                           |                                |                                        |                           | 212.4                            | 10.3                   | 222.7                                |                                      |                                         |                                 | 223                                                   | 1.0                                      | 314                        | 314                                           | 223                                             | 0.53                      | 118                                          |                     | 432                                          | 432                                |                                   |                                          | 222.7                                          | 0.68                     | 151.44                         |                                | 151.44             | 457.17                              | -305.73                         | 141.03                            | -164.70                       |
| 122              | 1970 | Ma Yuying                         | 2               | poor peasant             |                       |                        |                       |                         | 2                              |                           |                           |                                |                                        |                           |                                  | 10.0                   | 10.0                                 |                                      |                                         |                                 | 10                                                    | 2.0                                      | 314                        | 628                                           | 10                                              | 0.53                      | 5                                            |                     | 633                                          | 317                                |                                   |                                          | 10                                             | 0.68                     | 6.80                           | 70                             | 76.80              | 97.92                               | -21.12                          | 155.41                            | 134.29                        |
| 123              | 1970 | Liu Peizhen                       | 2               | poor peasant             |                       |                        |                       |                         | 1                              |                           |                           |                                |                                        |                           |                                  | 11.0                   | 11.0                                 |                                      |                                         |                                 | 11                                                    | 1.0                                      | 314                        | 314                                           | 11                                              | 0.53                      | 6                                            |                     | 320                                          | 320                                |                                   |                                          | 11                                             | 0.68                     | 7.48                           |                                | 7.48               | 80.33                               | -72.85                          | -270.54                           | -343.39                       |
| 124              | 1970 | Liu Dahai                         | 2               | middle-class peasant     |                       |                        |                       |                         | 3                              |                           |                           |                                |                                        |                           | 404.7                            | 85.1                   | 489.8                                | 32.2                                 |                                         |                                 | 458                                                   | 3.0                                      | 314                        | 942                                           | 458                                             | 0.53                      | 243                                          |                     | 1185                                         | 395                                |                                   |                                          | 457.6                                          | 0.68                     | 311.17                         |                                | 311.17             | 370.26                              | -59.09                          | 319.70                            | 260.61                        |
| 125              | 1970 | Liu Ercan                         | 2               | middle-class peasant     |                       |                        |                       |                         | 2                              |                           |                           |                                |                                        |                           | 2.8                              | 5.0                    | 7.8                                  |                                      |                                         |                                 | 8                                                     | 2.0                                      | 314                        | 628                                           | 8                                               | 0.53                      | 4                                            |                     | 632                                          | 316                                |                                   |                                          | 7.8                                            | 0.68                     | 5.30                           |                                | 5.30               | 138.21                              | -132.91                         | -373.65                           | -506.56                       |
| 126              | 1970 | Wu Jingxiang                      | 2               | low-middle-class peasant |                       |                        |                       |                         | 4                              |                           |                           |                                |                                        |                           | 53.0                             | 31.3                   | 84.3                                 | 4.6                                  |                                         |                                 | 80                                                    | 4.0                                      | 314                        | 1256                                          | 80                                              | 0.53                      | 42                                           |                     | 1298                                         | 325                                |                                   |                                          | 79.7                                           | 0.68                     | 54.20                          | 70                             | 124.20             | 182.00                              | -57.80                          | -45.81                            | -103.61                       |
| 127              | 1970 | Zhang Hengde                      | 2               | poor peasant             |                       |                        |                       |                         | 10                             |                           |                           |                                |                                        |                           | 1307.6                           | 238.5                  | 1546.1                               | 80.5                                 |                                         |                                 | 1466                                                  | 10.0                                     | 314                        | 3140                                          | 1466                                            | 0.53                      | 777                                          |                     | 3917                                         | 392                                |                                   |                                          | 1465.6                                         | 0.68                     | 996.61                         |                                | 996.61             | 994.48                              | 2.13                            | 574.27                            | 576.40                        |
| 128              | 1970 | Zhang Hengde                      | 2               | poor peasant             |                       |                        |                       |                         | 1                              |                           |                           |                                |                                        |                           | 353.1                            | 28.6                   | 381.7                                | 18.4                                 |                                         |                                 | 363                                                   | 1.0                                      | 314                        | 314                                           | 363                                             | 0.53                      | 193                                          |                     | 507                                          | 507                                |                                   |                                          | 363.3                                          | 0.68                     | 247.04                         |                                | 247.04             | 238.98                              | 8.06                            | 191.13                            | 199.19                        |
| 129              | 1970 | Wei Zhaoxiang                     | 2               | low-middle-class peasant |                       |                        |                       |                         | 3                              |                           |                           |                                |                                        |                           | 433.9                            | 29.9                   | 463.8                                | 23.0                                 |                                         |                                 | 441                                                   | 3.0                                      | 314                        | 942                                           | 441                                             | 0.53                      | 234                                          |                     | 1176                                         | 392                                |                                   |                                          | 440.8                                          | 0.68                     | 299.74                         |                                | 299.74             | 318.60                              | -18.86                          | 196.55                            | 177.69                        |



(cont.)

| Household number | Year | Name of the head of the household | Production team | Class status (1)         | Basic work points (2) | Total labor forces (3) | Male labor forces (4) | Female labor forces (5) | Total household population (6) | Age: 1 to 3 years old (7) | Age: 4 to 7 years old (8) | Age: 8 years old and above (9) | Work points of grain distribution (10) | Laboring work points (11) | Farmyard manure work points (12) | Total work points (13) | Work points of compulsory labor (14) | Work points of help cultivation (15) | Work points of private plots labor (16) | Total deducted work points (17) | Acutal workdays of participation in distribution (18) | Workpoints for rations distribution (19) | Rations per workpoint (20) | Total rations received form distribution (21) | Workdays of participation in distribu-tion (22) | Grains per workpoint (23) | Total grains distributed by work-points (24) | Grains subsidy (25) | Total Grains received from distribution (26) | Distributed grains per person (27) | Distributed grains per adult (28) | Grains received from privated plots (29) | Workdays of participation in distribution (30) | Value per workpoint (31) | Total value of workpoints (32) | Money used for investment (33) | Sum of income (34) | Money distributed in this year (34) | Deposit/ debt of this year (35) | Deposit/ debt over the years (36) | Accumulated deposit/debt (37) |
|------------------|------|-----------------------------------|-----------------|--------------------------|-----------------------|------------------------|-----------------------|-------------------------|--------------------------------|---------------------------|---------------------------|--------------------------------|----------------------------------------|---------------------------|----------------------------------|------------------------|--------------------------------------|--------------------------------------|-----------------------------------------|---------------------------------|-------------------------------------------------------|------------------------------------------|----------------------------|-----------------------------------------------|-------------------------------------------------|---------------------------|----------------------------------------------|---------------------|----------------------------------------------|------------------------------------|-----------------------------------|------------------------------------------|------------------------------------------------|--------------------------|--------------------------------|--------------------------------|--------------------|-------------------------------------|---------------------------------|-----------------------------------|-------------------------------|
| 130              | 1970 | Mu Zhaoren                        | 2               | poor peasant             |                       |                        |                       |                         | 6                              |                           |                           |                                |                                        | 419.0                     | 98.1                             | 517.1                  | 27.6                                 |                                      |                                         |                                 | 490                                                   | 6.0                                      | 314                        | 1884                                          | 490                                             | 0.53                      | 259                                          | 2143                |                                              |                                    |                                   | 489.5                                    | 0.68                                           | 332.86                   |                                | 332.86                         | 436.30             | -103.44                             | -214.47                         | -317.91                           |                               |
| 131              | 1970 | Li Shiying                        | 2               | poor peasant             |                       |                        |                       |                         | 2                              |                           |                           |                                |                                        | 197.0                     | 10.0                             | 207.0                  | 13.8                                 |                                      |                                         |                                 | 193                                                   | 2.0                                      | 314                        | 628                                           | 193                                             | 0.53                      | 102                                          | 730                 |                                              |                                    |                                   | 193.2                                    | 0.68                                           | 131.38                   |                                | 131.38                         | 164.86             | -33.48                              | -13.66                          | -47.14                            |                               |
| 132              | 1970 | Wu Jinggui                        | 1               | low-middle-class peasant |                       |                        |                       |                         | 7                              |                           |                           |                                |                                        | 1111.6                    | 177.2                            | 1288.8                 | 59.8                                 |                                      |                                         |                                 | 1229                                                  | 7.0                                      | 314                        | 2198                                          | 1229                                            | 0.53                      | 651                                          | 2849                |                                              |                                    |                                   | 1229                                     | 0.68                                           | 835.72                   |                                | 835.72                         | 738.42             | 97.30                               | 254.94                          | 352.24                            |                               |
| 133              | 1970 | Wu Jingfang                       | 2               | middle-class peasant     |                       |                        |                       |                         | 7                              |                           |                           |                                |                                        | 326.5                     | 151.0                            | 477.5                  | 23.0                                 |                                      |                                         |                                 | 455                                                   | 7.0                                      | 314                        | 2198                                          | 455                                             | 0.53                      | 241                                          | 2439                |                                              |                                    |                                   | 454.5                                    | 0.68                                           | 309.06                   |                                | 309.06                         | 455.11             | -146.05                             | -233.70                         | -379.75                           |                               |
| 134              | 1970 | Wu Jingyu                         | 2               | low-middle-class peasant |                       |                        |                       |                         | 7                              |                           |                           |                                |                                        | 913.4                     | 199.0                            | 1112.4                 | 55.2                                 |                                      |                                         |                                 | 1057                                                  | 7.0                                      | 314                        | 2198                                          | 1057                                            | 0.53                      | 560                                          | 2758                |                                              |                                    |                                   | 1057.2                                   | 0.68                                           | 718.90                   |                                | 718.90                         | 621.18             | 97.72                               | 200.16                          | 297.88                            |                               |
| 135              | 1970 | Wu Jinghua                        | 2               | low-middle-class peasant |                       |                        |                       |                         | 6                              |                           |                           |                                |                                        | 947.2                     | 140.0                            | 1087.2                 | 64.4                                 |                                      |                                         |                                 | 1023                                                  | 6.0                                      | 314                        | 1884                                          | 1023                                            | 0.53                      | 542                                          | 2426                |                                              |                                    |                                   | 1022.8                                   | 0.68                                           | 695.50                   |                                | 695.50                         | 611.87             | 83.63                               | 132.48                          | 216.11                            |                               |
| 136              | 1970 | Wu Changbiao                      | 2               | middle-class peasant     |                       |                        |                       |                         | 1                              |                           |                           |                                |                                        | 283.4                     | 5.0                              | 288.4                  | 13.8                                 |                                      |                                         |                                 | 275                                                   | 1.0                                      | 314                        | 314                                           | 275                                             | 0.53                      | 146                                          | 460                 |                                              |                                    |                                   | 274.6                                    | 0.68                                           | 186.73                   |                                | 186.73                         | 177.71             | 9.02                                | 132.32                          | 141.34                            |                               |
| 137              | 1970 | Wu Jingnan                        | 2               | middle-class peasant     |                       |                        |                       |                         | 6                              |                           |                           |                                |                                        | 523.3                     | 170.4                            | 693.7                  | 23.0                                 |                                      |                                         |                                 | 671                                                   | 6.0                                      | 314                        | 1884                                          | 671                                             | 0.53                      | 355                                          | 2239                |                                              |                                    |                                   | 670.7                                    | 0.68                                           | 456.08                   |                                | 456.08                         | 508.82             | -52.74                              | 55.00                           | 2.26                              |                               |
| 138              | 1970 | Wu Jing'an                        | 2               | middle-class peasant     |                       |                        |                       |                         | 3                              |                           |                           |                                |                                        | 498.5                     | 87.2                             | 585.7                  | 29.9                                 |                                      |                                         |                                 | 556                                                   | 3.0                                      | 314                        | 943                                           | 556                                             | 0.53                      | 295                                          | 1238                |                                              |                                    |                                   | 555.8                                    | 0.68                                           | 377.94                   |                                | 377.94                         | 321.71             | 56.23                               | 231.76                          | 287.99                            |                               |
| 139              | 1970 | Wu Jinghui                        | 2               | middle-class peasant     |                       |                        |                       |                         | 5                              |                           |                           |                                |                                        | 451.2                     | 205.3                            | 656.5                  | 27.6                                 |                                      |                                         |                                 | 629                                                   | 5.0                                      | 314                        | 1570                                          | 629                                             | 0.53                      | 333                                          | 1903                |                                              |                                    |                                   | 628.9                                    | 0.68                                           | 427.65                   |                                | 427.65                         | 446.87             | -19.22                              | 155.48                          | 136.26                            |                               |
| 140              | 1970 | Wu Jingying                       | 2               | middle-class peasant     |                       |                        |                       |                         | 8                              |                           |                           |                                |                                        | 431.2                     | 157.1                            | 588.3                  | 27.6                                 |                                      |                                         |                                 | 561                                                   | 8.0                                      | 314                        | 2512                                          | 561                                             | 0.53                      | 297                                          | 2809                |                                              |                                    |                                   | 560.7                                    | 0.68                                           | 381.28                   |                                | 381.28                         | 518.29             | -137.01                             | -138.60                         | -275.61                           |                               |
| 141              | 1970 | Wu Jingfu                         | 2               | middle-class peasant     |                       |                        |                       |                         | 8                              |                           |                           |                                |                                        | 813.7                     | 273.1                            | 1086.8                 | 46.0                                 |                                      |                                         |                                 | 1041                                                  | 8.0                                      | 314                        | 2512                                          | 1041                                            | 0.53                      | 552                                          | 3064                |                                              |                                    |                                   | 1040.8                                   | 0.68                                           | 707.74                   |                                | 707.74                         | 624.26             | 83.48                               | -31.60                          | 51.88                             |                               |
| 142              | 1970 | Meng Dongmei                      | 2               | low-middle-class peasant |                       |                        |                       |                         | 4                              |                           |                           |                                |                                        | 80.8                      | 50.1                             | 130.9                  | 4.6                                  |                                      |                                         |                                 | 126                                                   | 4.0                                      | 314                        | 1256                                          | 126                                             | 0.53                      | 67                                           | 1323                |                                              |                                    |                                   | 126.3                                    | 0.68                                           | 85.88                    | 170                            | 255.88                         | 178.10             | 77.78                               | -180.80                         | -103.02                           |                               |
| 143              | 1970 | Mneg Tianyu                       | 2               | poor peasant             |                       |                        |                       |                         | 8                              |                           |                           |                                |                                        | 802.8                     | 157.7                            | 960.5                  | 50.6                                 |                                      |                                         |                                 | 910                                                   | 7.8                                      | 314                        | 2434                                          | 910                                             | 0.53                      | 482                                          | 2916                |                                              |                                    |                                   | 909.9                                    | 0.68                                           | 618.73                   |                                | 618.73                         | 627.60             | -8.87                               | 219.59                          | 210.72                            |                               |
| 144              | 1970 | Xue Lanying                       | 2               | middle-class peasant     |                       |                        |                       |                         | 1                              |                           |                           |                                |                                        |                           | 10.3                             | 10.3                   |                                      |                                      |                                         |                                 | 10                                                    | 1.0                                      | 314                        | 314                                           | 10                                              | 0.53                      | 5                                            | 319                 |                                              |                                    |                                   | 10.3                                     | 0.68                                           | 7.00                     |                                | 7.00                           | 75.98              | -68.98                              | -428.76                         | -497.74                           |                               |
| 145              | 1970 | Wang Shufu                        | 2               | poor peasant             |                       |                        |                       |                         | 1                              |                           |                           |                                |                                        | 295.3                     | 5.0                              | 300.3                  | 20.7                                 |                                      |                                         |                                 | 280                                                   | 1.0                                      | 314                        | 314                                           | 280                                             | 0.53                      | 148                                          | 462                 |                                              |                                    |                                   | 279.6                                    | 0.68                                           | 190.13                   |                                | 190.13                         | 252.33             | -62.20                              | 236.87                          | 174.67                            |                               |
| 146              | 1970 | Li Changsheng                     | 2               | poor peasant             |                       |                        |                       |                         | 7                              |                           |                           |                                |                                        | 701.7                     | 136.4                            | 838.1                  | 4.6                                  |                                      |                                         |                                 | 834                                                   | 6.6                                      | 314                        | 2058                                          | 834                                             | 0.53                      | 442                                          | 2500                |                                              |                                    |                                   | 833.5                                    | 0.68                                           | 566.78                   |                                | 566.78                         | 556.05             | 10.73                               | 198.48                          | 209.21                            |                               |
| 147              | 1970 | Zhang Yongqing                    | 2               | poor peasant             |                       |                        |                       |                         | 2                              |                           |                           |                                |                                        | 559.8                     | 46.8                             | 606.6                  | 29.9                                 |                                      |                                         |                                 | 577                                                   | 2.0                                      | 314                        | 628                                           | 577                                             | 0.53                      | 306                                          | 934                 |                                              |                                    |                                   | 576.7                                    | 0.68                                           | 392.16                   |                                | 392.16                         | 318.48             | 73.68                               | 312.55                          | 386.23                            |                               |
| 148              | 1970 | Wang Suzhen                       | 2               | poor peasant             |                       |                        |                       |                         | 1                              |                           |                           |                                |                                        | 16.5                      | 10.3                             | 26.8                   |                                      |                                      |                                         |                                 | 27                                                    | 1.0                                      | 314                        | 314                                           | 27                                              | 0.53                      | 14                                           | 328                 |                                              |                                    |                                   | 26.8                                     | 0.68                                           | 18.22                    |                                | 18.22                          | 82.01              | -63.79                              | -393.84                         | -457.63                           |                               |

(cont.)

| Household number | Year | Name of the head of the household | Production team | Class status (1)           | Basic work points (2) | Total labor forces (3) | Male labor forces (4) | Female labor forces (5) | Total household population (6) | Age: 1 to 3 years old (7) | Age: 4 to 7 years old (8) | Age: 8 years old and above (9) | Work points of grain distribution (10) | Laboring work points (11) | Farmyard manure work points (12) | Total work points (13) | Work points of compulsory labor (14) | Work points of help cultivation (15) | Work points of private plots labor (16) | Total deducted work points (17) | Acutal workdays of participation in distribution (18) | Workpoints for rations distribution (19) | Rations per workpoint (20) | Total rations received form distribution (21) | Workdays of participation in distribu-tion (22) | Grains per workpoint (23) | Total grains distributed by work-points (24) | Grains subsidy (25) | Total Grains received from distribution (26) | Distributed grains per person (27) | Distributed grains per adult (28) | Grains received from privated plots (29) | Workdays of participation in distribution (30) | Value per workpoint (31) | Total value of workpoints (32) | Money used for investment (33) | Sum of income (34) | Money distributed in this year (34) | Deposit/ debt of this year (35) | Deposit/ debt over the years (36) | Accumulated deposit/debt (37) |         |  |
|------------------|------|-----------------------------------|-----------------|----------------------------|-----------------------|------------------------|-----------------------|-------------------------|--------------------------------|---------------------------|---------------------------|--------------------------------|----------------------------------------|---------------------------|----------------------------------|------------------------|--------------------------------------|--------------------------------------|-----------------------------------------|---------------------------------|-------------------------------------------------------|------------------------------------------|----------------------------|-----------------------------------------------|-------------------------------------------------|---------------------------|----------------------------------------------|---------------------|----------------------------------------------|------------------------------------|-----------------------------------|------------------------------------------|------------------------------------------------|--------------------------|--------------------------------|--------------------------------|--------------------|-------------------------------------|---------------------------------|-----------------------------------|-------------------------------|---------|--|
| 149              | 1970 | Liu Chunxiang                     | 2               | upper-middle-class peasant |                       |                        |                       |                         | 4                              |                           |                           |                                |                                        | 682.1                     | 145.8                            | 827.9                  | 36.8                                 |                                      |                                         |                                 |                                                       | 791                                      | 4.0                        | 314                                           | 1256                                            | 791                       | 0.53                                         | 419                 |                                              | 1675                               | 419                               |                                          |                                                | 791.1                    | 0.68                           | 537.95                         |                    | 537.95                              | 416.59                          | 121.36                            | 140.63                        | 261.99  |  |
| 150              | 1970 | Liu Chunyou                       | 2               | low-middle-class peasant   |                       |                        |                       |                         | 3                              |                           |                           |                                |                                        | 788.7                     | 146.1                            | 934.8                  | 48.3                                 |                                      |                                         |                                 |                                                       | 887                                      | 3.0                        | 314                                           | 942                                             | 887                       | 0.53                                         | 470                 |                                              | 1412                               | 471                               |                                          |                                                | 886.5                    | 0.68                           | 602.82                         |                    | 602.82                              | 610.33                          | -7.51                             | 548.16                        | 540.65  |  |
| 151              | 1970 | Wang Kaitai                       | 2               | middle-class peasant       |                       |                        |                       |                         | 2                              |                           |                           |                                |                                        | 287.4                     | 55.5                             | 342.9                  | 23.0                                 |                                      |                                         |                                 |                                                       | 320                                      | 2.0                        | 314                                           | 628                                             | 320                       | 0.53                                         | 170                 |                                              | 798                                | 399                               |                                          |                                                | 319.9                    | 0.68                           | 217.53                         |                    | 217.53                              | 267.00                          | -49.47                            | 161.92                        | 112.45  |  |
| 152              | 1970 | Meng Minghuan                     | 2               | middle-class peasant       |                       |                        |                       |                         | 3                              |                           |                           |                                |                                        | 170.1                     | 241.3                            | 411.4                  | 11.5                                 |                                      |                                         |                                 |                                                       | 400                                      | 3.0                        | 314                                           | 942                                             | 400                       | 0.53                                         | 212                 |                                              | 1154                               | 385                               |                                          |                                                | 399.9                    | 0.68                           | 271.93                         |                    | 271.93                              | 234.62                          | 37.31                             | -99.32                        | -62.01  |  |
| 153              | 1970 | Meng Qingfu                       | 2               | middle-class peasant       |                       |                        |                       |                         | 1                              |                           |                           |                                |                                        | 402.1                     |                                  | 402.1                  | 23.0                                 |                                      |                                         |                                 |                                                       | 379                                      | 1.0                        | 314                                           | 314                                             | 379                       | 0.53                                         | 201                 |                                              | 515                                | 515                               |                                          |                                                | 379.1                    | 0.68                           | 257.79                         |                    | 257.79                              | 279.40                          | -21.61                            | 232.84                        | 211.23  |  |
| 154              | 1970 | Mneg Qingsheng                    | 2               | middle-class peasant       |                       |                        |                       |                         | 1                              |                           |                           |                                |                                        | 361.5                     |                                  | 361.5                  | 23.0                                 |                                      |                                         |                                 |                                                       | 339                                      | 1.0                        | 314                                           | 314                                             | 339                       | 0.53                                         | 179                 |                                              | 493                                | 493                               |                                          |                                                | 338.5                    | 0.68                           | 230.18                         |                    | 230.18                              | 247.04                          | -16.86                            | 164.40                        | 147.54  |  |
| 155              | 1970 | Meng Qingbao                      | 2               | middle-class peasant       |                       |                        |                       |                         | 2                              |                           |                           |                                |                                        | 201.7                     | 7.5                              | 209.2                  | 20.7                                 |                                      |                                         |                                 |                                                       | 189                                      | 2.0                        | 314                                           | 628                                             | 189                       | 0.53                                         | 100                 |                                              | 728                                | 364                               |                                          |                                                | 188.5                    | 0.68                           | 128.18                         |                    | 128.18                              | 165.26                          | -37.08                            | -217.89                       | -254.97 |  |
| 156              | 1970 | Cao Jincheng                      | 2               | poor peasant               |                       |                        |                       |                         | 1                              |                           |                           |                                |                                        | 216.9                     | 5.0                              | 221.9                  | 20.7                                 |                                      |                                         |                                 |                                                       | 201                                      | 1.0                        | 314                                           | 314                                             | 201                       | 0.53                                         | 107                 |                                              | 421                                | 421                               |                                          |                                                | 201.2                    | 0.68                           | 136.82                         |                    | 136.82                              | 177.94                          | -41.12                            | 120.55                        | 79.43   |  |
| 157              | 1970 | Cao Jinwei                        | 2               | poor peasant               |                       |                        |                       |                         | 2                              |                           |                           |                                |                                        | 414.1                     | 82.5                             | 496.6                  | 27.6                                 |                                      |                                         |                                 |                                                       | 469                                      | 2.0                        | 314                                           | 628                                             | 469                       | 0.53                                         | 249                 |                                              | 877                                | 438                               |                                          |                                                | 469                      | 0.68                           | 318.92                         |                    | 318.92                              | 309.50                          | 9.42                              | 263.31                        | 272.73  |  |
| 158              | 1970 | Meng Tianlai                      | 2               | middle-class peasant       |                       |                        |                       |                         | 3                              |                           |                           |                                |                                        | 406.4                     | 164.0                            | 570.4                  | 4.6                                  |                                      |                                         |                                 |                                                       | 566                                      | 3.0                        | 314                                           | 942                                             | 566                       | 0.53                                         | 300                 |                                              | 1242                               | 414                               |                                          |                                                | 565.8                    | 0.68                           | 384.74                         |                    | 384.74                              | 328.23                          | 56.51                             | 116.53                        | 173.04  |  |
| 159              | 1970 | Yu Guiying                        | 1               | poor peasant               |                       |                        |                       |                         |                                |                           |                           |                                |                                        |                           | 32.0                             | 32.0                   |                                      |                                      |                                         |                                 |                                                       | 32                                       | 0.0                        | 314                                           |                                                 | 32                        | 0.53                                         | 17                  |                                              | 17                                 | #DIV/0!                           |                                          |                                                | 32                       | 0.68                           | 21.76                          |                    | 21.76                               | 70.60                           | -48.84                            | -308.85                       | -357.69 |  |
| 160              | 1970 | Liu Chunxiao                      | 2               | upper-middle-class peasant |                       |                        |                       |                         | 2                              |                           |                           |                                |                                        | 348.1                     | 55.4                             | 403.5                  | 23.0                                 |                                      |                                         |                                 |                                                       | 381                                      | 2.0                        | 314                                           | 628                                             | 381                       | 0.53                                         | 202                 |                                              | 830                                | 415                               |                                          |                                                | 380.5                    | 0.68                           | 258.74                         |                    | 258.74                              | 199.84                          | 58.90                             | 50.57                         | 109.47  |  |
| 161              | 1970 | Meng Qinghua                      | 2               | low-middle-class peasant   |                       |                        |                       |                         | 1                              |                           |                           |                                |                                        | 246.6                     | 45.2                             | 291.8                  | 19.4                                 |                                      |                                         |                                 |                                                       | 272                                      | 1.0                        | 314                                           | 314                                             | 272                       | 0.53                                         | 144                 |                                              | 458                                | 458                               |                                          |                                                | 272.4                    | 0.68                           | 185.23                         |                    | 185.23                              | 166.01                          | 19.22                             | 139.40                        | 158.62  |  |
| 162              | 1970 | Meng Peigui                       | 2               | rich peasant               |                       |                        |                       |                         | 2                              |                           |                           |                                |                                        | 379.8                     | 41.6                             | 421.4                  | 52.9                                 |                                      |                                         |                                 |                                                       | 369                                      | 2.0                        | 314                                           | 628                                             | 369                       | 0.53                                         | 195                 |                                              | 823                                | 412                               |                                          |                                                | 368.5                    | 0.68                           | 250.58                         |                    | 250.58                              | 225.52                          | 25.06                             | 184.29                        | 209.35  |  |
| 163              | 1970 | Meng Peiji                        | 2               | rich peasant               |                       |                        |                       |                         | 7                              |                           |                           |                                |                                        | 519.6                     | 266.4                            | 786.0                  | 62.1                                 |                                      |                                         |                                 |                                                       | 724                                      | 7.0                        | 314                                           | 2198                                            | 724                       | 0.53                                         | 384                 |                                              | 2582                               | 369                               |                                          |                                                | 723.9                    | 0.68                           | 492.25                         | 10                 | 502.25                              | 467.61                          | 34.64                             | -348.37                       | -313.73 |  |
| 164              | 1970 | Meng Jinghuan                     | 2               | upper-middle-class peasant |                       |                        |                       |                         | 3                              |                           |                           |                                |                                        | 202.1                     | 33.0                             | 235.1                  | 11.5                                 |                                      |                                         |                                 |                                                       | 224                                      | 3.0                        | 314                                           | 942                                             | 224                       | 0.53                                         | 119                 |                                              | 1061                               | 354                               |                                          |                                                | 223.6                    | 0.68                           | 152.05                         | 20                 | 172.05                              | 183.50                          | -11.45                            | 42.07                         | 30.62   |  |
| 165              | 1970 | Lan Jinzhi                        | 1               | poor peasant               |                       |                        |                       |                         | 7                              |                           |                           |                                |                                        | 580.0                     | 193.6                            | 773.6                  | 34.5                                 |                                      |                                         |                                 |                                                       | 739                                      | 7.0                        | 314                                           | 2198                                            | 739                       | 0.53                                         | 392                 |                                              | 2590                               | 370                               |                                          |                                                | 739.1                    | 0.68                           | 502.59                         |                    | 502.59                              |                                 | 502.59                            |                               | 502.59  |  |
| 166              | 1970 | Wang Jinshu                       | 2               | upper-middle-class peasant |                       |                        |                       |                         | 1                              |                           |                           |                                |                                        |                           | 38.7                             | 38.7                   |                                      |                                      |                                         |                                 |                                                       | 39                                       | 1.0                        | 314                                           | 314                                             | 39                        | 0.53                                         | 21                  |                                              | 335                                | 335                               |                                          |                                                | 38.7                     | 0.68                           | 26.32                          | 20                 | 46.32                               | 51.39                           | -5.07                             | -15.32                        | -20.39  |  |
| 167              | 1970 | Cao Xiangyun                      | 2               | upper-middle-class peasant |                       |                        |                       |                         | 6                              |                           |                           |                                |                                        | 8.3                       | 146.9                            | 155.2                  | 4.6                                  |                                      |                                         |                                 |                                                       | 151                                      | 6.0                        | 314                                           | 1884                                            | 151                       | 0.53                                         | 80                  |                                              | 1964                               | 327                               |                                          |                                                | 150.6                    | 0.68                           | 102.41                         | 200                | 302.41                              | 294.70                          | 7.71                              | -82.31                        | -74.60  |  |



(cont.)

| Household number | Year | Name of the head of the household | Production team | Class status (1)         | Basic work points (2) | Total labor forces (3) | Male labor forces (4) | Female labor forces (5) | Total household population (6) | Age: 1 to 3 years old (7) | Age: 4 to 7 years old (8) | Age: 8 years old and above (9) | Work points of grain distribution (10) | Laboring work points (11) | Farmyard manure work points (12) | Total work points (13) | Work points of compulsory labor (14) | Work points of help cultivation (15) | Work points of private plots labor (16) | Total deducted work points (17) | Acutal workdays of participation in distribution (18) | Workpoints for rations distribution (19) | Rations per workpoint (20) | Total rations received form distribution (21) | Workdays of participation in distribu-tion (22) | Grains per workpoint (23) | Total grains distributed by work-points (24) | Grains subsidy (25) | Total Grains received from distribution (26) | Distributed grains per person (27) | Distributed grains per adult (28) | Grains received from privated plots (29) | Workdays of participation in distribution (30) | Value per workpoint (31) | Total value of workpoints (32) | Money used for investment (33) | Sum of income (34) | Money distributed in this year (34) | Deposit/ debt of this year (35) | Deposit/ debt over the years (36) | Accumulated deposit/debt (37) |
|------------------|------|-----------------------------------|-----------------|--------------------------|-----------------------|------------------------|-----------------------|-------------------------|--------------------------------|---------------------------|---------------------------|--------------------------------|----------------------------------------|---------------------------|----------------------------------|------------------------|--------------------------------------|--------------------------------------|-----------------------------------------|---------------------------------|-------------------------------------------------------|------------------------------------------|----------------------------|-----------------------------------------------|-------------------------------------------------|---------------------------|----------------------------------------------|---------------------|----------------------------------------------|------------------------------------|-----------------------------------|------------------------------------------|------------------------------------------------|--------------------------|--------------------------------|--------------------------------|--------------------|-------------------------------------|---------------------------------|-----------------------------------|-------------------------------|
| 168              | 1970 | Li Shibao                         | 2               | poor peasant             |                       |                        |                       |                         | 8                              |                           |                           |                                |                                        | 484.5                     | 132.1                            | 616.6                  | 4.6                                  |                                      |                                         |                                 | 612                                                   | 8.0                                      | 314                        | 2512                                          | 612                                             | 0.53                      | 324                                          | 2836                | 355                                          |                                    |                                   | 612                                      | 0.68                                           | 416.16                   | 416.16                         | 543.75                         | -127.59            | -774.30                             | -901.89                         |                                   |                               |
| 169              | 1970 | Wang Kailu                        | 2               | poor peasant             |                       |                        |                       |                         | 5                              |                           |                           |                                |                                        | 778.0                     | 135.9                            | 913.9                  | 46.0                                 |                                      |                                         |                                 | 868                                                   | 5.0                                      | 314                        | 1570                                          | 868                                             | 0.53                      | 460                                          | 2030                | 406                                          |                                    |                                   | 867.9                                    | 0.68                                           | 590.17                   | 590.17                         | 471.11                         | 119.06             | 133.00                              | 252.06                          |                                   |                               |
| 170              | 1970 | Zhao Hongrui                      | 1               | middle-class peasant     |                       |                        |                       |                         | 8                              |                           |                           |                                |                                        | 1032.0                    | 166.2                            | 1198.2                 | 64.4                                 |                                      |                                         |                                 | 1134                                                  | 8.0                                      | 314                        | 2512                                          | 1134                                            | 0.53                      | 601                                          | 3113                | 389                                          |                                    |                                   | 1133.8                                   | 0.68                                           | 770.98                   | 770.98                         | 750.58                         | 20.40              | 31.22                               | 51.62                           |                                   |                               |
| 171              | 1970 | Fang Chunxing                     | 0               | middle-class peasant     |                       |                        |                       |                         |                                |                           |                           |                                |                                        |                           |                                  | 0.0                    |                                      |                                      |                                         |                                 | 0                                                     | 0.0                                      | 314                        |                                               | 0                                               | 0.53                      | 0                                            | 0                   | #DIV/0!                                      |                                    |                                   | 0                                        | 0.68                                           | 0.00                     | 0.00                           | 0.00                           |                    | 0.00                                |                                 | 0.00                              |                               |
| 172              | 1970 | Zhao Honglin                      | 2               | middle-class peasant     |                       |                        |                       |                         |                                |                           |                           |                                |                                        |                           |                                  | 0.0                    |                                      |                                      |                                         |                                 | 0                                                     | 0.0                                      | 314                        |                                               | 0                                               | 0.53                      | 0                                            | 0                   | #DIV/0!                                      |                                    |                                   | 0                                        | 0.68                                           | 0.00                     | 0.00                           | 0.00                           |                    | 0.00                                |                                 | 0.00                              |                               |
| 173              | 1970 | Yu Jinquan                        | 0               | poor peasant             |                       |                        |                       |                         |                                |                           |                           |                                |                                        |                           |                                  | 0.0                    |                                      |                                      |                                         |                                 | 0                                                     | 0.0                                      | 314                        |                                               | 0                                               | 0.53                      | 0                                            | 0                   | #DIV/0!                                      |                                    |                                   | 0                                        | 0.68                                           | 0.00                     | 0.00                           | 0.00                           |                    | 0.00                                |                                 | 0.00                              |                               |
| 174              | 1970 | Yu Jinliang                       | 0               | poor peasant             |                       |                        |                       |                         |                                |                           |                           |                                |                                        |                           |                                  | 0.0                    |                                      |                                      |                                         |                                 | 0                                                     | 0.0                                      | 314                        |                                               | 0                                               | 0.53                      | 0                                            | 0                   | #DIV/0!                                      |                                    |                                   | 0                                        | 0.68                                           | 0.00                     | 0.00                           | 0.00                           |                    | 0.00                                |                                 | 0.00                              |                               |
| 175              | 1970 | Mu Zhaoxin                        | 2               | poor peasant             |                       |                        |                       |                         | 3                              |                           |                           |                                |                                        | 459.2                     | 44.3                             | 503.5                  | 4.6                                  |                                      |                                         |                                 | 499                                                   | 3.0                                      | 314                        | 942                                           | 499                                             | 0.53                      | 264                                          | 1206                | 402                                          |                                    |                                   | 498.9                                    | 0.68                                           | 339.25                   | 339.25                         | 302.48                         | 36.77              | -13.94                              | 22.83                           |                                   |                               |
| 176              | 1970 | Wang Guijing                      | 0               | poor peasant             |                       |                        |                       |                         |                                |                           |                           |                                |                                        |                           |                                  | 0.0                    |                                      |                                      |                                         |                                 | 0                                                     | 0.0                                      | 314                        |                                               | 0                                               | 0.53                      | 0                                            | 0                   | #DIV/0!                                      |                                    |                                   | 0                                        | 0.68                                           | 0.00                     | 0.00                           | 0.00                           |                    | 0.00                                |                                 | 0.00                              |                               |
| 177              | 1970 | Zhang Xuezhong                    | 1               | low-middle-class peasant |                       |                        |                       |                         | 9                              |                           |                           |                                |                                        | 615.8                     | 129.4                            | 745.2                  | 46.0                                 |                                      |                                         |                                 | 699                                                   | 9.0                                      | 314                        | 2826                                          | 699                                             | 0.53                      | 371                                          | 3197                | 355                                          |                                    |                                   | 699.2                                    | 0.68                                           | 475.46                   | 475.46                         | 607.45                         | -131.99            | -1035.39                            | -1167.38                        |                                   |                               |
| 178              | 1970 | Jia Anji                          | 2               | poor peasant             |                       |                        |                       |                         | 4                              |                           |                           |                                |                                        | 500.1                     | 115.7                            | 615.8                  | 32.2                                 |                                      |                                         |                                 | 584                                                   | 4.0                                      | 314                        | 1256                                          | 584                                             | 0.53                      | 309                                          | 1565                | 391                                          |                                    |                                   | 583.6                                    | 0.68                                           | 396.85                   | 396.85                         | 396.98                         | -0.13              | 89.12                               | 88.99                           |                                   |                               |
| 179              | 1970 | Liu Peishou                       | 1               | middle-class peasant     |                       |                        |                       |                         | 5                              |                           |                           |                                |                                        | 561.5                     | 170.7                            | 732.2                  | 52.9                                 |                                      |                                         |                                 | 679                                                   | 5.0                                      | 314                        | 1570                                          | 679                                             | 0.53                      | 360                                          | 1930                | 386                                          |                                    |                                   | 679.3                                    | 0.68                                           | 461.92                   | 461.92                         | 481.45                         | -19.53             | 246.98                              | 227.45                          |                                   |                               |
| 180              | 1970 | Gao Yunxian                       | 2               | middle-class peasant     |                       |                        |                       |                         | 8                              |                           |                           |                                |                                        | 885.6                     | 205.0                            | 1090.6                 | 69.0                                 |                                      |                                         |                                 | 1022                                                  | 8.0                                      | 314                        | 2512                                          | 1022                                            | 0.53                      | 541                                          | 3053                | 382                                          |                                    |                                   | 1021.6                                   | 0.68                                           | 694.69                   | 694.69                         | 689.94                         | 4.75               | 119.56                              | 124.31                          |                                   |                               |
| 181              | 1970 | Tian Kehua                        | 2               | middle-class peasant     |                       |                        |                       |                         | 1                              |                           |                           |                                |                                        | 112.1                     | 12.0                             | 124.1                  |                                      |                                      |                                         |                                 | 124                                                   | 1.0                                      | 314                        | 314                                           | 124                                             | 0.53                      | 66                                           | 380                 | 380                                          |                                    |                                   | 124.1                                    | 0.68                                           | 84.39                    | 84.39                          | 82.21                          | 2.18               | -49.56                              | -47.38                          |                                   |                               |
| 182              | 1970 | Tian Dawei                        | 1               | middle-class peasant     |                       |                        |                       |                         | 4                              |                           |                           |                                |                                        | 367.7                     | 168.1                            | 535.8                  | 27.6                                 |                                      |                                         |                                 | 508                                                   | 4.0                                      | 314                        | 1256                                          | 508                                             | 0.53                      | 269                                          | 1525                | 381                                          |                                    |                                   | 508.2                                    | 0.68                                           | 345.58                   | 345.58                         | 307.74                         | 37.84              | -214.03                             | -176.19                         |                                   |                               |
| 183              | 1970 | Fan Liyuan                        | 2               | middle-class peasant     |                       |                        |                       |                         | 8                              |                           |                           |                                |                                        | 928.0                     | 286.1                            | 1214.1                 | 66.7                                 |                                      |                                         |                                 | 1147                                                  | 7.8                                      | 314                        | 2460                                          | 1147                                            | 0.53                      | 608                                          | 3068                | 384                                          |                                    |                                   | 1147.4                                   | 0.68                                           | 780.23                   | 780.23                         | 764.51                         | 15.72              | 165.79                              | 181.51                          |                                   |                               |
| 184              | 1970 | Fan Shutang                       | 1               | middle-class peasant     |                       |                        |                       |                         | 6                              |                           |                           |                                |                                        | 429.7                     | 126.1                            | 555.8                  | 27.6                                 |                                      |                                         |                                 | 528                                                   | 6.0                                      | 314                        | 1884                                          | 528                                             | 0.53                      | 280                                          | 2164                | 361                                          |                                    |                                   | 528.2                                    | 0.68                                           | 359.18                   | 359.18                         | 395.46                         | -36.28             | -24.80                              | -61.08                          |                                   |                               |
| 185              | 1970 | Fan Chunxiang                     | 1               | middle-class peasant     |                       |                        |                       |                         | 3                              |                           |                           |                                |                                        | 129.1                     | 42.2                             | 171.3                  | 6.9                                  |                                      |                                         |                                 | 164                                                   | 3.0                                      | 314                        | 942                                           | 164                                             | 0.53                      | 87                                           | 1029                | 343                                          |                                    |                                   | 164.4                                    | 0.68                                           | 111.79                   | 35                             | 146.79                         | 159.38             | -12.59                              | 14.34                           | 1.75                              |                               |
| 186              | 1970 | Lian Huaizhe                      | 2               | poor peasant             |                       |                        |                       |                         | 3                              |                           |                           |                                |                                        | 465.8                     | 67.8                             | 533.6                  | 29.9                                 |                                      |                                         |                                 | 504                                                   | 3.0                                      | 314                        | 942                                           | 504                                             | 0.53                      | 267                                          | 1209                | 403                                          |                                    |                                   | 503.7                                    | 0.68                                           | 342.52                   | 342.52                         | 323.40                         | 19.12              | 2.17                                | 21.29                           |                                   |                               |
| 187              | 1970 | Lian Wenbing                      | 2               | poor peasant             |                       |                        |                       |                         | 4                              |                           |                           |                                |                                        | 494.0                     | 32.7                             | 526.7                  | 27.6                                 |                                      |                                         |                                 | 499                                                   | 4.0                                      | 314                        | 1256                                          | 499                                             | 0.53                      | 265                                          | 1521                | 380                                          |                                    |                                   | 499.1                                    | 0.68                                           | 339.39                   | 339.39                         | 318.11                         | 21.28              | -131.44                             | -110.16                         |                                   |                               |
| 188              | 1970 | Wu Congyi                         | 1               | poor peasant             |                       |                        |                       |                         | 7                              |                           |                           |                                |                                        | 413.1                     | 173.3                            | 586.4                  | 27.6                                 |                                      |                                         |                                 | 559                                                   | 7.0                                      | 314                        | 2198                                          | 559                                             | 0.53                      | 296                                          | 2494                | 356                                          |                                    |                                   | 558.8                                    | 0.68                                           | 379.98                   | 379.98                         | 475.29                         | -95.31             | -454.17                             | -549.48                         |                                   |                               |

(cont.)

| Household number | Year | Name of the head of the household | Production team | Class status (1)           | Basic work points (2) | Total labor forces (3) | Male labor forces (4) | Female labor forces (5) | Total household population (6) | Age: 1 to 3 years old (7) | Age: 4 to 7 years old (8) | Age: 8 years old and above (9) | Work points of grain distribution (10) | Laboring work points (11) | Farmyard manure work points (12) | Total work points (13) | Work points of compulsory labor (14) | Work points of help cultivation (15) | Work points of private plots labor (16) | Total deducted work points (17) | Acutal workdays of participation in distribution (18) | Workpoints for rations distribution (19) | Rations per workpoint (20) | Total rations received form distribution (21) | Workdays of participation in distribu-tion (22) | Grains per workpoint (23) | Total grains distributed by work-points (24) | Grains subsidy (25) | Total Grains received from distribution (26) | Distributed grains per person (27) | Distributed grains per adult (28) | Grains received from privated plots (29) | Workdays of participation in distribution (30) | Value per workpoint (31) | Total value of workpoints (32) | Money used for investment (33) | Sum of income (34) | Money distributed in this year (34) | Deposit/ debt of this year (35) | Deposit/ debt over the years (36) | Accumulated deposit/debt (37) |
|------------------|------|-----------------------------------|-----------------|----------------------------|-----------------------|------------------------|-----------------------|-------------------------|--------------------------------|---------------------------|---------------------------|--------------------------------|----------------------------------------|---------------------------|----------------------------------|------------------------|--------------------------------------|--------------------------------------|-----------------------------------------|---------------------------------|-------------------------------------------------------|------------------------------------------|----------------------------|-----------------------------------------------|-------------------------------------------------|---------------------------|----------------------------------------------|---------------------|----------------------------------------------|------------------------------------|-----------------------------------|------------------------------------------|------------------------------------------------|--------------------------|--------------------------------|--------------------------------|--------------------|-------------------------------------|---------------------------------|-----------------------------------|-------------------------------|
| 189              | 1970 | Wu Laifu                          | 1               | poor peasant               |                       |                        |                       |                         | 6                              |                           |                           |                                |                                        |                           | 428.2                            | 38.2                   | 466.4                                | 27.6                                 |                                         |                                 | 439                                                   | 5.8                                      | 314                        | 1806                                          | 439                                             | 0.53                      | 233                                          |                     | 2039                                         | 340                                |                                   |                                          | 438.8                                          | 0.68                     | 298.38                         |                                | 298.38             | 390.82                              | -92.44                          | -37.01                            | -129.45                       |
| 190              | 1970 | Tian Dayu                         | 2               | poor peasant               |                       |                        |                       |                         | 1                              |                           |                           |                                |                                        |                           | 500.0                            | 5.0                    | 505.0                                | 16.1                                 |                                         |                                 | 489                                                   | 1.0                                      | 314                        | 314                                           | 489                                             | 0.53                      | 259                                          |                     | 573                                          | 573                                |                                   |                                          | 488.9                                          | 0.68                     | 332.45                         |                                | 332.45             | 408.35                              | -75.90                          | 390.96                            | 315.06                        |
| 191              | 1970 | Liu Shuting                       | 2               | poor peasant               |                       |                        |                       |                         | 4                              |                           |                           |                                |                                        |                           | 71.2                             | 45.4                   | 116.6                                | 4.6                                  |                                         |                                 | 112                                                   | 4.0                                      | 314                        | 1256                                          | 112                                             | 0.53                      | 59                                           |                     | 1315                                         | 329                                |                                   |                                          | 112                                            | 0.68                     | 76.16                          | 175                            | 251.16             | 197.98                              | 53.18                           | -30.81                            | 22.37                         |
| 192              | 1970 | Meng Tiande                       | 2               | poor peasant               |                       |                        |                       |                         | 8                              |                           |                           |                                |                                        |                           | 733.2                            | 206.2                  | 939.4                                | 57.5                                 |                                         |                                 | 882                                                   | 8.0                                      | 314                        | 2512                                          | 882                                             | 0.53                      | 467                                          |                     | 2979                                         | 372                                |                                   |                                          | 881.9                                          | 0.68                     | 599.69                         |                                | 599.69             | 584.75                              | 14.94                           | -285.11                           | -270.17                       |
| 193              | 1970 | Meng Xiulian                      | 2               | poor peasant               |                       |                        |                       |                         |                                |                           |                           |                                |                                        |                           |                                  |                        | 0.0                                  |                                      |                                         |                                 | 0                                                     | 0.0                                      | 314                        |                                               | 0                                               | 0.53                      | 0                                            |                     | 0                                            | #DIV/0!                            |                                   |                                          | 0                                              | 0.68                     | 0.00                           |                                | 0.00               |                                     | 0.00                            |                                   | 0.00                          |
| 194              | 1970 | Tian Genlong                      | 2               | poor peasant               |                       |                        |                       |                         | 6                              |                           |                           |                                |                                        |                           | 373.5                            | 143.8                  | 517.3                                | 27.6                                 |                                         |                                 | 490                                                   | 5.9                                      | 314                        | 1858                                          | 490                                             | 0.53                      | 260                                          |                     | 2118                                         | 353                                |                                   |                                          | 489.7                                          | 0.68                     | 333.00                         |                                | 333.00             | 399.84                              | -66.84                          | -279.69                           | -346.53                       |
| 195              | 1970 | Zhao Jinlan                       | 2               | poor peasant               |                       |                        |                       |                         | 5                              |                           |                           |                                |                                        |                           | 3.1                              | 56.3                   | 59.4                                 | 4.6                                  |                                         |                                 | 55                                                    | 4.8                                      | 314                        | 1518                                          | 55                                              | 0.53                      | 29                                           |                     | 1547                                         | 309                                |                                   |                                          | 54.8                                           | 0.68                     | 37.26                          | 213                            | 250.26             | 235.02                              | 15.24                           | -12.54                            | 2.70                          |
| 196              | 1970 | Liu Peiren                        | 2               | middle-class peasant       |                       |                        |                       |                         | 4                              |                           |                           |                                |                                        |                           | 398.0                            | 113.1                  | 511.1                                | 27.6                                 |                                         |                                 | 484                                                   | 4.0                                      | 314                        | 1256                                          | 484                                             | 0.53                      | 256                                          |                     | 1512                                         | 378                                |                                   |                                          | 483.5                                          | 0.68                     | 328.78                         |                                | 328.78             | 310.69                              | 18.09                           | 31.75                             | 49.84                         |
| 197              | 1970 | Liu Peizhu                        | 2               | middle-class peasant       |                       |                        |                       |                         | 2                              |                           |                           |                                |                                        |                           | 369.9                            | 11.0                   | 380.9                                | 27.6                                 |                                         |                                 | 353                                                   | 2.0                                      | 314                        | 628                                           | 353                                             | 0.53                      | 187                                          |                     | 815                                          | 408                                |                                   |                                          | 353.3                                          | 0.68                     | 240.24                         |                                | 240.24             | 251.47                              | -11.23                          | 57.57                             | 46.34                         |
| 198              | 1970 | Liu Peijie                        | 2               | middle-class peasant       |                       |                        |                       |                         | 5                              |                           |                           |                                |                                        |                           | 582.0                            | 77.3                   | 659.3                                | 43.7                                 |                                         |                                 | 616                                                   | 4.8                                      | 314                        | 1492                                          | 616                                             | 0.53                      | 326                                          |                     | 1818                                         | 364                                |                                   |                                          | 615.6                                          | 0.68                     | 418.61                         |                                | 418.61             | 449.63                              | -31.02                          | 117.56                            | 86.54                         |
| 199              | 1970 | Meng Guilan                       | 2               | poor peasant               |                       |                        |                       |                         | 4                              |                           |                           |                                |                                        |                           | 53.9                             | 56.5                   | 110.4                                | 4.6                                  |                                         |                                 | 106                                                   | 4.0                                      | 314                        | 1256                                          | 106                                             | 0.53                      | 56                                           |                     | 1312                                         | 328                                |                                   |                                          | 105.8                                          | 0.68                     | 71.94                          | 133                            | 204.94             | 196.57                              | 8.37                            | -44.51                            | -36.14                        |
| 200              | 1970 | Wang Lianxiang                    | 2               | poor peasant               |                       |                        |                       |                         | 2                              |                           |                           |                                |                                        |                           | 209.7                            | 24.5                   | 234.2                                | 9.2                                  |                                         |                                 | 225                                                   | 2.0                                      | 314                        | 628                                           | 225                                             | 0.53                      | 119                                          |                     | 747                                          | 374                                |                                   |                                          | 225                                            | 0.68                     | 153.00                         | 20                             | 173.00             | 110.45                              | 62.55                           | 2.76                              | 65.31                         |
| 201              | 1970 | Wang Ende                         | 2               | poor peasant               |                       |                        |                       |                         | 2                              |                           |                           |                                |                                        |                           | 283.4                            | 31.5                   | 314.9                                | 6.9                                  |                                         |                                 | 308                                                   | 2.0                                      | 314                        | 628                                           | 308                                             | 0.53                      | 163                                          |                     | 791                                          | 396                                |                                   |                                          | 308                                            | 0.68                     | 209.44                         |                                | 209.44             | 214.53                              | -5.09                           | 119.88                            | 114.79                        |
| 202              | 1970 | Meng Mingqing                     | 2               | low-middle-class peasant   |                       |                        |                       |                         | 2                              |                           |                           |                                |                                        |                           | 334.4                            | 125.4                  | 459.8                                | 18.4                                 |                                         |                                 | 441                                                   | 2.0                                      | 314                        | 628                                           | 441                                             | 0.53                      | 234                                          |                     | 862                                          | 431                                |                                   |                                          | 441.4                                          | 0.68                     | 300.15                         |                                | 300.15             | 312.36                              | -12.21                          | 246.81                            | 234.60                        |
| 203              | 1970 | Meng Tianseng                     | 2               | low-middle-class peasant   |                       |                        |                       |                         | 3                              |                           |                           |                                |                                        |                           | 591.9                            |                        | 591.9                                | 9.2                                  |                                         |                                 | 583                                                   | 3.0                                      | 314                        | 942                                           | 583                                             | 0.53                      | 309                                          |                     | 1251                                         | 417                                |                                   |                                          | 582.7                                          | 0.68                     | 396.24                         |                                | 396.24             | 396.95                              | -0.71                           | 93.36                             | 92.65                         |
| 204              | 1970 | Wang Yueming                      | 2               | poor peasant               |                       |                        |                       |                         | 9                              |                           |                           |                                |                                        |                           | 267.7                            | 180.6                  | 448.3                                | 27.6                                 |                                         |                                 | 421                                                   | 9.0                                      | 314                        | 2826                                          | 421                                             | 0.53                      | 223                                          |                     | 3049                                         | 339                                |                                   |                                          | 420.7                                          | 0.68                     | 286.08                         | 185                            | 471.08             | 449.65                              | 21.43                           | 15.98                             | 37.41                         |
| 205              | 1970 | Wang Heshun                       | 2               | poor peasant               |                       |                        |                       |                         | 6                              |                           |                           |                                |                                        |                           | 733.5                            | 159.9                  | 893.4                                | 29.9                                 |                                         |                                 | 864                                                   | 6.0                                      | 314                        | 1884                                          | 864                                             | 0.53                      | 458                                          |                     | 2342                                         | 390                                |                                   |                                          | 863.5                                          | 0.68                     | 587.18                         |                                | 587.18             | 673.13                              | -85.95                          | 287.96                            | 202.01                        |
| 206              | 1970 | Wen Yingjie                       | 2               | upper-middle-class peasant |                       |                        |                       |                         | 4                              |                           |                           |                                |                                        |                           | 559.7                            | 87.3                   | 647.0                                | 36.8                                 |                                         |                                 | 610                                                   | 4.0                                      | 314                        | 1256                                          | 610                                             | 0.53                      | 323                                          |                     | 1579                                         | 395                                |                                   |                                          | 610.2                                          | 0.68                     | 414.94                         |                                | 414.94             | 486.34                              | -71.40                          | 150.72                            | 79.32                         |
| 207              | 1970 | Liu Peiqian                       | 2               | low-middle-class peasant   |                       |                        |                       |                         | 9                              |                           |                           |                                |                                        |                           | 1367.3                           | 359.2                  | 1726.5                               | 87.4                                 |                                         |                                 | 1639                                                  | 9.0                                      | 314                        | 2826                                          | 1639                                            | 0.53                      | 869                                          |                     | 3695                                         | 411                                |                                   |                                          | 1639.1                                         | 0.68                     | 1114.59                        |                                | 1114.59            | 887.53                              | 227.06                          | 109.56                            | 336.62                        |
| 208              | 1970 | Liu Zhaoji                        | 2               | low-middle-class peasant   |                       |                        |                       |                         | 3                              |                           |                           |                                |                                        |                           | 352.4                            | 65.8                   | 418.2                                | 39.1                                 |                                         |                                 | 379                                                   | 3.0                                      | 314                        | 942                                           | 379                                             | 0.53                      | 201                                          |                     | 1143                                         | 381                                |                                   |                                          | 379.1                                          | 0.68                     | 257.79                         |                                | 257.79             | 273.89                              | -16.10                          | 40.04                             | 23.94                         |
| 209              | 1970 | Yu Shengliang                     | 2               | poor peasant               |                       |                        |                       |                         | 3                              |                           |                           |                                |                                        |                           | 281.0                            | 71.9                   | 352.9                                | 18.4                                 |                                         |                                 | 335                                                   | 3.0                                      | 314                        | 942                                           | 335                                             | 0.53                      | 177                                          |                     | 1119                                         | 373                                |                                   |                                          | 334.5                                          | 0.68                     | 227.46                         |                                | 227.46             | 215.71                              | 11.75                           | -21.59                            | -9.84                         |
| 210              | 1970 | Meng Tianyou                      | 1               | poor peasant               |                       |                        |                       |                         | 1                              |                           |                           |                                |                                        |                           | 190.1                            | 5.0                    | 195.1                                | 9.2                                  |                                         |                                 | 186                                                   | 1.0                                      | 314                        | 314                                           | 186                                             | 0.53                      | 99                                           |                     | 413                                          | 413                                |                                   |                                          | 185.9                                          | 0.68                     | 126.41                         |                                | 126.41             | 129.26                              | -2.85                           | 87.01                             | 84.16                         |
| 211              | 1970 | Meng Tianfu                       | 2               | middle-class peasant       |                       |                        |                       |                         | 8                              |                           |                           |                                |                                        |                           | 741.8                            | 249.6                  | 991.4                                | 52.9                                 |                                         |                                 | 939                                                   | 7.7                                      | 314                        | 2408                                          | 939                                             | 0.53                      | 497                                          |                     | 2905                                         | 363                                |                                   |                                          | 938.5                                          | 0.68                     | 638.18                         |                                | 638.18             | 530.35                              | 107.83                          | -72.11                            | 35.72                         |

(cont.)

| Household number | Year | Name of the head of the household | Production team | Class status (1)         | Basic work points (2) | Total labor forces (3) | Male labor forces (4) | Female labor forces (5) | Total household population (6) | Age: 1 to 3 years old (7) | Age: 4 to 7 years old (8) | Age: 8 years old and above (9) | Work points of grain distribution (10) | Laboring work points (11) | Farmyard manure work points (12) | Total work points (13) | Work points of compulsory labor (14) | Work points of help cultivation (15) | Work points of private plots labor (16) | Total deducted work points (17) | Actual workdays of participation in distribution (18) | Workpoints for rations distribution (19) | Rations per workpoint (20) | Total rations received from distribution (21) | Workdays of participation in distribution (22) | Grains per workpoint (23) | Total grains distributed by work-points (24) | Grains subsidy (25) | Total Grains received from distribution (26) | Distributed grains per person (27) | Distributed grains per adult (28) | Grains received from private plots (29) | Workdays of participation in distribution (30) | Value per workpoint (31) | Total value of workpoints (32) | Money used for investment (33) | Sum of income (34) | Money distributed in this year (34) | Deposit/debt of this year (35) | Deposit/debt over the years (36) | Accumulated deposit/debt (37) |
|------------------|------|-----------------------------------|-----------------|--------------------------|-----------------------|------------------------|-----------------------|-------------------------|--------------------------------|---------------------------|---------------------------|--------------------------------|----------------------------------------|---------------------------|----------------------------------|------------------------|--------------------------------------|--------------------------------------|-----------------------------------------|---------------------------------|-------------------------------------------------------|------------------------------------------|----------------------------|-----------------------------------------------|------------------------------------------------|---------------------------|----------------------------------------------|---------------------|----------------------------------------------|------------------------------------|-----------------------------------|-----------------------------------------|------------------------------------------------|--------------------------|--------------------------------|--------------------------------|--------------------|-------------------------------------|--------------------------------|----------------------------------|-------------------------------|
| 212              | 1970 | Meng Xisheng                      | 2               | middle-class peasant     |                       |                        |                       |                         | 4                              |                           |                           |                                |                                        |                           | 413.5                            | 106.6                  | 520.1                                | 27.6                                 |                                         |                                 | 493                                                   | 4.0                                      | 314                        | 1256                                          | 493                                            | 0.53                      | 261                                          |                     | 1517                                         | 379                                |                                   |                                         | 492.5                                          | 0.68                     | 334.90                         |                                | 334.90             | 318.23                              | 16.67                          | 42.36                            | 59.03                         |
| 213              | 1970 | Gui Tiankuan                      | 1               | poor peasant             |                       |                        |                       |                         | 9                              |                           |                           |                                |                                        |                           | 1449.3                           | 143.6                  | 1592.9                               | 89.7                                 |                                         |                                 | 1503                                                  | 9.0                                      | 314                        | 2826                                          | 1503                                           | 0.53                      | 797                                          |                     | 3623                                         | 403                                |                                   |                                         | 1503.2                                         | 0.68                     | 1022.18                        |                                | 1022.18            | 769.02                              | 253.16                         | 123.97                           | 377.13                        |
| 214              | 1970 | Kang Huaizhi                      | 2               | poor peasant             |                       |                        |                       |                         | 7                              |                           |                           |                                |                                        |                           | 430.4                            | 69.8                   | 500.2                                | 27.6                                 |                                         |                                 | 473                                                   | 7.0                                      | 314                        | 2198                                          | 473                                            | 0.53                      | 250                                          |                     | 2448                                         | 350                                |                                   |                                         | 472.6                                          | 0.68                     | 321.37                         |                                | 321.37             | 453.39                              | -132.02                        | -1090.76                         | -1222.78                      |
| 215              | 1970 | Liu Huaiqing                      | 2               | poor peasant             |                       |                        |                       |                         | 6                              |                           |                           |                                |                                        |                           | 432.0                            | 66.2                   | 498.2                                | 23.0                                 |                                         |                                 | 475                                                   | 6.0                                      | 314                        | 1884                                          | 475                                            | 0.53                      | 252                                          |                     | 2136                                         | 356                                |                                   |                                         | 475.2                                          | 0.68                     | 323.14                         | 87                             | 410.14             | 335.04                              | 75.10                          | 50.05                            | 125.15                        |
| 216              | 1970 | Meng Xiuying                      | 2               | poor peasant             |                       |                        |                       |                         | 4                              |                           |                           |                                |                                        |                           | 477.5                            | 51.0                   | 528.5                                | 11.5                                 |                                         |                                 | 517                                                   | 3.8                                      | 314                        | 1178                                          | 517                                            | 0.53                      | 274                                          |                     | 1452                                         | 363                                |                                   |                                         | 517                                            | 0.68                     | 351.56                         |                                | 351.56             | 360.28                              | -8.72                          | 41.67                            | 32.95                         |
| 217              | 1970 | Meng Peiliang                     | 2               | middle-class peasant     |                       |                        |                       |                         | 9                              |                           |                           |                                |                                        |                           | 1150.0                           | 292.4                  | 1442.4                               | 98.9                                 |                                         |                                 | 1344                                                  | 9.0                                      | 314                        | 2826                                          | 1344                                           | 0.53                      | 712                                          |                     | 3538                                         | 393                                |                                   |                                         | 1343.5                                         | 0.68                     | 913.58                         |                                | 913.58             | 720.98                              | 192.60                         | -92.23                           | 100.37                        |
| 218              | 1970 | Meng Mingcheng                    | 2               | middle-class peasant     |                       |                        |                       |                         | 4                              |                           |                           |                                |                                        |                           | 525.5                            | 123.5                  | 649.0                                | 34.5                                 |                                         |                                 | 615                                                   | 4.0                                      | 314                        | 1256                                          | 615                                            | 0.53                      | 326                                          |                     | 1582                                         | 395                                |                                   |                                         | 614.5                                          | 0.68                     | 417.86                         |                                | 417.86             | 350.85                              | 67.01                          | -322.60                          | -255.59                       |
| 219              | 1970 | Wu Shi'en                         | 1               | poor peasant             |                       |                        |                       |                         | 5                              |                           |                           |                                |                                        |                           | 456.1                            | 150.2                  | 606.3                                | 29.9                                 |                                         |                                 | 576                                                   | 5.0                                      | 314                        | 1570                                          | 576                                            | 0.53                      | 305                                          |                     | 1875                                         | 375                                |                                   |                                         | 576.4                                          | 0.68                     | 391.95                         |                                | 391.95             | 353.00                              | 38.95                          | -202.52                          | -163.57                       |
| 220              | 1970 | Wang Qingwen                      | 1               | poor peasant             |                       |                        |                       |                         | 4                              |                           |                           |                                |                                        |                           | 656.5                            | 172.4                  | 828.9                                | 32.2                                 |                                         |                                 | 797                                                   | 4.0                                      | 314                        | 1256                                          | 797                                            | 0.53                      | 422                                          |                     | 1678                                         | 420                                |                                   |                                         | 796.7                                          | 0.68                     | 541.76                         |                                | 541.76             | 443.50                              | 98.26                          | 108.58                           | 206.84                        |
| 221              | 1970 | Ji Chunmei                        | 1               | poor peasant             |                       |                        |                       |                         | 1                              |                           |                           |                                |                                        |                           |                                  |                        | 0.0                                  |                                      |                                         |                                 | 0                                                     | 1.0                                      | 314                        | 314                                           | 0                                              | 0.53                      | 0                                            |                     | 314                                          | 314                                |                                   |                                         | 0                                              | 0.68                     | 0.00                           |                                | 0.00               | 70.48                               | -70.48                         | -206.09                          | -276.57                       |
| 222              | 1970 | Li Yushu                          | 1               | poor peasant             |                       |                        |                       |                         | 4                              |                           |                           |                                |                                        |                           | 480.3                            | 201.4                  | 681.7                                | 23.0                                 |                                         |                                 | 659                                                   | 4.0                                      | 314                        | 1256                                          | 659                                            | 0.53                      | 349                                          |                     | 1605                                         | 401                                |                                   |                                         | 658.7                                          | 0.68                     | 447.92                         |                                | 447.92             | 364.92                              | 83.00                          | 10.37                            | 93.37                         |
| 223              | 1970 | Yu Zhenji                         | 2               | poor peasant             |                       |                        |                       |                         | 1                              |                           |                           |                                |                                        |                           | 228.1                            | 5.0                    | 233.1                                | 23.0                                 |                                         |                                 | 210                                                   | 1.0                                      | 314                        | 314                                           | 210                                            | 0.53                      | 111                                          |                     | 425                                          | 425                                |                                   |                                         | 210.1                                          | 0.68                     | 142.87                         |                                | 142.87             | 259.24                              | -116.37                        | 101.58                           | -14.79                        |
| 224              | 1970 | Meng Jinxi                        | 0               | poor peasant             |                       |                        |                       |                         | 1                              |                           |                           |                                |                                        |                           |                                  | 5.0                    | 5.0                                  |                                      |                                         |                                 | 5                                                     | 1.0                                      | 314                        | 314                                           | 5                                              | 0.53                      | 3                                            |                     | 317                                          | 317                                |                                   |                                         | 5                                              | 0.68                     | 3.40                           |                                | 3.40               | 82.39                               | -78.99                         | -353.98                          | -432.97                       |
| 225              | 1970 | Li Guangkai                       | 1               | poor peasant             |                       |                        |                       |                         | 1                              |                           |                           |                                |                                        |                           | 240.1                            | 5.0                    | 245.1                                | 9.2                                  |                                         |                                 | 236                                                   | 1.0                                      | 314                        | 314                                           | 236                                            | 0.53                      | 125                                          |                     | 439                                          | 439                                |                                   |                                         | 235.9                                          | 0.68                     | 160.41                         |                                | 160.41             | 190.46                              | -30.05                         | 159.72                           | 129.67                        |
| 226              | 1970 | Liu Jigeng                        | 2               | poor peasant             |                       |                        |                       |                         | 7                              |                           |                           |                                |                                        |                           | 1046.5                           | 140.5                  | 1187.0                               | 34.5                                 |                                         |                                 | 1153                                                  | 7.0                                      | 314                        | 2198                                          | 1153                                           | 0.53                      | 611                                          |                     | 2809                                         | 401                                |                                   |                                         | 1152.5                                         | 0.68                     | 783.70                         |                                | 783.70             | 834.20                              | -50.50                         | 559.47                           | 508.97                        |
| 227              | 1970 | Fan Shuzhi                        | 1               | middle-class peasant     |                       |                        |                       |                         | 5                              |                           |                           |                                |                                        |                           | 426.0                            | 76.8                   | 502.8                                | 27.6                                 |                                         |                                 | 475                                                   | 5.0                                      | 314                        | 1570                                          | 475                                            | 0.53                      | 252                                          |                     | 1822                                         | 364                                |                                   |                                         | 475.2                                          | 0.68                     | 323.14                         |                                | 323.14             | 337.63                              | -14.49                         | -135.26                          | -149.75                       |
| 228              | 1970 | Ji Guanglian                      | 1               | low-middle-class peasant |                       |                        |                       |                         |                                |                           |                           |                                |                                        |                           |                                  |                        | 0.0                                  |                                      |                                         |                                 | 0                                                     | 0.0                                      | 314                        |                                               | 0                                              | 0.53                      | 0                                            |                     | 0                                            |                                    | #DIV/o!                           |                                         | 0                                              | 0.68                     | 0.00                           |                                | 0.00               |                                     | 0.00                           |                                  | 0.00                          |
| 229              | 1970 | Yang Xiaozhong                    | 1               | low-middle-class peasant |                       |                        |                       |                         |                                |                           |                           |                                |                                        |                           |                                  |                        | 0.0                                  |                                      |                                         |                                 | 0                                                     | 0.0                                      | 314                        |                                               | 0                                              | 0.53                      | 0                                            |                     | 0                                            |                                    | #DIV/o!                           |                                         | 0                                              | 0.68                     | 0.00                           |                                | 0.00               |                                     | 0.00                           |                                  | 0.00                          |
| 230              | 1970 | Meng Minghong                     | 2               | middle-class peasant     |                       |                        |                       |                         |                                |                           |                           |                                |                                        |                           |                                  |                        | 0.0                                  |                                      |                                         |                                 | 0                                                     | 0.0                                      | 314                        |                                               | 0                                              | 0.53                      | 0                                            |                     | 0                                            |                                    | #DIV/o!                           |                                         | 0                                              | 0.68                     | 0.00                           |                                | 0.00               |                                     | 0.00                           |                                  | 0.00                          |
| 231              | 1970 | Zhang Xuewen                      | 0               | poor peasant             |                       |                        |                       |                         |                                |                           |                           |                                |                                        |                           |                                  |                        | 0.0                                  |                                      |                                         |                                 | 0                                                     | 0.0                                      | 314                        |                                               | 0                                              | 0.53                      | 0                                            |                     | 0                                            |                                    | #DIV/o!                           |                                         | 0                                              | 0.68                     | 0.00                           |                                | 0.00               |                                     | 0.00                           |                                  | 0.00                          |
| 232              | 1970 | Wu Jingxiu                        | 0               | middle-class peasant     |                       |                        |                       |                         | 5                              |                           |                           |                                |                                        |                           | 3.7                              | 60.2                   | 63.9                                 | 4.6                                  |                                         |                                 | 59                                                    | 4.8                                      | 314                        | 1518                                          | 59                                             | 0.53                      | 31                                           |                     | 1549                                         | 310                                |                                   |                                         | 59.3                                           | 0.68                     | 40.32                          |                                | 40.32              |                                     | 40.32                          |                                  | 40.32                         |
| 233              | 1970 | Fan Shugen                        | 2               | middle-class peasant     |                       |                        |                       |                         |                                |                           |                           |                                |                                        |                           |                                  |                        | 0.0                                  |                                      |                                         |                                 | 0                                                     | 0.0                                      | 314                        |                                               | 0                                              | 0.53                      | 0                                            |                     | 0                                            |                                    | #DIV/o!                           |                                         | 0                                              | 0.68                     | 0.00                           |                                | 0.00               |                                     | 0.00                           |                                  | 0.00                          |
| 234              | 1970 | Yang Xiaoheng                     | 1               |                          |                       |                        |                       |                         |                                |                           |                           |                                |                                        |                           |                                  |                        | 0.0                                  |                                      |                                         |                                 | 0                                                     | 0.0                                      | 314                        |                                               | 0                                              | 0.53                      | 0                                            |                     | 0                                            |                                    | #DIV/o!                           |                                         | 0                                              | 0.68                     | 0.00                           |                                | 0.00               |                                     | 0.00                           |                                  | 0.00                          |

(cont.)

| Household number | Year | Name of the head of the household | Production team | Class status (1)         | Basic work points (2) | Total labor forces (3) | Male labor forces (4) | Female labor forces (5) | Total household population (6) | Age: 1 to 3 years old (7) | Age: 4 to 7 years old (8) | Age: 8 years old and above (9) | Work points of grain distribution (10) | Laboring work points (11) | Farmyard manure work points (12) | Total work points (13) | Work points of compulsory labor (14) | Work points of help cultivation (15) | Work points of private plots labor (16) | Total deducted work points (17) | Acutal workdays of participation in distribution (18) | Workpoints for rations distribution (19) | Rations per workpoint (20) | Total rations received form distribution (21) | Workdays of participation in distribu- tion (22) | Grains per workpoint (23) | Total grains distributed by work- points (24) | Grains subsidy (25) | Total Grains received from distribution (26) | Distributed grains per person (27) | Distributed grains per adult (28) | Grains received from privated plots (29) | Workdays of participation in distribution (30) | Value per workpoint (31) | Total value of workpoints (32) | Money used for investment (33) | Sum of income (34) | Money distributed in this year (34) | Deposit/ debt of this year (35) | Deposit/ debt over the years (36) | Accumulated deposit/debt (37) |        |
|------------------|------|-----------------------------------|-----------------|--------------------------|-----------------------|------------------------|-----------------------|-------------------------|--------------------------------|---------------------------|---------------------------|--------------------------------|----------------------------------------|---------------------------|----------------------------------|------------------------|--------------------------------------|--------------------------------------|-----------------------------------------|---------------------------------|-------------------------------------------------------|------------------------------------------|----------------------------|-----------------------------------------------|--------------------------------------------------|---------------------------|-----------------------------------------------|---------------------|----------------------------------------------|------------------------------------|-----------------------------------|------------------------------------------|------------------------------------------------|--------------------------|--------------------------------|--------------------------------|--------------------|-------------------------------------|---------------------------------|-----------------------------------|-------------------------------|--------|
| 235              | 1970 | Fan Xuewen                        | 1               |                          |                       |                        |                       |                         |                                |                           |                           |                                |                                        |                           |                                  | 0.0                    |                                      |                                      |                                         |                                 | 0                                                     | 0.0                                      | 314                        |                                               | 0                                                | 0.53                      | 0                                             |                     | 0                                            | #DIV/o!                            |                                   |                                          | 0                                              | 0.68                     | 0.00                           |                                | 0.00               |                                     | 0.00                            |                                   | 0.00                          |        |
| 236              | 1970 | Liu Yuzhen                        | 1               |                          |                       |                        |                       |                         |                                |                           |                           |                                |                                        | 739.0                     |                                  |                        | 739.0                                |                                      |                                         |                                 | 739                                                   | 0.0                                      | 314                        |                                               | 739                                              | 0.53                      | 392                                           |                     | 392                                          | #DIV/o!                            |                                   |                                          | 739                                            | 0.68                     | 502.52                         |                                | 502.52             | 482.00                              | 20.52                           | 69.63                             | 90.15                         |        |
| 237              | 1970 | Mu Chuncui                        | 1               | poor peasant             |                       |                        |                       |                         |                                |                           |                           |                                |                                        |                           | 5.0                              | 5.0                    |                                      |                                      |                                         |                                 | 5                                                     | 0.0                                      | 314                        |                                               | 5                                                | 0.53                      | 3                                             |                     | 3                                            | #DIV/o!                            |                                   |                                          | 5                                              | 0.68                     | 3.40                           | 32                             | 35.40              | 14.28                               | 21.12                           | -156.74                           | -135.62                       |        |
| 238              | 1970 | Meng Mingliang                    | 2               | poor peasant             |                       |                        |                       |                         | 1                              |                           |                           |                                |                                        | 280.5                     | 3.5                              | 284.0                  | 16.1                                 |                                      |                                         |                                 | 268                                                   | 1.0                                      | 314                        |                                               | 314                                              | 0.53                      | 142                                           |                     | 456                                          | 456                                |                                   |                                          | 267.9                                          | 0.68                     | 182.17                         |                                | 182.17             | 174.99                              | 7.18                            | 131.57                            | 138.75                        |        |
| 239              | 1970 | Wang Guilan                       | 1               | poor peasant             |                       |                        |                       |                         | 1                              |                           |                           |                                |                                        | 58.5                      | 19.4                             | 77.9                   |                                      |                                      |                                         |                                 | 78                                                    | 1.0                                      | 314                        |                                               | 314                                              | 0.53                      | 41                                            |                     | 355                                          | 355                                |                                   |                                          | 77.9                                           | 0.68                     | 52.97                          |                                | 52.97              | 82.27                               | -29.30                          | 75.02                             | 45.72                         |        |
| 240              | 1970 | Wang Chuanxian                    | 1               | poor peasant             |                       |                        |                       |                         |                                |                           |                           |                                |                                        |                           |                                  | 0.0                    |                                      |                                      |                                         |                                 | 0                                                     | 0.0                                      | 314                        |                                               | 0                                                | 0.53                      | 0                                             |                     | 0                                            | #DIV/o!                            |                                   |                                          | 0                                              | 0.68                     | 0.00                           |                                | 0.00               |                                     | 0.00                            |                                   | 0.00                          |        |
| 241              | 1970 | Wang Zhenquan                     | 1               | poor peasant             |                       |                        |                       |                         |                                |                           |                           |                                |                                        |                           |                                  | 0.0                    |                                      |                                      |                                         |                                 | 0                                                     | 0.0                                      | 314                        |                                               | 0                                                | 0.53                      | 0                                             |                     | 0                                            | #DIV/o!                            |                                   |                                          | 0                                              | 0.68                     | 0.00                           |                                | 0.00               |                                     | 0.00                            |                                   | 0.00                          |        |
| 243              | 1970 | Li Xiuying                        | 1               | poor peasant             |                       |                        |                       |                         |                                |                           |                           |                                |                                        |                           |                                  | 0.0                    |                                      |                                      |                                         |                                 | 0                                                     | 0.0                                      | 314                        |                                               | 0                                                | 0.53                      | 0                                             |                     | 0                                            | #DIV/o!                            |                                   |                                          | 0                                              | 0.68                     | 0.00                           |                                | 0.00               |                                     | 0.00                            |                                   | 0.00                          |        |
| 244              | 1970 | Meng Jingxi                       | 1               | poor peasant             |                       |                        |                       |                         |                                |                           |                           |                                |                                        |                           |                                  | 0.0                    |                                      |                                      |                                         |                                 | 0                                                     | 0.0                                      | 314                        |                                               | 0                                                | 0.53                      | 0                                             |                     | 0                                            | #DIV/o!                            |                                   |                                          | 0                                              | 0.68                     | 0.00                           |                                | 0.00               |                                     | 0.00                            |                                   | 0.00                          |        |
| 245              | 1970 | Cao Jinren                        | 1               | poor peasant             |                       |                        |                       |                         |                                |                           |                           |                                |                                        |                           |                                  | 0.0                    |                                      |                                      |                                         |                                 | 0                                                     | 0.0                                      | 314                        |                                               | 0                                                | 0.53                      | 0                                             |                     | 0                                            | #DIV/o!                            |                                   |                                          | 0                                              | 0.68                     | 0.00                           |                                | 0.00               |                                     | 0.00                            |                                   | 0.00                          |        |
| 247              | 1970 | Wu Jinggui                        | 1               | poor peasant             |                       |                        |                       |                         |                                |                           |                           |                                |                                        |                           |                                  | 0.0                    |                                      |                                      |                                         |                                 | 0                                                     | 0.0                                      | 314                        |                                               | 0                                                | 0.53                      | 0                                             |                     | 0                                            | #DIV/o!                            |                                   |                                          | 0                                              | 0.68                     | 0.00                           |                                | 0.00               |                                     | 0.00                            |                                   | 0.00                          |        |
| 248              | 1970 | Zhang Yucang                      | 1               |                          |                       |                        |                       |                         |                                |                           |                           |                                |                                        |                           |                                  | 0.0                    |                                      |                                      |                                         |                                 | 0                                                     | 0.0                                      | 314                        |                                               | 0                                                | 0.53                      | 0                                             |                     | 0                                            | #DIV/o!                            |                                   |                                          | 0                                              | 0.68                     | 0.00                           |                                | 0.00               |                                     | 0.00                            |                                   | 0.00                          |        |
| 249              | 1970 | Zhang Lirong                      | 2               | poor peasant             |                       |                        |                       |                         |                                |                           |                           |                                |                                        |                           |                                  | 0.0                    |                                      |                                      |                                         |                                 | 0                                                     | 0.0                                      | 314                        |                                               | 0                                                | 0.53                      | 0                                             |                     | 0                                            | #DIV/o!                            |                                   |                                          | 0                                              | 0.68                     | 0.00                           |                                | 0.00               |                                     | 0.00                            |                                   | 0.00                          |        |
| 250              | 1970 | Zhang Liwen                       | 2               | poor peasant             |                       |                        |                       |                         |                                |                           |                           |                                |                                        |                           |                                  | 0.0                    |                                      |                                      |                                         |                                 | 0                                                     | 0.0                                      | 314                        |                                               | 0                                                | 0.53                      | 0                                             |                     | 0                                            | #DIV/o!                            |                                   |                                          | 0                                              | 0.68                     | 0.00                           |                                | 0.00               |                                     | 0.00                            |                                   | 0.00                          |        |
| 251              | 1970 | Liu Ning                          | 2               |                          |                       |                        |                       |                         |                                |                           |                           |                                |                                        |                           |                                  | 0.0                    |                                      |                                      |                                         |                                 | 0                                                     | 0.0                                      | 314                        |                                               | 0                                                | 0.53                      | 0                                             |                     | 0                                            | #DIV/o!                            |                                   |                                          | 0                                              | 0.68                     | 0.00                           |                                | 0.00               |                                     | 0.00                            |                                   | 0.00                          |        |
| 252              | 1970 | Niu Lanmei                        | 2               | poor peasant             |                       |                        |                       |                         |                                |                           |                           |                                |                                        |                           |                                  | 0.0                    |                                      |                                      |                                         |                                 | 0                                                     | 0.0                                      | 314                        |                                               | 0                                                | 0.53                      | 0                                             |                     | 0                                            | #DIV/o!                            |                                   |                                          | 0                                              | 0.68                     | 0.00                           |                                | 0.00               |                                     | 0.00                            |                                   | 0.00                          |        |
| 253              | 1970 | Meng Minglu                       | 2               | low-middle-class peasant |                       |                        |                       |                         | 6                              |                           |                           |                                |                                        | 1143.6                    | 167.0                            | 1310.6                 | 96.6                                 |                                      |                                         |                                 | 1214                                                  | 6.0                                      | 314                        |                                               | 1884                                             | 1214                      | 0.53                                          | 643                 |                                              | 2527                               | 421                               |                                          |                                                | 1214                     | 0.68                           | 825.52                         |                    | 825.52                              | 750.90                          | 74.62                             | 400.12                        | 474.74 |
| 256              | 1970 | Cui Yongfu                        | 2               | poor peasant             |                       |                        |                       |                         |                                |                           |                           |                                |                                        |                           |                                  | 0.0                    |                                      |                                      |                                         |                                 | 0                                                     | 0.0                                      | 314                        |                                               | 0                                                | 0.53                      | 0                                             |                     | 0                                            | #DIV/o!                            |                                   |                                          | 0                                              | 0.68                     | 0.00                           |                                | 0.00               |                                     | 0.00                            |                                   | 0.00                          |        |
| 257              | 1970 | An Guobao                         | 1               | teacher                  |                       |                        |                       |                         |                                |                           |                           |                                |                                        |                           |                                  | 0.0                    |                                      |                                      |                                         |                                 | 0                                                     | 0.0                                      | 314                        |                                               | 0                                                | 0.53                      | 0                                             |                     | 0                                            | #DIV/o!                            |                                   |                                          | 0                                              | 0.68                     | 0.00                           |                                | 0.00               |                                     | 0.00                            |                                   | 0.00                          |        |
| 258              | 1970 | Liang Guangsheng                  |                 | teacher                  |                       |                        |                       |                         |                                |                           |                           |                                |                                        |                           |                                  | 0.0                    |                                      |                                      |                                         |                                 | 0                                                     | 0.0                                      | 314                        |                                               | 0                                                | 0.53                      | 0                                             |                     | 0                                            | #DIV/o!                            |                                   |                                          | 0                                              | 0.68                     | 0.00                           |                                | 0.00               |                                     | 0.00                            |                                   | 0.00                          |        |
| 259              | 1970 | Liu Jinlian                       |                 | teacher                  |                       |                        |                       |                         |                                |                           |                           |                                |                                        |                           |                                  | 0.0                    |                                      |                                      |                                         |                                 | 0                                                     | 0.0                                      | 314                        |                                               | 0                                                | 0.53                      | 0                                             |                     | 0                                            | #DIV/o!                            |                                   |                                          | 0                                              | 0.68                     | 0.00                           |                                | 0.00               |                                     | 0.00                            |                                   | 0.00                          |        |
| 260              | 1970 | Liu Xuexu                         |                 | cadre                    |                       |                        |                       |                         |                                |                           |                           |                                |                                        |                           |                                  | 0.0                    |                                      |                                      |                                         |                                 | 0                                                     | 0.0                                      | 314                        |                                               | 0                                                | 0.53                      | 0                                             |                     | 0                                            | #DIV/o!                            |                                   |                                          | 0                                              | 0.68                     | 0.00                           | 200                            | 200.00             | 5.32                                | 194.68                          | -354.18                           | -159.50                       |        |
| 261              | 1970 | Huang Qingxiang                   |                 | teacher                  |                       |                        |                       |                         |                                |                           |                           |                                |                                        |                           |                                  | 0.0                    |                                      |                                      |                                         |                                 | 0                                                     | 0.0                                      | 314                        |                                               | 0                                                | 0.53                      | 0                                             |                     | 0                                            | #DIV/o!                            |                                   |                                          | 0                                              | 0.68                     | 0.00                           |                                | 0.00               |                                     | 0.00                            |                                   | 0.00                          |        |
| 262              | 1970 | Han Junxiu                        |                 | cadre                    |                       |                        |                       |                         |                                |                           |                           |                                |                                        |                           |                                  | 0.0                    |                                      |                                      |                                         |                                 | 0                                                     | 0.0                                      | 314                        |                                               | 0                                                | 0.53                      | 0                                             |                     | 0                                            | #DIV/o!                            |                                   |                                          | 0                                              | 0.68                     | 0.00                           |                                | 0.00               |                                     | 0.00                            |                                   | 0.00                          |        |
| 263              | 1970 | Li Yonggong                       |                 | cadre                    |                       |                        |                       |                         |                                |                           |                           |                                |                                        |                           |                                  | 0.0                    |                                      |                                      |                                         |                                 | 0                                                     | 0.0                                      | 314                        |                                               | 0                                                | 0.53                      | 0                                             |                     | 0                                            | #DIV/o!                            |                                   |                                          | 0                                              | 0.68                     | 0.00                           |                                | 0.00               | 10.94                               | -10.94                          |                                   | -10.94                        |        |
| 264              | 1970 | Ge Changliang                     |                 | teacher                  |                       |                        |                       |                         |                                |                           |                           |                                |                                        |                           |                                  | 0.0                    |                                      |                                      |                                         |                                 | 0                                                     | 0.0                                      | 314                        |                                               | 0                                                | 0.53                      | 0                                             |                     | 0                                            | #DIV/o!                            |                                   |                                          | 0                                              | 0.68                     | 0.00                           |                                | 0.00               |                                     | 0.00                            |                                   | 0.00                          |        |
| 265              | 1970 | Liu Baochang                      | 1               | poor peasant             |                       |                        |                       |                         |                                |                           |                           |                                |                                        |                           |                                  | 0.0                    |                                      |                                      |                                         |                                 | 0                                                     | 0.0                                      | 314                        |                                               | 0                                                | 0.53                      | 0                                             |                     | 0                                            | #DIV/o!                            |                                   |                                          | 0                                              | 0.68                     | 0.00                           |                                | 0.00               |                                     | 0.00                            |                                   | 0.00                          |        |
| 266              | 1970 | Wang Wenkui                       | 1               | cadre                    |                       |                        |                       |                         |                                |                           |                           |                                |                                        |                           |                                  | 0.0                    |                                      |                                      |                                         |                                 | 0                                                     | 0.0                                      | 314                        |                                               | 0                                                | 0.53                      | 0                                             |                     | 0                                            | #DIV/o!                            |                                   |                                          | 0                                              | 0.68                     | 0.00                           |                                | 0.00               |                                     | 0.00                            |                                   | 0.00                          |        |
| 267              | 1970 | Zhao Pingfen                      | 1               | poor peasant             |                       |                        |                       |                         |                                |                           |                           |                                |                                        |                           |                                  | 0.0                    |                                      |                                      |                                         |                                 | 0                                                     | 0.0                                      | 314                        |                                               | 0                                                | 0.53                      | 0                                             |                     | 0                                            | #DIV/o!                            |                                   |                                          | 0                                              | 0.68                     | 0.00                           |                                | 0.00               |                                     | 0.00                            |                                   | 0.00                          |        |
| 268              | 1970 | Gao Peiseng                       | 1               | poor peasant             |                       |                        |                       |                         |                                |                           |                           |                                |                                        |                           |                                  | 0.0                    |                                      |                                      |                                         |                                 | 0                                                     | 0.0                                      | 314                        |                                               | 0                                                | 0.53                      | 0                                             |                     | 0                                            | #DIV/o!                            |                                   |                                          | 0                                              | 0.68                     | 0.00                           |                                | 0.00               |                                     | 0.00                            |                                   | 0.00                          |        |
| 269              | 1970 | Gao Peilin                        | 1               | poor peasant             |                       |                        |                       |                         |                                |                           |                           |                                |                                        |                           |                                  | 0.0                    |                                      |                                      |                                         |                                 | 0                                                     | 0.0                                      | 314                        |                                               | 0                                                | 0.53                      | 0                                             |                     | 0                                            | #DIV/o!                            |                                   |                                          | 0                                              | 0.68                     | 0.00                           |                                | 0.00               |                                     | 0.00                            |                                   | 0.00                          |        |

(cont.)

| Household number | Year | Name of the head of the household | Production team | Class status (1)     | Basic work points (2) | Total labor forces (3) | Male labor forces (4) | Female labor forces (5) | Total household population (6) | Age: 1 to 3 years old (7) | Age: 4 to 7 years old (8) | Age: 8 years old and above (9) | Work points of grain distribution (10) | Laboring work points (11) | Farmyard manure work points (12) | Total work points (13) | Work points of compulsory labor (14) | Work points of help cultivation (15) | Work points of private plots labor (16) | Total deducted work points (17) | Acutal workdays of participation in distribution (18) | Workpoints for rations distribution (19) | Rations per workpoint (20) | Total rations received form distribution (21) | Workdays of participation in distribu-tion (22) | Grains per workpoint (23) | Total grains distributed by work-points (24) | Grains subsidy (25) | Total Grains received from distribution (26) | Distributed grains per person (27) | Distributed grains per adult (28) | Grains received from privated plots (29) | Workdays of participation in distribution (30) | Value per workpoint (31) | Total value of workpoints (32) | Money used for investment (33) | Sum of income (34) | Money distributed in this year (34) | Deposit/ debt of this year (35) | Deposit/ debt over the years (36) | Accumulated deposit/debt (37) |
|------------------|------|-----------------------------------|-----------------|----------------------|-----------------------|------------------------|-----------------------|-------------------------|--------------------------------|---------------------------|---------------------------|--------------------------------|----------------------------------------|---------------------------|----------------------------------|------------------------|--------------------------------------|--------------------------------------|-----------------------------------------|---------------------------------|-------------------------------------------------------|------------------------------------------|----------------------------|-----------------------------------------------|-------------------------------------------------|---------------------------|----------------------------------------------|---------------------|----------------------------------------------|------------------------------------|-----------------------------------|------------------------------------------|------------------------------------------------|--------------------------|--------------------------------|--------------------------------|--------------------|-------------------------------------|---------------------------------|-----------------------------------|-------------------------------|
| 270              | 1970 | Meng Fangli                       | 1               | middle-class peasant |                       |                        |                       |                         |                                |                           |                           |                                |                                        |                           |                                  | 0.0                    |                                      |                                      |                                         |                                 | 0                                                     | 0.0                                      | 314                        |                                               | 0                                               | 0.53                      | 0                                            |                     | 0                                            | #DIV/o!                            |                                   |                                          | 0                                              | 0.68                     | 0.00                           | 0.00                           |                    | 0.00                                |                                 | 0.00                              |                               |
| 271              | 1970 | Lan Weiyong                       | 1               | poor peasant         |                       |                        |                       |                         |                                |                           |                           |                                |                                        |                           |                                  | 0.0                    |                                      |                                      |                                         |                                 | 0                                                     | 0.0                                      | 314                        |                                               | 0                                               | 0.53                      | 0                                            |                     | 0                                            | #DIV/o!                            |                                   |                                          | 0                                              | 0.68                     | 0.00                           | 0.00                           |                    | 0.00                                |                                 | 0.00                              |                               |
| 272              | 1970 | Meng Tianyu                       | 1               | poor peasant         |                       |                        |                       |                         |                                |                           |                           |                                |                                        |                           |                                  | 0.0                    |                                      |                                      |                                         |                                 | 0                                                     | 0.0                                      | 314                        |                                               | 0                                               | 0.53                      | 0                                            |                     | 0                                            | #DIV/o!                            |                                   |                                          | 0                                              | 0.68                     | 0.00                           | 0.00                           |                    | 0.00                                |                                 | 0.00                              |                               |
| 273              | 1970 | Wang Yongmei                      | 1               | teacher              |                       |                        |                       |                         |                                |                           |                           |                                |                                        |                           |                                  | 0.0                    |                                      |                                      |                                         |                                 | 0                                                     | 0.0                                      | 314                        |                                               | 0                                               | 0.53                      | 0                                            |                     | 0                                            | #DIV/o!                            |                                   |                                          | 0                                              | 0.68                     | 0.00                           | 0.00                           |                    | 0.00                                |                                 | 0.00                              |                               |
| 274              | 1970 | Wang Chuanding                    | 2               | teacher              |                       |                        |                       |                         |                                |                           |                           |                                |                                        |                           |                                  | 0.0                    |                                      |                                      |                                         |                                 | 0                                                     | 0.0                                      | 314                        |                                               | 0                                               | 0.53                      | 0                                            |                     | 0                                            | #DIV/o!                            |                                   |                                          | 0                                              | 0.68                     | 0.00                           | 0.00                           |                    | 0.00                                |                                 | 0.00                              |                               |
| 276              | 1970 | Cui Yili                          | 2               | poor peasant         |                       |                        |                       |                         |                                |                           |                           |                                |                                        |                           |                                  | 0.0                    |                                      |                                      |                                         |                                 | 0                                                     | 0.0                                      | 314                        |                                               | 0                                               | 0.53                      | 0                                            |                     | 0                                            | #DIV/o!                            |                                   |                                          | 0                                              | 0.68                     | 0.00                           | 0.00                           |                    | 0.00                                |                                 | 0.00                              |                               |
| 277              | 1970 | Liu Xiangting                     | 2               | poor peasant         |                       |                        |                       |                         |                                |                           |                           |                                |                                        |                           |                                  | 0.0                    |                                      |                                      |                                         |                                 | 0                                                     | 0.0                                      | 314                        |                                               | 0                                               | 0.53                      | 0                                            |                     | 0                                            | #DIV/o!                            |                                   |                                          | 0                                              | 0.68                     | 0.00                           | 0.00                           |                    | 0.00                                |                                 | 0.00                              |                               |
| 278              | 1970 | Meng Hulin                        | 2               | poor peasant         |                       |                        |                       |                         |                                |                           |                           |                                |                                        |                           |                                  | 0.0                    |                                      |                                      |                                         |                                 | 0                                                     | 0.0                                      | 314                        |                                               | 0                                               | 0.53                      | 0                                            |                     | 0                                            | #DIV/o!                            |                                   |                                          | 0                                              | 0.68                     | 0.00                           | 0.00                           |                    | 0.00                                |                                 | 0.00                              |                               |
| 279              | 1970 | Gui Haigeng                       | 1               | poor peasant         |                       |                        |                       |                         |                                |                           |                           |                                |                                        |                           |                                  | 0.0                    |                                      |                                      |                                         |                                 | 0                                                     | 0.0                                      | 314                        |                                               | 0                                               | 0.53                      | 0                                            |                     | 0                                            | #DIV/o!                            |                                   |                                          | 0                                              | 0.68                     | 0.00                           | 0.00                           |                    | 0.00                                |                                 | 0.00                              |                               |
| 280              | 1970 | Meng Tianfu                       | 2               | poor peasant         |                       |                        |                       |                         |                                |                           |                           |                                |                                        |                           |                                  | 0.0                    |                                      |                                      |                                         |                                 | 0                                                     | 0.0                                      | 314                        |                                               | 0                                               | 0.53                      | 0                                            |                     | 0                                            | #DIV/o!                            |                                   |                                          | 0                                              | 0.68                     | 0.00                           | 0.00                           |                    | 0.00                                |                                 | 0.00                              |                               |
| 282              | 1970 | Liu Peiyi                         | 1               | poor peasant         |                       |                        |                       |                         |                                |                           |                           |                                |                                        |                           |                                  | 0.0                    |                                      |                                      |                                         |                                 | 0                                                     | 0.0                                      | 314                        |                                               | 0                                               | 0.53                      | 0                                            |                     | 0                                            | #DIV/o!                            |                                   |                                          | 0                                              | 0.68                     | 0.00                           | 0.00                           |                    | 0.00                                |                                 | 0.00                              |                               |
| 283              | 1970 | Wang Jie                          | 1               | poor peasant         |                       |                        |                       |                         |                                |                           |                           |                                |                                        |                           |                                  | 0.0                    |                                      |                                      |                                         |                                 | 0                                                     | 0.0                                      | 314                        |                                               | 0                                               | 0.53                      | 0                                            |                     | 0                                            | #DIV/o!                            |                                   |                                          | 0                                              | 0.68                     | 0.00                           | 0.00                           |                    | 0.00                                |                                 | 0.00                              |                               |
| 284              | 1970 | Zhang Guangxue                    | 1               |                      |                       |                        |                       |                         |                                |                           |                           |                                |                                        |                           |                                  | 0.0                    |                                      |                                      |                                         |                                 | 0                                                     | 0.0                                      | 314                        |                                               | 0                                               | 0.53                      | 0                                            |                     | 0                                            | #DIV/o!                            |                                   |                                          | 0                                              | 0.68                     | 0.00                           | 0.00                           |                    | 0.00                                |                                 | 0.00                              |                               |
| 285              | 1970 | Wu Weiyi                          | 2               |                      |                       |                        |                       |                         |                                |                           |                           |                                |                                        |                           |                                  | 0.0                    |                                      |                                      |                                         |                                 | 0                                                     | 0.0                                      | 314                        |                                               | 0                                               | 0.53                      | 0                                            |                     | 0                                            | #DIV/o!                            |                                   |                                          | 0                                              | 0.68                     | 0.00                           | 0.00                           |                    | 0.00                                |                                 | 0.00                              |                               |
| 286              | 1970 | Wang Shusheng                     | 2               | poor peasant         |                       |                        |                       |                         |                                |                           |                           |                                |                                        |                           |                                  | 0.0                    |                                      |                                      |                                         |                                 | 0                                                     | 0.0                                      | 314                        |                                               | 0                                               | 0.53                      | 0                                            |                     | 0                                            | #DIV/o!                            |                                   |                                          | 0                                              | 0.68                     | 0.00                           | 0.00                           |                    | 0.00                                |                                 | 0.00                              |                               |
| 287              | 1970 | Niu Rusheng                       | 1               | educated youth       |                       |                        |                       |                         |                                |                           |                           |                                |                                        |                           |                                  | 0.0                    |                                      |                                      |                                         |                                 | 0                                                     | 0.0                                      | 314                        |                                               | 0                                               | 0.53                      | 0                                            |                     | 0                                            | #DIV/o!                            |                                   |                                          | 0                                              | 0.68                     | 0.00                           | 0.00                           |                    | 0.00                                |                                 | 0.00                              |                               |
| 288              | 1970 | Yan Lianglian                     |                 | educated youth       |                       |                        |                       |                         |                                |                           |                           |                                |                                        |                           |                                  | 0.0                    |                                      |                                      |                                         |                                 | 0                                                     | 0.0                                      | 314                        |                                               | 0                                               | 0.53                      | 0                                            |                     | 0                                            | #DIV/o!                            |                                   |                                          | 0                                              | 0.68                     | 0.00                           | 0.00                           |                    | 0.00                                |                                 | 0.00                              |                               |
| 289              | 1970 | Huang Hailian                     |                 | educated youth       |                       |                        |                       |                         |                                |                           |                           |                                |                                        |                           |                                  | 0.0                    |                                      |                                      |                                         |                                 | 0                                                     | 0.0                                      | 314                        |                                               | 0                                               | 0.53                      | 0                                            |                     | 0                                            | #DIV/o!                            |                                   |                                          | 0                                              | 0.68                     | 0.00                           | 0.00                           |                    | 0.00                                |                                 | 0.00                              |                               |
| 290              | 1970 | Zhou Xiuhua                       |                 | educated youth       |                       |                        |                       |                         |                                |                           |                           |                                |                                        |                           |                                  | 0.0                    |                                      |                                      |                                         |                                 | 0                                                     | 0.0                                      | 314                        |                                               | 0                                               | 0.53                      | 0                                            |                     | 0                                            | #DIV/o!                            |                                   |                                          | 0                                              | 0.68                     | 0.00                           | 0.00                           |                    | 0.00                                |                                 | 0.00                              |                               |
| 291              | 1970 | Lan Aiyiing                       | 2               | educated youth       |                       |                        |                       |                         |                                |                           |                           |                                |                                        |                           |                                  | 0.0                    |                                      |                                      |                                         |                                 | 0                                                     | 0.0                                      | 314                        |                                               | 0                                               | 0.53                      | 0                                            |                     | 0                                            | #DIV/o!                            |                                   |                                          | 0                                              | 0.68                     | 0.00                           | 0.00                           |                    | 0.00                                |                                 | 0.00                              |                               |
| 292              | 1970 | Meng Erlin                        | 2               |                      |                       |                        |                       |                         |                                |                           |                           |                                |                                        |                           |                                  | 0.0                    |                                      |                                      |                                         |                                 | 0                                                     | 0.0                                      | 314                        |                                               | 0                                               | 0.53                      | 0                                            |                     | 0                                            | #DIV/o!                            |                                   |                                          | 0                                              | 0.68                     | 0.00                           | 0.00                           |                    | 0.00                                |                                 | 0.00                              |                               |
| 293              | 1970 | Liu Jinting                       | 2               |                      |                       |                        |                       |                         |                                |                           |                           |                                |                                        |                           |                                  | 0.0                    |                                      |                                      |                                         |                                 | 0                                                     | 0.0                                      | 314                        |                                               | 0                                               | 0.53                      | 0                                            |                     | 0                                            | #DIV/o!                            |                                   |                                          | 0                                              | 0.68                     | 0.00                           | 0.00                           |                    | 0.00                                |                                 | 0.00                              |                               |
| 294              | 1970 | Meng Peilin2                      | 2               |                      |                       |                        |                       |                         |                                |                           |                           |                                |                                        |                           |                                  | 0.0                    |                                      |                                      |                                         |                                 | 0                                                     | 0.0                                      | 314                        |                                               | 0                                               | 0.53                      | 0                                            |                     | 0                                            | #DIV/o!                            |                                   |                                          | 0                                              | 0.68                     | 0.00                           | 0.00                           |                    | 0.00                                |                                 | 0.00                              |                               |
| 296              | 1970 | Wang Jiantang                     | 2               |                      |                       |                        |                       |                         |                                |                           |                           |                                |                                        |                           |                                  | 0.0                    |                                      |                                      |                                         |                                 | 0                                                     | 0.0                                      | 314                        |                                               | 0                                               | 0.53                      | 0                                            |                     | 0                                            | #DIV/o!                            |                                   |                                          | 0                                              | 0.68                     | 0.00                           | 0.00                           |                    | 0.00                                |                                 | 0.00                              |                               |
| 297              | 1970 | Wu Jinxing                        | 2               |                      |                       |                        |                       |                         |                                |                           |                           |                                |                                        |                           |                                  | 0.0                    |                                      |                                      |                                         |                                 | 0                                                     | 0.0                                      | 314                        |                                               | 0                                               | 0.53                      | 0                                            |                     | 0                                            | #DIV/o!                            |                                   |                                          | 0                                              | 0.68                     | 0.00                           | 0.00                           |                    | 0.00                                |                                 | 0.00                              |                               |
| 298              | 1970 | Li Jiaji                          | 1               | poor peasant         |                       |                        |                       |                         |                                |                           |                           |                                |                                        |                           |                                  | 0.0                    |                                      |                                      |                                         |                                 | 0                                                     | 0.0                                      | 314                        |                                               | 0                                               | 0.53                      | 0                                            |                     | 0                                            | #DIV/o!                            |                                   |                                          | 0                                              | 0.68                     | 0.00                           | 0.00                           |                    | 0.00                                |                                 | 0.00                              |                               |
| 299              | 1970 | Liu Wuyi                          | 1               | poor peasant         |                       |                        |                       |                         |                                |                           |                           |                                |                                        |                           |                                  | 0.0                    |                                      |                                      |                                         |                                 | 0                                                     | 0.0                                      | 314                        |                                               | 0                                               | 0.53                      | 0                                            |                     | 0                                            | #DIV/o!                            |                                   |                                          | 0                                              | 0.68                     | 0.00                           | 0.00                           |                    | 0.00                                |                                 | 0.00                              |                               |
| 300              | 1970 | Hou Donglai                       | 1               | poor peasant         |                       |                        |                       |                         | 1                              |                           |                           |                                |                                        | 23.9                      | 8.5                              | 32.4                   |                                      |                                      |                                         |                                 | 32                                                    | 1.0                                      | 314                        | 314                                           | 32                                              | 0.53                      | 17                                           | 331                 | 331                                          |                                    |                                   | 32.4                                     | 0.68                                           | 22.03                    | 22.03                          |                                | 22.03              |                                     | 22.03                           |                                   |                               |
| 1                | 1971 | Meng Tianyun                      | 2               | poor peasant         | 18                    | 3                      | 1                     | 2                       | 7                              | 1                         |                           | 6                              | 66                                     | 496                       | 135                              | 631                    | 23                                   | 5                                    | 28                                      | 56                              |                                                       | 66                                       | 34                         | 2244                                          | 575                                             | 0.7                       | 402.5                                        |                     | 2646.5                                       | 378                                |                                   | 350                                      | 575                                            | 0.75                     | 431.25                         | 30.00                          |                    | 445.46                              | 15.79                           | 58.42                             | 74.21                         |
| 2                | 1971 | Yang Fengming                     | 1               | middle-class peasant | 11                    | 2                      | 1                     | 1                       | 2                              |                           |                           | 2                              | 20                                     | 280                       | 28                               | 308                    | 14                                   | 3                                    | 8                                       | 25                              |                                                       | 20                                       | 34                         | 680                                           | 283                                             | 0.7                       | 198.1                                        |                     | 878.1                                        | 439                                |                                   | 100                                      | 283                                            | 0.75                     | 212.25                         |                                | 137.92             | 74.33                               | -27.82                          | 46.51                             |                               |

(cont.)

| Household number | Year | Name of the head of the household | Production team | Class status (1)         | Basic work points (2) | Total labor forces (3) | Male labor forces (4) | Female labor forces (5) | Total household population (6) | Age: 1 to 3 years old (7) | Age: 4 to 7 years old (8) | Age: 8 years old and above (9) | Work points of grain distribution (10) | Laboring work points (11) | Farmyard manure work points (12) | Total work points (13) | Work points of compulsory labor (14) | Work points of help cultivation (15) | Work points of private plots labor (16) | Total deducted work points (17) | Actual workdays of participation in distribution (18) | Workpoints for rations distribution (19) | Rations per workpoint (20) | Total rations received from distribution (21) | Workdays of participation in distribution (22) | Grains per workpoint (23) | Total grains distributed by work-points (24) | Grains subsidy (25) | Total Grains received from distribution (26) | Distributed grains per person (27) | Distributed grains per adult (28) | Grains received from private plots (29) | Workdays of participation in distribution (30) | Value per workpoint (31) | Total value of workpoints (32) | Money used for investment (33) | Sum of income (34) | Money distributed in this year (34) | Deposit/debt of this year (35) | Deposit/debt over the years (36) | Accumulated deposit/debt (37) |
|------------------|------|-----------------------------------|-----------------|--------------------------|-----------------------|------------------------|-----------------------|-------------------------|--------------------------------|---------------------------|---------------------------|--------------------------------|----------------------------------------|---------------------------|----------------------------------|------------------------|--------------------------------------|--------------------------------------|-----------------------------------------|---------------------------------|-------------------------------------------------------|------------------------------------------|----------------------------|-----------------------------------------------|------------------------------------------------|---------------------------|----------------------------------------------|---------------------|----------------------------------------------|------------------------------------|-----------------------------------|-----------------------------------------|------------------------------------------------|--------------------------|--------------------------------|--------------------------------|--------------------|-------------------------------------|--------------------------------|----------------------------------|-------------------------------|
| 3                | 1971 | Li Chengxin                       | 1               | poor peasant             | 33                    | 4                      | 3                     | 1                       | 8                              |                           |                           | 8                              | 80                                     | 966                       | 66                               | 1032                   | 43                                   | 10                                   | 32                                      | 85                              |                                                       | 80                                       | 34                         | 2720                                          | 947                                            | 0.7                       | 662.9                                        | 100                 | 3482.9                                       | 435                                |                                   | 400                                     | 947                                            | 0.75                     | 710.25                         | 1.78                           | 716.20             | -4.17                               | -426.62                        | -430.79                          |                               |
| 4                | 1971 | Li Zeying                         | 1               | poor peasant             | 10                    | 2                      | 0                     | 2                       | 2                              |                           |                           | 2                              | 20                                     | 196                       | 10                               | 206                    | 13                                   | 3                                    | 8                                       | 24                              |                                                       | 20                                       | 34                         | 680                                           | 182                                            | 0.7                       | 127.4                                        |                     | 807.4                                        | 404                                |                                   | 100                                     | 182                                            | 0.75                     | 136.50                         |                                | 189.42             | -52.92                              | 83.92                          | 31.00                            |                               |
| 5                | 1971 | Gao Peizhong                      | 1               | poor peasant             | 24                    | 3                      | 1                     | 2                       | 8                              | 1                         |                           | 7                              | 76                                     | 681                       | 66                               | 747                    | 31                                   | 7                                    | 32                                      | 70                              |                                                       | 76                                       | 34                         | 2584                                          | 677                                            | 0.7                       | 473.9                                        |                     | 3057.9                                       | 382                                |                                   | 400                                     | 677                                            | 0.75                     | 507.75                         |                                | 591.52             | -83.77                              | -303.05                        | -386.82                          |                               |
| 6                | 1971 | Kong Qingquan                     | 1               | poor peasant             | 10                    | 2                      | 0                     | 2                       | 6                              |                           |                           | 6                              | 60                                     | 562                       | 91                               | 653                    | 13                                   | 3                                    | 24                                      | 40                              |                                                       | 60                                       | 34                         | 2040                                          | 613                                            | 0.7                       | 429.1                                        |                     | 2469.1                                       | 412                                |                                   | 300                                     | 613                                            | 0.75                     | 459.75                         |                                | 538.42             | -78.67                              | 241.15                         | 162.48                           |                               |
| 7                | 1971 | Li Chengren                       | 1               | middle-class peasant     |                       |                        |                       |                         | 2                              |                           |                           | 2                              | 20                                     | 20                        | 18                               | 38                     |                                      |                                      | 8                                       | 8                               |                                                       | 20                                       | 34                         | 680                                           | 30                                             | 0.7                       | 21                                           |                     | 701                                          | 351                                |                                   | 100                                     | 30                                             | 0.75                     | 22.50                          |                                | 132.98             | -110.48                             | -75.19                         | -185.67                          |                               |
| 8                | 1971 | Wu Jixiang                        | 1               | middle-class peasant     | 7                     | 1                      | 0                     | 1                       | 5                              | 1                         | 1                         | 3                              | 44                                     | 49                        | 7                                | 56                     | 10                                   | 2                                    | 20                                      | 32                              |                                                       | 44                                       | 34                         | 1496                                          | 24                                             | 0.7                       | 16.8                                         | 100                 | 1612.8                                       | 323                                |                                   | 250                                     | 24                                             | 0.75                     | 18.00                          | 215.00                         | 273.29             | -40.29                              | 25.11                          | -15.18                           |                               |
| 9                | 1971 | Kong Fangyu                       | 1               | poor peasant             | 7                     | 1                      | 0                     | 1                       | 2                              | 1                         |                           | 1                              | 16                                     | 3                         | 10                               | 13                     | 10                                   | 2                                    | 8                                       | 20                              |                                                       | 16                                       | 34                         | 544                                           | 0                                              | 0.7                       | 0                                            | 80                  | 624                                          | 312                                |                                   | 100                                     | 0                                              | 0.75                     | 0.00                           | 95.00                          | 99.99              | -4.99                               | -69.70                         | -74.69                           |                               |
| 10               | 1971 | Gao Wei                           | 1               | poor peasant             | 20                    | 3                      | 1                     | 2                       | 4                              |                           |                           | 4                              | 40                                     | 738                       | 39                               | 777                    | 26                                   | 6                                    | 16                                      | 48                              |                                                       | 40                                       | 34                         | 1360                                          | 729                                            | 0.7                       | 510.3                                        |                     | 1870.3                                       | 468                                |                                   | 200                                     | 729                                            | 0.75                     | 546.75                         |                                | 511.47             | 35.28                               | 267.52                         | 302.80                           |                               |
| 11               | 1971 | Gao Jun                           | 1               | poor peasant             |                       |                        |                       |                         | 1                              |                           |                           | 1                              | 10                                     | 180                       | 5                                | 185                    |                                      |                                      | 4                                       | 4                               |                                                       | 10                                       | 34                         | 340                                           | 181                                            | 0.7                       | 126.7                                        |                     | 466.7                                        | 467                                |                                   | 50                                      | 181                                            | 0.75                     | 135.75                         |                                | 118.90             | 16.85                               | 21.90                          | 38.75                            |                               |
| 12               | 1971 | Gao Peixiao                       | 1               | poor peasant             | 17                    | 2                      | 1                     | 1                       | 5                              | 2                         | 1                         | 2                              | 40                                     | 529                       | 86                               | 615                    | 20                                   | 5                                    | 20                                      | 45                              |                                                       | 40                                       | 34                         | 1360                                          | 570                                            | 0.7                       | 399                                          |                     | 1759                                         | 352                                |                                   | 250                                     | 570                                            | 0.75                     | 427.50                         |                                | 391.55             | 35.95                               | 11.60                          | 47.55                            |                               |
| 13               | 1971 | Gao Shang                         | 1               | poor peasant             |                       |                        |                       |                         | 2                              |                           |                           | 2                              | 20                                     | 292                       | 49                               | 341                    |                                      |                                      | 8                                       | 8                               |                                                       | 20                                       | 34                         | 680                                           | 333                                            | 0.7                       | 233.1                                        |                     | 913.1                                        | 457                                |                                   | 100                                     | 333                                            | 0.75                     | 249.75                         |                                | 200.04             | 49.71                               | -146.51                        | -96.80                           |                               |
| 14               | 1971 | Mu Zhaolin                        | 1               | poor peasant             | 17                    | 2                      | 1                     | 1                       | 4                              | 1                         |                           | 3                              | 36                                     | 512                       | 43                               | 555                    | 22                                   | 5                                    | 16                                      | 43                              |                                                       | 36                                       | 34                         | 1224                                          | 512                                            | 0.7                       | 358.4                                        |                     | 1582.4                                       | 396                                |                                   | 200                                     | 512                                            | 0.75                     | 384.00                         |                                | 353.46             | 30.54                               | 13.90                          | 44.44                            |                               |
| 15               | 1971 | Cao Cuizhen                       | 2               | poor peasant             | 26                    | 4                      | 2                     | 2                       | 7                              |                           |                           | 7                              | 70                                     | 839                       | 76                               | 915                    | 34                                   | 8                                    | 28                                      | 70                              |                                                       | 70                                       | 34                         | 2380                                          | 845                                            | 0.7                       | 591.5                                        |                     | 2971.5                                       | 425                                |                                   | 350                                     | 845                                            | 0.75                     | 633.75                         |                                | 671.87             | -38.12                              | 426.38                         | 388.26                           |                               |
| 16               | 1971 | Cao Jianren                       | 2               | poor peasant             | 17                    | 2                      | 1                     | 1                       | 6                              | 2                         | 2                         | 2                              | 48                                     | 615                       | 87                               | 702                    | 20                                   | 5                                    | 24                                      | 49                              |                                                       | 48                                       | 34                         | 1632                                          | 653                                            | 0.7                       | 457.1                                        |                     | 2089.1                                       | 348                                |                                   | 300                                     | 653                                            | 0.75                     | 489.75                         |                                | 437.43             | 52.32                               | -71.42                         | -19.10                           |                               |
| 17               | 1971 | Liu Guiwu                         | 1               | poor peasant             |                       |                        |                       |                         | 1                              |                           |                           | 1                              | 10                                     |                           |                                  | 0                      |                                      |                                      | 0                                       |                                 |                                                       | 10                                       | 34                         | 340                                           | 0                                              | 0.7                       | 0                                            | 10                  | 350                                          | 350                                |                                   | 50                                      | 0                                              | 0.75                     | 0.00                           |                                | 106.92             | -106.92                             | -790.36                        | -897.28                          |                               |
| 18               | 1971 | Meng Mingde                       | 1               | poor peasant             | 32                    | 4                      | 2                     | 2                       | 8                              | 1                         |                           | 7                              | 76                                     | 949                       | 88                               | 1037                   | 42                                   | 10                                   | 32                                      | 84                              |                                                       | 76                                       | 34                         | 2584                                          | 953                                            | 0.7                       | 667.1                                        | 30                  | 3281.1                                       | 410                                |                                   | 400                                     | 953                                            | 0.75                     | 714.75                         |                                | 784.57             | -69.82                              | 429.96                         | 360.14                           |                               |
| 19               | 1971 | Mu Shouliang                      | 1               | poor peasant             |                       |                        |                       |                         | 2                              |                           |                           | 2                              | 20                                     | 93                        | 66                               | 159                    |                                      |                                      | 8                                       | 8                               |                                                       | 20                                       | 34                         | 680                                           | 151                                            | 0.7                       | 105.7                                        |                     | 785.7                                        | 393                                |                                   | 100                                     | 151                                            | 0.75                     | 113.25                         |                                | 144.16             | -30.91                              | -75.16                         | -106.07                          |                               |
| 20               | 1971 | Meng Mingbao                      | 1               | poor peasant             | 29                    | 4                      | 3                     | 1                       | 4                              |                           |                           | 4                              | 40                                     | 1049                      | 6                                | 1055                   | 38                                   | 9                                    | 16                                      | 63                              |                                                       | 40                                       | 34                         | 1360                                          | 992                                            | 0.7                       | 694.4                                        |                     | 2054.4                                       | 514                                |                                   | 200                                     | 992                                            | 0.75                     | 744.00                         | 1.78                           | 554.54             | 191.24                              | 238.98                         | 430.22                           |                               |
| 21               | 1971 | Meng Mingjin                      | 1               | poor peasant             | 3                     | 1                      | 0                     | 1                       | 2                              |                           |                           | 2                              | 20                                     | 246                       | 30                               | 276                    | 4                                    | 1                                    | 8                                       | 13                              |                                                       | 20                                       | 34                         | 680                                           | 263                                            | 0.7                       | 184.1                                        |                     | 864.1                                        | 432                                |                                   | 100                                     | 263                                            | 0.75                     | 197.25                         |                                | 201.35             | -4.10                               | 33.31                          | 29.21                            |                               |
| 22               | 1971 | Liang Shiren                      | 1               | low-middle-class peasant |                       |                        |                       |                         | 2                              |                           |                           | 2                              | 20                                     | 17                        | 10                               | 27                     |                                      |                                      | 8                                       | 8                               |                                                       | 20                                       | 34                         | 680                                           | 19                                             | 0.7                       | 13.3                                         |                     | 693.3                                        | 347                                |                                   | 100                                     | 19                                             | 0.75                     | 14.25                          |                                | 135.42             | -121.17                             | -79.01                         | -200.18                          |                               |
| 23               | 1971 | Liang Yingfu                      | 1               | low-middle-class peasant | 10                    | 1                      | 1                     | 0                       | 4                              |                           |                           | 4                              | 40                                     | 400                       | 79                               | 479                    | 13                                   | 3                                    | 16                                      | 32                              |                                                       | 40                                       | 34                         | 1360                                          | 447                                            | 0.7                       | 312.9                                        |                     | 1672.9                                       | 418                                |                                   | 200                                     | 447                                            | 0.75                     | 335.25                         |                                | 333.23             | 2.02                                | -269.44                        | -267.42                          |                               |
| 24               | 1971 | Lei Guangzhi                      | 1               | low-middle-class peasant | 17                    | 2                      | 1                     | 1                       | 3                              |                           |                           | 3                              | 30                                     | 375                       | 15                               | 390                    | 22                                   | 5                                    | 12                                      | 39                              |                                                       | 30                                       | 34                         | 1020                                          | 351                                            | 0.7                       | 245.7                                        |                     | 1265.7                                       | 422                                |                                   | 150                                     | 351                                            | 0.75                     | 263.25                         |                                | 361.36             | -98.11                              | -533.94                        | -632.05                          |                               |
| 25               | 1971 | Fan Lishi                         | 1               | middle-class peasant     | 27                    | 3                      | 2                     | 1                       | 7                              |                           |                           | 7                              | 70                                     | 817                       | 153                              | 970                    | 35                                   | 8                                    | 28                                      | 71                              |                                                       | 70                                       | 34                         | 2380                                          | 899                                            | 0.7                       | 629.3                                        | 100                 | 3109.3                                       | 444                                |                                   | 350                                     | 899                                            | 0.75                     | 674.25                         | 27.44                          | 622.05             | 79.64                               | 194.10                         | 273.74                           |                               |
| 26               | 1971 | Zhang Quangui                     | 1               | middle-class peasant     |                       |                        |                       |                         | 1                              |                           |                           | 1                              | 10                                     | 51                        | 5                                | 56                     |                                      |                                      | 4                                       | 4                               |                                                       | 10                                       | 34                         | 340                                           | 52                                             | 0.7                       | 36.4                                         |                     | 376.4                                        | 376                                |                                   | 50                                      | 52                                             | 0.75                     | 39.00                          |                                | 78.72              | -39.72                              | -238.46                        | -278.18                          |                               |

(cont.)

| Household number | Year | Name of the head of the household | Production team | Class status (1)         | Basic work points (2) | Total labor forces (3) | Male labor forces (4) | Female labor forces (5) | Total household population (6) | Age: 1 to 3 years old (7) | Age: 4 to 7 years old (8) | Age: 8 years old and above (9) | Work points of grain distribution (10) | Laboring work points (11) | Farmyard manure work points (12) | Total work points (13) | Work points of compulsory labor (14) | Work points of help cultivation (15) | Work points of private plots labor (16) | Total deducted work points (17) | Actual workdays of participation in distribution (18) | Workpoints for rations distribution (19) | Rations per workpoint (20) | Total rations received from distribution (21) | Workdays of participation in distribution (22) | Grains per workpoint (23) | Total grains distributed by work-points (24) | Grains subsidy (25) | Total Grains received from distribution (26) | Distributed grains per person (27) | Distributed grains per adult (28) | Grains received from private plots (29) | Workdays of participation in distribution (30) | Value per workpoint (31) | Total value of workpoints (32) | Money used for investment (33) | Sum of income (34) | Money distributed in this year (34) | Deposit/debt of this year (35) | Deposit/debt over the years (36) | Accumulated deposit/debt (37) |         |
|------------------|------|-----------------------------------|-----------------|--------------------------|-----------------------|------------------------|-----------------------|-------------------------|--------------------------------|---------------------------|---------------------------|--------------------------------|----------------------------------------|---------------------------|----------------------------------|------------------------|--------------------------------------|--------------------------------------|-----------------------------------------|---------------------------------|-------------------------------------------------------|------------------------------------------|----------------------------|-----------------------------------------------|------------------------------------------------|---------------------------|----------------------------------------------|---------------------|----------------------------------------------|------------------------------------|-----------------------------------|-----------------------------------------|------------------------------------------------|--------------------------|--------------------------------|--------------------------------|--------------------|-------------------------------------|--------------------------------|----------------------------------|-------------------------------|---------|
| 27               | 1971 | Wang Bangjie                      | 1               | low-middle-class peasant | 17                    | 2                      | 1                     | 1                       | 3                              |                           |                           | 3                              | 30                                     | 365                       | 37                               | 402                    | 22                                   | 5                                    | 12                                      | 39                              |                                                       | 30                                       | 34                         | 1020                                          | 363                                            | 0.7                       | 254.1                                        |                     | 1274.1                                       | 425                                |                                   | 150                                     | 363                                            | 0.75                     | 272.25                         |                                |                    | 301.42                              | -29.17                         | -74.31                           | -103.48                       |         |
| 28               | 1971 | Meng Tianxing                     | 1               | low-middle-class peasant | 17                    | 2                      | 1                     | 1                       | 6                              | 2                         |                           | 4                              | 52                                     | 430                       | 65                               | 495                    | 20                                   | 5                                    | 24                                      | 49                              |                                                       | 52                                       | 34                         | 1768                                          | 446                                            | 0.7                       | 312.2                                        |                     | 2080.2                                       | 347                                |                                   | 300                                     | 446                                            | 0.75                     | 334.50                         |                                |                    | 365.15                              | -30.65                         | -98.70                           | -129.35                       |         |
| 29               | 1971 | Xue Baolin                        | 1               | low-middle-class peasant | 7                     | 1                      | 0                     | 1                       | 5                              | 1                         | 1                         | 3                              | 44                                     |                           | 25                               | 25                     | 9                                    | 2                                    | 20                                      | 31                              |                                                       | 44                                       | 34                         | 1496                                          | 0                                              | 0.7                       | 0                                            | 100                 | 1596                                         | 319                                |                                   | 250                                     |                                                | 0.75                     | 0.00                           | 230.00                         |                    |                                     | 258.84                         | -28.84                           | 22.15                         | -6.69   |
| 30               | 1971 | Cao Cuiheng                       | 1               | low-middle-class peasant | 3                     | 1                      | 0                     | 1                       | 2                              |                           |                           | 2                              | 20                                     | 336                       | 67                               | 403                    | 4                                    | 1                                    | 8                                       | 13                              |                                                       | 20                                       | 34                         | 680                                           | 390                                            | 0.7                       | 273                                          |                     | 953                                          | 477                                |                                   | 100                                     | 390                                            | 0.75                     | 292.50                         |                                |                    | 242.19                              | 50.31                          | 95.64                            | 145.95                        |         |
| 31               | 1971 | Ma Hongxiang                      | 1               | low-middle-class peasant | 7                     | 1                      | 0                     | 1                       | 2                              | 1                         |                           | 1                              | 16                                     | 132                       | 3                                | 135                    | 9                                    | 2                                    | 8                                       | 19                              |                                                       | 16                                       | 34                         | 544                                           | 116                                            | 0.7                       | 81.2                                         |                     | 625.2                                        | 313                                |                                   | 100                                     | 116                                            | 0.75                     | 87.00                          | 20.00                          |                    | 103.10                              | 3.90                           | -85.13                           | -81.23                        |         |
| 32               | 1971 | Ruan Baorong                      | 0               | low-middle-class peasant | 32                    | 4                      | 2                     | 2                       | 6                              |                           |                           | 6                              | 60                                     | 1272                      | 104                              | 1376                   | 42                                   | 10                                   | 24                                      | 76                              |                                                       | 60                                       | 34                         | 2040                                          | 1300                                           | 0.7                       | 910                                          |                     | 2950                                         | 492                                |                                   | 300                                     | 1300                                           | 0.75                     | 975.00                         |                                |                    | 759.19                              | 215.81                         | 327.99                           | 543.80                        |         |
| 33               | 1971 | Cao Qiguo                         | 1               | low-middle-class peasant | 17                    | 2                      | 1                     | 1                       | 7                              | 2                         | 1                         | 4                              | 60                                     | 433                       | 103                              | 536                    | 20                                   | 5                                    | 28                                      | 53                              |                                                       | 60                                       | 34                         | 2040                                          | 483                                            | 0.7                       | 338.1                                        | 100                 | 2478.1                                       | 354                                |                                   | 350                                     | 483                                            | 0.75                     | 362.25                         |                                |                    | 429.27                              | -67.02                         | -45.76                           | -112.78                       |         |
| 34               | 1971 | Liu Jinliang                      | 1               | poor peasant             | 13                    | 2                      | 1                     | 1                       | 6                              |                           |                           | 6                              | 60                                     | 815                       | 63                               | 878                    | 17                                   | 4                                    | 24                                      | 45                              |                                                       | 60                                       | 34                         | 2040                                          | 833                                            | 0.7                       | 583.1                                        |                     | 2623.1                                       | 437                                |                                   | 300                                     | 833                                            | 0.75                     | 624.75                         |                                |                    | 590.90                              | 33.85                          | 268.76                           | 302.61                        |         |
| 35               | 1971 | Shi Baoshou                       | 1               | low-middle-class peasant | 20                    | 3                      | 1                     | 2                       | 7                              | 1                         | 1                         | 5                              | 64                                     | 762                       | 72                               | 834                    | 26                                   | 6                                    | 28                                      | 60                              |                                                       | 64                                       | 34                         | 2176                                          | 774                                            | 0.7                       | 541.8                                        |                     | 2717.8                                       | 388                                |                                   | 350                                     | 774                                            | 0.75                     | 580.50                         |                                |                    | 571.65                              | 8.85                           | -1045.96                         | -1037.11                      |         |
| 36               | 1971 | Wang Qiding                       | 0               | low-middle-class peasant | 10                    | 1                      | 1                     | 0                       | 2                              |                           |                           | 2                              | 20                                     | 244                       | 10                               | 254                    | 13                                   | 3                                    | 8                                       | 24                              |                                                       | 20                                       | 34                         | 680                                           | 230                                            | 0.7                       | 161                                          |                     | 841                                          | 421                                |                                   | 100                                     | 230                                            | 0.75                     | 172.50                         | 8.00                           |                    | 169.15                              | 11.35                          | 96.11                            | 107.46                        |         |
| 37               | 1971 | Yu Zhankui                        | 1               | poor peasant             | 17                    | 2                      | 1                     | 1                       | 5                              | 1                         | 1                         | 3                              | 44                                     | 1                         | 40                               | 41                     | 22                                   | 5                                    | 20                                      | 47                              |                                                       | 44                                       | 34                         | 1496                                          | 0                                              | 0.7                       | 0                                            | 100                 | 1596                                         | 319                                |                                   | 250                                     |                                                | 0.75                     | 0.00                           | 190.00                         |                    |                                     | 264.64                         | -74.64                           | -189.45                       | -264.09 |
| 38               | 1971 | Liu Yucan                         | 1               | poor peasant             | 17                    | 2                      | 1                     | 1                       | 5                              | 1                         | 2                         | 2                              | 42                                     | 378                       | 56                               | 434                    | 9                                    | 2                                    | 20                                      | 31                              |                                                       | 42                                       | 34                         | 1428                                          | 403                                            | 0.7                       | 282.1                                        |                     | 1710.1                                       | 342                                |                                   | 250                                     | 403                                            | 0.75                     | 302.25                         |                                |                    | 390.42                              | -88.17                         | -155.11                          | -243.28                       |         |
| 39               | 1971 | Liu Guiting                       | 1               | middle-class peasant     |                       |                        |                       |                         | 3                              |                           |                           | 3                              | 30                                     | 498                       | 66                               | 564                    |                                      |                                      | 12                                      | 12                              |                                                       | 30                                       | 34                         | 1020                                          | 552                                            | 0.7                       | 386.4                                        |                     | 1406.4                                       | 469                                |                                   | 150                                     | 552                                            | 0.75                     | 414.00                         |                                |                    | 382.57                              | 31.43                          | 104.61                           | 136.04                        |         |
| 40               | 1971 | Liu Chengze                       | 1               | middle-class peasant     |                       |                        |                       |                         | 1                              |                           |                           | 1                              | 10                                     | 253                       | 5                                | 258                    |                                      |                                      | 4                                       | 4                               |                                                       | 10                                       | 34                         | 340                                           | 254                                            | 0.7                       | 177.8                                        |                     | 517.8                                        | 518                                |                                   | 50                                      | 254                                            | 0.75                     | 190.50                         |                                |                    | 121.88                              | 68.62                          | 0.53                             | 69.15                         |         |
| 41               | 1971 | Li Jinhu                          | 1               | middle-class peasant     | 10                    | 1                      | 1                     | 0                       | 3                              |                           |                           | 3                              | 30                                     | 465                       | 52                               | 517                    | 13                                   | 3                                    | 12                                      | 28                              |                                                       | 30                                       | 34                         | 1020                                          | 489                                            | 0.7                       | 342.3                                        |                     | 1362.3                                       | 454                                |                                   | 150                                     | 489                                            | 0.75                     | 366.75                         |                                |                    | 337.56                              | 29.19                          | 172.23                           | 201.42                        |         |
| 42               | 1971 | Meng Xiqing                       | 0               | poor peasant             | 17                    | 2                      | 1                     | 1                       | 7                              | 1                         | 1                         | 5                              | 64                                     | 519                       | 95                               | 614                    | 22                                   | 5                                    | 28                                      | 55                              |                                                       | 64                                       | 34                         | 2176                                          | 559                                            | 0.7                       | 391.3                                        |                     | 2567.3                                       | 367                                |                                   | 350                                     | 559                                            | 0.75                     | 419.25                         |                                |                    | 529.95                              | -110.70                        | -147.10                          | -257.80                       |         |
| 43               | 1971 | Li Shucheng                       | 1               | poor peasant             | 25                    | 3                      | 2                     | 1                       | 7                              |                           | 1                         | 6                              | 68                                     | 886                       | 171                              | 1057                   | 33                                   | 8                                    | 28                                      | 69                              |                                                       | 68                                       | 34                         | 2312                                          | 988                                            | 0.7                       | 691.6                                        |                     | 3003.6                                       | 429                                |                                   | 350                                     | 988                                            | 0.75                     | 741.00                         |                                |                    | 608.93                              | 132.07                         | 88.33                            | 220.40                        |         |
| 44               | 1971 | Wang Guiying                      | 1               | low-middle-class peasant | 17                    | 2                      | 1                     | 1                       | 2                              |                           |                           | 2                              | 20                                     | 493                       | 60                               | 553                    | 22                                   | 5                                    | 8                                       | 35                              |                                                       | 20                                       | 34                         | 680                                           | 518                                            | 0.7                       | 362.6                                        |                     | 1042.6                                       | 521                                |                                   | 100                                     | 418                                            | 0.75                     | 313.50                         |                                |                    | 244.26                              | 69.24                          | 60.66                            | 129.90                        |         |



(cont.)

| Household number | Year | Name of the head of the household | Production team | Class status (1)           | Basic work points (2) | Total labor forces (3) | Male labor forces (4) | Female labor forces (5) | Total household population (6) | Age: 1 to 3 years old (7) | Age: 4 to 7 years old (8) | Age: 8 years old and above (9) | Work points of grain distribution (10) | Laboring work points (11) | Farmyard manure work points (12) | Total work points (13) | Work points of compulsory labor (14) | Work points of help cultivation (15) | Work points of private plots labor (16) | Total deducted work points (17) | Actual workdays of participation in distribution (18) | Workpoints for rations distribution (19) | Rations per workpoint (20) | Total rations received from distribution (21) | Workdays of participation in distribution (22) | Grains per workpoint (23) | Total grains distributed by work-points (24) | Grains subsidy (25) | Total Grains received from distribution (26) | Distributed grains per person (27) | Distributed grains per adult (28) | Grains received from private plots (29) | Workdays of participation in distribution (30) | Value per workpoint (31) | Total value of workpoints (32) | Money used for investment (33) | Sum of income (34) | Money distributed in this year (34) | Deposit/debt of this year (35) | Deposit/debt over the years (36) | Accumulated deposit/debt (37) |         |
|------------------|------|-----------------------------------|-----------------|----------------------------|-----------------------|------------------------|-----------------------|-------------------------|--------------------------------|---------------------------|---------------------------|--------------------------------|----------------------------------------|---------------------------|----------------------------------|------------------------|--------------------------------------|--------------------------------------|-----------------------------------------|---------------------------------|-------------------------------------------------------|------------------------------------------|----------------------------|-----------------------------------------------|------------------------------------------------|---------------------------|----------------------------------------------|---------------------|----------------------------------------------|------------------------------------|-----------------------------------|-----------------------------------------|------------------------------------------------|--------------------------|--------------------------------|--------------------------------|--------------------|-------------------------------------|--------------------------------|----------------------------------|-------------------------------|---------|
| 45               | 1971 | Zuo Yunxian                       | 1               | upper-middle-class peasant | 41                    | 5                      | 2                     | 3                       | 9                              |                           |                           | 9                              | 90                                     | 1335                      | 101                              | 1436                   | 53                                   | 12                                   | 36                                      | 101                             |                                                       | 90                                       | 34                         | 3060                                          | 1335                                           | 0.7                       | 934.5                                        |                     | 3994.5                                       |                                    | 444                               |                                         | 450                                            | 1335                     | 0.75                           | 1001.25                        |                    |                                     | 904.53                         | 96.72                            | 338.16                        | 434.88  |
| 46               | 1971 | Gao Peijie                        | 1               | poor peasant               | 10                    | 1                      | 1                     | 0                       | 2                              |                           |                           | 2                              | 20                                     | 315                       |                                  | 315                    | 13                                   | 3                                    | 8                                       | 24                              |                                                       | 20                                       | 34                         | 680                                           | 291                                            | 0.7                       | 203.7                                        |                     | 883.7                                        |                                    | 442                               |                                         | 100                                            | 291                      | 0.75                           | 218.25                         |                    |                                     | 207.68                         | 10.57                            | 23.74                         | 34.31   |
| 47               | 1971 | Wang Qisheng                      | 1               | poor peasant               | 17                    | 2                      | 1                     | 1                       | 5                              |                           | 1                         | 4                              | 48                                     | 376                       | 50                               | 426                    | 22                                   | 5                                    | 20                                      | 47                              |                                                       | 48                                       | 34                         | 1632                                          | 379                                            | 0.7                       | 265.3                                        |                     | 1897.3                                       |                                    | 379                               |                                         | 250                                            | 379                      | 0.75                           | 284.25                         |                    |                                     | 372.90                         | -88.65                           | -438.95                       | -527.60 |
| 48               | 1971 | Chen Yuzhong                      | 2               | poor peasant               | 24                    | 3                      | 1                     | 2                       | 6                              |                           | 1                         | 5                              | 58                                     | 580                       | 90                               | 670                    | 31                                   | 7                                    | 24                                      | 62                              |                                                       | 58                                       | 34                         | 1972                                          | 608                                            | 0.7                       | 425.6                                        |                     | 2397.6                                       |                                    | 400                               |                                         | 300                                            | 608                      | 0.75                           | 456.00                         |                    |                                     | 442.28                         | 13.72                            | -454.36                       | -440.64 |
| 49               | 1971 | Meng Tianchang                    | 2               | poor peasant               | 17                    | 2                      | 1                     | 1                       | 5                              | 2                         | 1                         | 2                              | 40                                     | 380                       | 25                               | 405                    | 20                                   | 5                                    | 20                                      | 45                              |                                                       | 40                                       | 34                         | 1360                                          | 360                                            | 0.7                       | 252                                          |                     | 1612                                         |                                    | 322                               |                                         | 250                                            | 360                      | 0.75                           | 270.00                         |                    |                                     | 370.21                         | -100.21                          | -59.34                        | -159.55 |
| 50               | 1971 | Wang Xizhi                        | 2               | middle-class peasant       | 22                    | 3                      | 1                     | 2                       | 6                              |                           |                           | 6                              | 60                                     | 750                       | 99                               | 849                    | 29                                   | 7                                    | 24                                      | 60                              |                                                       | 60                                       | 34                         | 2040                                          | 789                                            | 0.7                       | 552.3                                        |                     | 2592.3                                       |                                    | 432                               |                                         | 300                                            | 789                      | 0.75                           | 591.75                         |                    |                                     | 468.16                         | 123.59                           | -164.18                       | -40.59  |
| 51               | 1971 | Jia Jinkui                        | 2               | low-middle-class peasant   |                       |                        |                       |                         | 2                              |                           |                           | 2                              | 20                                     |                           | 10                               | 10                     |                                      |                                      | 8                                       | 8                               |                                                       | 20                                       | 34                         | 680                                           | 2                                              | 0.7                       | 1.4                                          |                     | 681.4                                        |                                    | 341                               |                                         | 100                                            | 2                        | 0.75                           | 1.50                           |                    |                                     | 130.56                         | -129.06                          | -632.61                       | -761.67 |
| 52               | 1971 | Ji Yunxian                        | 2               | poor peasant               | 10                    | 1                      | 1                     | 0                       | 1                              |                           |                           | 1                              | 10                                     | 275                       | 5                                | 280                    | 13                                   | 3                                    | 4                                       | 20                              |                                                       | 10                                       | 34                         | 340                                           | 260                                            | 0.7                       | 182                                          |                     | 522                                          |                                    | 522                               |                                         | 50                                             | 260                      | 0.75                           | 195.00                         |                    |                                     | 153.00                         | 42.00                            | -145.46                       | -103.46 |
| 53               | 1971 | Zhang Yumei                       | 1               | poor peasant               | 31                    | 4                      | 1                     | 3                       | 5                              |                           |                           | 5                              | 50                                     | 318                       | 71                               | 389                    | 40                                   | 9                                    | 20                                      | 69                              |                                                       | 50                                       | 34                         | 1700                                          | 320                                            | 0.7                       | 224                                          |                     | 1924                                         |                                    | 385                               |                                         | 250                                            | 320                      | 0.75                           | 240.00                         | 95.00              |                                     | 290.97                         | 44.03                            | -60.26                        | -16.23  |
| 54               | 1971 | Wang Jishi                        | 1               | middle-class peasant       | 32                    | 4                      | 2                     | 2                       | 4                              |                           |                           | 4                              | 40                                     | 1049                      | 45                               | 1094                   | 42                                   | 10                                   | 16                                      | 68                              |                                                       | 40                                       | 34                         | 1360                                          | 1026                                           | 0.7                       | 718.2                                        |                     | 2078.2                                       |                                    | 520                               |                                         | 200                                            | 1026                     | 0.75                           | 769.50                         | 27.36              |                                     | 591.41                         | 205.45                           | 542.44                        | 747.89  |
| 55               | 1971 | Mu Zhaosheng                      | 2               | middle-class peasant       | 17                    | 2                      | 1                     | 1                       | 5                              | 1                         | 1                         | 3                              | 44                                     | 463                       | 25                               | 488                    | 22                                   | 5                                    | 20                                      | 47                              |                                                       | 44                                       | 34                         | 1496                                          | 441                                            | 0.7                       | 308.7                                        | 100                 | 1904.7                                       |                                    | 381                               |                                         | 250                                            | 446                      | 0.75                           | 334.50                         |                    |                                     | 366.04                         | -31.54                           | 26.74                         | -4.80   |
| 56               | 1971 | Li Cuilan                         | 2               | middle-class peasant       | 7                     | 1                      | 0                     | 1                       | 3                              |                           | 1                         | 2                              | 28                                     | 150                       | 9                                | 159                    | 10                                   | 2                                    | 12                                      | 24                              |                                                       | 28                                       | 34                         | 952                                           | 135                                            | 0.7                       | 94.5                                         |                     | 1046.5                                       |                                    | 349                               |                                         | 150                                            | 135                      | 0.75                           | 101.25                         | 135.00             |                                     | 171.03                         | 65.22                            | -51.10                        | 14.12   |
| 57               | 1971 | Ma Shanming                       | 2               | middle-class peasant       | 17                    | 2                      | 1                     | 1                       | 7                              | 1                         |                           | 6                              | 66                                     | 480                       | 56                               | 536                    | 22                                   | 5                                    | 28                                      | 55                              |                                                       | 66                                       | 34                         | 2244                                          | 481                                            | 0.7                       | 336.7                                        |                     | 2580.7                                       |                                    | 369                               |                                         | 350                                            | 484                      | 0.75                           | 363.00                         |                    |                                     | 440.10                         | -77.10                           | -750.14                       | -827.24 |
| 58               | 1971 | Liang Xiulan                      | 2               | middle-class peasant       | 17                    | 2                      | 1                     | 1                       | 4                              |                           |                           | 4                              | 40                                     | 443                       | 55                               | 498                    | 22                                   | 5                                    | 16                                      | 43                              |                                                       | 40                                       | 34                         | 1360                                          | 455                                            | 0.7                       | 318.5                                        |                     | 1678.5                                       |                                    | 420                               |                                         | 200                                            | 455                      | 0.75                           | 341.25                         | 20.00              |                                     | 280.95                         | 80.30                            | -69.40                        | 10.90   |
| 59               | 1971 | Cui Yongchang                     | 1               | poor peasant               | 15                    | 2                      | 1                     | 1                       | 5                              |                           |                           | 5                              | 50                                     | 488                       | 62                               | 550                    | 20                                   | 5                                    | 20                                      | 45                              |                                                       | 50                                       | 34                         | 1700                                          | 505                                            | 0.7                       | 353.5                                        |                     | 2053.5                                       |                                    | 411                               |                                         | 250                                            | 505                      | 0.75                           | 378.75                         |                    |                                     | 375.04                         | 3.71                             | -244.93                       | -241.22 |
| 60               | 1971 | Zhang Hengshou                    | 1               | low-middle-class peasant   | 20                    | 3                      | 1                     | 2                       | 7                              | 1                         | 1                         | 5                              | 64                                     | 575                       | 80                               | 655                    | 24                                   | 6                                    | 28                                      | 58                              |                                                       | 64                                       | 34                         | 2176                                          | 597                                            | 0.7                       | 417.9                                        | 210                 | 2803.9                                       |                                    | 401                               |                                         | 350                                            | 602                      | 0.75                           | 451.50                         | 60.00              |                                     | 510.61                         | 0.89                             | -256.62                       | -255.73 |
| 61               | 1971 | Zhao Yingtong                     | 1               | poor peasant               | 20                    | 3                      | 1                     | 2                       | 6                              | 1                         |                           | 5                              | 56                                     | 736                       | 82                               | 818                    | 26                                   | 6                                    | 24                                      | 56                              |                                                       | 56                                       | 34                         | 1904                                          | 762                                            | 0.7                       | 533.4                                        |                     | 2437.4                                       |                                    | 406                               |                                         | 300                                            | 762                      | 0.75                           | 571.50                         | 1.78               |                                     | 544.13                         | 29.15                            | 74.99                         | 104.14  |
| 62               | 1971 | Wu Xinggui                        | 1               | poor peasant               | 17                    | 2                      | 1                     | 1                       | 4                              | 2                         |                           | 2                              | 32                                     | 470                       | 39                               | 509                    | 19                                   | 5                                    | 16                                      | 40                              |                                                       | 32                                       | 34                         | 1088                                          | 469                                            | 0.7                       | 328.3                                        |                     | 1416.3                                       |                                    | 354                               |                                         | 200                                            | 469                      | 0.75                           | 351.75                         |                    |                                     | 313.10                         | 38.65                            | -120.94                       | -82.29  |
| 63               | 1971 | Wang Youfeng                      | 1               | poor peasant               | 3                     | 1                      | 0                     | 1                       | 3                              |                           |                           | 3                              | 30                                     | 198                       | 36                               | 234                    | 4                                    | 1                                    | 12                                      | 17                              |                                                       | 30                                       | 34                         | 1020                                          | 217                                            | 0.7                       | 151.9                                        |                     | 1171.9                                       |                                    | 391                               |                                         | 150                                            | 217                      | 0.75                           | 162.75                         |                    |                                     | 208.34                         | -45.59                           | -76.52                        | -122.11 |
| 64               | 1971 | Wang Qingsheng                    | 1               | poor peasant               | 10                    | 1                      | 1                     | 0                       | 2                              |                           |                           | 2                              | 20                                     | 320                       | 10                               | 330                    |                                      |                                      | 8                                       | 8                               |                                                       | 20                                       | 34                         | 680                                           | 322                                            | 0.7                       | 225.4                                        |                     | 905.4                                        |                                    | 453                               |                                         | 100                                            | 322                      | 0.75                           | 241.50                         |                    |                                     | 254.46                         | -12.96                           | 206.74                        | 193.78  |
| 65               | 1971 | Li Yulin                          | 1               | middle-class peasant       | 7                     | 1                      | 0                     | 1                       | 3                              |                           |                           | 3                              | 30                                     | 619                       | 26                               | 645                    | 10                                   | 2                                    | 12                                      | 24                              |                                                       | 30                                       | 34                         | 1020                                          | 621                                            | 0.7                       | 434.7                                        |                     | 1454.7                                       |                                    | 485                               |                                         | 150                                            | 621                      | 0.75                           | 465.75                         |                    |                                     | 382.07                         | 83.68                            | 275.98                        | 359.66  |

(cont.)

| Household number | Year | Name of the head of the household | Production team | Class status (1)         | Basic work points (2) | Total labor forces (3) | Male labor forces (4) | Female labor forces (5) | Total household population (6) | Age: 1 to 3 years old (7) | Age: 4 to 7 years old (8) | Age: 8 years old and above (9) | Work points of grain distribution (10) | Laboring work points (11) | Farmyard manure work points (12) | Total work points (13) | Work points of compulsory labor (14) | Work points of help cultivation (15) | Work points of private plots labor (16) | Total deducted work points (17) | Acutal workdays of participation in distribution (18) | Workpoints for rations distribution (19) | Rations per workpoint (20) | Total rations received form distribution (21) | Workdays of participation in distribu-tion (22) | Grains per workpoint (23) | Total grains distributed by work-points (24) | Grains subsidy (25) | Total Grains received from distribution (26) | Distributed grains per person (27) | Distributed grains per adult (28) | Grains received from privated plots (29) | Workdays of participation in distribution (30) | Value per workpoint (31) | Total value of workpoints (32) | Money used for investment (33) | Sum of income (34) | Money distributed in this year (34) | Deposit/ debt of this year (35) | Deposit/ debt over the years (36) | Accumulated deposit/debt (37) |
|------------------|------|-----------------------------------|-----------------|--------------------------|-----------------------|------------------------|-----------------------|-------------------------|--------------------------------|---------------------------|---------------------------|--------------------------------|----------------------------------------|---------------------------|----------------------------------|------------------------|--------------------------------------|--------------------------------------|-----------------------------------------|---------------------------------|-------------------------------------------------------|------------------------------------------|----------------------------|-----------------------------------------------|-------------------------------------------------|---------------------------|----------------------------------------------|---------------------|----------------------------------------------|------------------------------------|-----------------------------------|------------------------------------------|------------------------------------------------|--------------------------|--------------------------------|--------------------------------|--------------------|-------------------------------------|---------------------------------|-----------------------------------|-------------------------------|
| 66               | 1971 | Zuo Chunlan                       | 1               | middle-class peasant     | 7                     | 1                      | 0                     | 1                       | 6                              | 1                         | 1                         | 4                              | 54                                     | 10                        | 76                               | 86                     | 10                                   | 2                                    | 24                                      | 36                              |                                                       | 54                                       | 34                         | 1836                                          | 50                                              | 0.7                       | 35                                           | 95                  | 1966                                         | 328                                |                                   | 300                                      | 50                                             | 0.75                     | 37.50                          | 445.00                         |                    | 316.61                              | 165.89                          | -259.21                           | -93.32                        |
| 67               | 1971 | Gao Chongji                       | 1               | poor peasant             | 42                    | 5                      | 3                     | 2                       | 9                              |                           |                           | 9                              | 90                                     | 1352                      | 134                              | 1486                   | 55                                   | 13                                   | 104                                     | 172                             |                                                       | 90                                       | 34                         | 3060                                          | 1314                                            | 0.7                       | 919.8                                        |                     | 3979.8                                       | 442                                |                                   | 450                                      | 1382                                           | 0.75                     | 1036.50                        |                                | 915.63             | 120.87                              | 479.13                          | 600.00                            |                               |
| 68               | 1971 | Gao Chongwen                      | 1               | poor peasant             | 32                    | 4                      | 2                     | 2                       | 8                              | 1                         | 1                         | 6                              | 74                                     | 913                       | 108                              | 1021                   | 42                                   | 10                                   | 32                                      | 84                              |                                                       | 74                                       | 34                         | 2516                                          | 937                                             | 0.7                       | 655.9                                        |                     | 3171.9                                       | 396                                |                                   | 400                                      | 937                                            | 0.75                     | 702.75                         | 1.78                           | 601.08             | 103.45                              | -884.53                         | -781.08                           |                               |
| 69               | 1971 | Gao Peiren                        | 1               | poor peasant             | 23                    | 3                      | 2                     | 1                       | 8                              | 1                         |                           |                                | 76                                     | 887                       | 92                               | 979                    | 30                                   | 7                                    | 32                                      | 69                              |                                                       | 76                                       | 34                         | 2584                                          | 910                                             | 0.7                       | 637                                          |                     | 3221                                         | 403                                |                                   | 400                                      | 910                                            | 0.75                     | 682.50                         | 45.00                          | 650.08             | 77.42                               | -444.23                         | -366.81                           |                               |
| 70               | 1971 | Wang Jingyi                       | 1               | low-middle-class peasant | 16                    | 3                      | 1                     | 2                       | 4                              |                           |                           | 4                              | 40                                     | 916                       | 81                               | 997                    | 21                                   | 5                                    | 16                                      | 42                              |                                                       | 40                                       | 34                         | 1360                                          | 955                                             | 0.7                       | 668.5                                        |                     | 2028.5                                       | 507                                |                                   | 200                                      | 955                                            | 0.75                     | 716.25                         |                                | 549.67             | 166.58                              | 414.63                          | 581.21                            |                               |
| 71               | 1971 | Wang Shutang                      | 1               | low-middle-class peasant | 17                    | 2                      | 1                     | 1                       | 4                              |                           | 2                         | 2                              | 36                                     | 478                       | 57                               | 535                    | 22                                   | 5                                    | 16                                      | 43                              |                                                       | 36                                       | 34                         | 1224                                          | 492                                             | 0.7                       | 344.4                                        |                     | 1568.4                                       | 392                                |                                   | 200                                      | 492                                            | 0.75                     | 369.00                         |                                | 332.40             | 36.60                               | 28.18                           | 64.78                             |                               |
| 72               | 1971 | Meng Peizhong                     | 1               | middle-class peasant     | 8                     | 1                      | 1                     | 0                       | 1                              |                           |                           | 1                              | 10                                     | 345                       | 5                                | 350                    | 10                                   | 2                                    | 4                                       | 16                              |                                                       | 10                                       | 34                         | 340                                           | 334                                             | 0.7                       | 233.8                                        |                     | 573.8                                        | 574                                |                                   | 50                                       | 334                                            | 0.75                     | 250.50                         |                                | 230.23             | 20.27                               | 267.05                          | 287.32                            |                               |
| 73               | 1971 | Meng Peixing                      | 1               | middle-class peasant     | 13                    | 2                      | 1                     | 1                       | 4                              |                           |                           | 4                              | 40                                     | 418                       | 103                              | 521                    | 17                                   | 4                                    | 16                                      | 37                              |                                                       | 40                                       | 34                         | 1360                                          | 484                                             | 0.7                       | 338.8                                        |                     | 1698.8                                       | 425                                |                                   | 200                                      | 484                                            | 0.75                     | 363.00                         | 27.36                          | 205.63             | 184.73                              | 30.67                           | 215.40                            |                               |
| 74               | 1971 | Meng Mingbiao                     | 1               | middle-class peasant     | 17                    | 2                      | 1                     | 1                       | 6                              | 1                         | 1                         | 4                              | 54                                     | 385                       | 30                               | 415                    | 22                                   | 5                                    | 24                                      | 51                              |                                                       | 54                                       | 34                         | 1836                                          | 364                                             | 0.7                       | 254.8                                        |                     | 2090.8                                       | 348                                |                                   | 300                                      | 364                                            | 0.75                     | 273.00                         |                                | 506.19             | -233.19                             | 6.37                            | -226.82                           |                               |
| 75               | 1971 | Xue Yuhua                         | 1               | poor peasant             | 7                     | 1                      | 0                     | 1                       | 3                              |                           |                           | 3                              | 30                                     | 88                        | 41                               | 129                    | 9                                    | 2                                    | 12                                      | 23                              |                                                       | 30                                       | 34                         | 1020                                          | 106                                             | 0.7                       | 74.2                                         | 105                 | 1199.2                                       | 400                                |                                   | 150                                      | 106                                            | 0.75                     | 79.50                          |                                | 190.07             | -110.57                             | -113.64                         | -224.21                           |                               |
| 76               | 1971 | Wang Chuanai                      | 1               | middle-class peasant     | 7                     | 1                      | 0                     | 1                       | 4                              | 1                         | 1                         | 2                              | 34                                     | 4                         | 30                               | 34                     | 9                                    | 2                                    | 16                                      | 27                              |                                                       | 34                                       | 34                         | 1156                                          | 7                                               | 0.7                       | 4.9                                          | 120                 | 1280.9                                       | 320                                |                                   | 200                                      | 7                                              | 0.75                     | 5.25                           | 264.00                         | 209.06             | 60.19                               | -253.87                         | -193.68                           |                               |
| 77               | 1971 | Wang Zhenguo                      | 1               | low-middle-class peasant | 28                    | 4                      | 2                     | 2                       | 9                              | 1                         | 2                         | 6                              | 82                                     | 910                       | 139                              | 1049                   | 36                                   | 8                                    | 36                                      | 80                              |                                                       | 82                                       | 34                         | 2788                                          | 969                                             | 0.7                       | 678.3                                        |                     | 3466.3                                       | 385                                |                                   | 450                                      | 969                                            | 0.75                     | 726.75                         |                                | 687.83             | 38.92                               | -133.46                         | -94.54                            |                               |
| 78               | 1971 | Mu Shouquan                       | 1               | poor peasant             | 3                     | 1                      | 0                     | 1                       | 2                              |                           |                           | 2                              | 20                                     | 422                       | 3                                | 425                    | 4                                    | 1                                    | 8                                       | 13                              |                                                       | 20                                       | 34                         | 680                                           | 412                                             | 0.7                       | 288.4                                        |                     | 968.4                                        | 484                                |                                   | 100                                      | 412                                            | 0.75                     | 309.00                         |                                | 256.16             | 52.84                               | 205.51                          | 258.35                            |                               |
| 79               | 1971 | Mu Zhaozheng                      | 1               | poor peasant             | 17                    | 2                      | 1                     | 1                       | 5                              | 1                         | 1                         | 3                              | 44                                     | 515                       | 93                               | 608                    | 20                                   | 5                                    | 20                                      | 45                              |                                                       | 44                                       | 34                         | 1496                                          | 563                                             | 0.7                       | 394.1                                        |                     | 1890.1                                       | 378                                |                                   | 250                                      | 563                                            | 0.75                     | 422.25                         |                                | 430.67             | -8.42                               | 174.79                          | 166.37                            |                               |
| 80               | 1971 | Ma Likui                          | 1               | poor peasant             | 25                    | 3                      | 2                     | 1                       | 6                              |                           |                           | 6                              | 60                                     | 792                       | 64                               | 856                    | 33                                   | 8                                    | 24                                      | 65                              |                                                       | 60                                       | 34                         | 2040                                          | 791                                             | 0.7                       | 553.7                                        |                     | 2593.7                                       | 432                                |                                   | 300                                      | 791                                            | 0.75                     | 593.25                         |                                | 563.78             | 29.47                               | 222.37                          | 251.84                            |                               |
| 81               | 1971 | Ma Xiulan                         | 1               | middle-class peasant     | 7                     | 1                      | 0                     | 1                       | 5                              | 1                         | 1                         | 3                              | 44                                     | 126                       | 38                               | 164                    | 9                                    | 2                                    | 20                                      | 31                              |                                                       | 44                                       | 34                         | 1496                                          | 133                                             | 0.7                       | 93.1                                         | 10                  | 1599.1                                       | 320                                |                                   | 250                                      | 133                                            | 0.75                     | 99.75                          | 340.00                         | 253.93             | 185.82                              | -147.35                         | 38.47                             |                               |
| 82               | 1971 | Wang Dianjie                      | 1               | middle-class peasant     | 25                    | 3                      | 2                     | 1                       | 8                              | 1                         | 2                         | 5                              | 72                                     | 868                       | 105                              | 973                    | 31                                   | 8                                    | 32                                      | 71                              |                                                       | 72                                       | 34                         | 2448                                          | 902                                             | 0.7                       | 631.4                                        | 124                 | 3203.4                                       | 400                                |                                   | 400                                      | 902                                            | 0.75                     | 676.50                         |                                | 598.26             | 78.24                               | -226.71                         | -148.47                           |                               |
| 83               | 1971 | Wang Litang                       | 1               | low-middle-class peasant | 17                    | 2                      | 1                     | 1                       | 8                              | 1                         | 1                         | 6                              | 74                                     | 1047                      | 77                               | 1124                   | 22                                   | 5                                    | 32                                      | 59                              |                                                       | 74                                       | 34                         | 2516                                          | 1065                                            | 0.7                       | 745.5                                        |                     | 3261.5                                       | 408                                |                                   | 400                                      | 1065                                           | 0.75                     | 798.75                         | 8.98                           | 691.21             | 116.52                              | -134.00                         | -17.48                            |                               |
| 84               | 1971 | Wei Zhaoliang                     | 1               | low-middle-class peasant | 15                    | 2                      | 1                     | 1                       | 4                              |                           |                           | 4                              | 40                                     | 522                       | 66                               | 588                    | 22                                   | 5                                    | 16                                      | 43                              |                                                       | 40                                       | 34                         | 1360                                          | 545                                             | 0.7                       | 381.5                                        |                     | 1741.5                                       | 435                                |                                   | 200                                      | 547                                            | 0.75                     | 410.25                         |                                | 374.95             | 35.30                               | 61.83                           | 97.13                             |                               |

(cont.)

| Household number | Year | Name of the head of the household | Production team | Class status (1)         | Basic work points (2) | Total labor forces (3) | Male labor forces (4) | Female labor forces (5) | Total household population (6) | Age: 1 to 3 years old (7) | Age: 4 to 7 years old (8) | Age: 8 years old and above (9) | Work points of grain distribution (10) | Laboring work points (11) | Farmyard manure work points (12) | Total work points (13) | Work points of compulsory labor (14) | Work points of help cultivation (15) | Work points of private plots labor (16) | Total deducted work points (17) | Actual workdays of participation in distribution (18) | Workpoints for rations distribution (19) | Rations per workpoint (20) | Total rations received from distribution (21) | Workdays of participation in distribution (22) | Grains per workpoint (23) | Total grains distributed by work-points (24) | Grains subsidy (25) | Total Grains received from distribution (26) | Distributed grains per person (27) | Distributed grains per adult (28) | Grains received from private plots (29) | Workdays of participation in distribution (30) | Value per workpoint (31) | Total value of workpoints (32) | Money used for investment (33) | Sum of income (34) | Money distributed in this year (34) | Deposit/debt of this year (35) | Deposit/debt over the years (36) | Accumulated deposit/debt (37) |
|------------------|------|-----------------------------------|-----------------|--------------------------|-----------------------|------------------------|-----------------------|-------------------------|--------------------------------|---------------------------|---------------------------|--------------------------------|----------------------------------------|---------------------------|----------------------------------|------------------------|--------------------------------------|--------------------------------------|-----------------------------------------|---------------------------------|-------------------------------------------------------|------------------------------------------|----------------------------|-----------------------------------------------|------------------------------------------------|---------------------------|----------------------------------------------|---------------------|----------------------------------------------|------------------------------------|-----------------------------------|-----------------------------------------|------------------------------------------------|--------------------------|--------------------------------|--------------------------------|--------------------|-------------------------------------|--------------------------------|----------------------------------|-------------------------------|
| 85               | 1971 | Yang Zhongwen                     | 1               | middle-class peasant     |                       |                        |                       |                         | 2                              |                           |                           | 2                              | 20                                     |                           | 24                               | 24                     |                                      |                                      | 8                                       | 8                               |                                                       | 20                                       | 34                         | 680                                           | 16                                             | 0.7                       | 11.2                                         |                     | 691.2                                        | 346                                |                                   | 100                                     | 16                                             | 0.75                     | 12.00                          |                                |                    | 133.74                              | -121.74                        | -411.98                          | -533.72                       |
| 86               | 1971 | Zhu Guangchang                    | 2               | middle-class peasant     | 17                    | 2                      | 1                     | 1                       | 4                              |                           |                           | 4                              | 40                                     | 638                       | 77                               | 715                    | 22                                   | 5                                    | 16                                      | 43                              |                                                       | 40                                       | 34                         | 1360                                          | 672                                            | 0.7                       | 470.4                                        |                     | 1830.4                                       | 458                                |                                   | 200                                     | 672                                            | 0.75                     | 504.00                         |                                |                    | 422.12                              | 81.88                          | 156.64                           | 238.52                        |
| 87               | 1971 | Yang Yugui                        | 1               | middle-class peasant     | 10                    | 1                      | 1                     | 0                       | 3                              |                           |                           | 3                              | 30                                     | 358                       | 33                               | 391                    | 13                                   | 3                                    | 12                                      | 28                              |                                                       | 30                                       | 34                         | 1020                                          | 363                                            | 0.7                       | 254.1                                        |                     | 1274.1                                       | 425                                |                                   | 150                                     | 363                                            | 0.75                     | 272.25                         |                                |                    | 372.61                              | -100.36                        | -6.48                            | -106.84                       |
| 88               | 1971 | Yang Yingzhou                     | 2               | middle-class peasant     | 17                    | 2                      | 1                     | 1                       | 3                              |                           |                           | 3                              | 30                                     | 443                       | 74                               | 517                    | 22                                   | 5                                    | 12                                      | 39                              |                                                       | 30                                       | 34                         | 1020                                          | 478                                            | 0.7                       | 334.6                                        | 150                 | 1504.6                                       | 502                                |                                   | 150                                     | 478                                            | 0.75                     | 358.50                         |                                |                    | 412.40                              | -53.90                         | 162.84                           | 108.94                        |
| 89               | 1971 | Li Kailiang                       | 1               | poor peasant             |                       |                        |                       |                         | 2                              |                           |                           | 2                              | 20                                     | 190                       | 31                               | 221                    |                                      |                                      | 8                                       | 8                               |                                                       | 20                                       | 34                         | 680                                           | 213                                            | 0.7                       | 149.1                                        | 10                  | 839.1                                        | 420                                |                                   | 100                                     | 213                                            | 0.75                     | 159.75                         |                                |                    | 241.08                              | -81.33                         | 217.03                           | 135.70                        |
| 90               | 1971 | Li Kaigong                        | 1               | poor peasant             | 6                     | 2                      | 0                     | 2                       | 3                              |                           |                           | 3                              | 30                                     | 601                       | 27                               | 628                    | 5                                    | 2                                    | 12                                      | 19                              |                                                       | 30                                       | 34                         | 1020                                          | 609                                            | 0.7                       | 426.3                                        |                     | 1446.3                                       | 482                                |                                   | 150                                     | 609                                            | 0.75                     | 456.75                         |                                |                    | 352.06                              | 104.69                         | 127.38                           | 232.07                        |
| 91               | 1971 | Meng Jingcan                      | 1               | poor peasant             | 7                     | 1                      | 0                     | 1                       | 5                              | 1                         |                           | 4                              | 46                                     | 206                       | 45                               | 251                    | 9                                    | 2                                    | 20                                      | 31                              |                                                       | 46                                       | 34                         | 1564                                          | 220                                            | 0.7                       | 154                                          |                     | 1718                                         | 344                                |                                   | 250                                     | 220                                            | 0.75                     | 165.00                         | 135.00                         |                    | 277.24                              | 22.76                          | -14.22                           | 8.54                          |
| 92               | 1971 | Fu Lidong                         | 1               | middle-class peasant     | 3                     | 1                      | 0                     | 1                       | 1                              |                           |                           | 1                              | 10                                     | 162                       | 29                               | 191                    | 4                                    | 1                                    | 4                                       | 9                               |                                                       | 10                                       | 34                         | 340                                           | 182                                            | 0.7                       | 127.4                                        |                     | 467.4                                        | 467                                |                                   | 50                                      | 182                                            | 0.75                     | 136.50                         |                                |                    | 101.44                              | 35.06                          | -1.58                            | 33.48                         |
| 93               | 1971 | Meng Peicheng                     | 1               | middle-class peasant     | 17                    | 2                      | 1                     | 1                       | 7                              | 1                         | 2                         | 4                              | 62                                     | 601                       | 61                               | 662                    | 22                                   | 5                                    | 28                                      | 55                              |                                                       | 62                                       | 34                         | 2108                                          | 607                                            | 0.7                       | 424.9                                        |                     | 2532.9                                       | 362                                |                                   | 350                                     | 607                                            | 0.75                     | 455.25                         |                                |                    | 506.04                              | -50.79                         | -657.91                          | -708.70                       |
| 94               | 1971 | Mu Shouwen                        | 1               | middle-class peasant     | 17                    | 2                      | 1                     | 1                       | 7                              | 1                         | 2                         | 4                              | 62                                     | 548                       | 80                               | 628                    | 20                                   | 5                                    | 28                                      | 53                              |                                                       | 62                                       | 34                         | 2108                                          | 575                                            | 0.7                       | 402.5                                        |                     | 2510.5                                       | 359                                |                                   | 350                                     | 575                                            | 0.75                     | 431.25                         |                                |                    | 508.73                              | -77.48                         | 75.11                            | -2.37                         |
| 95               | 1971 | Mu Zhaorui                        | 1               | middle-class peasant     | 17                    | 2                      | 1                     | 1                       | 2                              |                           |                           | 2                              | 20                                     | 496                       | 10                               | 506                    | 22                                   | 5                                    | 8                                       | 35                              |                                                       | 20                                       | 34                         | 680                                           | 471                                            | 0.7                       | 329.7                                        |                     | 1009.7                                       | 505                                |                                   | 100                                     | 471                                            | 0.75                     | 353.25                         |                                |                    | 300.36                              | 52.89                          | 250.12                           | 303.01                        |
| 96               | 1971 | Zhang Lirong                      | 1               | middle-class peasant     | 20                    | 3                      | 1                     | 2                       | 4                              | 1                         |                           | 3                              | 36                                     | 509                       | 75                               | 584                    | 26                                   | 6                                    | 16                                      | 48                              |                                                       | 36                                       | 34                         | 1224                                          | 536                                            | 0.7                       | 375.2                                        | 30                  | 1629.2                                       | 407                                |                                   | 200                                     | 536                                            | 0.75                     | 402.00                         |                                |                    | 412.31                              | -10.31                         | 323.43                           | 313.12                        |
| 97               | 1971 | Cui Yongfu                        | 1               | poor peasant             | 17                    | 2                      | 1                     | 1                       | 5                              |                           |                           | 5                              | 50                                     | 870                       | 92                               | 962                    | 22                                   | 5                                    | 20                                      | 47                              |                                                       | 50                                       | 34                         | 1700                                          | 915                                            | 0.7                       | 640.5                                        |                     | 2340.5                                       | 468                                |                                   | 250                                     | 915                                            | 0.75                     | 686.25                         |                                |                    | 516.64                              | 169.61                         | 207.18                           | 376.79                        |
| 98               | 1971 | Meng Lanying                      | 1               | poor peasant             |                       |                        |                       |                         | 1                              |                           |                           | 1                              | 10                                     | 4                         | 5                                | 9                      |                                      |                                      | 4                                       | 4                               |                                                       | 10                                       | 34                         | 340                                           | 5                                              | 0.7                       | 3.5                                          |                     | 343.5                                        | 344                                |                                   | 50                                      | 5                                              | 0.75                     | 3.75                           |                                |                    | 66.61                               | -62.86                         | -313.56                          | -376.42                       |
| 99               | 1971 | Cui Yiren                         | 1               | poor peasant             | 17                    | 2                      | 1                     | 1                       | 4                              | 1                         | 1                         | 2                              | 34                                     | 395                       | 79                               | 474                    | 22                                   | 5                                    | 16                                      | 43                              |                                                       | 34                                       | 34                         | 1156                                          | 431                                            | 0.7                       | 301.7                                        |                     | 1457.7                                       | 364                                |                                   | 200                                     | 431                                            | 0.75                     | 323.25                         |                                |                    | 327.58                              | -4.33                          | -3.76                            | -8.09                         |
| 100              | 1971 | Wang Qingde                       | 1               | low-middle-class peasant | 8                     | 1                      | 1                     | 0                       | 1                              |                           |                           | 1                              | 10                                     | 454                       | 5                                | 459                    | 10                                   | 2                                    | 4                                       | 16                              |                                                       | 10                                       | 34                         | 340                                           | 443                                            | 0.7                       | 310.1                                        |                     | 650.1                                        | 650                                |                                   | 50                                      | 443                                            | 0.75                     | 332.25                         |                                |                    | 254.19                              | 78.06                          | 302.11                           | 380.17                        |
| 101              | 1971 | Jin Lianyu                        | 1               | poor peasant             |                       |                        |                       |                         |                                |                           |                           | 1                              | 10                                     |                           |                                  | 0                      |                                      |                                      | 0                                       |                                 |                                                       | 10                                       | 34                         | 340                                           | 0                                              | 0.7                       | 0                                            | 10                  | 350                                          | 350                                |                                   | 50                                      |                                                | 0.75                     | 0.00                           |                                |                    | 103.74                              | -103.74                        | -819.81                          | -923.55                       |
| 102              | 1971 | Wang Qiyi                         | 1               | poor peasant             | 8                     | 1                      | 1                     | 0                       | 1                              |                           |                           | 1                              | 10                                     | 281                       | 5                                | 286                    | 10                                   | 2                                    | 4                                       | 16                              |                                                       | 10                                       | 34                         | 340                                           | 270                                            | 0.7                       | 189                                          |                     | 529                                          | 529                                |                                   | 50                                      | 270                                            | 0.75                     | 202.50                         | 1.78                           |                    | 158.65                              | 45.63                          | 106.58                           | 152.21                        |
| 103              | 1971 | Yang Chengye                      | 1               | poor peasant             | 8                     | 1                      | 1                     | 0                       | 1                              |                           |                           | 1                              | 10                                     | 129                       | 5                                | 134                    | 10                                   | 2                                    | 4                                       | 16                              |                                                       | 10                                       | 34                         | 340                                           | 118                                            | 0.7                       | 82.6                                         |                     | 422.6                                        | 423                                |                                   | 50                                      | 118                                            | 0.75                     | 88.50                          |                                |                    | 95.55                               | -7.05                          | 100.33                           | 93.28                         |
| 104              | 1971 | Meng Mingjian                     | 1               | poor peasant             | 18                    | 1                      | 1                     | 0                       | 3                              |                           |                           | 3                              | 30                                     | 402                       | 109                              | 511                    | 10                                   | 2                                    | 12                                      | 24                              |                                                       | 30                                       | 34                         | 1020                                          | 487                                            | 0.7                       | 340.9                                        |                     | 1360.9                                       | 454                                |                                   | 150                                     | 487                                            | 0.75                     | 365.25                         |                                |                    | 359.31                              | 5.94                           | 30.15                            | 36.09                         |
| 105              | 1971 | Guo Yuexiang                      | 1               | poor peasant             | 7                     | 1                      | 0                     | 1                       | 5                              |                           | 1                         | 4                              | 48                                     | 180                       | 131                              | 311                    | 9                                    | 2                                    | 20                                      | 31                              |                                                       | 48                                       | 34                         | 1632                                          | 280                                            | 0.7                       | 196                                          |                     | 1828                                         | 366                                |                                   | 250                                     | 280                                            | 0.75                     | 210.00                         | 110.00                         |                    | 292.78                              | 27.22                          | -4.40                            | 22.82                         |
| 106              | 1971 | Wu Congchao                       | 2               | poor peasant             | 37                    | 5                      | 2                     | 3                       | 9                              | 2                         | 1                         | 6                              | 80                                     | 715                       | 134                              | 849                    | 42                                   | 11                                   | 36                                      | 89                              |                                                       | 80                                       | 34                         | 2720                                          | 760                                            | 0.7                       | 532                                          |                     | 3252                                         | 361                                |                                   | 450                                     | 756                                            | 0.75                     | 567.00                         |                                |                    | 587.96                              | -20.96                         | -406.10                          | -427.06                       |

(cont.)

| Household number | Year | Name of the head of the household | Production team | Class status (1)         | Basic work points (2) | Total labor forces (3) | Male labor forces (4) | Female labor forces (5) | Total household population (6) | Age: 1 to 3 years old (7) | Age: 4 to 7 years old (8) | Age: 8 years old and above (9) | Work points of grain distribution (10) | Laboring work points (11) | Farmyard manure work points (12) | Total work points (13) | Work points of compulsory labor (14) | Work points of help cultivation (15) | Work points of private plots labor (16) | Total deducted work points (17) | Acutal workdays of participation in distribution (18) | Workpoints for rations distribution (19) | Rations per workpoint (20) | Total rations received form distribution (21) | Workdays of participation in distribu-tion (22) | Grains per workpoint (23) | Total grains distributed by work-points (24) | Grains subsidy (25) | Total Grains received from distribution (26) | Distributed grains per person (27) | Distributed grains per adult (28) | Grains received from privated plots (29) | Workdays of participation in distribution (30) | Value per workpoint (31) | Total value of workpoints (32) | Money used for investment (33) | Sum of income (34) | Money distributed in this year (34) | Deposit/ debt of this year (35) | Deposit/ debt over the years (36) | Accumulated deposit/debt (37) |         |
|------------------|------|-----------------------------------|-----------------|--------------------------|-----------------------|------------------------|-----------------------|-------------------------|--------------------------------|---------------------------|---------------------------|--------------------------------|----------------------------------------|---------------------------|----------------------------------|------------------------|--------------------------------------|--------------------------------------|-----------------------------------------|---------------------------------|-------------------------------------------------------|------------------------------------------|----------------------------|-----------------------------------------------|-------------------------------------------------|---------------------------|----------------------------------------------|---------------------|----------------------------------------------|------------------------------------|-----------------------------------|------------------------------------------|------------------------------------------------|--------------------------|--------------------------------|--------------------------------|--------------------|-------------------------------------|---------------------------------|-----------------------------------|-------------------------------|---------|
| 107              | 1971 | Xie Yuzhen                        | 0               | poor peasant             |                       |                        |                       |                         | 1                              |                           |                           | 1                              | 10                                     |                           |                                  | 0                      |                                      |                                      | 4                                       | 4                               |                                                       | 10                                       | 34                         | 340                                           | 0                                               | 0.7                       | 0                                            |                     | 340                                          |                                    |                                   | 50                                       |                                                | 0.75                     | 0.00                           |                                |                    | 72.64                               | -72.64                          | -58.86                            | -131.50                       |         |
| 108              | 1971 | Wu Songlin                        | 1               | poor peasant             |                       |                        |                       |                         | 2                              |                           |                           | 2                              | 20                                     | 23                        | 41                               | 64                     |                                      |                                      | 8                                       | 8                               |                                                       | 20                                       | 34                         | 680                                           | 56                                              | 0.7                       | 39.2                                         |                     | 719.2                                        |                                    |                                   | 100                                      | 56                                             | 0.75                     | 42.00                          |                                |                    | 138.85                              | -96.85                          | -762.93                           | -859.78                       |         |
| 109              | 1971 | Yang Chunmei                      | 2               | poor peasant             | 17                    | 2                      | 1                     | 1                       | 6                              |                           | 1                         | 5                              | 58                                     | 280                       | 74                               | 354                    | 22                                   | 5                                    | 24                                      | 51                              |                                                       | 58                                       | 34                         | 1972                                          | 303                                             | 0.7                       | 212.1                                        |                     | 2184.1                                       |                                    |                                   | 300                                      | 303                                            | 0.75                     | 227.25                         |                                |                    | 370.06                              | -142.81                         | -640.70                           | -783.51                       |         |
| 110              | 1971 | Wu Yulan                          | 2               | poor peasant             | 7                     | 1                      | 0                     | 1                       | 5                              | 2                         |                           | 3                              | 42                                     | 237                       | 60                               | 297                    | 9                                    | 2                                    | 20                                      | 31                              |                                                       | 42                                       | 34                         | 1428                                          | 266                                             | 0.7                       | 186.2                                        |                     | 1614.2                                       |                                    |                                   | 250                                      | 266                                            | 0.75                     | 199.50                         |                                |                    | 249.71                              | -50.21                          | 131.09                            | 80.88                         |         |
| 111              | 1971 | Hua Suzhen                        | 1               | poor peasant             | 6                     | 2                      | 0                     | 2                       | 2                              |                           |                           | 2                              | 20                                     | 315                       | 33                               | 348                    | 8                                    | 2                                    | 8                                       | 18                              |                                                       | 20                                       | 34                         | 680                                           | 330                                             | 0.7                       | 231                                          |                     | 911                                          |                                    |                                   | 100                                      | 330                                            | 0.75                     | 247.50                         | 30.00                          |                    | 184.58                              | 92.92                           | -45.53                            | 47.39                         |         |
| 112              | 1971 | Song Liangxiang                   | 1               | poor peasant             | 7                     | 1                      | 0                     | 1                       | 1                              |                           |                           | 1                              | 10                                     | 124                       | 13                               | 137                    | 9                                    | 2                                    | 4                                       | 15                              |                                                       | 10                                       | 34                         | 340                                           | 122                                             | 0.7                       | 85.4                                         |                     | 425.4                                        |                                    |                                   | 50                                       | 122                                            | 0.75                     | 91.50                          |                                |                    | 67.16                               | 24.34                           | -2.63                             | 21.71                         |         |
| 113              | 1971 | Zhang Dongde                      | 1               | poor peasant             |                       |                        |                       |                         | 3                              |                           |                           | 3                              | 30                                     | 295                       | 46                               | 341                    |                                      |                                      | 12                                      | 12                              |                                                       | 30                                       | 34                         | 1020                                          | 329                                             | 0.7                       | 230.3                                        |                     | 1250.3                                       |                                    |                                   | 150                                      | 329                                            | 0.75                     | 246.75                         |                                |                    | 250.97                              | -4.22                           | 37.34                             | 33.12                         |         |
| 114              | 1971 | Zhang Zhenyuan                    | 2               | poor peasant             | 17                    | 2                      | 1                     | 1                       | 4                              | 2                         |                           | 2                              | 32                                     | 436                       | 14                               | 450                    | 19                                   | 5                                    | 16                                      | 40                              |                                                       | 32                                       | 34                         | 1088                                          | 410                                             | 0.7                       | 287                                          | 100                 | 1475                                         |                                    |                                   | 200                                      | 410                                            | 0.75                     | 307.50                         |                                |                    | 333.05                              | -25.55                          | 66.55                             | 41.00                         |         |
| 115              | 1971 | Meng Qingyun                      | 2               | poor peasant             | 8                     | 1                      | 1                     | 0                       | 1                              |                           |                           | 1                              | 10                                     | 333                       | 7                                | 340                    | 10                                   | 2                                    | 4                                       | 16                              |                                                       | 10                                       | 34                         | 340                                           | 324                                             | 0.7                       | 226.8                                        |                     | 566.8                                        |                                    |                                   | 50                                       | 324                                            | 0.75                     | 243.00                         |                                |                    | 198.06                              | 44.94                           | 254.16                            | 299.10                        |         |
| 116              | 1971 | Zhao Hongsheng                    | 1               | low-middle-class peasant | 27                    | 3                      | 2                     | 1                       | 6                              |                           |                           | 6                              | 60                                     | 837                       | 93                               | 930                    | 35                                   | 8                                    | 24                                      | 67                              |                                                       | 60                                       | 34                         | 2040                                          | 863                                             | 0.7                       | 604.1                                        |                     | 2644.1                                       |                                    |                                   | 300                                      | 863                                            | 0.75                     | 647.25                         | 95.00                          |                    | 564.33                              | 177.92                          | -164.90                           | 13.02                         |         |
| 117              | 1971 | Mneg Mingyou                      | 2               | poor peasant             | 10                    | 1                      | 1                     | 0                       | 1                              |                           |                           | 1                              | 10                                     | 395                       | 19                               | 414                    | 13                                   | 3                                    | 4                                       | 20                              |                                                       | 10                                       | 34                         | 340                                           | 394                                             | 0.7                       | 275.8                                        |                     | 615.8                                        |                                    |                                   | 50                                       | 392                                            | 0.75                     | 294.00                         |                                |                    | 190.23                              | 103.77                          | 204.48                            | 308.25                        |         |
| 118              | 1971 | Xu Peishi                         | 1               | poor peasant             | 21                    | 3                      | 2                     | 1                       | 6                              |                           |                           | 6                              | 60                                     | 702                       | 91                               | 793                    | 27                                   | 6                                    | 24                                      | 57                              |                                                       | 60                                       | 34                         | 2040                                          | 736                                             | 0.7                       | 515.2                                        |                     | 2555.2                                       |                                    |                                   | 300                                      | 736                                            | 0.75                     | 552.00                         | 7.12                           |                    | 465.81                              | 93.31                           | -961.38                           | -868.07                       |         |
| 119              | 1971 | Wang Qingchang                    | 1               | poor peasant             | 17                    | 2                      | 1                     | 1                       | 10                             | 2                         | 1                         | 7                              | 90                                     | 601                       | 85                               | 686                    | 20                                   | 5                                    | 40                                      | 65                              |                                                       | 90                                       | 34                         | 3060                                          | 621                                             | 0.7                       | 434.7                                        | 120                 | 3614.7                                       |                                    |                                   | 500                                      | 621                                            | 0.75                     | 465.75                         |                                |                    | 627.97                              | -162.22                         | -490.03                           | -652.25                       |         |
| 120              | 1971 | Wang Qinghai                      | 0               | poor peasant             | 17                    | 2                      | 1                     | 1                       | 4                              |                           | 1                         | 3                              | 38                                     | 582                       | 102                              | 684                    | 20                                   | 5                                    | 16                                      | 41                              |                                                       | 38                                       | 34                         | 1292                                          | 643                                             | 0.7                       | 450.1                                        |                     | 1742.1                                       |                                    |                                   | 200                                      | 643                                            | 0.75                     | 482.25                         |                                |                    | 588.68                              | -106.43                         | 278.85                            | 172.42                        |         |
| 121              | 1971 | Cao Desheng                       | 2               | poor peasant             | 10                    | 1                      | 1                     | 0                       | 1                              |                           |                           | 1                              | 10                                     | 252                       | 5                                | 257                    | 13                                   | 3                                    | 4                                       | 20                              |                                                       | 10                                       | 34                         | 340                                           | 237                                             | 0.7                       | 165.9                                        |                     | 505.9                                        |                                    |                                   | 50                                       | 237                                            | 0.75                     | 177.75                         |                                |                    | 123.65                              | 54.10                           | -164.50                           | -110.40                       |         |
| 122              | 1971 | Ma Yuying                         | 2               | poor peasant             |                       |                        |                       |                         | 2                              |                           |                           | 2                              | 20                                     |                           | 10                               | 10                     |                                      |                                      | 8                                       | 8                               |                                                       | 20                                       | 34                         | 680                                           | 2                                               | 0.7                       | 1.4                                          |                     | 681.4                                        |                                    |                                   | 100                                      | 2                                              | 0.75                     | 1.50                           | 50.00                          |                    |                                     | 107.76                          | -56.26                            | -176.54                       | -232.80 |
| 123              | 1971 | Liu Peizhen                       | 2               | poor peasant             |                       |                        |                       |                         | 1                              |                           |                           | 1                              | 10                                     |                           |                                  | 0                      |                                      |                                      | 0                                       |                                 |                                                       | 10                                       | 34                         | 340                                           | 0                                               | 0.7                       | 0                                            |                     | 340                                          |                                    |                                   | 50                                       |                                                | 0.75                     | 0.00                           |                                |                    | 72.50                               | -72.50                          | -343.39                           | -415.89                       |         |
| 124              | 1971 | Liu Dahai                         | 2               | middle-class peasant     | 24                    | 3                      | 1                     | 2                       | 4                              | 1                         |                           | 3                              | 36                                     | 609                       | 70                               | 679                    | 28                                   | 7                                    | 16                                      | 51                              |                                                       | 36                                       | 34                         | 1224                                          | 628                                             | 0.7                       | 439.6                                        |                     | 1663.6                                       |                                    |                                   | 200                                      | 628                                            | 0.75                     | 471.00                         |                                |                    | 415.85                              | 55.15                           | 260.88                            | 316.03                        |         |
| 125              | 1971 | Liu Ercan                         | 2               | middle-class peasant     |                       |                        |                       |                         | 2                              |                           |                           | 2                              | 20                                     |                           | 10                               | 10                     |                                      |                                      | 8                                       | 8                               |                                                       | 20                                       | 34                         | 680                                           | 2                                               | 0.7                       | 1.4                                          | 60                  | 741.4                                        |                                    |                                   | 100                                      | 2                                              | 0.75                     | 1.50                           |                                |                    | 135.21                              | -133.71                         | -506.42                           | -640.13                       |         |
| 126              | 1971 | Wu Jingxiang                      | 1               | low-middle-class peasant | 7                     | 1                      | 0                     | 1                       | 4                              | 1                         | 1                         | 2                              | 34                                     | 32                        | 42                               | 74                     | 9                                    | 2                                    | 16                                      | 27                              |                                                       | 34                                       | 34                         | 1156                                          | 47                                              | 0.7                       | 32.9                                         | 90                  | 1278.9                                       |                                    |                                   | 200                                      | 47                                             | 0.75                     | 35.25                          | 182.00                         |                    |                                     | 228.01                          | -10.76                            | -103.41                       | -114.17 |
| 127              | 1971 | Zhang Hengde                      | 2               | poor peasant             | 24                    | 3                      | 1                     | 2                       | 7                              |                           |                           | 7                              | 70                                     | 968                       | 151                              | 1119                   | 31                                   | 7                                    | 28                                      | 66                              |                                                       | 70                                       | 34                         | 2380                                          | 1053                                            | 0.7                       | 737.1                                        |                     | 3117.1                                       |                                    |                                   | 350                                      | 1053                                           | 0.75                     | 789.75                         | 1.78                           |                    | 656.58                              | 134.95                          | 576.67                            | 711.62                        |         |
| 128              | 1971 | Zhang Hengde                      | 2               | poor peasant             | 8                     | 1                      | 1                     | 0                       | 1                              |                           |                           | 1                              | 10                                     | 360                       | 5                                | 365                    | 10                                   | 2                                    | 4                                       | 16                              |                                                       | 10                                       | 34                         | 340                                           | 349                                             | 0.7                       | 244.3                                        |                     | 584.3                                        |                                    |                                   | 50                                       | 349                                            | 0.75                     | 261.75                         |                                |                    | 221.80                              | 39.95                           | 198.99                            | 238.94                        |         |
| 129              | 1971 | Wei Zhaoxiang                     | 2               | low-middle-class peasant | 10                    | 1                      | 1                     | 0                       | 3                              |                           |                           | 3                              | 30                                     | 657                       | 11                               | 668                    | 13                                   | 3                                    | 12                                      | 28                              |                                                       | 30                                       | 34                         | 1020                                          | 640                                             | 0.7                       | 448                                          |                     | 1468                                         |                                    |                                   | 150                                      | 640                                            | 0.75                     | 480.00                         |                                |                    | 381.41                              | 98.59                           | 177.83                            | 276.42                        |         |
| 130              | 1971 | Mu Zhaoren                        | 2               | poor peasant             | 17                    | 2                      | 1                     | 1                       | 7                              | 1                         | 1                         | 5                              | 64                                     | 527                       | 125                              | 652                    | 20                                   | 5                                    | 28                                      | 53                              |                                                       | 64                                       | 34                         | 2176                                          | 599                                             | 0.7                       | 419.3                                        | 100                 | 2695.3                                       |                                    |                                   | 350                                      | 598                                            | 0.75                     | 448.50                         |                                |                    | 528.46                              | -79.96                          | -317.57                           | -397.53                       |         |
| 131              | 1971 | Li Shiyiing                       | 2               | poor peasant             |                       |                        |                       |                         | 2                              |                           |                           | 2                              | 20                                     | 288                       | 10                               | 298                    |                                      |                                      | 8                                       | 8                               |                                                       | 20                                       | 34                         | 680                                           | 290                                             | 0.7                       | 203                                          |                     | 883                                          |                                    |                                   | 100                                      | 290                                            | 0.75                     | 217.50                         |                                |                    | 155.66                              | 61.84                           | -47.28                            | 14.56                         |         |
| 132              | 1971 | Wu Jinggui                        | 1               | low-middle-class peasant | 30                    | 4                      | 2                     | 2                       | 7                              |                           |                           | 7                              | 70                                     | 1113                      | 142                              | 1255                   | 39                                   | 9                                    | 28                                      | 76                              |                                                       | 70                                       | 34                         | 2380                                          | 1179                                            | 0.7                       | 825.3                                        | 150                 | 3355.3                                       |                                    |                                   | 350                                      | 1179                                           | 0.75                     | 884.25                         |                                |                    | 910.68                              | -26.43                          | 352.24                            | 325.81                        |         |

(cont.)

| Household number | Year | Name of the head of the household | Production team | Class status (1)           | Basic work points (2) | Total labor forces (3) | Male labor forces (4) | Female labor forces (5) | Total household population (6) | Age: 1 to 3 years old (7) | Age: 4 to 7 years old (8) | Age: 8 years old and above (9) | Work points of grain distribution (10) | Laboring work points (11) | Farmyard manure work points (12) | Total work points (13) | Work points of compulsory labor (14) | Work points of help cultivation (15) | Work points of private plots labor (16) | Total deducted work points (17) | Acutal workdays of participation in distribution (18) | Workpoints for rations distribution (19) | Rations per workpoint (20) | Total rations received form distribution (21) | Workdays of participation in distribu-tion (22) | Grains per workpoint (23) | Total grains distributed by work-points (24) | Grains subsidy (25) | Total Grains received from distribution (26) | Distributed grains per person (27) | Distributed grains per adult (28) | Grains received from privated plots (29) | Workdays of participation in distribution (30) | Value per workpoint (31) | Total value of workpoints (32) | Money used for investment (33) | Sum of income (34) | Money distributed in this year (34) | Deposit/ debt of this year (35) | Deposit/ debt over the years (36) | Accumulated deposit/debt (37) |
|------------------|------|-----------------------------------|-----------------|----------------------------|-----------------------|------------------------|-----------------------|-------------------------|--------------------------------|---------------------------|---------------------------|--------------------------------|----------------------------------------|---------------------------|----------------------------------|------------------------|--------------------------------------|--------------------------------------|-----------------------------------------|---------------------------------|-------------------------------------------------------|------------------------------------------|----------------------------|-----------------------------------------------|-------------------------------------------------|---------------------------|----------------------------------------------|---------------------|----------------------------------------------|------------------------------------|-----------------------------------|------------------------------------------|------------------------------------------------|--------------------------|--------------------------------|--------------------------------|--------------------|-------------------------------------|---------------------------------|-----------------------------------|-------------------------------|
| 133              | 1971 | Wu Jingfang                       | 2               | middle-class peasant       | 17                    | 2                      | 1                     | 1                       | 7                              | 1                         | 1                         | 5                              | 64                                     | 363                       | 125                              | 488                    | 22                                   | 5                                    | 28                                      | 55                              |                                                       | 64                                       | 34                         | 2176                                          | 433                                             | 0.7                       | 303.1                                        |                     | 2479.1                                       | 354                                |                                   | 350                                      | 433                                            | 0.75                     | 324.75                         |                                |                    | 463.99                              | -139.24                         | -379.41                           | -518.65                       |
| 134              | 1971 | Wu Jingyu                         | 2               | low-middle-class peasant   | 32                    | 4                      | 2                     | 2                       | 7                              | 1                         |                           | 6                              | 66                                     | 1029                      | 113                              | 1142                   | 42                                   | 10                                   | 28                                      | 80                              |                                                       | 66                                       | 34                         | 2244                                          | 1062                                            | 0.7                       | 743.4                                        |                     | 2987.4                                       | 427                                |                                   | 350                                      | 1062                                           | 0.75                     | 796.50                         |                                |                    | 691.77                              | 104.73                          | 297.74                            | 402.47                        |
| 135              | 1971 | Wu Jinghua                        | 2               | low-middle-class peasant   | 35                    | 4                      | 3                     | 1                       | 6                              |                           | 1                         | 5                              | 58                                     | 1108                      | 95                               | 1203                   | 46                                   | 11                                   | 24                                      | 81                              |                                                       | 58                                       | 34                         | 1972                                          | 1122                                            | 0.7                       | 785.4                                        | 100                 | 2857.4                                       | 476                                |                                   | 300                                      | 1122                                           | 0.75                     | 841.50                         |                                |                    | 692.65                              | 148.85                          | 216.25                            | 365.10                        |
| 136              | 1971 | Wu Changbiao                      | 2               | middle-class peasant       |                       |                        |                       |                         | 1                              |                           |                           | 1                              | 10                                     | 296                       | 5                                | 301                    |                                      |                                      | 4                                       | 4                               |                                                       | 10                                       | 34                         | 340                                           | 297                                             | 0.7                       | 207.9                                        |                     | 547.9                                        | 548                                |                                   | 50                                       | 297                                            | 0.75                     | 222.75                         |                                |                    | 194.61                              | 28.14                           | 141.61                            | 169.75                        |
| 137              | 1971 | Wu Jingnan                        | 2               | middle-class peasant       | 17                    | 2                      | 1                     | 1                       | 6                              | 1                         | 1                         | 4                              | 54                                     | 398                       | 162                              | 560                    | 7                                    | 2                                    | 24                                      | 33                              |                                                       | 54                                       | 34                         | 1836                                          | 527                                             | 0.7                       | 368.9                                        |                     | 2204.9                                       | 367                                |                                   | 300                                      | 527                                            | 0.75                     | 395.25                         |                                |                    | 508.23                              | -112.98                         | 2.46                              | -110.52                       |
| 138              | 1971 | Wu Jing'an                        | 2               | middle-class peasant       | 17                    | 2                      | 1                     | 1                       | 3                              |                           |                           | 3                              | 30                                     | 476                       | 133                              | 609                    | 22                                   | 5                                    | 12                                      | 39                              |                                                       | 30                                       | 34                         | 1020                                          | 570                                             | 0.7                       | 399                                          |                     | 1419                                         | 473                                |                                   | 150                                      | 566                                            | 0.75                     | 424.50                         |                                |                    | 575.57                              | -151.07                         | 288.13                            | 137.06                        |
| 139              | 1971 | Wu Jinghui                        | 2               | middle-class peasant       | 17                    | 2                      | 1                     | 1                       | 5                              | 1                         | 1                         | 3                              | 44                                     | 542                       | 124                              | 666                    | 22                                   | 5                                    | 20                                      | 47                              |                                                       | 44                                       | 34                         | 1496                                          | 619                                             | 0.7                       | 433.3                                        |                     | 1929.3                                       | 386                                |                                   | 250                                      | 619                                            | 0.75                     | 464.25                         |                                |                    | 441.62                              | 22.63                           | 136.32                            | 158.95                        |
| 140              | 1971 | Wu Jingying                       | 2               | middle-class peasant       | 17                    | 2                      | 1                     | 1                       | 8                              | 1                         | 1                         | 6                              | 74                                     | 524                       | 138                              | 662                    | 22                                   | 5                                    | 32                                      | 59                              |                                                       | 74                                       | 34                         | 2516                                          | 603                                             | 0.7                       | 422.1                                        |                     | 2938.1                                       | 367                                |                                   | 400                                      | 593                                            | 0.75                     | 444.75                         | 45.00                          |                    | 525.74                              | -35.99                          | -275.41                           | -311.40                       |
| 141              | 1971 | Wu Jingfu                         | 2               | middle-class peasant       | 17                    | 2                      | 1                     | 1                       | 5                              | 2                         | 1                         | 2                              | 40                                     | 361                       | 91                               | 452                    | 20                                   | 5                                    | 20                                      | 45                              |                                                       | 40                                       | 34                         | 1360                                          | 407                                             | 0.7                       | 284.9                                        |                     | 1644.9                                       | 329                                |                                   | 250                                      | 407                                            | 0.75                     | 305.25                         |                                |                    | 324.85                              | -19.60                          | 52.02                             | 32.42                         |
| 142              | 1971 | Meng Dongmei                      | 2               | low-middle-class peasant   | 7                     | 1                      | 0                     | 1                       | 4                              | 1                         | 1                         | 2                              | 34                                     | 25                        | 35                               | 60                     | 9                                    | 2                                    | 16                                      | 27                              |                                                       | 34                                       | 34                         | 1156                                          | 33                                              | 0.7                       | 23.1                                         |                     | 1179.1                                       | 295                                |                                   | 200                                      | 33                                             | 0.75                     | 24.75                          | 210.00                         |                    | 205.60                              | 29.15                           | -103.22                           | -74.07                        |
| 143              | 1971 | Mneg Tianyu                       | 2               | poor peasant               | 40                    | 5                      | 3                     | 2                       | 8                              | 1                         |                           | 7                              | 76                                     | 1089                      | 114                              | 1203                   | 52                                   | 12                                   | 32                                      | 96                              |                                                       | 76                                       | 34                         | 2584                                          | 1107                                            | 0.7                       | 774.9                                        |                     | 3358.9                                       | 420                                |                                   | 400                                      | 1107                                           | 0.75                     | 830.25                         |                                |                    | 690.79                              | 139.46                          | 210.79                            | 350.25                        |
| 144              | 1971 | Xue Lanying                       | 2               | middle-class peasant       |                       |                        |                       |                         | 1                              |                           |                           | 1                              | 10                                     |                           |                                  | 0                      |                                      |                                      | 4                                       | 4                               |                                                       | 10                                       | 34                         | 340                                           | 0                                               | 0.7                       | 0                                            |                     | 340                                          | 340                                |                                   | 50                                       |                                                | 0.75                     | 0.00                           | 200.00                         |                    | 73.54                               | 126.46                          | -497.94                           | -371.48                       |
| 145              | 1971 | Wang Shufu                        | 2               | poor peasant               | 17                    | 2                      | 1                     | 1                       | 2                              |                           |                           | 2                              | 20                                     | 465                       | 10                               | 475                    | 22                                   | 5                                    | 8                                       | 35                              |                                                       | 20                                       | 34                         | 680                                           | 440                                             | 0.7                       | 308                                          |                     | 988                                          | 494                                |                                   | 100                                      | 440                                            | 0.75                     | 330.00                         |                                |                    | 333.16                              | -3.16                           | 174.94                            | 171.78                        |
| 146              | 1971 | Li Changsheng                     | 2               | poor peasant               | 15                    | 2                      | 1                     | 1                       | 7                              | 1                         | 2                         | 4                              | 62                                     | 709                       | 78                               | 787                    | 7                                    | 2                                    | 28                                      | 37                              |                                                       | 62                                       | 34                         | 2108                                          | 750                                             | 0.7                       | 525                                          | 170                 | 2803                                         | 400                                |                                   | 350                                      | 750                                            | 0.75                     | 562.50                         |                                |                    | 594.22                              | -31.72                          | 202.75                            | 171.03                        |
| 147              | 1971 | Zhang Yongqing                    | 2               | poor peasant               | 15                    | 2                      | 1                     | 1                       | 2                              |                           |                           | 2                              | 20                                     | 509                       | 10                               | 519                    | 20                                   | 7                                    | 8                                       | 35                              |                                                       | 20                                       | 34                         | 680                                           | 484                                             | 0.7                       | 338.8                                        |                     | 1018.8                                       | 509                                |                                   | 100                                      | 484                                            | 0.75                     | 363.00                         |                                |                    | 330.77                              | 32.23                           | 386.43                            | 418.66                        |
| 148              | 1971 | Wang Suzhen                       | 2               | poor peasant               |                       |                        |                       |                         | 1                              |                           |                           | 1                              | 10                                     | 30                        | 5                                | 35                     |                                      |                                      | 4                                       | 4                               |                                                       | 10                                       | 34                         | 340                                           | 31                                              | 0.7                       | 21.7                                         |                     | 361.7                                        | 362                                |                                   | 50                                       | 31                                             | 0.75                     | 23.25                          |                                |                    | 78.18                               | -54.93                          | -457.49                           | -512.42                       |
| 149              | 1971 | Liu Chunxiang                     | 2               | upper-middle-class peasant | 30                    | 4                      | 2                     | 2                       | 4                              |                           |                           | 4                              | 40                                     | 1000                      | 63                               | 1063                   | 39                                   | 9                                    | 12                                      | 60                              |                                                       | 40                                       | 34                         | 1360                                          | 1003                                            | 0.7                       | 702.1                                        |                     | 2062.1                                       | 516                                |                                   | 200                                      | 1003                                           | 0.75                     | 752.25                         |                                |                    | 529.09                              | 223.16                          | 261.92                            | 485.08                        |
| 150              | 1971 | Liu Chunyou                       | 2               | low-middle-class peasant   | 25                    | 3                      | 2                     | 1                       | 4                              | 1                         |                           | 3                              | 36                                     | 822                       | 119                              | 941                    | 30                                   | 8                                    | 16                                      | 54                              |                                                       | 36                                       | 34                         | 1224                                          | 887                                             | 0.7                       | 620.9                                        |                     | 1844.9                                       | 461                                |                                   | 200                                      | 887                                            | 0.75                     | 665.25                         |                                |                    | 591.75                              | 73.50                           | 540.99                            | 614.49                        |

(cont.)

| Household number | Year | Name of the head of the household | Production team | Class status (1)           | Basic work points (2) | Total labor forces (3) | Male labor forces (4) | Female labor forces (5) | Total household population (6) | Age: 1 to 3 years old (7) | Age: 4 to 7 years old (8) | Age: 8 years old and above (9) | Work points of grain distribution (10) | Laboring work points (11) | Farmyard manure work points (12) | Total work points (13) | Work points of compulsory labor (14) | Work points of help cultivation (15) | Work points of private plots labor (16) | Total deducted work points (17) | Acutal workdays of participation in distribution (18) | Workpoints for rations distribution (19) | Rations per workpoint (20) | Total rations received form distribution (21) | Workdays of participation in distribu-tion (22) | Grains per workpoint (23) | Total grains distributed by work-points (24) | Grains subsidy (25) | Total Grains received from distribution (26) | Distributed grains per person (27) | Distributed grains per adult (28) | Grains received from privated plots (29) | Workdays of participation in distribution (30) | Value per workpoint (31) | Total value of workpoints (32) | Money used for investment (33) | Sum of income (34) | Money distributed in this year (34) | Deposit/ debt of this year (35) | Deposit/ debt over the years (36) | Accumulated deposit/debt (37) |         |
|------------------|------|-----------------------------------|-----------------|----------------------------|-----------------------|------------------------|-----------------------|-------------------------|--------------------------------|---------------------------|---------------------------|--------------------------------|----------------------------------------|---------------------------|----------------------------------|------------------------|--------------------------------------|--------------------------------------|-----------------------------------------|---------------------------------|-------------------------------------------------------|------------------------------------------|----------------------------|-----------------------------------------------|-------------------------------------------------|---------------------------|----------------------------------------------|---------------------|----------------------------------------------|------------------------------------|-----------------------------------|------------------------------------------|------------------------------------------------|--------------------------|--------------------------------|--------------------------------|--------------------|-------------------------------------|---------------------------------|-----------------------------------|-------------------------------|---------|
| 151              | 1971 | Wang Kaitai                       | 2               | middle-class peasant       | 10                    | 1                      | 1                     | 0                       | 2                              |                           |                           | 2                              | 20                                     | 362                       | 56                               | 418                    | 13                                   | 3                                    | 8                                       | 24                              |                                                       | 20                                       | 34                         | 680                                           | 394                                             | 0.7                       | 275.8                                        |                     | 955.8                                        |                                    | 478                               |                                          | 100                                            | 394                      | 0.75                           | 295.50                         |                    |                                     | 252.23                          | 43.27                             | 117.52                        | 160.79  |
| 152              | 1971 | Meng Minghuan                     | 2               | middle-class peasant       |                       |                        |                       |                         | 2                              |                           |                           | 2                              | 20                                     | 9                         | 161                              | 170                    |                                      |                                      | 8                                       | 8                               |                                                       | 20                                       | 34                         | 680                                           | 162                                             | 0.7                       | 113.4                                        |                     | 793.4                                        |                                    | 397                               |                                          | 100                                            | 162                      | 0.75                           | 121.50                         |                    |                                     | 163.95                          | -42.45                            | -61.94                        | -104.39 |
| 153              | 1971 | Meng Qingfu                       | 2               | middle-class peasant       | 10                    | 1                      | 1                     | 0                       | 1                              |                           |                           | 1                              | 10                                     | 467                       | 5                                | 472                    | 13                                   | 3                                    | 4                                       | 20                              |                                                       | 10                                       | 34                         | 340                                           | 452                                             | 0.7                       | 316.4                                        |                     | 656.4                                        |                                    | 656                               |                                          | 50                                             | 452                      | 0.75                           | 339.00                         |                    |                                     | 285.81                          | 53.19                             | 211.16                        | 264.35  |
| 154              | 1971 | Mneg Qingsheng                    | 2               | middle-class peasant       | 10                    | 1                      | 1                     | 0                       | 1                              |                           |                           | 1                              | 10                                     | 368                       | 5                                | 373                    | 13                                   | 3                                    | 4                                       | 20                              |                                                       | 10                                       | 34                         | 340                                           | 353                                             | 0.7                       | 247.1                                        |                     | 587.1                                        |                                    | 587                               |                                          | 50                                             | 352                      | 0.75                           | 264.00                         |                    |                                     | 273.58                          | -9.58                             | 147.88                        | 138.30  |
| 155              | 1971 | Meng Qingbao                      | 2               | middle-class peasant       | 10                    | 1                      | 1                     | 0                       | 2                              |                           |                           | 2                              | 20                                     | 296                       | 25                               | 321                    | 13                                   | 3                                    | 8                                       | 24                              |                                                       | 20                                       | 34                         | 680                                           | 297                                             | 0.7                       | 207.9                                        |                     | 887.9                                        |                                    | 444                               |                                          | 100                                            | 297                      | 0.75                           | 222.75                         | 1.78               |                                     | 214.83                          | 9.70                              | -254.63                       | -244.93 |
| 156              | 1971 | Cao Jincheng                      | 2               | poor peasant               | 10                    | 1                      | 1                     | 0                       | 1                              |                           |                           | 1                              | 10                                     | 385                       | 5                                | 390                    | 13                                   | 3                                    | 4                                       | 20                              |                                                       | 10                                       | 34                         | 340                                           | 370                                             | 0.7                       | 259                                          |                     | 599                                          |                                    | 599                               |                                          | 50                                             | 370                      | 0.75                           | 277.50                         |                    |                                     | 206.18                          | 71.32                             | 79.29                         | 150.61  |
| 157              | 1971 | Cao Jinwei                        | 2               | poor peasant               | 13                    | 2                      | 1                     | 1                       | 2                              |                           |                           | 2                              | 20                                     | 441                       | 10                               | 451                    | 17                                   | 4                                    | 8                                       | 29                              |                                                       | 20                                       | 34                         | 680                                           | 422                                             | 0.7                       | 295.4                                        |                     | 975.4                                        |                                    | 488                               |                                          | 100                                            | 422                      | 0.75                           | 316.50                         |                    |                                     | 292.13                          | 24.37                             | 272.73                        | 297.10  |
| 158              | 1971 | Meng Tianlai                      | 2               | middle-class peasant       | 17                    | 2                      | 1                     | 1                       | 3                              |                           |                           | 3                              | 30                                     | 370                       | 100                              | 470                    | 20                                   | 5                                    | 12                                      | 37                              |                                                       | 30                                       | 34                         | 1020                                          | 433                                             | 0.7                       | 303.1                                        |                     | 1323.1                                       |                                    | 441                               |                                          | 150                                            | 433                      | 0.75                           | 324.75                         |                    |                                     | 350.85                          | -26.10                            | 173.18                        | 147.08  |
| 159              | 1971 | Yu Guiying                        | 1               | poor peasant               |                       |                        |                       |                         | 1                              |                           |                           | 1                              | 10                                     | 39                        | 5                                | 44                     |                                      |                                      | 4                                       | 4                               |                                                       | 10                                       | 34                         | 340                                           | 40                                              | 0.7                       | 28                                           |                     | 368                                          |                                    | 368                               |                                          | 50                                             | 40                       | 0.75                           | 30.00                          |                    |                                     | 70.84                           | -40.84                            | -357.69                       | -398.53 |
| 160              | 1971 | Liu Chunxiao                      | 2               | upper-middle-class peasant | 10                    | 1                      | 1                     | 0                       | 2                              |                           |                           | 2                              | 20                                     | 372                       | 20                               | 392                    | 13                                   | 3                                    | 8                                       | 24                              |                                                       | 20                                       | 34                         | 680                                           | 368                                             | 0.7                       | 257.6                                        |                     | 937.6                                        |                                    | 469                               |                                          | 100                                            | 368                      | 0.75                           | 276.00                         |                    |                                     | 237.29                          | 38.71                             | 109.81                        | 148.52  |
| 161              | 1971 | Meng Qinghua                      | 2               | low-middle-class peasant   | 8                     | 1                      | 1                     | 0                       | 1                              |                           |                           | 1                              | 10                                     | 226                       |                                  | 226                    | 10                                   | 2                                    | 4                                       | 16                              |                                                       | 10                                       | 34                         | 340                                           | 210                                             | 0.7                       | 147                                          |                     | 487                                          |                                    | 487                               |                                          | 50                                             | 210                      | 0.75                           | 157.50                         |                    |                                     | 153.37                          | 4.13                              | 159.03                        | 163.16  |
| 162              | 1971 | Meng Peigui                       | 2               | rich peasant               | 13                    | 2                      | 1                     | 1                       | 2                              |                           |                           | 2                              | 20                                     | 407                       | 10                               | 417                    | 30                                   | 7                                    | 8                                       | 45                              |                                                       | 20                                       | 34                         | 680                                           | 372                                             | 0.7                       | 260.4                                        |                     | 940.4                                        |                                    | 470                               |                                          | 100                                            | 372                      | 0.75                           | 279.00                         |                    |                                     | 366.25                          | -87.25                            | 209.69                        | 122.44  |
| 163              | 1971 | Meng Peiji                        | 2               | rich peasant               | 17                    | 2                      | 1                     | 1                       | 7                              |                           |                           | 7                              | 70                                     | 623                       | 176                              | 799                    | 35                                   | 8                                    | 28                                      | 71                              |                                                       | 70                                       | 34                         | 2380                                          | 728                                             | 0.7                       | 509.6                                        |                     | 2889.6                                       |                                    | 413                               |                                          | 350                                            | 728                      | 0.75                           | 546.00                         | 100.00             |                                     | 524.61                          | 121.39                            | -313.70                       | -192.31 |
| 164              | 1971 | Meng Jinghuan                     | 2               | upper-middle-class peasant | 7                     | 1                      | 0                     | 1                       | 3                              |                           |                           | 3                              | 30                                     | 149                       | 15                               | 164                    | 9                                    | 2                                    | 12                                      | 23                              |                                                       | 30                                       | 34                         | 1020                                          | 141                                             | 0.7                       | 98.7                                         |                     | 1118.7                                       |                                    | 373                               |                                          | 150                                            | 141                      | 0.75                           | 105.75                         | 35.00              |                                     | 171.44                          | -30.69                            | 30.89                         | 0.20    |
| 165              | 1971 | Lan Jinzhi                        | 0               | poor peasant               | 20                    | 3                      | 1                     | 2                       | 7                              |                           | 1                         | 6                              | 68                                     | 666                       | 154                              | 820                    | 26                                   | 6                                    | 28                                      | 60                              |                                                       | 68                                       | 34                         | 2312                                          | 760                                             | 0.7                       | 532                                          |                     | 2844                                         |                                    | 406                               |                                          | 350                                            | 760                      | 0.75                           | 570.00                         |                    |                                     | 563.11                          | 6.89                              | 90.09                         | 96.98   |
| 166              | 1971 | Wang Jinshu                       | 2               | upper-middle-class peasant |                       |                        |                       |                         | 1                              |                           |                           | 1                              | 10                                     |                           |                                  | 0                      |                                      |                                      | 4                                       | 4                               |                                                       | 10                                       | 34                         | 340                                           | 0                                               | 0.7                       | 0                                            |                     | 340                                          |                                    | 340                               |                                          | 50                                             |                          | 0.75                           | 0.00                           |                    |                                     | 53.69                           | -53.69                            | -20.19                        | -73.88  |
| 167              | 1971 | Cao Xiangyun                      | 2               | upper-middle-class peasant | 7                     | 1                      | 0                     | 1                       | 6                              | 1                         |                           | 5                              | 56                                     | 39                        | 183                              | 222                    | 9                                    | 2                                    | 24                                      | 35                              |                                                       | 56                                       | 34                         | 1904                                          | 187                                             | 0.7                       | 130.9                                        |                     | 2034.9                                       |                                    | 339                               |                                          | 300                                            | 183                      | 0.75                           | 137.25                         | 236.00             |                                     | 333.75                          | 39.50                             | -74.33                        | -34.83  |
| 168              | 1971 | Li Shibao                         | 2               | poor peasant               | 17                    | 2                      | 1                     | 1                       | 8                              |                           | 2                         | 6                              | 76                                     | 622                       | 89                               | 711                    | 22                                   | 5                                    | 32                                      | 59                              |                                                       | 76                                       | 34                         | 2584                                          | 652                                             | 0.7                       | 456.4                                        | 170                 | 3210.4                                       |                                    | 401                               |                                          | 400                                            | 652                      | 0.75                           | 489.00                         |                    |                                     | 584.09                          | -95.09                            | -901.89                       | -996.98 |
| 169              | 1971 | Wang Kailu                        | 2               | poor peasant               | 21                    | 3                      | 2                     | 1                       | 6                              | 1                         |                           | 5                              | 56                                     | 965                       | 49                               | 1014                   | 27                                   | 3                                    | 24                                      | 54                              |                                                       | 56                                       | 34                         | 1904                                          | 960                                             | 0.7                       | 672                                          | 85                  | 2661                                         |                                    | 444                               |                                          | 300                                            | 960                      | 0.75                           | 720.00                         |                    |                                     | 599.82                          | 120.18                            | 252.13                        | 372.31  |
| 170              | 1971 | Zhao Hongrui                      | 1               | middle-class peasant       | 35                    | 4                      | 3                     | 1                       | 8                              | 1                         |                           | 7                              | 76                                     | 1190                      | 138                              | 1328                   | 46                                   | 11                                   | 32                                      | 89                              |                                                       | 76                                       | 34                         | 2584                                          | 1239                                            | 0.7                       | 867.3                                        |                     | 3451.3                                       |                                    | 431                               |                                          | 400                                            | 1239                     | 0.75                           | 929.25                         | 1.78               |                                     | 767.86                          | 163.17                            | 51.76                         | 214.93  |

(cont.)

| Household number | Year | Name of the head of the household | Production team | Class status (1)         | Basic work points (2) | Total labor forces (3) | Male labor forces (4) | Female labor forces (5) | Total household population (6) | Age: 1 to 3 years old (7) | Age: 4 to 7 years old (8) | Age: 8 years old and above (9) | Work points of grain distribution (10) | Laboring work points (11) | Farmyard manure work points (12) | Total work points (13) | Work points of compulsory labor (14) | Work points of help cultivation (15) | Work points of private plots labor (16) | Total deducted work points (17) | Actual workdays of participation in distribution (18) | Workpoints for rations distribution (19) | Rations per workpoint (20) | Total rations received from distribution (21) | Workdays of participation in distribution (22) | Grains per workpoint (23) | Total grains distributed by work-points (24) | Grains subsidy (25) | Total Grains received from distribution (26) | Distributed grains per person (27) | Distributed grains per adult (28) | Grains received from private plots (29) | Workdays of participation in distribution (30) | Value per workpoint (31) | Total value of workpoints (32) | Money used for investment (33) | Sum of income (34) | Money distributed in this year (34) | Deposit/debt of this year (35) | Deposit/debt over the years (36) | Accumulated deposit/debt (37) |          |
|------------------|------|-----------------------------------|-----------------|--------------------------|-----------------------|------------------------|-----------------------|-------------------------|--------------------------------|---------------------------|---------------------------|--------------------------------|----------------------------------------|---------------------------|----------------------------------|------------------------|--------------------------------------|--------------------------------------|-----------------------------------------|---------------------------------|-------------------------------------------------------|------------------------------------------|----------------------------|-----------------------------------------------|------------------------------------------------|---------------------------|----------------------------------------------|---------------------|----------------------------------------------|------------------------------------|-----------------------------------|-----------------------------------------|------------------------------------------------|--------------------------|--------------------------------|--------------------------------|--------------------|-------------------------------------|--------------------------------|----------------------------------|-------------------------------|----------|
| 171              | 1971 | Fang Chunxing                     | 0               | middle-class peasant     |                       |                        |                       |                         | 1                              |                           |                           | 1                              | 10                                     |                           |                                  | 0                      |                                      |                                      | 4                                       | 4                               |                                                       | 10                                       | 34                         | 340                                           | 0                                              | 0.7                       | 0                                            |                     | 340                                          |                                    | 340                               |                                         | 50                                             |                          | 0.75                           | 0.00                           | 80.00              |                                     | 50.42                          | 29.58                            | -135.62                       | -106.04  |
| 172              | 1971 | Zhao Honglin                      | 2               | middle-class peasant     | 7                     | 1                      | 0                     | 1                       | 5                              | 1                         | 1                         | 3                              | 44                                     | 26                        | 58                               | 84                     | 22                                   | 5                                    | 20                                      | 47                              |                                                       | 44                                       | 34                         | 1496                                          | 37                                             | 0.7                       | 25.9                                         | 78                  | 1599.9                                       | 320                                |                                   | 250                                     |                                                | 33                       | 0.75                           | 24.75                          | 180.00             |                                     | 260.07                         | -55.32                           | -71.91                        | -127.23  |
| 173              | 1971 | Yu Jinquan                        | 0               | poor peasant             | 7                     | 4                      | 3                     | 1                       | 6                              |                           |                           | 6                              | 60                                     | 1314                      | 117                              | 1431                   | 61                                   | 14                                   | 24                                      | 99                              |                                                       | 60                                       | 34                         | 2040                                          | 1332                                           | 0.7                       | 932.4                                        |                     | 2972.4                                       | 495                                |                                   | 300                                     |                                                | 1332                     | 0.75                           | 999.00                         | 1.78               |                                     | 772.86                         | 227.92                           | 474.74                        | 702.66   |
| 174              | 1971 | Yu Jinliang                       | 0               | poor peasant             |                       |                        |                       |                         | 1                              |                           |                           | 1                              | 10                                     | 281                       |                                  | 281                    |                                      |                                      | 4                                       | 4                               |                                                       | 10                                       | 34                         | 340                                           | 277                                            | 0.7                       | 193.9                                        |                     | 533.9                                        |                                    | 534                               |                                         | 50                                             |                          | 277                            | 0.75                           | 207.75             |                                     | 168.99                         | 38.76                            | 138.82                        | 177.58   |
| 175              | 1971 | Mu Zhaoxin                        | 2               | poor peasant             | 7                     | 1                      | 0                     | 1                       | 1                              |                           |                           | 1                              | 10                                     | 195                       | 36                               | 231                    | 9                                    | 2                                    | 4                                       | 15                              |                                                       | 10                                       | 34                         | 340                                           | 216                                            | 0.7                       | 151.2                                        |                     | 491.2                                        | 491                                |                                   | 50                                      |                                                | 216                      | 0.75                           | 162.00                         |                    | 112.90                              | 49.10                          | 22.90                            | 72.00                         |          |
| 176              | 1971 | Wang Guijing                      | 0               | poor peasant             | 10                    | 2                      | 0                     | 2                       | 2                              |                           |                           | 2                              | 20                                     | 249                       | 18                               | 267                    | 13                                   | 3                                    | 8                                       | 24                              |                                                       | 20                                       | 34                         | 680                                           | 243                                            | 0.7                       | 170.1                                        |                     | 850.1                                        | 425                                |                                   | 100                                     |                                                | 243                      | 0.75                           | 182.25                         |                    | 200.31                              | -18.06                         | 45.79                            | 27.73                         |          |
| 177              | 1971 | Zhang Xuezhong                    | 1               | low-middle-class peasant | 27                    | 4                      | 1                     | 3                       | 10                             | 2                         | 1                         | 7                              | 90                                     | 741                       | 73                               | 814                    | 35                                   | 8                                    | 40                                      | 83                              |                                                       | 90                                       | 34                         | 3060                                          | 731                                            | 0.7                       | 511.7                                        |                     | 3571.7                                       | 357                                |                                   | 500                                     |                                                | 731                      | 0.75                           | 548.25                         | 1.78               |                                     | 666.18                         | -116.15                          | -1167.52                      | -1283.67 |
| 178              | 1971 | Jia Anji                          | 2               | poor peasant             | 10                    | 1                      | 1                     | 0                       | 4                              |                           |                           | 4                              | 40                                     | 517                       | 20                               | 537                    | 13                                   | 3                                    | 16                                      | 32                              |                                                       | 40                                       | 34                         | 1360                                          | 505                                            | 0.7                       | 353.5                                        |                     | 1713.5                                       | 428                                |                                   | 200                                     |                                                | 505                      | 0.75                           | 378.75                         | 5.70               |                                     | 483.91                         | -99.46                           | 89.26                         | -10.20   |
| 179              | 1971 | Liu Peishou                       | 1               | middle-class peasant     | 16                    | 2                      | 2                     | 0                       | 4                              |                           |                           | 4                              | 40                                     | 601                       | 100                              | 701                    | 34                                   | 8                                    | 16                                      | 58                              |                                                       | 40                                       | 34                         | 1360                                          | 643                                            | 0.7                       | 450.1                                        |                     | 1810.1                                       | 453                                |                                   | 200                                     |                                                | 643                      | 0.75                           | 482.25                         |                    | 458.33                              | 23.92                          | 227.25                           | 251.17                        |          |
| 180              | 1971 | Gao Yunxian                       | 2               | middle-class peasant     | 27                    | 3                      | 2                     | 1                       | 8                              |                           |                           | 8                              | 80                                     | 1073                      | 82                               | 1155                   | 35                                   | 8                                    | 32                                      | 75                              |                                                       | 80                                       | 34                         | 2720                                          | 1080                                           | 0.7                       | 756                                          | 100                 | 3576                                         | 447                                |                                   | 400                                     |                                                | 1080                     | 0.75                           | 810.00                         |                    |                                     | 733.94                         | 76.06                            | 124.58                        | 200.64   |
| 181              | 1971 | Tian Kehua                        | 2               | middle-class peasant     |                       |                        |                       |                         | 1                              |                           |                           | 1                              | 10                                     | 103                       | 5                                | 108                    |                                      |                                      | 4                                       | 4                               |                                                       | 10                                       | 34                         | 340                                           | 104                                            | 0.7                       | 72.8                                         |                     | 412.8                                        | 413                                |                                   | 50                                      |                                                | 104                      | 0.75                           | 78.00                          |                    | 84.21                               | -6.21                          | -47.45                           | -53.66                        |          |
| 182              | 1971 | Tian Dawei                        | 1               | middle-class peasant     | 17                    | 2                      | 1                     | 1                       | 5                              | 1                         | 1                         | 3                              | 44                                     | 431                       | 74                               | 505                    | 20                                   | 5                                    | 20                                      | 45                              |                                                       | 44                                       | 34                         | 1496                                          | 460                                            | 0.7                       | 322                                          |                     | 1818                                         | 364                                |                                   | 250                                     |                                                | 460                      | 0.75                           | 345.00                         |                    | 367.38                              | -22.38                         | -176.33                          | -198.71                       |          |
| 183              | 1971 | Fan Liyuan                        | 2               | middle-class peasant     | 13                    | 2                      | 1                     | 1                       | 4                              |                           |                           | 4                              | 40                                     | 689                       | 148                              | 837                    | 17                                   | 4                                    | 16                                      | 37                              |                                                       | 40                                       | 34                         | 1360                                          | 800                                            | 0.7                       | 560                                          |                     | 1920                                         | 480                                |                                   | 200                                     |                                                | 800                      | 0.75                           | 600.00                         |                    |                                     | 362.82                         | 237.18                           | 181.24                        | 418.42   |
| 184              | 1971 | Fan Shutang                       | 1               | middle-class peasant     | 17                    | 2                      | 1                     | 1                       | 6                              | 1                         | 1                         | 4                              | 54                                     | 452                       | 62                               | 514                    | 22                                   | 5                                    | 24                                      | 51                              |                                                       | 54                                       | 34                         | 1836                                          | 463                                            | 0.7                       | 324.1                                        | 100                 | 2260.1                                       | 377                                |                                   | 300                                     |                                                | 463                      | 0.75                           | 347.25                         |                    |                                     | 456.94                         | -109.69                          | -61.22                        | -170.91  |
| 185              | 1971 | Fan Chunxiang                     | 1               | middle-class peasant     | 7                     | 1                      | 0                     | 1                       | 3                              |                           | 1                         | 2                              | 28                                     | 149                       | 45                               | 194                    | 9                                    | 2                                    | 12                                      | 23                              |                                                       | 28                                       | 34                         | 952                                           | 171                                            | 0.7                       | 119.7                                        |                     | 1071.7                                       | 357                                |                                   | 150                                     |                                                | 171                      | 0.75                           | 128.25                         | 50.00              |                                     | 175.69                         | 2.56                             | 1.48                          | 4.04     |
| 186              | 1971 | Lian Huaizhe                      | 1               | poor peasant             | 11                    | 2                      | 1                     | 1                       | 3                              |                           |                           | 3                              | 30                                     | 383                       | 59                               | 442                    | 14                                   | 3                                    | 12                                      | 29                              |                                                       | 30                                       | 34                         | 1020                                          | 413                                            | 0.7                       | 289.1                                        |                     | 1309.1                                       | 436                                |                                   | 150                                     |                                                | 413                      | 0.75                           | 309.75                         |                    | 307.71                              | 2.04                           | 21.49                            | 23.53                         |          |
| 187              | 1971 | Lian Wenbing                      | 2               | poor peasant             | 17                    | 2                      | 1                     | 1                       | 4                              |                           | 1                         | 2                              | 34                                     | 464                       | 20                               | 484                    | 20                                   | 5                                    | 16                                      | 41                              |                                                       | 34                                       | 34                         | 1156                                          | 443                                            | 0.7                       | 310.1                                        |                     | 1466.1                                       | 367                                |                                   | 200                                     |                                                | 443                      | 0.75                           | 332.25                         |                    | 371.34                              | -39.09                         | -110.23                          | -149.32                       |          |
| 188              | 1971 | Wu Congyi                         | 2               | poor peasant             | 17                    | 2                      | 1                     | 1                       | 8                              | 1                         | 1                         | 6                              | 74                                     | 511                       | 126                              | 637                    | 22                                   | 5                                    | 32                                      | 59                              |                                                       | 74                                       | 34                         | 2516                                          | 578                                            | 0.7                       | 404.6                                        |                     | 2920.6                                       | 365                                |                                   | 400                                     |                                                | 578                      | 0.75                           | 433.50                         | 55.00              |                                     | 565.75                         | -77.25                           | -525.34                       | -602.59  |
| 189              | 1971 | Wu Laifu                          | 1               | poor peasant             | 17                    | 2                      | 1                     | 1                       | 6                              | 1                         | 1                         | 4                              | 54                                     | 439                       | 39                               | 478                    | 22                                   | 5                                    | 24                                      | 51                              |                                                       | 54                                       | 34                         | 1836                                          | 427                                            | 0.7                       | 298.9                                        |                     | 2134.9                                       | 356                                |                                   | 300                                     |                                                | 427                      | 0.75                           | 320.25                         |                    | 422.09                              | -101.84                        | -129.31                          | -231.15                       |          |
| 190              | 1971 | Tian Dayu                         | 2               | poor peasant             |                       |                        |                       |                         | 1                              |                           |                           | 1                              | 10                                     | 427                       | 5                                | 432                    |                                      |                                      | 4                                       | 4                               |                                                       | 10                                       | 34                         | 340                                           | 428                                            | 0.7                       | 299.6                                        |                     | 639.6                                        | 640                                |                                   | 50                                      |                                                | 428                      | 0.75                           | 321.00                         |                    |                                     | 422.59                         | -101.59                          | 315.13                        | 213.54   |
| 191              | 1971 | Liu Shuting                       | 2               | poor peasant             | 7                     | 1                      | 0                     | 1                       | 4                              |                           | 1                         | 3                              | 38                                     | 177                       | 43                               | 220                    | 9                                    | 2                                    | 16                                      | 27                              |                                                       | 38                                       | 34                         | 1292                                          | 193                                            | 0.7                       | 135.1                                        |                     | 1427.1                                       | 357                                |                                   | 200                                     |                                                | 193                      | 0.75                           | 144.75                         | 86.00              |                                     | 226.92                         | 3.83                             | 22.37                         | 26.20    |
| 192              | 1971 | Meng Tiande                       | 2               | poor peasant             | 17                    | 2                      | 1                     | 1                       | 7                              |                           | 1                         | 6                              | 68                                     | 783                       | 89                               | 872                    | 22                                   | 5                                    | 28                                      | 55                              |                                                       | 68                                       | 34                         | 2312                                          | 817                                            | 0.7                       | 571.9                                        |                     | 2883.9                                       | 412                                |                                   | 350                                     |                                                | 817                      | 0.75                           | 612.75                         | 1.78               |                                     | 581.88                         | 32.65                            | -270.11                       | -237.46  |



(cont.)

| Household number | Year | Name of the head of the household | Production team | Class status (1)           | Basic work points (2) | Total labor forces (3) | Male labor forces (4) | Female labor forces (5) | Total household population (6) | Age: 1 to 3 years old (7) | Age: 4 to 7 years old (8) | Age: 8 years old and above (9) | Work points of grain distribution (10) | Laboring work points (11) | Farmyard manure work points (12) | Total work points (13) | Work points of compulsory labor (14) | Work points of help cultivation (15) | Work points of private plots labor (16) | Total deducted work points (17) | Acutal workdays of participation in distribution (18) | Workpoints for rations distribution (19) | Rations per workpoint (20) | Total rations received form distribution (21) | Workdays of participation in distribu-tion (22) | Grains per workpoint (23) | Total grains distributed by work-points (24) | Grains subsidy (25) | Total Grains received from distribution (26) | Distributed grains per person (27) | Distributed grains per adult (28) | Grains received from privated plots (29) | Workdays of participation in distribution (30) | Value per workpoint (31) | Total value of workpoints (32) | Money used for investment (33) | Sum of income (34) | Money distributed in this year (34) | Deposit/ debt of this year (35) | Deposit/ debt over the years (36) | Accumulated deposit/debt (37) |
|------------------|------|-----------------------------------|-----------------|----------------------------|-----------------------|------------------------|-----------------------|-------------------------|--------------------------------|---------------------------|---------------------------|--------------------------------|----------------------------------------|---------------------------|----------------------------------|------------------------|--------------------------------------|--------------------------------------|-----------------------------------------|---------------------------------|-------------------------------------------------------|------------------------------------------|----------------------------|-----------------------------------------------|-------------------------------------------------|---------------------------|----------------------------------------------|---------------------|----------------------------------------------|------------------------------------|-----------------------------------|------------------------------------------|------------------------------------------------|--------------------------|--------------------------------|--------------------------------|--------------------|-------------------------------------|---------------------------------|-----------------------------------|-------------------------------|
| 193              | 1971 | Meng Xiulian                      | 2               | poor peasant               | 7                     | 1                      | 0                     | 1                       | 1                              |                           |                           | 1                              | 10                                     | 140                       | 5                                | 145                    | 9                                    | 2                                    | 4                                       | 15                              |                                                       | 10                                       | 34                         | 340                                           | 130                                             | 0.7                       | 91                                           |                     | 431                                          | 431                                |                                   | 50                                       | 130                                            | 0.75                     | 97.50                          |                                |                    | 81.68                               | 15.82                           |                                   | 15.82                         |
| 194              | 1971 | Tian Genlong                      | 2               | poor peasant               | 17                    | 2                      | 1                     | 1                       | 6                              | 1                         |                           | 5                              | 56                                     | 367                       | 84                               | 451                    | 22                                   | 5                                    | 24                                      | 51                              |                                                       | 56                                       | 34                         | 1904                                          | 400                                             | 0.7                       | 280                                          |                     | 2184                                         | 364                                |                                   | 300                                      | 400                                            | 0.75                     | 300.00                         |                                |                    | 438.51                              | -138.51                         | -346.33                           | -484.84                       |
| 195              | 1971 | Zhao Jinlan                       | 2               | poor peasant               | 7                     | 1                      | 0                     | 1                       | 5                              | 1                         | 1                         | 3                              | 44                                     | 87                        | 54                               | 141                    | 9                                    | 2                                    | 20                                      | 31                              |                                                       | 44                                       | 34                         | 1496                                          | 110                                             | 0.7                       | 77                                           | 50                  | 1623                                         | 325                                |                                   | 250                                      | 110                                            | 0.75                     | 82.50                          | 240.00                         |                    | 291.08                              | 31.42                           | 2.84                              | 34.26                         |
| 196              | 1971 | Liu Peiren                        | 2               | middle-class peasant       | 17                    | 2                      | 1                     | 1                       | 4                              | 1                         | 1                         | 2                              | 34                                     | 472                       | 83                               | 555                    | 22                                   | 5                                    | 16                                      | 43                              |                                                       | 34                                       | 34                         | 1156                                          | 512                                             | 0.7                       | 358.4                                        |                     | 1514.4                                       | 379                                |                                   | 200                                      | 512                                            | 0.75                     | 384.00                         |                                |                    | 332.21                              | 51.79                           | 50.18                             | 101.97                        |
| 197              | 1971 | Liu Peizhu                        | 2               | middle-class peasant       | 10                    | 1                      | 1                     | 0                       | 2                              |                           |                           | 2                              | 20                                     | 360                       | 7                                | 367                    | 13                                   | 3                                    | 8                                       | 24                              |                                                       | 20                                       | 34                         | 680                                           | 343                                             | 0.7                       | 240.1                                        |                     | 920.1                                        | 460                                |                                   | 100                                      | 343                                            | 0.75                     | 257.25                         |                                |                    | 256.97                              | 0.28                            | 46.14                             | 46.42                         |
| 198              | 1971 | Liu Peijie                        | 2               | middle-class peasant       | 15                    | 2                      | 1                     | 1                       | 5                              | 1                         |                           | 4                              | 46                                     | 305                       | 25                               | 330                    | 17                                   | 5                                    | 20                                      | 42                              |                                                       | 46                                       | 34                         | 1564                                          | 288                                             | 0.7                       | 201.6                                        |                     | 1765.6                                       | 353                                |                                   | 250                                      | 288                                            | 0.75                     | 216.00                         |                                |                    | 352.17                              | -136.17                         | 86.81                             | -49.36                        |
| 199              | 1971 | Meng Guilan                       | 2               | poor peasant               | 7                     | 1                      | 0                     | 1                       | 4                              | 1                         | 1                         | 2                              | 34                                     | 206                       | 34                               | 240                    | 9                                    | 2                                    | 16                                      | 27                              |                                                       | 34                                       | 34                         | 1156                                          | 213                                             | 0.7                       | 149.1                                        |                     | 1305.1                                       | 326                                |                                   | 200                                      | 213                                            | 0.75                     | 159.75                         | 70.00                          |                    | 219.57                              | 10.18                           | -36.00                            | -25.82                        |
| 200              | 1971 | Wang Lianxiang                    | 2               | poor peasant               | 7                     | 1                      | 0                     | 1                       | 2                              |                           |                           | 2                              | 20                                     | 201                       | 10                               | 211                    | 3                                    | 2                                    | 8                                       | 13                              |                                                       | 20                                       | 34                         | 680                                           | 198                                             | 0.7                       | 138.6                                        |                     | 818.6                                        | 409                                |                                   | 100                                      | 198                                            | 0.75                     | 148.50                         |                                |                    | 126.70                              | 21.80                           | 65.31                             | 87.11                         |
| 201              | 1971 | Wang Ende                         | 2               | poor peasant               |                       |                        |                       |                         | 2                              |                           |                           | 2                              | 20                                     | 218                       | 10                               | 228                    |                                      |                                      | 8                                       | 8                               |                                                       | 20                                       | 34                         | 680                                           | 220                                             | 0.7                       | 154                                          |                     | 834                                          | 417                                |                                   | 100                                      | 220                                            | 0.75                     | 165.00                         |                                |                    | 193.58                              | -28.58                          | 114.79                            | 86.21                         |
| 202              | 1971 | Meng Mingqing                     | 2               | low-middle-class peasant   |                       |                        |                       |                         | 2                              |                           |                           | 2                              | 20                                     | 270                       | 78                               | 348                    |                                      |                                      | 8                                       | 8                               |                                                       | 20                                       | 34                         | 680                                           | 340                                             | 0.7                       | 238                                          |                     | 918                                          | 459                                |                                   | 100                                      | 340                                            | 0.75                     | 255.00                         |                                |                    | 276.27                              | -21.27                          | 234.33                            | 213.06                        |
| 203              | 1971 | Meng Tianseng                     | 2               | low-middle-class peasant   | 17                    | 2                      | 1                     | 1                       | 4                              | 1                         | 1                         | 2                              | 34                                     | 588                       | 56                               | 644                    | 19                                   | 5                                    | 16                                      | 40                              |                                                       | 34                                       | 34                         | 1156                                          | 604                                             | 0.7                       | 422.8                                        | 40                  | 1618.8                                       | 405                                |                                   | 200                                      | 604                                            | 0.75                     | 453.00                         |                                |                    | 416.99                              | 36.01                           | 92.85                             | 128.86                        |
| 204              | 1971 | Wang Yueming                      | 2               | poor peasant               | 18                    | 3                      | 1                     | 2                       | 10                             | 1                         | 2                         | 7                              | 92                                     | 487                       | 123                              | 610                    | 23                                   | 5                                    | 40                                      | 68                              |                                                       | 92                                       | 34                         | 3128                                          | 542                                             | 0.7                       | 379.4                                        |                     | 3507.4                                       | 351                                |                                   | 500                                      | 542                                            | 0.75                     | 406.50                         | 175.00                         |                    | 530.81                              | 50.69                           | 31.61                             | 82.30                         |
| 205              | 1971 | Wang Heshun                       | 2               | poor peasant               | 24                    | 3                      | 1                     | 2                       | 6                              |                           | 1                         | 5                              | 58                                     | 700                       | 118                              | 818                    | 31                                   | 7                                    | 24                                      | 62                              |                                                       | 58                                       | 34                         | 1972                                          | 756                                             | 0.7                       | 529.2                                        |                     | 2501.2                                       | 417                                |                                   | 300                                      | 756                                            | 0.75                     | 567.00                         | 1.78                           |                    | 587.88                              | -19.10                          | 202.35                            | 183.25                        |
| 206              | 1971 | Wen Yingjie                       | 2               | upper-middle-class peasant | 18                    | 3                      | 1                     | 2                       | 4                              |                           |                           | 4                              | 40                                     | 710                       | 68                               | 778                    | 23                                   | 5                                    | 16                                      | 44                              |                                                       | 40                                       | 34                         | 1360                                          | 734                                             | 0.7                       | 513.8                                        |                     | 1873.8                                       | 468                                |                                   | 200                                      | 734                                            | 0.75                     | 550.50                         | 1.78                           |                    | 415.00                              | 137.28                          | 79.18                             | 216.46                        |
| 207              | 1971 | Liu Peiqian                       | 2               | low-middle-class peasant   | 40                    | 5                      | 3                     | 2                       | 10                             |                           |                           | 10                             | 100                                    | 1441                      | 145                              | 1586                   | 52                                   | 12                                   | 40                                      | 104                             |                                                       | 100                                      | 34                         | 3400                                          | 1482                                            | 0.7                       | 1037.4                                       | 100                 | 4537.4                                       | 454                                |                                   | 500                                      | 1482                                           | 0.75                     | 1111.50                        |                                |                    | 1136.54                             | -25.04                          | 336.55                            | 311.51                        |
| 208              | 1971 | Liu Zhaoji                        | 2               | low-middle-class peasant   | 17                    | 2                      | 1                     | 1                       | 4                              | 1                         |                           | 3                              | 36                                     | 487                       | 33                               | 520                    | 19                                   | 5                                    | 16                                      | 40                              |                                                       | 36                                       | 34                         | 1224                                          | 480                                             | 0.7                       | 336                                          |                     | 1560                                         | 390                                |                                   | 200                                      | 480                                            | 0.75                     | 360.00                         |                                |                    | 327.49                              | 32.51                           | 23.89                             | 56.40                         |
| 209              | 1971 | Yu Shengliang                     | 2               | poor peasant               | 6                     | 2                      | 0                     | 2                       | 3                              |                           |                           | 3                              | 30                                     | 449                       | 60                               | 509                    | 5                                    | 2                                    | 12                                      | 19                              |                                                       | 30                                       | 34                         | 1020                                          | 490                                             | 0.7                       | 343                                          |                     | 1363                                         | 454                                |                                   | 150                                      | 490                                            | 0.75                     | 367.50                         |                                |                    | 267.52                              | 99.98                           | -9.50                             | 90.48                         |
| 210              | 1971 | Meng Tianyou                      | 1               | poor peasant               |                       |                        |                       |                         | 1                              |                           |                           | 1                              | 10                                     | 179                       | 5                                | 184                    |                                      |                                      | 4                                       | 4                               |                                                       | 10                                       | 34                         | 340                                           | 180                                             | 0.7                       | 126                                          |                     | 466                                          | 466                                |                                   | 50                                       | 180                                            | 0.75                     | 135.00                         |                                |                    | 122.87                              | 12.13                           | 84.23                             | 96.36                         |
| 211              | 1971 | Meng Tianfu                       | 2               | middle-class peasant       | 22                    | 3                      | 1                     | 2                       | 7                              | 1                         |                           | 6                              | 66                                     | 670                       | 148                              | 818                    | 29                                   | 7                                    | 28                                      | 64                              |                                                       | 66                                       | 34                         | 2244                                          | 754                                             | 0.7                       | 527.8                                        | 100                 | 2871.8                                       | 410                                |                                   | 350                                      | 754                                            | 0.75                     | 565.50                         |                                |                    | 647.99                              | -82.49                          | 36.00                             | -46.49                        |
| 212              | 1971 | Meng Xisheng                      | 2               | middle-class peasant       | 17                    | 2                      | 1                     | 1                       | 5                              | 2                         | 1                         | 2                              | 40                                     | 416                       | 126                              | 542                    | 20                                   | 5                                    | 20                                      | 45                              |                                                       | 40                                       | 34                         | 1360                                          | 497                                             | 0.7                       | 347.9                                        |                     | 1707.9                                       | 342                                |                                   | 250                                      | 497                                            | 0.75                     | 372.75                         |                                |                    | 378.69                              | -5.94                           | 59.37                             | 53.43                         |
| 213              | 1971 | Gui Tiankuan                      | 2               | poor peasant               | 45                    | 6                      | 3                     | 3                       | 10                             | 1                         |                           | 9                              | 96                                     | 1470                      | 118                              | 1588                   | 56                                   | 14                                   | 40                                      | 110                             |                                                       | 96                                       | 34                         | 3264                                          | 1478                                            | 0.7                       | 1034.6                                       | 100                 | 4398.6                                       | 440                                |                                   | 500                                      | 1478                                           | 0.75                     | 1108.50                        | 27.37                          |                    | 897.68                              | 238.19                          | 376.99                            | 615.18                        |
| 214              | 1971 | Kang Huaizhi                      | 2               | poor peasant               | 17                    | 2                      | 1                     | 1                       | 7                              | 1                         | 1                         | 5                              | 64                                     | 526                       | 61                               | 587                    | 22                                   | 5                                    | 28                                      | 55                              |                                                       | 64                                       | 34                         | 2176                                          | 532                                             | 0.7                       | 372.4                                        |                     | 2548.4                                       | 364                                |                                   | 350                                      | 532                                            | 0.75                     | 399.00                         |                                |                    | 473.11                              | -74.11                          | -1222.51                          | -1296.62                      |

(cont.)

| Household number | Year | Name of the head of the household | Production team | Class status (1)         | Basic work points (2) | Total labor forces (3) | Male labor forces (4) | Female labor forces (5) | Total household population (6) | Age: 1 to 3 years old (7) | Age: 4 to 7 years old (8) | Age: 8 years old and above (9) | Work points of grain distribution (10) | Laboring work points (11) | Farmyard manure work points (12) | Total work points (13) | Work points of compulsory labor (14) | Work points of help cultivation (15) | Work points of private plots labor (16) | Total deducted work points (17) | Actual workdays of participation in distribution (18) | Workpoints for rations distribution (19) | Rations per workpoint (20) | Total rations received from distribution (21) | Workdays of participation in distribution (22) | Grains per workpoint (23) | Total grains distributed by work-points (24) | Grains subsidy (25) | Total Grains received from distribution (26) | Distributed grains per person (27) | Distributed grains per adult (28) | Grains received from private plots (29) | Workdays of participation in distribution (30) | Value per workpoint (31) | Total value of workpoints (32) | Money used for investment (33) | Sum of income (34) | Money distributed in this year (34) | Deposit/debt of this year (35) | Deposit/debt over the years (36) | Accumulated deposit/debt (37) |
|------------------|------|-----------------------------------|-----------------|--------------------------|-----------------------|------------------------|-----------------------|-------------------------|--------------------------------|---------------------------|---------------------------|--------------------------------|----------------------------------------|---------------------------|----------------------------------|------------------------|--------------------------------------|--------------------------------------|-----------------------------------------|---------------------------------|-------------------------------------------------------|------------------------------------------|----------------------------|-----------------------------------------------|------------------------------------------------|---------------------------|----------------------------------------------|---------------------|----------------------------------------------|------------------------------------|-----------------------------------|-----------------------------------------|------------------------------------------------|--------------------------|--------------------------------|--------------------------------|--------------------|-------------------------------------|--------------------------------|----------------------------------|-------------------------------|
| 215              | 1971 | Liu Huaiqing                      | 2               | poor peasant             | 15                    | 2                      | 1                     | 1                       | 6                              | 1                         | 1                         | 4                              | 54                                     | 388                       | 46                               | 434                    | 20                                   | 5                                    | 24                                      | 49                              |                                                       | 54                                       | 34                         | 1836                                          | 385                                            | 0.7                       | 269.5                                        |                     | 2105.5                                       | 351                                |                                   | 300                                     | 285                                            | 0.75                     | 213.75                         |                                | 386.56             | -172.81                             | 125.01                         | -47.80                           |                               |
| 216              | 1971 | Meng Xiuying                      | 1               | poor peasant             | 24                    | 3                      | 1                     | 2                       | 4                              | 1                         |                           | 3                              | 36                                     | 622                       | 62                               | 684                    | 31                                   | 7                                    | 16                                      | 54                              |                                                       | 36                                       | 34                         | 1224                                          | 630                                            | 0.7                       | 441                                          | 100                 | 1765                                         | 441                                |                                   | 200                                     | 630                                            | 0.75                     | 472.50                         |                                | 382.13             | 90.37                               | 32.95                          | 123.32                           |                               |
| 217              | 1971 | Meng Peiliang                     | 2               | middle-class peasant     | 44                    | 5                      | 3                     | 2                       | 10                             | 1                         | 3                         | 6                              | 90                                     | 1282                      | 172                              | 1454                   | 68                                   | 16                                   | 40                                      | 124                             |                                                       | 90                                       | 34                         | 3060                                          | 1330                                           | 0.7                       | 931                                          |                     | 3991                                         | 399                                |                                   | 500                                     | 1330                                           | 0.75                     | 997.50                         |                                | 851.49             | 146.01                              | 100.71                         | 246.72                           |                               |
| 218              | 1971 | Meng Mingcheng                    | 2               | middle-class peasant     | 24                    | 3                      | 1                     | 2                       | 4                              |                           |                           | 4                              | 40                                     | 611                       | 60                               | 671                    | 31                                   | 7                                    | 16                                      | 54                              |                                                       | 40                                       | 34                         | 1500                                          | 617                                            | 0.7                       | 431.9                                        |                     | 1931.9                                       | 386                                |                                   | 200                                     | 617                                            | 0.75                     | 462.75                         | 1.78                           | 374.38             | 90.15                               | -268.85                        | -178.70                          |                               |
| 219              | 1971 | Wu Shi'en                         | 1               | poor peasant             | 24                    | 3                      | 1                     | 2                       | 6                              | 1                         | 1                         | 4                              | 54                                     | 523                       | 101                              | 624                    | 29                                   | 7                                    | 24                                      | 60                              |                                                       | 54                                       | 34                         | 1836                                          | 564                                            | 0.7                       | 394.8                                        |                     | 2230.8                                       | 372                                |                                   | 300                                     | 564                                            | 0.75                     | 423.00                         |                                | 432.07             | -9.07                               | -163.84                        | -172.91                          |                               |
| 220              | 1971 | Wang Qingwen                      | 1               | poor peasant             | 17                    | 2                      | 1                     | 1                       | 4                              |                           |                           | 4                              | 40                                     | 619                       | 120                              | 739                    | 22                                   | 5                                    | 16                                      | 43                              |                                                       | 40                                       | 34                         | 1360                                          | 696                                            | 0.7                       | 487.2                                        |                     | 1847.2                                       | 462                                |                                   | 200                                     | 692                                            | 0.75                     | 519.00                         |                                | 477.31             | 41.69                               | 207.04                         | 248.73                           |                               |
| 221              | 1971 | Ji Chunmei                        | 1               | poor peasant             |                       |                        |                       |                         | 1                              |                           |                           | 1                              |                                        |                           |                                  | 0                      |                                      |                                      | 4                                       | 4                               |                                                       | 10                                       | 34                         | 340                                           | 0                                              | 0.7                       | 0                                            |                     | 340                                          | 340                                |                                   | 50                                      |                                                | 0.75                     | 0.00                           |                                | 79.86              | -79.86                              | -276.57                        | -356.43                          |                               |
| 222              | 1971 | Li Yushu                          | 2               | poor peasant             | 10                    | 1                      | 1                     | 0                       | 3                              |                           | 1                         | 2                              | 28                                     | 523                       | 100                              | 623                    | 13                                   | 3                                    | 12                                      | 28                              |                                                       | 28                                       | 34                         | 952                                           | 595                                            | 0.7                       | 416.5                                        |                     | 1368.5                                       | 456                                |                                   | 150                                     | 595                                            | 0.75                     | 446.25                         |                                | 325.44             | 120.81                              | 93.57                          | 214.38                           |                               |
| 223              | 1971 | Yu Zhenji                         | 2               | poor peasant             | 10                    | 1                      | 1                     | 0                       | 1                              |                           |                           | 1                              | 10                                     | 230                       | 5                                | 235                    | 13                                   | 3                                    | 4                                       | 20                              |                                                       | 10                                       | 34                         | 340                                           | 215                                            | 0.7                       | 150.5                                        |                     | 490.5                                        | 491                                |                                   | 50                                      | 215                                            | 0.75                     | 161.25                         |                                | 143.95             | 17.30                               | -174.36                        | -157.06                          |                               |
| 224              | 1971 | Meng Jinxi                        | 0               | poor peasant             |                       |                        |                       |                         | 1                              |                           |                           | 1                              | 10                                     |                           |                                  | 0                      |                                      |                                      | 0                                       | 0                               |                                                       | 10                                       | 34                         | 340                                           | 0                                              | 0.7                       | 0                                            | 30                  | 370                                          | 370                                |                                   | 50                                      |                                                | 0.75                     | 0.00                           |                                | 89.30              | -89.30                              | -432.97                        | -522.27                          |                               |
| 225              | 1971 | Li Guangkai                       | 0               | poor peasant             |                       |                        |                       |                         | 1                              |                           |                           | 1                              | 10                                     | 182                       | 5                                | 187                    |                                      |                                      | 4                                       | 4                               |                                                       | 10                                       | 34                         | 340                                           | 183                                            | 0.7                       | 128.1                                        |                     | 468.1                                        | 468                                |                                   | 50                                      | 183                                            | 0.75                     | 137.25                         |                                | 154.14             | -16.89                              | 129.74                         | 112.85                           |                               |
| 226              | 1971 | Liu Jigeng                        | 2               | poor peasant             | 36                    | 5                      | 3                     | 2                       | 8                              | 1                         | 1                         | 6                              | 74                                     | 947                       | 65                               | 1012                   | 44                                   | 11                                   | 32                                      | 87                              |                                                       | 74                                       | 34                         | 2516                                          | 925                                            | 0.7                       | 647.5                                        |                     | 3163.5                                       | 395                                |                                   | 400                                     | 925                                            | 0.75                     | 693.75                         |                                | 978.88             | -285.13                             | 509.31                         | 224.18                           |                               |
| 227              | 1971 | Fan Shuzhi                        | 1               | middle-class peasant     | 17                    | 2                      | 1                     | 1                       | 5                              | 1                         |                           | 4                              | 46                                     | 332                       | 70                               | 402                    | 22                                   | 5                                    | 20                                      | 47                              |                                                       | 46                                       | 34                         | 1564                                          | 355                                            | 0.7                       | 248.5                                        |                     | 1812.5                                       | 363                                |                                   | 250                                     | 355                                            | 0.75                     | 266.25                         |                                | 338.62             | -72.37                              | -149.89                        | -222.26                          |                               |
| 228              | 1971 | Ji Guanglian                      | 1               | low-middle-class peasant | 7                     | 1                      | 0                     | 1                       | 4                              | 1                         | 1                         | 2                              | 34                                     |                           | 20                               | 20                     | 9                                    | 2                                    | 16                                      | 27                              |                                                       | 34                                       | 34                         | 1156                                          |                                                | 0.7                       | 0                                            | 120                 | 1276                                         | 319                                |                                   | 200                                     |                                                | 0.75                     | 0.00                           | 180.00                         | 193.53             | -13.53                              |                                | -13.53                           |                               |
| 229              | 1971 | Yang Xiaozhong                    | 1               | low-middle-class peasant | 17                    | 2                      | 1                     | 1                       | 3                              | 1                         |                           | 2                              | 26                                     | 448                       | 15                               | 463                    | 22                                   | 5                                    | 12                                      | 39                              |                                                       | 26                                       | 34                         | 884                                           | 424                                            | 0.7                       | 296.8                                        |                     | 1180.8                                       | 394                                |                                   | 150                                     | 424                                            | 0.75                     | 318.00                         |                                | 297.10             | 20.90                               |                                | 20.90                            |                               |
| 230              | 1971 | Meng Minghong                     | 2               | middle-class peasant     | 17                    | 2                      | 1                     | 1                       | 3                              | 1                         |                           | 2                              | 26                                     | 447                       | 15                               | 462                    | 22                                   | 5                                    | 12                                      | 39                              |                                                       | 26                                       | 34                         | 884                                           | 423                                            | 0.7                       | 296.1                                        |                     | 1180.1                                       | 393                                |                                   | 150                                     | 423                                            | 0.75                     | 317.25                         |                                | 288.45             | 28.80                               |                                | 28.80                            |                               |
| 231              | 1971 | Zhang Xuewen                      | 0               | poor peasant             | 17                    | 2                      | 1                     | 1                       | 3                              | 1                         |                           | 2                              | 26                                     | 523                       | 27                               | 550                    | 22                                   | 5                                    | 12                                      | 39                              |                                                       | 26                                       | 34                         | 884                                           | 511                                            | 0.7                       | 357.7                                        |                     | 1241.7                                       | 414                                |                                   | 150                                     | 511                                            | 0.75                     | 383.25                         |                                | 374.53             | 8.72                                |                                | 8.72                             |                               |
| 232              | 1971 | Wu Jingxiu                        | 0               | middle-class peasant     | 10                    | 2                      | 0                     | 2                       | 3                              |                           |                           | 3                              | 30                                     | 334                       | 28                               | 362                    | 13                                   | 3                                    | 12                                      | 28                              |                                                       | 30                                       | 34                         | 1020                                          | 334                                            | 0.7                       | 233.8                                        |                     | 1253.8                                       | 418                                |                                   | 150                                     | 334                                            | 0.75                     | 250.50                         |                                | 300.33             | -49.83                              |                                | -49.83                           |                               |
| 233              | 1971 | Fan Shugen                        | 1               | middle-class peasant     | 17                    | 2                      | 1                     | 1                       | 3                              | 1                         |                           | 2                              | 26                                     | 635                       | 15                               | 650                    | 22                                   | 5                                    | 12                                      | 39                              |                                                       | 26                                       | 34                         | 884                                           | 611                                            | 0.7                       | 427.7                                        |                     | 1311.7                                       | 437                                |                                   | 150                                     | 611                                            | 0.75                     | 458.25                         |                                | 374.59             | 83.66                               |                                | 83.66                            |                               |
| 1                | 1972 | Meng Tianyun                      | 2               | poor peasant             | 18                    | 3                      | 1                     | 2                       | 8                              | 2                         |                           | 6                              | 76                                     | 325.3                     | 155.4                            | 481                    |                                      |                                      |                                         | 27                              |                                                       | 76                                       | 33.3                       | 2486                                          | 454                                            | 1                         | 454                                          |                     | 2940                                         | 367                                |                                   | 560                                     | 394                                            | 1.02                     | 410.88                         | 80.00                          | 476.30             | 5.58                                | 74.21                          | 79.79                            |                               |
| 2                | 1972 | Yang Fengming                     | 1               | middle-class peasant     | 11                    | 2                      | 1                     | 1                       | 2                              |                           |                           | 2                              | 20                                     | 300.6                     | 41.2                             | 342                    |                                      |                                      |                                         | 17                              |                                                       | 20                                       | 33.3                       | 666                                           | 325                                            | 1                         | 325                                          |                     | 991                                          | 495                                |                                   | 140                                     | 325                                            | 1.04                     | 337.79                         |                                | 245.51             | 92.28                               | 46.50                          | 138.78                           |                               |
| 3                | 1972 | Li Chengxin                       | 1               | poor peasant             | 35                    | 4                      | 3                     | 1                       | 8                              |                           |                           | 8                              | 80                                     | 653.4                     | 31                               | 684                    |                                      |                                      |                                         | 53                              |                                                       | 80                                       | 33.3                       | 2664                                          | 631                                            | 1                         | 631                                          |                     | 3295                                         | 412                                |                                   | 560                                     | 631                                            | 1.04                     | 656.66                         |                                | 642.79             | 13.87                               | -430.79                        | -416.92                          |                               |
| 4                | 1972 | Li Zeying                         | 1               | poor peasant             |                       |                        |                       |                         |                                |                           |                           |                                |                                        |                           |                                  | 0                      |                                      |                                      |                                         |                                 | 0                                                     | 33.3                                     | 0                          | 0                                             | 0                                              | 1                         | 0                                            |                     | 0                                            |                                    | 0                                 | 0                                       | 1.04                                           | 0.00                     |                                |                                | 0.00               |                                     | 0.00                           |                                  |                               |

(cont.)

| Household number | Year | Name of the head of the household | Production team | Class status (1)         | Basic work points (2) | Total labor forces (3) | Male labor forces (4) | Female labor forces (5) | Total household population (6) | Age: 1 to 3 years old (7) | Age: 4 to 7 years old (8) | Age: 8 years old and above (9) | Work points of grain distribution (10) | Laboring work points (11) | Farmyard manure work points (12) | Total work points (13) | Work points of compulsory labor (14) | Work points of help cultivation (15) | Work points of private plots labor (16) | Total deducted work points (17) | Acutal workdays of participation in distribution (18) | Workpoints for rations distribution (19) | Rations per workpoint (20) | Total rations received form distribution (21) | Workdays of participation in distribu-tion (22) | Grains per workpoint (23) | Total grains distributed by work-points (24) | Grains subsidy (25) | Total Grains received from distribution (26) | Distributed grains per person (27) | Distributed grains per adult (28) | Grains received from privated plots (29) | Workdays of participation in distribution (30) | Value per workpoint (31) | Total value of workpoints (32) | Money used for investment (33) | Sum of income (34) | Money distributed in this year (34) | Deposit/ debt of this year (35) | Deposit/ debt over the years (36) | Accumulated deposit/debt (37) |
|------------------|------|-----------------------------------|-----------------|--------------------------|-----------------------|------------------------|-----------------------|-------------------------|--------------------------------|---------------------------|---------------------------|--------------------------------|----------------------------------------|---------------------------|----------------------------------|------------------------|--------------------------------------|--------------------------------------|-----------------------------------------|---------------------------------|-------------------------------------------------------|------------------------------------------|----------------------------|-----------------------------------------------|-------------------------------------------------|---------------------------|----------------------------------------------|---------------------|----------------------------------------------|------------------------------------|-----------------------------------|------------------------------------------|------------------------------------------------|--------------------------|--------------------------------|--------------------------------|--------------------|-------------------------------------|---------------------------------|-----------------------------------|-------------------------------|
| 5                | 1972 | Gao Peizhong                      | 1               | poor peasant             | 24                    | 3                      | 1                     | 2                       | 8                              | 1                         |                           | 7                              | 78                                     | 544.3                     | 67.9                             | 612                    |                                      |                                      |                                         | 36                              |                                                       | 78                                       | 33.3                       | 2597.4                                        | 576                                             | 1                         | 576                                          |                     | 3174                                         | 397                                |                                   | 560                                      | 576                                            | 1.04                     | 599.25                         |                                | 662.41             | -63.16                              | -386.82                         | -449.98                           |                               |
| 6                | 1972 | Kong Qingquan                     | 1               | poor peasant             | 14                    | 2                      | 0                     | 2                       | 5                              |                           |                           | 5                              | 50                                     | 536.8                     | 88.4                             | 625                    |                                      |                                      |                                         | 21                              |                                                       | 50                                       | 33.3                       | 1665                                          | 604                                             | 1                         | 604                                          |                     | 2269                                         | 454                                |                                   | 350                                      | 604                                            | 1.04                     | 628.37                         |                                | 479.34             | 149.03                              | 162.48                          | 311.51                            |                               |
| 7                | 1972 | Li Chengren                       | 1               | middle-class peasant     |                       |                        |                       |                         | 2                              |                           |                           | 2                              | 20                                     | 52.8                      | 59                               | 112                    |                                      |                                      |                                         |                                 |                                                       | 20                                       | 33.3                       | 666                                           | 112                                             | 1                         | 112                                          |                     | 778                                          |                                    | 389                               | 140                                      | 112                                            | 1.04                     | 116.27                         |                                | 163.14             | -46.87                              | -185.67                         | -232.54                           |                               |
| 8                | 1972 | Wu Jixiang                        | 1               | middle-class peasant     | 7                     | 1                      | 0                     | 1                       | 5                              | 1                         | 1                         | 3                              | 47                                     | 20.5                      | 15.4                             | 36                     |                                      |                                      |                                         | 11                              |                                                       | 47                                       | 33.3                       | 1565.1                                        | 25                                              | 1                         | 25                                           |                     | 1590                                         | 318                                |                                   | 350                                      | 25                                             | 1.04                     | 25.90                          | 230.00                         | 257.82             | -1.92                               | -15.18                          | -17.10                            |                               |
| 9                | 1972 | Kong Fangyu                       | 1               | poor peasant             | 7                     | 1                      | 0                     | 1                       | 2                              | 1                         |                           | 1                              | 18                                     | 11.5                      | 20                               | 32                     |                                      |                                      |                                         | 11                              |                                                       | 18                                       | 33.3                       | 599.4                                         | 21                                              | 1                         | 21                                           |                     | 620                                          | 310                                |                                   | 140                                      | 21                                             | 1.04                     | 21.32                          | 100.00                         | 104.52             | 16.80                               | -74.69                          | -57.89                            |                               |
| 10               | 1972 | Gao Wei                           | 1               | poor peasant             | 20                    | 3                      | 1                     | 2                       | 4                              |                           |                           | 4                              | 40                                     | 670.7                     | 64                               | 735                    |                                      |                                      |                                         | 30                              |                                                       | 40                                       | 33.3                       | 1332                                          | 705                                             | 1                         | 705                                          |                     | 2037                                         | 509                                |                                   | 280                                      | 705                                            | 1.04                     | 732.89                         |                                | 501.36             | 231.53                              | 303.80                          | 535.33                            |                               |
| 11               | 1972 | Gao Jun                           | 1               | poor peasant             |                       |                        |                       |                         | 1                              |                           |                           | 1                              | 10                                     | 144.0                     |                                  | 144                    |                                      |                                      |                                         |                                 |                                                       | 10                                       | 33.3                       | 333                                           | 144                                             | 1                         | 144                                          |                     | 477                                          | 477                                |                                   | 70                                       | 144                                            | 1.04                     | 149.76                         |                                | 98.64              | 51.12                               | 38.75                           | 89.87                             |                               |
| 12               | 1972 | Gao Peixiao                       | 1               | poor peasant             | 17                    | 2                      | 1                     | 1                       | 5                              | 2                         | 1                         | 2                              | 45                                     | 434.4                     | 102                              | 536                    |                                      |                                      |                                         | 26                              |                                                       | 45                                       | 33.3                       | 1498.5                                        | 510                                             | 1                         | 510                                          | 20                  | 2029                                         | 406                                |                                   | 350                                      | 510                                            | 1.04                     | 530.82                         |                                | 428.67             | 102.15                              | 47.55                           | 149.70                            |                               |
| 13               | 1972 | Gao Shang                         | 1               | poor peasant             |                       |                        |                       |                         | 1                              |                           |                           | 1                              | 10                                     | 55.1                      | 27.9                             | 83                     |                                      |                                      |                                         |                                 |                                                       | 10                                       | 33.3                       | 278                                           | 83                                              | 1                         | 83                                           |                     | 361                                          | 361                                |                                   | 70                                       | 83                                             | 1.04                     | 86.32                          |                                | 161.44             | -75.12                              | -96.80                          | -171.92                           |                               |
| 14               | 1972 | Mu Zhaolin                        | 1               | poor peasant             | 17                    | 2                      | 1                     | 1                       | 5                              | 2                         |                           | 3                              | 46                                     | 443.0                     | 85.3                             | 528                    |                                      |                                      |                                         | 26                              |                                                       | 46                                       | 33.3                       | 1443                                          | 502                                             | 1                         | 502                                          | 20                  | 1965                                         | 393                                |                                   | 350                                      | 502                                            | 1.04                     | 522.39                         |                                | 406.21             | 116.18                              | 44.44                           | 160.62                            |                               |
| 15               | 1972 | Cao Cuizhen                       | 2               | poor peasant             | 30                    | 4                      | 2                     | 2                       | 6                              |                           |                           | 6                              | 60                                     | 853.2                     | 78.5                             | 932                    |                                      |                                      |                                         | 45                              |                                                       | 60                                       | 33.3                       | 2081                                          | 887                                             | 1                         | 887                                          |                     | 2968                                         | 495                                |                                   | 420                                      | 887                                            | 1.02                     | 904.43                         |                                | 769.90             | 134.53                              | 388.27                          | 522.80                            |                               |
| 16               | 1972 | Cao Jianren                       | 2               | poor peasant             | 17                    | 2                      | 1                     | 1                       | 6                              | 2                         | 2                         | 2                              | 54                                     | 503.9                     | 61.1                             | 565                    |                                      |                                      |                                         | 26                              |                                                       | 54                                       | 33.3                       | 1798.2                                        | 539                                             | 1                         | 539                                          | 90                  | 2427                                         | 405                                |                                   | 420                                      | 494                                            | 1.02                     | 508.98                         |                                | 500.19             | 8.79                                | -19.50                          | -10.71                            |                               |
| 17               | 1972 | Liu Guiwu                         | 1               | poor peasant             |                       |                        |                       |                         |                                |                           |                           |                                |                                        |                           |                                  | 0                      |                                      |                                      |                                         |                                 | 0                                                     | 33.3                                     | 0                          | 0                                             | 1                                               | 0                         |                                              | 0                   |                                              | 0                                  |                                   | 0                                        | 0                                              | 1.04                     | 0.00                           | 932.29                         | 37.54              | 894.75                              | -897.25                         | -2.50                             |                               |
| 18               | 1972 | Meng Mingde                       | 1               | poor peasant             | 28                    | 4                      | 2                     | 2                       | 8                              | 1                         |                           | 7                              | 78                                     | 931.5                     | 111.6                            | 1043                   |                                      |                                      |                                         | 42                              |                                                       | 78                                       | 33.3                       | 2597.4                                        | 1001                                            | 1                         | 1001                                         |                     | 3599                                         | 450                                |                                   | 560                                      | 1001                                           | 1.04                     | 1041.14                        |                                | 800.18             | 240.96                              | 360.14                          | 601.10                            |                               |
| 19               | 1972 | Mu Shouliang                      | 1               | poor peasant             |                       |                        |                       |                         | 2                              |                           |                           | 2                              | 20                                     | 21.6                      | 50                               | 72                     |                                      |                                      |                                         |                                 |                                                       | 20                                       | 33.3                       | 666                                           | 72                                              | 1                         | 72                                           |                     | 738                                          | 369                                |                                   | 140                                      | 72                                             | 1.04                     | 74.46                          |                                | 140.39             | -65.93                              | -106.07                         | -172.00                           |                               |
| 20               | 1972 | Meng Mingbao                      | 1               | poor peasant             | 38                    | 5                      | 3                     | 2                       | 5                              |                           |                           | 5                              | 50                                     | 748.1                     | 2                                | 750                    |                                      |                                      |                                         | 57                              |                                                       | 50                                       | 33.3                       | 1582                                          | 693                                             | 1                         | 693                                          |                     | 2275                                         | 455                                |                                   | 350                                      | 693                                            | 1.04                     | 720.82                         |                                | 728.24             | -7.42                               | 430.32                          | 422.90                            |                               |
| 21               | 1972 | Meng Mingjin                      | 1               | poor peasant             | 3                     | 1                      | 0                     | 1                       | 2                              |                           |                           | 2                              | 20                                     | 329.0                     | 53                               | 382                    |                                      |                                      |                                         | 5                               |                                                       | 20                                       | 33.3                       | 666                                           | 377                                             | 1                         | 377                                          |                     | 1043                                         | 522                                |                                   | 140                                      | 377                                            | 1.04                     | 392.08                         |                                | 254.75             | 137.33                              | 29.21                           | 166.54                            |                               |
| 22               | 1972 | Liang Shiren                      | 1               | low-middle-class peasant |                       |                        |                       |                         | 2                              |                           |                           | 2                              | 20                                     |                           | 30                               | 30                     |                                      |                                      |                                         |                                 |                                                       | 20                                       | 33.3                       | 666                                           | 30                                              | 1                         | 30                                           |                     | 696                                          | 348                                |                                   | 140                                      | 30                                             | 1.04                     | 31.20                          |                                | 100.55             | -69.35                              | -200.18                         | -269.53                           |                               |
| 23               | 1972 | Liang Yingfu                      | 1               | low-middle-class peasant | 10                    | 1                      | 1                     | 0                       | 4                              |                           |                           | 4                              | 40                                     | 373.4                     | 72                               | 445                    |                                      |                                      |                                         | 15                              |                                                       | 40                                       | 33.3                       | 1332                                          | 430                                             | 1                         | 430                                          | 20                  | 1782                                         | 446                                |                                   | 280                                      | 430                                            | 1.04                     | 447.62                         |                                | 424.31             | 23.31                               | -267.42                         | -244.11                           |                               |
| 24               | 1972 | Lei Guangzhi                      | 1               | low-middle-class peasant | 17                    | 2                      | 1                     | 1                       | 2                              |                           |                           | 2                              | 20                                     | 224.1                     | 42.2                             | 266                    |                                      |                                      |                                         | 26                              |                                                       | 20                                       | 33.3                       | 749                                           | 240                                             | 1                         | 240                                          |                     | 989                                          | 495                                |                                   | 140                                      | 240                                            | 1.04                     | 249.91                         |                                | 242.75             | 7.16                                | -632.05                         | -624.89                           |                               |
| 25               | 1972 | Fan Lishi                         | 1               | middle-class peasant     | 27                    | 3                      | 2                     | 1                       | 7                              |                           |                           | 7                              | 70                                     | 825.4                     | 142.2                            | 968                    |                                      |                                      |                                         | 41                              |                                                       | 70                                       | 33.3                       | 2331                                          | 927                                             | 1                         | 927                                          |                     | 3258                                         | 465                                |                                   | 490                                      | 927                                            | 1.04                     | 963.66                         | 31.39                          | 725.05             | 270.00                              | 273.74                          | 543.74                            |                               |
| 26               | 1972 | Zhang Quangui                     | 1               | middle-class peasant     |                       |                        |                       |                         | 1                              |                           |                           | 1                              | 10                                     | 29.8                      |                                  | 30                     |                                      |                                      |                                         |                                 |                                                       | 10                                       | 33.3                       | 333                                           | 30                                              | 1                         | 30                                           |                     | 363                                          | 363                                |                                   | 70                                       | 30                                             | 1.04                     | 30.99                          | 100.00                         | 69.76              | 61.44                               | -278.18                         | -216.74                           |                               |
| 27               | 1972 | Wang Bangjie                      | 1               | low-middle-class peasant | 17                    | 2                      | 1                     | 1                       | 3                              |                           |                           | 3                              | 30                                     | 369.7                     | 70.5                             | 440                    |                                      |                                      |                                         | 26                              |                                                       | 30                                       | 33.3                       | 999                                           | 414                                             | 1                         | 414                                          | 30                  | 1443                                         | 481                                |                                   | 210                                      | 414                                            | 1.04                     | 430.77                         |                                | 339.21             | 91.56                               | -103.48                         | -11.92                            |                               |

(cont.)

| Household number | Year | Name of the head of the household | Production team | Class status (1)           | Basic work points (2) | Total labor forces (3) | Male labor forces (4) | Female labor forces (5) | Total household population (6) | Age: 1 to 3 years old (7) | Age: 4 to 7 years old (8) | Age: 8 years old and above (9) | Work points of grain distribution (10) | Laboring work points (11) | Farmyard manure work points (12) | Total work points (13) | Work points of compulsory labor (14) | Work points of help cultivation (15) | Work points of private plots labor (16) | Total deducted work points (17) | Actual workdays of participation in distribution (18) | Workpoints for rations distribution (19) | Rations per workpoint (20) | Total rations received from distribution (21) | Workdays of participation in distribution (22) | Grains per workpoint (23) | Total grains distributed by work-points (24) | Grains subsidy (25) | Total Grains received from distribution (26) | Distributed grains per person (27) | Distributed grains per adult (28) | Grains received from private plots (29) | Workdays of participation in distribution (30) | Value per workpoint (31) | Total value of workpoints (32) | Money used for investment (33) | Sum of income (34) | Money distributed in this year (34) | Deposit/debt of this year (35) | Deposit/debt over the years (36) | Accumulated deposit/debt (37) |
|------------------|------|-----------------------------------|-----------------|----------------------------|-----------------------|------------------------|-----------------------|-------------------------|--------------------------------|---------------------------|---------------------------|--------------------------------|----------------------------------------|---------------------------|----------------------------------|------------------------|--------------------------------------|--------------------------------------|-----------------------------------------|---------------------------------|-------------------------------------------------------|------------------------------------------|----------------------------|-----------------------------------------------|------------------------------------------------|---------------------------|----------------------------------------------|---------------------|----------------------------------------------|------------------------------------|-----------------------------------|-----------------------------------------|------------------------------------------------|--------------------------|--------------------------------|--------------------------------|--------------------|-------------------------------------|--------------------------------|----------------------------------|-------------------------------|
| 28               | 1972 | Meng Tianxing                     | 1               | low-middle-class peasant   | 17                    | 2                      | 1                     | 1                       | 6                              | 1                         | 1                         | 4                              | 57                                     | 373.0                     | 79.6                             | 453                    |                                      |                                      |                                         | 26                              |                                                       | 57                                       | 33.3                       | 1898.1                                        | 427                                            | 1                         | 427                                          | 20                  | 2345                                         | 391                                |                                   | 420                                     | 427                                            | 1.04                     | 443.66                         |                                |                    | 460.08                              | -16.42                         | -129.35                          | -145.77                       |
| 29               | 1972 | Xue Baolin                        | 1               | low-middle-class peasant   | 7                     | 1                      | 0                     | 1                       | 5                              | 1                         | 1                         | 3                              | 47                                     |                           |                                  | 0                      |                                      |                                      |                                         | 11                              |                                                       | 47                                       | 33.3                       | 1565.1                                        | 0                                              | 1                         | 0                                            |                     | 1565                                         | 313                                |                                   | 350                                     | 0                                              | 1.04                     | 0.00                           | 285.00                         | 258.23             | 26.77                               | -6.69                          | 20.08                            |                               |
| 30               | 1972 | Cao Cuiheng                       | 1               | low-middle-class peasant   | 3                     | 1                      | 0                     | 1                       | 2                              |                           |                           | 2                              | 20                                     | 269.7                     | 47.2                             | 317                    |                                      |                                      |                                         | 5                               |                                                       | 20                                       | 33.3                       | 666                                           | 312                                            | 1                         | 312                                          |                     | 978                                          | 489                                |                                   | 140                                     | 312                                            | 1.04                     | 324.38                         |                                |                    | 267.52                              | 56.86                          | 145.75                           | 202.61                        |
| 31               | 1972 | Ma Hongxiang                      | 1               | low-middle-class peasant   | 7                     | 1                      | 0                     | 1                       | 2                              | 1                         |                           | 1                              | 18                                     | 124.7                     | 33.8                             | 159                    |                                      |                                      |                                         | 11                              |                                                       | 18                                       | 33.3                       | 599.4                                         | 148                                            | 1                         | 148                                          |                     | 747                                          | 373                                |                                   | 140                                     | 148                                            | 1.04                     | 153.40                         | 97.23                          |                    | 116.52                              | 134.11                         | -81.23                           | 52.88                         |
| 32               | 1972 | Ruan Baorong                      | 1               | low-middle-class peasant   | 34                    | 4                      | 2                     | 2                       | 6                              |                           |                           | 6                              | 60                                     | 1125.5                    | 140.7                            | 1266                   |                                      |                                      |                                         | 51                              |                                                       | 60                                       | 33.3                       | 1998                                          | 1215                                           | 1                         | 1215                                         |                     | 3213                                         | 536                                |                                   | 420                                     | 1215                                           | 1.04                     | 1263.81                        |                                |                    | 933.10                              | 330.71                         | 543.80                           | 874.51                        |
| 33               | 1972 | Cao Qiguo                         | 1               | low-middle-class peasant   | 17                    | 2                      | 1                     | 1                       | 7                              | 1                         | 2                         | 4                              | 66                                     | 449.2                     | 94                               | 543                    |                                      |                                      |                                         | 26                              |                                                       | 66                                       | 33.3                       | 2197.8                                        | 517                                            | 1                         | 517                                          | 100                 | 2815                                         | 402                                |                                   | 490                                     | 517                                            | 1.04                     | 537.89                         |                                |                    | 519.63                              | 18.26                          | -112.78                          | -94.52                        |
| 34               | 1972 | Liu Jinliang                      | 1               | poor peasant               | 20                    | 3                      | 1                     | 2                       | 8                              | 1                         |                           | 7                              | 78                                     | 770.8                     | 113.8                            | 885                    |                                      |                                      |                                         | 30                              |                                                       | 78                                       | 33.3                       | 2597.4                                        | 855                                            | 1                         | 855                                          | 20                  | 3472                                         | 434                                |                                   | 560                                     | 855                                            | 1.04                     | 888.78                         |                                |                    | 826.28                              | 62.50                          | 302.61                           | 365.11                        |
| 35               | 1972 | Shi Baoshou                       | 1               | low-middle-class peasant   | 22                    | 3                      | 1                     | 2                       | 7                              |                           | 2                         | 5                              | 68                                     | 444.8                     | 67.8                             | 513                    |                                      |                                      |                                         | 33                              |                                                       | 68                                       | 33.3                       | 2264.4                                        | 480                                            | 1                         | 480                                          |                     | 2744                                         | 392                                |                                   | 490                                     | 480                                            | 1.04                     | 498.78                         |                                |                    | 574.17                              | -75.39                         | -1037.11                         | -1112.50                      |
| 36               | 1972 | Wang Qiding                       | 2               | low-middle-class peasant   | 13                    | 2                      | 1                     | 1                       | 2                              |                           |                           | 2                              | 20                                     | 198.5                     | 30.4                             | 229                    |                                      |                                      |                                         | 20                              |                                                       | 20                                       | 33.3                       | 666                                           | 209                                            | 1                         | 209                                          |                     | 875                                          | 437                                |                                   | 140                                     | 209                                            | 1.02                     | 213.08                         |                                |                    | 217.45                              | -4.37                          | 107.46                           | 103.09                        |
| 37               | 1972 | Yu Zhankui                        | 1               | poor peasant               | 17                    | 2                      | 1                     | 1                       | 5                              | 1                         | 1                         | 3                              | 47                                     |                           | 16                               | 16                     |                                      |                                      |                                         | 26                              |                                                       | 47                                       | 33.3                       | 1565.1                                        | 0                                              | 1                         | 0                                            |                     | 1565                                         | 313                                |                                   | 350                                     | 0                                              | 1.04                     | 0.00                           | 200.00                         | 262.49             | -62.49                              | -264.09                        | -326.58                          |                               |
| 38               | 1972 | Liu Yucan                         | 1               | poor peasant               | 17                    | 2                      | 1                     | 1                       | 6                              | 2                         | 2                         | 2                              | 54                                     | 354.1                     | 116                              | 470                    |                                      |                                      |                                         | 11                              |                                                       | 54                                       | 33.3                       | 1709                                          | 459                                            | 1                         | 459                                          | 234                 | 2402                                         | 400                                |                                   | 420                                     | 459                                            | 1.04                     | 477.46                         |                                |                    | 495.48                              | -18.02                         | -243.28                          | -261.30                       |
| 39               | 1972 | Liu Guiting                       | 1               | middle-class peasant       |                       |                        |                       |                         | 3                              |                           |                           | 3                              | 30                                     | 380.5                     | 117.9                            | 498                    |                                      |                                      |                                         |                                 |                                                       | 30                                       | 33.3                       | 999                                           | 498                                            | 1                         | 498                                          |                     | 1497                                         | 499                                |                                   | 210                                     | 498                                            | 1.04                     | 518.34                         |                                |                    | 405.45                              | 112.89                         | 136.04                           | 248.93                        |
| 40               | 1972 | Liu Chengze                       | 1               | middle-class peasant       |                       |                        |                       |                         | 1                              |                           |                           | 1                              | 10                                     | 155.1                     |                                  | 155                    |                                      |                                      |                                         |                                 |                                                       | 10                                       | 33.3                       | 333                                           | 155                                            | 1                         | 155                                          |                     | 488                                          | 488                                |                                   | 70                                      | 155                                            | 1.04                     | 161.30                         |                                |                    | 133.42                              | 27.88                          | 69.15                            | 97.03                         |
| 41               | 1972 | Li Jinhu                          | 1               | middle-class peasant       | 10                    | 1                      | 1                     | 0                       | 3                              |                           |                           | 3                              | 30                                     | 214.2                     | 67                               | 281                    |                                      |                                      |                                         | 15                              |                                                       | 30                                       | 33.3                       | 999                                           | 266                                            | 1                         | 266                                          |                     | 1265                                         | 422                                |                                   | 210                                     | 266                                            | 1.04                     | 276.85                         | 72.00                          |                    | 314.62                              | 34.23                          | 201.42                           | 235.65                        |
| 42               | 1972 | Meng Xiqing                       | 0               | poor peasant               |                       |                        |                       |                         |                                |                           |                           |                                |                                        |                           |                                  | 0                      |                                      |                                      |                                         |                                 |                                                       | 0                                        | 33.3                       | 0                                             | 0                                              | 1                         | 0                                            |                     | 0                                            | #DIV/0!                            |                                   | 0                                       | 0                                              | 1.04                     | 0.00                           |                                |                    | 0.00                                |                                | 0.00                             |                               |
| 43               | 1972 | Li Shucheng                       | 1               | poor peasant               | 27                    | 3                      | 2                     | 1                       | 7                              |                           | 1                         | 6                              | 69                                     | 758.8                     | 173.6                            | 932                    |                                      |                                      |                                         | 41                              |                                                       | 69                                       | 33.3                       | 2297.7                                        | 891                                            | 1                         | 891                                          |                     | 3189                                         | 456                                |                                   | 490                                     | 891                                            | 1.04                     | 927.06                         |                                |                    | 709.21                              | 217.85                         | 220.40                           | 438.25                        |
| 44               | 1972 | Wang Guiying                      | 1               | low-middle-class peasant   | 24                    | 3                      | 1                     | 2                       | 3                              |                           |                           | 3                              | 30                                     | 361.2                     | 26.6                             | 388                    |                                      |                                      |                                         | 36                              |                                                       | 30                                       | 33.3                       | 999                                           | 352                                            | 1                         | 352                                          |                     | 1351                                         | 450                                |                                   | 210                                     | 352                                            | 1.04                     | 365.87                         |                                |                    | 343.57                              | 22.30                          | 129.90                           | 152.20                        |
| 45               | 1972 | Zuo Yunxian                       | 1               | upper-middle-class peasant | 41                    | 5                      | 2                     | 3                       | 9                              |                           |                           | 9                              | 90                                     | 1257.0                    | 174.5                            | 1432                   |                                      |                                      |                                         | 62                              |                                                       | 90                                       | 33.3                       | 2997                                          | 1370                                           | 1                         | 1370                                         | 20                  | 4387                                         | 487                                |                                   | 630                                     | 1370                                           | 1.04                     | 1424.28                        |                                |                    | 986.24                              | 438.04                         | 434.77                           | 872.81                        |
| 46               | 1972 | Gao Peijie                        | 1               | poor peasant               | 10                    | 1                      | 1                     | 0                       | 2                              |                           |                           | 2                              | 20                                     | 232.6                     |                                  | 233                    |                                      |                                      |                                         | 15                              |                                                       | 20                                       | 33.3                       | 666                                           | 218                                            | 1                         | 218                                          |                     | 884                                          | 442                                |                                   | 140                                     | 218                                            | 1.04                     | 226.30                         |                                |                    | 213.04                              | 13.26                          | 34.31                            | 47.57                         |

DATASET DONGBEILI-SHANXI

(cont.)

| Household number | Year | Name of the head of the household | Production team | Class status (1)         | Basic work points (2) | Total labor forces (3) | Male labor forces (4) | Female labor forces (5) | Total household population (6) | Age: 1 to 3 years old (7) | Age: 4 to 7 years old (8) | Age: 8 years old and above (9) | Work points of grain distribution (10) | Laboring work points (11) | Farmyard manure work points (12) | Total work points (13) | Work points of compulsory labor (14) | Work points of help cultivation (15) | Work points of private plots labor (16) | Total deducted work points (17) | Acutal workdays of participation in distribution (18) | Workpoints for rations distribution (19) | Rations per workpoint (20) | Total rations received form distribution (21) | Workdays of participation in distribu- tion (22) | Grains per workpoint (23) | Total grains distributed by work- points (24) | Grains subsidy (25) | Total Grains received from distribution (26) | Distributed grains per person (27) | Distributed grains per adult (28) | Grains received from privated plots (29) | Workdays of participation in distribution (30) | Value per workpoint (31) | Total value of workpoints (32) | Money used for investment (33) | Sum of income (34) | Money distributed in this year (34) | Deposit/ debt of this year (35) | Deposit/ debt over the years (36) | Accumulated deposit/debt (37) |
|------------------|------|-----------------------------------|-----------------|--------------------------|-----------------------|------------------------|-----------------------|-------------------------|--------------------------------|---------------------------|---------------------------|--------------------------------|----------------------------------------|---------------------------|----------------------------------|------------------------|--------------------------------------|--------------------------------------|-----------------------------------------|---------------------------------|-------------------------------------------------------|------------------------------------------|----------------------------|-----------------------------------------------|--------------------------------------------------|---------------------------|-----------------------------------------------|---------------------|----------------------------------------------|------------------------------------|-----------------------------------|------------------------------------------|------------------------------------------------|--------------------------|--------------------------------|--------------------------------|--------------------|-------------------------------------|---------------------------------|-----------------------------------|-------------------------------|
| 47               | 1972 | Wang Qisheng                      | 1               | poor peasant             | 17                    | 2                      | 1                     | 1                       | 6                              | 1                         | 1                         | 4                              | 57                                     | 286.8                     | 42.5                             | 329                    |                                      |                                      |                                         | 26                              |                                                       | 57                                       | 33.3                       | 1898.1                                        | 303                                              | 1                         | 303                                           | 2201                | 367                                          |                                    | 420                               | 303                                      | 1.04                                           | 315.43                   |                                |                                | 423.94             | -108.51                             | -527.60                         | -636.11                           |                               |
| 48               | 1972 | Chen Yuzhong                      | 2               | poor peasant             | 24                    | 3                      | 1                     | 2                       | 6                              |                           | 1                         | 5                              | 59                                     | 598.2                     | 94                               | 692                    |                                      |                                      |                                         | 36                              |                                                       | 59                                       | 33.3                       | 1964.7                                        | 656                                              | 1                         | 656                                           | 2621                | 437                                          |                                    | 420                               | 656                                      | 1.02                                           | 669.32                   |                                |                                | 520.34             | 148.98                              | -440.04                         | -291.06                           |                               |
| 49               | 1972 | Meng Tianchang                    | 2               | poor peasant             | 17                    | 2                      | 1                     | 1                       | 5                              | 1                         | 2                         | 2                              | 46                                     | 473.7                     | 14.5                             | 488                    |                                      |                                      |                                         | 26                              |                                                       | 46                                       | 33.3                       | 1531.8                                        | 462                                              | 1                         | 462                                           | 1994                | 399                                          |                                    | 350                               | 462                                      | 1.02                                           | 471.44                   |                                |                                | 439.97             | 31.47                               | -159.55                         | -128.08                           |                               |
| 50               | 1972 | Wang Xizhi                        | 2               | middle-class peasant     | 18                    | 3                      | 1                     | 2                       | 6                              |                           |                           | 6                              | 60                                     | 629.7                     | 93.7                             | 723                    |                                      |                                      |                                         | 27                              |                                                       | 60                                       | 33.3                       | 1998                                          | 696                                              | 1                         | 696                                           | 2694                | 449                                          |                                    | 420                               | 346                                      | 1.02                                           | 352.92                   |                                |                                | 622.07             | -269.15                             | -40.59                          | -309.74                           |                               |
| 51               | 1972 | JiaJinkui                         | 2               | low-middle-class peasant |                       |                        |                       |                         | 1                              |                           |                           | 1                              | 10                                     |                           |                                  | 0                      |                                      |                                      |                                         |                                 | 10                                                    | 33.3                                     | 333                        | 0                                             | 1                                                | 0                         | 333                                           | 333                 |                                              | 70                                 | 0                                 | 1.02                                     | 0.00                                           |                          |                                | 67.78                          | -67.78             | -761.67                             | -829.45                         |                                   |                               |
| 52               | 1972 | Ji Yunxian                        | 2               | poor peasant             | 8                     | 1                      | 1                     | 0                       | 1                              |                           |                           | 1                              | 10                                     | 213.1                     |                                  | 213                    |                                      |                                      |                                         | 12                              |                                                       | 10                                       | 33.3                       | 333                                           | 201                                              | 1                         | 201                                           | 534                 | 534                                          |                                    | 70                                | 201                                      | 1.02                                           | 205.12                   |                                |                                | 95.60              | 109.52                              | -103.46                         | 6.06                              |                               |
| 53               | 1972 | Zhang Yumei                       | 1               | poor peasant             | 31                    | 4                      | 1                     | 3                       | 6                              | 1                         |                           | 5                              | 58                                     | 302.6                     | 66.2                             | 369                    |                                      |                                      |                                         | 47                              |                                                       | 58                                       | 33.3                       | 1931.4                                        | 322                                              | 1                         | 322                                           | 2253                | 376                                          |                                    | 420                               | 322                                      | 1.04                                           | 334.67                   | 115.00                         |                                | 350.00             | 99.67                               | -16.23                          | 83.44                             |                               |
| 54               | 1972 | Wang Jishi                        | 1               | middle-class peasant     | 35                    | 5                      | 2                     | 3                       | 5                              |                           |                           | 5                              | 50                                     | 1145.6                    | 54.1                             | 1200                   |                                      |                                      |                                         | 53                              |                                                       | 50                                       | 33.3                       | 1665                                          | 1147                                             | 1                         | 1147                                          | 2812                | 562                                          |                                    | 350                               | 1147                                     | 1.04                                           | 1192.57                  | 31.40                          |                                | 888.37             | 335.60                              | 747.89                          | 1083.49                           |                               |
| 55               | 1972 | Mu Zhaosheng                      | 2               | middle-class peasant     | 17                    | 2                      | 1                     | 1                       | 5                              | 1                         | 1                         | 3                              | 47                                     | 501.2                     | 22                               | 523                    |                                      |                                      |                                         | 26                              |                                                       | 47                                       | 33.3                       | 1565.1                                        | 497                                              | 1                         | 497                                           | 100                 | 432                                          |                                    | 350                               | 497                                      | 1.02                                           | 507.14                   |                                |                                | 387.87             | 119.27                              | -4.80                           | 114.47                            |                               |
| 56               | 1972 | Li Cuilan                         | 2               | middle-class peasant     | 7                     | 1                      | 0                     | 1                       | 3                              |                           | 1                         | 2                              | 29                                     | 115.5                     | 37.6                             | 153                    |                                      |                                      |                                         | 11                              |                                                       | 29                                       | 33.3                       | 965.7                                         | 142                                              | 1                         | 142                                           | 1108                | 369                                          |                                    | 210                               | 142                                      | 1.02                                           | 144.94                   | 80.00                          |                                | 184.76             | 40.18                               | 14.12                           | 54.30                             |                               |
| 57               | 1972 | Ma Shanming                       | 2               | middle-class peasant     | 17                    | 2                      | 1                     | 1                       | 7                              | 1                         |                           | 6                              | 68                                     | 450.5                     | 54.6                             | 505                    |                                      |                                      |                                         | 26                              |                                                       | 68                                       | 33.3                       | 2264.4                                        | 479                                              | 1                         | 479                                           | 2744                | 392                                          |                                    | 490                               | 479                                      | 1.02                                           | 488.68                   |                                |                                | 573.94             | -85.26                              | -827.24                         | -912.50                           |                               |
| 58               | 1972 | Liang Xiulan                      | 2               | middle-class peasant     | 17                    | 2                      | 1                     | 1                       | 4                              |                           |                           | 4                              | 40                                     | 345.3                     | 76.5                             | 422                    |                                      |                                      |                                         | 26                              |                                                       | 40                                       | 33.3                       | 1332                                          | 396                                              | 1                         | 396                                           | 1728                | 432                                          |                                    | 280                               | 396                                      | 1.02                                           | 403.92                   |                                |                                | 313.67             | 90.25                               | 10.90                           | 101.15                            |                               |
| 59               | 1972 | Cui Yongchang                     | 1               | poor peasant             | 15                    | 2                      | 1                     | 1                       | 5                              |                           |                           | 5                              | 50                                     | 412.4                     | 91.7                             | 504                    |                                      |                                      |                                         | 23                              |                                                       | 50                                       | 33.3                       | 1665                                          | 481                                              | 1                         | 481                                           | 2146                | 429                                          |                                    | 350                               | 481                                      | 1.04                                           | 500.34                   | 30.00                          |                                | 401.42             | 128.92                              | -241.22                         | -112.30                           |                               |
| 60               | 1972 | Zhang Hengshou                    | 1               | low-middle-class peasant | 20                    | 3                      | 1                     | 2                       | 7                              | 1                         | 1                         | 5                              | 67                                     | 555.1                     | 73.6                             | 629                    |                                      |                                      |                                         | 30                              |                                                       | 67                                       | 33.3                       | 2231.1                                        | 599                                              | 1                         | 599                                           | 2830                | 404                                          |                                    | 490                               | 599                                      | 1.04                                           | 622.65                   |                                |                                | 562.37             | 60.28                               | -255.73                         | -195.45                           |                               |
| 61               | 1972 | Zhao Yingtong                     | 1               | poor peasant             | 28                    | 4                      | 2                     | 2                       | 6                              | 1                         |                           | 5                              | 58                                     | 720.3                     | 73.7                             | 794                    |                                      |                                      |                                         | 42                              |                                                       | 58                                       | 33.3                       | 1931.4                                        | 752                                              | 1                         | 752                                           | 2683                | 447                                          |                                    | 420                               | 752                                      | 1.04                                           | 782.08                   |                                |                                | 594.17             | 187.91                              | 104.74                          | 292.65                            |                               |
| 62               | 1972 | Wu Xinggui                        | 1               | poor peasant             | 17                    | 2                      | 1                     | 1                       | 4                              | 1                         | 1                         | 2                              | 37                                     | 432.5                     | 40.8                             | 473                    |                                      |                                      |                                         | 26                              |                                                       | 37                                       | 33.3                       | 1232.1                                        | 447                                              | 1                         | 447                                           | 1679                | 420                                          |                                    | 280                               | 447                                      | 1.04                                           | 465.19                   |                                |                                | 422.52             | 42.67                               | -82.31                          | -39.64                            |                               |
| 63               | 1972 | Wang Youfeng                      | 1               | poor peasant             | 3                     | 1                      | 0                     | 1                       | 3                              |                           |                           | 3                              | 30                                     | 134.8                     | 24                               | 159                    |                                      |                                      |                                         | 5                               |                                                       | 30                                       | 33.3                       | 999                                           | 154                                              | 1                         | 154                                           | 1153                | 384                                          |                                    | 210                               | 154                                      | 1.04                                           | 159.95                   |                                |                                | 217.22             | -57.27                              | -122.40                         | -179.67                           |                               |
| 64               | 1972 | Wang Qingsheng                    | 1               | poor peasant             | 10                    | 1                      | 1                     | 0                       | 2                              |                           |                           | 2                              | 20                                     | 338.0                     | 14                               | 352                    |                                      |                                      |                                         | 20                              |                                                       | 20                                       | 33.3                       | 666                                           | 352                                              | 1                         | 352                                           | 1018                | 509                                          |                                    | 140                               | 352                                      | 1.04                                           | 366.08                   |                                |                                | 264.18             | 101.90                              | 193.78                          | 295.68                            |                               |
| 65               | 1972 | Li Yulin                          | 1               | middle-class peasant     | 7                     | 1                      | 0                     | 1                       | 3                              |                           |                           | 3                              | 30                                     | 464.4                     | 34.4                             | 499                    |                                      |                                      |                                         | 11                              |                                                       | 30                                       | 33.3                       | 999                                           | 488                                              | 1                         | 488                                           | 1487                | 496                                          |                                    | 210                               | 488                                      | 1.04                                           | 507.31                   |                                |                                | 417.19             | 90.12                               | 359.66                          | 449.78                            |                               |
| 66               | 1972 | Zuo Chunlan                       | 1               | middle-class peasant     | 7                     | 1                      | 0                     | 1                       | 6                              | 1                         | 1                         | 4                              | 57                                     | 5.2                       | 40.5                             | 46                     |                                      |                                      |                                         | 11                              |                                                       | 57                                       | 33.3                       | 1898.1                                        | 35                                               | 1                         | 35                                            | 1933                | 322                                          |                                    | 420                               | 35                                       | 1.04                                           | 36.09                    | 280.00                         |                                | 319.38             | -3.29                               | -93.32                          | -96.61                            |                               |
| 67               | 1972 | Gao Chongji                       | 1               | poor peasant             | 49                    | 6                      | 3                     | 3                       | 10                             |                           |                           | 10                             | 100                                    | 1337.5                    | 124.1                            | 1462                   |                                      |                                      |                                         | 74                              |                                                       | 100                                      | 33.3                       | 3330                                          | 1388                                             | 1                         | 1388                                          | 4718                | 472                                          |                                    | 700                               | 1388                                     | 1.04                                           | 1079.52                  |                                |                                | 1170.18            | -90.66                              | 600.00                          | 509.34                            |                               |
| 68               | 1972 | Gao Chongwen                      | 1               | poor peasant             | 34                    | 4                      | 2                     | 2                       | 8                              | 1                         | 1                         | 6                              | 77                                     | 801.6                     | 149                              | 951                    |                                      |                                      |                                         | 51                              |                                                       | 77                                       | 33.3                       | 2564.1                                        | 900                                              | 1                         | 900                                           | 3464                | 433                                          |                                    | 560                               | 900                                      | 1.04                                           | 935.58                   |                                |                                | 705.43             | 230.15                              | -781.08                         | -550.93                           |                               |

(cont.)

| Household number | Year | Name of the head of the household | Production team | Class status (1)         | Basic work points (2) | Total labor forces (3) | Male labor forces (4) | Female labor forces (5) | Total household population (6) | Age: 1 to 3 years old (7) | Age: 4 to 7 years old (8) | Age: 8 years old and above (9) | Work points of grain distribution (10) | Laboring work points (11) | Farmyard manure work points (12) | Total work points (13) | Work points of compulsory labor (14) | Work points of help cultivation (15) | Work points of private plots labor (16) | Total deducted work points (17) | Actual workdays of participation in distribution (18) | Workpoints for rations distribution (19) | Rations per workpoint (20) | Total rations received from distribution (21) | Workdays of participation in distribution (22) | Grains per workpoint (23) | Total grains distributed by work-points (24) | Grains subsidy (25) | Total Grains received from distribution (26) | Distributed grains per person (27) | Distributed grains per adult (28) | Grains received from private plots (29) | Workdays of participation in distribution (30) | Value per workpoint (31) | Total value of workpoints (32) | Money used for investment (33) | Sum of income (34) | Money distributed in this year (34) | Deposit/debt of this year (35) | Deposit/debt over the years (36) | Accumulated deposit/debt (37) |         |
|------------------|------|-----------------------------------|-----------------|--------------------------|-----------------------|------------------------|-----------------------|-------------------------|--------------------------------|---------------------------|---------------------------|--------------------------------|----------------------------------------|---------------------------|----------------------------------|------------------------|--------------------------------------|--------------------------------------|-----------------------------------------|---------------------------------|-------------------------------------------------------|------------------------------------------|----------------------------|-----------------------------------------------|------------------------------------------------|---------------------------|----------------------------------------------|---------------------|----------------------------------------------|------------------------------------|-----------------------------------|-----------------------------------------|------------------------------------------------|--------------------------|--------------------------------|--------------------------------|--------------------|-------------------------------------|--------------------------------|----------------------------------|-------------------------------|---------|
| 69               | 1972 | Gao Peiren                        | 1               | poor peasant             | 25                    | 3                      | 2                     | 1                       | 8                              |                           | 1                         | 7                              | 79                                     | 827.3                     | 171.5                            | 999                    |                                      |                                      |                                         | 38                              |                                                       | 79                                       | 33.3                       | 2630.7                                        | 961                                            | 1                         | 961                                          |                     | 3592                                         |                                    | 449                               |                                         | 560                                            | 961                      | 1.04                           | 999.23                         |                    |                                     | 716.60                         | 282.63                           | -366.81                       | -84.18  |
| 70               | 1972 | Wang Jingyi                       | 1               | low-middle-class peasant | 10                    | 2                      | 0                     | 2                       | 2                              |                           |                           | 2                              | 20                                     | 164.6                     | 70.7                             | 235                    |                                      |                                      |                                         | 15                              |                                                       | 20                                       | 33.3                       | 666                                           | 220                                            | 1                         | 220                                          |                     | 886                                          |                                    | 443                               |                                         | 140                                            | 220                      | 1.04                           | 229.11                         |                    |                                     | 430.28                         | -201.17                          | 581.21                        | 380.04  |
| 71               | 1972 | Wang Shutang                      | 1               | low-middle-class peasant | 17                    | 2                      | 1                     | 1                       | 4                              |                           | 2                         | 2                              | 38                                     | 377.2                     | 58.8                             | 436                    |                                      |                                      |                                         | 26                              |                                                       | 38                                       | 33.3                       | 1265.4                                        | 410                                            | 1                         | 410                                          | 20                  | 1695                                         |                                    | 424                               |                                         | 280                                            | 410                      | 1.04                           | 426.40                         |                    |                                     | 367.17                         | 59.23                            | -34.28                        | 24.95   |
| 72               | 1972 | Meng Peizhong                     | 1               | middle-class peasant     |                       |                        |                       |                         | 1                              |                           |                           | 1                              | 10                                     | 332.4                     | 4                                | 336                    |                                      |                                      |                                         |                                 | 10                                                    | 33.3                                     | 333                        | 336                                           | 1                                              | 336                       | 80                                           | 749                 |                                              | 749                                |                                   |                                         | 70                                             | 336                      | 1.04                           | 349.86                         |                    |                                     | 253.01                         | 96.85                            | 287.32                        | 384.17  |
| 73               | 1972 | Meng Peixing                      | 1               | middle-class peasant     | 20                    | 3                      | 1                     | 2                       | 6                              | 1                         |                           | 5                              | 58                                     | 390.8                     | 92.5                             | 483                    |                                      |                                      |                                         | 30                              |                                                       | 58                                       | 33.3                       | 1781                                          | 453                                            | 1                         | 453                                          |                     | 2234                                         |                                    | 372                               |                                         | 420                                            | 453                      | 1.04                           | 471.43                         |                    |                                     | 493.67                         | -22.24                           | 215.05                        | 192.81  |
| 74               | 1972 | Meng Mingbiao                     | 1               | middle-class peasant     | 17                    | 2                      | 1                     | 1                       | 6                              |                           | 2                         | 4                              | 58                                     | 378.7                     | 23.2                             | 402                    |                                      |                                      |                                         | 26                              |                                                       | 58                                       | 33.3                       | 1931.4                                        | 376                                            | 1                         | 376                                          |                     | 2307                                         |                                    | 385                               |                                         | 420                                            | 376                      | 1.04                           | 390.94                         | 31.40              |                                     | 420.20                         | 2.14                             | -226.43                       | -224.29 |
| 75               | 1972 | Xue Yuhua                         | 1               | poor peasant             | 3                     | 1                      | 0                     | 1                       | 3                              |                           |                           | 3                              | 30                                     | 115.2                     | 20.5                             | 136                    |                                      |                                      |                                         | 5                               |                                                       | 30                                       | 33.3                       | 999                                           | 131                                            | 1                         | 131                                          | 72                  | 1202                                         |                                    | 401                               |                                         | 210                                            | 131                      | 1.04                           | 135.93                         |                    |                                     | 228.00                         | -92.07                           | -224.21                       | -316.28 |
| 76               | 1972 | Wang Chuanai                      | 1               | middle-class peasant     | 7                     | 1                      | 0                     | 1                       | 5                              | 1                         | 2                         | 2                              | 46                                     |                           | 39.6                             | 40                     |                                      |                                      |                                         | 11                              |                                                       | 46                                       | 33.3                       | 1531.8                                        | 29                                             | 1                         | 29                                           |                     | 1560                                         |                                    | 312                               |                                         | 350                                            | 29                       | 1.04                           | 29.74                          | 235.00             |                                     | 252.73                         | 12.01                            | -193.78                       | -181.77 |
| 77               | 1972 | Wang Zhenguo                      | 1               | low-middle-class peasant | 11                    | 2                      | 1                     | 1                       | 3                              |                           |                           | 3                              | 30                                     | 419.0                     | 176.1                            | 595                    |                                      |                                      |                                         | 17                              |                                                       | 30                                       | 33.3                       | 999                                           | 578                                            | 1                         | 578                                          |                     | 1577                                         |                                    | 526                               |                                         | 210                                            | 578                      | 1.04                           | 601.22                         |                    |                                     | 476.71                         | 124.51                           | -94.54                        | 29.97   |
| 78               | 1972 | Mu Shouquan                       | 1               | poor peasant             | 3                     | 1                      | 0                     | 1                       | 2                              |                           |                           | 2                              | 20                                     | 344.4                     | 62.8                             | 407                    |                                      |                                      |                                         | 5                               |                                                       | 20                                       | 33.3                       | 666                                           | 402                                            | 1                         | 402                                          |                     | 1068                                         |                                    | 534                               |                                         | 140                                            | 402                      | 1.04                           | 418.29                         |                    |                                     | 306.82                         | 111.47                           | 258.35                        | 369.82  |
| 79               | 1972 | Mu Zhaozheng                      | 1               | poor peasant             | 17                    | 2                      | 1                     | 1                       | 5                              | 1                         | 1                         | 3                              | 47                                     | 584.9                     | 181.1                            | 766                    |                                      |                                      |                                         | 26                              |                                                       | 47                                       | 33.3                       | 1565.1                                        | 740                                            | 1                         | 740                                          | 20                  | 2325                                         |                                    | 465                               |                                         | 350                                            | 740                      | 1.04                           | 769.60                         |                    |                                     | 489.25                         | 280.35                           | 166.37                        | 446.72  |
| 80               | 1972 | Ma Likui                          | 1               | poor peasant             | 18                    | 2                      | 2                     | 0                       | 4                              |                           |                           | 4                              | 40                                     | 578.7                     | 78.1                             | 657                    |                                      |                                      |                                         | 27                              |                                                       | 40                                       | 33.3                       | 1443                                          | 630                                            | 1                         | 630                                          |                     | 2073                                         |                                    | 518                               |                                         | 280                                            | 630                      | 1.04                           | 654.99                         |                    |                                     | 558.88                         | 96.11                            | 751.84                        | 847.95  |
| 81               | 1972 | Ma Xiulan                         | 1               | middle-class peasant     | 7                     | 1                      | 0                     | 1                       | 6                              | 2                         | 1                         | 3                              | 55                                     | 51.7                      | 7                                | 59                     |                                      |                                      |                                         | 11                              |                                                       | 55                                       | 33.3                       | 1765                                          | 48                                             | 1                         | 48                                           |                     | 1813                                         |                                    | 302                               |                                         | 420                                            | 48                       | 1.04                           | 49.61                          | 192.00             |                                     | 255.42                         | -13.81                           | 38.47                         | 24.66   |
| 82               | 1972 | Wang Dianjie                      | 1               | middle-class peasant     | 27                    | 3                      | 2                     | 1                       | 8                              | 1                         | 2                         | 5                              | 76                                     | 779.5                     | 72.3                             | 852                    |                                      |                                      |                                         | 41                              |                                                       | 76                                       | 33.3                       | 2530.8                                        | 811                                            | 1                         | 811                                          |                     | 3342                                         |                                    | 418                               |                                         | 560                                            | 811                      | 1.04                           | 843.23                         |                    |                                     | 616.00                         | 227.23                           | -148.47                       | 78.76   |
| 83               | 1972 | Wang Litang                       | 1               | low-middle-class peasant | 33                    | 4                      | 3                     | 1                       | 9                              | 2                         | 1                         | 6                              | 85                                     | 979.7                     | 77.1                             | 1057                   |                                      |                                      |                                         | 50                              |                                                       | 85                                       | 33.3                       | 2720                                          | 1007                                           | 1                         | 1007                                         |                     | 3727                                         |                                    | 414                               |                                         | 630                                            | 1007                     | 1.04                           | 1047.07                        |                    |                                     | 766.97                         | 280.10                           | -17.48                        | 262.62  |
| 84               | 1972 | Wei Zhaoliang                     | 1               | low-middle-class peasant | 15                    | 2                      | 1                     | 1                       | 4                              |                           |                           | 4                              | 40                                     | 462.6                     | 61.4                             | 524                    |                                      |                                      |                                         | 23                              |                                                       | 40                                       | 33.3                       | 1332                                          | 501                                            | 1                         | 501                                          |                     | 1833                                         |                                    | 458                               |                                         | 280                                            | 501                      | 1.04                           | 521.04                         |                    |                                     | 401.63                         | 119.41                           | 97.13                         | 216.54  |
| 85               | 1972 | Yang Zhongwen                     | 1               | middle-class peasant     |                       |                        |                       |                         | 2                              |                           |                           | 2                              | 20                                     |                           | 42.1                             | 42                     |                                      |                                      |                                         |                                 | 20                                                    | 33.3                                     | 666                        | 42                                            | 1                                              | 42                        |                                              | 708                 |                                              | 354                                |                                   | 140                                     | 42                                             | 1.04                     | 43.78                          |                                |                    | 162.99                              | -119.21                        | -533.72                          | -652.93                       |         |
| 86               | 1972 | Zhu Guangchang                    | 2               | middle-class peasant     | 25                    | 3                      | 2                     | 1                       | 4                              |                           |                           | 4                              | 40                                     | 641.7                     | 115.8                            | 758                    |                                      |                                      |                                         | 38                              |                                                       | 40                                       | 33.3                       | 1332                                          | 720                                            | 1                         | 720                                          | 30                  | 2082                                         |                                    | 520                               |                                         | 280                                            | 720                      | 1.02                           | 733.89                         |                    |                                     | 611.18                         | 122.71                           | 237.72                        | 360.43  |

(cont.)

| Household number | Year | Name of the head of the household | Production team | Class status (1)         | Basic work points (2) | Total labor forces (3) | Male labor forces (4) | Female labor forces (5) | Total household population (6) | Age: 1 to 3 years old (7) | Age: 4 to 7 years old (8) | Age: 8 years old and above (9) | Work points of grain distribution (10) | Laboring work points (11) | Farmyard manure work points (12) | Total work points (13) | Work points of compulsory labor (14) | Work points of help cultivation (15) | Work points of private plots labor (16) | Total deducted work points (17) | Acutal workdays of participation in distribution (18) | Workpoints for rations distribution (19) | Rations per workpoint (20) | Total rations received form distribution (21) | Workdays of participation in distribu-tion (22) | Grains per workpoint (23) | Total grains distributed by work-points (24) | Grains subsidy (25) | Total Grains received from distribution (26) | Distributed grains per person (27) | Distributed grains per adult (28) | Grains received from privated plots (29) | Workdays of participation in distribution (30) | Value per workpoint (31) | Total value of workpoints (32) | Money used for investment (33) | Sum of income (34) | Money distributed in this year (34) | Deposit/ debt of this year (35) | Deposit/ debt over the years (36) | Accumulated deposit/debt (37) |
|------------------|------|-----------------------------------|-----------------|--------------------------|-----------------------|------------------------|-----------------------|-------------------------|--------------------------------|---------------------------|---------------------------|--------------------------------|----------------------------------------|---------------------------|----------------------------------|------------------------|--------------------------------------|--------------------------------------|-----------------------------------------|---------------------------------|-------------------------------------------------------|------------------------------------------|----------------------------|-----------------------------------------------|-------------------------------------------------|---------------------------|----------------------------------------------|---------------------|----------------------------------------------|------------------------------------|-----------------------------------|------------------------------------------|------------------------------------------------|--------------------------|--------------------------------|--------------------------------|--------------------|-------------------------------------|---------------------------------|-----------------------------------|-------------------------------|
| 87               | 1972 | Yang Yugui                        | 1               | middle-class peasant     | 10                    | 1                      | 1                     | 0                       | 3                              |                           |                           | 3                              | 30                                     | 335.1                     | 54.1                             | 389                    |                                      |                                      |                                         | 15                              |                                                       | 30                                       | 33.3                       | 999                                           | 374                                             | 1                         | 374                                          |                     | 1373                                         | 458                                |                                   | 210                                      | 374                                            | 1.04                     | 389.17                         | 4.00                           | 319.39             | 73.78                               | -106.80                         | -33.02                            |                               |
| 88               | 1972 | Yang Yingzhou                     | 2               | middle-class peasant     | 17                    | 2                      | 1                     | 1                       | 3                              |                           |                           | 3                              | 30                                     | 442.5                     | 71.5                             | 514                    |                                      |                                      |                                         | 26                              |                                                       | 30                                       | 33.3                       | 999                                           | 488                                             | 1                         | 488                                          | 150                 | 1637                                         | 546                                |                                   | 210                                      | 488                                            | 1.02                     | 497.76                         |                                | 405.63             | 92.13                               | 108.94                          | 201.07                            |                               |
| 89               | 1972 | Li Kailiang                       | 1               | poor peasant             |                       |                        |                       |                         | 2                              |                           |                           | 2                              | 20                                     | 258.2                     | 6                                | 264                    |                                      |                                      |                                         |                                 |                                                       | 20                                       | 33.3                       | 666                                           | 264                                             | 1                         | 264                                          |                     | 930                                          | 465                                |                                   | 140                                      | 264                                            | 1.04                     | 274.77                         |                                | 235.42             | 39.35                               | 135.70                          | 175.05                            |                               |
| 90               | 1972 | Li Kaigong                        | 1               | poor peasant             | 6                     | 2                      | 0                     | 2                       | 3                              |                           |                           | 3                              | 30                                     | 551.8                     | 60.2                             | 612                    |                                      |                                      |                                         | 9                               |                                                       | 30                                       | 33.3                       | 999                                           | 603                                             | 1                         | 603                                          |                     | 1602                                         | 534                                |                                   | 210                                      | 603                                            | 1.04                     | 627.12                         |                                | 422.15             | 204.97                              | 232.07                          | 437.04                            |                               |
| 91               | 1972 | Meng Jingcan                      | 1               | poor peasant             | 7                     | 1                      | 0                     | 1                       | 5                              |                           | 1                         | 4                              | 49                                     | 206.6                     | 57.2                             | 264                    |                                      |                                      |                                         | 11                              |                                                       | 49                                       | 33.3                       | 1631.7                                        | 253                                             | 1                         | 253                                          |                     | 1885                                         | 377                                |                                   | 350                                      | 253                                            | 1.04                     | 262.91                         | 114.00                         | 300.49             | 76.42                               | 8.50                            | 84.92                             |                               |
| 92               | 1972 | Fu Lidong                         | 1               | middle-class peasant     |                       |                        |                       |                         | 1                              |                           |                           | 1                              | 10                                     | 127.4                     | 41.4                             | 169                    |                                      |                                      |                                         |                                 |                                                       | 10                                       | 33.3                       | 333                                           | 169                                             | 1                         | 169                                          |                     | 502                                          | 502                                |                                   | 70                                       | 169                                            | 1.04                     | 175.76                         |                                | 119.98             | 55.78                               | 33.48                           | 89.26                             |                               |
| 93               | 1972 | Meng Peicheng                     | 1               | middle-class peasant     | 17                    | 2                      | 1                     | 1                       | 8                              | 2                         | 2                         | 4                              | 74                                     | 548.0                     | 67.8                             | 616                    |                                      |                                      |                                         | 26                              |                                                       | 74                                       | 33.3                       | 2442                                          | 590                                             | 1                         | 590                                          | 30                  | 3062                                         | 383                                |                                   | 560                                      | 590                                            | 1.04                     | 613.39                         |                                | 671.31             | -57.92                              | -708.70                         | -766.62                           |                               |
| 94               | 1972 | Mu Shouwen                        | 1               | middle-class peasant     | 17                    | 2                      | 1                     | 1                       | 7                              | 1                         | 2                         | 4                              | 66                                     | 565.1                     | 108.6                            | 674                    |                                      |                                      |                                         | 26                              |                                                       | 66                                       | 33.3                       | 2197.8                                        | 648                                             | 1                         | 648                                          |                     | 2846                                         | 407                                |                                   | 490                                      | 648                                            | 1.04                     | 673.61                         |                                | 541.08             | 132.53                              | -2.37                           | 130.16                            |                               |
| 95               | 1972 | Mu Zhaorui                        | 1               | middle-class peasant     | 17                    | 2                      | 1                     | 1                       | 2                              |                           |                           | 2                              | 20                                     | 510.4                     | 32.6                             | 543                    |                                      |                                      |                                         | 26                              |                                                       | 20                                       | 33.3                       | 666                                           | 517                                             | 1                         | 517                                          | 20                  | 1203                                         | 602                                |                                   | 140                                      | 517                                            | 1.04                     | 537.68                         |                                | 356.83             | 180.85                              | 303.01                          | 483.86                            |                               |
| 96               | 1972 | Zhang Lirong                      | 1               | middle-class peasant     | 17                    | 2                      | 1                     | 1                       | 5                              | 1                         | 1                         | 3                              | 47                                     | 595.6                     | 91.4                             | 687                    |                                      |                                      |                                         | 26                              |                                                       | 47                                       | 33.3                       | 1454                                          | 661                                             | 1                         | 661                                          |                     | 2115                                         | 423                                |                                   | 350                                      | 661                                            | 1.04                     | 687.44                         |                                | 502.06             | 185.38                              | 313.12                          | 498.50                            |                               |
| 97               | 1972 | Cui Yongfu                        | 1               | poor peasant             | 17                    | 2                      | 1                     | 1                       | 5                              |                           |                           | 5                              | 50                                     | 818.3                     | 98.7                             | 917                    |                                      |                                      |                                         | 26                              |                                                       | 50                                       | 33.3                       | 1665                                          | 891                                             | 1                         | 891                                          |                     | 2556                                         | 511                                |                                   | 350                                      | 541                                            | 1.04                     | 562.64                         |                                | 706.55             | -143.91                             | 351.99                          | 208.08                            |                               |
| 98               | 1972 | Meng Lanying                      | 1               | poor peasant             |                       |                        |                       |                         | 1                              |                           |                           | 1                              | 10                                     |                           |                                  | 0                      |                                      |                                      |                                         |                                 |                                                       | 10                                       | 33.3                       | 333                                           | 0                                               | 1                         | 0                                            |                     | 333                                          | 333                                |                                   | 70                                       | 0                                              | 1.04                     | 0.00                           |                                | 53.88              | -53.88                              | -376.42                         | -430.30                           |                               |
| 99               | 1972 | Cui Yiren                         | 1               | poor peasant             | 17                    | 2                      | 1                     | 1                       | 5                              | 2                         | 1                         | 2                              | 45                                     | 373.8                     | 40.4                             | 414                    |                                      |                                      |                                         | 26                              |                                                       | 45                                       | 33.3                       | 1432                                          | 388                                             | 1                         | 388                                          |                     | 1820                                         | 364                                |                                   | 350                                      | 388                                            | 1.04                     | 403.73                         |                                | 352.06             | 51.67                               | -8.09                           | 43.58                             |                               |
| 100              | 1972 | Wang Qingde                       | 1               | low-middle-class peasant | 8                     | 1                      | 1                     | 0                       | 1                              |                           |                           | 1                              | 10                                     | 358.5                     |                                  | 359                    |                                      |                                      |                                         | 12                              |                                                       | 10                                       | 33.3                       | 333                                           | 347                                             | 1                         | 347                                          |                     | 680                                          | 680                                |                                   | 70                                       | 347                                            | 1.04                     | 360.36                         |                                | 262.03             | 98.33                               | 380.17                          | 478.50                            |                               |
| 101              | 1972 | Jin Lianyu                        | 1               | poor peasant             |                       |                        |                       |                         | 1                              |                           |                           | 1                              | 10                                     |                           |                                  | 0                      |                                      |                                      |                                         |                                 |                                                       | 10                                       | 33.3                       | 333                                           | 0                                               | 1                         | 0                                            | 67                  | 400                                          | 400                                |                                   | 70                                       | 0                                              | 1.04                     | 0.00                           |                                | 96.64              | -96.64                              | -923.55                         | -1020.19                          |                               |
| 102              | 1972 | Wang Qiyi                         | 1               | poor peasant             | 25                    | 3                      | 2                     | 1                       | 4                              | 1                         |                           | 3                              | 38                                     | 322.8                     | 2.4                              | 325                    |                                      |                                      |                                         | 38                              |                                                       | 38                                       | 33.3                       | 1265.4                                        | 287                                             | 1                         | 287                                          |                     | 1552                                         | 388                                |                                   | 280                                      | 337                                            | 1.04                     | 350.48                         |                                | 392.78             | -42.30                              | 152.21                          | 109.91                            |                               |
| 103              | 1972 | Yang Chengye                      | 1               | poor peasant             |                       |                        |                       |                         | 1                              |                           |                           | 1                              | 10                                     | 108.6                     | 0                                | 109                    |                                      |                                      |                                         | 0                               |                                                       | 10                                       | 33.3                       | 333                                           | 109                                             | 1                         | 109                                          |                     | 442                                          | 442                                |                                   | 70                                       | 109                                            | 1.04                     | 112.94                         |                                | 100.61             | 12.33                               | 93.28                           | 105.61                            |                               |
| 104              | 1972 | Meng Mingjian                     | 1               | poor peasant             | 8                     | 1                      | 1                     | 0                       | 3                              |                           |                           | 3                              | 30                                     | 318.9                     | 68                               | 387                    |                                      |                                      |                                         | 12                              |                                                       | 30                                       | 33.3                       | 999                                           | 375                                             | 1                         | 375                                          |                     | 1374                                         | 458                                |                                   | 210                                      | 375                                            | 1.04                     | 389.90                         |                                | 363.76             | 26.14                               | 36.09                           | 62.23                             |                               |
| 105              | 1972 | Guo Yuexiang                      | 1               | poor peasant             | 7                     | 1                      | 0                     | 1                       | 6                              | 1                         | 1                         | 4                              | 57                                     | 121.                      | 148.6                            | 270                    |                                      |                                      |                                         | 11                              |                                                       | 57                                       | 33.3                       | 1898.1                                        | 259                                             | 1                         | 259                                          |                     | 2157                                         | 360                                |                                   | 420                                      | 259                                            | 1.04                     | 269.46                         | 60.00                          | 346.32             | -16.86                              | 22.82                           | 5.96                              |                               |
| 106              | 1972 | Wu Congchao                       | 2               | poor peasant             | 24                    | 3                      | 1                     | 2                       | 7                              | 1                         | 1                         | 5                              | 67                                     | 545.0                     | 109                              | 563                    |                                      |                                      |                                         | 36                              |                                                       | 67                                       | 33.3                       | 2231.1                                        | 512                                             | 1                         | 512                                          |                     | 2743                                         | 392                                |                                   | 490                                      | 512                                            | 1.02                     | 522.24                         | 30.00                          | 523.09             | 29.15                               | -427.01                         | -397.86                           |                               |
| 107              | 1972 | Xie Yuzhen                        | 0               | poor peasant             |                       |                        |                       |                         |                                |                           |                           |                                |                                        |                           |                                  | 0                      |                                      |                                      |                                         |                                 | 0                                                     | 33.3                                     | 0                          | 0                                             | 1                                               | 0                         |                                              | 0                   | #DIV/0!                                      | 0                                  | 0                                 | 1.04                                     | 0.00                                           |                          | 0.00                           |                                | 0.00               |                                     | 0.00                            |                                   |                               |
| 108              | 1972 | Wu Songlin                        | 1               | poor peasant             |                       |                        |                       |                         | 2                              |                           |                           | 2                              | 20                                     | 1.4                       | 41.5                             | 43                     |                                      |                                      |                                         |                                 |                                                       | 20                                       | 33.3                       | 666                                           | 43                                              | 1                         | 43                                           |                     | 709                                          | 354                                |                                   | 140                                      | 43                                             | 1.04                     | 44.62                          |                                | 157.99             | -113.37                             | -859.78                         | -973.15                           |                               |
| 109              | 1972 | Yang Chunmei                      | 2               | poor peasant             | 17                    | 2                      | 1                     | 1                       | 5                              |                           | 1                         | 4                              | 49                                     | 495.6                     | 98.7                             | 594                    |                                      |                                      |                                         | 26                              |                                                       | 49                                       | 33.3                       | 1715                                          | 568                                             | 1                         | 568                                          |                     | 2283                                         | 457                                |                                   | 350                                      | 568                                            | 1.02                     | 579.67                         |                                | 509.45             | 70.22                               | -783.51                         | -713.29                           |                               |
| 110              | 1972 | Wu Yulan                          | 2               | poor peasant             | 7                     | 1                      | 0                     | 1                       | 5                              | 1                         | 1                         | 3                              | 47                                     | 169.5                     | 51.8                             | 221                    |                                      |                                      |                                         | 11                              |                                                       | 47                                       | 33.3                       | 1565.1                                        | 210                                             | 1                         | 210                                          |                     | 1775                                         | 355                                |                                   | 350                                      | 210                                            | 1.02                     | 214.51                         |                                | 302.24             | -87.73                              | 80.88                           | -6.85                             |                               |



(cont.)

| Household number | Year | Name of the head of the household | Production team | Class status (1)         | Basic work points (2) | Total labor forces (3) | Male labor forces (4) | Female labor forces (5) | Total household population (6) | Age: 1 to 3 years old (7) | Age: 4 to 7 years old (8) | Age: 8 years old and above (9) | Work points of grain distribution (10) | Laboring work points (11) | Farmyard manure work points (12) | Total work points (13) | Work points of compulsory labor (14) | Work points of help cultivation (15) | Work points of private plots labor (16) | Total deducted work points (17) | Actual workdays of participation in distribution (18) | Workpoints for rations distribution (19) | Rations per workpoint (20) | Total rations received from distribution (21) | Workdays of participation in distribution (22) | Grains per workpoint (23) | Total grains distributed by work-points (24) | Grains subsidy (25) | Total Grains received from distribution (26) | Distributed grains per person (27) | Distributed grains per adult (28) | Grains received from private plots (29) | Workdays of participation in distribution (30) | Value per workpoint (31) | Total value of workpoints (32) | Money used for investment (33) | Sum of income (34) | Money distributed in this year (34) | Deposit/debt of this year (35) | Deposit/debt over the years (36) | Accumulated deposit/debt (37) |
|------------------|------|-----------------------------------|-----------------|--------------------------|-----------------------|------------------------|-----------------------|-------------------------|--------------------------------|---------------------------|---------------------------|--------------------------------|----------------------------------------|---------------------------|----------------------------------|------------------------|--------------------------------------|--------------------------------------|-----------------------------------------|---------------------------------|-------------------------------------------------------|------------------------------------------|----------------------------|-----------------------------------------------|------------------------------------------------|---------------------------|----------------------------------------------|---------------------|----------------------------------------------|------------------------------------|-----------------------------------|-----------------------------------------|------------------------------------------------|--------------------------|--------------------------------|--------------------------------|--------------------|-------------------------------------|--------------------------------|----------------------------------|-------------------------------|
| 111              | 1972 | Hua Suzhen                        | 1               | poor peasant             | 10                    | 2                      | 0                     | 2                       | 2                              |                           |                           | 2                              | 20                                     | 319.7                     | 20                               | 340                    |                                      |                                      |                                         | 15                              |                                                       | 20                                       | 33.3                       | 666                                           | 325                                            | 1                         | 325                                          |                     | 991                                          | 495                                |                                   | 140                                     | 325                                            | 1.04                     | 337.69                         |                                | 199.76             | 137.93                              | 47.05                          | 184.98                           |                               |
| 112              | 1972 | Song Liangxiang                   | 1               | poor peasant             | 7                     | 1                      | 0                     | 1                       | 1                              |                           |                           | 1                              | 10                                     | 175.7                     | 10                               | 186                    |                                      |                                      |                                         | 11                              |                                                       | 10                                       | 33.3                       | 333                                           | 175                                            | 1                         | 175                                          |                     | 508                                          | 508                                |                                   | 70                                      | 175                                            | 1.04                     | 181.69                         |                                | 83.68              | 98.01                               | 21.71                          | 119.72                           |                               |
| 113              | 1972 | Zhang Dongde                      | 1               | poor peasant             |                       |                        |                       |                         | 3                              |                           |                           | 3                              | 30                                     | 250.7                     | 105.1                            | 356                    |                                      |                                      |                                         |                                 |                                                       | 30                                       | 33.3                       | 999                                           | 356                                            | 1                         | 356                                          |                     | 1355                                         | 452                                |                                   | 210                                     | 356                                            | 1.04                     | 370.03                         |                                | 276.07             | 93.96                               | 33.12                          | 127.08                           |                               |
| 114              | 1972 | Zhang Zhenyuan                    | 2               | poor peasant             | 17                    | 2                      | 1                     | 1                       | 4                              | 1                         | 1                         | 2                              | 37                                     | 494.6                     |                                  | 495                    |                                      |                                      |                                         | 26                              |                                                       | 37                                       | 33.3                       | 1232.1                                        | 469                                            | 1                         | 469                                          | 100                 | 1801                                         | 450                                |                                   | 280                                     | 469                                            | 1.02                     | 477.97                         |                                | 367.47             | 110.50                              | 41.40                          | 151.90                           |                               |
| 115              | 1972 | Meng Qingyun                      | 2               | poor peasant             | 8                     | 1                      | 1                     | 0                       | 1                              |                           |                           | 1                              | 10                                     | 367.5                     | 4                                | 372                    |                                      |                                      |                                         | 12                              |                                                       | 10                                       | 33.3                       | 333                                           | 360                                            | 1                         | 360                                          |                     | 693                                          | 693                                |                                   | 70                                      | 360                                            | 1.02                     | 366.69                         |                                | 230.18             | 136.51                              | 299.10                         | 435.61                           |                               |
| 116              | 1972 | Zhao Hongsheng                    | 1               | low-middle-class peasant | 34                    | 4                      | 2                     | 2                       | 7                              |                           |                           | 7                              | 70                                     | 657.4                     | 114.5                            | 772                    |                                      |                                      |                                         | 51                              |                                                       | 70                                       | 33.3                       | 2248                                          | 721                                            | 1                         | 721                                          | 20                  | 2989                                         | 427                                |                                   | 490                                     | 721                                            | 1.04                     | 749.74                         |                                | 692.68             | 57.06                               | 13.02                          | 70.08                            |                               |
| 117              | 1972 | Mneg Mingyou                      | 2               | poor peasant             | 10                    | 1                      | 1                     | 0                       | 1                              |                           |                           | 1                              | 10                                     | 304.4                     | 27                               | 331                    |                                      |                                      |                                         | 15                              |                                                       | 10                                       | 33.3                       | 333                                           | 316                                            | 1                         | 316                                          |                     | 649                                          | 649                                |                                   | 70                                      | 316                                            | 1.02                     | 322.73                         |                                | 243.12             | 79.61                               | 308.25                         | 387.86                           |                               |
| 118              | 1972 | Xu Peishi                         | 1               | poor peasant             | 24                    | 4                      | 2                     | 2                       | 6                              |                           |                           | 6                              | 60                                     | 534.0                     | 106.5                            | 641                    |                                      |                                      |                                         | 36                              |                                                       | 60                                       | 33.3                       | 1998                                          | 605                                            | 1                         | 605                                          |                     | 2603                                         | 434                                |                                   | 420                                     | 605                                            | 1.04                     | 628.68                         |                                | 533.18             | 95.50                               | -868.87                        | -773.37                          |                               |
| 119              | 1972 | Wang Qingchang                    | 1               | poor peasant             | 17                    | 2                      | 1                     | 1                       | 4                              |                           | 1                         | 3                              | 39                                     | 622.8                     | 149.5                            | 772                    |                                      |                                      |                                         | 26                              |                                                       | 39                                       | 33.3                       | 1298.7                                        | 746                                            | 1                         | 746                                          |                     | 2045                                         | 511                                |                                   | 280                                     | 746                                            | 1.04                     | 776.15                         |                                | 515.74             | 260.41                              | 172.45                         | 432.86                           |                               |
| 120              | 1972 | Wang Qinghai                      | 2               | poor peasant             | 17                    | 2                      | 1                     | 1                       | 10                             | 1                         | 2                         | 7                              | 96                                     | 565.9                     | 85.9                             | 652                    |                                      |                                      |                                         | 26                              |                                                       | 96                                       | 33.3                       | 3196.8                                        | 626                                            | 1                         | 626                                          | 230                 | 4053                                         | 405                                |                                   | 700                                     | 626                                            | 1.02                     | 638.32                         |                                | 749.26             | -110.94                             | -652.25                        | -763.19                          |                               |
| 121              | 1972 | Cao Desheng                       | 2               | poor peasant             | 8                     | 1                      | 1                     | 0                       | 1                              |                           |                           | 1                              | 10                                     | 252.0                     |                                  | 252                    |                                      |                                      |                                         | 12                              |                                                       | 10                                       | 33.3                       | 333                                           | 240                                            | 1                         | 240                                          |                     | 573                                          | 573                                |                                   | 70                                      | 240                                            | 1.02                     | 244.80                         | 35.00                          | 152.76             | 127.04                              | -110.40                        | 16.64                            |                               |
| 122              | 1972 | Ma Yuying                         | 2               | poor peasant             |                       |                        |                       |                         | 2                              |                           |                           | 2                              | 20                                     |                           | 20                               | 20                     |                                      |                                      |                                         |                                 | 20                                                    | 33.3                                     | 666                        | 20                                            | 1                                              | 20                        |                                              | 686                 | 343                                          |                                    | 140                               | 20                                      | 1.02                                           | 20.40                    | 90.00                          | 111.31                         | -0.91              | -232.80                             | -233.71                        |                                  |                               |
| 123              | 1972 | Liu Peizhen                       | 2               | poor peasant             |                       |                        |                       |                         | 1                              |                           |                           | 1                              | 10                                     |                           | 7.5                              | 8                      |                                      |                                      |                                         |                                 | 10                                                    | 33.3                                     | 333                        | 8                                             | 1                                              | 8                         |                                              | 341                 | 341                                          |                                    | 70                                | 8                                       | 1.02                                           | 7.65                     |                                | 78.00                          | -70.35             | -415.83                             | -486.18                        |                                  |                               |
| 124              | 1972 | Liu Dahai                         | 2               | middle-class peasant     | 20                    | 3                      | 1                     | 2                       | 4                              | 1                         |                           | 3                              | 38                                     | 510.3                     | 90                               | 600                    |                                      |                                      |                                         |                                 |                                                       | 38                                       | 33.3                       | 1265.4                                        | 571                                            | 1                         | 571                                          | 20                  | 1856                                         | 464                                |                                   | 280                                     | 571                                            | 1.02                     | 582.42                         |                                | 488.88             | 93.54                               | 316.03                         | 409.57                           |                               |
| 125              | 1972 | Liu Ercan                         | 2               | middle-class peasant     |                       |                        |                       |                         | 2                              |                           |                           | 2                              | 20                                     |                           | 8                                | 8                      |                                      |                                      |                                         |                                 | 20                                                    | 33.3                                     | 666                        | 8                                             | 1                                              | 8                         |                                              | 674                 | 337                                          |                                    | 140                               | 8                                       | 1.02                                           | 8.16                     |                                | 143.33                         | -135.17            | -640.13                             | -775.30                        |                                  |                               |
| 126              | 1972 | Wu Jingxiang                      | 1               | low-middle-class peasant | 7                     | 1                      | 0                     | 1                       | 2                              | 1                         |                           | 1                              | 18                                     | 13.1                      |                                  | 13                     |                                      |                                      |                                         | 11                              |                                                       | 18                                       | 33.3                       | 599.4                                         | 2                                              | 1                         | 2                                            |                     | 602                                          | 301                                |                                   | 140                                     | 2                                              | 1.04                     | 2.18                           |                                | 57.46              | -55.28                              |                                | -55.28                           |                               |
| 127              | 1972 | Zhang Hengde                      | 2               | poor peasant             | 20                    | 3                      | 1                     | 2                       | 7                              |                           |                           | 7                              | 70                                     | 862.6                     | 162.4                            | 1025                   |                                      |                                      |                                         | 30                              |                                                       | 70                                       | 33.3                       | 2331                                          | 995                                            | 1                         | 995                                          | 100                 | 3426                                         | 489                                |                                   | 490                                     | 995                                            | 1.02                     | 1014.90                        |                                | 929.10             | 85.80                               | 711.62                         | 797.42                           |                               |
| 128              | 1972 | Zhang Hengde                      | 2               | poor peasant             | 8                     | 1                      | 1                     | 0                       | 1                              |                           |                           | 1                              | 10                                     | 276.5                     | 12.5                             | 289                    |                                      |                                      |                                         | 12                              |                                                       | 10                                       | 33.3                       | 333                                           | 277                                            | 1                         | 277                                          |                     | 610                                          | 610                                |                                   | 70                                      | 277                                            | 1.02                     | 282.54                         |                                | 229.05             | 53.49                               | 238.94                         | 292.43                           |                               |
| 129              | 1972 | Wei Zhaoxiang                     | 2               | low-middle-class peasant | 10                    | 1                      | 1                     | 0                       | 3                              |                           |                           | 3                              | 30                                     | 531.9                     |                                  | 532                    |                                      |                                      |                                         | 15                              |                                                       | 30                                       | 33.3                       | 999                                           | 517                                            | 1                         | 517                                          | 20                  | 1536                                         | 512                                |                                   | 210                                     | 517                                            | 1.02                     | 527.24                         |                                | 446.37             | 80.87                               | 276.42                         | 357.29                           |                               |
| 130              | 1972 | Mu Zhaoren                        | 2               | poor peasant             | 17                    | 2                      | 1                     | 1                       | 7                              | 1                         | 1                         | 5                              | 67                                     | 492.3                     | 104                              | 596                    |                                      |                                      |                                         | 26                              |                                                       | 67                                       | 33.3                       | 2231.1                                        | 570                                            | 1                         | 570                                          | 100                 | 2901                                         | 414                                |                                   | 490                                     | 570                                            | 1.02                     | 581.71                         |                                | 602.55             | -20.84                              | -397.53                        | -418.37                          |                               |
| 131              | 1972 | Li Shiyong                        | 2               | poor peasant             |                       |                        |                       |                         | 2                              |                           |                           | 2                              | 20                                     | 247.6                     |                                  | 248                    |                                      |                                      |                                         |                                 | 20                                                    | 33.3                                     | 666                        | 248                                           | 1                                              | 248                       |                                              | 914                 | 457                                          |                                    | 140                               | 248                                     | 1.02                                           | 252.55                   |                                | 176.83                         | 75.72              | 14.56                               | 90.28                          |                                  |                               |
| 132              | 1972 | Wu Jinggui                        | 1               | low-middle-class peasant | 35                    | 5                      | 2                     | 3                       | 8                              |                           |                           | 8                              | 80                                     | 1191.7                    | 202                              | 1394                   |                                      |                                      |                                         | 53                              |                                                       | 80                                       | 33.3                       | 2644                                          | 1341                                           | 1                         | 1341                                         | 150                 | 4135                                         | 517                                |                                   | 560                                     | 1341                                           | 1.04                     | 1394.33                        |                                | 993.46             | 400.87                              | 325.81                         | 726.68                           |                               |
| 133              | 1972 | Wu Jingfang                       | 2               | middle-class peasant     | 17                    | 2                      | 1                     | 1                       | 8                              | 2                         | 1                         | 5                              | 75                                     | 240.1                     | 80.9                             | 321                    |                                      |                                      |                                         | 26                              |                                                       | 75                                       | 33.3                       | 2497.5                                        | 295                                            | 1                         | 295                                          |                     | 2793                                         | 349                                |                                   | 560                                     | 295                                            | 1.02                     | 300.90                         |                                | 608.72             | -307.82                             | -518.05                        | -825.87                          |                               |
| 134              | 1972 | Wu Jingyu                         | 2               | low-middle-class peasant | 27                    | 3                      | 2                     | 1                       | 6                              | 1                         |                           | 5                              | 58                                     | 793.6                     | 103.4                            | 897                    |                                      |                                      |                                         | 41                              |                                                       | 58                                       | 33.3                       | 1931.4                                        | 856                                            | 1                         | 856                                          |                     | 2787                                         | 465                                |                                   | 420                                     | 856                                            | 1.02                     | 873.12                         |                                | 802.84             | 70.28                               | 402.47                         | 472.75                           |                               |

(cont.)

| Household number | Year | Name of the head of the household | Production team | Class status (1)           | Basic work points (2) | Total labor forces (3) | Male labor forces (4) | Female labor forces (5) | Total household population (6) | Age: 1 to 3 years old (7) | Age: 4 to 7 years old (8) | Age: 8 years old and above (9) | Work points of grain distribution (10) | Laboring work points (11) | Farmyard manure work points (12) | Total work points (13) | Work points of compulsory labor (14) | Work points of help cultivation (15) | Work points of private plots labor (16) | Total deducted work points (17) | Actual workdays of participation in distribution (18) | Workpoints for rations distribution (19) | Rations per workpoint (20) | Total rations received from distribution (21) | Workdays of participation in distribution (22) | Grains per workpoint (23) | Total grains distributed by work-points (24) | Grains subsidy (25) | Total Grains received from distribution (26) | Distributed grains per person (27) | Distributed grains per adult (28) | Grains received from private plots (29) | Workdays of participation in distribution (30) | Value per workpoint (31) | Total value of workpoints (32) | Money used for investment (33) | Sum of income (34) | Money distributed in this year (34) | Deposit/debt of this year (35) | Deposit/debt over the years (36) | Accumulated deposit/debt (37) |         |         |
|------------------|------|-----------------------------------|-----------------|----------------------------|-----------------------|------------------------|-----------------------|-------------------------|--------------------------------|---------------------------|---------------------------|--------------------------------|----------------------------------------|---------------------------|----------------------------------|------------------------|--------------------------------------|--------------------------------------|-----------------------------------------|---------------------------------|-------------------------------------------------------|------------------------------------------|----------------------------|-----------------------------------------------|------------------------------------------------|---------------------------|----------------------------------------------|---------------------|----------------------------------------------|------------------------------------|-----------------------------------|-----------------------------------------|------------------------------------------------|--------------------------|--------------------------------|--------------------------------|--------------------|-------------------------------------|--------------------------------|----------------------------------|-------------------------------|---------|---------|
| 135              | 1972 | Wu Jinghua                        | 2               | low-middle-class peasant   | 37                    | 4                      | 3                     | 1                       | 6                              |                           | 1                         | 5                              | 59                                     | 1118.4                    | 118.6                            | 1237                   |                                      |                                      |                                         | 56                              |                                                       | 59                                       | 33.3                       | 1964.7                                        | 1181                                           | 1                         | 1181                                         | 100                 | 3246                                         |                                    | 541                               |                                         | 420                                            | 731                      | 1.02                           | 745.62                         |                    |                                     | 785.84                         | -40.22                           | 365.10                        | 324.88  |         |
| 136              | 1972 | Wu Changbiao                      | 2               | middle-class peasant       |                       |                        |                       |                         | 1                              |                           |                           | 1                              | 10                                     | 215.1                     |                                  | 215                    |                                      |                                      |                                         |                                 |                                                       | 10                                       | 33.3                       | 333                                           | 215                                            | 1                         | 215                                          |                     | 548                                          |                                    | 548                               |                                         | 70                                             | 215                      | 1.02                           | 219.40                         |                    |                                     | 189.67                         | 29.73                            | 169.75                        | 199.48  |         |
| 137              | 1972 | Wu Jingnan                        | 2               | middle-class peasant       | 17                    | 2                      | 1                     | 1                       | 7                              | 1                         | 2                         | 4                              | 66                                     | 394.1                     | 221.1                            | 615                    |                                      |                                      |                                         | 11                              |                                                       | 66                                       | 33.3                       | 2197.8                                        | 604                                            | 1                         | 604                                          |                     | 2802                                         |                                    | 400                               |                                         | 490                                            | 604                      | 1.02                           | 616.28                         |                    |                                     | 609.02                         | 7.26                             | -110.52                       | -103.26 |         |
| 138              | 1972 | Wu Jing'an                        | 2               | middle-class peasant       | 17                    | 2                      | 1                     | 1                       | 3                              |                           |                           | 3                              | 30                                     | 303.6                     | 51.2                             | 355                    |                                      |                                      |                                         | 26                              |                                                       | 30                                       | 33.3                       | 999                                           | 329                                            | 1                         | 329                                          |                     | 1328                                         |                                    | 443                               |                                         | 210                                            | 329                      | 1.02                           | 335.38                         |                    |                                     | 315.92                         | 19.46                            | 137.06                        | 156.52  |         |
| 139              | 1972 | Wu Jinghui                        | 2               | middle-class peasant       | 17                    | 2                      | 1                     | 1                       | 5                              | 1                         | 1                         | 3                              | 47                                     | 552.5                     | 134.3                            | 687                    |                                      |                                      |                                         | 26                              |                                                       | 47                                       | 33.3                       | 1565.1                                        | 661                                            | 1                         | 661                                          | 20                  | 2246                                         |                                    | 449                               |                                         | 350                                            | 661                      | 1.02                           | 674.02                         |                    |                                     | 517.43                         | 156.59                           | 158.26                        | 314.85  |         |
| 140              | 1972 | Wu Jingying                       | 2               | middle-class peasant       | 17                    | 2                      | 1                     | 1                       | 8                              | 1                         | 1                         | 6                              | 77                                     | 593.2                     | 145.5                            | 739                    |                                      |                                      |                                         | 26                              |                                                       | 77                                       | 33.3                       | 2564.1                                        | 713                                            | 1                         | 713                                          |                     | 3277                                         |                                    | 410                               |                                         | 560                                            | 713                      | 1.02                           | 726.95                         |                    |                                     | 664.07                         | 62.88                            | -311.40                       | -248.52 |         |
| 141              | 1972 | Wu Jingfu                         | 2               | middle-class peasant       | 17                    | 2                      | 1                     | 1                       | 5                              | 1                         | 2                         | 2                              | 46                                     | 303.2                     | 54                               | 290                    |                                      |                                      |                                         | 26                              |                                                       | 46                                       | 33.3                       | 1531.8                                        | 331                                            | 1                         | 331                                          |                     | 1863                                         |                                    | 373                               |                                         | 350                                            | 331                      | 1.02                           | 337.62                         | 40.00              |                                     | 427.16                         | -49.54                           | 32.43                         | -17.11  |         |
| 142              | 1972 | Meng Dongmei                      | 2               | low-middle-class peasant   | 7                     | 1                      | 0                     | 1                       | 4                              | 1                         | 1                         | 2                              | 37                                     | 33.1                      | 6                                | 39                     |                                      |                                      |                                         | 11                              |                                                       | 37                                       | 33.3                       | 1232.1                                        | 28                                             | 1                         | 28                                           |                     | 1260                                         |                                    | 315                               |                                         | 280                                            | 28                       | 1.02                           | 28.66                          | 220.00             |                                     | 212.82                         | 35.84                            | -74.07                        | -38.23  |         |
| 143              | 1972 | Mneg Tianyu                       | 2               | poor peasant               | 36                    | 5                      | 3                     | 2                       | 8                              | 1                         |                           | 7                              | 78                                     | 1065.1                    | 111.2                            | 1176                   |                                      |                                      |                                         | 54                              |                                                       | 78                                       | 33.3                       | 2597.4                                        | 1122                                           | 1                         | 1122                                         |                     | 3720                                         |                                    | 465                               |                                         | 560                                            | 1122                     | 1.02                           | 1144.75                        |                    |                                     | 886.31                         | 258.44                           | 350.25                        | 608.69  |         |
| 144              | 1972 | Xue Lanying                       | 2               | middle-class peasant       |                       |                        |                       |                         |                                |                           |                           |                                |                                        |                           |                                  | 0                      |                                      |                                      |                                         |                                 | 0                                                     | 33.3                                     | 111                        | 0                                             | 1                                              | 0                         |                                              | 111                 |                                              | 111                                |                                   | 111                                     |                                                | 0                        | 0                              | 1.02                           | 0.00               |                                     |                                | 26.07                            | -26.07                        | -371.48 | -397.55 |
| 145              | 1972 | Wang Shufu                        | 2               | poor peasant               | 17                    | 2                      | 1                     | 1                       | 3                              | 1                         |                           | 2                              | 28                                     | 357.5                     | 83.5                             | 441                    |                                      |                                      |                                         | 26                              |                                                       | 28                                       | 33.3                       | 932.4                                         | 415                                            | 1                         | 415                                          |                     | 1347                                         |                                    | 449                               |                                         | 210                                            | 415                      | 1.02                           | 423.30                         |                    |                                     | 349.38                         | 73.92                            | 171.78                        | 245.70  |         |
| 146              | 1972 | Li Changsheng                     | 2               | poor peasant               | 15                    | 2                      | 1                     | 1                       | 7                              | 1                         | 2                         | 4                              | 66                                     | 599.4                     | 54.9                             | 654                    |                                      |                                      |                                         | 8                               |                                                       | 66                                       | 33.3                       | 2197.8                                        | 646                                            | 1                         | 646                                          |                     | 2844                                         |                                    | 406                               |                                         | 490                                            | 646                      | 1.02                           | 659.23                         |                    |                                     | 653.51                         | 5.72                             | 171.03                        | 176.75  |         |
| 147              | 1972 | Zhang Yongqing                    | 2               | poor peasant               |                       |                        |                       |                         | 1                              |                           |                           | 1                              | 10                                     | 266.2                     | 22.5                             | 289                    |                                      |                                      |                                         |                                 |                                                       | 10                                       | 33.3                       | 333                                           | 289                                            | 1                         | 289                                          |                     | 622                                          |                                    | 622                               |                                         | 70                                             | 289                      | 1.02                           | 294.47                         |                    |                                     | 311.86                         | -17.39                           | 418.66                        | 401.27  |         |
| 148              | 1972 | Wang Suzhen                       | 2               | poor peasant               |                       |                        |                       |                         | 1                              |                           |                           | 1                              | 10                                     | 6.0                       | 11.5                             | 18                     |                                      |                                      |                                         |                                 |                                                       | 10                                       | 33.3                       | 333                                           | 18                                             | 1                         | 18                                           |                     | 351                                          |                                    | 351                               |                                         | 70                                             | 18                       | 1.02                           | 17.85                          |                    |                                     | 66.64                          | -48.79                           | -512.42                       | -561.21 |         |
| 149              | 1972 | Liu Chunxiang                     | 2               | upper-middle-class peasant | 26                    | 4                      | 2                     | 2                       | 4                              |                           |                           | 4                              | 40                                     | 985.9                     | 107.8                            | 1094                   |                                      |                                      |                                         | 39                              |                                                       | 40                                       | 33.3                       | 1332                                          | 1055                                           | 1                         | 1055                                         |                     | 2387                                         |                                    | 597                               |                                         | 280                                            | 1055                     | 1.02                           | 1075.79                        |                    |                                     | 634.51                         | 441.28                           | 485.08                        | 926.36  |         |
| 150              | 1972 | Liu Chunyou                       | 2               | low-middle-class peasant   | 17                    | 2                      | 1                     | 1                       | 5                              | 2                         |                           | 3                              | 46                                     | 828.3                     | 131.1                            | 959                    |                                      |                                      |                                         | 26                              |                                                       | 46                                       | 33.3                       | 1421                                          | 933                                            | 1                         | 933                                          |                     | 2354                                         |                                    | 471                               |                                         | 350                                            | 933                      | 1.02                           | 952.07                         |                    |                                     | 700.44                         | 251.63                           | 614.49                        | 866.12  |         |
| 151              | 1972 | Wang Kaitai                       | 2               | middle-class peasant       | 17                    | 2                      | 1                     | 1                       | 5                              | 1                         | 1                         | 3                              | 47                                     | 281.8                     | 71.4                             | 353                    |                                      |                                      |                                         | 26                              |                                                       | 47                                       | 33.3                       | 1565.1                                        | 327                                            | 1                         | 327                                          |                     | 1892                                         |                                    | 378                               |                                         | 350                                            | 327                      | 1.02                           | 333.74                         |                    |                                     | 499.60                         | -165.86                          | 160.79                        | -5.07   |         |
| 152              | 1972 | Meng Minghuan                     | 2               | middle-class peasant       |                       |                        |                       |                         | 2                              |                           |                           | 2                              | 20                                     | 1.8                       | 152.1                            | 154                    |                                      |                                      |                                         |                                 |                                                       | 20                                       | 33.3                       | 666                                           | 154                                            | 1                         | 154                                          |                     | 820                                          |                                    | 410                               |                                         | 140                                            | 154                      | 1.02                           | 156.98                         |                    |                                     | 160.50                         | -3.52                            | -104.39                       | -107.91 |         |

(cont.)

| Household number | Year | Name of the head of the household | Production team | Class status (1)           | Basic work points (2) | Total labor forces (3) | Male labor forces (4) | Female labor forces (5) | Total household population (6) | Age: 1 to 3 years old (7) | Age: 4 to 7 years old (8) | Age: 8 years old and above (9) | Work points of grain distribution (10) | Laboring work points (11) | Farmyard manure work points (12) | Total work points (13) | Work points of compulsory labor (14) | Work points of help cultivation (15) | Work points of private plots labor (16) | Total deducted work points (17) | Actual workdays of participation in distribution (18) | Workpoints for rations distribution (19) | Rations per workpoint (20) | Total rations received from distribution (21) | Workdays of participation in distribution (22) | Grains per workpoint (23) | Total grains distributed by work-points (24) | Grains subsidy (25) | Total Grains received from distribution (26) | Distributed grains per person (27) | Distributed grains per adult (28) | Grains received from private plots (29) | Workdays of participation in distribution (30) | Value per workpoint (31) | Total value of workpoints (32) | Money used for investment (33) | Sum of income (34) | Money distributed in this year (34) | Deposit/debt of this year (35) | Deposit/debt over the years (36) | Accumulated deposit/debt (37) |
|------------------|------|-----------------------------------|-----------------|----------------------------|-----------------------|------------------------|-----------------------|-------------------------|--------------------------------|---------------------------|---------------------------|--------------------------------|----------------------------------------|---------------------------|----------------------------------|------------------------|--------------------------------------|--------------------------------------|-----------------------------------------|---------------------------------|-------------------------------------------------------|------------------------------------------|----------------------------|-----------------------------------------------|------------------------------------------------|---------------------------|----------------------------------------------|---------------------|----------------------------------------------|------------------------------------|-----------------------------------|-----------------------------------------|------------------------------------------------|--------------------------|--------------------------------|--------------------------------|--------------------|-------------------------------------|--------------------------------|----------------------------------|-------------------------------|
| 153              | 1972 | Meng Qingfu                       | 2               | middle-class peasant       | 10                    | 1                      | 1                     | 0                       | 1                              |                           |                           | 1                              | 10                                     | 410.0                     | 83                               | 493                    |                                      |                                      |                                         | 15                              |                                                       | 10                                       | 33.3                       | 333                                           | 478                                            | 1                         | 478                                          | 20                  | 831                                          | 831                                |                                   | 70                                      | 478                                            | 1.02                     | 487.56                         | 1.00                           |                    | 334.11                              | 154.45                         | 264.45                           | 418.90                        |
| 154              | 1972 | Mneg Qingsheng                    | 2               | middle-class peasant       | 10                    | 1                      | 1                     | 0                       | 1                              |                           |                           | 1                              | 10                                     | 296.5                     | 3.2                              | 300                    |                                      |                                      |                                         | 15                              |                                                       | 10                                       | 33.3                       | 333                                           | 285                                            | 1                         | 285                                          |                     | 618                                          | 618                                |                                   | 70                                      | 285                                            | 1.02                     | 290.39                         |                                |                    | 206.25                              | 84.14                          | 139.05                           | 223.19                        |
| 155              | 1972 | Meng Qingbao                      | 2               | middle-class peasant       | 10                    | 1                      | 1                     | 0                       | 2                              |                           |                           | 2                              | 20                                     | 187.2                     | 46.7                             | 234                    |                                      |                                      |                                         | 15                              |                                                       | 20                                       | 33.3                       | 666                                           | 219                                            | 1                         | 219                                          |                     | 885                                          | 442                                |                                   | 140                                     | 219                                            | 1.02                     | 223.28                         |                                |                    | 204.27                              | 19.01                          | -244.93                          | -225.92                       |
| 156              | 1972 | Cao Jincheng                      | 2               | poor peasant               | 10                    | 1                      | 1                     | 0                       | 1                              |                           |                           | 1                              | 10                                     | 261.8                     |                                  | 262                    |                                      |                                      |                                         | 15                              |                                                       | 10                                       | 33.3                       | 333                                           | 247                                            | 1                         | 247                                          |                     | 580                                          | 580                                |                                   | 70                                      | 247                                            | 1.02                     | 251.74                         |                                |                    | 188.92                              | 62.82                          | 150.61                           | 213.43                        |
| 157              | 1972 | Cao Jinwei                        | 2               | poor peasant               | 13                    | 2                      | 1                     | 1                       | 2                              |                           |                           | 2                              | 20                                     | 335.7                     | 8.4                              | 344                    |                                      |                                      |                                         | 20                              |                                                       | 20                                       | 33.3                       | 666                                           | 324                                            | 1                         | 324                                          |                     | 990                                          | 495                                |                                   | 140                                     | 324                                            | 1.02                     | 330.58                         |                                |                    | 307.71                              | 22.87                          | 297.10                           | 319.97                        |
| 158              | 1972 | Meng Tianlai                      | 2               | middle-class peasant       | 17                    | 2                      | 1                     | 1                       | 4                              | 1                         |                           | 3                              | 38                                     | 339.7                     | 106.1                            | 446                    |                                      |                                      |                                         | 26                              |                                                       | 38                                       | 33.3                       | 1177                                          | 420                                            | 1                         | 420                                          | 50                  | 1647                                         | 412                                |                                   | 280                                     | 420                                            | 1.02                     | 428.20                         |                                |                    | 452.59                              | -24.39                         | 147.08                           | 122.69                        |
| 159              | 1972 | Yu Guiying                        | 1               | poor peasant               |                       |                        |                       |                         | 1                              |                           |                           | 1                              | 10                                     | 8.9                       |                                  | 9                      |                                      |                                      |                                         |                                 |                                                       | 10                                       | 33.3                       | 333                                           | 9                                              | 1                         | 9                                            |                     | 342                                          | 342                                |                                   | 70                                      | 9                                              | 1.04                     | 9.26                           |                                |                    | 71.31                               | -62.05                         | -398.53                          | -460.58                       |
| 160              | 1972 | Liu Chunxiao                      | 2               | upper-middle-class peasant | 17                    | 2                      | 1                     | 1                       | 3                              |                           |                           | 3                              | 30                                     | 368.8                     | 60.7                             | 430                    |                                      |                                      |                                         | 26                              |                                                       | 30                                       | 33.3                       | 999                                           | 404                                            | 1                         | 404                                          | 20                  | 1423                                         | 474                                |                                   | 210                                     | 404                                            | 1.02                     | 411.57                         |                                |                    | 404.31                              | 7.26                           | 148.52                           | 155.78                        |
| 161              | 1972 | Meng Qinghua                      | 2               | low-middle-class peasant   | 8                     | 1                      | 1                     | 0                       | 1                              |                           |                           | 1                              | 10                                     | 181.0                     | 21                               | 202                    |                                      |                                      |                                         | 12                              |                                                       | 10                                       | 33.3                       | 333                                           | 190                                            | 1                         | 190                                          |                     | 523                                          | 523                                |                                   | 70                                      | 190                                            | 1.02                     | 193.80                         |                                |                    | 163.24                              | 30.56                          | 163.16                           | 193.72                        |
| 162              | 1972 | Meng Peigui                       | 2               | rich peasant               | 13                    | 2                      | 1                     | 1                       | 2                              |                           |                           | 2                              | 20                                     | 308.6                     | 34.7                             | 343                    |                                      |                                      |                                         | 35                              |                                                       | 20                                       | 33.3                       | 666                                           | 308                                            | 1                         | 308                                          |                     | 974                                          | 487                                |                                   | 140                                     | 308                                            | 1.02                     | 314.47                         |                                |                    | 266.18                              | 48.29                          | 122.44                           | 170.73                        |
| 163              | 1972 | Meng Peiji                        | 2               | rich peasant               | 17                    | 2                      | 1                     | 1                       | 7                              |                           |                           | 7                              | 70                                     | 581.9                     | 176.6                            | 759                    |                                      |                                      |                                         | 41                              |                                                       | 70                                       | 33.3                       | 2331                                          | 718                                            | 1                         | 718                                          |                     | 3049                                         | 436                                |                                   | 490                                     | 718                                            | 1.02                     | 732.36                         | 10.00                          |                    | 603.15                              | 139.21                         | -192.31                          | -53.10                        |
| 164              | 1972 | Meng Jinghuan                     | 2               | upper-middle-class peasant | 7                     | 1                      | 0                     | 1                       | 4                              | 1                         |                           | 3                              | 38                                     | 228.4                     | 26.8                             | 255                    |                                      |                                      |                                         | 11                              |                                                       | 38                                       | 33.3                       | 1177                                          | 244                                            | 1                         | 244                                          |                     | 1421                                         | 355                                |                                   | 280                                     | 244                                            | 1.02                     | 249.08                         | 55.00                          |                    | 220.71                              | 83.37                          | 0.70                             | 84.07                         |
| 165              | 1972 | Lan Jinzhi                        | 0               | poor peasant               |                       |                        |                       |                         |                                |                           |                           |                                |                                        |                           |                                  | 0                      |                                      |                                      |                                         |                                 |                                                       | 0                                        | 33.3                       | 0                                             | 0                                              | 1                         | 0                                            |                     | 0                                            | #DIV/0!                            | 0                                 | 0                                       | 1.04                                           | 0.00                     |                                |                                |                    |                                     | 0.00                           | 0.00                             |                               |
| 166              | 1972 | Wang Jinshu                       | 2               | upper-middle-class peasant |                       |                        |                       |                         | 1                              |                           |                           | 1                              | 10                                     |                           |                                  | 0                      |                                      |                                      |                                         |                                 |                                                       | 10                                       | 33.3                       | 333                                           | 0                                              | 1                         | 0                                            |                     | 333                                          | 333                                |                                   | 70                                      | 0                                              | 1.02                     | 0.00                           |                                |                    | 38.09                               | -38.09                         | -73.88                           | -111.97                       |
| 167              | 1972 | Cao Xiangyun                      | 2               | upper-middle-class peasant | 7                     | 1                      | 0                     | 1                       | 6                              |                           | 1                         | 5                              | 59                                     | 52.0                      | 151.6                            | 204                    |                                      |                                      |                                         | 11                              |                                                       | 59                                       | 33.3                       | 1964.7                                        | 193                                            | 1                         | 193                                          |                     | 2157                                         | 360                                |                                   | 420                                     | 193                                            | 1.02                     | 196.45                         | 256.00                         |                    | 369.27                              | 83.18                          | -34.83                           | 48.35                         |
| 168              | 1972 | Li Shibao                         | 2               | poor peasant               | 17                    | 2                      | 1                     | 1                       | 9                              | 1                         | 2                         | 6                              | 86                                     | 589.7                     | 122                              | 712                    |                                      |                                      |                                         | 26                              |                                                       | 86                                       | 33.3                       | 2863.8                                        | 686                                            | 1                         | 686                                          | 54                  | 3604                                         | 400                                |                                   | 630                                     | 686                                            | 1.02                     | 699.41                         |                                |                    | 734.36                              | -34.95                         | -996.98                          | -1031.93                      |
| 169              | 1972 | Wang Kailu                        | 2               | poor peasant               | 21                    | 3                      | 2                     | 1                       | 6                              |                           | 1                         | 5                              | 59                                     | 774.2                     | 94.5                             | 869                    |                                      |                                      |                                         | 32                              |                                                       | 59                                       | 33.3                       | 1964.7                                        | 837                                            | 1                         | 837                                          | 20                  | 2821                                         | 470                                |                                   | 420                                     | 837                                            | 1.02                     | 853.43                         |                                |                    | 747.04                              | 106.39                         | 372.31                           | 478.70                        |
| 170              | 1972 | Zhao Hongrui                      | 1               | middle-class peasant       | 37                    | 4                      | 3                     | 1                       | 9                              | 2                         |                           | 7                              | 86                                     | 1098.6                    | 191.4                            | 1290                   |                                      |                                      |                                         | 56                              |                                                       | 86                                       | 33.3                       | 2863.8                                        | 1234                                           | 1                         | 1234                                         | 20                  | 4118                                         | 458                                |                                   | 630                                     | 1234                                           | 1.04                     | 1283.36                        |                                |                    | 966.41                              | 316.95                         | 214.93                           | 531.88                        |
| 171              | 1972 | Fang Chunxing                     | 0               | middle-class peasant       |                       |                        |                       |                         |                                |                           |                           |                                |                                        |                           |                                  | 0                      |                                      |                                      |                                         |                                 |                                                       | 0                                        | 33.3                       | 0                                             | 0                                              | 1                         | 0                                            |                     | 0                                            | #DIV/0!                            | 0                                 | 0                                       | 1.04                                           | 0.00                     |                                |                                |                    |                                     | 0.00                           | 0.00                             |                               |
| 172              | 1972 | Zhao Honglin                      | 2               | middle-class peasant       | 7                     | 1                      | 0                     | 1                       | 5                              | 1                         | 1                         | 3                              | 47                                     |                           | 41.6                             | 42                     |                                      |                                      |                                         | 11                              |                                                       | 47                                       | 33.3                       | 1565.1                                        | 31                                             | 1                         | 31                                           |                     | 1596                                         | 319                                |                                   | 350                                     | 31                                             | 1.02                     | 31.21                          | 260.00                         |                    | 366.62                              | -75.41                         | -127.23                          | -202.64                       |

(cont.)

| Household number | Year | Name of the head of the household | Production team | Class status (1)         | Basic work points (2) | Total labor forces (3) | Male labor forces (4) | Female labor forces (5) | Total household population (6) | Age: 1 to 3 years old (7) | Age: 4 to 7 years old (8) | Age: 8 years old and above (9) | Work points of grain distribution (10) | Laboring work points (11) | Farmyard manure work points (12) | Total work points (13) | Work points of compulsory labor (14) | Work points of help cultivation (15) | Work points of private plots labor (16) | Total deducted work points (17) | Acutal workdays of participation in distribution (18) | Workpoints for rations distribution (19) | Rations per workpoint (20) | Total rations received form distribution (21) | Workdays of participation in distribu-tion (22) | Grains per workpoint (23) | Total grains distributed by work-points (24) | Grains subsidy (25) | Total Grains received from distribution (26) | Distributed grains per person (27) | Distributed grains per adult (28) | Grains received from privated plots (29) | Workdays of participation in distribution (30) | Value per workpoint (31) | Total value of workpoints (32) | Money used for investment (33) | Sum of income (34) | Money distributed in this year (34) | Deposit/ debt of this year (35) | Deposit/ debt over the years (36) | Accumulated deposit/debt (37) |
|------------------|------|-----------------------------------|-----------------|--------------------------|-----------------------|------------------------|-----------------------|-------------------------|--------------------------------|---------------------------|---------------------------|--------------------------------|----------------------------------------|---------------------------|----------------------------------|------------------------|--------------------------------------|--------------------------------------|-----------------------------------------|---------------------------------|-------------------------------------------------------|------------------------------------------|----------------------------|-----------------------------------------------|-------------------------------------------------|---------------------------|----------------------------------------------|---------------------|----------------------------------------------|------------------------------------|-----------------------------------|------------------------------------------|------------------------------------------------|--------------------------|--------------------------------|--------------------------------|--------------------|-------------------------------------|---------------------------------|-----------------------------------|-------------------------------|
| 173              | 1972 | Yu Jinquan                        | 0               | poor peasant             |                       |                        |                       |                         |                                |                           |                           |                                |                                        |                           |                                  | 0                      |                                      |                                      |                                         |                                 | 0                                                     | 33.3                                     | 0                          | 0                                             | 1                                               | 0                         | 0                                            | #DIV/o!             | 0                                            | 0                                  | 1.04                              | 0.00                                     |                                                |                          | 0.00                           | 0.00                           |                    |                                     |                                 |                                   |                               |
| 174              | 1972 | Yu Jinliang                       | 0               | poor peasant             |                       |                        |                       |                         |                                |                           |                           |                                |                                        |                           |                                  | 0                      |                                      |                                      |                                         |                                 | 0                                                     | 33.3                                     | 0                          | 0                                             | 1                                               | 0                         | 0                                            | #DIV/o!             | 0                                            | 0                                  | 1.04                              | 0.00                                     |                                                |                          | 0.00                           | 0.00                           |                    |                                     |                                 |                                   |                               |
| 175              | 1972 | Mu Zhaoxin                        | 2               | poor peasant             | 7                     | 1                      | 0                     | 1                       | 2                              | 1                         |                           | 1                              | 18                                     | 52.4                      | 11.6                             | 64                     |                                      |                                      |                                         | 11                              | 18                                                    | 33.3                                     | 599.4                      | 53                                            | 1                                               | 53                        | 608                                          | 304                 | 140                                          | 53                                 | 1.02                              | 54.06                                    |                                                | 105.42                   | -51.36                         | 72.00                          | 20.64              |                                     |                                 |                                   |                               |
| 176              | 1972 | Wang Guijing                      | 0               | poor peasant             |                       |                        |                       |                         |                                |                           |                           |                                |                                        |                           |                                  | 0                      |                                      |                                      |                                         |                                 | 0                                                     | 33.3                                     | 0                          | 0                                             | 1                                               | 0                         | 0                                            | #DIV/o!             | 0                                            | 0                                  | 1.04                              | 0.00                                     |                                                |                          | 0.00                           | 0.00                           |                    |                                     |                                 |                                   |                               |
| 177              | 1972 | Zhang Xuezhong                    | 1               | low-middle-class peasant | 24                    | 3                      | 1                     | 2                       | 9                              | 1                         | 2                         | 6                              | 86                                     | 555.1                     | 61.5                             | 617                    |                                      |                                      |                                         | 36                              | 86                                                    | 33.3                                     | 2863.8                     | 581                                           | 1                                               | 581                       | 3444                                         | 383                 | 630                                          | 581                                | 1.04                              | 603.82                                   |                                                | 722.33                   | -118.51                        | -1283.67                       | -1402.18           |                                     |                                 |                                   |                               |
| 178              | 1972 | Jia Anji                          | 2               | poor peasant             | 17                    | 2                      | 1                     | 1                       | 5                              |                           |                           | 5                              | 50                                     | 575.0                     | 124.5                            | 700                    |                                      |                                      |                                         | 26                              | 50                                                    | 33.3                                     | 1665                       | 674                                           | 1                                               | 674                       | 30                                           | 2369                | 474                                          | 350                                | 674                               | 1.02                                     | 686.97                                         |                          | 473.30                         | 213.67                         | -10.17             | 203.50                              |                                 |                                   |                               |
| 179              | 1972 | Liu Peishou                       | 1               | middle-class peasant     | 18                    | 2                      | 2                     | 0                       | 4                              |                           |                           | 4                              | 40                                     | 672.3                     | 118                              | 790                    |                                      |                                      |                                         | 27                              | 40                                                    | 33.3                                     | 1332                       | 763                                           | 1                                               | 763                       | 2095                                         | 524                 | 280                                          | 763                                | 1.04                              | 793.83                                   |                                                | 480.71                   | 313.12                         | 251.17                         | 564.29             |                                     |                                 |                                   |                               |
| 180              | 1972 | Gao Yunxian                       | 2               | middle-class peasant     | 27                    | 3                      | 2                     | 1                       | 9                              | 1                         |                           | 8                              | 88                                     | 828.2                     | 143.2                            | 971                    |                                      |                                      |                                         | 41                              | 88                                                    | 33.3                                     | 2930.4                     | 930                                           | 1                                               | 930                       | 120                                          | 3981                | 442                                          | 630                                | 930                               | 1.02                                     | 949.01                                         |                          | 861.41                         | 87.60                          | 200.64             | 288.24                              |                                 |                                   |                               |
| 181              | 1972 | Tian Kehua                        | 2               | middle-class peasant     |                       |                        |                       |                         | 1                              |                           |                           | 1                              | 10                                     | 107.5                     |                                  | 108                    |                                      |                                      |                                         |                                 | 10                                                    | 33.3                                     | 333                        | 108                                           | 1                                               | 108                       | 441                                          | 441                 | 70                                           | 108                                | 1.02                              | 109.65                                   |                                                | 88.68                    | 20.97                          | -53.66                         | -32.69             |                                     |                                 |                                   |                               |
| 182              | 1972 | Tian Dawei                        | 1               | middle-class peasant     | 17                    | 2                      | 1                     | 1                       | 5                              | 1                         | 1                         | 3                              | 47                                     | 425.9                     | 77.6                             | 504                    |                                      |                                      |                                         | 26                              | 47                                                    | 33.3                                     | 1565.1                     | 478                                           | 1                                               | 478                       | 20                                           | 2063                | 413                                          | 350                                | 478                               | 1.04                                     | 496.60                                         |                          | 451.18                         | 45.42                          | -198.71            | -153.29                             |                                 |                                   |                               |
| 183              | 1972 | Fan Liyuan                        | 2               | middle-class peasant     | 18                    | 2                      | 2                     | 0                       | 4                              |                           |                           | 4                              | 40                                     | 517.4                     | 140.5                            | 658                    |                                      |                                      |                                         | 27                              | 40                                                    | 33.3                                     | 1332                       | 631                                           | 1                                               | 631                       | 1963                                         | 491                 | 280                                          | 631                                | 1.02                              | 643.52                                   |                                                | 533.00                   | 110.52                         | 418.42                         | 528.94             |                                     |                                 |                                   |                               |
| 184              | 1972 | Fan Shutang                       | 1               | middle-class peasant     | 17                    | 2                      | 1                     | 1                       | 6                              |                           | 2                         | 4                              | 58                                     | 448.5                     | 72.3                             | 521                    |                                      |                                      |                                         | 26                              | 58                                                    | 33.3                                     | 1931.4                     | 495                                           | 1                                               | 495                       | 100                                          | 2526                | 421                                          | 420                                | 495                               | 1.04                                     | 514.59                                         |                          | 509.12                         | 5.47                           | -170.91            | -165.44                             |                                 |                                   |                               |
| 185              | 1972 | Fan Chunxiang                     | 1               | middle-class peasant     | 7                     | 1                      | 0                     | 1                       | 3                              |                           | 1                         | 2                              | 29                                     | 125.5                     | 43.5                             | 169                    |                                      |                                      |                                         | 11                              | 29                                                    | 33.3                                     | 965.7                      | 158                                           | 1                                               | 158                       | 1124                                         | 375                 | 210                                          | 158                                | 1.04                              | 164.32                                   | 52.20                                          | 181.61                   | 34.91                          | 4.04                           | 38.95              |                                     |                                 |                                   |                               |
| 186              | 1972 | Lian Huaizhe                      | 1               | poor peasant             | 11                    | 2                      | 1                     | 1                       | 3                              |                           |                           | 3                              | 30                                     | 426.1                     | 48.1                             | 474                    |                                      |                                      |                                         | 17                              | 30                                                    | 33.3                                     | 999                        | 457                                           | 1                                               | 457                       | 1456                                         | 485                 | 210                                          | 457                                | 1.04                              | 475.49                                   |                                                | 373.28                   | 102.21                         | 23.53                          | 125.74             |                                     |                                 |                                   |                               |
| 187              | 1972 | Lian Wenbing                      | 2               | poor peasant             | 17                    | 2                      | 1                     | 1                       | 5                              | 1                         | 2                         | 2                              | 46                                     | 363.3                     | 18                               | 381                    |                                      |                                      |                                         | 26                              | 46                                                    | 33.3                                     | 1465                       | 355                                           | 1                                               | 355                       | 1820                                         | 364                 | 350                                          | 355                                | 1.02                              | 362.41                                   |                                                | 378.00                   | -15.59                         | -149.32                        | -164.91            |                                     |                                 |                                   |                               |
| 188              | 1972 | Wu Congyi                         | 2               | poor peasant             | 17                    | 2                      | 1                     | 1                       | 8                              | 1                         | 1                         | 6                              | 77                                     | 482.4                     | 99.3                             | 582                    |                                      |                                      |                                         | 26                              | 77                                                    | 33.3                                     | 2564.1                     | 556                                           | 1                                               | 556                       | 3120                                         | 390                 | 560                                          | 556                                | 1.02                              | 566.81                                   | 15.00                                          | 615.93                   | -34.12                         | -602.63                        | -636.75            |                                     |                                 |                                   |                               |
| 189              | 1972 | Wu Laifu                          | 1               | poor peasant             | 17                    | 2                      | 1                     | 1                       | 6                              | 1                         | 1                         | 4                              | 57                                     | 330.8                     | 20.4                             | 351                    |                                      |                                      |                                         | 26                              | 57                                                    | 33.3                                     | 1898.1                     | 325                                           | 1                                               | 325                       | 2223                                         | 371                 | 420                                          | 325                                | 1.04                              | 338.21                                   |                                                | 468.59                   | -130.38                        | -231.15                        | -361.53            |                                     |                                 |                                   |                               |
| 190              | 1972 | Tian Dayu                         | 2               | poor peasant             | 1                     |                        |                       |                         | 1                              |                           |                           | 1                              | 10                                     | 360.0                     |                                  | 360                    |                                      |                                      |                                         |                                 | 10                                                    | 33.3                                     | 333                        | 360                                           | 1                                               | 360                       | 693                                          | 693                 | 70                                           | 360                                | 1.02                              | 367.20                                   |                                                | 263.59                   | 103.61                         | 213.54                         | 317.15             |                                     |                                 |                                   |                               |
| 191              | 1972 | Liu Shuting                       | 2               | poor peasant             | 7                     | 1                      | 0                     | 1                       | 4                              |                           | 1                         | 3                              | 39                                     | 151.9                     | 36.1                             | 188                    |                                      |                                      |                                         | 11                              | 39                                                    | 33.3                                     | 1298.7                     | 177                                           | 1                                               | 177                       | 1476                                         | 369                 | 280                                          | 177                                | 1.02                              | 180.54                                   | 100.00                                         | 250.64                   | 29.90                          | 26.20                          | 56.10              |                                     |                                 |                                   |                               |
| 192              | 1972 | Meng Tiande                       | 2               | poor peasant             | 17                    | 2                      | 1                     | 1                       | 7                              |                           | 1                         | 6                              | 69                                     | 602.6                     | 92.5                             | 695                    |                                      |                                      |                                         | 26                              | 69                                                    | 33.3                                     | 2297.7                     | 669                                           | 1                                               | 669                       | 20                                           | 2987                | 427                                          | 490                                | 669                               | 1.02                                     | 682.48                                         |                          | 672.17                         | 10.31                          | -237.96            | -227.65                             |                                 |                                   |                               |
| 193              | 1972 | Meng Xiulian                      | 2               | poor peasant             | 7                     | 1                      | 0                     | 1                       | 1                              |                           |                           | 1                              | 10                                     | 108.0                     |                                  | 108                    |                                      |                                      |                                         | 11                              | 10                                                    | 33.3                                     | 333                        | 97                                            | 1                                               | 97                        | 430                                          | 430                 | 70                                           | 97                                 | 1.02                              | 98.94                                    |                                                | 85.54                    | 13.40                          | 15.84                          | 29.24              |                                     |                                 |                                   |                               |
| 194              | 1972 | Tian Genlong                      | 2               | poor peasant             | 17                    | 2                      | 1                     | 1                       | 6                              | 1                         |                           | 5                              | 59                                     | 513.3                     | 71.8                             | 585                    |                                      |                                      |                                         | 26                              | 59                                                    | 33.3                                     | 1931                       | 559                                           | 1                                               | 559                       | 2490                                         | 415                 | 420                                          | 559                                | 1.02                              | 570.28                                   |                                                | 496.37                   | 73.91                          | -484.84                        | -410.93            |                                     |                                 |                                   |                               |
| 195              | 1972 | Zhao Jinlan                       | 2               | poor peasant             | 7                     | 1                      | 0                     | 1                       | 5                              | 1                         | 1                         | 3                              | 47                                     | 106.2                     | 63                               | 169                    |                                      |                                      |                                         | 11                              | 47                                                    | 33.3                                     | 1565.1                     | 158                                           | 1                                               | 158                       | 275                                          | 1998                | 400                                          | 350                                | 158                               | 1.02                                     | 161.36                                         | 170.00                   | 339.00                         | -7.64                          | 34.26              | 26.62                               |                                 |                                   |                               |

(cont.)

| Household number | Year | Name of the head of the household | Production team | Class status (1)           | Basic work points (2) | Total labor forces (3) | Male labor forces (4) | Female labor forces (5) | Total household population (6) | Age: 1 to 3 years old (7) | Age: 4 to 7 years old (8) | Age: 8 years old and above (9) | Work points of grain distribution (10) | Laboring work points (11) | Farmyard manure work points (12) | Total work points (13) | Work points of compulsory labor (14) | Work points of help cultivation (15) | Work points of private plots labor (16) | Total deducted work points (17) | Actual workdays of participation in distribution (18) | Workpoints for rations distribution (19) | Rations per workpoint (20) | Total rations received from distribution (21) | Workdays of participation in distribution (22) | Grains per workpoint (23) | Total grains distributed by work-points (24) | Grains subsidy (25) | Total Grains received from distribution (26) | Distributed grains per person (27) | Distributed grains per adult (28) | Grains received from private plots (29) | Workdays of participation in distribution (30) | Value per workpoint (31) | Total value of workpoints (32) | Money used for investment (33) | Sum of income (34) | Money distributed in this year (34) | Deposit/debt of this year (35) | Deposit/debt over the years (36) | Accumulated deposit/debt (37) |
|------------------|------|-----------------------------------|-----------------|----------------------------|-----------------------|------------------------|-----------------------|-------------------------|--------------------------------|---------------------------|---------------------------|--------------------------------|----------------------------------------|---------------------------|----------------------------------|------------------------|--------------------------------------|--------------------------------------|-----------------------------------------|---------------------------------|-------------------------------------------------------|------------------------------------------|----------------------------|-----------------------------------------------|------------------------------------------------|---------------------------|----------------------------------------------|---------------------|----------------------------------------------|------------------------------------|-----------------------------------|-----------------------------------------|------------------------------------------------|--------------------------|--------------------------------|--------------------------------|--------------------|-------------------------------------|--------------------------------|----------------------------------|-------------------------------|
| 196              | 1972 | Liu Peiren                        | 2               | middle-class peasant       | 17                    | 2                      | 1                     | 1                       | 5                              | 1                         | 2                         | 2                              | 46                                     | 379.6                     | 20                               | 400                    |                                      |                                      |                                         | 26                              |                                                       | 46                                       | 33.3                       | 1531.8                                        | 374                                            | 1                         | 374                                          |                     | 1905                                         | 381                                |                                   | 350                                     | 374                                            | 1.02                     | 381.07                         |                                |                    | 412.61                              | -31.54                         | 101.97                           | 70.43                         |
| 197              | 1972 | Liu Peizhu                        | 2               | middle-class peasant       | 10                    | 1                      | 1                     | 0                       | 2                              |                           |                           | 2                              | 20                                     | 346.0                     | 54.8                             | 401                    |                                      |                                      |                                         | 15                              |                                                       | 20                                       | 33.3                       | 666                                           | 386                                            | 1                         | 386                                          |                     | 1052                                         | 526                                |                                   | 140                                     | 386                                            | 1.02                     | 393.52                         |                                |                    | 249.47                              | 144.05                         | 46.42                            | 190.47                        |
| 198              | 1972 | Liu Peijie                        | 2               | middle-class peasant       | 22                    | 3                      | 1                     | 2                       | 5                              | 1                         |                           | 4                              | 48                                     | 289.9                     | 23.4                             | 313                    |                                      |                                      |                                         | 33                              |                                                       | 48                                       | 33.3                       | 1598.4                                        | 280                                            | 1                         | 280                                          |                     | 1879                                         | 376                                |                                   | 350                                     | 280                                            | 1.02                     | 285.91                         |                                |                    | 364.32                              | -78.41                         | -49.36                           | -127.77                       |
| 199              | 1972 | Meng Guilan                       | 2               | poor peasant               | 7                     | 1                      | 0                     | 1                       | 4                              | 1                         | 1                         | 2                              | 37                                     | 204.8                     | 16                               | 221                    |                                      |                                      |                                         | 11                              |                                                       | 37                                       | 33.3                       | 1232.1                                        | 210                                            | 1                         | 210                                          |                     | 1442                                         | 360                                |                                   | 280                                     | 210                                            | 1.02                     | 214.00                         | 75.00                          |                    | 243.68                              | 45.32                          | -25.82                           | 19.50                         |
| 200              | 1972 | Wang Lianxiang                    | 2               | poor peasant               | 3                     | 1                      | 0                     | 1                       | 2                              |                           |                           | 2                              | 20                                     | 202.3                     | 18                               | 220                    |                                      |                                      |                                         | 5                               |                                                       | 20                                       | 33.3                       | 666                                           | 215                                            | 1                         | 215                                          |                     | 881                                          | 441                                |                                   | 140                                     | 215                                            | 1.02                     | 219.61                         |                                |                    | 205.89                              | 13.72                          | 87.11                            | 100.83                        |
| 201              | 1972 | Wang Ende                         | 2               | poor peasant               |                       |                        |                       |                         | 2                              |                           |                           | 2                              | 20                                     | 170.6                     | 20.4                             | 191                    |                                      |                                      |                                         |                                 |                                                       | 20                                       | 33.3                       | 666                                           | 191                                            | 1                         | 191                                          |                     | 857                                          | 429                                |                                   | 140                                     | 191                                            | 1.02                     | 194.82                         | 60.00                          |                    | 222.73                              | 32.09                          | 86.21                            | 118.30                        |
| 202              | 1972 | Meng Mingqing                     | 2               | low-middle-class peasant   | 17                    | 2                      | 1                     | 1                       | 7                              | 1                         | 1                         | 5                              | 67                                     | 577.8                     | 107.5                            | 685                    |                                      |                                      |                                         | 26                              |                                                       | 67                                       | 33.3                       | 2231.1                                        | 659                                            | 1                         | 659                                          |                     | 2890                                         | 413                                |                                   | 490                                     | 659                                            | 1.02                     | 672.49                         |                                |                    | 611.25                              | 61.24                          | -257.80                          | -196.56                       |
| 203              | 1972 | Meng Tianseng                     | 2               | low-middle-class peasant   | 17                    | 2                      | 1                     | 1                       | 4                              | 1                         | 1                         | 2                              | 37                                     | 482.5                     | 18                               | 501                    |                                      |                                      |                                         | 26                              |                                                       | 37                                       | 33.3                       | 1232.1                                        | 475                                            | 1                         | 475                                          |                     | 1707                                         | 427                                |                                   | 280                                     | 475                                            | 1.02                     | 483.99                         |                                |                    | 444.04                              | 39.95                          | 128.86                           | 168.81                        |
| 204              | 1972 | Wang Yueming                      | 2               | poor peasant               | 18                    | 3                      | 1                     | 2                       | 10                             | 1                         | 2                         | 7                              | 96                                     | 431.2                     | 143.7                            | 575                    |                                      |                                      |                                         | 27                              |                                                       | 96                                       | 33.3                       | 3196.8                                        | 548                                            | 1                         | 548                                          |                     | 3745                                         | 374                                |                                   | 700                                     | 548                                            | 1.02                     | 558.86                         | 160.00                         |                    | 591.15                              | 127.71                         | 88.30                            | 216.01                        |
| 205              | 1972 | Wang Heshun                       | 2               | poor peasant               | 28                    | 4                      | 2                     | 2                       | 6                              |                           | 1                         | 5                              | 59                                     | 662.9                     | 95.8                             | 759                    |                                      |                                      |                                         | 42                              |                                                       | 59                                       | 33.3                       | 1964.7                                        | 717                                            | 1                         | 717                                          |                     | 2681                                         | 447                                |                                   | 420                                     | 717                                            | 1.02                     | 731.03                         |                                |                    | 647.74                              | 83.29                          | 183.25                           | 266.54                        |
| 206              | 1972 | Wen Yingjie                       | 2               | upper-middle-class peasant | 18                    | 3                      | 1                     | 2                       | 4                              |                           |                           | 4                              | 40                                     | 614.0                     | 95                               | 709                    |                                      |                                      |                                         | 27                              |                                                       | 40                                       | 33.3                       | 1332                                          | 682                                            | 1                         | 682                                          |                     | 2014                                         | 504                                |                                   | 280                                     | 682                                            | 1.02                     | 695.64                         |                                |                    | 496.59                              | 199.05                         | 216.26                           | 415.31                        |
| 207              | 1972 | Liu Peiqian                       | 2               | low-middle-class peasant   | 23                    | 3                      | 2                     | 1                       | 8                              |                           |                           | 8                              | 80                                     | 905.5                     | 162.2                            | 1068                   |                                      |                                      |                                         | 35                              |                                                       | 80                                       | 33.3                       | 2664                                          | 1033                                           | 1                         | 1033                                         | 70                  | 3767                                         | 471                                |                                   | 560                                     | 1033                                           | 1.02                     | 1053.35                        |                                |                    | 1030.75                             | 22.60                          | 311.51                           | 334.11                        |
| 208              | 1972 | Liu Zhaoji                        | 2               | low-middle-class peasant   | 17                    | 2                      | 1                     | 1                       | 5                              | 2                         |                           | 3                              | 46                                     | 431.5                     | 18.8                             | 450                    |                                      |                                      |                                         | 26                              |                                                       | 46                                       | 33.3                       | 1465                                          | 424                                            | 1                         | 424                                          | 20                  | 1909                                         | 382                                |                                   | 350                                     | 424                                            | 1.02                     | 432.79                         |                                |                    | 393.69                              | 39.10                          | 56.40                            | 95.50                         |
| 209              | 1972 | Yu Shengliang                     | 2               | poor peasant               | 10                    | 2                      | 0                     | 2                       | 3                              |                           |                           | 3                              | 30                                     | 301.2                     | 64.4                             | 366                    |                                      |                                      |                                         | 15                              |                                                       | 30                                       | 33.3                       | 999                                           | 351                                            | 1                         | 351                                          |                     | 1350                                         | 450                                |                                   | 210                                     | 351                                            | 1.02                     | 357.61                         |                                |                    | 308.25                              | 49.36                          | 90.48                            | 139.84                        |
| 210              | 1972 | Meng Tianyou                      | 1               | poor peasant               |                       |                        |                       |                         | 1                              |                           |                           | 1                              | 10                                     | 143.1                     |                                  | 143                    |                                      |                                      |                                         |                                 |                                                       | 10                                       | 33.3                       | 333                                           | 143                                            | 1                         | 143                                          |                     | 476                                          | 476                                |                                   | 70                                      | 143                                            | 1.04                     | 148.82                         |                                |                    | 122.62                              | 26.20                          | 96.36                            | 122.56                        |
| 211              | 1972 | Meng Tianfu                       | 2               | middle-class peasant       | 25                    | 4                      | 1                     | 3                       | 7                              | 1                         |                           | 6                              | 68                                     | 597.5                     | 96                               | 694                    |                                      |                                      |                                         | 38                              |                                                       | 68                                       | 33.3                       | 2264.4                                        | 656                                            | 1                         | 656                                          | 100                 | 3020                                         | 431                                |                                   | 490                                     | 656                                            | 1.02                     | 668.61                         |                                |                    | 652.25                              | 16.36                          | -46.43                           | -30.07                        |
| 212              | 1972 | Meng Xisheng                      | 2               | middle-class peasant       | 17                    | 2                      | 1                     | 1                       | 6                              | 2                         | 2                         | 2                              | 54                                     | 379.7                     | 109.6                            | 489                    |                                      |                                      |                                         | 26                              |                                                       | 54                                       | 33.3                       | 1798.2                                        | 463                                            | 1                         | 463                                          |                     | 2262                                         | 377                                |                                   | 420                                     | 463                                            | 1.02                     | 472.57                         |                                |                    | 463.62                              | 8.95                           | 53.43                            | 62.38                         |
| 213              | 1972 | Gui Tiankuan                      | 2               | poor peasant               | 45                    | 6                      | 3                     | 3                       | 10                             | 1                         |                           | 9                              | 98                                     | 1195.8                    | 122.5                            | 1318                   |                                      |                                      |                                         | 68                              |                                                       | 98                                       | 33.3                       | 3263.4                                        | 1250                                           | 1                         | 1250                                         | 100                 | 4614                                         | 461                                |                                   | 700                                     | 1250                                           | 1.02                     | 1275.31                        | 31.40                          |                    | 1061.69                             | 245.02                         | 615.18                           | 860.20                        |
| 214              | 1972 | Kang Huaizhi                      | 2               | poor peasant               | 17                    | 2                      | 1                     | 1                       | 8                              | 2                         | 1                         | 5                              | 75                                     | 340.5                     | 27.1                             | 368                    |                                      |                                      |                                         | 26                              |                                                       | 75                                       | 33.3                       | 2497.5                                        | 342                                            | 1                         | 342                                          | 20                  | 2859                                         | 357                                |                                   | 560                                     | 342                                            | 1.02                     | 348.43                         |                                |                    | 544.81                              | -196.38                        | -1296.62                         | -1493.00                      |
| 215              | 1972 | Liu Huaqing                       | 2               | poor peasant               | 15                    | 2                      | 1                     | 1                       | 6                              | 1                         | 2                         | 3                              | 56                                     | 122.8                     | 46.6                             | 169                    |                                      |                                      |                                         | 23                              |                                                       | 56                                       | 33.3                       | 1864.8                                        | 146                                            | 1                         | 146                                          |                     | 2011                                         | 335                                |                                   | 420                                     | 146                                            | 1.02                     | 149.33                         | 140.00                         |                    | 342.47                              | -53.14                         | -47.80                           | -100.94                       |
| 216              | 1972 | Meng Xiuying                      | 1               | poor peasant               | 24                    | 3                      | 1                     | 2                       | 4                              | 1                         |                           | 3                              | 38                                     | 550.1                     | 72.5                             | 623                    |                                      |                                      |                                         | 36                              |                                                       | 38                                       | 33.3                       | 1265.4                                        | 587                                            | 1                         | 587                                          | 50                  | 1902                                         | 476                                |                                   | 280                                     | 587                                            | 1.04                     | 610.06                         |                                |                    | 424.39                              | 185.67                         | 123.32                           | 308.99                        |

(cont.)

| Household number | Year | Name of the head of the household | Production team | Class status (1)         | Basic work points (2) | Total labor forces (3) | Male labor forces (4) | Female labor forces (5) | Total household population (6) | Age: 1 to 3 years old (7) | Age: 4 to 7 years old (8) | Age: 8 years old and above (9) | Work points of grain distribution (10) | Laboring work points (11) | Farmyard manure work points (12) | Total work points (13) | Work points of compulsory labor (14) | Work points of help cultivation (15) | Work points of private plots labor (16) | Total deducted work points (17) | Actual workdays of participation in distribution (18) | Workpoints for rations distribution (19) | Rations per workpoint (20) | Total rations received from distribution (21) | Workdays of participation in distribution (22) | Grains per workpoint (23) | Total grains distributed by work-points (24) | Grains subsidy (25) | Total Grains received from distribution (26) | Distributed grains per person (27) | Distributed grains per adult (28) | Grains received from private plots (29) | Workdays of participation in distribution (30) | Value per workpoint (31) | Total value of workpoints (32) | Money used for investment (33) | Sum of income (34) | Money distributed in this year (34) | Deposit/debt of this year (35) | Deposit/debt over the years (36) | Accumulated deposit/debt (37) |         |         |
|------------------|------|-----------------------------------|-----------------|--------------------------|-----------------------|------------------------|-----------------------|-------------------------|--------------------------------|---------------------------|---------------------------|--------------------------------|----------------------------------------|---------------------------|----------------------------------|------------------------|--------------------------------------|--------------------------------------|-----------------------------------------|---------------------------------|-------------------------------------------------------|------------------------------------------|----------------------------|-----------------------------------------------|------------------------------------------------|---------------------------|----------------------------------------------|---------------------|----------------------------------------------|------------------------------------|-----------------------------------|-----------------------------------------|------------------------------------------------|--------------------------|--------------------------------|--------------------------------|--------------------|-------------------------------------|--------------------------------|----------------------------------|-------------------------------|---------|---------|
| 217              | 1972 | Meng Peiliang                     | 2               | middle-class peasant     | 44                    | 5                      | 3                     | 3                       | 10                             | 1                         | 3                         | 6                              | 95                                     | 1201.3                    | 204.3                            | 1406                   |                                      |                                      |                                         | 81                              |                                                       | 95                                       | 33.3                       | 3163.5                                        | 1325                                           | 1                         | 1325                                         |                     | 4489                                         |                                    | 449                               |                                         | 700                                            | 1325                     | 1.02                           | 1351.50                        |                    |                                     | 978.66                         | 372.84                           | 246.72                        | 619.56  |         |
| 218              | 1972 | Meng Mingcheng                    | 2               | middle-class peasant     | 32                    | 4                      | 2                     | 2                       | 5                              |                           |                           | 5                              | 50                                     | 896.8                     | 93.7                             | 991                    |                                      |                                      |                                         | 48                              |                                                       | 50                                       | 33.3                       | 1665                                          | 943                                            | 1                         | 943                                          |                     | 2608                                         |                                    | 522                               |                                         | 350                                            | 943                      | 1.02                           | 961.35                         |                    |                                     | 510.11                         | 451.24                           | -178.70                       | 272.54  |         |
| 219              | 1972 | Wu Shi'en                         | 1               | poor peasant             | 22                    | 3                      | 1                     | 2                       | 6                              | 1                         | 1                         | 4                              | 57                                     | 519.0                     | 89.3                             | 608                    |                                      |                                      |                                         | 33                              |                                                       | 57                                       | 33.3                       | 1898.1                                        | 575                                            | 1                         | 575                                          |                     | 2473                                         |                                    | 412                               |                                         | 420                                            | 575                      | 1.04                           | 598.31                         |                    |                                     | 514.74                         | 83.57                            | -172.91                       | -89.34  |         |
| 220              | 1972 | Wang Qingwen                      | 1               | poor peasant             | 17                    | 2                      | 1                     | 1                       | 4                              |                           |                           | 4                              | 40                                     | 588.5                     | 126.6                            | 715                    |                                      |                                      |                                         | 26                              |                                                       | 40                                       | 33.3                       | 1332                                          | 689                                            | 1                         | 689                                          |                     | 2021                                         |                                    | 505                               |                                         | 280                                            | 689                      | 1.04                           | 716.66                         |                    |                                     | 671.82                         | 44.84                            | 248.73                        | 293.57  |         |
| 221              | 1972 | Ji Chunmei                        | 1               | poor peasant             |                       |                        |                       |                         | 1                              |                           |                           | 1                              | 10                                     |                           |                                  | 0                      |                                      |                                      |                                         |                                 | 10                                                    | 33.3                                     | 333                        |                                               | 0                                              | 1                         | 0                                            |                     | 333                                          |                                    | 333                               |                                         | 70                                             | 0                        | 1.04                           | 0.00                           | 100.00             |                                     |                                | 39.32                            | 60.68                         | -356.43 | -295.75 |
| 222              | 1972 | Li Yushu                          | 2               | poor peasant             | 10                    | 1                      | 1                     | 0                       | 3                              |                           | 1                         | 2                              | 29                                     | 395.1                     | 98.8                             | 494                    |                                      |                                      |                                         | 15                              |                                                       | 29                                       | 33.3                       | 965.7                                         | 479                                            | 1                         | 479                                          |                     | 1445                                         |                                    | 482                               |                                         | 210                                            | 479                      | 1.02                           | 488.48                         |                    |                                     | 383.34                         | 105.14                           | 214.38                        | 319.52  |         |
| 223              | 1972 | Yu Zhenji                         | 2               | poor peasant             | 10                    | 1                      | 1                     | 0                       | 1                              |                           |                           | 1                              | 10                                     | 262.6                     | 4                                | 267                    |                                      |                                      |                                         | 15                              |                                                       | 10                                       | 33.3                       | 333                                           |                                                | 1                         | 252                                          | 20                  | 605                                          |                                    | 605                               |                                         | 70                                             | 252                      | 1.02                           | 256.63                         |                    |                                     | 115.37                         | 141.26                           | -157.06                       | -15.80  |         |
| 224              | 1972 | Meng Jinxi                        | 0               | poor peasant             |                       |                        |                       |                         |                                |                           |                           |                                |                                        |                           |                                  | 0                      |                                      |                                      |                                         |                                 | 0                                                     | 33.3                                     | 0                          |                                               | 0                                              | 1                         | 0                                            |                     | 0                                            |                                    | #DIV/o!                           |                                         | 0                                              | 0                        | 1.04                           | 0.00                           |                    |                                     | 0.00                           |                                  | 0.00                          |         |         |
| 225              | 1972 | Li Guangkai                       | 0               | poor peasant             |                       |                        |                       |                         | 1                              |                           |                           | 1                              | 10                                     | 99.5                      |                                  | 100                    |                                      |                                      |                                         |                                 | 10                                                    | 33.3                                     | 333                        |                                               | 100                                            | 1                         | 100                                          |                     | 433                                          |                                    | 433                               |                                         | 70                                             | 100                      | 1.04                           | 103.48                         |                    |                                     | 142.91                         | -39.43                           | 112.85                        | 73.42   |         |
| 226              | 1972 | Liu Jigeng                        | 2               | poor peasant             | 21                    | 3                      | 2                     | 1                       | 6                              |                           | 1                         | 5                              | 59                                     | 1006.7                    | 86.4                             | 1093                   |                                      |                                      |                                         | 32                              |                                                       | 59                                       | 33.3                       | 2115                                          | 1061                                           | 1                         | 1061                                         |                     | 3176                                         |                                    | 529                               |                                         | 420                                            | 1061                     | 1.02                           | 1082.32                        |                    |                                     | 775.06                         | 307.26                           | 224.18                        | 531.44  |         |
| 227              | 1972 | Fan Shuzhi                        | 1               | middle-class peasant     | 14                    | 2                      | 1                     | 1                       | 6                              |                           |                           | 4                              | 57                                     | 223.9                     | 31.4                             | 255                    |                                      |                                      |                                         | 26                              |                                                       | 57                                       | 33.3                       | 1898.1                                        | 229                                            | 1                         | 229                                          |                     | 2127                                         |                                    | 355                               |                                         | 420                                            | 229                      | 1.04                           | 238.47                         |                    |                                     | 413.47                         | -175.00                          | -222.76                       | -397.76 |         |
| 228              | 1972 | Ji Guanglian                      | 1               | low-middle-class peasant | 7                     | 1                      | 0                     | 1                       | 4                              | 1                         | 1                         | 2                              | 37                                     |                           |                                  | 0                      |                                      |                                      |                                         | 11                              |                                                       | 37                                       | 33.3                       | 1232.1                                        | 0                                              | 1                         | 0                                            |                     | 1232                                         |                                    | 308                               |                                         | 280                                            | 0                        | 1.04                           | 0.00                           | 231.30             |                                     |                                | 199.76                           | 31.54                         | -13.53  | 18.01   |
| 229              | 1972 | Yang Xiaozhong                    | 1               | low-middle-class peasant | 17                    | 2                      | 1                     | 1                       | 4                              | 2                         |                           | 2                              | 36                                     | 425.4                     | 11.3                             | 437                    |                                      |                                      |                                         | 26                              |                                                       | 36                                       | 33.3                       | 1198.8                                        | 411                                            | 1                         | 411                                          | 50                  | 1571                                         |                                    | 393                               |                                         | 280                                            | 411                      | 1.04                           | 427.13                         |                    |                                     | 307.78                         | 119.35                           | 20.90                         | 140.25  |         |
| 230              | 1972 | Meng Minghong                     | 2               | middle-class peasant     | 17                    | 2                      | 1                     | 1                       | 4                              | 2                         |                           | 2                              | 36                                     | 486.8                     | 11.6                             | 498                    |                                      |                                      |                                         | 26                              |                                                       | 36                                       | 33.3                       | 1110                                          | 472                                            | 1                         | 472                                          | 100                 | 1682                                         |                                    | 421                               |                                         | 280                                            | 472                      | 1.02                           | 481.85                         |                    |                                     | 343.67                         | 138.18                           | 28.80                         | 166.98  |         |
| 231              | 1972 | Zhang Xuewen                      | 0               | poor peasant             |                       |                        |                       |                         |                                |                           |                           |                                |                                        |                           |                                  | 0                      |                                      |                                      |                                         |                                 | 0                                                     | 33.3                                     | 0                          |                                               | 0                                              | 1                         | 0                                            |                     | 0                                            |                                    | #DIV/o!                           |                                         | 0                                              | 0                        | 1.04                           | 0.00                           |                    |                                     | 0.00                           |                                  | 0.00                          |         |         |
| 232              | 1972 | Wu Jingxiu                        | 0               | middle-class peasant     |                       |                        |                       |                         |                                |                           |                           |                                |                                        |                           |                                  | 0                      |                                      |                                      |                                         |                                 | 0                                                     | 33.3                                     | 0                          |                                               | 0                                              | 1                         | 0                                            |                     | 0                                            |                                    | #DIV/o!                           |                                         | 0                                              | 0                        | 1.04                           | 0.00                           |                    |                                     | 0.00                           |                                  | 0.00                          |         |         |
| 233              | 1972 | Fan Shugen                        | 1               | middle-class peasant     | 17                    | 2                      | 1                     | 1                       | 3                              |                           |                           | 2                              | 28                                     | 510.5                     | 21.4                             | 532                    |                                      |                                      |                                         | 26                              |                                                       | 28                                       | 33.3                       | 982                                           | 506                                            | 1                         | 506                                          |                     | 1488                                         |                                    | 496                               |                                         | 210                                            | 506                      | 1.04                           | 526.14                         |                    |                                     | 353.84                         | 172.30                           | 83.66                         | 255.96  |         |
| 234              | 1972 | Yang Xiaoheng                     | 1               |                          |                       |                        |                       |                         | 1                              |                           |                           | 1                              | 10                                     |                           |                                  | 0                      |                                      |                                      |                                         |                                 | 10                                                    | 33.3                                     | 333                        |                                               | 0                                              | 1                         | 0                                            |                     | 333                                          |                                    | 333                               |                                         | 70                                             | 0                        | 1.04                           | 0.00                           |                    |                                     | 108.17                         | -108.17                          | 31.00                         | -77.17  |         |
| 235              | 1972 | Fan Xuewen                        | 1               |                          |                       |                        |                       |                         | 2                              |                           | 1                         | 1                              | 19                                     | 1.5                       | 62.4                             | 64                     |                                      |                                      |                                         |                                 | 19                                                    | 33.3                                     | 632.7                      | 64                                            | 1                                              | 64                        | 50                                           | 747                 |                                              | 373                                |                                   | 140                                     | 64                                             | 1.04                     | 66.46                          | 120.00                         |                    |                                     | 191.72                         | -5.26                            | -114.17                       | -119.43 |         |
| 236              | 1972 | Liu Yuzhen                        | 1               |                          | 20                    | 3                      | 1                     | 2                       | 7                              |                           | 1                         | 6                              | 69                                     | 581.1                     | 136.8                            | 718                    |                                      |                                      |                                         | 30                              |                                                       | 69                                       | 33.3                       | 2297.7                                        | 688                                            | 1                         | 688                                          |                     | 2986                                         |                                    | 427                               |                                         | 490                                            | 688                      | 1.04                           | 715.42                         |                    |                                     | 571.07                         | 144.35                           | 96.98                         | 241.33  |         |
| 237              | 1972 | Mu Chuncui                        | 1               | poor peasant             |                       |                        |                       |                         | 1                              |                           |                           | 1                              | 10                                     |                           |                                  | 0                      |                                      |                                      |                                         |                                 | 10                                                    | 33.3                                     | 333                        |                                               | 0                                              | 1                         | 0                                            |                     | 333                                          |                                    | 333                               |                                         | 70                                             | 0                        | 1.04                           | 0.00                           |                    |                                     | 0.00                           | -106.04                          | -106.04                       |         |         |
| 238              | 1972 | Meng Mingliang                    | 2               | poor peasant             |                       |                        |                       |                         | 1                              |                           |                           | 1                              | 10                                     | 216.0                     |                                  | 216                    |                                      |                                      |                                         |                                 | 10                                                    | 33.3                                     | 333                        |                                               | 216                                            | 1                         | 216                                          | 50                  | 599                                          |                                    | 599                               |                                         | 70                                             | 216                      | 1.04                           | 224.64                         |                    |                                     | 183.20                         | 41.44                            | 178.18                        | 219.62  |         |
| 239              | 1972 | Wang Guilan                       | 1               | poor peasant             | 3                     | 1                      | 0                     | 1                       | 1                              |                           |                           | 1                              | 10                                     | 203.3                     | 19.2                             | 223                    |                                      |                                      |                                         | 5                               |                                                       | 10                                       | 33.3                       | 333                                           |                                                | 218                       | 1                                            | 218                 |                                              | 551                                |                                   | 551                                     |                                                | 70                       | 218                            | 1.04                           | 226.20             |                                     |                                | 119.26                           | 106.94                        | 27.73   | 134.67  |
| 240              | 1972 | Wang Chuanxian                    | 1               | poor peasant             | 17                    | 2                      | 1                     | 1                       | 5                              | 1                         | 2                         | 2                              | 46                                     | 512.0                     |                                  | 512                    |                                      |                                      |                                         | 26                              |                                                       | 46                                       | 33.3                       | 1531.8                                        | 486                                            | 1                         | 486                                          |                     | 2018                                         |                                    | 404                               |                                         | 350                                            | 486                      | 1.04                           | 505.44                         |                    |                                     | 357.34                         | 148.10                           |                               | 148.10  |         |



(cont.)

| Household number | Year | Name of the head of the household | Production team | Class status (1)         | Basic work points (2) | Total labor forces (3) | Male labor forces (4) | Female labor forces (5) | Total household population (6) | Age: 1 to 3 years old (7) | Age: 4 to 7 years old (8) | Age: 8 years old and above (9) | Work points of grain distribution (10) | Laboring work points (11) | Farmyard manure work points (12) | Total work points (13) | Work points of compulsory labor (14) | Work points of help cultivation (15) | Work points of private plots labor (16) | Total deducted work points (17) | Actual workdays of participation in distribution (18) | Workpoints for rations distribution (19) | Rations per workpoint (20) | Total rations received from distribution (21) | Workdays of participation in distribution (22) | Grains per workpoint (23) | Total grains distributed by work-points (24) | Grains subsidy (25) | Total Grains received from distribution (26) | Distributed grains per person (27) | Distributed grains per adult (28) | Grains received from privated plots (29) | Workdays of participation in distribution (30) | Value per workpoint (31) | Total value of workpoints (32) | Money used for investment (33) | Sum of income (34) | Money distributed in this year (34) | Deposit/debt of this year (35) | Deposit/debt over the years (36) | Accumulated deposit/debt (37) |         |
|------------------|------|-----------------------------------|-----------------|--------------------------|-----------------------|------------------------|-----------------------|-------------------------|--------------------------------|---------------------------|---------------------------|--------------------------------|----------------------------------------|---------------------------|----------------------------------|------------------------|--------------------------------------|--------------------------------------|-----------------------------------------|---------------------------------|-------------------------------------------------------|------------------------------------------|----------------------------|-----------------------------------------------|------------------------------------------------|---------------------------|----------------------------------------------|---------------------|----------------------------------------------|------------------------------------|-----------------------------------|------------------------------------------|------------------------------------------------|--------------------------|--------------------------------|--------------------------------|--------------------|-------------------------------------|--------------------------------|----------------------------------|-------------------------------|---------|
| 241              | 1972 | Wang Zhenquan                     | 1               | poor peasant             |                       |                        |                       |                         | 3                              |                           |                           | 3                              | 30                                     | 362.7                     | 63                               | 426                    |                                      |                                      |                                         |                                 |                                                       | 30                                       | 33.3                       | 999                                           | 426                                            | 1                         | 426                                          |                     | 1425                                         |                                    | 475                               |                                          | 210                                            | 426                      | 1.04                           | 442.73                         |                    |                                     | 241.72                         | 201.01                           |                               | 201.01  |
| 243              | 1972 | Li Xiuying                        | 1               | poor peasant             |                       |                        |                       |                         |                                |                           |                           |                                |                                        |                           |                                  | 0                      |                                      |                                      |                                         |                                 |                                                       | 0                                        | 33.3                       | 150                                           | 0                                              | 1                         | 0                                            |                     | 150                                          |                                    |                                   |                                          | 0                                              | 0                        | 1.04                           | 0.00                           | 50.00              |                                     | 44.84                          | 5.16                             |                               | 5.16    |
| 244              | 1972 | Meng Jingxi                       | 1               | poor peasant             |                       |                        |                       |                         |                                |                           |                           |                                |                                        |                           |                                  | 0                      |                                      |                                      |                                         |                                 |                                                       | 0                                        | 33.3                       | 0                                             | 0                                              | 1                         | 0                                            |                     | 0                                            |                                    |                                   |                                          | 0                                              | 0                        | 1.04                           | 0.00                           | 523.27             |                                     | 3.14                           | 520.13                           | -522.27                       | -2.14   |
| 245              | 1972 | Cao Jinren                        | 1               | poor peasant             |                       |                        |                       |                         |                                |                           |                           |                                |                                        |                           |                                  | 0                      |                                      |                                      |                                         |                                 |                                                       | 0                                        | 33.3                       | 0                                             | 0                                              | 1                         | 0                                            |                     | 0                                            |                                    |                                   |                                          | 0                                              | 40                       | 1.04                           | 41.60                          |                    |                                     | 41.60                          |                                  | 41.60                         |         |
| 247              | 1972 | Wu Jinggui                        | 1               | poor peasant             |                       |                        |                       |                         |                                |                           |                           |                                |                                        |                           |                                  | 0                      |                                      |                                      |                                         |                                 |                                                       | 0                                        | 33.3                       | 0                                             | 0                                              | 1                         | 0                                            |                     | 0                                            |                                    |                                   |                                          | 0                                              | 450                      | 1.04                           | 468.00                         |                    |                                     | 468.00                         |                                  | 468.00                        |         |
| 248              | 1972 | Zhang Yucang                      | 1               |                          |                       |                        |                       |                         |                                |                           |                           |                                |                                        |                           |                                  | 0                      |                                      |                                      |                                         |                                 |                                                       | 0                                        | 33.3                       | 0                                             | 0                                              | 1                         | 0                                            |                     | 0                                            |                                    |                                   |                                          | 0                                              | 60                       | 1.04                           | 62.40                          |                    |                                     | 62.40                          |                                  | 62.40                         |         |
| 249              | 1972 | Zhang Lirong                      | 2               | poor peasant             | 10                    | 2                      | 0                     | 2                       | 3                              |                           |                           | 3                              | 30                                     | 397.3                     | 81.6                             | 479                    |                                      |                                      |                                         | 15                              |                                                       | 30                                       | 33.3                       | 999                                           | 464                                            | 1                         | 464                                          |                     | 1463                                         |                                    | 488                               |                                          | 210                                            | 464                      | 1.02                           | 473.18                         |                    |                                     | 276.94                         | 196.24                           | -49.38                        | 146.86  |
| 250              | 1972 | Zhang Liwen                       | 2               | poor peasant             | 17                    | 2                      | 1                     | 1                       | 4                              | 2                         |                           | 2                              | 36                                     | 317.3                     | 35                               | 352                    |                                      |                                      |                                         | 26                              |                                                       | 36                                       | 33.3                       | 1110                                          | 326                                            | 1                         | 326                                          |                     | 1436                                         |                                    | 359                               |                                          | 280                                            | 326                      | 1.02                           | 332.83                         |                    |                                     | 304.22                         | 28.61                            | 8.72                          | 37.33   |
| 251              | 1972 | Liu Ning                          | 2               |                          | 17                    | 2                      | 1                     | 1                       | 2                              |                           |                           | 2                              | 20                                     | 467.7                     | 9                                | 477                    |                                      |                                      |                                         | 26                              |                                                       | 20                                       | 33.3                       | 666                                           | 451                                            | 1                         | 451                                          | 20                  | 1137                                         |                                    | 568                               |                                          | 140                                            | 451                      | 1.02                           | 459.71                         |                    |                                     | 196.87                         | 262.84                           |                               | 262.84  |
| 252              | 1972 | Niu Lanmei                        | 2               | poor peasant             | 7                     | 1                      | 0                     | 1                       | 2                              | 1                         |                           | 1                              | 18                                     |                           |                                  | 0                      |                                      |                                      | 11                                      |                                 | 18                                                    | 33.3                                     | 449                        |                                               | 1                                              | 0                         |                                              | 449                 |                                              | 225                                |                                   | 140                                      | 0                                              | 1.02                     | 0.00                           |                                |                    | 57.25                               | -57.25                         |                                  | -57.25                        |         |
| 253              | 1972 | Meng Minglu                       | 2               | low-middle-class peasant | 37                    | 4                      | 3                     | 1                       | 6                              |                           |                           | 6                              | 60                                     | 1158.2                    | 99.8                             | 1258                   |                                      |                                      |                                         | 56                              |                                                       | 60                                       | 33.3                       | 1998                                          | 1202                                           | 1                         | 1202                                         | 20                  | 3220                                         |                                    | 537                               |                                          | 420                                            | 1202                     | 1.02                           | 1226.04                        |                    |                                     | 895.64                         | 330.40                           | 702.66                        | 1033.06 |
| 256              | 1972 | Cui Yongfu                        | 2               | poor peasant             |                       |                        |                       |                         |                                |                           |                           |                                |                                        |                           |                                  | 0                      |                                      |                                      |                                         |                                 |                                                       | 0                                        | 33.3                       | 0                                             | 0                                              | 1                         | 0                                            |                     | 0                                            |                                    |                                   |                                          | 0                                              | 350                      | 1.02                           | 357.00                         |                    |                                     | 357.00                         |                                  | 357.00                        |         |
| 1                | 1973 | Meng Tianyun                      | 2               | poor peasant             | 6.5                   | 2                      | 0                     | 2                       | 7                              | 1                         | 1                         | 5                              | 61                                     |                           |                                  | 589                    |                                      |                                      |                                         | 16                              |                                                       | 61                                       | 3.57                       | 2277.7                                        | 573                                            | 0.91                      | 539                                          |                     | 2797.7                                       |                                    | 400                               |                                          |                                                | 573                      | 1.02                           | 584.46                         |                    |                                     | 466.93                         | 117.53                           | 142.19                        | 259.72  |
| 2                | 1973 | Yang Fengming                     | 1               | middle-class peasant     | 10.5                  | 2                      | 1                     | 1                       | 2                              |                           |                           | 2                              | 20                                     |                           |                                  | 300                    |                                      |                                      |                                         | 26                              |                                                       | 20                                       | 3.57                       | 714                                           | 274                                            | 0.94                      | 258                                          |                     | 971.56                                       |                                    | 485.78                            |                                          |                                                | 274                      | 1.05                           | 287.70                         |                    |                                     | 224.32                         | 63.38                            | 138.99                        | 202.37  |
| 3                | 1973 | Li Chengxin                       | 1               | poor peasant             | 32                    | 4                      | 3                     | 1                       | 8                              |                           |                           | 8                              | 80                                     |                           |                                  | 1444                   |                                      |                                      |                                         | 80                              |                                                       | 80                                       | 3.57                       | 2856                                          | 1364                                           | 0.94                      | 1282                                         |                     | 4138.16                                      |                                    | 517.27                            |                                          |                                                | 1364                     | 1.05                           | 1432.20                        |                    |                                     | 813.30                         | 618.90                           | -417.34                       | 201.56  |
| 4                | 1973 | Li Zeying                         | 1               | poor peasant             |                       |                        |                       |                         | 1                              |                           |                           | 1                              | 10                                     |                           |                                  | 7                      |                                      |                                      |                                         |                                 |                                                       | 10                                       | 3.57                       | 357                                           | 7                                              | 0.94                      | 7                                            |                     | 363.58                                       |                                    | 363.58                            |                                          |                                                | 7                        | 1.05                           | 7.35                           |                    |                                     | 75.17                          | -67.82                           | -77.17                        | -144.99 |
| 5                | 1973 | Gao Peizhong                      | 1               | poor peasant             | 14                    | 2                      | 1                     | 1                       | 8                              | 1                         | 1                         | 6                              | 69                                     |                           |                                  | 377                    |                                      |                                      |                                         | 35                              |                                                       | 69                                       | 3.57                       | 2463.3                                        | 342                                            | 0.94                      | 321                                          |                     | 2784.78                                      |                                    | 348.0975                          |                                          |                                                | 342                      | 1.05                           | 359.10                         |                    |                                     | 579.22                         | -220.12                          | -450.19                       | -670.31 |
| 6                | 1973 | Kong Qingquan                     | 1               | poor peasant             | 8                     | 2                      | 0                     | 2                       | 5                              |                           |                           | 5                              | 50                                     |                           |                                  | 611                    |                                      |                                      |                                         | 20                              |                                                       | 50                                       | 3.57                       | 1785                                          | 591                                            | 0.94                      | 556                                          |                     | 2340.54                                      |                                    | 468.108                           |                                          |                                                | 591                      | 1.05                           | 620.55                         |                    |                                     | 500.28                         | 120.27                           | 311.30                        | 431.57  |
| 7                | 1973 | Li Chengren                       | 1               | middle-class peasant     |                       |                        |                       |                         | 2                              |                           |                           | 2                              | 20                                     |                           |                                  | 71                     |                                      |                                      |                                         |                                 |                                                       | 20                                       | 3.57                       | 714                                           | 71                                             | 0.94                      | 67                                           |                     | 780.74                                       |                                    | 390.37                            |                                          |                                                | 71                       | 1.05                           | 74.55                          |                    |                                     | 155.09                         | -80.54                           | -232.33                       | -312.87 |
| 8                | 1973 | Wu Jixiang                        | 1               | middle-class peasant     | 4                     | 1                      | 0                     | 1                       | 5                              |                           | 2                         | 3                              | 44                                     |                           |                                  | 170                    |                                      |                                      |                                         | 10                              |                                                       | 44                                       | 3.57                       | 1570.8                                        | 160                                            | 0.94                      | 150                                          |                     | 1721.2                                       |                                    | 344.24                            |                                          |                                                | 160                      | 1.05                           | 168.00                         | 190.00             |                                     | 275.13                         | 82.87                            | -17.00                        | 65.87   |
| 9                | 1973 | Kong Fangyu                       | 1               | poor peasant             | 4                     | 1                      | 0                     | 1                       | 2                              |                           | 1                         | 1                              | 17                                     |                           |                                  | 138                    |                                      |                                      |                                         | 10                              |                                                       | 17                                       | 3.57                       | 606.9                                         | 128                                            | 0.94                      | 120                                          | 30                  | 757.22                                       |                                    | 378.61                            |                                          |                                                | 128                      | 1.05                           | 134.40                         | 90.00              |                                     | 118.07                         | 106.33                           | -57.39                        | 48.94   |
| 10               | 1973 | Gao Wei                           | 1               | poor peasant             | 16.5                  | 3                      | 1                     | 2                       | 4                              |                           |                           | 4                              | 40                                     |                           |                                  | 743                    |                                      |                                      |                                         | 41                              |                                                       | 40                                       | 3.57                       | 1428                                          | 702                                            | 0.94                      | 660                                          |                     | 2087.88                                      |                                    | 521.97                            |                                          |                                                | 702                      | 1.05                           | 737.10                         |                    |                                     | 603.90                         | 133.20                           | 534.64                        | 667.84  |
| 11               | 1973 | Gao Jun                           | 1               | poor peasant             |                       |                        |                       |                         | 1                              |                           |                           | 1                              | 10                                     |                           |                                  | 147                    |                                      |                                      |                                         |                                 |                                                       | 10                                       | 3.57                       | 357                                           | 147                                            | 0.94                      | 138                                          |                     | 495.18                                       |                                    | 495.18                            |                                          |                                                | 147                      | 1.05                           | 154.35                         |                    |                                     | 109.48                         | 44.87                            | 89.87                         | 134.74  |
| 12               | 1973 | Gao Peixiao                       | 1               | poor peasant             | 14                    | 2                      | 1                     | 1                       | 5                              | 1                         | 2                         | 2                              | 38                                     |                           |                                  | 898                    |                                      |                                      |                                         | 35                              |                                                       | 38                                       | 3.57                       | 1356.6                                        | 863                                            | 0.94                      | 811                                          | 20                  | 2187.82                                      |                                    | 437.564                           |                                          |                                                | 863                      | 1.05                           | 906.15                         |                    |                                     | 518.09                         | 388.06                           | 149.28                        | 537.34  |
| 13               | 1973 | Gao Shang                         | 1               | poor peasant             |                       |                        |                       |                         |                                |                           |                           |                                |                                        |                           |                                  |                        |                                      |                                      |                                         |                                 |                                                       | 0                                        | 3.57                       | 0                                             | 0                                              | 0.94                      | 0                                            |                     | 0                                            |                                    |                                   |                                          | 0                                              | 1.05                     | 0.00                           | 171.92                         |                    |                                     | 171.92                         |                                  | 171.92                        |         |
| 14               | 1973 | Mu Zhaolin                        | 1               | poor peasant             | 14                    | 2                      | 1                     | 1                       | 5                              | 1                         | 1                         | 3                              | 41                                     |                           |                                  | 785                    |                                      |                                      |                                         | 35                              |                                                       | 41                                       | 3.57                       | 1463.7                                        | 750                                            | 0.94                      | 705                                          | 20                  | 2188.7                                       |                                    | 437.74                            |                                          |                                                | 750                      | 1.05                           | 787.50                         |                    |                                     | 493.99                         | 293.51                           | 160.31                        | 453.82  |
| 15               | 1973 | Cao Cuizhen                       | 2               | poor peasant             | 22.5                  | 3                      | 2                     | 1                       | 6                              |                           |                           | 6                              | 60                                     |                           |                                  | 1012                   |                                      |                                      |                                         | 56                              |                                                       | 60                                       | 3.57                       | 2142                                          | 956                                            | 0.91                      | 870                                          |                     | 3011.96                                      |                                    | 501.9933333                       |                                          |                                                | 956                      | 1.02                           | 975.12                         |                    |                                     | 705.53                         | 269.59                           | 523.11                        | 792.70  |
| 16               | 1973 | Cao Jianren                       | 2               | poor peasant             | 14                    | 2                      | 1                     | 1                       | 6                              | 1                         | 2                         | 3                              | 48                                     |                           |                                  | 794                    |                                      |                                      |                                         | 35                              |                                                       | 48                                       | 3.57                       | 1713.6                                        | 759                                            | 0.91                      | 691                                          | 20                  | 2424.29                                      |                                    | 404.0483333                       |                                          |                                                | 759                      | 1.02                           | 774.18                         |                    |                                     | 774.18                         |                                  |                               | 774.18  |



(cont.)

| Household number | Year | Name of the head of the household | Production team | Class status (1)         | Basic work points (2) | Total labor forces (3) | Male labor forces (4) | Female labor forces (5) | Total household population (6) | Age: 1 to 3 years old (7) | Age: 4 to 7 years old (8) | Age: 8 years old and above (9) | Work points of grain distribution (10) | Laboring work points (11) | Farmyard work points (12) | Total work points (13) | Work points of compulsory labor (14) | Work points of help cultivation (15) | Work points of private plots labor (16) | Total deducted work points (17) | Actual workdays of participation in distribution (18) | Workpoints for rations distribution (19) | Rations per workpoint (20) | Total rations received from distribution (21) | Workdays of participation in distribution (22) | Grains per workpoint (23) | Total grains distributed by work-points (24) | Grains subsidy (25) | Total Grains received from distribution (26) | Distributed grains per person (27) | Distributed grains per adult (28) | Grains received from privated plots (29) | Workdays of participation in distribution (30) | Value per workpoint (31) | Total value of workpoints (32) | Money used for investment (33) | Sum of income (34) | Money distributed in this year (34) | Deposit/ debt of this year (35) | Deposit/ debt over the years (36) | Accumulated deposit/debt (37) |
|------------------|------|-----------------------------------|-----------------|--------------------------|-----------------------|------------------------|-----------------------|-------------------------|--------------------------------|---------------------------|---------------------------|--------------------------------|----------------------------------------|---------------------------|---------------------------|------------------------|--------------------------------------|--------------------------------------|-----------------------------------------|---------------------------------|-------------------------------------------------------|------------------------------------------|----------------------------|-----------------------------------------------|------------------------------------------------|---------------------------|----------------------------------------------|---------------------|----------------------------------------------|------------------------------------|-----------------------------------|------------------------------------------|------------------------------------------------|--------------------------|--------------------------------|--------------------------------|--------------------|-------------------------------------|---------------------------------|-----------------------------------|-------------------------------|
| 17               | 1973 | Liu Guiwu                         | 1               | poor peasant             |                       |                        |                       |                         |                                |                           |                           |                                |                                        |                           |                           |                        |                                      |                                      |                                         |                                 |                                                       | 0                                        | 3.57                       | 0                                             | 0                                              | 0.94                      | 0                                            | 0                   |                                              |                                    |                                   | 0                                        | 1.05                                           | 0.00                     | 2.53                           |                                |                    | 2.53                                | 2.53                            |                                   |                               |
| 18               | 1973 | Meng Mingde                       | 1               | poor peasant             | 24.5                  | 4                      | 2                     | 2                       | 8                              |                           | 1                         | 7                              | 77                                     |                           |                           |                        | 1006                                 |                                      |                                         |                                 | 61                                                    | 77                                       | 3.57                       | 2748.9                                        | 945                                            | 0.94                      | 888                                          | 3637.2              | 454.65                                       |                                    | 945                               | 1.05                                     | 992.25                                         |                          |                                | 841.17                         | 151.08             | 601.00                              | 752.08                          |                                   |                               |
| 19               | 1973 | Mu Shouliang                      | 1               | poor peasant             |                       |                        |                       |                         | 2                              |                           |                           | 2                              | 20                                     |                           |                           |                        |                                      |                                      |                                         |                                 | 20                                                    | 3.57                                     | 714                        | 0                                             | 0.94                                           | 0                         | 714                                          | 357                 |                                              | 0                                  | 1.05                              | 0.00                                     | 70.00                                          |                          |                                | 134.34                         | -64.34             | -171.58                             | -235.92                         |                                   |                               |
| 20               | 1973 | Meng Mingbao                      | 1               | poor peasant             | 34.5                  | 5                      | 3                     | 2                       | 6                              | 1                         |                           | 5                              | 54                                     |                           |                           |                        | 1215                                 |                                      |                                         |                                 | 86                                                    | 54                                       | 3.57                       | 1927.8                                        | 1129                                           | 0.94                      | 1061                                         | 2989.06             | 498.1766667                                  |                                    | 1129                              | 1.05                                     | 1185.45                                        |                          |                                | 758.63                         | 426.82             | 422.70                              | 849.52                          |                                   |                               |
| 21               | 1973 | Meng Mingjin                      | 1               | poor peasant             | 2.5                   |                        |                       |                         | 2                              |                           |                           | 2                              | 20                                     |                           |                           |                        | 438                                  |                                      |                                         |                                 | 6                                                     | 20                                       | 3.57                       | 714                                           | 432                                            | 0.94                      | 406                                          | 1120.08             | 560.04                                       |                                    | 432                               | 1.05                                     | 453.60                                         |                          |                                | 333.44                         | 120.16             | 166.54                              | 286.70                          |                                   |                               |
| 22               | 1973 | Liang Shiren                      | 1               | low-middle-class peasant |                       |                        |                       |                         | 2                              |                           |                           | 2                              | 20                                     |                           |                           |                        | 53                                   |                                      |                                         |                                 | 20                                                    | 3.57                                     | 714                        | 53                                            | 0.94                                           | 50                        | 763.82                                       | 381.91              |                                              | 53                                 | 1.05                              | 55.65                                    |                                                |                          | 131.84                         | -76.19                         | -269.53            | -345.72                             |                                 |                                   |                               |
| 23               | 1973 | Liang Yingfu                      | 1               | low-middle-class peasant | 10                    | 1                      | 1                     | 0                       | 4                              |                           |                           | 4                              | 40                                     |                           |                           |                        | 580                                  |                                      |                                         |                                 | 25                                                    | 40                                       | 3.57                       | 1428                                          | 555                                            | 0.94                      | 522                                          | 20                  | 1969.7                                       | 492.425                            |                                   | 555                                      | 1.05                                           | 582.75                   |                                |                                | 365.94             | 216.81                              | -244.53                         | -27.72                            |                               |
| 24               | 1973 | Lei Guangzhi                      | 1               | low-middle-class peasant | 8                     | 1                      | 1                     | 0                       | 2                              |                           |                           | 2                              | 20                                     |                           |                           |                        | 215                                  |                                      |                                         |                                 | 20                                                    | 20                                       | 3.57                       | 714                                           | 195                                            | 0.94                      | 183                                          | 897.3               | 448.65                                       |                                    | 195                               | 1.05                                     | 204.75                                         |                          |                                | 182.17                         | 22.58              | -625.20                             | -602.62                         |                                   |                               |
| 25               | 1973 | Fan Lishi                         | 1               | middle-class peasant     | 20.5                  | 3                      | 2                     | 1                       | 7                              |                           |                           | 7                              | 70                                     |                           |                           |                        | 1051                                 |                                      |                                         |                                 | 51                                                    | 70                                       | 3.57                       | 2499                                          | 1000                                           | 0.94                      | 940                                          | 3439                | 491.2857143                                  |                                    | 1000                              | 1.05                                     | 1050.00                                        |                          |                                | 894.52                         | 155.48             | 544.16                              | 699.64                          |                                   |                               |
| 26               | 1973 | Zhang Quangui                     | 2               | middle-class peasant     |                       |                        |                       |                         | 1                              |                           |                           | 1                              | 10                                     |                           |                           |                        | 23                                   |                                      |                                         |                                 | 10                                                    | 3.57                                     | 357                        | 23                                            | 0.91                                           | 21                        | 377.93                                       | 377.93              |                                              | 23                                 | 1.02                              | 23.46                                    | 100.00                                         |                          |                                | 66.25                          | 57.21              | -216.74                             | -159.53                         |                                   |                               |
| 27               | 1973 | Wang Bangjie                      | 1               | low-middle-class peasant | 14                    | 2                      | 1                     | 1                       | 4                              | 1                         |                           | 3                              | 34                                     |                           |                           |                        | 622                                  |                                      |                                         |                                 | 35                                                    | 34                                       | 3.57                       | 1213.8                                        | 587                                            | 0.94                      | 552                                          | 30                  | 1795.58                                      | 448.895                            |                                   | 587                                      | 1.05                                           | 616.35                   |                                |                                | 415.56             | 200.79                              | -12.13                          | 188.66                            |                               |
| 28               | 1973 | Meng Tianxing                     | 1               | low-middle-class peasant | 14                    | 2                      | 1                     | 1                       | 6                              | 1                         | 1                         | 4                              | 51                                     |                           |                           |                        | 612                                  |                                      |                                         |                                 | 35                                                    | 51                                       | 3.57                       | 1820.7                                        | 577                                            | 0.94                      | 542                                          | 20                  | 2383.08                                      | 397.18                             |                                   | 577                                      | 1.05                                           | 605.85                   |                                |                                | 455.33             | 150.52                              | -145.35                         | 5.17                              |                               |
| 29               | 1973 | Xue Baolin                        | 1               | low-middle-class peasant | 4                     | 1                      | 0                     | 1                       | 5                              |                           | 2                         | 3                              | 44                                     |                           |                           |                        | 12                                   |                                      |                                         |                                 | 10                                                    | 44                                       | 3.57                       | 1570.8                                        | 2                                              | 0.94                      | 2                                            | 1572.68             | 314.536                                      |                                    | 2                                 | 1.05                                     | 2.10                                           | 240.00                   |                                |                                | 256.26             | -14.16                              | 20.08                           | 5.92                              |                               |
| 30               | 1973 | Cao Cuiheng                       | 1               | low-middle-class peasant | 2.5                   | 1                      | 0                     | 1                       | 2                              |                           |                           | 2                              | 20                                     |                           |                           |                        | 276                                  |                                      |                                         |                                 | 6                                                     | 20                                       | 3.57                       | 714                                           | 270                                            | 0.94                      | 254                                          | 967.8               | 483.9                                        |                                    | 270                               | 1.05                                     | 283.50                                         |                          |                                | 224.00                         | 59.50              | 202.91                              | 262.41                          |                                   |                               |
| 31               | 1973 | Ma Hongxiang                      | 1               | low-middle-class peasant | 4                     | 1                      | 0                     | 1                       | 3                              | 1                         | 1                         | 1                              | 21                                     |                           |                           |                        | 129                                  |                                      |                                         |                                 | 10                                                    | 21                                       | 3.57                       | 749.7                                         | 119                                            | 0.94                      | 112                                          | 60                  | 921.56                                       | 307.1866667                        |                                   | 119                                      | 1.05                                           | 124.95                   |                                |                                | 141.56             | -16.61                              | 53.40                           | 36.79                             |                               |
| 32               | 1973 | Ruan Baorong                      | 1               | low-middle-class peasant | 18                    | 3                      | 1                     | 2                       | 5                              |                           |                           | 5                              | 50                                     |                           |                           |                        | 1034                                 |                                      |                                         |                                 | 45                                                    | 50                                       | 3.57                       | 1785                                          | 989                                            | 0.94                      | 930                                          | 2714.66             | 542.932                                      |                                    | 989                               | 1.05                                     | 1038.45                                        |                          |                                | 921.12                         | 117.33             | 874.30                              | 991.63                          |                                   |                               |
| 33               | 1973 | Cao Qiguo                         | 1               | low-middle-class peasant | 14                    | 2                      | 1                     | 1                       | 7                              | 1                         | 2                         | 4                              | 58                                     |                           |                           |                        | 585                                  |                                      |                                         |                                 | 35                                                    | 58                                       | 3.57                       | 2070.6                                        | 550                                            | 0.94                      | 517                                          | 100                 | 2687.6                                       | 383.9428571                        |                                   | 550                                      | 1.05                                           | 577.50                   |                                |                                | 505.62             | 71.88                               | -93.67                          | -21.79                            |                               |
| 34               | 1973 | Liu Jinliang                      | 1               | poor peasant             | 16.5                  | 3                      | 1                     | 2                       | 8                              | 1                         |                           | 7                              | 74                                     |                           |                           |                        | 1180                                 |                                      |                                         |                                 | 41                                                    | 74                                       | 3.57                       | 2641.8                                        | 1139                                           | 0.94                      | 1071                                         | 20                  | 3732.46                                      | 466.5575                           |                                   | 1139                                     | 1.05                                           | 1195.95                  |                                |                                | 818.08             | 377.87                              | 365.53                          | 743.40                            |                               |
| 35               | 1973 | Shi Baoshou                       | 1               | low-middle-class peasant | 16                    | 3                      | 1                     | 2                       | 8                              | 1                         | 1                         | 6                              | 69                                     |                           |                           |                        | 668                                  |                                      |                                         |                                 | 40                                                    | 69                                       | 3.57                       | 2463.3                                        | 628                                            | 0.94                      | 590                                          | 3053.62             | 381.7025                                     |                                    | 628                               | 1.05                                     | 659.40                                         |                          |                                | 594.93                         | 64.47              | -1112.10                            | -1047.63                        |                                   |                               |

(cont.)

| Household number | Year | Name of the head of the household | Production team | Class status (1)           | Basic work points (2) | Total labor forces (3) | Male labor forces (4) | Female labor forces (5) | Total household population (6) | Age: 1 to 3 years old (7) | Age: 4 to 7 years old (8) | Age: 8 years old and above (9) | Work points of grain distribution (10) | Laboring work points (11) | Farmyard manure work points (12) | Total work points (13) | Work points of compulsory labor (14) | Work points of help cultivation (15) | Work points of private plots labor (16) | Total deducted work points (17) | Actual workdays of participation in distribution (18) | Workpoints for rations distribution (19) | Rations per workpoint (20) | Total rations received from distribution (21) | Workdays of participation in distribution (22) | Grains per workpoint (23) | Total grains distributed by work-points (24) | Grains subsidy (25) | Total Grains received from distribution (26) | Distributed grains per person (27) | Distributed grains per adult (28) | Grains received from private plots (29) | Workdays of participation in distribution (30) | Value per workpoint (31) | Total value of workpoints (32) | Money used for investment (33) | Sum of income (34) | Money distributed in this year (34) | Deposit/debt of this year (35) | Deposit/debt over the years (36) | Accumulated deposit/debt (37) |
|------------------|------|-----------------------------------|-----------------|----------------------------|-----------------------|------------------------|-----------------------|-------------------------|--------------------------------|---------------------------|---------------------------|--------------------------------|----------------------------------------|---------------------------|----------------------------------|------------------------|--------------------------------------|--------------------------------------|-----------------------------------------|---------------------------------|-------------------------------------------------------|------------------------------------------|----------------------------|-----------------------------------------------|------------------------------------------------|---------------------------|----------------------------------------------|---------------------|----------------------------------------------|------------------------------------|-----------------------------------|-----------------------------------------|------------------------------------------------|--------------------------|--------------------------------|--------------------------------|--------------------|-------------------------------------|--------------------------------|----------------------------------|-------------------------------|
| 36               | 1973 | Wang Qiding                       | 2               | low-middle-class peasant   | 12.5                  | 2                      | 1                     | 1                       | 2                              |                           |                           | 2                              | 20                                     |                           |                                  |                        | 179                                  |                                      |                                         | 31                              |                                                       | 20                                       | 3.57                       | 714                                           | 148                                            | 0.91                      | 135                                          |                     | 848.68                                       | 424.34                             |                                   |                                         | 148                                            | 1.02                     | 150.96                         |                                | 183.05             | -32.09                              | 103.19                         | 71.10                            |                               |
| 37               | 1973 | Yu Zhankui                        | 1               | poor peasant               | 4                     | 1                      | 0                     | 1                       | 5                              | 1                         | 2                         | 2                              | 36                                     |                           |                                  |                        | 72                                   |                                      |                                         | 10                              |                                                       | 36                                       | 3.57                       | 1285.2                                        | 62                                             | 0.94                      | 58                                           |                     | 1343.48                                      | 268.696                            |                                   |                                         | 62                                             | 1.05                     | 65.10                          | 110.00                         | 245.86             | -70.76                              | -326.58                        | -397.34                          |                               |
| 38               | 1973 | Liu Yucan                         | 1               | poor peasant               | 14                    | 2                      | 1                     | 1                       | 6                              | 1                         | 2                         | 3                              | 48                                     |                           |                                  |                        | 476                                  |                                      |                                         | 10                              |                                                       | 48                                       | 3.57                       | 1713.6                                        | 466                                            | 0.94                      | 438                                          | 50                  | 2201.64                                      | 366.94                             |                                   |                                         | 466                                            | 1.05                     | 489.30                         |                                | 500.07             | -10.77                              | -261.41                        | -272.18                          |                               |
| 39               | 1973 | Liu Guiting                       | 1               | middle-class peasant       |                       |                        |                       |                         | 3                              |                           |                           | 3                              | 30                                     |                           |                                  |                        | 492                                  |                                      |                                         |                                 |                                                       | 30                                       | 3.57                       | 1071                                          | 492                                            | 0.94                      | 462                                          |                     | 1533.48                                      | 511.16                             |                                   |                                         | 492                                            | 1.05                     | 516.60                         |                                | 405.25             | 111.35                              | 248.48                         | 359.83                           |                               |
| 40               | 1973 | Liu Chengze                       | 1               | middle-class peasant       |                       |                        |                       |                         | 1                              |                           |                           | 1                              | 10                                     |                           |                                  |                        | 120                                  |                                      |                                         |                                 |                                                       | 10                                       | 3.57                       | 357                                           | 120                                            | 0.94                      | 113                                          |                     | 469.8                                        | 469.8                              |                                   |                                         | 120                                            | 1.05                     | 126.00                         |                                | 125.94             | 0.06                                | 96.93                          | 96.99                            |                               |
| 41               | 1973 | Li Jinhu                          | 1               | middle-class peasant       | 10                    | 1                      | 1                     | 0                       | 3                              |                           |                           | 3                              | 30                                     |                           |                                  |                        | 562                                  |                                      |                                         | 25                              |                                                       | 30                                       | 3.57                       | 1071                                          | 537                                            | 0.94                      | 505                                          |                     | 1575.78                                      | 525.26                             |                                   |                                         | 537                                            | 1.05                     | 563.85                         |                                | 378.45             | 185.40                              | 235.43                         | 420.83                           |                               |
| 42               | 1973 | Meng Xiqing                       | 2               | poor peasant               | 22                    | 2                      | 1                     | 1                       | 7                              |                           | 2                         | 5                              | 64                                     |                           |                                  |                        | 983                                  |                                      |                                         | 55                              |                                                       | 64                                       | 3.57                       | 2284.8                                        | 928                                            | 0.91                      | 844                                          |                     | 3129.28                                      | 447.04                             |                                   |                                         | 928                                            | 1.02                     | 946.56                         |                                | 599.21             | 347.35                              | -196.97                        | 150.38                           |                               |
| 43               | 1973 | Li Shucheng                       | 1               | poor peasant               | 22                    | 3                      | 2                     | 1                       | 6                              |                           | 1                         | 5                              | 57                                     |                           |                                  |                        | 1204                                 |                                      |                                         | 55                              |                                                       | 57                                       | 3.57                       | 2034.9                                        | 1149                                           | 0.94                      | 1080                                         |                     | 3114.96                                      | 519.16                             |                                   |                                         | 1149                                           | 1.05                     | 1206.45                        |                                | 836.64             | 369.81                              | 437.83                         | 807.64                           |                               |
| 44               | 1973 | Wang Guiying                      | 1               | low-middle-class peasant   | 18                    | 3                      | 1                     | 2                       | 4                              | 1                         |                           | 3                              | 34                                     |                           |                                  |                        | 656                                  |                                      |                                         | 45                              |                                                       | 34                                       | 3.57                       | 1213.8                                        | 611                                            | 0.94                      | 574                                          |                     | 1788.14                                      | 447.035                            |                                   |                                         | 611                                            | 1.05                     | 641.55                         |                                | 393.34             | 248.21                              | 152.48                         | 400.69                           |                               |
| 45               | 1973 | Zuo Yunxian                       | 1               | upper-middle-class peasant | 32                    | 5                      | 2                     | 3                       | 10                             | 1                         |                           | 9                              | 94                                     |                           |                                  |                        | 1465                                 |                                      |                                         | 80                              |                                                       | 94                                       | 3.57                       | 3355.8                                        | 1385                                           | 0.94                      | 1302                                         | 20                  | 4677.7                                       | 467.77                             |                                   |                                         | 1385                                           | 1.05                     | 1454.25                        |                                | 1117.27            | 336.98                              | 873.44                         | 1210.42                          |                               |
| 46               | 1973 | Gao Peijie                        | 1               | poor peasant               | 10                    | 1                      | 1                     | 0                       | 2                              |                           |                           | 2                              | 20                                     |                           |                                  |                        | 351                                  |                                      |                                         | 25                              |                                                       | 20                                       | 3.57                       | 714                                           | 326                                            | 0.94                      | 306                                          |                     | 1020.44                                      | 510.22                             |                                   |                                         | 326                                            | 1.05                     | 342.30                         |                                | 234.59             | 107.71                              | 47.99                          | 155.70                           |                               |
| 47               | 1973 | Wang Qisheng                      | 1               | poor peasant               | 10.5                  | 2                      | 1                     | 1                       | 6                              | 1                         | 1                         | 4                              | 51                                     |                           |                                  |                        | 483                                  |                                      |                                         | 26                              |                                                       | 51                                       | 3.57                       | 1820.7                                        | 457                                            | 0.94                      | 430                                          |                     | 2250.28                                      | 375.0466667                        |                                   |                                         | 457                                            | 1.05                     | 479.85                         |                                | 432.61             | 47.24                               | -636.42                        | -589.18                          |                               |
| 48               | 1973 | Chen Yuzhong                      | 2               | poor peasant               | 18                    | 3                      | 1                     | 2                       | 6                              |                           |                           | 6                              | 60                                     |                           |                                  |                        | 876                                  |                                      |                                         | 45                              |                                                       | 60                                       | 3.57                       | 2142                                          | 831                                            | 0.91                      | 756                                          |                     | 2898.21                                      | 483.035                            |                                   |                                         | 831                                            | 1.02                     | 847.62                         |                                | 504.14             | 343.48                              | -291.86                        | 51.62                            |                               |
| 49               | 1973 | Meng Tianchang                    | 2               | poor peasant               | 14                    | 2                      | 1                     | 1                       | 5                              | 1                         | 2                         | 2                              | 38                                     |                           |                                  |                        | 414                                  |                                      |                                         | 35                              |                                                       | 38                                       | 3.57                       | 1356.6                                        | 379                                            | 0.91                      | 345                                          |                     | 1701.49                                      | 340.298                            |                                   |                                         | 379                                            | 1.02                     | 386.58                         |                                | 378.39             | 8.19                                | -118.28                        | -110.09                          |                               |
| 50               | 1973 | Wang Xizhi                        | 2               | middle-class peasant       | 13                    | 3                      | 1                     | 2                       | 5                              |                           |                           | 5                              | 50                                     |                           |                                  |                        | 666                                  |                                      |                                         | 33                              |                                                       | 50                                       | 3.57                       | 1785                                          | 633                                            | 0.91                      | 576                                          |                     | 2361.03                                      | 472.206                            |                                   |                                         | 633                                            | 1.02                     | 645.66                         |                                | 502.53             | 143.13                              | 54.26                          | 197.39                           |                               |
| 51               | 1973 | Jia Jinkui                        | 2               | low-middle-class peasant   |                       |                        |                       |                         |                                |                           |                           |                                |                                        |                           |                                  |                        |                                      |                                      |                                         |                                 |                                                       | 0                                        | 3.57                       | 0                                             | 0                                              | 0.91                      | 0                                            |                     | 0                                            |                                    |                                   | 0                                       | 1.02                                           | 0.00                     |                                |                                | 0.00               | -829.45                             | -829.45                        |                                  |                               |
| 52               | 1973 | Ji Yunxian                        | 2               | poor peasant               | 8                     | 1                      | 1                     | 0                       | 1                              |                           |                           | 1                              | 10                                     |                           |                                  |                        | 201                                  |                                      |                                         | 20                              |                                                       | 10                                       | 3.57                       | 357                                           | 181                                            | 0.91                      | 165                                          |                     | 521.71                                       | 521.71                             |                                   |                                         | 181                                            | 1.02                     | 184.62                         |                                | 109.66             | 74.96                               | 5.96                           | 80.92                            |                               |
| 53               | 1973 | Zhang Yumei                       | 1               | poor peasant               | 10.5                  | 3                      | 0                     | 3                       | 5                              | 1                         |                           | 4                              | 44                                     |                           |                                  |                        | 342                                  |                                      |                                         | 26                              |                                                       | 44                                       | 3.57                       | 1570.8                                        | 316                                            | 0.94                      | 297                                          |                     | 1867.84                                      | 373.568                            |                                   |                                         | 316                                            | 1.05                     | 331.80                         | 20.00                          | 307.81             | 43.99                               | 83.65                          | 127.64                           |                               |
| 54               | 1973 | Wang Jishi                        | 1               | middle-class peasant       | 28.5                  | 5                      | 2                     | 3                       | 5                              |                           |                           | 5                              | 50                                     |                           |                                  |                        | 1120                                 |                                      |                                         | 71                              |                                                       | 50                                       | 3.57                       | 1785                                          | 1049                                           | 0.94                      | 986                                          |                     | 2771.06                                      | 554.212                            |                                   |                                         | 1049                                           | 1.05                     | 1101.45                        |                                | 847.32             | 254.13                              | 1083.80                        | 1337.93                          |                               |
| 55               | 1973 | Mu Zhaosheng                      | 2               | middle-class peasant       | 14                    | 2                      | 1                     | 1                       | 5                              |                           | 2                         | 3                              | 44                                     |                           |                                  |                        | 571                                  |                                      |                                         | 35                              |                                                       | 44                                       | 3.57                       | 1570.8                                        | 536                                            | 0.91                      | 488                                          | 100                 | 2158.56                                      | 431.712                            |                                   |                                         | 536                                            | 1.02                     | 546.72                         |                                | 475.77             | 70.95                               | 114.21                         | 185.16                           |                               |
| 56               | 1973 | Li Cuilan                         | 2               | middle-class peasant       | 4                     | 1                      | 0                     | 1                       | 3                              |                           | 1                         | 2                              | 27                                     |                           |                                  |                        | 227                                  |                                      |                                         | 10                              |                                                       | 27                                       | 3.57                       | 963.9                                         | 217                                            | 0.91                      | 197                                          |                     | 1161.37                                      | 387.1233333                        |                                   |                                         | 217                                            | 1.02                     | 221.34                         |                                | 192.20             | 29.14                               | 54.00                          | 83.14                            |                               |

(cont.)

| Household number | Year | Name of the head of the household | Production team | Class status (1)         | Basic work points (2) | Total labor forces (3) | Male labor forces (4) | Female labor forces (5) | Total household population (6) | Age: 1 to 3 years old (7) | Age: 4 to 7 years old (8) | Age: 8 years old and above (9) | Work points of grain distribution (10) | Laboring work points (11) | Farmyard manure work points (12) | Total work points (13) | Work points of compulsory labor (14) | Work points of help cultivation (15) | Work points of private plots labor (16) | Total deducted work points (17) | Actual workdays of participation in distribution (18) | Workpoints for rations distribution (19) | Rations per workpoint (20) | Total rations received from distribution (21) | Workdays of participation in distribution (22) | Grains per workpoint (23) | Total grains distributed by work-points (24) | Grains subsidy (25) | Total Grains received from distribution (26) | Distributed grains per person (27) | Distributed grains per adult (28) | Grains received from privated plots (29) | Workdays of participation in distribution (30) | Value per workpoint (31) | Total value of workpoints (32) | Money used for investment (33) | Sum of income | Money distributed in this year (34) | Deposit/ debt of this year (35) | Deposit/ debt over the years (36) | Accumulated deposit/debt (37) |
|------------------|------|-----------------------------------|-----------------|--------------------------|-----------------------|------------------------|-----------------------|-------------------------|--------------------------------|---------------------------|---------------------------|--------------------------------|----------------------------------------|---------------------------|----------------------------------|------------------------|--------------------------------------|--------------------------------------|-----------------------------------------|---------------------------------|-------------------------------------------------------|------------------------------------------|----------------------------|-----------------------------------------------|------------------------------------------------|---------------------------|----------------------------------------------|---------------------|----------------------------------------------|------------------------------------|-----------------------------------|------------------------------------------|------------------------------------------------|--------------------------|--------------------------------|--------------------------------|---------------|-------------------------------------|---------------------------------|-----------------------------------|-------------------------------|
| 57               | 1973 | Ma Shanming                       | 2               | middle-class peasant     | 14.5                  | 2                      | 1                     | 1                       | 7                              | 1                         |                           | 6                              | 64                                     |                           |                                  |                        | 625                                  |                                      |                                         |                                 | 41                                                    |                                          | 64                         | 3.57                                          | 2284.8                                         | 584                       | 0.91                                         | 531                 |                                              | 2816.24                            | 402.32                            |                                          |                                                | 584                      | 1.02                           | 595.68                         |               | 521.90                              | 73.78                           | -912.60                           | -838.82                       |
| 58               | 1973 | Liang Xiulan                      | 2               | middle-class peasant     | 14                    | 2                      | 1                     | 1                       | 4                              |                           |                           | 4                              | 40                                     |                           |                                  |                        | 437                                  |                                      |                                         |                                 | 35                                                    |                                          | 40                         | 3.57                                          | 1428                                           | 402                       | 0.91                                         | 366                 |                                              | 1793.82                            | 448.455                           |                                          |                                                | 402                      | 1.02                           | 410.04                         |               | 413.59                              | -3.55                           | 101.15                            | 97.60                         |
| 59               | 1973 | Cui Yongchang                     | 1               | poor peasant             | 12                    | 2                      | 1                     | 1                       | 4                              |                           |                           | 4                              | 40                                     |                           |                                  |                        | 434                                  |                                      |                                         |                                 | 30                                                    |                                          | 40                         | 3.57                                          | 1428                                           | 404                       | 0.94                                         | 380                 |                                              | 1807.76                            | 451.94                            |                                          |                                                | 404                      | 1.05                           | 424.20                         |               | 372.94                              | 51.26                           | -112.40                           | -61.14                        |
| 60               | 1973 | Zhang Hengshou                    | 1               | low-middle-class peasant | 16.5                  | 3                      | 1                     | 2                       | 7                              | 1                         | 1                         | 5                              | 61                                     |                           |                                  |                        | 942                                  |                                      |                                         |                                 | 41                                                    |                                          | 61                         | 3.57                                          | 2177.7                                         | 901                       | 0.94                                         | 847                 |                                              | 3024.64                            | 432.0914286                       |                                          |                                                | 901                      | 1.05                           | 946.05                         |               | 593.73                              | 352.32                          | -195.14                           | 157.18                        |
| 61               | 1973 | Zhao Yingtong                     | 1               | poor peasant             | 24.5                  | 4                      | 2                     | 2                       | 7                              | 2                         |                           | 5                              | 58                                     |                           |                                  |                        | 872                                  |                                      |                                         |                                 | 61                                                    |                                          | 58                         | 3.57                                          | 2070.6                                         | 811                       | 0.94                                         | 762                 |                                              | 2832.94                            | 404.7057143                       |                                          |                                                | 811                      | 1.05                           | 851.55                         |               | 621.24                              | 230.31                          | 292.05                            | 522.36                        |
| 62               | 1973 | Wu Xinggui                        | 1               | poor peasant             | 14                    | 2                      | 1                     | 1                       | 4                              | 1                         | 1                         | 2                              | 31                                     |                           |                                  |                        | 628                                  |                                      |                                         |                                 | 35                                                    |                                          | 31                         | 3.57                                          | 1106.7                                         | 593                       | 0.94                                         | 557                 | 20                                           | 1684.12                            | 421.03                            |                                          |                                                | 593                      | 1.05                           | 622.65                         |               | 371.20                              | 251.45                          | -39.93                            | 211.52                        |
| 63               | 1973 | Wang Youfeng                      | 1               | poor peasant             | 5                     | 2                      | 0                     | 2                       | 3                              |                           |                           | 3                              | 30                                     |                           |                                  |                        | 283                                  |                                      |                                         |                                 | 13                                                    |                                          | 30                         | 3.57                                          | 1071                                           | 270                       | 0.94                                         | 254                 |                                              | 1324.8                             | 441.6                             |                                          |                                                | 270                      | 1.05                           | 283.50                         |               | 231.54                              | 51.96                           | -179.17                           | -127.21                       |
| 64               | 1973 | Wang Qingsheng                    | 1               | poor peasant             | 10                    | 1                      | 1                     | 0                       | 2                              |                           |                           | 2                              | 20                                     |                           |                                  |                        | 441                                  |                                      |                                         |                                 |                                                       | 20                                       | 3.57                       | 714                                           | 441                                            | 0.94                      | 415                                          |                     | 1128.54                                      | 564.27                             |                                   |                                          | 441                                            | 1.05                     | 463.05                         |                                | 301.57        | 161.48                              | 295.68                          | 457.16                            |                               |
| 65               | 1973 | Li Yulin                          | 1               | middle-class peasant     | 4                     | 1                      | 0                     | 1                       | 3                              |                           |                           | 3                              | 30                                     |                           |                                  |                        | 582                                  |                                      |                                         |                                 | 10                                                    |                                          | 30                         | 3.57                                          | 1071                                           | 572                       | 0.94                                         | 538                 |                                              | 1608.68                            | 536.2266667                       |                                          |                                                | 572                      | 1.05                           | 600.60                         |               | 526.29                              | 74.31                           | 449.99                            | 524.30                        |
| 66               | 1973 | Zuo Chunlan                       | 1               | middle-class peasant     | 4                     | 1                      | 0                     | 1                       | 6                              |                           | 2                         | 4                              | 54                                     |                           |                                  |                        | 59                                   |                                      |                                         |                                 | 10                                                    |                                          | 54                         | 3.57                                          | 1927.8                                         | 49                        | 0.94                                         | 46                  |                                              | 1973.86                            | 328.9766667                       |                                          |                                                | 49                       | 1.05                           | 51.45                          | 385.00        | 324.02                              | 112.43                          | -96.30                            | 16.13                         |
| 67               | 1973 | Gao Chongji                       | 1               | poor peasant             | 40                    | 6                      | 3                     | 3                       | 11                             | 1                         |                           | 10                             | 104                                    |                           |                                  |                        | 1868                                 |                                      |                                         |                                 | 100                                                   |                                          | 104                        | 3.57                                          | 3712.8                                         | 1768                      | 0.94                                         | 1662                | 20                                           | 5394.72                            | 490.4290909                       |                                          |                                                | 1768                     | 1.05                           | 1856.40                        |               | 1390.00                             | 466.40                          | 860.34                            | 1326.74                       |
| 68               | 1973 | Gao Chongwen                      | 1               | poor peasant             | 26.5                  | 4                      | 2                     | 2                       | 8                              |                           | 2                         | 6                              | 74                                     |                           |                                  |                        | 1099                                 |                                      |                                         |                                 | 66                                                    |                                          | 74                         | 3.57                                          | 2641.8                                         | 1033                      | 0.94                                         | 971                 |                                              | 3612.82                            | 451.6025                          |                                          |                                                | 1033                     | 1.05                           | 1084.65                        |               | 701.21                              | 383.44                          | -550.51                           | -167.07                       |
| 69               | 1973 | Gao Peiren                        | 1               | poor peasant             | 22                    | 3                      | 2                     | 1                       | 8                              |                           | 1                         | 7                              | 77                                     |                           |                                  |                        | 1058                                 |                                      |                                         |                                 | 55                                                    |                                          | 77                         | 3.57                                          | 2748.9                                         | 1003                      | 0.94                                         | 943                 |                                              | 3691.72                            | 461.465                           |                                          |                                                | 1003                     | 1.05                           | 1053.15                        |               | 727.11                              | 326.04                          | -83.97                            | 242.07                        |
| 70               | 1973 | Wang Jingyi                       | 1               | low-middle-class peasant | 6.5                   | 2                      | 0                     | 2                       | 2                              |                           |                           | 2                              | 20                                     |                           |                                  |                        | 248                                  |                                      |                                         |                                 | 16                                                    |                                          | 20                         | 3.57                                          | 714                                            | 232                       | 0.94                                         | 218                 |                                              | 932.08                             | 466.04                            |                                          |                                                | 232                      | 1.05                           | 243.60                         |               | 282.09                              | -38.49                          | 379.23                            | 340.74                        |
| 71               | 1973 | Wang Shutang                      | 1               | low-middle-class peasant | 14                    | 2                      | 1                     | 1                       | 4                              |                           | 1                         | 3                              | 37                                     |                           |                                  |                        | 877                                  |                                      |                                         |                                 | 35                                                    |                                          | 37                         | 3.57                                          | 1320.9                                         | 842                       | 0.94                                         | 791                 | 20                                           | 2132.38                            | 533.095                           |                                          |                                                | 842                      | 1.05                           | 884.10                         |               | 430.77                              | 453.33                          | 124.01                            | 577.34                        |
| 72               | 1973 | Meng Peizhong                     | 1               | middle-class peasant     |                       |                        |                       |                         | 1                              |                           |                           | 1                              | 10                                     |                           |                                  |                        | 413                                  |                                      |                                         |                                 | 10                                                    |                                          | 10                         | 3.57                                          | 357                                            | 403                       | 0.94                                         | 379                 |                                              | 735.82                             | 735.82                            |                                          |                                                | 403                      | 1.05                           | 423.15                         |               | 260.66                              | 162.49                          | 383.75                            | 546.24                        |
| 73               | 1973 | Meng Peixing                      | 1               | middle-class peasant     | 10.5                  | 2                      | 1                     | 1                       | 4                              |                           |                           | 4                              | 40                                     |                           |                                  |                        | 584                                  |                                      |                                         |                                 | 26                                                    |                                          | 40                         | 3.57                                          | 1428                                           | 558                       | 0.94                                         | 525                 |                                              | 1952.52                            | 488.13                            |                                          |                                                | 558                      | 1.05                           | 585.90                         |               | 456.15                              | 129.75                          | 192.85                            | 322.60                        |
| 74               | 1973 | Meng Mingbiao                     | 1               | middle-class peasant     | 14                    | 2                      | 1                     | 1                       | 6                              |                           | 2                         | 4                              | 54                                     |                           |                                  |                        | 393                                  |                                      |                                         |                                 | 35                                                    |                                          | 54                         | 3.57                                          | 1927.8                                         | 358                       | 0.94                                         | 337                 |                                              | 2264.32                            | 377.3866667                       |                                          |                                                | 358                      | 1.05                           | 375.90                         |               | 438.34                              | -62.44                          | -224.58                           | -287.02                       |
| 75               | 1973 | Xue Yuhua                         | 1               | poor peasant             | 2.5                   | 1                      | 0                     | 1                       | 3                              |                           |                           | 3                              | 30                                     |                           |                                  |                        | 78                                   |                                      |                                         |                                 | 6                                                     |                                          | 30                         | 3.57                                          | 1071                                           | 72                        | 0.94                                         | 68                  | 50                                           | 1188.68                            | 396.2266667                       |                                          |                                                | 72                       | 1.05                           | 75.60                          |               | 213.31                              | -137.71                         | -315.97                           | -453.68                       |
| 76               | 1973 | Wang Chuanai                      | 1               | middle-class peasant     | 4                     | 1                      | 0                     | 1                       | 5                              | 1                         | 2                         | 2                              | 38                                     |                           |                                  |                        | 21                                   |                                      |                                         |                                 | 10                                                    |                                          | 38                         | 3.57                                          | 1356.6                                         | 11                        | 0.94                                         | 10                  |                                              | 1366.94                            | 273.388                           |                                          |                                                | 11                       | 1.05                           | 11.55                          | 220.00        | 240.48                              | -8.93                           | -181.35                           | -190.28                       |

(cont.)

| Household number | Year | Name of the head of the household | Production team | Class status (1)         | Basic work points (2) | Total labor forces (3) | Male labor forces (4) | Female labor forces (5) | Total household population (6) | Age: 1 to 3 years old (7) | Age: 4 to 7 years old (8) | Age: 8 years old and above (9) | Work points of grain distribution (10) | Laboring work points (11) | Farmyard manure work points (12) | Total work points (13) | Work points of compulsory labor (14) | Work points of help cultivation (15) | Work points of private plots labor (16) | Total deducted work points (17) | Actual workdays of participation in distribution (18) | Workpoints for rations distribution (19) | Rations per workpoint (20) | Total rations received from distribution (21) | Workdays of participation in distribution (22) | Grains per workpoint (23) | Total grains distributed by work-points (24) | Grains subsidy (25) | Total Grains received from distribution (26) | Distributed grains per person (27) | Distributed grains per adult (28) | Grains received from private plots (29) | Workdays of participation in distribution (30) | Value per workpoint (31) | Total value of workpoints (32) | Money used for investment (33) | Sum of income (34) | Money distributed in this year (34) | Deposit/debt of this year (35) | Deposit/debt over the years (36) | Accumulated deposit/debt (37) |
|------------------|------|-----------------------------------|-----------------|--------------------------|-----------------------|------------------------|-----------------------|-------------------------|--------------------------------|---------------------------|---------------------------|--------------------------------|----------------------------------------|---------------------------|----------------------------------|------------------------|--------------------------------------|--------------------------------------|-----------------------------------------|---------------------------------|-------------------------------------------------------|------------------------------------------|----------------------------|-----------------------------------------------|------------------------------------------------|---------------------------|----------------------------------------------|---------------------|----------------------------------------------|------------------------------------|-----------------------------------|-----------------------------------------|------------------------------------------------|--------------------------|--------------------------------|--------------------------------|--------------------|-------------------------------------|--------------------------------|----------------------------------|-------------------------------|
| 77               | 1973 | Wang Zhenguo                      | 1               | low-middle-class peasant | 10.5                  | 2                      | 1                     | 1                       | 3                              |                           |                           | 3                              | 30                                     |                           |                                  |                        | 805                                  |                                      |                                         | 26                              |                                                       | 30                                       | 3.57                       | 1071                                          | 779                                            | 0.94                      | 732                                          |                     | 1803.26                                      | 601.0866667                        |                                   | 779                                     | 1.05                                           | 817.95                   |                                |                                | 384.33             | 433.62                              | 25.87                          | 459.49                           |                               |
| 78               | 1973 | Mu Shouquan                       | 1               | poor peasant             | 2.5                   | 1                      | 0                     | 1                       | 2                              |                           |                           | 2                              | 20                                     |                           |                                  |                        | 453                                  |                                      |                                         | 6                               |                                                       | 20                                       | 3.57                       | 714                                           | 447                                            | 0.94                      | 420                                          |                     | 1134.18                                      | 567.09                             |                                   | 447                                     | 1.05                                           | 469.35                   |                                |                                | 297.00             | 172.35                              | 369.51                         | 541.86                           |                               |
| 79               | 1973 | Mu Zhaozheng                      | 1               | poor peasant             | 14                    | 2                      | 1                     | 1                       | 6                              | 2                         | 1                         | 3                              | 43                                     |                           |                                  |                        | 771                                  |                                      |                                         | 35                              |                                                       | 43                                       | 3.57                       | 1535.1                                        | 736                                            | 0.94                      | 692                                          | 20                  | 2246.94                                      | 374.49                             |                                   | 736                                     | 1.05                                           | 772.80                   |                                |                                | 568.24             | 204.56                              | 446.72                         | 651.28                           |                               |
| 80               | 1973 | Ma Likui                          | 1               | poor peasant             | 24.5                  | 4                      | 2                     | 2                       | 6                              | 1                         |                           | 5                              | 54                                     |                           |                                  |                        | 1008                                 |                                      |                                         | 61                              |                                                       | 54                                       | 3.57                       | 1927.8                                        | 947                                            | 0.94                      | 890                                          |                     | 2817.98                                      | 469.6633333                        |                                   | 947                                     | 1.05                                           | 994.35                   |                                |                                | 682.36             | 311.99                              | 348.16                         | 660.15                           |                               |
| 81               | 1973 | Ma Xiulan                         | 1               | middle-class peasant     | 4                     | 1                      | 0                     | 1                       | 6                              | 1                         | 2                         | 3                              | 48                                     |                           |                                  |                        | 58                                   |                                      |                                         | 10                              |                                                       | 48                                       | 3.57                       | 1713.6                                        | 48                                             | 0.94                      | 45                                           |                     | 1758.72                                      | 293.12                             |                                   | 48                                      | 1.05                                           | 50.40                    | 160.00                         |                                |                    | 277.67                              | -67.27                         | 24.97                            | -42.30                        |
| 82               | 1973 | Wang Dianjie                      | 1               | middle-class peasant     | 26.5                  | 4                      | 2                     | 2                       | 8                              | 1                         | 1                         | 6                              | 71                                     |                           |                                  |                        | 1111                                 |                                      |                                         | 66                              |                                                       | 71                                       | 3.57                       | 2534.7                                        | 1045                                           | 0.94                      | 982                                          |                     | 3517                                         | 439.625                            |                                   | 1045                                    | 1.05                                           | 1097.25                  |                                |                                | 762.21             | 335.04                              | 76.97                          | 412.01                           |                               |
| 83               | 1973 | Wang Litang                       | 1               | low-middle-class peasant | 22                    | 3                      | 2                     | 1                       | 9                              | 1                         | 2                         | 6                              | 78                                     |                           |                                  |                        | 1187                                 |                                      |                                         | 55                              |                                                       | 78                                       | 3.57                       | 2784.6                                        | 1132                                           | 0.94                      | 1064                                         |                     | 3848.68                                      | 427.6311111                        |                                   | 1132                                    | 1.05                                           | 1188.60                  |                                |                                | 948.95             | 239.65                              | 262.83                         | 502.48                           |                               |
| 84               | 1973 | Wei Zhaoliang                     | 1               | low-middle-class peasant | 20                    | 3                      | 2                     | 1                       | 4                              |                           |                           | 4                              | 40                                     |                           |                                  |                        | 628                                  |                                      |                                         | 50                              |                                                       | 40                                       | 3.57                       | 1428                                          | 578                                            | 0.94                      | 543                                          |                     | 1971.32                                      | 492.83                             |                                   | 578                                     | 1.05                                           | 606.90                   |                                |                                | 451.51             | 155.39                              | 216.54                         | 371.93                           |                               |
| 85               | 1973 | Yang Zhongwen                     | 2               | middle-class peasant     |                       |                        |                       |                         | 2                              |                           |                           | 2                              | 20                                     |                           |                                  |                        | 9                                    |                                      |                                         |                                 |                                                       | 20                                       | 3.57                       | 714                                           | 9                                              | 0.91                      | 8                                            |                     | 722.19                                       | 361.095                            |                                   | 9                                       | 1.02                                           | 9.18                     |                                |                                | 124.81             | -115.63                             | -653.03                        | -768.66                          |                               |
| 86               | 1973 | Zhu Guangchang                    | 2               | middle-class peasant     | 22                    | 3                      | 2                     | 1                       | 4                              |                           |                           | 4                              | 40                                     |                           |                                  |                        | 1284                                 |                                      |                                         | 55                              |                                                       | 40                                       | 3.57                       | 1428                                          | 1229                                           | 0.91                      | 1118                                         | 30                  | 2576.39                                      | 644.0975                           |                                   | 1229                                    | 1.02                                           | 1253.58                  |                                |                                | 790.01             | 463.57                              | 360.94                         | 824.51                           |                               |
| 87               | 1973 | Yang Yugui                        | 1               | middle-class peasant     | 8                     | 1                      | 1                     | 0                       | 3                              |                           |                           | 3                              | 30                                     |                           |                                  |                        | 415                                  |                                      |                                         | 20                              |                                                       | 30                                       | 3.57                       | 1071                                          | 395                                            | 0.94                      | 371                                          |                     | 1442.3                                       | 480.7666667                        |                                   | 395                                     | 1.05                                           | 414.75                   |                                |                                | 305.09             | 109.66                              | -33.27                         | 76.39                            |                               |
| 88               | 1973 | Yang Yingzhou                     | 2               | middle-class peasant     | 14                    | 2                      | 1                     | 1                       | 3                              |                           |                           | 3                              | 30                                     |                           |                                  |                        | 527                                  |                                      |                                         | 35                              |                                                       | 30                                       | 3.57                       | 1071                                          | 492                                            | 0.91                      | 448                                          | 100                 | 1618.72                                      | 539.5733333                        |                                   | 492                                     | 1.02                                           | 501.84                   |                                |                                | 565.30             | -63.46                              | 201.07                         | 137.61                           |                               |
| 89               | 1973 | Li Kailiang                       | 1               | poor peasant             | 10                    | 1                      | 1                     | 0                       | 2                              |                           |                           | 2                              | 20                                     |                           |                                  |                        | 401                                  |                                      |                                         | 25                              |                                                       | 20                                       | 3.57                       | 714                                           | 376                                            | 0.94                      | 353                                          |                     | 1067.44                                      | 533.72                             |                                   | 376                                     | 1.05                                           | 394.80                   |                                |                                | 258.09             | 136.71                              | 174.84                         | 311.55                           |                               |
| 90               | 1973 | Li Kaigong                        | 1               | poor peasant             | 5                     | 2                      | 0                     | 2                       | 3                              |                           |                           | 3                              | 30                                     |                           |                                  |                        | 686                                  |                                      |                                         | 13                              |                                                       | 30                                       | 3.57                       | 1071                                          | 673                                            | 0.94                      | 633                                          |                     | 1703.62                                      | 567.8733333                        |                                   | 673                                     | 1.05                                           | 706.65                   |                                |                                | 452.53             | 254.12                              | 437.14                         | 691.26                           |                               |
| 91               | 1973 | Meng Jingcan                      | 1               | poor peasant             | 4                     | 1                      | 0                     | 1                       | 6                              | 1                         | 1                         | 4                              | 49                                     |                           |                                  |                        | 151                                  |                                      |                                         | 10                              |                                                       | 49                                       | 3.57                       | 1749.3                                        | 141                                            | 0.94                      | 133                                          |                     | 1881.84                                      | 313.64                             |                                   | 141                                     | 1.05                                           | 148.05                   | 180.00                         |                                |                    | 315.49                              | 12.56                          | 85.17                            | 97.73                         |
| 92               | 1973 | Fu Lidong                         | 1               | middle-class peasant     |                       |                        |                       |                         | 1                              |                           |                           | 1                              | 10                                     |                           |                                  |                        | 226                                  |                                      |                                         |                                 |                                                       | 10                                       | 3.57                       | 357                                           | 226                                            | 0.94                      | 212                                          |                     | 569.44                                       | 569.44                             |                                   | 226                                     | 1.05                                           | 237.30                   |                                |                                | 129.28             | 108.02                              | 89.26                          | 197.28                           |                               |
| 93               | 1973 | Meng Peicheng                     | 1               | middle-class peasant     | 14                    | 2                      | 1                     | 1                       | 8                              | 1                         | 2                         | 5                              | 68                                     |                           |                                  |                        | 563                                  |                                      |                                         | 35                              |                                                       | 68                                       | 3.57                       | 2427.6                                        | 528                                            | 0.94                      | 496                                          | 20                  | 2943.92                                      | 367.99                             |                                   | 528                                     | 1.05                                           | 554.40                   |                                |                                | 602.72             | -48.32                              | -766.41                        | -814.73                          |                               |
| 94               | 1973 | Mu Shouwen                        | 1               | middle-class peasant     | 14                    | 2                      | 1                     | 1                       | 7                              | 1                         | 1                         | 5                              | 61                                     |                           |                                  |                        | 628                                  |                                      |                                         | 35                              |                                                       | 61                                       | 3.57                       | 2177.7                                        | 593                                            | 0.94                      | 557                                          |                     | 2735.12                                      | 390.7314286                        |                                   | 593                                     | 1.05                                           | 622.65                   |                                |                                | 649.04             | -26.39                              | 130.47                         | 104.08                           |                               |
| 95               | 1973 | Mu Zhaorui                        | 1               | middle-class peasant     | 14                    | 2                      | 1                     | 1                       | 3                              | 1                         |                           | 2                              | 24                                     |                           |                                  |                        | 439                                  |                                      |                                         | 35                              |                                                       | 24                                       | 3.57                       | 856.8                                         | 404                                            | 0.94                      | 380                                          | 20                  | 1256.56                                      | 418.8533333                        |                                   | 404                                     | 1.05                                           | 424.20                   |                                |                                | 429.60             | -5.40                               | 483.86                         | 478.46                           |                               |

(cont.)

| Household number | Year | Name of the head of the household | Production team | Class status (1)         | Basic work points (2) | Total labor forces (3) | Male labor forces (4) | Female labor forces (5) | Total household population (6) | Age: 1 to 3 years old (7) | Age: 4 to 7 years old (8) | Age: 8 years old and above (9) | Work points of grain distribution (10) | Laboring work points (11) | Farmyard manure work points (12) | Total work points (13) | Work points of compulsory labor (14) | Work points of help cultivation (15) | Work points of private plots labor (16) | Total deducted work points (17) | Acutal workdays of participation in distribution (18) | Workpoints for rations distribution (19) | Rations per workpoint (20) | Total rations received form distribution (21) | Workdays of participation in distribu-tion (22) | Grains per workpoint (23) | Total grains distributed by work-points (24) | Grains subsidy (25) | Total Grains received from distribution (26) | Distributed grains per person (27) | Distributed grains per adult (28) | Grains received from privated plots (29) | Workdays of participation in distribution (30) | Value per workpoint (31) | Total value of workpoints (32) | Money used for investment (33) | Sum of income (34) | Money distributed in this year (34) | Deposit/ debt of this year (35) | Deposit/ debt over the years (36) | Accumulated deposit/debt (37) |
|------------------|------|-----------------------------------|-----------------|--------------------------|-----------------------|------------------------|-----------------------|-------------------------|--------------------------------|---------------------------|---------------------------|--------------------------------|----------------------------------------|---------------------------|----------------------------------|------------------------|--------------------------------------|--------------------------------------|-----------------------------------------|---------------------------------|-------------------------------------------------------|------------------------------------------|----------------------------|-----------------------------------------------|-------------------------------------------------|---------------------------|----------------------------------------------|---------------------|----------------------------------------------|------------------------------------|-----------------------------------|------------------------------------------|------------------------------------------------|--------------------------|--------------------------------|--------------------------------|--------------------|-------------------------------------|---------------------------------|-----------------------------------|-------------------------------|
| 96               | 1973 | Zhang Lirong                      | 2               | middle-class peasant     | 14                    | 2                      | 1                     | 1                       | 5                              | 1                         | 1                         | 3                              | 41                                     |                           |                                  |                        | 638                                  |                                      |                                         |                                 | 35                                                    |                                          | 41                         | 3.57                                          | 1463.7                                          | 603                       | 0.91                                         | 549                 |                                              | 2012.43                            | 402.486                           |                                          | 603                                            | 1.02                     | 615.06                         |                                |                    | 490.78                              | 124.28                          | 498.50                            | 622.78                        |
| 97               | 1973 | Cui Yongfu                        | 1               | poor peasant             | 24.5                  | 4                      | 2                     | 2                       | 6                              |                           |                           | 6                              | 60                                     |                           |                                  |                        | 1065                                 |                                      |                                         |                                 | 61                                                    |                                          | 60                         | 3.57                                          | 2142                                            | 1004                      | 0.94                                         | 944                 |                                              | 3085.76                            | 514.2933333                       |                                          | 1004                                           | 1.05                     | 1054.20                        |                                |                    | 990.84                              | 63.36                           | 564.88                            | 628.24                        |
| 98               | 1973 | Meng Lanying                      | 1               | poor peasant             |                       |                        |                       |                         | 1                              |                           |                           | 1                              | 10                                     |                           |                                  |                        |                                      |                                      |                                         |                                 |                                                       | 10                                       | 3.57                       | 357                                           | 0                                               | 0.94                      | 0                                            |                     | 357                                          |                                    | 357                               |                                          | 0                                              | 1.05                     | 0.00                           |                                |                    | 49.07                               | -49.07                          | -430.30                           | -479.37                       |
| 99               | 1973 | Cui Yiren                         | 1               | poor peasant             | 14                    | 2                      | 1                     | 1                       | 5                              | 1                         | 2                         | 2                              | 38                                     |                           |                                  |                        | 457                                  |                                      |                                         |                                 | 35                                                    |                                          | 38                         | 3.57                                          | 1356.6                                          | 422                       | 0.94                                         | 397                 |                                              | 1753.28                            | 350.656                           |                                          | 422                                            | 1.05                     | 443.10                         |                                |                    | 435.68                              | 7.42                            | 43.37                             | 50.79                         |
| 100              | 1973 | Wang Qingde                       | 1               | low-middle-class peasant | 8                     | 1                      | 1                     | 0                       | 1                              |                           |                           | 1                              | 10                                     |                           |                                  |                        | 307                                  |                                      |                                         |                                 | 20                                                    |                                          | 10                         | 3.57                                          | 357                                             | 287                       | 0.94                                         | 270                 |                                              | 626.78                             | 626.78                            |                                          | 287                                            | 1.05                     | 301.35                         |                                |                    | 254.69                              | 46.66                           | 479.02                            | 525.68                        |
| 101              | 1973 | Jin Lianyu                        | 1               | poor peasant             |                       |                        |                       |                         | 1                              |                           |                           | 1                              | 10                                     |                           |                                  |                        |                                      |                                      |                                         |                                 |                                                       | 10                                       | 3.57                       | 357                                           | 0                                               | 0.94                      | 0                                            | 30                  | 387                                          |                                    | 387                               |                                          | 0                                              | 1.05                     | 0.00                           |                                |                    | 111.24                              | -111.24                         | -1022.71                          | -1133.95                      |
| 102              | 1973 | Wang Qiyi                         | 2               | poor peasant             | 8                     | 1                      | 1                     | 0                       | 1                              |                           |                           | 1                              | 10                                     |                           |                                  |                        | 373                                  |                                      |                                         |                                 | 20                                                    |                                          | 10                         | 3.57                                          | 357                                             | 353                       | 0.91                                         | 321                 |                                              | 678.23                             | 678.23                            |                                          | 353                                            | 1.02                     | 360.06                         |                                |                    | 159.79                              | 200.27                          | 109.91                            | 310.18                        |
| 103              | 1973 | Yang Chengye                      | 1               | poor peasant             |                       |                        |                       |                         | 1                              |                           |                           | 1                              | 10                                     |                           |                                  |                        | 111                                  |                                      |                                         |                                 |                                                       | 10                                       | 3.57                       | 357                                           | 111                                             | 0.94                      | 104                                          |                     | 461.34                                       |                                    | 461.34                            |                                          | 111                                            | 1.05                     | 116.55                         |                                |                    | 98.34                               | 18.21                           | 106.03                            | 124.24                        |
| 104              | 1973 | Meng Mingjian                     | 1               | poor peasant             | 8                     | 1                      | 1                     | 0                       | 3                              |                           |                           | 3                              | 30                                     |                           |                                  |                        | 371                                  |                                      |                                         |                                 | 20                                                    |                                          | 30                         | 3.57                                          | 1071                                            | 351                       | 0.94                                         | 330                 |                                              | 1400.94                            | 466.98                            |                                          | 351                                            | 1.05                     | 368.55                         |                                |                    | 358.93                              | 9.62                            | 62.33                             | 71.95                         |
| 105              | 1973 | Guo Yuexiang                      | 1               | poor peasant             | 4                     | 1                      | 0                     | 1                       | 6                              | 1                         | 1                         | 4                              | 51                                     |                           |                                  |                        | 430                                  |                                      |                                         |                                 | 10                                                    |                                          | 51                         | 3.57                                          | 1820.7                                          | 420                       | 0.94                                         | 395                 |                                              | 2215.5                             | 369.25                            |                                          | 420                                            | 1.05                     | 441.00                         | 90.00                          |                    | 359.24                              | 171.76                          | 5.86                              | 177.62                        |
| 106              | 1973 | Wu Congchao                       | 2               | poor peasant             | 18                    | 3                      | 1                     | 2                       | 7                              | 1                         | 1                         | 5                              | 61                                     |                           |                                  |                        | 897                                  |                                      |                                         |                                 | 45                                                    |                                          | 61                         | 3.57                                          | 2177.7                                          | 817                       | 0.91                                         | 743                 |                                              | 2921.17                            | 417.31                            |                                          | 817                                            | 1.02                     | 833.34                         | 18.00                          |                    | 739.43                              | 111.91                          | -397.91                           | -286.00                       |
| 107              | 1973 | Xie Yuzhen                        | 2               | poor peasant             | 14                    | 2                      | 1                     | 1                       | 2                              |                           |                           | 2                              | 20                                     |                           |                                  |                        |                                      |                                      |                                         |                                 |                                                       | 20                                       | 3.57                       | 714                                           | 0                                               | 0.91                      | 0                                            |                     | 714                                          |                                    | 357                               |                                          | 0                                              | 1.02                     | 0.00                           |                                |                    | 86.21                               | -86.21                          | -182.27                           | -268.48                       |
| 108              | 1973 | Wu Songlin                        | 2               | poor peasant             |                       |                        |                       |                         | 1                              |                           |                           | 1                              | 10                                     |                           |                                  |                        | 28                                   |                                      |                                         |                                 |                                                       | 10                                       | 3.57                       | 357                                           | 28                                              | 0.91                      | 25                                           |                     | 382.48                                       |                                    | 382.48                            |                                          | 28                                             | 1.02                     | 28.56                          |                                |                    | 97.85                               | -69.29                          | -973.05                           | -1042.34                      |
| 109              | 1973 | Yang Chunmei                      | 2               | poor peasant             | 14                    | 2                      | 1                     | 1                       | 5                              |                           | 1                         | 4                              | 47                                     |                           |                                  |                        | 742                                  |                                      |                                         |                                 | 35                                                    |                                          | 47                         | 3.57                                          | 1677.9                                          | 707                       | 0.91                                         | 643                 |                                              | 2321.27                            | 464.254                           |                                          | 707                                            | 1.02                     | 721.14                         |                                |                    | 426.96                              | 294.18                          | -713.60                           | -419.42                       |
| 110              | 1973 | Wu Yulan                          | 2               | poor peasant             | 4                     | 1                      | 0                     | 1                       | 5                              | 1                         | 1                         | 3                              | 41                                     |                           |                                  |                        | 450                                  |                                      |                                         |                                 | 10                                                    |                                          | 41                         | 3.57                                          | 1463.7                                          | 440                       | 0.91                                         | 400                 |                                              | 1864.1                             | 372.82                            |                                          | 440                                            | 1.02                     | 448.80                         |                                |                    | 297.96                              | 150.84                          | -7.66                             | 143.18                        |
| 111              | 1973 | Hua Suzhen                        | 1               | poor peasant             | 6.5                   | 2                      | 0                     | 2                       | 2                              |                           |                           | 2                              | 20                                     |                           |                                  |                        | 313                                  |                                      |                                         |                                 | 16                                                    |                                          | 20                         | 3.57                                          | 714                                             | 297                       | 0.94                                         | 279                 |                                              | 993.18                             | 496.59                            |                                          | 297                                            | 1.05                     | 311.85                         |                                |                    | 284.86                              | 26.99                           | 185.29                            | 212.28                        |
| 112              | 1973 | Song Liangxiang                   | 1               | poor peasant             | 4                     | 1                      | 0                     | 1                       | 1                              |                           |                           | 1                              | 10                                     |                           |                                  |                        | 131                                  |                                      |                                         |                                 | 10                                                    |                                          | 10                         | 3.57                                          | 357                                             | 121                       | 0.94                                         | 114                 |                                              | 470.74                             | 470.74                            |                                          | 121                                            | 1.05                     | 127.05                         |                                |                    | 93.47                               | 33.58                           | 120.03                            | 153.61                        |
| 113              | 1973 | Zhang Dongde                      | 1               | poor peasant             | 5                     | 2                      | 0                     | 2                       | 3                              |                           |                           | 3                              | 30                                     |                           |                                  |                        | 504                                  |                                      |                                         |                                 | 13                                                    |                                          | 30                         | 3.57                                          | 1071                                            | 491                       | 0.94                                         | 462                 |                                              | 1532.54                            | 510.8466667                       |                                          | 491                                            | 1.05                     | 515.55                         |                                |                    | 323.35                              | 192.20                          | 127.29                            | 319.49                        |
| 114              | 1973 | Zhang Zhenyuan                    | 2               | poor peasant             | 14                    | 2                      | 1                     | 1                       | 5                              | 2                         | 1                         | 2                              | 33                                     |                           |                                  |                        | 569                                  |                                      |                                         |                                 | 35                                                    |                                          | 33                         | 3.57                                          | 1166.1                                          | 534                       | 0.91                                         | 486                 | 100                                          | 1752.04                            | 350.408                           |                                          | 534                                            | 1.02                     | 544.68                         |                                |                    | 412.68                              | 132.00                          | 152.31                            | 284.31                        |
| 115              | 1973 | Meng Qingyun                      | 2               | poor peasant             | 8                     | 1                      | 1                     | 0                       | 1                              |                           |                           | 1                              | 10                                     |                           |                                  |                        | 429                                  |                                      |                                         |                                 | 20                                                    |                                          | 10                         | 3.57                                          | 357                                             | 409                       | 0.91                                         | 372                 |                                              | 729.19                             | 729.19                            |                                          | 409                                            | 1.02                     | 417.18                         |                                |                    | 231.88                              | 185.30                          | 436.12                            | 621.42                        |
| 116              | 1973 | Zhao Hongsheng                    | 2               | low-middle-class peasant | 28                    | 4                      | 2                     | 2                       | 8                              | 1                         |                           | 7                              | 74                                     |                           |                                  |                        | 1274                                 |                                      |                                         |                                 | 70                                                    |                                          | 74                         | 3.57                                          | 2593.8                                          | 1204                      | 0.91                                         | 1096                |                                              | 3689.44                            | 461.18                            |                                          | 1204                                           | 1.02                     | 1228.08                        |                                |                    | 837.09                              | 390.99                          | 70.18                             | 461.17                        |
| 117              | 1973 | Mneg Mingyou                      | 2               | poor peasant             | 10                    | 1                      | 1                     | 0                       | 1                              |                           |                           | 1                              | 10                                     |                           |                                  |                        | 355                                  |                                      |                                         |                                 | 25                                                    |                                          | 10                         | 3.57                                          | 357                                             | 330                       | 0.91                                         | 300                 |                                              | 657.3                              | 657.3                             |                                          | 330                                            | 1.02                     | 336.60                         |                                |                    | 226.00                              | 110.60                          | 387.45                            | 498.05                        |
| 118              | 1973 | Xu Peishi                         | 1               | poor peasant             | 23                    | 4                      | 2                     | 2                       | 6                              |                           |                           | 6                              | 60                                     |                           |                                  |                        | 624                                  |                                      |                                         |                                 | 58                                                    |                                          | 60                         | 3.57                                          | 2142                                            | 566                       | 0.94                                         | 532                 | 60                                           | 2734.04                            | 455.6733333                       |                                          | 566                                            | 1.05                     | 594.30                         |                                |                    | 589.50                              | 4.80                            | -772.05                           | -767.25                       |
| 119              | 1973 | Wang Qingchang                    | 1               | poor peasant             | 14                    | 2                      | 1                     | 1                       | 4                              |                           | 1                         | 3                              | 37                                     |                           |                                  |                        | 935                                  |                                      |                                         |                                 | 35                                                    |                                          | 37                         | 3.57                                          | 1320.9                                          | 900                       | 0.94                                         | 846                 |                                              | 2166.9                             | 541.725                           |                                          | 900                                            | 1.05                     | 945.00                         |                                |                    | 613.89                              | 331.11                          | 432.55                            | 763.66                        |
| 120              | 1973 | Wang Qinghai                      | 2               | poor peasant             | 14                    | 2                      | 1                     | 1                       | 10                             | 1                         | 2                         | 7                              | 88                                     |                           |                                  |                        | 879                                  |                                      |                                         |                                 | 35                                                    |                                          | 88                         | 3.57                                          | 3141.6                                          | 844                       | 0.91                                         | 768                 | 60                                           | 3969.64                            | 396.964                           |                                          | 844                                            | 1.02                     | 860.88                         | 5.16                           |                    | 692.89                              | 173.15                          | -762.99                           | -589.84                       |
| 121              | 1973 | Cao Desheng                       | 2               | poor peasant             | 8                     | 1                      | 1                     | 0                       | 1                              |                           |                           | 1                              | 10                                     |                           |                                  |                        | 252                                  |                                      |                                         |                                 | 20                                                    |                                          | 10                         | 3.57                                          | 357                                             | 232                       | 0.91                                         | 211                 |                                              | 568.12                             | 568.12                            |                                          | 232                                            | 1.02                     | 236.64                         |                                |                    | 128.01                              | 108.63                          | 16.64                             | 125.27                        |
| 122              | 1973 | Ma Yuying                         | 2               | poor peasant             |                       |                        |                       |                         | 2                              |                           |                           | 2                              | 20                                     |                           |                                  |                        | 6                                    |                                      |                                         |                                 |                                                       | 20                                       | 3.57                       | 714                                           | 6                                               | 0.91                      | 5                                            |                     | 719.46                                       |                                    | 359.73                            |                                          | 6                                              | 1.02                     | 6.12                           | 90.00                          |                    | 109.69                              | -13.57                          | -233.71                           | -247.28                       |
| 123              | 1973 | Liu Peizhen                       | 2               | poor peasant             |                       |                        |                       |                         | 1                              |                           |                           | 1                              | 10                                     |                           |                                  |                        |                                      |                                      |                                         |                                 |                                                       | 10                                       | 3.57                       | 357                                           | 0                                               | 0.91                      | 0                                            |                     | 357                                          |                                    | 357                               |                                          | 0                                              | 1.02                     | 0.00                           |                                |                    | 55.91                               | -55.91                          | -485.73                           | -541.64                       |

(cont.)

| Household number | Year | Name of the head of the household | Production team | Class status (1)         | Basic work points (2) | Total labor forces (3) | Male labor forces (4) | Female labor forces (5) | Total household population (6) | Age: 1 to 3 years old (7) | Age: 4 to 7 years old (8) | Age: 8 years old and above (9) | Work points of grain distribution (10) | Laboring work points (11) | Farmyard manure work points (12) | Total work points (13) | Work points of compulsory labor (14) | Work points of help cultivation (15) | Work points of private plots labor (16) | Total deducted work points (17) | Acutal workdays of participation in distribution (18) | Workpoints for rations distribution (19) | Rations per workpoint (20) | Total rations received form distribution (21) | Workdays of participation in distribu- tion (22) | Grains per workpoint (23) | Total grains distributed by work- points (24) | Grains subsidy (25) | Total Grains received from distribution (26) | Distributed grains per person (27) | Distributed grains per adult (28) | Grains received from privated plots (29) | Workdays of participation in distribution (30) | Value per workpoint (31) | Total value of workpoints (32) | Money used for investment (33) | Sum of income | Money distributed in this year (34) | Deposit/ debt of this year (35) | Deposit/ debt over the years (36) | Accumulated deposit/debt (37) |
|------------------|------|-----------------------------------|-----------------|--------------------------|-----------------------|------------------------|-----------------------|-------------------------|--------------------------------|---------------------------|---------------------------|--------------------------------|----------------------------------------|---------------------------|----------------------------------|------------------------|--------------------------------------|--------------------------------------|-----------------------------------------|---------------------------------|-------------------------------------------------------|------------------------------------------|----------------------------|-----------------------------------------------|--------------------------------------------------|---------------------------|-----------------------------------------------|---------------------|----------------------------------------------|------------------------------------|-----------------------------------|------------------------------------------|------------------------------------------------|--------------------------|--------------------------------|--------------------------------|---------------|-------------------------------------|---------------------------------|-----------------------------------|-------------------------------|
| 124              | 1973 | Liu Dahai                         | 2               | middle-class peasant     | 16.5                  | 3                      | 1                     | 2                       | 5                              | 2                         |                           | 3                              | 38                                     |                           |                                  | 635                    |                                      |                                      |                                         | 41                              |                                                       | 38                                       | 3.57                       | 1326.6                                        | 594                                              | 0.91                      | 541                                           | 20                  | 1887.14                                      | 377.428                            |                                   |                                          | 594                                            | 1.02                     | 605.88                         |                                | 499.56        | 106.32                              | 409.57                          | 515.89                            |                               |
| 125              | 1973 | Liu Ercan                         | 2               | middle-class peasant     |                       |                        |                       |                         | 2                              |                           |                           | 2                              | 20                                     |                           |                                  |                        |                                      |                                      |                                         |                                 | 20                                                    |                                          | 3.57                       | 714                                           | 0                                                | 0.91                      | 0                                             |                     | 714                                          | 357                                |                                   | 0                                        | 1.02                                           | 0.00                     |                                | 141.49                         | -141.49       | -775.30                             | -916.79                         |                                   |                               |
| 126              | 1973 | Wu Jingxiang                      | 2               | low-middle-class peasant | 4                     | 1                      | 0                     | 1                       | 2                              |                           | 1                         | 1                              | 17                                     |                           |                                  | 29                     |                                      |                                      |                                         | 10                              |                                                       | 17                                       | 3.57                       | 606.9                                         | 19                                               | 0.91                      | 17                                            |                     | 624.19                                       | 312.095                            |                                   | 19                                       | 1.02                                           | 19.38                    |                                | 113.14                         | -93.76        | -55.38                              | -149.14                         |                                   |                               |
| 127              | 1973 | Zhang Hengde                      | 2               | poor peasant             | 16.5                  | 3                      | 1                     | 2                       | 7                              |                           |                           | 7                              | 70                                     |                           |                                  | 1253                   |                                      |                                      |                                         | 41                              |                                                       | 70                                       | 3.57                       | 2499                                          | 1212                                             | 0.91                      | 1103                                          | 100                 | 3701.92                                      | 528.8457143                        |                                   | 1212                                     | 1.02                                           | 1236.24                  |                                | 864.79                         | 371.45        | 797.42                              | 1168.87                         |                                   |                               |
| 128              | 1973 | Zhang Hengde                      | 2               | poor peasant             | 8                     |                        | 1                     |                         | 1                              |                           |                           | 1                              | 10                                     |                           |                                  | 326                    |                                      |                                      |                                         | 20                              |                                                       | 10                                       | 3.57                       | 357                                           | 306                                              | 0.91                      | 278                                           |                     | 635.46                                       | 635.46                             |                                   | 306                                      | 1.02                                           | 312.12                   |                                | 209.74                         | 102.38        | 292.43                              | 394.81                          |                                   |                               |
| 129              | 1973 | Wei Zhaoxiang                     | 2               | low-middle-class peasant | 10                    | 1                      | 1                     | 0                       | 3                              |                           |                           | 3                              | 30                                     |                           |                                  | 530                    |                                      |                                      |                                         | 25                              |                                                       | 30                                       | 3.57                       | 1071                                          | 505                                              | 0.91                      | 460                                           | 20                  | 1550.55                                      | 516.85                             |                                   | 505                                      | 1.02                                           | 515.10                   |                                | 435.76                         | 79.34         | 357.39                              | 436.73                          |                                   |                               |
| 130              | 1973 | Mu Zhaoren                        | 2               | poor peasant             | 22                    | 2                      | 1                     | 1                       | 7                              | 1                         |                           | 6                              | 64                                     |                           |                                  | 868                    |                                      |                                      |                                         | 55                              |                                                       | 64                                       | 3.57                       | 2284.8                                        | 813                                              | 0.91                      | 740                                           | 100                 | 3124.63                                      | 446.3757143                        |                                   | 813                                      | 1.02                                           | 829.26                   |                                | 599.52                         | 229.74        | -418.68                             | -188.94                         |                                   |                               |
| 131              | 1973 | Li Shiyong                        | 2               | poor peasant             |                       |                        |                       |                         | 2                              |                           |                           | 2                              | 20                                     |                           |                                  | 264                    |                                      |                                      |                                         |                                 | 20                                                    | 3.57                                     | 714                        | 264                                           | 0.91                                             | 240                       |                                               | 954.24              | 477.12                                       |                                    | 264                               | 1.02                                     | 269.28                                         |                          | 177.35                         | 91.93                          | 90.69         | 182.62                              |                                 |                                   |                               |
| 132              | 1973 | Wu Jinggui                        | 1               | low-middle-class peasant | 28.5                  | 5                      | 2                     | 3                       | 9                              | 1                         |                           | 8                              | 84                                     |                           |                                  | 1548                   |                                      |                                      |                                         | 71                              |                                                       | 84                                       | 3.57                       | 2998.8                                        | 1477                                             | 0.94                      | 1388                                          | 100                 | 4487.18                                      | 498.5755556                        |                                   | 1477                                     | 1.05                                           | 1550.85                  |                                | 1204.87                        | 345.98        | 726.99                              | 1072.97                         |                                   |                               |
| 133              | 1973 | Wu Jingfang                       | 2               | middle-class peasant     | 14                    | 2                      | 1                     | 1                       | 7                              | 1                         | 2                         | 4                              | 58                                     |                           |                                  | 394                    |                                      |                                      |                                         | 35                              |                                                       | 58                                       | 3.57                       | 2070.6                                        | 359                                              | 0.91                      | 327                                           |                     | 2397.29                                      | 342.47                             |                                   | 359                                      | 1.02                                           | 366.18                   |                                | 491.56                         | -125.38       | -826.47                             | -951.85                         |                                   |                               |
| 134              | 1973 | Wu Jingyu                         | 2               | low-middle-class peasant | 24                    | 3                      | 2                     | 1                       | 6                              |                           | 1                         | 5                              | 57                                     |                           |                                  | 1019                   |                                      |                                      |                                         | 60                              |                                                       | 57                                       | 3.57                       | 2034.9                                        | 959                                              | 0.91                      | 873                                           |                     | 2907.59                                      | 484.5983333                        |                                   | 959                                      | 1.02                                           | 978.18                   |                                | 779.22                         | 198.96        | 472.75                              | 671.71                          |                                   |                               |
| 135              | 1973 | Wu Jinghua                        | 2               | low-middle-class peasant | 24                    | 3                      | 2                     | 1                       | 5                              |                           |                           | 5                              | 50                                     |                           |                                  | 821                    |                                      |                                      |                                         | 60                              |                                                       | 50                                       | 3.57                       | 1785                                          | 761                                              | 0.91                      | 693                                           |                     | 2477.51                                      | 495.502                            |                                   | 761                                      | 1.02                                           | 776.22                   |                                | 1229.93                        | -453.71       | 792.88                              | 339.17                          |                                   |                               |
| 136              | 1973 | Wu Changbiao                      | 2               | middle-class peasant     |                       |                        |                       |                         | 1                              |                           |                           | 1                              | 10                                     |                           |                                  | 212                    |                                      |                                      |                                         |                                 | 10                                                    | 3.57                                     | 357                        | 212                                           | 0.91                                             | 193                       |                                               | 549.92              | 549.92                                       |                                    | 212                               | 1.02                                     | 216.24                                         |                          | 268.59                         | -52.35                         | 199.38        | 147.03                              |                                 |                                   |                               |
| 137              | 1973 | Wu Jingnan                        | 2               | middle-class peasant     | 14                    | 2                      | 1                     | 1                       | 7                              | 1                         | 1                         | 5                              | 61                                     |                           |                                  | 662                    |                                      |                                      |                                         | 10                              |                                                       | 61                                       | 3.57                       | 2177.7                                        | 652                                              | 0.91                      | 593                                           |                     | 2771.02                                      | 395.86                             |                                   | 652                                      | 1.02                                           | 665.04                   |                                | 715.87                         | -50.83        | -103.46                             | -154.29                         |                                   |                               |
| 138              | 1973 | Wu Jing'an                        | 2               | middle-class peasant     | 10                    | 1                      | 1                     | 0                       | 2                              |                           |                           | 2                              | 20                                     |                           |                                  | 383                    |                                      |                                      |                                         | 25                              |                                                       | 20                                       | 3.57                       | 714                                           | 358                                              | 0.91                      | 326                                           |                     | 1039.78                                      | 519.89                             |                                   | 358                                      | 1.02                                           | 365.16                   |                                | 663.82                         | -298.66       | 156.72                              | -141.94                         |                                   |                               |
| 139              | 1973 | Wu Jinghui                        | 2               | middle-class peasant     | 14                    | 2                      | 1                     | 1                       | 6                              | 1                         | 2                         | 3                              | 46                                     |                           |                                  | 721                    |                                      |                                      |                                         | 35                              |                                                       | 46                                       | 3.57                       | 1642.2                                        | 686                                              | 0.91                      | 624                                           | 20                  | 2286.46                                      | 381.0766667                        |                                   | 686                                      | 1.02                                           | 699.72                   |                                | 567.62                         | 132.10        | 315.55                              | 447.65                          |                                   |                               |
| 140              | 1973 | Wu Jingying                       | 2               | middle-class peasant     | 14                    | 2                      | 1                     | 1                       | 8                              |                           | 2                         | 6                              | 74                                     |                           |                                  | 590                    |                                      |                                      |                                         | 35                              |                                                       | 74                                       | 3.57                       | 2641.8                                        | 555                                              | 0.91                      | 505                                           |                     | 3146.85                                      | 393.35625                          |                                   | 555                                      | 1.02                                           | 566.10                   |                                | 595.39                         | -29.29        | -248.21                             | -277.50                         |                                   |                               |
| 141              | 1973 | Wu Jingfu                         | 2               | middle-class peasant     | 14                    | 2                      | 1                     | 1                       | 6                              | 2                         | 2                         | 2                              | 40                                     |                           |                                  | 536                    |                                      |                                      |                                         | 35                              |                                                       | 40                                       | 3.57                       | 1416                                          | 501                                              | 0.91                      | 456                                           |                     | 1871.91                                      | 311.985                            |                                   | 501                                      | 1.02                                           | 511.02                   |                                | 437.96                         | 73.06         | -17.12                              | 55.94                           |                                   |                               |



(cont.)

| Household number | Year | Name of the head of the household | Production team | Class status (1)           | Basic work points (2) | Total labor forces (3) | Male labor forces (4) | Female labor forces (5) | Total household population (6) | Age: 1 to 3 years old (7) | Age: 4 to 7 years old (8) | Age: 8 years old and above (9) | Work points of grain distribution (10) | Laboring work points (11) | Farmyard manure work points (12) | Total work points (13) | Work points of compulsory labor (14) | Work points of help cultivation (15) | Work points of private plots labor (16) | Total deducted work points (17) | Actual workdays of participation in distribution (18) | Workpoints for rations distribution (19) | Rations per workpoint (20) | Total rations received from distribution (21) | Workdays of participation in distribution (22) | Grains per workpoint (23) | Total grains distributed by work-points (24) | Grains subsidy (25) | Total Grains received from distribution (26) | Distributed grains per person (27) | Distributed grains per adult (28) | Grains received from private plots (29) | Workdays of participation in distribution (30) | Value per workpoint (31) | Total value of workpoints (32) | Money used for investment (33) | Sum of income (34) | Money distributed in this year (34) | Deposit/debt of this year (35) | Deposit/debt over the years (36) | Accumulated deposit/debt (37) |       |
|------------------|------|-----------------------------------|-----------------|----------------------------|-----------------------|------------------------|-----------------------|-------------------------|--------------------------------|---------------------------|---------------------------|--------------------------------|----------------------------------------|---------------------------|----------------------------------|------------------------|--------------------------------------|--------------------------------------|-----------------------------------------|---------------------------------|-------------------------------------------------------|------------------------------------------|----------------------------|-----------------------------------------------|------------------------------------------------|---------------------------|----------------------------------------------|---------------------|----------------------------------------------|------------------------------------|-----------------------------------|-----------------------------------------|------------------------------------------------|--------------------------|--------------------------------|--------------------------------|--------------------|-------------------------------------|--------------------------------|----------------------------------|-------------------------------|-------|
| 142              | 1973 | Meng Dongmei                      | 2               | low-middle-class peasant   | 4                     | 1                      | 0                     | 1                       | 5                              | 1                         | 2                         | 2                              | 36                                     |                           |                                  |                        | 56                                   |                                      |                                         |                                 | 10                                                    |                                          | 36                         | 3.57                                          | 1285.2                                         | 46                        | 0.91                                         | 42                  |                                              | 1327.06                            | 265.412                           |                                         |                                                | 46                       | 1.02                           | 46.92                          | 230.00             |                                     | 226.65                         | 50.27                            | -37.31                        | 12.96 |
| 143              | 1973 | Mneg Tianyu                       | 2               | poor peasant               | 36.5                  | 6                      | 3                     | 3                       | 10                             | 1                         | 1                         | 8                              | 91                                     |                           |                                  |                        | 1171                                 |                                      |                                         |                                 | 91                                                    |                                          | 91                         | 3.57                                          | 3248.7                                         | 1080                      | 0.91                                         | 983                 | 100                                          | 4331.5                             | 433.15                            |                                         |                                                | 1080                     | 1.02                           | 1101.60                        |                    | 940.32                              | 161.28                         | 608.38                           | 769.66                        |       |
| 144              | 1973 | Xue Lanying                       | 2               | middle-class peasant       |                       |                        |                       |                         |                                |                           |                           |                                |                                        |                           |                                  |                        |                                      |                                      |                                         |                                 |                                                       | 0                                        | 3.57                       | 0                                             | 0                                              | 0.91                      | 0                                            |                     | 0                                            |                                    |                                   | 0                                       | 1.02                                           | 0.00                     | 397.55                         |                                |                    | 397.55                              |                                | 397.55                           |                               |       |
| 145              | 1973 | Wang Shufu                        | 2               | poor peasant               | 14                    | 2                      | 1                     | 1                       | 3                              | 1                         |                           | 2                              | 24                                     |                           |                                  |                        | 550                                  |                                      |                                         |                                 | 35                                                    |                                          | 24                         | 3.57                                          | 856.8                                          | 515                       | 0.91                                         | 469                 |                                              | 1325.45                            | 441.8166667                       |                                         |                                                | 515                      | 1.02                           | 525.30                         |                    | 344.08                              | 181.22                         | 245.70                           | 426.92                        |       |
| 146              | 1973 | Li Changsheng                     | 2               | poor peasant               | 14                    | 2                      | 1                     | 1                       | 6                              |                           | 2                         | 4                              | 54                                     |                           |                                  |                        | 763                                  |                                      |                                         |                                 | 10                                                    |                                          | 54                         | 3.57                                          | 1927.8                                         | 753                       | 0.91                                         | 685                 |                                              | 2613.03                            | 435.505                           |                                         |                                                | 753                      | 1.02                           | 768.06                         |                    | 584.73                              | 183.33                         | 176.44                           | 359.77                        |       |
| 147              | 1973 | Zhang Yongqing                    | 2               | poor peasant               |                       |                        |                       |                         | 1                              |                           |                           | 1                              | 10                                     |                           |                                  |                        | 251                                  |                                      |                                         |                                 |                                                       |                                          | 10                         | 3.57                                          | 357                                            | 251                       | 0.91                                         | 228                 |                                              | 585.41                             | 585.41                            |                                         |                                                | 251                      | 1.02                           | 256.02                         |                    | 202.37                              | 53.65                          | 401.58                           | 455.23                        |       |
| 148              | 1973 | Wang Suzhen                       | 2               | poor peasant               |                       |                        |                       |                         | 1                              |                           |                           | 1                              | 10                                     |                           |                                  |                        | 6                                    |                                      |                                         |                                 |                                                       |                                          | 10                         | 3.57                                          | 357                                            | 6                         | 0.91                                         | 5                   |                                              | 362.46                             | 362.46                            |                                         |                                                | 6                        | 1.02                           | 6.12                           |                    | 53.14                               | -47.02                         | -560.70                          | -607.72                       |       |
| 149              | 1973 | Liu Chunxiang                     | 2               | upper-middle-class peasant | 27                    | 5                      | 2                     | 3                       | 5                              |                           |                           | 5                              | 50                                     |                           |                                  |                        | 1235                                 |                                      |                                         |                                 | 68                                                    |                                          | 50                         | 3.57                                          | 1785                                           | 1167                      | 0.91                                         | 1062                |                                              | 2846.97                            | 569.394                           |                                         |                                                | 1167                     | 1.02                           | 1190.34                        |                    | 798.91                              | 391.43                         | 926.67                           | 1318.10                       |       |
| 150              | 1973 | Liu Chunyou                       | 2               | low-middle-class peasant   | 14                    | 2                      | 1                     | 1                       | 5                              | 2                         |                           | 3                              | 38                                     |                           |                                  |                        | 1004                                 |                                      |                                         |                                 | 35                                                    |                                          | 38                         | 3.57                                          | 1356.6                                         | 969                       | 0.91                                         | 882                 |                                              | 2238.39                            | 447.678                           |                                         |                                                | 969                      | 1.02                           | 988.38                         |                    | 840.28                              | 148.10                         | 865.71                           | 1013.81                       |       |
| 151              | 1973 | Wang Kaitai                       | 2               | middle-class peasant       | 14                    | 2                      | 1                     | 1                       | 6                              | 1                         | 2                         | 3                              | 46                                     |                           |                                  |                        | 401                                  |                                      |                                         |                                 | 35                                                    |                                          | 46                         | 3.57                                          | 1642.2                                         | 366                       | 0.91                                         | 333                 |                                              | 1975.26                            | 329.21                            |                                         |                                                | 366                      | 1.02                           | 373.32                         |                    | 395.55                              | -22.23                         | -5.27                            | -27.50                        |       |
| 152              | 1973 | Meng Minghuan                     | 2               | middle-class peasant       |                       |                        |                       |                         | 2                              |                           |                           | 2                              | 20                                     |                           |                                  |                        | 37                                   |                                      |                                         |                                 |                                                       |                                          | 20                         | 3.57                                          | 714                                            | 37                        | 0.91                                         | 34                  |                                              | 747.67                             | 373.835                           |                                         |                                                | 37                       | 1.02                           | 37.74                          |                    | 147.54                              | -109.80                        | -107.81                          | -217.61                       |       |
| 153              | 1973 | Meng Qingfu                       | 2               | middle-class peasant       | 10                    | 1                      | 1                     | 0                       | 1                              |                           |                           | 1                              | 10                                     |                           |                                  |                        | 428                                  |                                      |                                         |                                 | 25                                                    |                                          | 10                         | 3.57                                          | 357                                            | 403                       | 0.91                                         | 367                 |                                              | 723.73                             | 723.73                            |                                         |                                                | 403                      | 1.02                           | 411.06                         |                    | 303.43                              | 107.63                         | 418.80                           | 526.43                        |       |
| 154              | 1973 | Mneg Qingsheng                    | 2               | middle-class peasant       | 10                    | 1                      | 1                     | 0                       | 1                              |                           |                           | 1                              | 10                                     |                           |                                  |                        | 599                                  |                                      |                                         |                                 | 25                                                    |                                          | 10                         | 3.57                                          | 357                                            | 574                       | 0.91                                         | 522                 |                                              | 879.34                             | 879.34                            |                                         |                                                | 574                      | 1.02                           | 585.48                         |                    | 252.51                              | 332.97                         | 223.50                           | 556.47                        |       |
| 155              | 1973 | Meng Qingbao                      | 2               | middle-class peasant       | 10                    | 1                      | 1                     | 0                       | 2                              |                           |                           | 2                              | 20                                     |                           |                                  |                        | 295                                  |                                      |                                         |                                 | 25                                                    |                                          | 20                         | 3.57                                          | 714                                            | 270                       | 0.91                                         | 246                 |                                              | 959.7                              | 479.85                            |                                         |                                                | 270                      | 1.02                           | 275.40                         |                    | 194.27                              | 81.13                          | -225.82                          | -144.69                       |       |
| 156              | 1973 | Cao Jincheng                      | 2               | poor peasant               | 10                    | 1                      | 1                     | 0                       | 1                              |                           |                           | 1                              | 10                                     |                           |                                  |                        | 302                                  |                                      |                                         |                                 | 25                                                    |                                          | 10                         | 3.57                                          | 357                                            | 277                       | 0.91                                         | 252                 |                                              | 609.07                             | 609.07                            |                                         |                                                | 277                      | 1.02                           | 282.54                         |                    | 201.29                              | 81.25                          | 213.63                           | 294.88                        |       |
| 157              | 1973 | Cao Jinwei                        | 2               | poor peasant               | 12.5                  | 2                      | 1                     | 1                       | 2                              |                           |                           | 2                              | 20                                     |                           |                                  |                        | 364                                  |                                      |                                         |                                 | 31                                                    |                                          | 20                         | 3.57                                          | 714                                            | 333                       | 0.91                                         | 303                 |                                              | 1017.03                            | 508.515                           |                                         |                                                | 333                      | 1.02                           | 339.66                         |                    | 254.22                              | 85.44                          | 319.87                           | 405.31                        |       |
| 158              | 1973 | Meng Tianlai                      | 1               | middle-class peasant       | 14                    | 2                      | 1                     | 1                       | 4                              | 1                         |                           | 3                              | 34                                     |                           |                                  |                        | 726                                  |                                      |                                         |                                 | 35                                                    |                                          | 34                         | 3.57                                          | 1213.8                                         | 691                       | 0.94                                         | 650                 | 100                                          | 1963.34                            | 490.835                           |                                         |                                                | 691                      | 1.05                           | 725.55                         |                    | 475.86                              | 249.69                         | 122.89                           | 372.58                        |       |
| 159              | 1973 | Yu Guiying                        | 1               | poor peasant               |                       |                        |                       |                         |                                |                           |                           |                                |                                        |                           |                                  |                        |                                      |                                      |                                         |                                 |                                                       | 0                                        | 3.57                       | 0                                             | 0                                              | 0.94                      | 0                                            |                     | 0                                            |                                    |                                   |                                         | 0                                              | 1.05                     | 0.00                           |                                |                    | 7.67                                | -7.67                          | -460.48                          | -468.15                       |       |
| 160              | 1973 | Liu Chunxiao                      | 2               | upper-middle-class peasant | 14                    | 2                      | 1                     | 1                       | 4                              | 1                         |                           | 3                              | 34                                     |                           |                                  |                        | 604                                  |                                      |                                         |                                 | 35                                                    |                                          | 34                         | 3.57                                          | 1183.8                                         | 569                       | 0.91                                         | 518                 | 20                                           | 1721.59                            | 430.3975                          |                                         |                                                | 569                      | 1.02                           | 580.38                         |                    | 385.93                              | 194.45                         | 156.29                           | 350.74                        |       |
| 161              | 1973 | Meng Qinghua                      | 2               | low-middle-class peasant   | 8                     | 1                      | 1                     | 0                       | 1                              |                           |                           | 1                              | 10                                     |                           |                                  |                        | 144                                  |                                      |                                         |                                 | 20                                                    |                                          | 10                         | 3.57                                          | 357                                            | 124                       | 0.91                                         | 113                 |                                              | 469.84                             | 469.84                            |                                         |                                                | 124                      | 1.02                           | 126.48                         |                    | 140.64                              | -14.16                         | 193.72                           | 179.56                        |       |

(cont.)

| Household number | Year | Name of the head of the household | Production team | Class status (1)           | Basic work points (2) | Total labor forces (3) | Male labor forces (4) | Female labor forces (5) | Total household population (6) | Age: 1 to 3 years old (7) | Age: 4 to 7 years old (8) | Age: 8 years old and above (9) | Work points of grain distribution (10) | Laboring work points (11) | Farmyard work points (12) | Total work points (13) | Work points of compulsory labor (14) | Work points of help cultivation (15) | Work points of private plots labor (16) | Total deducted work points (17) | Actual workdays of participation in distribution (18) | Workpoints for rations distribution (19) | Rations per workpoint (20) | Total rations received from distribution (21) | Workdays of participation in distribution (22) | Grains per workpoint (23) | Total grains distributed by work-points (24) | Grains subsidy (25) | Total Grains received from distribution (26) | Distributed grains per person (27) | Distributed grains per adult (28) | Grains received from privated plots (29) | Workdays of participation in distribution (30) | Value per workpoint (31) | Total value of workpoints (32) | Money used for investment (33) | Sum of income (34) | Money distributed in this year (34) | Deposit/debt of this year (35) | Deposit/debt over the years (36) | Accumulated deposit/debt (37) |
|------------------|------|-----------------------------------|-----------------|----------------------------|-----------------------|------------------------|-----------------------|-------------------------|--------------------------------|---------------------------|---------------------------|--------------------------------|----------------------------------------|---------------------------|---------------------------|------------------------|--------------------------------------|--------------------------------------|-----------------------------------------|---------------------------------|-------------------------------------------------------|------------------------------------------|----------------------------|-----------------------------------------------|------------------------------------------------|---------------------------|----------------------------------------------|---------------------|----------------------------------------------|------------------------------------|-----------------------------------|------------------------------------------|------------------------------------------------|--------------------------|--------------------------------|--------------------------------|--------------------|-------------------------------------|--------------------------------|----------------------------------|-------------------------------|
| 162              | 1973 | Meng Peigui                       | 2               | rich peasant               | 12.5                  | 2                      | 1                     | 1                       | 2                              |                           |                           | 2                              | 20                                     |                           |                           |                        | 386                                  |                                      |                                         |                                 | 56                                                    | 20                                       | 3.57                       | 714                                           | 330                                            | 0.91                      | 300                                          |                     | 1014.3                                       | 507.15                             |                                   |                                          | 330                                            | 1.02                     | 336.60                         |                                | 253.21             | 83.39                               | 170.42                         | 253.81                           |                               |
| 163              | 1973 | Meng Peiji                        | 2               | rich peasant               | 16.5                  | 3                      | 1                     | 2                       | 7                              |                           |                           | 7                              | 70                                     |                           |                           |                        | 963                                  |                                      |                                         |                                 | 66                                                    | 70                                       | 3.57                       | 2499                                          | 897                                            | 0.91                      | 816                                          | 20                  | 3335.27                                      | 476.4671429                        |                                   |                                          | 897                                            | 1.02                     | 914.94                         |                                | 603.97             | 310.97                              | -53.10                         | 257.87                           |                               |
| 164              | 1973 | Meng Jinghuan                     | 2               | upper-middle-class peasant | 4                     | 1                      | 0                     | 1                       | 4                              | 1                         |                           | 3                              | 34                                     |                           |                           |                        | 279                                  |                                      |                                         |                                 | 10                                                    | 34                                       | 3.57                       | 1213.8                                        | 269                                            | 0.91                      | 245                                          |                     | 1458.59                                      | 364.6475                           |                                   |                                          | 269                                            | 1.02                     | 274.38                         |                                | 223.76             | 50.62                               | 83.37                          | 133.99                           |                               |
| 165              | 1973 | Lan Jinzhi                        | 1               | poor peasant               | 12.5                  | 2                      | 1                     | 1                       | 6                              |                           | 1                         | 5                              | 57                                     |                           |                           |                        | 682                                  |                                      |                                         |                                 | 31                                                    | 57                                       | 3.57                       | 2034.9                                        | 651                                            | 0.94                      | 612                                          |                     | 2646.84                                      | 441.14                             |                                   |                                          | 651                                            | 1.05                     | 683.55                         |                                | 559.16             | 124.39                              | 241.43                         | 365.82                           |                               |
| 166              | 1973 | Wang Jinshu                       | 2               | upper-middle-class peasant |                       |                        |                       |                         | 1                              |                           |                           | 1                              | 10                                     |                           |                           |                        |                                      |                                      |                                         |                                 | 10                                                    | 3.57                                     | 357                        | 0                                             | 0.91                                           | 0                         |                                              | 357                 | 357                                          |                                    |                                   | 0                                        | 1.02                                           | 0.00                     | 50.00                          | 41.38                          | 8.62               | -111.97                             | -103.35                        |                                  |                               |
| 167              | 1973 | Cao Xiangyun                      | 2               | upper-middle-class peasant | 12                    | 2                      | 1                     | 1                       | 6                              |                           | 1                         | 5                              | 57                                     |                           |                           |                        | 526                                  |                                      |                                         |                                 | 30                                                    | 57                                       | 3.57                       | 2034.9                                        | 496                                            | 0.91                      | 451                                          |                     | 2486.26                                      | 414.3766667                        |                                   |                                          | 496                                            | 1.02                     | 505.92                         | 107.00                         | 399.79             | 213.13                              | 48.76                          | 261.89                           |                               |
| 168              | 1973 | Li Shibao                         | 2               | poor peasant               | 14                    | 2                      | 1                     | 1                       | 9                              | 1                         | 1                         | 7                              | 81                                     |                           |                           |                        | 827                                  |                                      |                                         |                                 | 35                                                    | 81                                       | 3.57                       | 2891.7                                        | 792                                            | 0.91                      | 721                                          |                     | 3612.42                                      | 401.38                             |                                   |                                          | 792                                            | 1.02                     | 807.84                         |                                | 629.18             | 178.66                              | -1032.64                       | -853.98                          |                               |
| 169              | 1973 | Wang Kailu                        | 2               | poor peasant               | 18                    | 3                      | 2                     | 1                       | 6                              |                           | 1                         | 5                              | 57                                     |                           |                           |                        | 918                                  |                                      |                                         |                                 | 45                                                    | 57                                       | 3.57                       | 2034.9                                        | 873                                            | 0.91                      | 794                                          | 20                  | 2849.33                                      | 474.8883333                        |                                   |                                          | 873                                            | 1.02                     | 890.46                         |                                | 679.42             | 211.04                              | 479.01                         | 690.05                           |                               |
| 170              | 1973 | Zhao Hongrui                      | 1               | middle-class peasant       | 36.5                  | 5                      | 3                     | 2                       | 9                              | 1                         | 1                         | 7                              | 81                                     |                           |                           |                        | 1743                                 |                                      |                                         |                                 | 91                                                    | 81                                       | 3.57                       | 2891.7                                        | 1652                                           | 0.94                      | 1553                                         | 20                  | 4464.58                                      | 496.0644444                        |                                   |                                          | 1652                                           | 1.05                     | 1734.60                        |                                | 1087.00            | 647.60                              | 568.55                         | 1216.15                          |                               |
| 171              | 1973 | Fang Chunxing                     | 0               | middle-class peasant       |                       |                        |                       |                         |                                |                           |                           |                                |                                        |                           |                           |                        |                                      |                                      |                                         |                                 | 0                                                     | 3.57                                     | 0                          | 0                                             | 0.94                                           | 0                         |                                              | 0                   | #DIV/o!                                      |                                    |                                   | 0                                        |                                                | 0.00                     |                                | 0.00                           |                    | 0.00                                |                                |                                  |                               |
| 172              | 1973 | Zhao Honglin                      | 2               | middle-class peasant       | 4                     | 1                      | 0                     | 1                       | 5                              |                           | 1                         | 4                              | 47                                     |                           |                           |                        | 143                                  |                                      |                                         |                                 | 10                                                    | 47                                       | 3.57                       | 1677.9                                        | 133                                            | 0.91                      | 121                                          |                     | 1798.93                                      | 359.786                            |                                   |                                          | 133                                            | 1.02                     | 135.66                         | 200.00                         | 279.95             | 55.71                               | -202.23                        | -146.52                          |                               |
| 173              | 1973 | Yu Jinquan                        | 0               | poor peasant               |                       |                        |                       |                         |                                |                           |                           |                                |                                        |                           |                           |                        |                                      |                                      |                                         |                                 | 0                                                     | 3.57                                     | 0                          | 0                                             | 0.94                                           | 0                         |                                              | 0                   | #DIV/o!                                      |                                    |                                   | 0                                        |                                                | 0.00                     |                                | 0.00                           |                    | 0.00                                |                                |                                  |                               |
| 174              | 1973 | Yu Jinliang                       | 0               | poor peasant               |                       |                        |                       |                         |                                |                           |                           |                                |                                        |                           |                           |                        |                                      |                                      |                                         |                                 | 0                                                     | 3.57                                     | 0                          | 0                                             | 0.94                                           | 0                         |                                              | 0                   | #DIV/o!                                      |                                    |                                   | 0                                        |                                                | 0.00                     |                                | 0.00                           |                    | 0.00                                |                                |                                  |                               |
| 175              | 1973 | Mu Zhaoxin                        | 2               | poor peasant               | 4                     | 1                      | 0                     | 1                       | 2                              | 1                         |                           | 1                              | 14                                     |                           |                           |                        | 19                                   |                                      |                                         |                                 | 10                                                    | 14                                       | 3.57                       | 499.8                                         | 9                                              | 0.91                      | 8                                            |                     | 507.99                                       | 253.995                            |                                   |                                          | 9                                              | 1.02                     | 9.18                           | 40.00                          | 82.66              | -33.48                              | 20.64                          | -12.84                           |                               |
| 176              | 1973 | Wang Guijing                      | 0               | poor peasant               |                       |                        |                       |                         |                                |                           |                           |                                |                                        |                           |                           |                        |                                      |                                      |                                         |                                 | 0                                                     | 3.57                                     | 0                          | 0                                             | 0.94                                           | 0                         |                                              | 0                   | #DIV/o!                                      |                                    |                                   | 0                                        |                                                | 0.00                     |                                | 0.00                           |                    | 0.00                                |                                |                                  |                               |
| 177              | 1973 | Zhang Xuezhong                    | 1               | low-middle-class peasant   | 18                    | 3                      | 1                     | 2                       | 9                              | 1                         | 1                         | 7                              | 81                                     |                           |                           |                        | 811                                  |                                      |                                         |                                 | 45                                                    | 81                                       | 3.57                       | 2891.7                                        | 766                                            | 0.94                      | 720                                          |                     | 3611.74                                      | 401.3044444                        |                                   |                                          | 766                                            | 1.05                     | 804.30                         |                                | 673.92             | 130.38                              | -1401.76                       | -1271.38                         |                               |
| 178              | 1973 | Jia Anji                          | 2               | poor peasant               | 14                    | 2                      | 1                     | 1                       | 6                              | 1                         |                           | 5                              | 54                                     |                           |                           |                        | 698                                  |                                      |                                         |                                 | 35                                                    | 54                                       | 3.57                       | 1927.8                                        | 663                                            | 0.91                      | 603                                          | 20                  | 2551.13                                      | 425.1883333                        |                                   |                                          | 663                                            | 1.02                     | 676.26                         |                                | 552.38             | 123.88                              | 204.01                         | 327.89                           |                               |
| 179              | 1973 | Liu Peishou                       | 1               | middle-class peasant       | 18                    | 2                      | 2                     | 0                       | 4                              |                           |                           | 4                              | 40                                     |                           |                           |                        | 922                                  |                                      |                                         |                                 | 45                                                    | 40                                       | 3.57                       | 1428                                          | 877                                            | 0.94                      | 824                                          |                     | 2252.38                                      | 563.095                            |                                   |                                          | 877                                            | 1.05                     | 920.85                         |                                | 566.74             | 354.11                              | 563.98                         | 918.09                           |                               |
| 180              | 1973 | Gao Yunxian                       | 2               | middle-class peasant       | 24                    | 3                      | 2                     | 1                       | 8                              |                           |                           | 8                              | 80                                     |                           |                           |                        | 1050                                 |                                      |                                         |                                 | 60                                                    | 80                                       | 3.57                       | 2856                                          | 990                                            | 0.91                      | 901                                          | 120                 | 3876.9                                       | 484.6125                           |                                   |                                          | 990                                            | 1.02                     | 1009.80                        |                                | 914.90             | 94.90                               | 287.83                         | 382.73                           |                               |
| 181              | 1973 | Tian Kehua                        | 2               | middle-class peasant       |                       |                        |                       |                         | 1                              |                           |                           | 1                              | 10                                     |                           |                           |                        | 53                                   |                                      |                                         |                                 |                                                       | 10                                       | 3.57                       | 357                                           | 53                                             | 0.91                      | 48                                           |                     | 405.23                                       | 405.23                             |                                   |                                          | 53                                             | 1.02                     | 54.06                          |                                | 77.52              | -23.46                              | -32.18                         | -55.64                           |                               |
| 182              | 1973 | Tian Dawei                        | 1               | middle-class peasant       | 14                    | 2                      | 1                     | 1                       | 5                              | 2                         | 1                         | 3                              | 43                                     |                           |                           |                        | 666                                  |                                      |                                         |                                 | 35                                                    | 43                                       | 3.57                       | 1535.1                                        | 631                                            | 0.94                      | 593                                          | 20                  | 2148.24                                      | 429.648                            |                                   |                                          | 631                                            | 1.05                     | 662.55                         |                                | 437.04             | 225.51                              | -152.77                        | 72.74                            |                               |

(cont.)

| Household number | Year | Name of the head of the household | Production team | Class status (1)         | Basic work points (2) | Total labor forces (3) | Male labor forces (4) | Female labor forces (5) | Total household population (6) | Age: 1 to 3 years old (7) | Age: 4 to 7 years old (8) | Age: 8 years old and above (9) | Work points of grain distribution (10) | Laboring work points (11) | Farmyard manure work points (12) | Total work points (13) | Work points of compulsory labor (14) | Work points of help cultivation (15) | Work points of private plots labor (16) | Total deducted work points (17) | Acutal workdays of participation in distribution (18) | Workpoints for rations distribution (19) | Rations per workpoint (20) | Total rations received form distribution (21) | Workdays of participation in distribu-tion (22) | Grains per workpoint (23) | Total grains distributed by work-points (24) | Grains subsidy (25) | Total Grains received from distribution (26) | Distributed grains per person (27) | Distributed grains per adult (28) | Grains received from privated plots (29) | Workdays of participation in distribution (30) | Value per workpoint (31) | Total value of workpoints (32) | Money used for investment (33) | Sum of income | Money distributed in this year (34) | Deposit/ debt of this year (35) | Deposit/ debt over the years (36) | Accumulated deposit/debt (37) |         |
|------------------|------|-----------------------------------|-----------------|--------------------------|-----------------------|------------------------|-----------------------|-------------------------|--------------------------------|---------------------------|---------------------------|--------------------------------|----------------------------------------|---------------------------|----------------------------------|------------------------|--------------------------------------|--------------------------------------|-----------------------------------------|---------------------------------|-------------------------------------------------------|------------------------------------------|----------------------------|-----------------------------------------------|-------------------------------------------------|---------------------------|----------------------------------------------|---------------------|----------------------------------------------|------------------------------------|-----------------------------------|------------------------------------------|------------------------------------------------|--------------------------|--------------------------------|--------------------------------|---------------|-------------------------------------|---------------------------------|-----------------------------------|-------------------------------|---------|
| 183              | 1973 | Fan Liyuan                        | 2               | middle-class peasant     | 18                    | 2                      | 2                     | 0                       | 4                              |                           |                           | 4                              | 40                                     |                           |                                  |                        | 741                                  |                                      |                                         |                                 | 45                                                    |                                          | 40                         | 3.57                                          | 1428                                            | 696                       | 0.91                                         | 633                 |                                              | 2061.36                            | 515.34                            |                                          |                                                | 696                      | 1.02                           | 709.92                         |               |                                     | 541.78                          | 168.14                            | 529.04                        | 697.18  |
| 184              | 1973 | Fan Shutang                       | 1               | middle-class peasant     | 14                    | 2                      | 1                     | 1                       | 7                              | 1                         | 2                         | 4                              | 56                                     |                           |                                  |                        | 583                                  |                                      |                                         |                                 | 35                                                    |                                          | 56                         | 3.57                                          | 1999.2                                          | 548                       | 0.94                                         | 515                 | 100                                          | 2614.32                            | 373.4742857                       |                                          |                                                | 548                      | 1.05                           | 575.40                         |               |                                     | 523.07                          | 52.33                             | -165.23                       | -112.90 |
| 185              | 1973 | Fan Chunxiang                     | 1               | middle-class peasant     | 4                     | 1                      | 0                     | 1                       | 4                              | 1                         | 1                         | 2                              | 29                                     |                           |                                  |                        | 139                                  |                                      |                                         |                                 | 10                                                    |                                          | 29                         | 3.57                                          | 1035.3                                          | 129                       | 0.94                                         | 121                 |                                              | 1156.56                            | 289.14                            |                                          |                                                | 129                      | 1.05                           | 135.45                         | 50.00         |                                     | 199.89                          | -14.44                            | 38.75                         | 24.31   |
| 186              | 1973 | Lian Huaizhe                      | 1               | poor peasant             | 10.5                  | 2                      | 1                     | 1                       | 3                              |                           |                           | 3                              | 30                                     |                           |                                  |                        | 546                                  |                                      |                                         |                                 | 26                                                    |                                          | 30                         | 3.57                                          | 1071                                            | 520                       | 0.94                                         | 489                 |                                              | 1559.8                             | 519.9333333                       |                                          |                                                | 520                      | 1.05                           | 546.00                         |               |                                     | 379.22                          | 166.78                            | 125.53                        | 292.31  |
| 187              | 1973 | Lian Wenbing                      | 2               | poor peasant             | 14                    | 2                      | 1                     | 1                       | 5                              | 1                         | 1                         | 3                              | 41                                     |                           |                                  |                        | 345                                  |                                      |                                         |                                 | 35                                                    |                                          | 41                         | 3.57                                          | 1463.7                                          | 310                       | 0.91                                         | 282                 |                                              | 1745.8                             | 349.16                            |                                          |                                                | 310                      | 1.02                           | 316.20                         |               |                                     | 371.21                          | -55.01                            | -165.72                       | -220.73 |
| 188              | 1973 | Wu Congyi                         | 2               | poor peasant             | 14                    | 2                      | 1                     | 1                       | 7                              | 1                         | 2                         | 4                              | 56                                     |                           |                                  |                        | 531                                  |                                      |                                         |                                 | 35                                                    |                                          | 56                         | 3.57                                          | 1999.2                                          | 496                       | 0.91                                         | 451                 |                                              | 2450.56                            | 350.08                            |                                          |                                                | 496                      | 1.02                           | 505.92                         |               |                                     | 505.53                          | 0.39                              | -636.44                       | -636.05 |
| 189              | 1973 | Wu Laifu                          | 1               | poor peasant             | 14                    | 2                      | 1                     | 1                       | 6                              |                           | 2                         | 4                              | 54                                     |                           |                                  |                        | 451                                  |                                      |                                         |                                 | 35                                                    |                                          | 54                         | 3.57                                          | 1927.8                                          | 416                       | 0.94                                         | 391                 |                                              | 2318.84                            | 386.4733333                       |                                          |                                                | 416                      | 1.05                           | 436.80                         |               |                                     | 450.19                          | -13.39                            | -361.74                       | -375.13 |
| 190              | 1973 | Tian Dayu                         | 2               | poor peasant             |                       |                        |                       |                         | 1                              |                           |                           | 1                              | 10                                     |                           |                                  |                        | 359                                  |                                      |                                         |                                 |                                                       |                                          | 10                         | 3.57                                          | 357                                             | 359                       | 0.91                                         | 327                 |                                              | 683.69                             | 683.69                            |                                          |                                                | 359                      | 1.02                           | 366.18                         |               |                                     | 240.91                          | 125.27                            | 317.15                        | 442.42  |
| 191              | 1973 | Liu Shuting                       | 2               | poor peasant             | 4                     | 1                      | 0                     | 1                       | 5                              | 1                         | 1                         | 3                              | 39                                     |                           |                                  |                        | 185                                  |                                      |                                         |                                 | 10                                                    |                                          | 39                         | 3.57                                          | 1392.3                                          | 175                       | 0.91                                         | 159                 |                                              | 1551.55                            | 310.31                            |                                          |                                                | 175                      | 1.02                           | 178.50                         | 100.00        |                                     | 256.70                          | 21.80                             | 56.10                         | 77.90   |
| 192              | 1973 | Meng Tiande                       | 2               | poor peasant             | 14                    | 2                      | 1                     | 1                       | 7                              |                           |                           | 7                              | 70                                     |                           |                                  |                        | 795                                  |                                      |                                         |                                 | 35                                                    |                                          | 70                         | 3.57                                          | 2499                                            | 760                       | 0.91                                         | 692                 | 20                                           | 3210.6                             | 458.6571429                       |                                          |                                                | 760                      | 1.02                           | 775.20                         |               |                                     | 631.92                          | 143.28                            | -227.25                       | -83.97  |
| 193              | 1973 | Meng Xiulian                      | 2               | poor peasant             | 4                     | 1                      | 0                     | 1                       | 1                              |                           |                           | 1                              | 10                                     |                           |                                  |                        | 100                                  |                                      |                                         |                                 | 10                                                    |                                          | 10                         | 3.57                                          | 357                                             | 90                        | 0.91                                         | 82                  |                                              | 438.9                              | 438.9                             |                                          |                                                | 90                       | 1.02                           | 91.80                          |               |                                     | 81.41                           | 10.39                             | 29.24                         | 39.63   |
| 194              | 1973 | Tian Genlong                      | 2               | poor peasant             | 14                    | 2                      | 1                     | 1                       | 7                              | 1                         | 1                         | 5                              | 59                                     |                           |                                  |                        | 539                                  |                                      |                                         |                                 | 35                                                    |                                          | 59                         | 3.57                                          | 2106.3                                          | 504                       | 0.91                                         | 459                 |                                              | 2564.94                            | 366.42                            |                                          |                                                | 504                      | 1.02                           | 514.08                         |               |                                     | 486.61                          | 27.47                             | -411.03                       | -383.56 |
| 195              | 1973 | Zhao Jinlan                       | 2               | poor peasant             | 4                     | 1                      | 0                     | 1                       | 6                              | 1                         | 2                         | 3                              | 46                                     |                           |                                  |                        | 119                                  |                                      |                                         |                                 | 10                                                    |                                          | 46                         | 3.57                                          | 1642.2                                          | 109                       | 0.91                                         | 99                  | 180                                          | 1921.39                            | 320.2316667                       |                                          |                                                | 109                      | 1.02                           | 111.18                         | 165.00        |                                     | 315.00                          | -38.82                            | 26.36                         | -12.46  |
| 196              | 1973 | Liu Peiren                        | 2               | middle-class peasant     | 14                    | 2                      | 1                     | 1                       | 5                              | 1                         | 1                         | 3                              | 41                                     |                           |                                  |                        | 432                                  |                                      |                                         |                                 | 35                                                    |                                          | 41                         | 3.57                                          | 1463.7                                          | 397                       | 0.91                                         | 361                 |                                              | 1824.97                            | 364.994                           |                                          |                                                | 397                      | 1.02                           | 404.94                         |               |                                     | 375.74                          | 29.20                             | 70.84                         | 100.04  |
| 197              | 1973 | Liu Peizhu                        | 2               | middle-class peasant     | 10                    | 1                      | 1                     | 0                       | 2                              |                           |                           | 2                              | 20                                     |                           |                                  |                        | 485                                  |                                      |                                         |                                 | 25                                                    |                                          | 20                         | 3.57                                          | 714                                             | 460                       | 0.91                                         | 419                 |                                              | 1132.6                             | 566.3                             |                                          |                                                | 460                      | 1.02                           | 469.20                         |               |                                     | 308.42                          | 160.78                            | 190.65                        | 351.43  |
| 198              | 1973 | Liu Peijie                        | 2               | middle-class peasant     | 16                    | 3                      | 1                     | 2                       | 5                              | 1                         |                           | 4                              | 44                                     |                           |                                  |                        | 427                                  |                                      |                                         |                                 | 40                                                    |                                          | 44                         | 3.57                                          | 1570.8                                          | 387                       | 0.91                                         | 352                 |                                              | 1922.97                            | 384.594                           |                                          |                                                | 387                      | 1.02                           | 394.74                         | 10.00         |                                     | 359.24                          | 45.50                             | -128.08                       | -82.58  |
| 199              | 1973 | Meng Guilan                       | 2               | poor peasant             | 4                     | 1                      | 0                     | 1                       | 4                              |                           | 2                         | 2                              | 34                                     |                           |                                  |                        | 254                                  |                                      |                                         |                                 | 10                                                    |                                          | 34                         | 3.57                                          | 1213.8                                          | 244                       | 0.91                                         | 222                 |                                              | 1435.84                            | 358.96                            |                                          |                                                | 244                      | 1.02                           | 248.88                         | 60.51         |                                     | 222.52                          | 86.87                             | 19.70                         | 106.57  |
| 200              | 1973 | Wang Lianxiang                    | 2               | poor peasant             | 2.5                   | 1                      | 0                     | 1                       | 2                              |                           |                           | 2                              | 20                                     |                           |                                  |                        | 271                                  |                                      |                                         |                                 | 6                                                     |                                          | 20                         | 3.57                                          | 714                                             | 265                       | 0.91                                         | 241                 |                                              | 955.15                             | 477.575                           |                                          |                                                | 265                      | 1.02                           | 270.30                         |               |                                     | 252.83                          | 17.47                             | 100.52                        | 117.99  |
| 201              | 1973 | Wang Ende                         | 2               | poor peasant             |                       |                        |                       |                         | 1                              |                           |                           | 1                              | 10                                     |                           |                                  |                        |                                      |                                      |                                         |                                 |                                                       |                                          | 10                         | 3.57                                          | 357                                             | 0                         | 0.91                                         | 0                   |                                              | 357                                | 357                               |                                          |                                                | 0                        | 1.02                           | 0.00                           | 80.00         |                                     | 74.47                           | 5.53                              | 118.30                        | 123.83  |
| 202              | 1973 | Meng Mingqing                     | 2               | low-middle-class peasant |                       |                        |                       |                         | 2                              |                           |                           | 2                              | 20                                     |                           |                                  |                        | 427                                  |                                      |                                         |                                 | 20                                                    |                                          | 20                         | 3.57                                          | 714                                             | 407                       | 0.91                                         | 370                 |                                              | 1084.37                            | 542.185                           |                                          |                                                | 407                      | 1.02                           | 415.14                         |               |                                     | 300.40                          | 114.74                            | 279.93                        | 394.67  |
| 203              | 1973 | Meng Tianseng                     | 2               | low-middle-class peasant | 14                    | 2                      | 1                     | 1                       | 4                              | 1                         |                           | 3                              | 34                                     |                           |                                  |                        | 539                                  |                                      |                                         |                                 | 35                                                    |                                          | 34                         | 3.57                                          | 1213.8                                          | 504                       | 0.91                                         | 459                 |                                              | 1672.44                            | 418.11                            |                                          |                                                | 504                      | 1.02                           | 514.08                         |               |                                     | 390.71                          | 123.37                            | 169.32                        | 292.69  |
| 204              | 1973 | Wang Yueming                      | 2               | poor peasant             | 14.5                  | 3                      | 1                     | 2                       | 10                             | 1                         | 1                         | 8                              | 91                                     |                           |                                  |                        | 559                                  |                                      |                                         |                                 | 36                                                    |                                          | 91                         | 3.57                                          | 3248.7                                          | 523                       | 0.91                                         | 476                 |                                              | 3724.63                            | 372.463                           |                                          |                                                | 523                      | 1.02                           | 533.46                         | 20.00         |                                     | 559.25                          | -5.79                             | 216.11                        | 210.32  |
| 205              | 1973 | Wang Heshun                       | 2               | poor peasant             | 14.5                  | 2                      | 1                     | 1                       | 5                              |                           |                           | 5                              | 50                                     |                           |                                  |                        | 310                                  |                                      |                                         |                                 | 36                                                    |                                          | 50                         | 3.57                                          | 1785                                            | 274                       | 0.91                                         | 249                 | 20                                           | 2054.34                            | 410.868                           |                                          |                                                | 274                      | 1.02                           | 279.48                         |               |                                     | 465.30                          | -185.82                           | 266.85                        | 81.03   |

(cont.)

| Household number | Year | Name of the head of the household | Production team | Class status (1)           | Basic work points (2) | Total labor forces (3) | Male labor forces (4) | Female labor forces (5) | Total household population (6) | Age: 1 to 3 years old (7) | Age: 4 to 7 years old (8) | Age: 8 years old and above (9) | Work points of grain distribution (10) | Laboring work points (11) | Farmyard manure work points (12) | Total work points (13) | Work points of compulsory labor (14) | Work points of help cultivation (15) | Work points of private plots labor (16) | Total deducted work points (17) | Acutal workdays of participation in distribution (18) | Workpoints for rations distribution (19) | Rations per workpoint (20) | Total rations received form distribution (21) | Workdays of participation in distribu- tion (22) | Grains per workpoint (23) | Total grains distributed by work- points (24) | Grains subsidy (25) | Total Grains received from distribution (26) | Distributed grains per person (27) | Distributed grains per adult (28) | Grains received from privated plots (29) | Workdays of participation in distribution (30) | Value per workpoint (31) | Total value of workpoints (32) | Money used for investment (33) | Sum of income (34) | Money distributed in this year (34) | Deposit/ debt of this year (35) | Deposit/ debt over the years (36) | Accumulated deposit/debt (37) |
|------------------|------|-----------------------------------|-----------------|----------------------------|-----------------------|------------------------|-----------------------|-------------------------|--------------------------------|---------------------------|---------------------------|--------------------------------|----------------------------------------|---------------------------|----------------------------------|------------------------|--------------------------------------|--------------------------------------|-----------------------------------------|---------------------------------|-------------------------------------------------------|------------------------------------------|----------------------------|-----------------------------------------------|--------------------------------------------------|---------------------------|-----------------------------------------------|---------------------|----------------------------------------------|------------------------------------|-----------------------------------|------------------------------------------|------------------------------------------------|--------------------------|--------------------------------|--------------------------------|--------------------|-------------------------------------|---------------------------------|-----------------------------------|-------------------------------|
| 206              | 1973 | Wen Yingjie                       | 2               | upper-middle-class peasant | 14.5                  | 3                      | 1                     | 2                       | 4                              |                           |                           | 4                              | 40                                     |                           |                                  |                        | 771                                  |                                      |                                         |                                 | 36                                                    |                                          | 40                         | 3.57                                          | 1428                                             | 735                       | 0.91                                          | 669                 |                                              | 2096.85                            | 524.2125                          |                                          |                                                | 735                      | 1.02                           | 749.70                         |                    | 599.42                              | 150.28                          | 415.31                            | 565.59                        |
| 207              | 1973 | Liu Peiqian                       | 2               | low-middle-class peasant   | 22.5                  | 3                      | 2                     | 1                       | 8                              |                           |                           | 8                              | 80                                     |                           |                                  |                        | 1047                                 |                                      |                                         |                                 | 56                                                    |                                          | 80                         | 3.57                                          | 2856                                             | 991                       | 0.91                                          | 902                 | 20                                           | 3777.81                            | 472.22625                         |                                          |                                                | 991                      | 1.02                           | 1010.82                        |                    | 953.57                              | 57.25                           | 334.42                            | 391.67                        |
| 208              | 1973 | Liu Zhaoji                        | 2               | low-middle-class peasant   | 14                    | 2                      | 1                     | 1                       | 5                              | 2                         |                           | 3                              | 38                                     |                           |                                  |                        | 417                                  |                                      |                                         |                                 | 35                                                    |                                          | 38                         | 3.57                                          | 1356.6                                           | 382                       | 0.91                                          | 348                 | 20                                           | 1724.22                            | 344.844                           |                                          |                                                | 382                      | 1.02                           | 389.64                         |                    | 375.26                              | 14.38                           | 95.19                             | 109.57                        |
| 209              | 1973 | Yu Shengliang                     | 2               | poor peasant               | 4                     | 1                      | 0                     | 1                       | 3                              |                           |                           | 3                              | 30                                     |                           |                                  |                        | 472                                  |                                      |                                         |                                 | 10                                                    |                                          | 30                         | 3.57                                          | 1071                                             | 462                       | 0.91                                          | 420                 |                                              | 1491.42                            | 497.14                            |                                          |                                                | 462                      | 1.02                           | 471.24                         |                    | 333.78                              | 137.46                          | 140.25                            | 277.71                        |
| 210              | 1973 | Meng Tianyou                      | 1               | poor peasant               |                       |                        |                       |                         |                                |                           |                           | 1                              | 10                                     |                           |                                  |                        | 163                                  |                                      |                                         |                                 |                                                       |                                          | 10                         | 3.57                                          | 357                                              | 163                       | 0.94                                          | 153                 |                                              | 510.22                             | #DIV/0!                           |                                          |                                                | 163                      | 1.05                           | 171.15                         |                    | 110.95                              | 60.20                           | 122.46                            | 182.66                        |
| 211              | 1973 | Meng Tianfu                       | 2               | middle-class peasant       | 18.5                  | 4                      | 1                     | 3                       | 7                              |                           | 1                         | 6                              | 67                                     |                           |                                  |                        | 864                                  |                                      |                                         |                                 | 46                                                    |                                          | 67                         | 3.57                                          | 2391.9                                           | 818                       | 0.91                                          | 744                 | 100                                          | 3236.28                            | 462.3257143                       |                                          |                                                | 818                      | 1.02                           | 834.36                         |                    | 623.75                              | 210.61                          | -29.56                            | 181.05                        |
| 212              | 1973 | Meng Xisheng                      | 2               | middle-class peasant       | 14                    | 2                      | 1                     | 1                       | 5                              | 2                         | 1                         | 2                              | 35                                     |                           |                                  |                        | 637                                  |                                      |                                         |                                 | 35                                                    |                                          | 35                         | 3.57                                          | 1249.5                                           | 602                       | 0.91                                          | 548                 |                                              | 1797.32                            | 359.464                           |                                          |                                                | 602                      | 1.02                           | 614.04                         |                    | 507.03                              | 107.01                          | 62.07                             | 169.08                        |
| 213              | 1973 | Gui Tiankuan                      | 2               | poor peasant               | 28.5                  | 5                      | 2                     | 3                       | 9                              | 1                         |                           | 8                              | 84                                     |                           |                                  |                        | 1540                                 |                                      |                                         |                                 | 71                                                    |                                          | 84                         | 3.57                                          | 2998.8                                           | 1469                      | 0.91                                          | 1337                | 100                                          | 4435.59                            | 492.8433333                       |                                          |                                                | 1469                     | 1.02                           | 1498.38                        |                    | 1045.04                             | 453.34                          | 859.89                            | 1313.23                       |
| 214              | 1973 | Kang Huaizhi                      | 2               | poor peasant               | 14                    | 2                      | 1                     | 1                       | 8                              | 1                         | 2                         | 5                              | 68                                     |                           |                                  |                        | 812                                  |                                      |                                         |                                 | 35                                                    |                                          | 68                         | 3.57                                          | 2427.6                                           | 777                       | 0.91                                          | 707                 | 20                                           | 3154.67                            | 394.33375                         |                                          |                                                | 777                      | 1.02                           | 792.54                         |                    | 552.32                              | 240.22                          | -1492.59                          | -1252.37                      |
| 215              | 1973 | Liu Huaiqing                      | 2               | poor peasant               | 12                    | 2                      | 1                     | 1                       | 6                              | 1                         | 1                         | 4                              | 51                                     |                           |                                  |                        | 395                                  |                                      |                                         |                                 | 30                                                    |                                          | 51                         | 3.57                                          | 1820.7                                           | 365                       | 0.91                                          | 332                 |                                              | 2152.85                            | 358.8083333                       |                                          |                                                | 365                      | 1.02                           | 372.30                         | 140.33             | 332.38                              | 180.25                          | -100.33                           | 79.92                         |
| 216              | 1973 | Meng Xiuying                      | 2               | poor peasant               | 6.5                   | 2                      | 0                     | 2                       | 4                              | 1                         | 1                         | 2                              | 31                                     |                           |                                  |                        | 297                                  |                                      |                                         |                                 | 16                                                    |                                          | 31                         | 3.57                                          | 1106.7                                           | 281                       | 0.91                                          | 256                 |                                              | 1362.41                            | 340.6025                          |                                          |                                                | 281                      | 1.02                           | 286.62                         | 90.00              | 321.94                              | 54.68                           | 309.41                            | 364.09                        |
| 217              | 1973 | Meng Peiliang                     | 2               | middle-class peasant       | 34                    | 4                      | 3                     | 1                       | 9                              | 1                         | 2                         | 6                              | 78                                     |                           |                                  |                        | 1371                                 |                                      |                                         |                                 | 110                                                   |                                          | 78                         | 3.57                                          | 2784.6                                           | 1261                      | 0.91                                          | 1148                |                                              | 3932.11                            | 436.9011111                       |                                          |                                                | 1261                     | 1.02                           | 1286.22                        |                    | 955.62                              | 330.60                          | 619.56                            | 950.16                        |
| 218              | 1973 | Meng Mingcheng                    | 2               | middle-class peasant       | 22                    | 3                      | 2                     | 1                       | 4                              |                           |                           | 4                              | 40                                     |                           |                                  |                        | 927                                  |                                      |                                         |                                 | 55                                                    |                                          | 40                         | 3.57                                          | 1428                                             | 872                       | 0.91                                          | 794                 |                                              | 2221.52                            | 555.38                            |                                          |                                                | 872                      | 1.02                           | 889.44                         |                    | 492.84                              | 396.60                          | 273.05                            | 669.65                        |
| 219              | 1973 | Wu Shi'en                         | 1               | poor peasant               | 16                    | 3                      | 1                     | 2                       | 5                              | 1                         |                           | 4                              | 44                                     |                           |                                  |                        | 463                                  |                                      |                                         |                                 | 40                                                    |                                          | 44                         | 3.57                                          | 1570.8                                           | 423                       | 0.94                                          | 398                 |                                              | 1968.42                            | 393.684                           |                                          |                                                | 423                      | 1.05                           | 444.15                         |                    | 383.55                              | 60.60                           | -89.65                            | -29.05                        |
| 220              | 1973 | Wang Qingwen                      | 1               | poor peasant               | 12                    | 2                      | 1                     | 1                       | 4                              |                           |                           | 4                              | 40                                     |                           |                                  |                        | 858                                  |                                      |                                         |                                 | 30                                                    |                                          | 40                         | 3.57                                          | 1428                                             | 828                       | 0.94                                          | 778                 |                                              | 2206.32                            | 551.58                            |                                          |                                                | 828                      | 1.05                           | 869.40                         |                    | 581.96                              | 287.44                          | 293.47                            | 580.91                        |
| 221              | 1973 | Ji Chunmei                        | 1               | poor peasant               |                       |                        |                       |                         |                                |                           |                           |                                |                                        |                           |                                  |                        |                                      |                                      |                                         |                                 |                                                       | 0                                        | 3.57                       | 0                                             | 0                                                | 0.94                      | 0                                             |                     | 0                                            |                                    | 0                                 |                                          |                                                | 0                        | 1.05                           | 0.00                           | 1.00               | -1.00                               | -295.75                         | -296.75                           |                               |
| 222              | 1973 | Li Yushu                          | 1               | poor peasant               | 10                    | 1                      | 1                     | 0                       | 3                              |                           | 1                         | 2                              | 27                                     |                           |                                  |                        | 649                                  |                                      |                                         |                                 | 25                                                    |                                          | 27                         | 3.57                                          | 963.9                                            | 624                       | 0.94                                          | 587                 |                                              | 1550.46                            | 516.82                            |                                          |                                                | 624                      | 1.05                           | 655.20                         |                    | 392.28                              | 262.92                          | 319.62                            | 582.54                        |
| 223              | 1973 | Yu Zhenji                         | 2               | poor peasant               | 10                    | 1                      | 1                     | 0                       | 1                              |                           |                           | 1                              | 10                                     |                           |                                  |                        | 431                                  |                                      |                                         |                                 | 25                                                    |                                          | 10                         | 3.57                                          | 357                                              | 406                       | 0.91                                          | 369                 | 20                                           | 746.46                             | 746.46                            |                                          |                                                | 406                      | 1.02                           | 414.12                         |                    | 173.00                              | 241.12                          | -15.39                            | 225.73                        |
| 224              | 1973 | Meng Jinxi                        | 0               | poor peasant               |                       |                        |                       |                         |                                |                           |                           |                                |                                        |                           |                                  |                        |                                      |                                      |                                         |                                 |                                                       | 0                                        | 3.57                       | 0                                             | 0                                                | 0.94                      | 0                                             |                     | 0                                            |                                    | 0                                 |                                          |                                                | 0                        |                                | 0.00                           | 2.14               |                                     |                                 | 2.14                              |                               |
| 225              | 1973 | Li Guangkai                       | 1               | poor peasant               |                       |                        |                       |                         | 1                              |                           |                           | 1                              | 10                                     |                           |                                  |                        | 24                                   |                                      |                                         |                                 |                                                       | 10                                       | 3.57                       | 357                                           | 24                                               | 0.94                      | 23                                            |                     | 379.56                                       | 379.56                             |                                   |                                          | 24                                             | 1.05                     | 25.20                          |                                | 95.08              | -69.88                              | 73.94                           | 4.06                              |                               |
| 226              | 1973 | Liu Jigeng                        | 2               | poor peasant               | 24.5                  | 4                      | 2                     | 2                       | 7                              |                           | 1                         | 6                              | 67                                     |                           |                                  |                        | 1275                                 |                                      |                                         |                                 | 61                                                    |                                          | 67                         | 3.57                                          | 2391.9                                           | 1214                      | 0.91                                          | 1105                |                                              | 3496.64                            | 499.52                            |                                          |                                                | 1214                     | 1.02                           | 1238.28                        |                    | 1156.14                             | 82.14                           | 531.34                            | 613.48                        |
| 227              | 1973 | Fan Shuzhi                        | 1               | middle-class peasant       | 14                    | 2                      | 1                     | 1                       | 6                              | 1                         | 1                         | 4                              | 51                                     |                           |                                  |                        | 456                                  |                                      |                                         |                                 | 35                                                    |                                          | 51                         | 3.57                                          | 1820.7                                           | 421                       | 0.94                                          | 396                 |                                              | 2216.44                            | 369.4066667                       |                                          |                                                | 421                      | 1.05                           | 442.05                         |                    | 423.15                              | 18.90                           | -397.57                           | -378.67                       |
| 228              | 1973 | Ji Guanglian                      | 1               | low-middle-class peasant   | 4                     | 1                      | 0                     | 1                       | 4                              |                           | 2                         | 2                              | 34                                     |                           |                                  |                        | 26                                   |                                      |                                         |                                 | 10                                                    |                                          | 34                         | 3.57                                          | 1213.8                                           | 16                        | 0.94                                          | 15                  |                                              | 1228.84                            | 307.21                            |                                          |                                                | 16                       | 1.05                           | 16.80                          | 171.00             | 202.03                              | -14.23                          | 18.01                             | 3.78                          |

(cont.)

| Household number | Year | Name of the head of the household | Production team | Class status (1)         | Basic work points (2) | Total labor forces (3) | Male labor forces (4) | Female labor forces (5) | Total household population (6) | Age: 1 to 3 years old (7) | Age: 4 to 7 years old (8) | Age: 8 years old and above (9) | Work points of grain distribution (10) | Laboring work points (11) | Farmyard manure work points (12) | Total work points (13) | Work points of compulsory labor (14) | Work points of help cultivation (15) | Work points of private plots labor (16) | Total deducted work points (17) | Actual workdays of participation in distribution (18) | Workpoints for rations distribution (19) | Rations per workpoint (20) | Total rations received from distribution (21) | Workdays of participation in distribution (22) | Grains per workpoint (23) | Total grains distributed by work-points (24) | Grains subsidy (25) | Total Grains received from distribution (26) | Distributed grains per person (27) | Distributed grains per adult (28) | Grains received from private plots (29) | Workdays of participation in distribution (30) | Value per workpoint (31) | Total value of workpoints (32) | Money used for investment (33) | Sum of income (34) | Money distributed in this year (34) | Deposit/debt of this year (35) | Deposit/debt over the years (36) | Accumulated deposit/debt (37) |
|------------------|------|-----------------------------------|-----------------|--------------------------|-----------------------|------------------------|-----------------------|-------------------------|--------------------------------|---------------------------|---------------------------|--------------------------------|----------------------------------------|---------------------------|----------------------------------|------------------------|--------------------------------------|--------------------------------------|-----------------------------------------|---------------------------------|-------------------------------------------------------|------------------------------------------|----------------------------|-----------------------------------------------|------------------------------------------------|---------------------------|----------------------------------------------|---------------------|----------------------------------------------|------------------------------------|-----------------------------------|-----------------------------------------|------------------------------------------------|--------------------------|--------------------------------|--------------------------------|--------------------|-------------------------------------|--------------------------------|----------------------------------|-------------------------------|
| 229              | 1973 | Yang Xiaozhong                    | 1               | low-middle-class peasant | 14                    | 2                      | 1                     | 1                       | 4                              | 1                         | 1                         | 2                              | 31                                     |                           |                                  | 565                    |                                      |                                      |                                         | 35                              |                                                       | 31                                       | 3.57                       | 1106.7                                        | 530                                            | 0.94                      | 498                                          | 30                  | 1634.9                                       | 408.725                            |                                   |                                         | 530                                            | 1.05                     | 556.50                         |                                | 377.06             | 179.44                              | 140.56                         | 320.00                           |                               |
| 230              | 1973 | Meng Minghong                     | 2               | middle-class peasant     | 14                    | 2                      | 1                     | 1                       | 4                              | 1                         | 1                         | 2                              | 31                                     |                           |                                  | 570                    |                                      |                                      |                                         | 35                              |                                                       | 31                                       | 3.57                       | 1106.7                                        | 535                                            | 0.91                      | 487                                          | 100                 | 1693.55                                      | 423.3875                           |                                   |                                         | 535                                            | 1.02                     | 545.70                         |                                | 377.73             | 167.97                              | 166.57                         | 334.54                           |                               |
| 231              | 1973 | Zhang Xuewen                      | 0               | poor peasant             |                       |                        |                       |                         |                                |                           |                           |                                |                                        |                           |                                  |                        |                                      |                                      |                                         |                                 | 0                                                     | 3.57                                     | 0                          | 0                                             | 0.94                                           | 0                         |                                              | 0                   |                                              | #DIV/0!                            |                                   | 0                                       |                                                | 0.00                     |                                |                                | 0.00               |                                     | 0.00                           |                                  |                               |
| 232              | 1973 | Wu Jingxiu                        | 0               | middle-class peasant     |                       |                        |                       |                         |                                |                           |                           |                                |                                        |                           |                                  |                        |                                      |                                      |                                         |                                 | 0                                                     | 3.57                                     | 0                          | 0                                             | 0.94                                           | 0                         |                                              | 0                   |                                              | #DIV/0!                            |                                   | 0                                       |                                                | 0.00                     |                                |                                | 0.00               |                                     | 0.00                           |                                  |                               |
| 233              | 1973 | Fan Shugen                        | 1               | middle-class peasant     | 14                    | 2                      | 1                     | 1                       | 3                              |                           | 1                         | 2                              | 27                                     |                           |                                  | 610                    |                                      |                                      |                                         | 35                              |                                                       | 27                                       | 3.57                       | 963.9                                         | 575                                            | 0.94                      | 541                                          | 30                  | 1534.4                                       | 511.4666667                        |                                   |                                         | 575                                            | 1.05                     | 603.75                         |                                | 417.98             | 185.77                              | 256.06                         | 441.83                           |                               |
| 234              | 1973 | Yang Xiaoheng                     | 1               |                          |                       |                        |                       |                         |                                |                           |                           |                                |                                        |                           |                                  |                        |                                      |                                      |                                         |                                 | 0                                                     | 3.57                                     | 0                          | 0                                             | 0.94                                           | 0                         |                                              | 0                   |                                              | #DIV/0!                            |                                   | 0                                       |                                                | 1.05                     | 0.00                           |                                |                    | 0.00                                |                                | 0.00                             |                               |
| 235              | 1973 | Fan Xuewen                        | 1               |                          |                       |                        |                       |                         | 2                              |                           | 1                         | 1                              | 17                                     |                           |                                  | 71                     |                                      |                                      |                                         |                                 | 17                                                    | 3.57                                     | 606.9                      | 71                                            | 0.94                                           | 67                        |                                              | 673.64              | 336.82                                       |                                    |                                   | 71                                      | 1.05                                           | 74.55                    | 115.00                         | 112.26                         | 77.29              | -119.33                             | -42.04                         |                                  |                               |
| 236              | 1973 | Liu Yuzhen                        | 1               |                          |                       |                        |                       |                         |                                |                           |                           |                                |                                        |                           |                                  |                        |                                      |                                      |                                         |                                 | 0                                                     | 3.57                                     | 0                          | 0                                             | 0.94                                           | 0                         |                                              | 0                   |                                              | #DIV/0!                            |                                   | 0                                       |                                                | 1.05                     | 0.00                           |                                |                    | 0.00                                |                                | 0.00                             |                               |
| 237              | 1973 | Mu Chuncui                        | 1               | poor peasant             |                       |                        |                       |                         | 1                              |                           |                           | 1                              | 10                                     |                           |                                  |                        |                                      |                                      |                                         |                                 | 10                                                    | 3.57                                     | 357                        | 0                                             | 0.91                                           | 0                         |                                              | 357                 |                                              | 357                                |                                   | 0                                       |                                                | 1.02                     | 0.00                           | 36.67                          | 42.18              | -5.51                               | -36.67                         | -42.18                           |                               |
| 238              | 1973 | Meng Mingliang                    | 2               | poor peasant             |                       |                        |                       |                         | 1                              |                           |                           | 1                              | 10                                     |                           |                                  | 369                    |                                      |                                      |                                         |                                 | 10                                                    | 3.57                                     | 357                        | 369                                           | 0.91                                           | 336                       |                                              | 692.79              | 692.79                                       |                                    |                                   | 369                                     | 1.02                                           | 376.38                   |                                | 165.59                         | 210.79             | 219.62                              | 430.41                         |                                  |                               |
| 239              | 1973 | Wang Guilan                       | 1               | poor peasant             | 2.5                   | 1                      | 0                     | 1                       | 1                              |                           |                           | 1                              | 10                                     |                           |                                  | 229                    |                                      |                                      | 6                                       |                                 | 10                                                    | 3.57                                     | 357                        | 223                                           | 0.94                                           | 210                       |                                              | 566.62              | 566.62                                       |                                    |                                   | 223                                     | 1.05                                           | 234.15                   |                                | 208.31                         | 25.84              | 135.19                              | 161.03                         |                                  |                               |
| 240              | 1973 | Wang Chuanxian                    | 1               | poor peasant             | 14                    | 2                      | 1                     | 1                       | 6                              | 1                         | 2                         | 3                              | 46                                     |                           |                                  | 321                    |                                      |                                      |                                         | 35                              |                                                       | 46                                       | 3.57                       | 1642.2                                        | 286                                            | 0.94                      | 269                                          | 120                 | 2031.04                                      | 338.5066667                        |                                   |                                         | 286                                            | 1.05                     | 300.30                         |                                | 649.65             | -349.35                             | 148.10                         | -201.25                          |                               |
| 241              | 1973 | Wang Zhenquan                     | 1               | poor peasant             |                       |                        |                       |                         | 3                              |                           |                           | 3                              | 30                                     |                           |                                  | 331                    |                                      |                                      |                                         |                                 | 30                                                    | 3.57                                     | 1071                       | 331                                           | 0.94                                           | 311                       |                                              | 1382.14             | 460.7133333                                  |                                    |                                   | 331                                     | 1.05                                           | 347.55                   |                                | 345.06                         | 2.49               | 201.32                              | 203.81                         |                                  |                               |
| 243              | 1973 | Li Xiuying                        | 1               | poor peasant             |                       |                        |                       |                         |                                |                           |                           |                                |                                        |                           |                                  |                        |                                      |                                      |                                         |                                 | 0                                                     | 3.57                                     | 0                          | 0                                             | 0.94                                           | 0                         |                                              | 0                   |                                              |                                    |                                   | 0                                       |                                                | 1.05                     | 0.00                           |                                | 5.16               | -5.16                               | 5.16                           | 0.00                             |                               |
| 244              | 1973 | Meng Jingxi                       | 1               | poor peasant             |                       |                        |                       |                         |                                |                           |                           |                                |                                        |                           |                                  |                        |                                      |                                      |                                         |                                 | 0                                                     | 3.57                                     | 0                          | 0                                             | 0.94                                           | 0                         |                                              | 0                   |                                              | #DIV/0!                            |                                   | 0                                       |                                                | 1.05                     | 0.00                           |                                |                    | 0.00                                |                                | 0.00                             |                               |
| 245              | 1973 | Cao Jinren                        | 1               | poor peasant             |                       |                        |                       |                         |                                |                           |                           |                                |                                        |                           |                                  |                        |                                      |                                      |                                         |                                 | 0                                                     | 3.57                                     | 0                          | 0                                             | 0.94                                           | 0                         |                                              | 0                   |                                              | #DIV/0!                            |                                   | 0                                       |                                                | 1.05                     | 0.00                           |                                |                    | 0.00                                |                                | 0.00                             |                               |
| 247              | 1973 | Wu Jinggui                        | 1               | poor peasant             | 10                    | 1                      | 1                     | 0                       | 1                              |                           |                           | 1                              | 10                                     |                           |                                  | 520                    |                                      |                                      |                                         | 25                              |                                                       | 10                                       | 3.57                       | 357                                           | 495                                            | 0.94                      | 465                                          | 100                 | 922.3                                        | 922.3                              |                                   |                                         | 495                                            | 1.05                     | 519.75                         |                                | 519.75             |                                     |                                | 519.75                           |                               |
| 248              | 1973 | Zhang Yucang                      | 1               |                          |                       |                        |                       |                         |                                |                           |                           |                                |                                        |                           |                                  |                        |                                      |                                      |                                         |                                 | 0                                                     | 3.57                                     | 0                          | 0                                             | 0.94                                           | 0                         |                                              | 0                   |                                              | #DIV/0!                            |                                   | 0                                       |                                                | 1.05                     | 0.00                           |                                |                    | 0.00                                |                                | 0.00                             |                               |
| 249              | 1973 | Zhang Lirong                      | 2               | poor peasant             | 9                     | 3                      | 0                     | 3                       | 3                              |                           |                           | 3                              | 30                                     |                           |                                  | 364                    |                                      |                                      |                                         | 23                              |                                                       | 30                                       | 3.57                       | 1071                                          | 341                                            | 0.91                      | 310                                          |                     | 1381.31                                      | 460.4366667                        |                                   |                                         | 341                                            | 1.02                     | 347.82                         |                                | 329.78             | 18.04                               | 146.51                         | 164.55                           |                               |
| 250              | 1973 | Zhang Liwen                       | 2               | poor peasant             | 14                    | 2                      | 1                     | 1                       | 4                              | 1                         | 1                         | 2                              | 31                                     |                           |                                  | 523                    |                                      |                                      |                                         | 35                              |                                                       | 31                                       | 3.57                       | 1106.7                                        | 488                                            | 0.91                      | 444                                          |                     | 1550.78                                      | 387.695                            |                                   |                                         | 488                                            | 1.02                     | 497.76                         |                                | 328.77             | 168.99                              | 37.02                          | 206.01                           |                               |
| 251              | 1973 | Liu Ning                          | 2               |                          | 14                    | 2                      | 1                     | 1                       | 3                              | 1                         |                           | 2                              | 24                                     |                           |                                  | 583                    |                                      |                                      |                                         | 35                              |                                                       | 24                                       | 3.57                       | 856.8                                         | 548                                            | 0.91                      | 499                                          | 20                  | 1375.48                                      | 458.4933333                        |                                   |                                         | 548                                            | 1.02                     | 558.96                         |                                | 377.19             | 181.77                              | 263.15                         | 444.92                           |                               |
| 252              | 1973 | Niu Lanmei                        | 2               | poor peasant             | 4                     | 1                      | 0                     | 1                       | 2                              | 1                         |                           | 1                              | 14                                     |                           |                                  |                        |                                      |                                      |                                         | 10                              |                                                       | 14                                       | 3.57                       | 499.8                                         |                                                | 0.91                      | 0                                            |                     | 499.8                                        | 249.9                              |                                   | 0                                       |                                                | 1.02                     |                                |                                | 69.31              | -69.31                              | -57.25                         | -126.56                          |                               |
| 253              | 1973 | Meng Minglu                       | 2               | low-middle-class peasant | 40                    | 5                      | 4                     | 1                       | 6                              |                           |                           | 6                              | 60                                     |                           |                                  | 1707                   |                                      |                                      |                                         | 100                             |                                                       | 60                                       | 3.57                       | 2142                                          | 1607                                           | 0.91                      | 1462                                         |                     | 3604.37                                      | 600.7283333                        |                                   |                                         | 1607                                           | 1.02                     | 1639.14                        |                                | 1282.74            | 356.40                              | 1033.06                        | 1389.46                          |                               |
| 256              | 1973 | Cui Yongfu                        | 2               | poor peasant             |                       |                        |                       |                         |                                |                           |                           |                                |                                        |                           |                                  |                        |                                      |                                      |                                         |                                 | 0                                                     | 3.57                                     | 0                          | 0                                             | 0.91                                           | 0                         |                                              | 0                   |                                              | #DIV/0!                            |                                   | 0                                       |                                                | 1.02                     | 0.00                           |                                |                    | 0.00                                |                                | 0.00                             |                               |
| 257              | 1973 | An Guobao                         | 1               | teacher                  |                       |                        |                       |                         |                                |                           |                           |                                |                                        |                           |                                  |                        |                                      |                                      |                                         |                                 | 0                                                     | 3.57                                     | 0                          | 0                                             | 0.94                                           | 0                         |                                              | 0                   |                                              |                                    |                                   | 0                                       |                                                |                          | 15.44                          | 10.14                          | 5.30               | -38.75                              | -33.45                         |                                  |                               |
| 258              | 1973 | Liang Guangsheng                  |                 | teacher                  |                       |                        |                       |                         |                                |                           |                           |                                |                                        |                           |                                  |                        |                                      |                                      |                                         |                                 | 0                                                     | 3.57                                     | 0                          | 0                                             | 0.94                                           | 0                         |                                              | 0                   |                                              |                                    |                                   | 0                                       |                                                |                          | 0.00                           | 8.90                           |                    | 8.90                                | -47.42                         | -38.52                           |                               |
| 259              | 1973 | Liu Jinlian                       |                 | teacher                  |                       |                        |                       |                         |                                |                           |                           |                                |                                        |                           |                                  |                        |                                      |                                      |                                         |                                 | 0                                                     | 3.57                                     | 0                          | 0                                             | 0.94                                           | 0                         |                                              | 0                   |                                              |                                    |                                   | 0                                       |                                                |                          | 0.00                           | 21.35                          |                    | 21.35                               |                                |                                  | 21.35                         |

(cont.)

| Household number | Year | Name of the head of the household | Production team | Class status (1)         | Basic work points (2) | Total labor forces (3) | Male labor forces (4) | Female labor forces (5) | Total household population (6) | Age: 1 to 3 years old (7) | Age: 4 to 7 years old (8) | Age: 8 years old and above (9) | Work points of grain distribution (10) | Laboring work points (11) | Farmyard manure work points (12) | Total work points (13) | Work points of compulsory labor (14) | Work points of help cultivation (15) | Work points of private plots labor (16) | Total deducted work points (17) | Actual workdays of participation in distribution (18) | Workpoints for rations distribution (19) | Rations per workpoint (20) | Total rations received from distribution (21) | Workdays of participation in distribution (22) | Grains per workpoint (23) | Total grains distributed by work-points (24) | Grains subsidy (25) | Total Grains received from distribution (26) | Distributed grains per person (27) | Distributed grains per adult (28) | Grains received from privated plots (29) | Workdays of participation in distribution (30) | Value per workpoint (31) | Total value of workpoints (32) | Money used for investment (33) | Sum of income (34) | Money distributed in this year (34) | Deposit/ debt of this year (35) | Deposit/ debt over the years (36) | Accumulated deposit/debt (37) |
|------------------|------|-----------------------------------|-----------------|--------------------------|-----------------------|------------------------|-----------------------|-------------------------|--------------------------------|---------------------------|---------------------------|--------------------------------|----------------------------------------|---------------------------|----------------------------------|------------------------|--------------------------------------|--------------------------------------|-----------------------------------------|---------------------------------|-------------------------------------------------------|------------------------------------------|----------------------------|-----------------------------------------------|------------------------------------------------|---------------------------|----------------------------------------------|---------------------|----------------------------------------------|------------------------------------|-----------------------------------|------------------------------------------|------------------------------------------------|--------------------------|--------------------------------|--------------------------------|--------------------|-------------------------------------|---------------------------------|-----------------------------------|-------------------------------|
| 260              | 1973 | Liu Xuexu                         |                 | cadre                    |                       |                        |                       |                         |                                |                           |                           |                                |                                        |                           |                                  |                        |                                      |                                      |                                         |                                 |                                                       | 0                                        | 3.57                       | 0                                             | 0                                              | 0.94                      | 0                                            | 0                   |                                              |                                    | 0                                 |                                          |                                                | 0.00                     |                                |                                | 0.00               | -0.61                               | -0.61                           |                                   |                               |
| 261              | 1973 | Huang Qingxiang                   |                 | teacher                  |                       |                        |                       |                         |                                |                           |                           |                                |                                        |                           |                                  |                        |                                      |                                      |                                         |                                 |                                                       | 0                                        | 3.57                       | 0                                             | 0                                              | 0.94                      | 0                                            | 0                   |                                              |                                    | 0                                 |                                          |                                                | 0.00                     | 18.05                          |                                | 18.05              | -22.50                              | -4.45                           |                                   |                               |
| 262              | 1973 | Han Junxiu                        |                 | cadre                    |                       |                        |                       |                         |                                |                           |                           |                                |                                        |                           |                                  |                        |                                      |                                      |                                         |                                 |                                                       | 0                                        | 3.57                       | 0                                             | 0                                              | 0.94                      | 0                                            | 0                   |                                              |                                    | 0                                 |                                          |                                                | 0.00                     |                                | 0.00                           | -9.40              | -9.40                               |                                 |                                   |                               |
| 263              | 1973 | Li Yonggong                       |                 | cadre                    |                       |                        |                       |                         |                                |                           |                           |                                |                                        |                           |                                  |                        |                                      |                                      |                                         |                                 |                                                       | 0                                        | 3.57                       | 0                                             | 0                                              | 0.94                      | 0                                            | 0                   |                                              |                                    | 0                                 |                                          |                                                | 0.00                     | 29.08                          | 14.09                          | 14.99              | -29.08                              | -14.09                          |                                   |                               |
| 264              | 1973 | Ge Changliang                     |                 | teacher                  |                       |                        |                       |                         |                                |                           |                           |                                |                                        |                           |                                  |                        |                                      |                                      |                                         |                                 |                                                       | 0                                        | 3.57                       | 0                                             | 0                                              | 0.94                      | 0                                            | 0                   |                                              |                                    | 0                                 |                                          |                                                | 0.00                     |                                | 19.04                          | -19.04             |                                     | -19.04                          |                                   |                               |
| 1                | 1974 | Meng Tianyun                      | 1               | poor peasant             | 6.5                   | 2                      | 0                     | 2                       | 7                              | 1                         | 1                         | 5                              | 64                                     |                           |                                  |                        | 499                                  |                                      |                                         |                                 | 16                                                    | 64                                       | 35                         | 2240                                          | 483                                            | 1.20                      | 579                                          |                     | 2819                                         | 403                                |                                   | 656                                      | 483                                            | 1.1                      | 531.30                         |                                | 615.03             | -83.73                              | 259.72                          | 175.99                            |                               |
| 2                | 1974 | Yang Fengming                     | 1               | middle-class peasant     | 10.5                  | 2                      | 1                     | 1                       | 2                              |                           |                           | 2                              | 20                                     |                           |                                  |                        | 256                                  |                                      |                                         |                                 | 26                                                    | 20                                       | 35                         | 700                                           | 230                                            | 1.20                      | 276                                          |                     | 976                                          | 488                                |                                   | 164                                      | 230                                            | 1.1                      | 253.00                         |                                | 297.72             | -44.72                              | 202.37                          | 157.65                            |                               |
| 3                | 1974 | Li Chengxin                       | 1               | poor peasant             | 32                    | 4                      | 3                     | 1                       | 8                              |                           |                           | 8                              | 80                                     |                           |                                  |                        | 1001                                 |                                      |                                         |                                 | 80                                                    | 80                                       | 35                         | 2800                                          | 921                                            | 1.20                      | 1105                                         | 18                  | 3923                                         | 490.4                              |                                   | 656                                      | 921                                            | 1.1                      | 1013.10                        |                                | 1228.63            | -215.53                             | 201.56                          | -13.97                            |                               |
| 4                | 1974 | Li Zeying                         | 1               | poor peasant             | 14                    | 2                      | 1                     | 1                       | 5                              | 2                         |                           | 3                              | 42                                     |                           |                                  |                        | 506                                  |                                      |                                         |                                 | 35                                                    | 42                                       | 35                         | 1470                                          | 471                                            | 1.20                      | 565                                          | 18                  | 2053                                         | 410.64                             |                                   | 328                                      | 471                                            | 1.1                      | 518.10                         |                                | 467.71             | 50.39                               | -144.89                         | -94.50                            |                               |
| 5                | 1974 | Gao Peizhong                      | 1               | poor peasant             | 14                    | 2                      | 1                     | 1                       | 8                              | 1                         | 1                         | 6                              | 74                                     |                           |                                  |                        | 254                                  |                                      |                                         |                                 | 35                                                    | 74                                       | 35                         | 2590                                          | 219                                            | 1.20                      | 263                                          |                     | 2853                                         | 356.6                              |                                   | 656                                      | 219                                            | 1.1                      | 240.90                         |                                | 686.80             | -445.90                             | -670.31                         | -1116.21                          |                               |
| 6                | 1974 | Kong Qingquan                     | 1               | poor peasant             | 18                    | 3                      | 1                     | 2                       | 5                              |                           |                           | 5                              | 50                                     |                           |                                  |                        | 521                                  |                                      |                                         |                                 | 45                                                    | 50                                       | 35                         | 1750                                          | 476                                            | 1.20                      | 571                                          |                     | 2321                                         | 464.24                             |                                   | 410                                      | 476                                            | 1.1                      | 523.60                         |                                | 595.93             | -72.33                              | 431.57                          | 359.24                            |                               |
| 7                | 1974 | Li Chengren                       | 1               | middle-class peasant     |                       | 0                      |                       |                         | 2                              |                           |                           | 2                              | 20                                     |                           |                                  |                        | 55                                   |                                      |                                         |                                 |                                                       | 20                                       | 35                         | 700                                           | 55                                             | 1.20                      | 66                                           |                     | 766                                          | 383                                |                                   | 164                                      | 55                                             | 1.1                      | 60.50                          |                                | 177.74             | -117.24                             | -312.87                         | -430.11                           |                               |
| 8                | 1974 | Wu Jixiang                        | 1               | middle-class peasant     | 4                     | 1                      | 0                     | 1                       | 6                              | 1                         | 1                         | 4                              | 54                                     |                           |                                  |                        | 78                                   |                                      |                                         |                                 | 10                                                    | 54                                       | 35                         | 1873                                          | 68                                             | 1.20                      | 82                                           |                     | 1955                                         | 325.7666667                        |                                   | 410                                      | 68                                             | 1.1                      | 74.80                          | 280                            |                    | 362.37                              | -7.57                           | 65.87                             | 58.30                         |
| 9                | 1974 | Kong Fangyu                       | 1               | poor peasant             | 4                     | 1                      | 0                     | 1                       | 2                              |                           | 1                         | 1                              | 18                                     |                           |                                  |                        | 170                                  |                                      |                                         |                                 | 10                                                    | 18                                       | 35                         | 630                                           | 160                                            | 1.20                      | 192                                          |                     | 822                                          | 411                                |                                   | 164                                      | 160                                            | 1.1                      | 176.00                         |                                | 148.11             | 27.89                               | 48.94                           | 76.83                             |                               |
| 10               | 1974 | Gao Wei                           | 1               | poor peasant             | 16.5                  | 3                      | 1                     | 2                       | 4                              |                           |                           | 4                              | 40                                     |                           |                                  |                        | 738                                  |                                      |                                         |                                 | 41                                                    | 40                                       | 35                         | 1400                                          | 697                                            | 1.20                      | 836                                          |                     | 2236                                         | 559.1                              |                                   | 328                                      | 697                                            | 1.1                      | 766.70                         |                                | 760.49             | 6.21                                | 667.84                          | 674.05                            |                               |
| 11               | 1974 | Gao Jun                           | 1               | poor peasant             |                       | 0                      |                       |                         | 1                              |                           |                           | 1                              | 10                                     |                           |                                  |                        | 144                                  |                                      |                                         |                                 |                                                       | 10                                       | 35                         | 350                                           | 144                                            | 1.20                      | 173                                          |                     | 523                                          | 522.8                              |                                   | 82                                       | 144                                            | 1.1                      | 158.40                         |                                | 151.35             | 7.05                                | 134.74                          | 141.79                            |                               |
| 12               | 1974 | Gao Peixiao                       | 1               | poor peasant             | 14                    | 2                      | 1                     | 1                       | 6                              | 1                         | 1                         | 4                              | 54                                     |                           |                                  |                        | 607                                  |                                      |                                         |                                 | 35                                                    | 54                                       | 35                         | 1890                                          | 572                                            | 1.20                      | 686                                          | 18                  | 2594                                         | 432.4                              |                                   | 492                                      | 572                                            | 1.1                      | 629.20                         |                                | 769.78             | -140.58                             | 537.34                          | 396.76                            |                               |
| 13               | 1974 | Gao Shang                         | 1               | poor peasant             |                       | 0                      |                       |                         | 0                              |                           |                           |                                | 0                                      |                           |                                  |                        |                                      |                                      |                                         |                                 |                                                       | 0                                        | 35                         | 0                                             | 0                                              | 1.20                      | 0                                            |                     | 0                                            | #DIV/0!                            |                                   | 0                                        | 0                                              | 1.1                      | 0.00                           |                                | 0.00               | 0.00                                | 0.00                            |                                   |                               |
| 14               | 1974 | Mu Zhaolin                        | 1               | poor peasant             | 14                    | 2                      | 1                     | 1                       | 4                              | 1                         | 1                         | 2                              | 34                                     |                           |                                  |                        | 537                                  |                                      |                                         |                                 | 35                                                    | 34                                       | 35                         | 1190                                          | 502                                            | 1.20                      | 602                                          | 18                  | 1810                                         | 452.6                              |                                   | 328                                      | 502                                            | 1.1                      | 552.20                         |                                | 748.27             | -196.07                             | 453.82                          | 257.75                            |                               |
| 15               | 1974 | Cao Cuizhen                       | 2               | poor peasant             | 22.5                  | 3                      | 2                     | 1                       | 6                              |                           |                           | 6                              | 60                                     |                           |                                  |                        | 920                                  |                                      |                                         |                                 | 56                                                    | 60                                       | 35                         | 2100                                          | 864                                            | 1.05                      | 907                                          |                     | 3007                                         | 501.2                              |                                   | 492                                      | 864                                            | 1.04                     | 898.56                         |                                |                    | 898.56                              |                                 | 898.56                            |                               |
| 16               | 1974 | Cao Jianren                       | 2               | poor peasant             | 14                    | 2                      | 1                     | 1                       | 6                              |                           | 1                         | 5                              | 58                                     |                           |                                  |                        | 784                                  |                                      |                                         |                                 | 35                                                    | 58                                       | 35                         | 2030                                          | 749                                            | 1.05                      | 786                                          | 18                  | 2834                                         | 472.4083333                        |                                   | 492                                      | 749                                            | 1.04                     | 778.96                         | 80                             |                    | 873.99                              | -15.03                          | 283.88                            | 268.85                        |
| 17               | 1974 | Liu Guifu                         | 1               | poor peasant             |                       | 0                      |                       |                         | 0                              |                           |                           |                                | 0                                      |                           |                                  |                        |                                      |                                      |                                         |                                 |                                                       | 0                                        | 35                         | 0                                             | 0                                              | 1.20                      | 0                                            |                     | 0                                            | #DIV/0!                            |                                   | 0                                        | 0                                              | 1.1                      | 0.00                           |                                | 0.00               | 0.00                                | 0.00                            |                                   |                               |
| 18               | 1974 | Meng Mingde                       | 1               | poor peasant             | 32.5                  | 4                      | 2                     | 2                       | 8                              |                           | 1                         | 7                              | 78                                     |                           |                                  |                        | 1226                                 |                                      |                                         |                                 | 81                                                    | 78                                       | 35                         | 2730                                          | 1145                                           | 1.20                      | 1374                                         |                     | 4104                                         | 513                                |                                   | 656                                      | 1145                                           | 1.1                      | 1259.50                        |                                | 1058.74            | 200.76                              | 752.08                          | 952.84                            |                               |
| 19               | 1974 | Mu Shouliang                      | 1               | poor peasant             |                       | 0                      |                       |                         | 2                              |                           |                           | 2                              | 20                                     |                           |                                  |                        |                                      |                                      |                                         |                                 |                                                       | 20                                       | 35                         | 700                                           | 0                                              | 1.20                      | 0                                            |                     | 700                                          | 350                                |                                   | 164                                      | 0                                              | 1.1                      | 0.00                           |                                | 158.90             | -158.90                             | -235.92                         | -394.82                           |                               |
| 20               | 1974 | Meng Mingbao                      | 1               | poor peasant             | 20.5                  | 3                      | 2                     | 1                       | 3                              |                           |                           | 3                              | 30                                     |                           |                                  |                        | 588                                  |                                      |                                         |                                 | 51                                                    | 30                                       | 35                         | 1050                                          | 537                                            | 1.20                      | 644                                          |                     | 1694                                         | 564.8                              |                                   | 246                                      | 537                                            | 1.1                      | 590.70                         |                                | 654.55             | -63.85                              | 849.52                          | 785.67                            |                               |
| 21               | 1974 | Meng Mingjin                      | 1               | poor peasant             |                       | 0                      |                       |                         | 1                              |                           |                           | 1                              | 10                                     |                           |                                  |                        | 228                                  |                                      |                                         |                                 |                                                       | 10                                       | 35                         | 437                                           | 228                                            | 1.20                      | 274                                          |                     | 711                                          | 710.6                              |                                   | 164                                      | 228                                            | 1.1                      | 250.80                         |                                | 423.42             | -172.62                             | 286.70                          | 114.08                            |                               |
| 22               | 1974 | Liang Shiren                      | 1               | low-middle-class peasant |                       | 0                      |                       |                         | 2                              |                           |                           | 2                              | 20                                     |                           |                                  |                        |                                      |                                      |                                         |                                 |                                                       | 20                                       | 35                         | 700                                           | 0                                              | 1.20                      | 0                                            |                     | 700                                          | 350                                |                                   | 164                                      | 0                                              | 1.1                      | 0.00                           |                                | 152.24             | -152.24                             | -345.72                         | -497.96                           |                               |

(cont.)

| Household number | Year | Name of the head of the household | Production team | Class status (1)         | Basic work points (2) | Total labor forces (3) | Male labor forces (4) | Female labor forces (5) | Total household population (6) | Age: 1 to 3 years old (7) | Age: 4 to 7 years old (8) | Age: 8 years old and above (9) | Work points of grain distribution (10) | Laboring work points (11) | Farmyard manure work points (12) | Total work points (13) | Work points of compulsory labor (14) | Work points of help cultivation (15) | Work points of private plots labor (16) | Total deducted work points (17) | Acutal workdays of participation in distribution (18) | Workpoints for rations distribution (19) | Rations per workpoint (20) | Total rations received form distribution (21) | Workdays of participation in distribu-tion (22) | Grains per workpoint (23) | Total grains distributed by work-points (24) | Grains subsidy (25) | Total Grains received from distribution (26) | Distributed grains per person (27) | Distributed grains per adult (28) | Grains received from privated plots (29) | Workdays of participation in distribution (30) | Value per workpoint (31) | Total value of workpoints (32) | Money used for investment (33) | Sum of income | Money distributed in this year (34) | Deposit/ debt of this year (35) | Deposit/ debt over the years (36) | Accumulated deposit/debt (37) |
|------------------|------|-----------------------------------|-----------------|--------------------------|-----------------------|------------------------|-----------------------|-------------------------|--------------------------------|---------------------------|---------------------------|--------------------------------|----------------------------------------|---------------------------|----------------------------------|------------------------|--------------------------------------|--------------------------------------|-----------------------------------------|---------------------------------|-------------------------------------------------------|------------------------------------------|----------------------------|-----------------------------------------------|-------------------------------------------------|---------------------------|----------------------------------------------|---------------------|----------------------------------------------|------------------------------------|-----------------------------------|------------------------------------------|------------------------------------------------|--------------------------|--------------------------------|--------------------------------|---------------|-------------------------------------|---------------------------------|-----------------------------------|-------------------------------|
| 23               | 1974 | Liang Yingfu                      | 1               | low-middle-class peasant | 10                    | 1                      | 1                     | 0                       | 4                              |                           |                           | 4                              | 40                                     |                           |                                  |                        | 577                                  |                                      |                                         | 25                              |                                                       | 40                                       | 35                         | 1400                                          | 552                                             | 1.20                      | 662                                          | 18                  | 2080                                         | 520.1                              |                                   | 328                                      | 552                                            | 1.1                      | 607.20                         |                                | 489.08        | 118.12                              | -27.72                          | 90.40                             |                               |
| 24               | 1974 | Lei Guangzhi                      | 1               | low-middle-class peasant | 16                    | 2                      | 2                     | 0                       | 2                              |                           |                           | 2                              | 20                                     |                           |                                  |                        | 443                                  |                                      |                                         | 40                              |                                                       | 20                                       | 35                         | 700                                           | 403                                             | 1.20                      | 484                                          |                     | 1184                                         | 591.8                              |                                   | 164                                      | 403                                            | 1.1                      | 443.30                         |                                | 288.34        | 154.96                              | -602.62                         | -447.66                           |                               |
| 25               | 1974 | Fan Lishi                         | 1               | middle-class peasant     | 28.5                  | 5                      | 2                     | 3                       | 9                              | 1                         |                           | 8                              | 86                                     |                           |                                  |                        | 1085                                 |                                      |                                         | 71                              |                                                       | 86                                       | 35                         | 2950                                          | 1014                                            | 1.20                      | 1217                                         | 18                  | 4185                                         | 464.9777778                        |                                   | 574                                      | 1014                                           | 1.1                      | 1115.40                        | 40.75                          | 977.63        | 178.52                              | 699.64                          | 878.16                            |                               |
| 26               | 1974 | Zhang Quanguai                    | 2               | middle-class peasant     |                       | 0                      |                       |                         | 1                              |                           |                           | 1                              | 10                                     |                           |                                  |                        | 2                                    |                                      |                                         | 10                              |                                                       | 35                                       | 350                        | 2                                             | 1.05                                            | 2                         |                                              | 352                 | 352.1                                        |                                    | 82                                | 2                                        | 1.04                                           | 2.08                     |                                | 77.99                          | -75.91        | -159.53                             | -235.44                         |                                   |                               |
| 27               | 1974 | Wang Bangjie                      | 1               | low-middle-class peasant | 14                    | 2                      | 1                     | 1                       | 4                              | 1                         |                           | 3                              | 36                                     |                           |                                  |                        | 555                                  |                                      |                                         | 35                              |                                                       | 36                                       | 35                         | 1260                                          | 520                                             | 1.20                      | 624                                          | 18                  | 1902                                         | 475.5                              |                                   | 328                                      | 520                                            | 1.1                      | 572.00                         |                                | 597.47        | -25.47                              | 188.66                          | 163.19                            |                               |
| 28               | 1974 | Meng Tianxing                     | 1               | low-middle-class peasant | 14                    | 2                      | 1                     | 1                       | 7                              | 1                         | 2                         | 4                              | 62                                     |                           |                                  |                        | 450                                  |                                      |                                         | 35                              |                                                       | 62                                       | 35                         | 2102                                          | 415                                             | 1.20                      | 498                                          |                     | 2600                                         | 371.4285714                        |                                   | 492                                      | 415                                            | 1.1                      | 456.50                         |                                | 560.26        | -103.76                             | 5.17                            | -98.59                            |                               |
| 29               | 1974 | Xue Baolin                        | 1               | low-middle-class peasant | 4                     | 1                      | 0                     | 1                       | 5                              |                           | 1                         | 4                              | 48                                     |                           |                                  |                        | 48                                   |                                      |                                         | 10                              |                                                       | 48                                       | 35                         | 1680                                          | 38                                              | 1.20                      | 46                                           |                     | 1726                                         | 345.12                             |                                   | 410                                      | 38                                             | 1.1                      | 41.80                          | 400                            | 331.75        | 110.05                              | 5.92                            | 115.97                            |                               |
| 30               | 1974 | Cao Cuiheng                       | 1               | low-middle-class peasant | 2.5                   | 1                      | 0                     | 1                       | 2                              |                           |                           | 2                              | 20                                     |                           |                                  |                        | 284                                  |                                      |                                         | 4                               |                                                       | 20                                       | 35                         | 700                                           | 280                                             | 1.20                      | 336                                          |                     | 1036                                         | 518                                |                                   | 164                                      | 280                                            | 1.1                      | 308.00                         |                                | 257.76        | 50.24                               | 262.41                          | 312.65                            |                               |
| 31               | 1974 | Ma Hongxiang                      | 1               | low-middle-class peasant | 4                     | 1                      | 0                     | 1                       | 3                              | 1                         | 1                         | 1                              | 24                                     |                           |                                  |                        | 99                                   |                                      |                                         | 10                              |                                                       | 24                                       | 35                         | 840                                           | 89                                              | 1.20                      | 107                                          |                     | 947                                          | 315.6                              |                                   | 246                                      | 89                                             | 1.1                      | 97.90                          |                                | 182.09        | -84.19                              | 36.79                           | -47.40                            |                               |
| 32               | 1974 | Ruan Baorong                      | 1               | low-middle-class peasant | 22                    | 3                      | 2                     | 1                       | 4                              |                           |                           | 4                              | 40                                     |                           |                                  |                        | 1070                                 |                                      |                                         | 20                              |                                                       | 40                                       | 35                         | 1400                                          | 1050                                            | 1.20                      | 1260                                         |                     | 2660                                         | 665                                |                                   | 492                                      | 1050                                           | 1.1                      | 1155.00                        |                                | 910.77        | 244.23                              | 991.63                          | 1235.86                           |                               |
| 33               | 1974 | Cao Qiguo                         | 1               | low-middle-class peasant | 14                    | 2                      | 1                     | 1                       | 8                              | 1                         | 2                         | 5                              | 72                                     |                           |                                  |                        | 502                                  |                                      |                                         | 35                              |                                                       | 72                                       | 35                         | 2520                                          | 467                                             | 1.20                      | 560                                          | 18                  | 3098                                         | 387.3                              |                                   | 574                                      | 467                                            | 1.1                      | 513.70                         |                                | 706.41        | -192.71                             | -21.79                          | -214.50                           |                               |
| 34               | 1974 | Liu Jinliang                      | 1               | poor peasant             | 2.5                   | 1                      | 0                     | 1                       | 5                              |                           |                           | 5                              | 50                                     |                           |                                  |                        | 614                                  |                                      |                                         |                                 |                                                       | 50                                       | 35                         | 1750                                          | 614                                             | 1.20                      | 737                                          |                     | 2487                                         | 497.36                             |                                   | 410                                      | 614                                            | 1.1                      | 675.40                         |                                | 733.09        | -57.69                              | 743.40                          | 685.71                            |                               |
| 35               | 1974 | Shi Baoshou                       | 1               | low-middle-class peasant | 16                    | 3                      | 1                     | 2                       | 8                              | 1                         | 1                         | 6                              | 74                                     |                           |                                  |                        | 663                                  |                                      |                                         | 40                              |                                                       | 74                                       | 35                         | 2590                                          | 623                                             | 1.20                      | 748                                          |                     | 3338                                         | 417.2                              |                                   | 574                                      | 623                                            | 1.1                      | 685.30                         |                                | 769.47        | -84.17                              | -1047.63                        | -1131.80                          |                               |
| 36               | 1974 | Wang Qiding                       | 2               | low-middle-class peasant | 12.5                  | 2                      | 1                     | 1                       | 2                              |                           |                           | 2                              | 20                                     |                           |                                  |                        | 144                                  |                                      |                                         | 31                              |                                                       | 20                                       | 35                         | 700                                           | 113                                             | 1.05                      | 119                                          |                     | 819                                          | 409.325                            |                                   | 164                                      | 113                                            | 1.04                     | 117.52                         |                                | 189.19        | -71.67                              | 71.10                           | -0.57                             |                               |
| 37               | 1974 | Yu Zhankui                        | 1               | poor peasant             | 4                     | 1                      | 0                     | 1                       | 5                              | 1                         | 1                         | 3                              | 44                                     |                           |                                  |                        | 38                                   |                                      |                                         | 10                              |                                                       | 44                                       | 35                         | 1540                                          | 28                                              | 1.20                      | 34                                           |                     | 1574                                         | 314.72                             |                                   | 410                                      | 28                                             | 1.1                      | 30.80                          | 230                            | 331.84        | -71.04                              | -397.34                         | -468.38                           |                               |
| 38               | 1974 | Liu Yucan                         | 1               | poor peasant             | 14                    | 2                      | 1                     | 1                       | 6                              | 1                         | 1                         | 4                              | 54                                     |                           |                                  |                        | 502                                  |                                      |                                         | 10                              |                                                       | 54                                       | 35                         | 1890                                          | 492                                             | 1.20                      | 590                                          |                     | 2480                                         | 413.4                              |                                   | 492                                      | 492                                            | 1.1                      | 541.20                         |                                | 672.97        | -131.77                             | -272.18                         | -403.95                           |                               |
| 39               | 1974 | Liu Guiting                       | 1               | middle-class peasant     |                       | 0                      |                       |                         | 3                              |                           |                           | 3                              | 30                                     |                           |                                  |                        | 462                                  |                                      |                                         |                                 |                                                       | 30                                       | 35                         | 1050                                          | 462                                             | 1.20                      | 554                                          |                     | 1604                                         | 534.8                              |                                   | 246                                      | 462                                            | 1.1                      | 508.20                         |                                | 468.72        | 39.48                               | 359.83                          | 399.31                            |                               |



(cont.)

| Household number | Year | Name of the head of the household | Production team | Class status (1)           | Basic work points (2) | Total labor forces (3) | Male labor forces (4) | Female labor forces (5) | Total household population (6) | Age: 1 to 3 years old (7) | Age: 4 to 7 years old (8) | Age: 8 years old and above (9) | Work points of grain distribution (10) | Laboring work points (11) | Farmyard manure work points (12) | Total work points (13) | Work points of compulsory labor (14) | Work points of help cultivation (15) | Work points of private plots labor (16) | Total deducted work points (17) | Actual workdays of participation in distribution (18) | Workpoints for rations distribution (19) | Rations per workpoint (20) | Total rations received from distribution (21) | Workdays of participation in distribution (22) | Grains per workpoint (23) | Total grains distributed by work-points (24) | Grains subsidy (25) | Total Grains received from distribution (26) | Distributed grains per person (27) | Distributed grains per adult (28) | Grains received from private plots (29) | Workdays of participation in distribution (30) | Value per workpoint (31) | Total value of workpoints (32) | Money used for investment (33) | Sum of income (34) | Money distributed in this year (34) | Deposit/debt of this year (35) | Deposit/debt over the years (36) | Accumulated deposit/debt (37) |
|------------------|------|-----------------------------------|-----------------|----------------------------|-----------------------|------------------------|-----------------------|-------------------------|--------------------------------|---------------------------|---------------------------|--------------------------------|----------------------------------------|---------------------------|----------------------------------|------------------------|--------------------------------------|--------------------------------------|-----------------------------------------|---------------------------------|-------------------------------------------------------|------------------------------------------|----------------------------|-----------------------------------------------|------------------------------------------------|---------------------------|----------------------------------------------|---------------------|----------------------------------------------|------------------------------------|-----------------------------------|-----------------------------------------|------------------------------------------------|--------------------------|--------------------------------|--------------------------------|--------------------|-------------------------------------|--------------------------------|----------------------------------|-------------------------------|
| 40               | 1974 | Liu Chengze                       | 1               | middle-class peasant       |                       | 0                      |                       |                         | 1                              |                           |                           | 1                              | 10                                     |                           |                                  |                        | 137                                  |                                      |                                         |                                 |                                                       | 10                                       | 35                         | 350                                           | 137                                            | 1.20                      | 164                                          |                     | 514                                          | 514.4                              |                                   | 82                                      | 137                                            | 1.1                      | 150.70                         |                                | 133.02             | 17.68                               | 96.99                          | 114.67                           |                               |
| 41               | 1974 | Li Jinhu                          | 1               | middle-class peasant       | 10                    | 1                      | 1                     | 0                       | 3                              |                           |                           | 3                              | 30                                     |                           |                                  |                        | 450                                  |                                      |                                         |                                 | 25                                                    |                                          | 30                         | 35                                            | 1050                                           | 425                       | 1.20                                         | 510                 |                                              | 1560                               | 520                               |                                         | 246                                            | 425                      | 1.1                            | 467.50                         |                    | 486.77                              | -19.27                         | 420.83                           | 401.56                        |
| 42               | 1974 | Meng Xiqing                       | 2               | poor peasant               | 22                    | 3                      | 2                     | 1                       | 7                              |                           | 1                         | 6                              | 68                                     |                           |                                  |                        | 1079                                 |                                      |                                         |                                 | 55                                                    |                                          | 68                         | 35                                            | 2380                                           | 1024                      | 1.05                                         | 1075                |                                              | 3455                               | 493.6                             |                                         | 574                                            | 1024                     | 1.04                           | 1064.96                        | 50                 | 862.57                              | 252.39                         | 150.38                           | 402.77                        |
| 43               | 1974 | Li Shucheng                       | 1               | poor peasant               | 14                    | 2                      | 1                     | 1                       | 5                              |                           |                           | 5                              | 50                                     |                           |                                  |                        | 919                                  |                                      |                                         |                                 |                                                       | 50                                       | 35                         | 1750                                          | 919                                            | 1.20                      | 1103                                         |                     | 2853                                         | 570.56                             |                                   | 574                                     | 919                                            | 1.1                      | 1010.90                        |                                | 1031.07            | -20.17                              | 807.64                         | 787.47                           |                               |
| 44               | 1974 | Wang Guiying                      | 1               | low-middle-class peasant   | 18                    | 3                      | 1                     | 2                       | 4                              | 1                         |                           | 3                              | 36                                     |                           |                                  |                        | 644                                  |                                      |                                         |                                 | 45                                                    |                                          | 36                         | 35                                            | 1260                                           | 599                       | 1.20                                         | 719                 | 18                                           | 1997                               | 499.2                             |                                         | 246                                            | 599                      | 1.1                            | 658.90                         |                    | 609.07                              | 49.83                          | 400.69                           | 450.52                        |
| 45               | 1974 | Zuo Yunxian                       | 1               | upper-middle-class peasant | 36                    | 6                      | 2                     | 4                       | 10                             | 1                         |                           | 9                              | 96                                     |                           |                                  |                        | 1464                                 |                                      |                                         |                                 | 90                                                    |                                          | 96                         | 35                                            | 3360                                           | 1374                      | 1.20                                         | 1649                | 18                                           | 5027                               | 502.68                            |                                         | 738                                            | 1374                     | 1.1                            | 1511.40                        |                    | 1390.75                             | 120.65                         | 1210.42                          | 1331.07                       |
| 46               | 1974 | Gao Peijie                        | 1               | poor peasant               | 10                    | 1                      | 1                     | 0                       | 2                              |                           |                           | 2                              | 20                                     |                           |                                  |                        | 237                                  |                                      |                                         |                                 | 25                                                    |                                          | 20                         | 35                                            | 700                                            | 212                       | 1.20                                         | 254                 |                                              | 954                                | 477.2                             |                                         | 164                                            | 212                      | 1.1                            | 233.20                         |                    | 295.31                              | -62.11                         | 155.70                           | 93.59                         |
| 47               | 1974 | Wang Qisheng                      | 1               | poor peasant               | 12.5                  | 2                      | 1                     | 1                       | 6                              | 1                         |                           | 5                              | 56                                     |                           |                                  |                        | 431                                  |                                      |                                         |                                 | 31                                                    |                                          | 56                         | 35                                            | 1960                                           | 400                       | 1.20                                         | 492                 |                                              | 2452                               | 408.6666667                       |                                         | 492                                            | 400                      | 1.1                            | 440.00                         |                    | 541.97                              | -101.97                        | -589.18                          | -691.15                       |
| 48               | 1974 | Chen Yuzhong                      | 2               | poor peasant               | 18                    | 3                      | 1                     | 2                       | 6                              |                           |                           | 6                              | 60                                     |                           |                                  |                        | 665                                  |                                      |                                         |                                 | 45                                                    |                                          | 60                         | 35                                            | 2100                                           | 620                       | 1.05                                         | 651                 |                                              | 2751                               | 458.5                             |                                         | 492                                            | 620                      | 1.04                           | 644.80                         |                    | 655.51                              | -10.71                         | 51.62                            | 40.91                         |
| 49               | 1974 | Meng Tianchang                    | 2               | poor peasant               | 14                    | 2                      | 1                     | 1                       | 6                              | 1                         | 2                         | 3                              | 52                                     |                           |                                  |                        | 445                                  |                                      |                                         |                                 | 35                                                    |                                          | 52                         | 35                                            | 1820                                           | 410                       | 1.05                                         | 431                 |                                              | 2251                               | 375.0833333                       |                                         | 410                                            | 410                      | 1.04                           | 426.40                         |                    | 571.33                              | -144.93                        | -110.09                          | -255.02                       |
| 50               | 1974 | Wang Xizhi                        | 2               | middle-class peasant       | 14.5                  | 3                      | 1                     | 2                       | 5                              |                           |                           | 5                              | 50                                     |                           |                                  |                        | 694                                  |                                      |                                         |                                 | 36                                                    |                                          | 50                         | 35                                            | 1750                                           | 658                       | 1.05                                         | 691                 |                                              | 2441                               | 488.18                            |                                         | 492                                            | 658                      | 1.04                           | 684.32                         |                    | 595.85                              | 88.47                          | 197.39                           | 285.86                        |
| 51               | 1974 | Jia Jinkui                        | 2               | low-middle-class peasant   |                       | 0                      |                       |                         | 0                              |                           |                           |                                | 0                                      |                           |                                  |                        |                                      |                                      |                                         |                                 |                                                       | 0                                        | 35                         | 0                                             | 0                                              | 1.05                      | 0                                            |                     | 0                                            | #DIV/0!                            | 82                                | 0                                       | 0                                              | 1.04                     | 0.00                           |                                | 8.25               | -8.25                               | -829.45                        | -837.70                          |                               |
| 52               | 1974 | Ji Yunxian                        | 2               | poor peasant               | 8                     | 1                      | 1                     | 0                       | 1                              |                           |                           | 1                              | 10                                     |                           |                                  |                        | 330                                  |                                      |                                         |                                 | 20                                                    |                                          | 10                         | 35                                            | 350                                            | 310                       | 1.05                                         | 326                 |                                              | 676                                | 675.5                             |                                         | 82                                             | 310                      | 1.04                           | 322.40                         |                    | 195.46                              | 126.94                         | 80.92                            | 207.86                        |
| 53               | 1974 | Zhang Yumei                       | 1               | poor peasant               | 6.5                   | 3                      | 0                     | 3                       | 3                              |                           |                           | 3                              | 30                                     |                           |                                  |                        | 290                                  |                                      |                                         |                                 | 16                                                    |                                          | 30                         | 35                                            | 1050                                           | 274                       | 1.20                                         | 329                 |                                              | 1379                               | 459.6                             |                                         | 246                                            | 274                      | 1.1                            | 301.40                         |                    | 304.07                              | -2.67                          | 127.64                           | 124.97                        |
| 54               | 1974 | Wang Jishi                        | 1               | middle-class peasant       | 14.5                  | 3                      | 1                     | 2                       | 3                              |                           |                           | 3                              | 30                                     |                           |                                  |                        | 731                                  |                                      |                                         |                                 | 36                                                    |                                          | 30                         | 35                                            | 1050                                           | 695                       | 1.20                                         | 834                 |                                              | 1884                               | 628                               |                                         | 246                                            | 695                      | 1.1                            | 764.50                         | 21.61              | 693.98                              | 92.13                          | 1337.93                          | 1430.06                       |
| 55               | 1974 | Mu Zhaosheng                      | 2               | middle-class peasant       | 14                    | 2                      | 1                     | 1                       | 6                              | 1                         | 1                         | 4                              | 54                                     |                           |                                  |                        | 488                                  |                                      |                                         |                                 | 35                                                    |                                          | 54                         | 35                                            | 1890                                           | 453                       | 1.05                                         | 476                 | 18                                           | 2384                               | 397.275                           |                                         | 410                                            | 453                      | 1.04                           | 471.12                         |                    | 575.15                              | -104.03                        | 185.16                           | 81.13                         |
| 56               | 1974 | Li Cuilan                         | 2               | middle-class peasant       | 4                     | 1                      | 0                     | 1                       | 3                              |                           |                           | 3                              | 30                                     |                           |                                  |                        | 173                                  |                                      |                                         |                                 | 10                                                    |                                          | 30                         | 35                                            | 1050                                           | 163                       | 1.05                                         | 171                 |                                              | 1221                               | 407.05                            |                                         | 246                                            | 163                      | 1.04                           | 169.52                         |                    | 241.64                              | -72.12                         | 83.14                            | 11.02                         |
| 57               | 1974 | Ma Shanming                       | 2               | middle-class peasant       | 18                    | 3                      | 1                     | 2                       | 7                              |                           | 1                         | 6                              | 68                                     |                           |                                  |                        | 661                                  |                                      |                                         |                                 | 45                                                    |                                          | 68                         | 35                                            | 2380                                           | 616                       | 1.05                                         | 647                 |                                              | 3027                               | 432.4                             |                                         | 574                                            | 616                      | 1.04                           | 640.64                         |                    | 713.24                              | -72.60                         | -838.82                          | -911.42                       |
| 58               | 1974 | Liang Xiulan                      | 2               | middle-class peasant       | 12.5                  | 2                      | 1                     | 1                       | 4                              |                           |                           | 4                              | 40                                     |                           |                                  |                        | 457                                  |                                      |                                         |                                 | 31                                                    |                                          | 40                         | 35                                            | 1400                                           | 426                       | 1.05                                         | 447                 |                                              | 1847                               | 461.825                           |                                         | 328                                            | 426                      | 1.04                           | 443.04                         |                    | 574.64                              | -131.60                        | 97.60                            | -34.00                        |
| 59               | 1974 | Cui Yongchang                     | 1               | poor peasant               | 10.5                  | 2                      | 1                     | 1                       | 4                              |                           |                           | 4                              | 40                                     |                           |                                  |                        | 472                                  |                                      |                                         |                                 | 26                                                    |                                          | 40                         | 35                                            | 1400                                           | 446                       | 1.20                                         | 535                 |                                              | 1935                               | 483.8                             |                                         | 410                                            | 446                      | 1.1                            | 490.60                         |                    | 438.39                              | 52.21                          | -61.14                           | -8.93                         |

(cont.)

| Household number | Year | Name of the head of the household | Production team | Class status (1)         | Basic work points (2) | Total labor forces (3) | Male labor forces (4) | Female labor forces (5) | Total household population (6) | Age: 1 to 3 years old (7) | Age: 4 to 7 years old (8) | Age: 8 years old and above (9) | Work points of grain distribution (10) | Laboring work points (11) | Farmyard work points (12) | Total work points (13) | Work points of compulsory labor (14) | Work points of help cultivation (15) | Work points of private plots labor (16) | Total deducted work points (17) | Actual workdays of participation in distribution (18) | Workpoints for rations distribution (19) | Rations per workpoint (20) | Total rations received from distribution (21) | Workdays of participation in distribution (22) | Grains per workpoint (23) | Total grains distributed by work-points (24) | Grains subsidy (25) | Total Grains received from distribution (26) | Distributed grains per person (27) | Distributed grains per adult (28) | Grains received from private plots (29) | Workdays of participation in distribution (30) | Value per workpoint (31) | Total value of workpoints (32) | Money used for investment (33) | Sum of income (34) | Money distributed in this year (34) | Deposit/debt of this year (35) | Deposit/debt over the years (36) | Accumulated deposit/debt (37) |         |        |
|------------------|------|-----------------------------------|-----------------|--------------------------|-----------------------|------------------------|-----------------------|-------------------------|--------------------------------|---------------------------|---------------------------|--------------------------------|----------------------------------------|---------------------------|---------------------------|------------------------|--------------------------------------|--------------------------------------|-----------------------------------------|---------------------------------|-------------------------------------------------------|------------------------------------------|----------------------------|-----------------------------------------------|------------------------------------------------|---------------------------|----------------------------------------------|---------------------|----------------------------------------------|------------------------------------|-----------------------------------|-----------------------------------------|------------------------------------------------|--------------------------|--------------------------------|--------------------------------|--------------------|-------------------------------------|--------------------------------|----------------------------------|-------------------------------|---------|--------|
| 60               | 1974 | Zhang Hengshou                    | 1               | low-middle-class peasant | 18                    | 3                      | 1                     | 2                       | 7                              |                           | 1                         | 6                              | 68                                     |                           |                           |                        | 778                                  |                                      |                                         |                                 | 45                                                    |                                          | 68                         | 35                                            | 2380                                           | 733                       | 1.20                                         | 880                 |                                              | 3260                               | 465.6571429                       |                                         | 574                                            | 733                      | 1.1                            | 806.30                         |                    |                                     | 736.06                         | 70.24                            | 157.18                        | 227.42  |        |
| 61               | 1974 | Zhao Yingtong                     | 1               | poor peasant             | 12.5                  | 2                      | 1                     | 1                       | 3                              |                           |                           |                                | 30                                     |                           |                           |                        | 477                                  |                                      |                                         |                                 | 31                                                    |                                          | 30                         | 35                                            | 1050                                           | 446                       | 1.20                                         | 535                 |                                              | 1585                               | 528.4                             |                                         | 246                                            | 446                      | 1.1                            | 490.60                         |                    |                                     | 489.00                         | 1.60                             | 522.36                        | 523.96  |        |
| 62               | 1974 | Wu Xinggui                        | 1               | poor peasant             | 14                    | 2                      | 1                     | 1                       | 5                              | 1                         | 2                         | 2                              | 42                                     |                           |                           |                        | 515                                  |                                      |                                         |                                 | 35                                                    |                                          | 42                         | 35                                            | 1470                                           | 480                       | 1.20                                         | 576                 |                                              | 2046                               | 409.2                             |                                         | 328                                            | 480                      | 1.1                            | 528.00                         |                    |                                     | 602.10                         | -74.10                           | 211.52                        | 137.42  |        |
| 63               | 1974 | Wang Youfeng                      | 1               | poor peasant             | 4                     | 1                      | 0                     | 1                       | 3                              |                           |                           |                                | 30                                     |                           |                           |                        | 368                                  |                                      |                                         |                                 | 10                                                    |                                          | 30                         | 35                                            | 1050                                           | 358                       | 1.20                                         | 430                 |                                              | 1480                               | 493.2                             |                                         | 246                                            | 358                      | 1.1                            | 393.80                         |                    |                                     | 329.00                         | 64.80                            | -127.21                       | -62.41  |        |
| 64               | 1974 | Wang Qingsheng                    | 1               | poor peasant             | 10                    | 1                      | 1                     | 0                       | 2                              |                           |                           |                                | 20                                     |                           |                           |                        | 376                                  |                                      |                                         |                                 |                                                       |                                          | 20                         | 35                                            | 700                                            | 376                       | 1.20                                         | 451                 |                                              | 1151                               | 575.6                             |                                         | 164                                            | 376                      | 1.1                            | 413.60                         |                    |                                     | 349.13                         | 64.47                            | 457.16                        | 521.63  |        |
| 65               | 1974 | Li Yulin                          | 1               | middle-class peasant     |                       | 0                      |                       |                         | 2                              |                           |                           | 2                              | 20                                     |                           |                           |                        | 91                                   |                                      |                                         |                                 |                                                       |                                          | 20                         | 35                                            | 700                                            | 91                        | 1.20                                         | 109                 |                                              | 809                                | 404.6                             |                                         | 246                                            | 91                       | 1.1                            | 100.10                         |                    |                                     | 320.78                         | -220.68                          | 524.30                        | 303.62  |        |
| 66               | 1974 | Zuo Chunlan                       | 1               | middle-class peasant     | 4                     | 1                      | 0                     | 1                       | 5                              |                           | 1                         | 4                              | 48                                     |                           |                           |                        | 167                                  |                                      |                                         |                                 | 10                                                    |                                          | 48                         | 35                                            | 1680                                           | 157                       | 1.20                                         | 188                 |                                              | 1868                               | 373.68                            |                                         | 492                                            | 157                      | 1.1                            | 172.70                         | 140                |                                     | 381.29                         | -68.59                           | 16.13                         | -52.46  |        |
| 67               | 1974 | Gao Chongji                       | 1               | poor peasant             | 14.5                  | 3                      | 1                     | 2                       | 7                              |                           |                           |                                | 70                                     |                           |                           |                        | 847                                  |                                      |                                         |                                 | 10                                                    |                                          | 70                         | 35                                            | 2450                                           | 837                       | 1.20                                         | 1004                |                                              | 3454                               | 446                               |                                         | 656                                            | 837                      | 1.1                            | 920.70                         |                    |                                     | 1292.05                        | -371.35                          | 1326.74                       | 955.39  |        |
| 68               | 1974 | Gao Chongwen                      | 1               | poor peasant             | 24.5                  | 4                      | 2                     | 2                       | 8                              |                           | 1                         | 7                              | 78                                     |                           |                           |                        | 1017                                 |                                      |                                         |                                 | 61                                                    |                                          | 78                         | 35                                            | 2730                                           | 956                       | 1.20                                         | 1147                |                                              | 3877                               | 484.65                            |                                         | 656                                            | 956                      | 1.1                            | 1051.60                        |                    |                                     | 922.65                         | 128.95                           | -167.07                       | -38.12  |        |
| 69               | 1974 | Gao Peiren                        | 1               | poor peasant             | 26                    | 4                      | 2                     | 2                       | 8                              |                           | 1                         | 7                              | 78                                     |                           |                           |                        | 1146                                 |                                      |                                         |                                 | 65                                                    |                                          | 78                         | 35                                            | 2730                                           | 1081                      | 1.20                                         | 1297                |                                              | 4027                               | 503.4                             |                                         | 656                                            | 1081                     | 1.1                            | 1189.10                        |                    |                                     | 975.92                         | 213.18                           | 242.07                        | 455.25  |        |
| 70               | 1974 | Wang Jingyi                       | 1               | low-middle-class peasant | 6.5                   | 2                      | 0                     | 2                       | 2                              |                           |                           | 2                              | 20                                     |                           |                           |                        | 231                                  |                                      |                                         |                                 | 16                                                    |                                          | 20                         | 35                                            | 700                                            | 215                       | 1.20                                         | 258                 |                                              | 958                                | 479                               |                                         | 164                                            | 215                      | 1.1                            | 236.50                         |                    |                                     | 338.37                         | -101.87                          | 340.74                        | 238.87  |        |
| 71               | 1974 | Wang Shutang                      | 1               | low-middle-class peasant | 14                    | 2                      | 1                     | 1                       | 4                              |                           |                           |                                | 40                                     |                           |                           |                        | 582                                  |                                      |                                         |                                 | 35                                                    |                                          | 40                         | 35                                            | 1400                                           | 547                       | 1.20                                         | 656                 | 18                                           | 2074                               | 518.6                             |                                         |                                                | 328                      | 547                            | 1.1                            | 601.70             |                                     |                                | 620.24                           | -18.54                        | 577.34  | 558.80 |
| 72               | 1974 | Meng Peizhong                     | 1               | middle-class peasant     |                       | 0                      |                       |                         | 1                              |                           |                           | 1                              | 10                                     |                           |                           |                        | 326                                  |                                      |                                         |                                 |                                                       |                                          | 10                         | 35                                            | 350                                            | 326                       | 1.20                                         | 391                 |                                              | 741                                | 741.2                             |                                         | 82                                             | 326                      | 1.1                            | 358.60                         |                    |                                     | 299.25                         | 59.35                            | 546.24                        | 605.59  |        |
| 73               | 1974 | Meng Peixing                      | 1               | middle-class peasant     | 10.5                  | 2                      | 1                     | 1                       | 4                              |                           |                           | 4                              | 40                                     |                           |                           |                        | 453                                  |                                      |                                         |                                 | 26                                                    |                                          | 40                         | 35                                            | 1400                                           | 427                       | 1.20                                         | 512                 |                                              | 1912                               | 478.1                             |                                         | 492                                            | 427                      | 1.1                            | 469.70                         |                    |                                     | 535.47                         | -65.77                           | 322.60                        | 256.83  |        |
| 74               | 1974 | Meng Mingbiao                     | 1               | middle-class peasant     | 14                    | 2                      | 1                     | 1                       | 7                              | 1                         | 1                         | 5                              | 64                                     |                           |                           |                        | 393                                  |                                      |                                         |                                 | 35                                                    |                                          | 64                         | 35                                            | 2240                                           | 358                       | 1.20                                         | 430                 |                                              | 2670                               | 391                               |                                         | 492                                            | 358                      | 1.1                            | 393.80                         | 21.14              |                                     | 589.18                         | -174.24                          | -287.02                       | -461.26 |        |
| 75               | 1974 | Xue Yuhua                         | 1               | poor peasant             | 12.5                  | 2                      | 1                     | 1                       | 3                              |                           |                           |                                | 30                                     |                           |                           |                        | 223                                  |                                      |                                         |                                 | 31                                                    |                                          | 30                         | 35                                            | 1050                                           | 192                       | 1.20                                         | 230                 |                                              | 1280                               | 426.8                             |                                         | 246                                            | 192                      | 1.1                            | 211.20                         |                    |                                     | 312.18                         | -100.98                          | -453.68                       | -554.66 |        |
| 76               | 1974 | Wang Chuanai                      | 1               | middle-class peasant     | 4                     | 1                      | 0                     | 1                       | 6                              | 1                         | 2                         | 3                              | 52                                     |                           |                           |                        | 56                                   |                                      |                                         |                                 | 10                                                    |                                          | 52                         | 35                                            | 1745                                           | 46                        | 1.20                                         | 55                  |                                              | 1800                               | 300.0333333                       |                                         | 410                                            | 46                       | 1.1                            | 50.60                          | 320                |                                     | 347.52                         | 23.08                            | -190.28                       | -167.20 |        |
| 77               | 1974 | Wang Zhenguo                      |                 | low-middle-class peasant | 10.5                  | 2                      | 1                     | 1                       | 3                              |                           |                           |                                | 30                                     |                           |                           |                        | 647                                  |                                      |                                         |                                 | 26                                                    |                                          | 30                         | 35                                            | 1050                                           | 621                       | 1.20                                         | 652                 |                                              | 1702                               | 567.3333333                       |                                         | 246                                            | 621                      | 1.04                           | 645.84                         |                    |                                     | 741.99                         | -96.15                           | 459.49                        | 363.34  |        |
| 78               | 1974 | Mu Shouquan                       | 1               | poor peasant             | 2.5                   | 1                      | 0                     | 1                       | 2                              |                           |                           |                                | 20                                     |                           |                           |                        | 386                                  |                                      |                                         |                                 | 6                                                     |                                          | 20                         | 35                                            | 700                                            | 380                       | 1.20                                         | 456                 |                                              | 1156                               | 578                               |                                         | 164                                            | 380                      | 1.1                            | 418.00                         |                    |                                     | 349.94                         | 68.06                            | 541.86                        | 609.92  |        |
| 79               | 1974 | Mu Zhaozheng                      | 1               | poor peasant             | 14                    | 2                      | 1                     | 1                       | 6                              | 1                         | 1                         | 4                              | 54                                     |                           |                           |                        | 685                                  |                                      |                                         |                                 | 35                                                    |                                          | 54                         | 35                                            | 1890                                           | 650                       | 1.20                                         | 780                 | 18                                           | 2688                               | 448                               |                                         | 410                                            | 650                      | 1.1                            | 715.00                         |                    |                                     | 745.82                         | -30.82                           | 651.28                        | 620.46  |        |
| 80               | 1974 | Ma Likui                          | 1               | poor peasant             | 26                    | 4                      | 2                     | 2                       | 6                              | 1                         |                           | 5                              | 56                                     |                           |                           |                        | 1073                                 |                                      |                                         |                                 | 65                                                    |                                          | 56                         | 35                                            | 1960                                           | 1008                      | 1.20                                         | 1210                |                                              | 3170                               | 528.2666667                       |                                         | 328                                            | 1008                     | 1.1                            | 1108.80                        | 31.94              |                                     | 864.10                         | 276.64                           | 660.15                        | 936.79  |        |

(cont.)

| Household number | Year | Name of the head of the household | Production team | Class status (1)         | Basic work points (2) | Total labor forces (3) | Male labor forces (4) | Female labor forces (5) | Total household population (6) | Age: 1 to 3 years old (7) | Age: 4 to 7 years old (8) | Age: 8 years old and above (9) | Work points of grain distribution (10) | Laboring work points (11) | Farmyard manure work points (12) | Total work points (13) | Work points of compulsory labor (14) | Work points of help cultivation (15) | Work points of private plots labor (16) | Total deducted work points (17) | Actual workdays of participation in distribution (18) | Workpoints for rations distribution (19) | Rations per workpoint (20) | Total rations received from distribution (21) | Workdays of participation in distribution (22) | Grains per workpoint (23) | Total grains distributed by work-points (24) | Grains subsidy (25) | Total Grains received from distribution (26) | Distributed grains per person (27) | Distributed grains per adult (28) | Grains received from private plots (29) | Workdays of participation in distribution (30) | Value per workpoint (31) | Total value of workpoints (32) | Money used for investment (33) | Sum of income (34) | Money distributed in this year (34) | Deposit/debt of this year (35) | Deposit/debt over the years (36) | Accumulated deposit/debt (37) |          |       |
|------------------|------|-----------------------------------|-----------------|--------------------------|-----------------------|------------------------|-----------------------|-------------------------|--------------------------------|---------------------------|---------------------------|--------------------------------|----------------------------------------|---------------------------|----------------------------------|------------------------|--------------------------------------|--------------------------------------|-----------------------------------------|---------------------------------|-------------------------------------------------------|------------------------------------------|----------------------------|-----------------------------------------------|------------------------------------------------|---------------------------|----------------------------------------------|---------------------|----------------------------------------------|------------------------------------|-----------------------------------|-----------------------------------------|------------------------------------------------|--------------------------|--------------------------------|--------------------------------|--------------------|-------------------------------------|--------------------------------|----------------------------------|-------------------------------|----------|-------|
| 81               | 1974 | Ma Xiulan                         | 1               | middle-class peasant     | 4                     | 1                      | 0                     | 1                       | 6                              | 1                         | 1                         | 4                              | 54                                     |                           |                                  |                        | 176                                  |                                      |                                         | 10                              |                                                       | 54                                       | 35                         | 1890                                          | 166                                            | 1.20                      | 199                                          |                     | 2089                                         |                                    | 348.2                             |                                         | 492                                            | 166                      | 1.1                            | 182.60                         | 225                |                                     | 398.24                         | 9.36                             | -42.30                        | -32.94   |       |
| 82               | 1974 | Wang Dianjie                      | 1               | middle-class peasant     | 28                    | 4                      | 2                     | 2                       | 8                              |                           | 1                         | 7                              | 78                                     |                           |                                  |                        | 983                                  |                                      |                                         | 70                              |                                                       | 78                                       | 35                         | 2730                                          | 913                                            | 1.20                      | 1096                                         |                     | 3826                                         |                                    | 478.2                             |                                         | 656                                            | 913                      | 1.1                            | 1004.30                        |                    |                                     | 947.52                         | 56.78                            | 412.01                        | 468.79   |       |
| 83               | 1974 | Wang Litang                       | 1               | low-middle-class peasant | 24                    | 3                      | 2                     | 1                       | 9                              | 1                         | 1                         | 7                              | 84                                     |                           |                                  |                        | 1181                                 |                                      |                                         | 60                              |                                                       | 84                                       | 35                         | 2940                                          | 1121                                           | 1.05                      | 1177                                         |                     | 4117                                         |                                    | 457.45                            |                                         | 738                                            | 1121                     | 1.04                           | 1165.84                        |                    |                                     | 1284.13                        | -118.29                          | 502.48                        | 384.19   |       |
| 84               | 1974 | Wei Zhaoliang                     | 1               | low-middle-class peasant | 22                    | 3                      | 2                     | 1                       | 4                              |                           |                           | 4                              | 40                                     |                           |                                  |                        | 723                                  |                                      |                                         | 55                              |                                                       | 40                                       | 35                         | 1400                                          | 668                                            | 1.20                      | 802                                          |                     | 2202                                         |                                    | 550.4                             |                                         | 328                                            | 668                      | 1.1                            | 734.80                         |                    |                                     | 734.48                         | 0.32                             | 371.93                        | 372.25   |       |
| 85               | 1974 | Yang Zhongwen                     | 2               | middle-class peasant     |                       | 0                      |                       |                         | 2                              |                           |                           | 2                              | 20                                     |                           |                                  |                        | 4                                    |                                      |                                         |                                 |                                                       | 20                                       | 35                         | 700                                           | 4                                              | 1.05                      | 4                                            |                     | 704                                          |                                    | 352.1                             |                                         | 164                                            | 4                        | 1.04                           | 4.16                           |                    |                                     | 157.19                         | -153.03                          | -768.66                       | -921.69  |       |
| 86               | 1974 | Zhu Guangchang                    | 2               | middle-class peasant     | 24                    | 3                      | 2                     | 1                       | 4                              |                           |                           | 4                              | 40                                     |                           |                                  |                        | 1143                                 |                                      |                                         | 60                              |                                                       | 40                                       | 35                         | 1400                                          | 1083                                           | 1.05                      | 1137                                         | 18                  | 2555                                         |                                    | 638.7875                          |                                         | 328                                            | 1083                     | 1.04                           | 1126.32                        |                    |                                     | 870.54                         | 255.78                           | 824.51                        | 1080.29  |       |
| 87               | 1974 | Yang Yugui                        | 1               | middle-class peasant     | 18                    | 2                      | 2                     | 0                       | 3                              |                           |                           | 3                              | 30                                     |                           |                                  |                        | 353                                  |                                      |                                         | 45                              |                                                       | 30                                       | 35                         | 1050                                          | 308                                            | 1.20                      | 370                                          |                     | 1420                                         |                                    | 473.2                             |                                         | 246                                            | 308                      | 1.1                            | 338.80                         |                    |                                     | 356.09                         | -17.29                           | 76.39                         | 59.10    |       |
| 88               | 1974 | Yang Yingzhou                     | 2               | middle-class peasant     | 14                    | 2                      | 1                     | 1                       | 3                              |                           |                           | 3                              | 30                                     |                           |                                  |                        | 502                                  |                                      |                                         | 35                              |                                                       | 30                                       | 35                         | 1050                                          | 467                                            | 1.05                      | 490                                          | 18                  | 1558                                         |                                    | 519.45                            |                                         | 246                                            | 467                      | 1.04                           | 485.68                         |                    |                                     | 597.39                         | -111.71                          | 137.61                        | 25.90    |       |
| 89               | 1974 | Li Kailiang                       | 1               | poor peasant             | 10                    | 1                      | 1                     | 0                       | 2                              |                           |                           | 2                              | 20                                     |                           |                                  |                        | 404                                  |                                      |                                         | 25                              |                                                       | 20                                       | 35                         | 700                                           | 379                                            | 1.20                      | 455                                          |                     | 1155                                         |                                    | 577.4                             |                                         | 246                                            | 379                      | 1.1                            | 416.90                         |                    |                                     | 385.06                         | 31.84                            | 311.55                        | 343.39   |       |
| 90               | 1974 | Li Kaigong                        | 1               | poor peasant             | 6.5                   | 2                      | 0                     | 2                       | 3                              |                           |                           | 3                              | 30                                     |                           |                                  |                        | 477                                  |                                      |                                         | 16                              |                                                       | 30                                       | 35                         | 1050                                          | 461                                            | 1.20                      | 553                                          |                     | 1603                                         |                                    | 534.4                             |                                         | 246                                            | 461                      | 1.1                            | 507.10                         |                    |                                     | 549.64                         | -42.54                           | 691.26                        | 648.72   |       |
| 91               | 1974 | Meng Jingcan                      | 1               | poor peasant             |                       | 0                      |                       |                         | 2                              |                           |                           | 2                              | 20                                     |                           |                                  |                        |                                      |                                      |                                         |                                 |                                                       | 20                                       | 35                         | 700                                           | 0                                              | 1.20                      | 0                                            |                     | 700                                          |                                    | 350                               |                                         | 164                                            | 0                        | 1.1                            | 0.00                           | 80                 |                                     |                                | 124.56                           | -44.56                        | 97.73    | 53.17 |
| 92               | 1974 | Fu Lidong                         | 1               | middle-class peasant     |                       | 0                      |                       |                         | 1                              |                           |                           | 1                              | 10                                     |                           |                                  |                        | 179                                  |                                      |                                         | 10                              |                                                       | 10                                       | 35                         | 350                                           | 179                                            | 1.20                      | 215                                          |                     | 565                                          |                                    | 564.8                             |                                         | 82                                             | 179                      | 1.1                            | 196.90                         |                    |                                     | 173.30                         | 23.60                            | 197.28                        | 220.88   |       |
| 93               | 1974 | Meng Peicheng                     | 1               | middle-class peasant     | 14                    | 2                      | 1                     | 1                       | 9                              | 2                         | 1                         | 6                              | 80                                     |                           |                                  |                        | 537                                  |                                      |                                         | 35                              |                                                       | 80                                       | 35                         | 2800                                          | 502                                            | 1.20                      | 602                                          | 18                  | 3420                                         |                                    | 380.0444444                       |                                         | 656                                            | 502                      | 1.1                            | 552.20                         |                    |                                     | 868.28                         | -316.08                          | -814.73                       | -1130.81 |       |
| 94               | 1974 | Mu Shouwen                        | 1               | middle-class peasant     | 14                    | 2                      | 1                     | 1                       | 7                              | 1                         | 1                         | 5                              | 64                                     |                           |                                  |                        | 569                                  |                                      |                                         | 35                              |                                                       | 64                                       | 35                         | 2155                                          | 534                                            | 1.20                      | 641                                          |                     | 2796                                         |                                    | 399.4                             |                                         | 574                                            | 534                      | 1.1                            | 587.40                         |                    |                                     | 616.41                         | -29.01                           | 104.08                        | 75.07    |       |
| 95               | 1974 | Mu Zhaorui                        | 1               | middle-class peasant     | 14                    | 2                      | 1                     | 1                       | 3                              | 1                         |                           | 2                              | 26                                     |                           |                                  |                        | 481                                  |                                      |                                         | 35                              |                                                       | 26                                       | 35                         | 910                                           | 446                                            | 1.20                      | 535                                          | 18                  | 1463                                         |                                    | 487.7333333                       |                                         | 164                                            | 446                      | 1.1                            | 490.60                         |                    |                                     | 420.79                         | 69.81                            | 478.46                        | 548.27   |       |
| 96               | 1974 | Zhang Lirong                      | 2               | middle-class peasant     | 14                    | 2                      | 1                     | 1                       | 5                              | 1                         | 1                         | 3                              | 44                                     |                           |                                  |                        | 632                                  |                                      |                                         | 35                              |                                                       | 44                                       | 35                         | 1540                                          | 597                                            | 1.05                      | 627                                          |                     | 2167                                         |                                    | 433.37                            |                                         | 492                                            | 597                      | 1.04                           | 620.88                         |                    |                                     | 641.67                         | -20.79                           | 622.78                        | 601.99   |       |
| 97               | 1974 | Cui Yongfu                        | 1               | poor peasant             | 12.5                  | 2                      | 1                     | 1                       | 4                              |                           |                           | 4                              | 40                                     |                           |                                  |                        | 542                                  |                                      |                                         | 31                              |                                                       | 40                                       | 35                         | 1400                                          | 511                                            | 1.20                      | 613                                          |                     | 2013                                         |                                    | 503.3                             |                                         | 328                                            | 511                      | 1.1                            | 562.10                         |                    |                                     | 798.29                         | -236.19                          | 628.24                        | 392.05   |       |
| 98               | 1974 | Meng Lanying                      | 1               | poor peasant             |                       | 0                      |                       |                         | 1                              |                           |                           | 1                              | 10                                     |                           |                                  |                        |                                      |                                      |                                         |                                 |                                                       | 10                                       | 35                         | 120                                           | 0                                              | 1.20                      | 0                                            |                     | 120                                          |                                    | 120                               |                                         | 82                                             | 0                        | 1.1                            | 0.00                           |                    |                                     | 47.94                          | -47.94                           | -479.37                       | -527.31  |       |
| 99               | 1974 | Cui Yiren                         | 1               | poor peasant             | 14                    | 2                      | 1                     | 1                       | 6                              | 2                         | 1                         | 3                              | 50                                     |                           |                                  |                        | 456                                  |                                      |                                         | 35                              |                                                       | 50                                       | 35                         | 1699                                          | 421                                            | 1.20                      | 505                                          |                     | 2204                                         |                                    | 367.3666667                       |                                         | 410                                            | 421                      | 1.1                            | 463.10                         |                    |                                     | 603.01                         | -139.91                          | 50.79                         | -89.12   |       |

(cont.)

| Household number | Year | Name of the head of the household | Production team | Class status (1)         | Basic work points (2) | Total labor forces (3) | Male labor forces (4) | Female labor forces (5) | Total household population (6) | Age: 1 to 3 years old (7) | Age: 4 to 7 years old (8) | Age: 8 years old and above (9) | Work points of grain distribution (10) | Laboring work points (11) | Farmyard manure work points (12) | Total work points (13) | Work points of compulsory labor (14) | Work points of help cultivation (15) | Work points of private plots labor (16) | Total deducted work points (17) | Actual workdays of participation in distribution (18) | Workpoints for rations distribution (19) | Rations per workpoint (20) | Total rations received from distribution (21) | Workdays of participation in distribution (22) | Grains per workpoint (23) | Total grains distributed by work-points (24) | Grains subsidy (25) | Total Grains received from distribution (26) | Distributed grains per person (27) | Distributed grains per adult (28) | Grains received from private plots (29) | Workdays of participation in distribution (30) | Value per workpoint (31) | Total value of workpoints (32) | Money used for investment (33) | Sum of income (34) | Money distributed in this year (34) | Deposit/debt of this year (35) | Deposit/debt over the years (36) | Accumulated deposit/debt (37) |
|------------------|------|-----------------------------------|-----------------|--------------------------|-----------------------|------------------------|-----------------------|-------------------------|--------------------------------|---------------------------|---------------------------|--------------------------------|----------------------------------------|---------------------------|----------------------------------|------------------------|--------------------------------------|--------------------------------------|-----------------------------------------|---------------------------------|-------------------------------------------------------|------------------------------------------|----------------------------|-----------------------------------------------|------------------------------------------------|---------------------------|----------------------------------------------|---------------------|----------------------------------------------|------------------------------------|-----------------------------------|-----------------------------------------|------------------------------------------------|--------------------------|--------------------------------|--------------------------------|--------------------|-------------------------------------|--------------------------------|----------------------------------|-------------------------------|
| 100              | 1974 | Wang Qingde                       | 1               | low-middle-class peasant |                       | 0                      |                       |                         | 1                              |                           |                           | 1                              | 10                                     |                           |                                  |                        | 249                                  |                                      |                                         |                                 |                                                       | 10                                       | 35                         | 350                                           | 249                                            | 1.20                      | 299                                          |                     | 649                                          |                                    | 648.8                             |                                         | 82                                             | 249                      | 1.1                            | 273.90                         |                    | 248.26                              | 25.64                          | 525.68                           | 551.32                        |
| 101              | 1974 | Jin Lianyu                        | 1               | poor peasant             |                       | 0                      |                       |                         | 1                              |                           |                           | 1                              | 10                                     |                           |                                  |                        |                                      |                                      |                                         |                                 | 20                                                    | 10                                       | 35                         | 350                                           | 0                                              | 1.20                      | 0                                            |                     | 350                                          |                                    | 350                               |                                         | 82                                             | 0                        | 1.1                            | 0.00                           | 1133.95            | 109.19                              | 1024.76                        | -1133.95                         | -109.19                       |
| 102              | 1974 | Wang Qiyi                         | 2               | poor peasant             | 8                     | 1                      | 1                     | 0                       | 1                              |                           |                           | 1                              | 10                                     |                           |                                  |                        | 369                                  |                                      |                                         |                                 |                                                       | 10                                       | 35                         | 350                                           | 349                                            | 1.05                      | 366                                          |                     | 716                                          |                                    | 716.45                            |                                         | 82                                             | 349                      | 1.04                           | 362.96                         |                    | 259.15                              | 103.81                         | 310.18                           | 413.99                        |
| 103              | 1974 | Yang Chengye                      | 1               | poor peasant             |                       | 0                      |                       |                         | 1                              |                           |                           | 1                              | 10                                     |                           |                                  |                        | 113                                  |                                      |                                         |                                 |                                                       | 10                                       | 35                         | 350                                           | 113                                            | 1.20                      | 136                                          |                     | 486                                          |                                    | 485.6                             |                                         | 82                                             | 113                      | 1.1                            | 124.30                         |                    | 113.93                              | 10.37                          | 124.24                           | 134.61                        |
| 104              | 1974 | Meng Mingjian                     | 1               | poor peasant             | 18                    | 2                      | 1                     | 1                       | 5                              | 1                         |                           | 4                              | 46                                     |                           |                                  |                        | 678                                  |                                      |                                         |                                 | 45                                                    | 46                                       | 35                         | 1610                                          | 633                                            | 1.20                      | 760                                          |                     | 2370                                         |                                    | 473.92                            |                                         | 410                                            | 633                      | 1.1                            | 696.30                         |                    | 761.51                              | -65.21                         | 71.95                            | 6.74                          |
| 105              | 1974 | Guo Yuexiang                      | 1               | poor peasant             | 4                     | 1                      | 0                     | 1                       | 6                              |                           | 1                         | 5                              | 58                                     |                           |                                  |                        | 339                                  |                                      |                                         |                                 | 10                                                    | 58                                       | 35                         | 2030                                          | 329                                            | 1.20                      | 395                                          |                     | 2425                                         |                                    | 404.1333333                       |                                         | 492                                            | 329                      | 1.1                            | 361.90                         | 40                 | 455.48                              | -53.58                         | 177.62                           | 124.04                        |
| 106              | 1974 | Wu Congchao                       | 2               | poor peasant             | 18                    | 3                      | 1                     | 2                       | 7                              |                           | 1                         | 6                              | 68                                     |                           |                                  |                        | 703                                  |                                      |                                         |                                 | 45                                                    | 68                                       | 35                         | 2380                                          | 858                                            | 1.05                      | 901                                          |                     | 3281                                         |                                    | 468.7                             |                                         | 574                                            | 858                      | 1.04                           | 892.32                         |                    | 842.59                              | 49.73                          | -548.48                          | -498.75                       |
| 107              | 1974 | Xie Yuzhen                        | 2               | poor peasant             | 14                    | 2                      | 1                     | 1                       | 2                              |                           |                           | 2                              | 20                                     |                           |                                  |                        | 105                                  |                                      |                                         |                                 | 35                                                    | 20                                       | 35                         | 700                                           | 70                                             | 1.05                      | 74                                           |                     | 733                                          |                                    | 773                               |                                         | 82                                             | 70                       | 1.04                           | 72.80                          |                    | 134.21                              | -61.41                         |                                  | -61.41                        |
| 108              | 1974 | Wu Songlin                        | 2               | poor peasant             |                       | 0                      |                       |                         | 1                              |                           |                           | 1                              | 10                                     |                           |                                  |                        | 99                                   |                                      |                                         |                                 |                                                       | 10                                       | 35                         | 350                                           | 99                                             | 1.05                      | 104                                          |                     | 454                                          |                                    | 453.95                            |                                         | 164                                            | 99                       | 1.04                           | 102.96                         |                    | 113.65                              | -10.69                         | -1042.34                         | -1053.03                      |
| 109              | 1974 | Yang Chunmei                      | 2               | poor peasant             | 14                    | 2                      | 1                     | 1                       | 5                              |                           |                           | 5                              | 50                                     |                           |                                  |                        | 569                                  |                                      |                                         |                                 | 35                                                    | 50                                       | 35                         | 1750                                          | 534                                            | 1.05                      | 561                                          |                     | 2311                                         |                                    | 462.14                            |                                         | 410                                            | 534                      | 1.04                           | 555.36                         |                    | 536.14                              | 19.22                          | -419.42                          | -400.20                       |
| 110              | 1974 | Wu Yulan                          | 2               | poor peasant             | 4                     | 1                      | 0                     | 1                       | 6                              | 1                         | 2                         | 3                              | 52                                     |                           |                                  |                        | 276                                  |                                      |                                         |                                 | 10                                                    | 52                                       | 35                         | 1786                                          | 266                                            | 1.05                      | 279                                          |                     | 2065                                         |                                    | 344.2166667                       |                                         | 410                                            | 266                      | 1.04                           | 276.64                         |                    | 410.87                              | -134.23                        | 143.18                           | 8.95                          |
| 111              | 1974 | Hua Suzhen                        | 1               | poor peasant             | 2.5                   | 1                      | 0                     | 1                       | 1                              |                           |                           | 1                              | 10                                     |                           |                                  |                        | 64                                   |                                      |                                         |                                 | 6                                                     | 10                                       | 35                         | 350                                           | 58                                             | 1.20                      | 70                                           |                     | 420                                          |                                    | 419.6                             |                                         | 164                                            | 58                       | 1.1                            | 63.80                          |                    | 154.53                              | -90.73                         | 212.28                           | 121.55                        |
| 112              | 1974 | Song Liangxiang                   | 1               | poor peasant             | 4                     | 1                      | 0                     | 1                       | 2                              | 1                         |                           | 1                              | 16                                     |                           |                                  |                        | 145                                  |                                      |                                         |                                 | 10                                                    | 16                                       | 35                         | 560                                           | 135                                            | 1.20                      | 141                                          |                     | 701                                          |                                    | 350.5                             |                                         | 82                                             | 135                      | 1.04                           | 140.40                         |                    | 175.24                              | -34.84                         | 153.61                           | 118.77                        |
| 113              | 1974 | Zhang Dongde                      | 1               | poor peasant             | 4                     | 1                      | 0                     | 1                       | 3                              |                           |                           | 3                              | 30                                     |                           |                                  |                        | 450                                  |                                      |                                         |                                 | 10                                                    | 30                                       | 35                         | 1050                                          | 440                                            | 1.20                      | 528                                          |                     | 1578                                         |                                    | 526                               |                                         | 246                                            | 440                      | 1.1                            | 484.00                         |                    | 399.78                              | 84.22                          | 319.49                           | 403.71                        |
| 114              | 1974 | Zhang Zhenyuan                    | 2               | poor peasant             | 14                    | 2                      | 1                     | 1                       | 5                              | 1                         | 2                         | 2                              | 42                                     |                           |                                  |                        | 458                                  |                                      |                                         |                                 | 35                                                    | 42                                       | 35                         | 1470                                          | 423                                            | 1.05                      | 444                                          | 18                  | 1932                                         |                                    | 386.43                            |                                         | 328                                            | 423                      | 1.04                           | 439.92                         |                    | 524.51                              | -84.59                         | 284.31                           | 199.72                        |
| 115              | 1974 | Meng Qingyun                      | 2               | poor peasant             | 8                     | 1                      | 1                     | 0                       | 1                              |                           |                           | 1                              | 10                                     |                           |                                  |                        | 258                                  |                                      |                                         |                                 | 20                                                    | 10                                       | 35                         | 350                                           | 238                                            | 1.05                      | 250                                          |                     | 600                                          |                                    | 599.9                             |                                         | 82                                             | 238                      | 1.04                           | 247.52                         |                    | 220.66                              | 26.86                          | 621.42                           | 648.28                        |
| 116              | 1974 | Zhao Hongsheng                    | 1               | low-middle-class peasant | 36                    | 5                      | 3                     | 2                       | 8                              | 1                         |                           | 7                              | 76                                     |                           |                                  |                        | 1049                                 |                                      |                                         |                                 | 90                                                    | 76                                       | 35                         | 2660                                          | 959                                            | 1.20                      | 1151                                         |                     | 3811                                         |                                    | 476.35                            |                                         | 574                                            | 959                      | 1.1                            | 1054.90                        |                    | 1165.89                             | -110.99                        | 461.17                           | 350.18                        |
| 117              | 1974 | Mneg Mingyou                      | 2               | poor peasant             | 10                    | 1                      | 1                     | 0                       | 1                              |                           |                           | 1                              | 10                                     |                           |                                  |                        | 304                                  |                                      |                                         |                                 | 25                                                    | 10                                       | 35                         | 350                                           | 279                                            | 1.05                      | 293                                          |                     | 643                                          |                                    | 642.95                            |                                         | 82                                             | 279                      | 1.04                           | 290.16                         |                    | 243.66                              | 46.50                          | 498.05                           | 544.55                        |
| 118              | 1974 | Xu Peishi                         | 1               | poor peasant             | 20.5                  | 4                      | 2                     | 2                       | 5                              |                           |                           | 5                              | 50                                     |                           |                                  |                        | 649                                  |                                      |                                         |                                 | 51                                                    | 50                                       | 35                         | 1750                                          | 598                                            | 1.20                      | 718                                          |                     | 2468                                         |                                    | 493.52                            |                                         | 492                                            | 598                      | 1.1                            | 657.80                         |                    | 614.47                              | 43.33                          | -767.25                          | -723.92                       |
| 119              | 1974 | Wang Qingchang                    | 1               | poor peasant             | 14                    | 2                      | 1                     | 1                       | 4                              |                           |                           | 4                              | 40                                     |                           |                                  |                        | 789                                  |                                      |                                         |                                 | 35                                                    | 40                                       | 35                         | 1400                                          | 754                                            | 1.20                      | 791                                          |                     | 2191                                         |                                    | 547.75                            |                                         | 328                                            | 754                      | 1.04                           | 784.16                         | 90                 | 969.43                              | -95.27                         | 763.66                           | 668.39                        |
| 120              | 1974 | Wang Qinghai                      | 2               | poor peasant             | 14                    | 2                      | 1                     | 1                       | 10                             |                           | 2                         | 8                              | 96                                     |                           |                                  |                        | 877                                  |                                      |                                         |                                 | 35                                                    | 96                                       | 35                         | 3360                                          | 842                                            | 1.05                      | 884                                          | 18                  | 4262                                         |                                    | 426.21                            |                                         | 820                                            | 842                      | 1.04                           | 875.68                         |                    | 948.26                              | -72.58                         | -589.84                          | -662.42                       |
| 121              | 1974 | Cao Desheng                       | 2               | poor peasant             | 8                     | 1                      | 1                     | 0                       | 1                              |                           |                           | 1                              | 10                                     |                           |                                  |                        | 252                                  |                                      |                                         |                                 | 20                                                    | 10                                       | 35                         | 350                                           | 232                                            | 1.05                      | 244                                          |                     | 594                                          |                                    | 593.6                             |                                         | 82                                             | 232                      | 1.04                           | 241.28                         |                    | 235.27                              | 6.01                           | 125.27                           | 131.28                        |
| 122              | 1974 | Ma Yuying                         | 2               | poor peasant             |                       | 0                      |                       |                         | 2                              |                           |                           | 2                              | 20                                     |                           |                                  |                        | 5                                    |                                      |                                         |                                 |                                                       | 20                                       | 35                         | 700                                           | 5                                              | 1.05                      | 5                                            |                     | 705                                          |                                    | 352.625                           |                                         | 164                                            | 5                        | 1.04                           | 5.20                           | 80                 | 134.57                              | -49.37                         | -247.28                          | -296.65                       |
| 123              | 1974 | Liu Peizhen                       | 2               | poor peasant             |                       | 0                      |                       |                         | 0                              |                           |                           | 0                              | 0                                      |                           |                                  |                        |                                      |                                      |                                         |                                 | 0                                                     | 35                                       | 0                          | 0                                             | 0                                              | 1.05                      | 0                                            |                     | 0                                            |                                    | #DIV/o!                           |                                         | 0                                              | 0                        | 1.04                           | 0.00                           |                    | 0.00                                | -541.64                        | -541.64                          |                               |
| 124              | 1974 | Liu Dahai                         | 2               | middle-class peasant     | 16.5                  | 3                      | 1                     | 2                       | 5                              | 1                         | 1                         | 3                              | 44                                     |                           |                                  |                        | 664                                  |                                      |                                         |                                 | 41                                                    | 44                                       | 35                         | 1540                                          | 623                                            | 1.05                      | 654                                          |                     | 2194                                         |                                    | 438.83                            |                                         | 328                                            | 623                      | 1.04                           | 647.92                         |                    | 738.61                              | -90.69                         | 515.89                           | 425.20                        |
| 125              | 1974 | Liu Ercan                         | 2               | middle-class peasant     |                       | 0                      |                       |                         | 2                              |                           |                           | 2                              | 20                                     |                           |                                  |                        | 11                                   |                                      |                                         |                                 |                                                       | 20                                       | 35                         | 700                                           | 11                                             | 1.05                      | 12                                           |                     | 712                                          |                                    | 355.775                           |                                         | 246                                            | 11                       | 1.04                           | 11.44                          |                    | 182.47                              | -171.03                        | -916.79                          | -1087.82                      |
| 126              | 1974 | Wu Jingxiang                      | 2               | low-middle-class peasant | 4                     | 1                      | 0                     | 1                       | 2                              |                           | 1                         | 1                              | 18                                     |                           |                                  |                        | 91                                   |                                      |                                         |                                 | 10                                                    | 18                                       | 35                         | 630                                           | 81                                             | 1.05                      | 85                                           |                     | 715                                          |                                    | 357.525                           |                                         | 164                                            | 81                       | 1.04                           | 84.24                          |                    | 167.97                              | -83.73                         | -149.14                          | -232.87                       |

(cont.)

| Household number | Year | Name of the head of the household | Production team | Class status (1)         | Basic work points (2) | Total labor forces (3) | Male labor forces (4) | Female labor forces (5) | Total household population (6) | Age: 1 to 3 years old (7) | Age: 4 to 7 years old (8) | Age: 8 years old and above (9) | Work points of grain distribution (10) | Laboring work points (11) | Farmyard manure work points (12) | Total work points (13) | Work points of compulsory labor (14) | Work points of help cultivation (15) | Work points of private plots labor (16) | Total deducted work points (17) | Actual workdays of participation in distribution (18) | Workpoints for rations distribution (19) | Rations per workpoint (20) | Total rations received from distribution (21) | Workdays of participation in distribution (22) | Grains per workpoint (23) | Total grains distributed by work-points (24) | Grains subsidy (25) | Total Grains received from distribution (26) | Distributed grains per person (27) | Distributed grains per adult (28) | Grains received from private plots (29) | Workdays of participation in distribution (30) | Value per workpoint (31) | Total value of workpoints (32) | Money used for investment (33) | Sum of income (34) | Money distributed in this year (34) | Deposit/debt of this year (35) | Deposit/debt over the years (36) | Accumulated deposit/debt (37) |      |
|------------------|------|-----------------------------------|-----------------|--------------------------|-----------------------|------------------------|-----------------------|-------------------------|--------------------------------|---------------------------|---------------------------|--------------------------------|----------------------------------------|---------------------------|----------------------------------|------------------------|--------------------------------------|--------------------------------------|-----------------------------------------|---------------------------------|-------------------------------------------------------|------------------------------------------|----------------------------|-----------------------------------------------|------------------------------------------------|---------------------------|----------------------------------------------|---------------------|----------------------------------------------|------------------------------------|-----------------------------------|-----------------------------------------|------------------------------------------------|--------------------------|--------------------------------|--------------------------------|--------------------|-------------------------------------|--------------------------------|----------------------------------|-------------------------------|------|
| 127              | 1974 | Zhang Hengde                      | 2               | poor peasant             | 16.5                  | 3                      | 1                     | 2                       | 7                              |                           |                           | 7                              | 70                                     |                           |                                  |                        | 1178                                 |                                      |                                         |                                 | 41                                                    |                                          | 70                         | 35                                            | 2450                                           | 1137                      | 1.05                                         | 1194                | 18                                           | 3662                               | 523.1214286                       |                                         | 574                                            | 1137                     | 1.04                           | 1182.48                        |                    | 1148.15                             | 34.33                          | 1168.87                          | 1203.20                       |      |
| 128              | 1974 | Zhang Hengde                      | 2               | poor peasant             | 8                     | 1                      | 1                     | 0                       | 1                              |                           |                           | 1                              | 10                                     |                           |                                  |                        | 287                                  |                                      |                                         |                                 | 20                                                    |                                          | 10                         | 35                                            | 350                                            | 267                       | 1.05                                         | 280                 |                                              | 630                                | 630.35                            |                                         | 82                                             | 267                      | 1.04                           | 277.68                         |                    | 248.50                              | 29.18                          | 394.81                           | 423.99                        |      |
| 129              | 1974 | Wei Zhaoxiang                     | 2               | low-middle-class peasant | 14                    | 2                      | 1                     | 1                       | 3                              |                           |                           | 3                              | 30                                     |                           |                                  |                        | 447                                  |                                      |                                         |                                 | 35                                                    |                                          | 30                         | 35                                            | 1050                                           | 412                       | 1.05                                         | 433                 | 18                                           | 1501                               | 500.2                             |                                         | 246                                            | 412                      | 1.04                           | 428.48                         |                    | 732.88                              | -304.40                        | 436.73                           | 132.33                        |      |
| 130              | 1974 | Mu Zhaoren                        | 2               | poor peasant             | 24                    | 3                      | 2                     | 1                       | 7                              |                           | 1                         | 6                              | 68                                     |                           |                                  |                        | 794                                  |                                      |                                         |                                 | 60                                                    |                                          | 68                         | 35                                            | 2380                                           | 734                       | 1.05                                         | 771                 | 18                                           | 3169                               | 452.6714286                       |                                         | 574                                            | 734                      | 1.04                           | 763.36                         |                    | 748.16                              | 15.20                          | -188.94                          | -173.74                       |      |
| 131              | 1974 | Li Shiyiing                       | 2               | poor peasant             |                       | 0                      |                       |                         | 2                              |                           |                           | 2                              | 20                                     |                           |                                  |                        | 258                                  |                                      |                                         |                                 |                                                       | 20                                       | 35                         | 700                                           | 258                                            | 1.05                      | 271                                          |                     | 971                                          | 485.45                             |                                   | 164                                     | 258                                            | 1.04                     | 268.32                         |                                | 226.78             | 41.54                               | 182.62                         | 224.16                           |                               |      |
| 132              | 1974 | Wu Jinggui                        | 1               | low-middle-class peasant | 32.5                  | 6                      | 2                     | 4                       | 9                              | 1                         |                           | 8                              | 86                                     |                           |                                  |                        | 1678                                 |                                      |                                         |                                 | 81                                                    |                                          | 86                         | 35                                            | 3010                                           | 1597                      | 1.20                                         | 1916                | 18                                           | 4944                               | 549.3777778                       |                                         | 656                                            | 1597                     | 1.1                            | 1756.70                        |                    | 1606.55                             | 150.15                         | 1072.97                          | 1223.12                       |      |
| 133              | 1974 | Wu Jingfang                       | 2               | middle-class peasant     | 14                    | 2                      | 1                     | 1                       | 7                              | 1                         | 1                         | 5                              | 64                                     |                           |                                  |                        | 291                                  |                                      |                                         |                                 | 35                                                    |                                          | 64                         | 35                                            | 2240                                           | 256                       | 1.05                                         | 269                 |                                              | 2509                               | 358.4                             |                                         | 656                                            | 256                      | 1.04                           | 266.24                         |                    | 625.92                              | -359.68                        | -951.85                          | -1311.53                      |      |
| 134              | 1974 | Wu Jingyu                         | 2               | low-middle-class peasant | 24                    | 3                      | 2                     | 1                       | 6                              |                           | 1                         | 5                              | 58                                     |                           |                                  |                        | 992                                  |                                      |                                         |                                 | 60                                                    |                                          | 58                         | 35                                            | 2030                                           | 932                       | 1.05                                         | 979                 |                                              | 3009                               | 501.4333333                       |                                         | 492                                            | 932                      | 1.04                           | 969.28                         |                    | 1013.08                             | -43.80                         | 671.71                           | 627.91                        |      |
| 135              | 1974 | Wu Jinghua                        | 2               | low-middle-class peasant | 28                    | 4                      | 2                     | 2                       | 8                              | 1                         |                           | 7                              | 76                                     |                           |                                  |                        | 865                                  |                                      |                                         |                                 | 70                                                    |                                          | 76                         | 35                                            | 2609                                           | 795                       | 1.05                                         | 835                 | 18                                           | 3462                               | 432.71875                         |                                         | 492                                            | 795                      | 1.04                           | 826.80                         |                    | 1166.81                             | -340.01                        | 858.92                           | 518.91                        |      |
| 136              | 1974 | Wu Changbiao                      | 2               | middle-class peasant     |                       | 0                      |                       |                         | 1                              |                           |                           | 1                              | 10                                     |                           |                                  |                        | 220                                  |                                      |                                         |                                 |                                                       | 10                                       | 35                         | 350                                           | 220                                            | 1.05                      | 231                                          |                     | 581                                          |                                    | 581                               |                                         | 82                                             | 220                      | 1.04                           | 228.80                         |                    | 176.38                              | 52.42                          | 147.03                           | 199.45                        |      |
| 137              | 1974 | Wu Jingnan                        | 2               | middle-class peasant     | 14                    | 2                      | 1                     | 1                       | 8                              | 2                         | 1                         | 5                              | 70                                     |                           |                                  |                        | 666                                  |                                      |                                         |                                 | 10                                                    |                                          | 70                         | 35                                            | 2390                                           | 656                       | 1.05                                         | 689                 |                                              | 3079                               | 440                               |                                         | 574                                            | 656                      | 1.04                           | 682.24                         |                    | 849.38                              | -167.14                        | -154.29                          | -321.43                       |      |
| 138              | 1974 | Wu Jing'an                        | 2               | middle-class peasant     | 10                    | 1                      | 1                     | 0                       | 2                              |                           |                           | 2                              | 20                                     |                           |                                  |                        | 484                                  |                                      |                                         |                                 | 25                                                    |                                          | 20                         | 35                                            | 700                                            | 459                       | 1.05                                         | 482                 |                                              | 1182                               | 590.975                           |                                         | 246                                            | 459                      | 1.04                           | 477.36                         |                    | 304.32                              | 173.04                         | -141.94                          | 31.10                         |      |
| 139              | 1974 | Wu Jinghui                        | 2               | middle-class peasant     | 14                    | 2                      | 1                     | 1                       | 6                              | 1                         | 1                         | 4                              | 54                                     |                           |                                  |                        | 552                                  |                                      |                                         |                                 | 35                                                    |                                          | 54                         | 35                                            | 1890                                           | 517                       | 1.05                                         | 543                 | 18                                           | 2451                               | 408.475                           |                                         | 410                                            | 517                      | 1.04                           | 537.68                         |                    | 694.82                              | -157.14                        | 447.65                           | 290.51                        |      |
| 140              | 1974 | Wu Jingying                       | 2               | middle-class peasant     | 16.5                  | 3                      | 1                     | 2                       | 9                              | 1                         | 1                         | 7                              | 84                                     |                           |                                  |                        | 700                                  |                                      |                                         |                                 | 41                                                    |                                          | 84                         | 35                                            | 2940                                           | 659                       | 1.05                                         | 692                 |                                              | 3632                               | 403.55                            |                                         | 656                                            | 659                      | 1.04                           | 685.36                         |                    | 849.63                              | -164.27                        | -277.50                          | -441.77                       |      |
| 141              | 1974 | Wu Jingfu                         | 2               | middle-class peasant     | 14                    | 2                      | 1                     | 1                       | 6                              | 1                         | 2                         | 3                              | 52                                     |                           |                                  |                        | 422                                  |                                      |                                         |                                 | 35                                                    |                                          | 52                         | 35                                            | 1820                                           | 387                       | 1.05                                         | 406                 |                                              | 2226                               | 371.0583333                       |                                         | 410                                            | 387                      | 1.04                           | 402.48                         |                    | 725.44                              | -322.96                        | 55.94                            | -267.02                       |      |
| 142              | 1974 | Meng Dongmei                      | 2               | low-middle-class peasant | 4                     | 1                      | 0                     | 1                       | 5                              | 1                         | 1                         | 3                              | 44                                     |                           |                                  |                        | 47                                   |                                      |                                         |                                 | 10                                                    |                                          | 44                         | 35                                            | 1540                                           | 37                        | 1.05                                         | 39                  |                                              | 1579                               | 315.77                            |                                         | 328                                            | 37                       | 1.04                           | 38.48                          | 150                | 324.08                              | -135.60                        | 12.96                            | -122.64                       |      |
| 143              | 1974 | Mneg Tianyu                       | 2               | poor peasant             | 20.5                  | 3                      | 2                     | 1                       | 5                              |                           |                           | 5                              | 50                                     |                           |                                  |                        | 786                                  |                                      |                                         |                                 | 51                                                    |                                          | 50                         | 35                                            | 1750                                           | 735                       | 1.05                                         | 772                 |                                              | 2522                               | 504.35                            |                                         | 410                                            | 735                      | 1.04                           | 764.40                         |                    | 837.24                              | -72.84                         | 769.66                           | 696.82                        |      |
| 144              | 1974 | Xue Lanying                       | 2               | middle-class peasant     |                       | 0                      |                       |                         | 0                              |                           |                           |                                | 0                                      |                           |                                  |                        |                                      |                                      |                                         |                                 |                                                       | 0                                        | 35                         | 0                                             | 0                                              | 0                         | 1.05                                         | 0                   |                                              | 0                                  |                                   | 0                                       |                                                | 0                        | 0                              | 1.04                           | 0.00               |                                     |                                | 0.00                             |                               | 0.00 |
| 145              | 1974 | Wang Shufu                        |                 | poor peasant             | 14                    | 2                      | 1                     | 1                       | 4                              | 2                         |                           | 2                              | 32                                     |                           |                                  |                        | 535                                  |                                      |                                         |                                 | 35                                                    |                                          | 32                         | 35                                            | 1103                                           | 500                       | 1.20                                         | 525                 |                                              | 1628                               | 407                               |                                         | 246                                            | 500                      | 1.04                           | 520.00                         |                    | 467.20                              | 52.80                          | 426.92                           | 479.72                        |      |

(cont.)

| Household number | Year | Name of the head of the household | Production team | Class status (1)           | Basic work points (2) | Total labor forces (3) | Male labor forces (4) | Female labor forces (5) | Total household population (6) | Age: 1 to 3 years old (7) | Age: 4 to 7 years old (8) | Age: 8 years old and above (9) | Work points of grain distribution (10) | Laboring work points (11) | Farmyard manure work points (12) | Total work points (13) | Work points of compulsory labor (14) | Work points of help cultivation (15) | Work points of private plots labor (16) | Total deducted work points (17) | Acutal workdays of participation in distribution (18) | Workpoints for rations distribution (19) | Rations per workpoint (20) | Total rations received form distribution (21) | Workdays of participation in distribu-tion (22) | Grains per workpoint (23) | Total grains distributed by work-points (24) | Grains subsidy (25) | Total Grains received from distribution (26) | Distributed grains per person (27) | Distributed grains per adult (28) | Grains received from privated plots (29) | Workdays of participation in distribution (30) | Value per workpoint (31) | Total value of workpoints (32) | Money used for investment (33) | Sum of income (34) | Money distributed in this year (34) | Deposit/ debt of this year (35) | Deposit/ debt over the years (36) | Accumulated deposit/debt (37) |
|------------------|------|-----------------------------------|-----------------|----------------------------|-----------------------|------------------------|-----------------------|-------------------------|--------------------------------|---------------------------|---------------------------|--------------------------------|----------------------------------------|---------------------------|----------------------------------|------------------------|--------------------------------------|--------------------------------------|-----------------------------------------|---------------------------------|-------------------------------------------------------|------------------------------------------|----------------------------|-----------------------------------------------|-------------------------------------------------|---------------------------|----------------------------------------------|---------------------|----------------------------------------------|------------------------------------|-----------------------------------|------------------------------------------|------------------------------------------------|--------------------------|--------------------------------|--------------------------------|--------------------|-------------------------------------|---------------------------------|-----------------------------------|-------------------------------|
| 146              | 1974 | Li Changsheng                     | 2               | poor peasant               | 14                    | 2                      | 1                     | 1                       | 6                              |                           | 1                         | 5                              | 58                                     |                           |                                  |                        | 745                                  |                                      |                                         | 10                              |                                                       | 58                                       | 35                         | 2030                                          | 735                                             | 1.05                      | 772                                          | 2802                | 466.9583333                                  | 574                                | 735                               | 1.04                                     | 764.40                                         |                          | 738.04                         | 26.36                          | 359.77             | 386.13                              |                                 |                                   |                               |
| 147              | 1974 | Zhang Yongqing                    | 2               | poor peasant               |                       | 0                      |                       |                         | 1                              |                           |                           | 1                              | 10                                     |                           |                                  |                        | 261                                  |                                      |                                         |                                 |                                                       | 10                                       | 35                         | 350                                           | 261                                             | 1.05                      | 274                                          | 624                 | 624.05                                       | 82                                 | 261                               | 1.04                                     | 271.44                                         |                          | 210.20                         | 61.24                          | 455.23             | 516.47                              |                                 |                                   |                               |
| 148              | 1974 | Wang Suzhen                       | 2               | poor peasant               |                       | 0                      |                       |                         | 1                              |                           |                           | 1                              | 10                                     |                           |                                  |                        |                                      |                                      |                                         |                                 |                                                       | 10                                       | 35                         | 350                                           | 0                                               | 1.05                      | 0                                            | 350                 | 350                                          | 82                                 | 0                                 | 1.04                                     | 0.00                                           |                          | 58.50                          | -58.50                         | -607.72            | -666.22                             |                                 |                                   |                               |
| 149              | 1974 | Liu Chunxiang                     | 2               | upper-middle-class peasant | 28.5                  | 5                      | 2                     | 3                       | 5                              |                           |                           | 5                              | 50                                     |                           |                                  |                        | 1038                                 |                                      |                                         | 71                              |                                                       | 50                                       | 35                         | 1750                                          | 967                                             | 1.05                      | 1015                                         | 2765                | 553.07                                       | 328                                | 967                               | 1.04                                     | 1005.68                                        |                          | 1001.31                        | 4.37                           | 1318.10            | 1322.47                             |                                 |                                   |                               |
| 150              | 1974 | Liu Chunyou                       | 2               | low-middle-class peasant   | 14                    | 2                      | 1                     | 1                       | 5                              | 1                         | 1                         | 3                              | 44                                     |                           |                                  |                        | 1039                                 |                                      |                                         | 35                              |                                                       | 44                                       | 35                         | 1540                                          | 1004                                            | 1.05                      | 1054                                         | 2594                | 518.84                                       | 410                                | 1004                              | 1.04                                     | 1044.16                                        |                          | 1089.98                        | -45.82                         | 1013.81            | 967.99                              |                                 |                                   |                               |
| 151              | 1974 | Wang Kaitai                       | 2               | middle-class peasant       | 14                    | 2                      | 1                     | 1                       | 6                              | 1                         | 1                         | 4                              | 54                                     |                           |                                  |                        | 391                                  |                                      |                                         | 35                              |                                                       | 54                                       | 35                         | 1890                                          | 356                                             | 1.05                      | 374                                          | 2264                | 377.3                                        | 410                                | 356                               | 1.04                                     | 370.24                                         |                          | 547.82                         | -177.58                        | -27.50             | -205.08                             |                                 |                                   |                               |
| 152              | 1974 | Meng Minghuan                     | 2               | middle-class peasant       |                       | 0                      |                       |                         | 2                              |                           |                           | 2                              | 20                                     |                           |                                  |                        | 22                                   |                                      |                                         |                                 |                                                       | 20                                       | 35                         | 700                                           | 22                                              | 1.05                      | 23                                           | 723                 | 361.55                                       | 164                                | 22                                | 1.04                                     | 22.88                                          |                          | 168.73                         | -145.85                        | -217.61            | -363.46                             |                                 |                                   |                               |
| 153              | 1974 | Meng Qingfu                       | 2               | middle-class peasant       | 10                    | 1                      | 1                     | 0                       | 1                              |                           |                           | 1                              | 10                                     |                           |                                  |                        | 557                                  |                                      |                                         | 25                              |                                                       | 10                                       | 35                         | 350                                           | 532                                             | 1.05                      | 559                                          | 18                  | 927                                          | 926.6                              | 82                                | 532                                      | 1.04                                           | 553.28                   |                                | 388.56                         | 164.72             | 526.43                              | 691.15                          |                                   |                               |
| 154              | 1974 | Mneg Qingsheng                    | 2               | middle-class peasant       | 10                    | 1                      | 1                     | 0                       | 1                              |                           |                           | 1                              | 10                                     |                           |                                  |                        | 480                                  |                                      |                                         | 25                              |                                                       | 10                                       | 35                         | 350                                           | 455                                             | 1.05                      | 478                                          | 828                 | 827.75                                       | 82                                 | 455                               | 1.04                                     | 473.20                                         |                          | 358.12                         | 115.08                         | 556.47             | 671.55                              |                                 |                                   |                               |
| 155              | 1974 | Meng Qingbao                      | 2               | middle-class peasant       | 10                    | 1                      | 1                     | 0                       | 2                              |                           |                           | 2                              | 20                                     |                           |                                  |                        | 310                                  |                                      |                                         | 25                              |                                                       | 20                                       | 35                         | 700                                           | 285                                             | 1.05                      | 299                                          | 999                 | 499.625                                      | 164                                | 285                               | 1.04                                     | 296.40                                         |                          | 290.00                         | 6.40                           | -144.69            | -138.29                             |                                 |                                   |                               |
| 156              | 1974 | Cao Jincheng                      | 2               | poor peasant               | 10                    | 1                      | 1                     | 0                       | 1                              |                           |                           | 1                              | 10                                     |                           |                                  |                        | 353                                  |                                      |                                         | 25                              |                                                       | 10                                       | 35                         | 350                                           | 328                                             | 1.05                      | 344                                          | 694                 | 694.4                                        | 82                                 | 328                               | 1.04                                     | 341.12                                         |                          | 318.91                         | 22.21                          | 294.88             | 317.09                              |                                 |                                   |                               |
| 157              | 1974 | Cao Jinwei                        | 2               | poor peasant               | 12.5                  | 2                      | 1                     | 1                       | 2                              |                           |                           | 2                              | 20                                     |                           |                                  |                        | 324                                  |                                      |                                         | 31                              |                                                       | 20                                       | 35                         | 700                                           | 293                                             | 1.05                      | 308                                          | 1008                | 503.825                                      | 164                                | 293                               | 1.04                                     | 304.72                                         |                          | 325.37                         | -20.65                         | 405.31             | 384.66                              |                                 |                                   |                               |
| 158              | 1974 | Meng Tianlai                      | 1               | middle-class peasant       | 14                    | 2                      | 1                     | 1                       | 5                              | 2                         |                           | 3                              | 42                                     |                           |                                  |                        | 594                                  |                                      |                                         | 35                              |                                                       | 42                                       | 35                         | 1470                                          | 559                                             | 1.20                      | 671                                          | 18                  | 2159                                         | 431.76                             | 328                               | 559                                      | 1.1                                            | 614.90                   |                                | 562.89                         | 52.01              | 372.58                              | 424.59                          |                                   |                               |
| 159              | 1974 | Yu Guiying                        | 1               | poor peasant               |                       | 0                      |                       |                         | 0                              |                           |                           |                                | 0                                      |                           |                                  |                        |                                      |                                      |                                         |                                 |                                                       | 0                                        | 35                         | 0                                             | 0                                               | 1.20                      | 0                                            | 0                   | #DIV/0!                                      | 0                                  | 0                                 | 1.1                                      | 0.00                                           | 468.15                   |                                | 468.15                         | -468.15            | 0.00                                |                                 |                                   |                               |
| 160              | 1974 | Liu Chunxiao                      | 2               | upper-middle-class peasant | 14                    | 2                      | 1                     | 1                       | 4                              | 1                         |                           | 3                              | 36                                     |                           |                                  |                        | 569                                  |                                      |                                         | 35                              |                                                       | 36                                       | 35                         | 1260                                          | 534                                             | 1.05                      | 561                                          | 18                  | 1839                                         | 459.675                            | 246                               | 534                                      | 1.04                                           | 555.36                   |                                | 528.66                         | 26.70              | 350.74                              | 377.44                          |                                   |                               |
| 161              | 1974 | Meng Qinghua                      | 2               | low-middle-class peasant   | 8                     | 1                      | 1                     | 0                       | 1                              |                           |                           | 1                              | 10                                     |                           |                                  |                        | 162                                  |                                      |                                         | 20                              |                                                       | 10                                       | 35                         | 350                                           | 142                                             | 1.05                      | 149                                          | 499                 | 499.1                                        | 82                                 | 142                               | 1.04                                     | 147.68                                         |                          | 160.28                         | -12.60                         | 179.56             | 166.96                              |                                 |                                   |                               |
| 162              | 1974 | Meng Peigui                       | 2               | rich peasant               | 10.5                  | 2                      | 1                     | 1                       | 2                              |                           |                           | 2                              | 20                                     |                           |                                  |                        | 309                                  |                                      |                                         | 46                              |                                                       | 20                                       | 35                         | 700                                           | 263                                             | 1.05                      | 276                                          | 976                 | 488.075                                      | 164                                | 263                               | 1.04                                     | 273.52                                         |                          | 269.85                         | 3.67                           | 253.81             | 257.48                              |                                 |                                   |                               |
| 163              | 1974 | Meng Peiji                        | 2               | rich peasant               | 18                    | 3                      | 1                     | 2                       | 7                              |                           |                           | 7                              | 70                                     |                           |                                  |                        | 917                                  |                                      |                                         | 70                              |                                                       | 70                                       | 35                         | 2450                                          | 847                                             | 1.05                      | 889                                          | 18                  | 3357                                         | 479.6214286                        | 574                               | 847                                      | 1.04                                           | 880.88                   |                                | 796.51                         | 84.37              | 257.87                              | 342.24                          |                                   |                               |
| 164              | 1974 | Meng Jinghuan                     | 2               | upper-middle-class peasant | 4                     | 1                      | 0                     | 1                       | 4                              | 1                         |                           | 3                              | 36                                     |                           |                                  |                        | 309                                  |                                      |                                         | 10                              |                                                       | 36                                       | 35                         | 1260                                          | 299                                             | 1.05                      | 314                                          | 1574                | 393.4875                                     | 328                                | 299                               | 1.04                                     | 310.96                                         |                          | 307.79                         | 3.17                           | 133.99             | 137.16                              |                                 |                                   |                               |
| 165              | 1974 | Lan Jinzhi                        | 1               | poor peasant               | 12.5                  | 2                      | 1                     | 1                       | 6                              |                           |                           | 6                              | 60                                     |                           |                                  |                        | 666                                  |                                      |                                         | 31                              |                                                       | 60                                       | 35                         | 2100                                          | 635                                             | 1.20                      | 762                                          | 2862                | 477                                          | 574                                | 635                               | 1.1                                      | 698.50                                         |                          | 685.99                         | 12.51                          | 365.82             | 378.33                              |                                 |                                   |                               |

(cont.)

| Household number | Year | Name of the head of the household | Production team | Class status (1)           | Basic work points (2) | Total labor forces (3) | Male labor forces (4) | Female labor forces (5) | Total household population (6) | Age: 1 to 3 years old (7) | Age: 4 to 7 years old (8) | Age: 8 years old and above (9) | Work points of grain distribution (10) | Laboring work points (11) | Farmyard manure work points (12) | Total work points (13) | Work points of compulsory labor (14) | Work points of help cultivation (15) | Work points of private plots labor (16) | Total deducted work points (17) | Actual workdays of participation in distribution (18) | Workpoints for rations distribution (19) | Rations per workpoint (20) | Total rations received from distribution (21) | Workdays of participation in distribution (22) | Grains per workpoint (23) | Total grains distributed by work-points (24) | Grains subsidy (25) | Total Grains received from distribution (26) | Distributed grains per person (27) | Distributed grains per adult (28) | Grains received from private plots (29) | Workdays of participation in distribution (30) | Value per workpoint (31) | Total value of workpoints (32) | Money used for investment (33) | Sum of income (34) | Money distributed in this year (34) | Deposit/debt of this year (35) | Deposit/debt over the years (36) | Accumulated deposit/debt (37) |
|------------------|------|-----------------------------------|-----------------|----------------------------|-----------------------|------------------------|-----------------------|-------------------------|--------------------------------|---------------------------|---------------------------|--------------------------------|----------------------------------------|---------------------------|----------------------------------|------------------------|--------------------------------------|--------------------------------------|-----------------------------------------|---------------------------------|-------------------------------------------------------|------------------------------------------|----------------------------|-----------------------------------------------|------------------------------------------------|---------------------------|----------------------------------------------|---------------------|----------------------------------------------|------------------------------------|-----------------------------------|-----------------------------------------|------------------------------------------------|--------------------------|--------------------------------|--------------------------------|--------------------|-------------------------------------|--------------------------------|----------------------------------|-------------------------------|
| 166              | 1974 | Wang Jinshu                       | 2               | upper-middle-class peasant |                       | 0                      |                       |                         | 1                              |                           |                           | 1                              | 10                                     |                           |                                  |                        |                                      |                                      |                                         |                                 |                                                       | 10                                       | 35                         | 350                                           | 0                                              | 1.05                      | 0                                            | 350                 | 350                                          |                                    | 82                                | 0                                       | 1.04                                           | 0.00                     |                                | 49.75                          | -49.75             | -103.35                             | -153.10                        |                                  |                               |
| 167              | 1974 | Cao Xiangyun                      | 2               | upper-middle-class peasant | 18                    | 3                      | 1                     | 2                       | 6                              |                           | 1                         | 5                              | 58                                     |                           |                                  |                        | 656                                  |                                      |                                         |                                 | 45                                                    |                                          | 58                         | 35                                            | 2030                                           | 611                       | 1.05                                         | 642                 |                                              | 2672                               | 445.2583333                       | 492                                     | 611                                            | 1.04                     | 635.44                         |                                | 526.85             | 108.59                              | 261.89                         | 370.48                           |                               |
| 168              | 1974 | Li Shibao                         | 2               | poor peasant               | 16.5                  | 3                      | 1                     | 2                       | 9                              | 1                         |                           | 8                              | 86                                     |                           |                                  |                        | 724                                  |                                      |                                         |                                 | 41                                                    |                                          | 86                         | 35                                            | 3010                                           | 683                       | 1.05                                         | 717                 |                                              | 3727                               | 414.1277778                       | 738                                     | 683                                            | 1.04                     | 710.32                         | 10                             | 809.57             | -89.25                              | -853.98                        | -943.23                          |                               |
| 169              | 1974 | Wang Kailu                        | 2               | poor peasant               | 20.5                  | 3                      | 2                     | 1                       | 5                              |                           |                           | 5                              | 50                                     |                           |                                  |                        | 1000                                 |                                      |                                         |                                 | 51                                                    |                                          | 50                         | 35                                            | 1750                                           | 949                       | 1.05                                         | 996                 | 18                                           | 2764                               | 552.89                            | 410                                     | 949                                            | 1.04                     | 986.96                         |                                | 1103.92            | -116.96                             | 690.05                         | 573.09                           |                               |
| 170              | 1974 | Zhao Hongrui                      | 1               | middle-class peasant       | 38                    | 5                      | 3                     | 2                       | 9                              | 1                         | 1                         | 7                              | 84                                     |                           |                                  |                        | 1583                                 |                                      |                                         |                                 | 95                                                    |                                          | 84                         | 35                                            | 2940                                           | 1488                      | 1.20                                         | 1786                | 18                                           | 4744                               | 527.0666667                       | 738                                     | 1488                                           | 1.1                      | 1636.80                        |                                | 1521.90            | 114.90                              | 1216.15                        | 1331.05                          |                               |
| 171              | 1974 | Fang Chunxing                     | 0               | middle-class peasant       |                       | 0                      |                       |                         | 0                              |                           |                           |                                | 0                                      |                           |                                  |                        |                                      |                                      |                                         |                                 | 0                                                     | 35                                       | 0                          | 0                                             | 1.20                                           | 0                         | 0                                            |                     | 0                                            | #DIV/0!                            | 0                                 | 0                                       |                                                | 0.00                     |                                | 0.00                           |                    | 0.00                                |                                |                                  |                               |
| 172              | 1974 | Zhao Honglin                      | 2               | middle-class peasant       | 12                    | 2                      | 1                     | 1                       | 5                              |                           | 1                         | 4                              | 48                                     |                           |                                  |                        | 240                                  |                                      |                                         |                                 | 30                                                    |                                          | 48                         | 35                                            | 1680                                           | 210                       | 1.05                                         | 221                 |                                              | 1901                               | 380.1                             | 410                                     | 210                                            | 1.04                     | 218.40                         | 100                            | 356.10             | -37.70                              | -146.52                        | -184.22                          |                               |
| 173              | 1974 | Yu Jinquan                        | 0               | poor peasant               |                       | 0                      |                       |                         | 0                              |                           |                           |                                | 0                                      |                           |                                  |                        |                                      |                                      |                                         |                                 | 0                                                     | 35                                       | 0                          | 0                                             | 1.20                                           | 0                         | 0                                            |                     | 0                                            | #DIV/0!                            | 0                                 | 0                                       |                                                | 0.00                     |                                | 0.00                           |                    | 0.00                                |                                |                                  |                               |
| 174              | 1974 | Yu Jinliang                       | 0               | poor peasant               |                       | 0                      |                       |                         | 0                              |                           |                           |                                | 0                                      |                           |                                  |                        |                                      |                                      |                                         |                                 | 0                                                     | 35                                       | 0                          | 0                                             | 1.20                                           | 0                         | 0                                            |                     | 0                                            | #DIV/0!                            | 0                                 | 0                                       |                                                | 0.00                     |                                | 0.00                           |                    | 0.00                                |                                |                                  |                               |
| 175              | 1974 | Mu Zhaoxin                        | 2               | poor peasant               | 4                     | 1                      | 0                     | 1                       | 3                              | 1                         | 1                         | 1                              | 24                                     |                           |                                  |                        | 105                                  |                                      |                                         |                                 | 10                                                    |                                          | 24                         | 35                                            | 840                                            | 95                        | 1.05                                         | 100                 |                                              | 940                                | 313.25                            | 246                                     | 95                                             | 1.04                     | 98.80                          |                                | 189.73             | -90.93                              | -12.84                         | -103.77                          |                               |
| 176              | 1974 | Wang Guijing                      | 0               | poor peasant               |                       | 0                      |                       |                         | 0                              |                           |                           |                                | 0                                      |                           |                                  |                        |                                      |                                      |                                         |                                 | 0                                                     | 35                                       | 0                          | 0                                             | 1.20                                           | 0                         | 0                                            |                     | 0                                            | #DIV/0!                            | 0                                 | 0                                       |                                                | 0.00                     |                                | 0.00                           |                    | 0.00                                |                                |                                  |                               |
| 177              | 1974 | Zhang Xuezhong                    | 1               | low-middle-class peasant   | 20.5                  | 4                      | 1                     | 3                       | 9                              |                           | 2                         | 7                              | 86                                     |                           |                                  |                        | 846                                  |                                      |                                         |                                 | 51                                                    |                                          | 86                         | 35                                            | 3010                                           | 795                       | 1.20                                         | 954                 |                                              | 3964                               | 440.4444444                       | 738                                     | 795                                            | 1.1                      | 874.50                         |                                | 885.43             | -10.93                              | -1271.38                       | -1282.31                         |                               |
| 178              | 1974 | Jia Anji                          | 2               | poor peasant               | 14                    | 2                      | 1                     | 1                       | 6                              | 1                         |                           | 5                              | 56                                     |                           |                                  |                        | 735                                  |                                      |                                         |                                 | 35                                                    |                                          | 56                         | 35                                            | 1960                                           | 700                       | 1.05                                         | 735                 | 18                                           | 2713                               | 452.1666667                       | 410                                     | 700                                            | 1.04                     | 728.00                         |                                | 733.93             | -5.93                               | 327.89                         | 321.96                           |                               |
| 179              | 1974 | Liu Peishou                       | 1               | middle-class peasant       | 12.5                  | 2                      | 1                     | 1                       | 4                              |                           |                           | 4                              | 40                                     |                           |                                  |                        | 956                                  |                                      |                                         |                                 | 31                                                    |                                          | 40                         | 35                                            | 1400                                           | 925                       | 1.20                                         | 1110                |                                              | 2510                               | 627.5                             | 328                                     | 925                                            | 1.1                      | 1017.50                        |                                | 754.36             | 263.14                              | 918.09                         | 1181.23                          |                               |
| 180              | 1974 | Gao Yunxian                       | 2               | middle-class peasant       | 38                    | 5                      | 3                     | 2                       | 10                             | 1                         |                           | 9                              | 96                                     |                           |                                  |                        | 1425                                 |                                      |                                         |                                 | 95                                                    |                                          | 96                         | 35                                            | 3275                                           | 1330                      | 1.05                                         | 1397                | 36                                           | 4708                               | 470.75                            | 738                                     | 1330                                           | 1.04                     | 1383.20                        |                                | 1134.89            | 248.31                              | 382.73                         | 631.04                           |                               |
| 181              | 1974 | Tian Kehua                        | 2               | middle-class peasant       |                       | 0                      |                       |                         | 1                              |                           |                           | 1                              | 10                                     |                           |                                  |                        | 81                                   |                                      |                                         |                                 |                                                       | 10                                       | 35                         | 350                                           |                                                | 81                        | 1.05                                         | 85                  |                                              | 435                                | 435.05                            | 82                                      | 81                                             | 1.04                     | 84.24                          |                                | 102.95             | -18.71                              | -55.64                         | -74.35                           |                               |
| 182              | 1974 | Tian Dawei                        | 1               | middle-class peasant       | 14                    | 2                      | 1                     | 1                       | 6                              | 1                         | 1                         | 4                              | 54                                     |                           |                                  |                        | 578                                  |                                      |                                         |                                 | 35                                                    |                                          | 54                         | 35                                            | 1890                                           | 543                       | 1.20                                         | 652                 | 18                                           | 2560                               | 426.6                             | 410                                     | 543                                            | 1.1                      | 597.30                         |                                | 676.13             | -78.83                              | 72.74                          | -6.09                            |                               |
| 183              | 1974 | Fan Liyuan                        | 2               | middle-class peasant       | 22                    | 3                      | 2                     | 1                       | 4                              |                           |                           | 4                              | 40                                     |                           |                                  |                        | 782                                  |                                      |                                         |                                 | 55                                                    |                                          | 40                         | 35                                            | 1400                                           | 727                       | 1.05                                         | 763                 |                                              | 2163                               | 540.8375                          | 328                                     | 727                                            | 1.04                     | 756.08                         |                                | 701.84             | 54.24                               | 697.18                         | 751.42                           |                               |
| 184              | 1974 | Fan Shutang                       | 1               | middle-class peasant       | 14                    | 2                      | 1                     | 1                       | 7                              | 1                         | 1                         | 5                              | 64                                     |                           |                                  |                        | 438                                  |                                      |                                         |                                 | 35                                                    |                                          | 64                         | 35                                            | 2240                                           | 403                       | 1.20                                         | 484                 | 18                                           | 2742                               | 391.6571429                       | 492                                     | 403                                            | 1.1                      | 443.30                         |                                | 668.13             | -224.83                             | -112.90                        | -337.73                          |                               |



(cont.)

| Household number | Year | Name of the head of the household | Production team | Class status (1)           | Basic work points (2) | Total labor forces (3) | Male labor forces (4) | Female labor forces (5) | Total household population (6) | Age: 1 to 3 years old (7) | Age: 4 to 7 years old (8) | Age: 8 years old and above (9) | Work points of grain distribution (10) | Laboring work points (11) | Farmyard manure work points (12) | Total work points (13) | Work points of compulsory labor (14) | Work points of help cultivation (15) | Work points of private plots labor (16) | Total deducted work points (17) | Acutal workdays of participation in distribution (18) | Workpoints for rations distribution (19) | Rations per workpoint (20) | Total rations received form distribution (21) | Workdays of participation in distribu-tion (22) | Grains per workpoint (23) | Total grains distributed by work-points (24) | Grains subsidy (25) | Total Grains received from distribution (26) | Distributed grains per person (27) | Distributed grains per adult (28) | Grains received from privated plots (29) | Workdays of participation in distribution (30) | Value per workpoint (31) | Total value of workpoints (32) | Money used for investment (33) | Sum of income (34) | Money distributed in this year (34) | Deposit/ debt of this year (35) | Deposit/ debt over the years (36) | Accumulated deposit/debt (37) |        |
|------------------|------|-----------------------------------|-----------------|----------------------------|-----------------------|------------------------|-----------------------|-------------------------|--------------------------------|---------------------------|---------------------------|--------------------------------|----------------------------------------|---------------------------|----------------------------------|------------------------|--------------------------------------|--------------------------------------|-----------------------------------------|---------------------------------|-------------------------------------------------------|------------------------------------------|----------------------------|-----------------------------------------------|-------------------------------------------------|---------------------------|----------------------------------------------|---------------------|----------------------------------------------|------------------------------------|-----------------------------------|------------------------------------------|------------------------------------------------|--------------------------|--------------------------------|--------------------------------|--------------------|-------------------------------------|---------------------------------|-----------------------------------|-------------------------------|--------|
| 185              | 1974 | Fan Chunxiang                     | 1               | middle-class peasant       | 4                     | 1                      | 0                     | 1                       | 4                              | 1                         |                           | 3                              | 36                                     |                           |                                  |                        | 122                                  |                                      |                                         | 10                              |                                                       | 36                                       | 35                         | 1260                                          | 112                                             | 1.20                      | 134                                          |                     | 1394                                         |                                    | 348.6                             |                                          | 246                                            | 112                      | 1.1                            | 123.20                         | 50                 |                                     | 272.61                          | -99.41                            | 24.31                         | -75.10 |
| 186              | 1974 | Lian Huaizhe                      | 1               | poor peasant               | 8                     | 2                      | 1                     | 1                       | 3                              |                           |                           | 3                              | 30                                     |                           |                                  |                        | 516                                  |                                      |                                         | 20                              |                                                       | 30                                       | 35                         | 1050                                          | 496                                             | 1.20                      | 595                                          |                     | 1645                                         |                                    | 548.4                             |                                          | 246                                            | 496                      | 1.1                            | 545.60                         |                    |                                     | 536.96                          | 8.64                              | 292.31                        | 300.95 |
| 187              | 1974 | Lian Wenbing                      | 2               | poor peasant               | 14                    | 2                      | 1                     | 1                       | 5                              | 1                         | 1                         | 3                              | 44                                     |                           |                                  |                        | 502                                  |                                      |                                         | 35                              |                                                       | 44                                       | 35                         | 1540                                          | 467                                             | 1.05                      | 490                                          |                     | 2030                                         | 406.07                             |                                   | 410                                      | 467                                            | 1.04                     | 485.68                         |                                |                    | 512.32                              | -26.64                          | -220.73                           | -247.37                       |        |
| 188              | 1974 | Wu Congyi                         | 2               | poor peasant               | 14                    | 2                      | 1                     | 1                       | 7                              | 1                         | 1                         | 5                              | 64                                     |                           |                                  |                        | 477                                  |                                      |                                         | 35                              |                                                       | 64                                       | 35                         | 2240                                          | 442                                             | 1.05                      | 464                                          | 18                  | 2722                                         | 388.8714286                        |                                   | 565                                      | 442                                            | 1.04                     | 459.68                         |                                |                    | 672.97                              | -213.29                         | -636.05                           | -849.34                       |        |
| 189              | 1974 | Wu Laifu                          | 1               | poor peasant               | 14                    | 2                      | 1                     | 1                       | 7                              | 1                         | 1                         | 5                              | 64                                     |                           |                                  |                        | 510                                  |                                      |                                         | 35                              |                                                       | 64                                       | 35                         | 2240                                          | 475                                             | 1.20                      | 570                                          |                     | 2810                                         | 401.4285714                        |                                   | 492                                      | 475                                            | 1.1                      | 522.50                         |                                |                    | 603.88                              | -81.38                          | -375.13                           | -456.51                       |        |
| 190              | 1974 | Tian Dayu                         | 2               | poor peasant               |                       | 0                      |                       |                         | 1                              |                           |                           | 1                              | 10                                     |                           |                                  |                        | 360                                  |                                      |                                         | 10                              |                                                       | 35                                       | 350                        | 360                                           | 1.05                                            | 378                       |                                              | 728                 |                                              | 728                                |                                   | 82                                       | 360                                            | 1.04                     | 374.40                         |                                |                    | 271.30                              | 103.10                          | 442.42                            | 545.52                        |        |
| 191              | 1974 | Liu Shuting                       | 2               | poor peasant               | 4                     | 1                      | 0                     | 1                       | 5                              | 1                         |                           | 4                              | 46                                     |                           |                                  |                        | 279                                  |                                      |                                         | 10                              |                                                       | 46                                       | 35                         | 1610                                          | 269                                             | 1.05                      | 282                                          |                     | 1892                                         | 366                                |                                   | 328                                      | 269                                            | 1.04                     | 279.76                         |                                |                    | 357.59                              | -77.83                          | 77.90                             | 0.07                          |        |
| 192              | 1974 | Meng Tiande                       | 2               | poor peasant               | 14                    | 2                      | 1                     | 1                       | 7                              |                           |                           | 7                              | 70                                     |                           |                                  |                        | 784                                  |                                      |                                         | 35                              |                                                       | 70                                       | 35                         | 2450                                          | 749                                             | 1.05                      | 786                                          | 18                  | 3254                                         | 464.9214286                        |                                   | 574                                      | 749                                            | 1.04                     | 778.96                         |                                |                    | 773.39                              | 5.57                            | -83.97                            | -78.40                        |        |
| 193              | 1974 | Meng Xiulian                      | 2               | poor peasant               | 4                     | 1                      | 0                     | 1                       | 1                              |                           |                           | 1                              | 10                                     |                           |                                  |                        | 46                                   |                                      |                                         | 10                              |                                                       | 35                                       | 350                        | 36                                            | 1.05                                            | 38                        |                                              | 388                 |                                              | 387.8                              |                                   | 82                                       | 36                                             | 1.04                     | 37.44                          |                                |                    | 86.20                               | -48.76                          | 39.63                             | -9.13                         |        |
| 194              | 1974 | Tian Genlong                      | 2               | poor peasant               | 14                    | 2                      | 1                     | 1                       | 7                              | 1                         | 1                         | 5                              | 64                                     |                           |                                  |                        | 550                                  |                                      |                                         | 35                              |                                                       | 64                                       | 35                         | 2240                                          | 515                                             | 1.05                      | 541                                          |                     | 2781                                         | 397.25                             |                                   | 492                                      | 515                                            | 1.04                     | 535.60                         | 3.56                           |                    | 679.69                              | -140.53                         | -383.56                           | -524.09                       |        |
| 195              | 1974 | Zhao Jinlan                       | 2               | poor peasant               | 4                     | 1                      | 0                     | 1                       | 6                              | 1                         | 1                         | 4                              | 54                                     |                           |                                  |                        | 277                                  |                                      |                                         | 10                              |                                                       | 54                                       | 35                         | 1890                                          | 267                                             | 1.05                      | 280                                          |                     | 2170                                         | 361.725                            |                                   | 410                                      | 267                                            | 1.04                     | 277.68                         | 160                            |                    | 452.71                              | -15.03                          | -12.46                            | -27.49                        |        |
| 196              | 1974 | Liu Peiren                        | 2               | middle-class peasant       | 14                    | 2                      | 1                     | 1                       | 5                              | 1                         | 1                         | 3                              | 44                                     |                           |                                  |                        | 391                                  |                                      |                                         | 35                              |                                                       | 44                                       | 35                         | 1540                                          | 356                                             | 1.05                      | 374                                          |                     | 1914                                         | 382.76                             |                                   | 410                                      | 356                                            | 1.04                     | 370.24                         |                                |                    | 449.95                              | -79.71                          | 100.04                            | 20.33                         |        |
| 197              | 1974 | Liu Peizhu                        | 2               | middle-class peasant       | 10                    | 1                      | 1                     | 0                       | 2                              |                           |                           | 2                              | 20                                     |                           |                                  |                        | 382                                  |                                      |                                         | 25                              |                                                       | 20                                       | 35                         | 700                                           | 357                                             | 1.05                      | 375                                          |                     | 1075                                         | 537.425                            |                                   | 164                                      | 357                                            | 1.04                     | 371.28                         |                                |                    | 337.82                              | 33.46                           | 351.43                            | 384.89                        |        |
| 198              | 1974 | Liu Peijie                        | 2               | middle-class peasant       | 16                    | 3                      | 1                     | 2                       | 6                              | 1                         | 1                         | 4                              | 54                                     |                           |                                  |                        | 238                                  |                                      |                                         | 40                              |                                                       | 54                                       | 35                         | 1890                                          | 198                                             | 1.05                      | 208                                          |                     | 2098                                         | 349.65                             |                                   | 410                                      | 198                                            | 1.04                     | 205.92                         | 30                             |                    | 447.42                              | -211.50                         | -82.58                            | -294.08                       |        |
| 199              | 1974 | Meng Guilan                       | 2               | poor peasant               | 4                     | 1                      | 0                     | 1                       | 5                              |                           | 1                         | 4                              | 48                                     |                           |                                  |                        | 263                                  |                                      |                                         | 10                              |                                                       | 48                                       | 35                         | 1680                                          | 253                                             | 1.05                      | 266                                          |                     | 1946                                         | 389.13                             |                                   | 328                                      | 253                                            | 1.04                     | 263.12                         |                                |                    | 355.64                              | -92.52                          | 106.57                            | 14.05                         |        |
| 200              | 1974 | Wang Lianxiang                    | 2               | poor peasant               | 2.5                   | 1                      | 0                     | 1                       | 2                              |                           |                           | 2                              | 20                                     |                           |                                  |                        | 188                                  |                                      |                                         | 6                               |                                                       | 20                                       | 35                         | 700                                           | 182                                             | 1.05                      | 191                                          |                     | 891                                          | 445.55                             |                                   | 164                                      | 182                                            | 1.04                     | 189.28                         |                                |                    | 183.79                              | 5.49                            | 117.99                            | 123.48                        |        |
| 201              | 1974 | Wang Ende                         | 2               | poor peasant               |                       | 0                      |                       |                         | 1                              |                           |                           | 1                              | 10                                     |                           |                                  |                        |                                      |                                      |                                         |                                 |                                                       | 10                                       | 35                         | 350                                           | 0                                               | 1.05                      | 0                                            |                     | 350                                          |                                    |                                   | 164                                      | 0                                              | 1.04                     | 0.00                           |                                |                    | 90.47                               | -90.47                          | 123.83                            | 33.36                         |        |
| 202              | 1974 | Meng Mingqing                     | 2               | low-middle-class peasant   |                       | 0                      |                       |                         | 2                              |                           |                           | 2                              | 20                                     |                           |                                  |                        | 387                                  |                                      |                                         |                                 |                                                       | 20                                       | 35                         | 700                                           | 387                                             | 1.05                      | 406                                          |                     | 1106                                         | 553.175                            |                                   | 164                                      | 387                                            | 1.04                     | 402.48                         |                                |                    | 327.65                              | 74.83                           | 415.07                            | 489.90                        |        |
| 203              | 1974 | Meng Tianseng                     | 2               | low-middle-class peasant   | 14                    | 2                      | 1                     | 1                       | 5                              | 1                         | 1                         | 3                              | 44                                     |                           |                                  |                        | 454                                  |                                      |                                         | 35                              |                                                       | 44                                       | 35                         | 1540                                          | 419                                             | 1.05                      | 440                                          |                     | 1980                                         | 395.99                             |                                   | 410                                      | 419                                            | 1.04                     | 435.76                         |                                |                    | 541.25                              | -105.49                         | 292.69                            | 187.20                        |        |
| 204              | 1974 | Wang Yueming                      | 2               | poor peasant               | 12                    | 2                      | 1                     | 1                       | 10                             |                           | 1                         | 9                              | 98                                     |                           |                                  |                        | 540                                  |                                      |                                         | 30                              |                                                       | 98                                       | 35                         | 3430                                          | 510                                             | 1.05                      | 536                                          |                     | 3966                                         | 396.55                             |                                   | 820                                      | 510                                            | 1.04                     | 530.40                         |                                |                    | 712.90                              | -182.50                         | 210.32                            | 27.82                         |        |
| 205              | 1974 | Wang Heshun                       | 2               | poor peasant               | 14.5                  | 3                      | 1                     | 2                       | 5                              |                           |                           | 5                              | 50                                     |                           |                                  |                        | 519                                  |                                      |                                         | 36                              |                                                       | 50                                       | 35                         | 1750                                          | 483                                             | 1.05                      | 507                                          |                     | 2257                                         | 451.43                             |                                   | 410                                      | 483                                            | 1.04                     | 502.32                         |                                |                    | 529.14                              | -26.82                          | 81.03                             | 54.21                         |        |
| 206              | 1974 | Wen Yingjie                       | 2               | upper-middle-class peasant | 14.5                  | 3                      | 1                     | 2                       | 4                              |                           |                           | 4                              | 40                                     |                           |                                  |                        | 731                                  |                                      |                                         | 36                              |                                                       | 40                                       | 35                         | 1400                                          | 695                                             | 1.05                      | 730                                          |                     | 2130                                         | 532.4375                           |                                   | 328                                      | 695                                            | 1.04                     | 722.80                         |                                |                    | 679.27                              | 43.53                           | 565.59                            | 609.12                        |        |
| 207              | 1974 | Liu Peiqian                       | 2               | low-middle-class peasant   | 26.5                  | 4                      | 2                     | 2                       | 9                              |                           |                           | 9                              | 90                                     |                           |                                  |                        | 1219                                 |                                      |                                         | 66                              |                                                       | 90                                       | 35                         | 3063                                          | 1153                                            | 1.05                      | 1211                                         | 36                  | 4310                                         | 478.85                             |                                   | 656                                      | 1153                                           | 1.04                     | 1199.12                        |                                |                    | 1582.48                             | -383.36                         | 391.67                            | 8.31                          |        |

(cont.)

| Household number | Year | Name of the head of the household | Production team | Class status (1)         | Basic work points (2) | Total labor forces (3) | Male labor forces (4) | Female labor forces (5) | Total household population (6) | Age: 1 to 3 years old (7) | Age: 4 to 7 years old (8) | Age: 8 years old and above (9) | Work points of grain distribution (10) | Laboring work points (11) | Farmyard manure work points (12) | Total work points (13) | Work points of compulsory labor (14) | Work points of help cultivation (15) | Work points of private plots labor (16) | Total deducted work points (17) | Actual workdays of participation in distribution (18) | Workpoints for rations distribution (19) | Rations per workpoint (20) | Total rations received from distribution (21) | Workdays of participation in distribution (22) | Grains per workpoint (23) | Total grains distributed by work-points (24) | Grains subsidy (25) | Total Grains received from distribution (26) | Distributed grains per person (27) | Distributed grains per adult (28) | Grains received from private plots (29) | Workdays of participation in distribution (30) | Value per workpoint (31) | Total value of workpoints (32) | Money used for investment (33) | Sum of income (34) | Money distributed in this year (34) | Deposit/debt of this year (35) | Deposit/debt over the years (36) | Accumulated deposit/debt (37) |
|------------------|------|-----------------------------------|-----------------|--------------------------|-----------------------|------------------------|-----------------------|-------------------------|--------------------------------|---------------------------|---------------------------|--------------------------------|----------------------------------------|---------------------------|----------------------------------|------------------------|--------------------------------------|--------------------------------------|-----------------------------------------|---------------------------------|-------------------------------------------------------|------------------------------------------|----------------------------|-----------------------------------------------|------------------------------------------------|---------------------------|----------------------------------------------|---------------------|----------------------------------------------|------------------------------------|-----------------------------------|-----------------------------------------|------------------------------------------------|--------------------------|--------------------------------|--------------------------------|--------------------|-------------------------------------|--------------------------------|----------------------------------|-------------------------------|
| 208              | 1974 | Liu Zhaoji                        | 2               | low-middle-class peasant | 14                    | 2                      | 1                     | 1                       | 6                              | 2                         | 1                         | 3                              | 50                                     |                           |                                  |                        | 456                                  |                                      |                                         |                                 | 35                                                    | 50                                       | 35                         | 1665                                          | 421                                            | 1.05                      | 442                                          | 18                  | 2125                                         | 354.175                            |                                   | 492                                     | 421                                            | 1.04                     | 437.84                         |                                | 546.46             | -108.62                             | 109.57                         | 0.95                             |                               |
| 209              | 1974 | Yu Shengliang                     | 2               | poor peasant             | 4                     | 1                      | 0                     | 1                       | 2                              |                           |                           | 2                              | 20                                     |                           |                                  |                        | 301                                  |                                      |                                         |                                 | 10                                                    | 20                                       | 35                         | 787                                           | 291                                            | 1.05                      | 306                                          |                     | 1093                                         | 546.275                            |                                   | 246                                     | 291                                            | 1.04                     | 302.64                         |                                | 350.38             | -47.74                              | 277.71                         | 229.97                           |                               |
| 210              | 1974 | Meng Tianyou                      | 1               | poor peasant             |                       | 0                      |                       |                         | 1                              |                           |                           | 1                              | 10                                     |                           |                                  |                        | 148                                  |                                      |                                         |                                 |                                                       | 10                                       | 35                         | 350                                           | 148                                            | 1.20                      | 178                                          |                     | 528                                          | 527.6                              |                                   | 82                                      | 148                                            | 1.1                      | 162.80                         |                                | 145.85             | 16.95                               | 182.66                         | 199.61                           |                               |
| 211              | 1974 | Meng Tianfu                       | 2               | middle-class peasant     | 14.5                  | 3                      | 1                     | 2                       | 8                              | 1                         | 1                         | 6                              | 74                                     |                           |                                  |                        | 646                                  |                                      |                                         |                                 | 36                                                    | 74                                       | 35                         | 2590                                          | 610                                            | 1.05                      | 641                                          |                     | 3231                                         | 403.8125                           |                                   | 574                                     | 610                                            | 1.04                     | 634.40                         |                                | 775.11             | -140.71                             | 181.05                         | 40.34                            |                               |
| 212              | 1974 | Meng Xisheng                      | 2               | middle-class peasant     | 14                    | 2                      | 1                     | 1                       | 6                              | 2                         | 1                         | 3                              | 50                                     |                           |                                  |                        | 566                                  |                                      |                                         |                                 | 35                                                    | 50                                       | 35                         | 1750                                          | 531                                            | 1.05                      | 558                                          |                     | 2308                                         | 384.5916667                        |                                   | 492                                     | 531                                            | 1.04                     | 552.24                         |                                | 695.67             | -143.43                             | 169.08                         | 25.65                            |                               |
| 213              | 1974 | Gui Tiankuan                      | 2               | poor peasant             | 28.5                  | 5                      | 2                     | 3                       | 7                              |                           |                           | 7                              | 70                                     |                           |                                  |                        | 1194                                 |                                      |                                         |                                 | 71                                                    | 70                                       | 35                         | 2450                                          | 1123                                           | 1.05                      | 1179                                         | 18                  | 3647                                         | 517                                |                                   | 574                                     | 1123                                           | 1.04                     | 1167.92                        | 42.75                          | 1484.06            | -273.39                             | 1313.23                        | 1039.84                          |                               |
| 214              | 1974 | Kang Huaizhi                      | 2               | poor peasant             | 14                    | 2                      | 1                     | 1                       | 8                              | 1                         | 1                         | 6                              | 74                                     |                           |                                  |                        | 783                                  |                                      |                                         |                                 | 35                                                    | 74                                       | 35                         | 2590                                          | 748                                            | 1.05                      | 785                                          |                     | 3375                                         | 421.925                            |                                   | 656                                     | 748                                            | 1.04                     | 777.92                         |                                | 764.92             | 13.00                               | -1252.37                       | -1239.37                         |                               |
| 215              | 1974 | Liu Huaqing                       | 2               | poor peasant             | 12                    | 2                      | 1                     | 1                       | 6                              |                           | 2                         | 4                              | 56                                     |                           |                                  |                        | 534                                  |                                      |                                         |                                 | 30                                                    | 56                                       | 35                         | 1960                                          | 504                                            | 1.05                      | 529                                          |                     | 2489                                         | 414.8666667                        |                                   | 492                                     | 504                                            | 1.04                     | 524.16                         |                                | 467.20             | 56.96                               | 79.92                          | 136.88                           |                               |
| 216              | 1974 | Meng Xiuying                      | 2               | poor peasant             | 6.5                   | 2                      | 0                     | 2                       | 4                              | 1                         | 1                         | 2                              | 34                                     |                           |                                  |                        | 251                                  |                                      |                                         |                                 | 16                                                    | 34                                       | 35                         | 1190                                          | 235                                            | 1.05                      | 247                                          |                     | 1437                                         | 359.1875                           |                                   | 410                                     | 235                                            | 1.04                     | 244.40                         | 50                             | 328.67             | -34.27                              | 364.07                         | 329.80                           |                               |
| 217              | 1974 | Meng Peiliang                     | 2               | middle-class peasant     | 34                    | 4                      | 3                     | 1                       | 9                              |                           | 1                         | 8                              | 88                                     |                           |                                  |                        | 1198                                 |                                      |                                         |                                 | 110                                                   | 88                                       | 35                         | 3080                                          | 1088                                           | 1.05                      | 1142                                         |                     | 4222                                         | 469.1555556                        |                                   | 820                                     | 1088                                           | 1.04                     | 1131.52                        |                                | 1298.39            | -166.87                             | 950.16                         | 783.29                           |                               |
| 218              | 1974 | Meng Mingcheng                    | 2               | middle-class peasant     | 22                    | 3                      | 2                     | 1                       | 4                              |                           |                           | 4                              | 40                                     |                           |                                  |                        | 939                                  |                                      |                                         |                                 | 55                                                    | 40                                       | 35                         | 1400                                          | 884                                            | 1.05                      | 928                                          | 18                  | 2346                                         | 559                                |                                   | 410                                     | 884                                            | 1.04                     | 919.36                         |                                | 705.62             | 213.74                              | 669.65                         | 883.39                           |                               |
| 219              | 1974 | Wu Shi'en                         | 1               | poor peasant             | 24                    | 4                      | 2                     | 2                       | 6                              | 1                         | 1                         | 4                              | 54                                     |                           |                                  |                        | 599                                  |                                      |                                         |                                 | 60                                                    | 54                                       | 35                         | 1890                                          | 539                                            | 1.20                      | 647                                          |                     | 2537                                         | 422.8                              |                                   | 492                                     | 539                                            | 1.1                      | 592.90                         |                                | 563.37             | 29.53                               | -29.05                         | 0.48                             |                               |
| 220              | 1974 | Wang Qingwen                      | 1               | poor peasant             | 12                    | 2                      | 1                     | 1                       | 4                              |                           |                           | 4                              | 40                                     |                           |                                  |                        | 815                                  |                                      |                                         |                                 | 30                                                    | 40                                       | 35                         | 1400                                          | 785                                            | 1.20                      | 942                                          |                     | 2342                                         | 585.5                              |                                   | 410                                     | 785                                            | 1.1                      | 863.50                         |                                | 729.15             | 134.35                              | 580.91                         | 715.26                           |                               |
| 221              | 1974 | Ji Chunmei                        | 1               | poor peasant             |                       | 0                      |                       |                         | 0                              |                           |                           |                                | 0                                      |                           |                                  |                        |                                      |                                      |                                         |                                 |                                                       | 0                                        | 35                         | 0                                             | 0                                              | 1.20                      | 0                                            |                     | 0                                            | #DIV/o!                            |                                   | 0                                       | 0                                              | 1.1                      | 0.00                           |                                | 0.00               | -296.75                             | -296.75                        |                                  |                               |
| 222              | 1974 | Li Yushu                          | 1               | poor peasant             | 8                     | 1                      | 1                     | 0                       | 3                              |                           |                           | 3                              | 30                                     |                           |                                  |                        | 629                                  |                                      |                                         |                                 | 20                                                    | 30                                       | 35                         | 1050                                          | 609                                            | 1.20                      | 731                                          |                     | 1781                                         | 593.6                              |                                   | 246                                     | 609                                            | 1.1                      | 669.90                         |                                | 566.65             | 103.25                              | 582.54                         | 685.79                           |                               |
| 223              | 1974 | Yu Zhenji                         | 2               | poor peasant             | 10                    | 1                      | 1                     | 0                       | 1                              |                           |                           | 1                              | 10                                     |                           |                                  |                        | 324                                  |                                      |                                         |                                 | 25                                                    | 10                                       | 35                         | 350                                           | 299                                            | 1.05                      | 314                                          | 18                  | 682                                          | 681.95                             |                                   | 82                                      | 299                                            | 1.04                     | 310.96                         |                                | 258.82             | 52.14                               | 225.73                         | 277.87                           |                               |
| 224              | 1974 | Meng Jinxu                        | 0               | poor peasant             |                       | 0                      |                       |                         | 0                              |                           |                           |                                | 0                                      |                           |                                  |                        |                                      |                                      |                                         |                                 |                                                       | 0                                        | 35                         | 0                                             | 0                                              | 1.20                      | 0                                            |                     | 0                                            | #DIV/o!                            |                                   | 0                                       | 0                                              |                          | 0.00                           |                                | 0.00               |                                     | 0.00                           |                                  |                               |
| 225              | 1974 | Li Guangkai                       | 1               | poor peasant             |                       | 0                      |                       |                         | 1                              |                           |                           | 1                              | 10                                     |                           |                                  |                        | 14                                   |                                      |                                         |                                 |                                                       | 10                                       | 35                         | 350                                           | 14                                             | 1.20                      | 17                                           |                     | 367                                          | 366.8                              |                                   | 82                                      | 14                                             | 1.1                      | 15.40                          |                                | 102.26             | -86.86                              | 4.06                           | -82.80                           |                               |
| 226              | 1974 | Liu Jigeng                        | 2               | poor peasant             | 12.5                  | 2                      | 1                     | 1                       | 5                              |                           |                           |                                | 50                                     |                           |                                  |                        | 663                                  |                                      |                                         |                                 | 31                                                    | 50                                       | 35                         | 1750                                          | 632                                            | 1.05                      | 664                                          |                     | 2414                                         | 482.72                             |                                   | 492                                     | 632                                            | 1.04                     | 657.28                         |                                | 835.26             | -177.98                             | 613.48                         | 435.50                           |                               |
| 227              | 1974 | Fan Shuzhi                        | 1               | middle-class peasant     | 14                    | 2                      | 1                     | 1                       | 7                              | 1                         | 2                         | 4                              | 62                                     |                           |                                  |                        | 441                                  |                                      |                                         |                                 | 35                                                    | 62                                       | 35                         | 2170                                          | 406                                            | 1.20                      | 487                                          |                     | 2657                                         | 379.6                              |                                   | 492                                     | 406                                            | 1.1                      | 446.60                         |                                | 578.65             | -132.05                             | -378.67                        | -510.72                          |                               |
| 228              | 1974 | Ji Guanglian                      | 1               | low-middle-class peasant | 4                     | 1                      | 0                     | 1                       | 5                              | 1                         | 1                         | 3                              | 44                                     |                           |                                  |                        | 21                                   |                                      |                                         |                                 | 10                                                    | 44                                       | 35                         | 1465                                          | 11                                             | 1.20                      | 13                                           |                     | 1478                                         | 295.64                             |                                   | 328                                     | 11                                             | 1.1                      | 12.10                          | 210                            | 271.02             | -48.92                              | 3.78                           | -45.14                           |                               |
| 229              | 1974 | Yang Xiaozhong                    | 1               | low-middle-class peasant | 14                    | 2                      | 1                     | 1                       | 4                              | 1                         | 1                         | 2                              | 34                                     |                           |                                  |                        | 583                                  |                                      |                                         |                                 | 35                                                    | 34                                       | 35                         | 1190                                          | 548                                            | 1.20                      | 658                                          | 18                  | 1866                                         | 466.4                              |                                   | 328                                     | 548                                            | 1.1                      | 602.80                         |                                | 487.61             | 115.19                              | 320.00                         | 435.19                           |                               |
| 230              | 1974 | Meng Minghong                     | 2               | middle-class peasant     | 14                    | 2                      | 1                     | 1                       | 5                              | 2                         | 1                         | 2                              | 40                                     |                           |                                  |                        | 473                                  |                                      |                                         |                                 | 35                                                    | 40                                       | 35                         | 1332                                          | 438                                            | 1.05                      | 460                                          | 18                  | 1810                                         | 361.98                             |                                   | 410                                     | 438                                            | 1.04                     | 455.52                         |                                | 569.40             | -113.88                             | 334.54                         | 220.66                           |                               |

(cont.)

| Household number | Year | Name of the head of the household | Production team | Class status (1)         | Basic work points (2) | Total labor forces (3) | Male labor forces (4) | Female labor forces (5) | Total household population (6) | Age: 1 to 3 years old (7) | Age: 4 to 7 years old (8) | Age: 8 years old and above (9) | Work points of grain distribution (10) | Laboring work points (11) | Farmyard manure work points (12) | Total work points (13) | Work points of compulsory labor (14) | Work points of help cultivation (15) | Work points of private plots labor (16) | Total deducted work points (17) | Actual workdays of participation in distribution (18) | Workpoints for rations distribution (19) | Rations per workpoint (20) | Total rations received from distribution (21) | Workdays of participation in distribution (22) | Grains per workpoint (23) | Total grains distributed by work-points (24) | Grains subsidy (25) | Total Grains received from distribution (26) | Distributed grains per person (27) | Distributed grains per adult (28) | Grains received from private plots (29) | Workdays of participation in distribution (30) | Value per workpoint (31) | Total value of workpoints (32) | Money used for investment (33) | Sum of income (34) | Money distributed in this year (34) | Deposit/ debt of this year (35) | Deposit/ debt over the years (36) | Accumulated deposit/debt (37) |        |
|------------------|------|-----------------------------------|-----------------|--------------------------|-----------------------|------------------------|-----------------------|-------------------------|--------------------------------|---------------------------|---------------------------|--------------------------------|----------------------------------------|---------------------------|----------------------------------|------------------------|--------------------------------------|--------------------------------------|-----------------------------------------|---------------------------------|-------------------------------------------------------|------------------------------------------|----------------------------|-----------------------------------------------|------------------------------------------------|---------------------------|----------------------------------------------|---------------------|----------------------------------------------|------------------------------------|-----------------------------------|-----------------------------------------|------------------------------------------------|--------------------------|--------------------------------|--------------------------------|--------------------|-------------------------------------|---------------------------------|-----------------------------------|-------------------------------|--------|
| 231              | 1974 | Zhang Xuewen                      | 0               | poor peasant             |                       | 0                      |                       |                         | 0                              |                           |                           |                                | 0                                      |                           |                                  |                        |                                      |                                      |                                         |                                 | 0                                                     | 35                                       | 0                          | 0                                             | 1.20                                           | 0                         |                                              | 0                   | #DIV/o!                                      |                                    | 0                                 | 0                                       |                                                | 0.00                     |                                |                                | 0.00               |                                     | 0.00                            |                                   | 0.00                          |        |
| 232              | 1974 | Wu Jingxiu                        | 0               | middle-class peasant     |                       | 0                      |                       |                         | 0                              |                           |                           |                                | 0                                      |                           |                                  |                        |                                      |                                      |                                         |                                 | 0                                                     | 35                                       | 0                          | 0                                             | 1.20                                           | 0                         |                                              | 0                   | #DIV/o!                                      |                                    | 0                                 | 0                                       |                                                | 0.00                     |                                |                                | 0.00               |                                     | 0.00                            |                                   | 0.00                          |        |
| 233              | 1974 | Fan Shugen                        | 1               | middle-class peasant     | 14                    | 2                      | 1                     | 1                       | 4                              | 1                         | 1                         | 2                              | 34                                     |                           |                                  |                        | 664                                  |                                      |                                         |                                 | 35                                                    |                                          | 34                         | 35                                            | 1110                                           | 629                       | 1.20                                         | 755                 | 18                                           | 1883                               | 470.7                             |                                         | 246                                            | 629                      | 1.1                            | 691.90                         |                    | 514.36                              | 177.54                          | 441.83                            | 619.37                        |        |
| 234              | 1974 | Yang Xiaoheng                     | 1               |                          |                       | 0                      |                       |                         | 0                              |                           |                           |                                | 0                                      |                           |                                  |                        |                                      |                                      |                                         |                                 | 0                                                     | 35                                       | 0                          | 0                                             | 1.20                                           | 0                         |                                              | 0                   | #DIV/o!                                      |                                    | 0                                 | 0                                       |                                                | 1.1                      | 0.00                           |                                |                    | 0.00                                |                                 | 0.00                              |                               |        |
| 235              | 1974 | Fan Xuewen                        | 1               |                          |                       | 0                      |                       |                         | 0                              |                           |                           |                                | 0                                      |                           |                                  |                        |                                      |                                      |                                         |                                 | 0                                                     | 35                                       | 0                          | 0                                             | 1.20                                           | 0                         |                                              | 0                   | #DIV/o!                                      |                                    | 0                                 | 0                                       |                                                | 1.1                      | 0.00                           |                                |                    | 0.00                                |                                 | 0.00                              |                               |        |
| 236              | 1974 | Liu Yuzhen                        | 1               |                          |                       | 0                      |                       |                         | 1                              |                           |                           | 1                              | 10                                     |                           |                                  |                        |                                      |                                      |                                         |                                 | 10                                                    | 35                                       | 350                        | 0                                             | 1.20                                           | 0                         |                                              | 350                 |                                              |                                    | 82                                | 0                                       |                                                |                          |                                |                                | 55.93              | -55.93                              | -42.18                          | -98.11                            |                               |        |
| 237              | 1974 | Mu Chuncui                        | 1               | poor peasant             |                       | 0                      |                       |                         | 1                              |                           |                           | 1                              | 10                                     |                           |                                  |                        | 488                                  |                                      |                                         |                                 | 10                                                    | 35                                       | 350                        | 488                                           | 1.05                                           | 512                       |                                              | 862                 | 862.4                                        |                                    | 82                                | 488                                     | 1.04                                           | 507.52                   |                                | 282.30                         | 225.22             | 430.41                              | 655.63                          |                                   |                               |        |
| 238              | 1974 | Meng Mingliang                    | 2               | poor peasant             | 2.5                   | 1                      | 0                     | 1                       | 1                              |                           |                           | 1                              | 10                                     |                           |                                  |                        | 216                                  |                                      |                                         |                                 | 6                                                     | 10                                       | 35                         | 350                                           | 210                                            | 1.20                      | 252                                          |                     | 602                                          | 602                                |                                   | 82                                      | 210                                            | 1.1                      | 231.00                         |                                | 181.48             | 49.52                               | 161.03                          | 210.55                            |                               |        |
| 239              | 1974 | Wang Guilan                       | 1               | poor peasant             | 14                    | 2                      | 1                     | 1                       | 6                              | 1                         | 1                         | 4                              | 54                                     |                           |                                  |                        | 560                                  |                                      |                                         |                                 | 35                                                    |                                          | 54                         | 35                                            | 1890                                           | 525                       | 1.20                                         | 630                 |                                              | 2520                               | 420                               |                                         | 410                                            | 525                      | 1.1                            | 577.50                         |                    | 527.64                              | 49.86                           | -201.25                           | -151.39                       |        |
| 240              | 1974 | Wang Chuanxian                    | 1               | poor peasant             |                       | 0                      |                       |                         | 3                              |                           |                           | 3                              | 30                                     |                           |                                  |                        | 390                                  |                                      |                                         |                                 | 30                                                    | 35                                       | 1050                       | 390                                           | 1.20                                           | 468                       |                                              | 1518                | 506                                          |                                    | 246                               | 390                                     | 1.1                                            | 429.00                   |                                | 511.11                         | -82.11             | 203.81                              | 121.70                          |                                   |                               |        |
| 241              | 1974 | Wang Zhenquan                     | 1               | poor peasant             |                       | 0                      |                       |                         | 0                              |                           |                           |                                | 0                                      |                           |                                  |                        |                                      |                                      |                                         |                                 | 0                                                     | 35                                       | 0                          | 0                                             | 1.20                                           | 0                         |                                              | 0                   | #DIV/o!                                      |                                    | 0                                 | 0                                       |                                                | 1.1                      | 0.00                           |                                |                    | 0.00                                |                                 | 0.00                              |                               |        |
| 243              | 1974 | Li Xuying                         | 1               | poor peasant             |                       | 0                      |                       |                         | 0                              |                           |                           |                                | 0                                      |                           |                                  |                        |                                      |                                      |                                         |                                 | 0                                                     | 35                                       | 0                          | 0                                             | 1.20                                           | 0                         |                                              | 0                   | #DIV/o!                                      |                                    | 0                                 | 0                                       |                                                | 1.1                      | 0.00                           |                                |                    | 0.00                                |                                 | 0.00                              |                               |        |
| 244              | 1974 | Meng Jingxi                       | 1               | poor peasant             |                       | 0                      |                       |                         | 0                              |                           |                           |                                | 0                                      |                           |                                  |                        |                                      |                                      |                                         |                                 | 0                                                     | 35                                       | 0                          | 0                                             | 1.20                                           | 0                         |                                              | 0                   | #DIV/o!                                      |                                    | 0                                 | 0                                       |                                                | 1.1                      | 0.00                           |                                |                    | 0.00                                |                                 | 0.00                              |                               |        |
| 245              | 1974 | Cao Jinren                        | 1               | poor peasant             | 10                    | 1                      | 1                     | 0                       | 1                              |                           |                           | 1                              | 10                                     |                           |                                  |                        | 373                                  |                                      |                                         |                                 | 25                                                    | 10                                       | 35                         | 350                                           | 348                                            | 1.20                      | 418                                          |                     | 768                                          | 767.6                              |                                   | 82                                      | 348                                            | 1.1                      | 382.80                         |                                |                    | 382.80                              |                                 | 382.80                            |                               |        |
| 247              | 1974 | Wu Jinggui                        | 1               | poor peasant             |                       | 0                      |                       |                         | 0                              |                           |                           |                                | 0                                      |                           |                                  |                        |                                      |                                      |                                         |                                 | 0                                                     | 35                                       | 0                          | 0                                             | 1.20                                           | 0                         |                                              | 0                   | #DIV/o!                                      |                                    | 0                                 | 0                                       |                                                | 1.1                      | 0.00                           |                                |                    | 0.00                                |                                 | 0.00                              |                               |        |
| 248              | 1974 | Zhang Yucang                      | 1               |                          | 10.5                  | 3                      | 0                     | 3                       | 3                              |                           |                           | 3                              | 30                                     |                           |                                  |                        | 379                                  |                                      |                                         |                                 | 26                                                    | 30                                       | 35                         | 1050                                          | 353                                            | 1.05                      | 371                                          |                     | 1421                                         | 455                                |                                   | 246                                     | 353                                            | 1.04                     | 367.12                         |                                | 412.62             | -45.50                              | 164.55                          | 119.05                            |                               |        |
| 249              | 1974 | Zhang Lirong                      | 2               | poor peasant             | 14                    | 2                      | 1                     | 1                       | 4                              | 1                         | 1                         | 2                              | 34                                     |                           |                                  |                        | 493                                  |                                      |                                         |                                 | 35                                                    |                                          | 34                         | 35                                            | 1190                                           | 458                       | 1.05                                         | 481                 |                                              | 1671                               | 417.725                           |                                         | 328                                            | 458                      | 1.04                           | 476.32                         |                    | 435.80                              | 40.52                           | 206.01                            | 246.53                        |        |
| 250              | 1974 | Zhang Liwen                       | 2               | poor peasant             | 14                    | 2                      | 1                     | 1                       | 4                              | 2                         |                           | 2                              | 32                                     |                           |                                  |                        | 579                                  |                                      |                                         |                                 | 35                                                    |                                          | 32                         | 35                                            | 1069                                           | 544                       | 1.05                                         | 571                 | 18                                           | 1658                               | 414.55                            |                                         | 164                                            | 544                      | 1.04                           | 565.76                         |                    | 668.96                              | -103.20                         | 444.92                            | 341.72                        |        |
| 251              | 1974 | Liu Ning                          | 2               |                          | 4                     | 1                      | 0                     | 1                       | 2                              |                           | 1                         | 1                              | 18                                     |                           |                                  |                        |                                      |                                      |                                         |                                 | 18                                                    | 35                                       | 630                        | 0                                             | 1.05                                           | 0                         |                                              | 630                 | 315                                          |                                    | 164                               | 0                                       | 1.04                                           | 0.00                     | 100                            |                                | 102.44             | -2.44                               | -126.56                         | -129.00                           |                               |        |
| 252              | 1974 | Niu Lanmei                        | 2               | poor peasant             | 32                    | 4                      | 3                     | 1                       | 6                              | 1                         |                           | 5                              | 56                                     |                           |                                  |                        | 1101                                 |                                      |                                         |                                 | 80                                                    |                                          | 56                         | 35                                            | 1875                                           | 1021                      | 1.05                                         | 1072                |                                              | 2947                               | 491.175                           |                                         | 492                                            | 1021                     | 1.04                           | 1061.84                        |                    | 1052.41                             | 9.43                            | 1389.46                           | 1398.89                       |        |
| 253              | 1974 | Meng Minglu                       | 2               | low-middle-class peasant |                       | 0                      |                       |                         | 0                              |                           |                           |                                | 0                                      |                           |                                  |                        |                                      |                                      |                                         |                                 | 0                                                     | 35                                       | 0                          | 0                                             | 1.05                                           | 0                         |                                              | 0                   | #DIV/o!                                      |                                    | 0                                 | 0                                       |                                                | 1.04                     | 0.00                           |                                |                    | 0.00                                |                                 | 0.00                              |                               |        |
| 256              | 1974 | Cui Yongfu                        | 2               | poor peasant             |                       | 0                      |                       |                         | 0                              |                           |                           |                                | 0                                      |                           |                                  |                        |                                      |                                      |                                         |                                 | 0                                                     | 35                                       | 0                          | 0                                             | 1.20                                           | 0                         |                                              | 0                   | #DIV/o!                                      |                                    | 0                                 | 0                                       |                                                |                          |                                |                                | 13.63              | -13.63                              | -33.45                          | -47.08                            |                               |        |
| 257              | 1974 | An Guobao                         | 1               | teacher                  |                       | 0                      |                       |                         | 0                              |                           |                           |                                | 0                                      |                           |                                  |                        |                                      |                                      |                                         |                                 | 0                                                     | 35                                       | 0                          | 0                                             | 1.20                                           | 0                         |                                              | 0                   | #DIV/o!                                      |                                    | 0                                 | 0                                       |                                                |                          |                                |                                | 0.00               |                                     | 0.00                            | -38.52                            | -38.52                        |        |
| 258              | 1974 | Liang Guangsheng                  |                 | teacher                  |                       | 0                      |                       |                         | 0                              |                           |                           |                                | 0                                      |                           |                                  |                        |                                      |                                      |                                         |                                 | 0                                                     | 35                                       | 0                          | 0                                             | 1.20                                           | 0                         |                                              | 0                   | #DIV/o!                                      |                                    | 0                                 | 0                                       |                                                |                          |                                |                                | 0.00               |                                     | 0.00                            |                                   | 0.00                          |        |
| 259              | 1974 | Liu Jinlian                       |                 | teacher                  |                       | 0                      |                       |                         | 0                              |                           |                           |                                | 0                                      |                           |                                  |                        |                                      |                                      |                                         |                                 | 0                                                     | 35                                       | 0                          | 0                                             | 1.20                                           | 0                         |                                              | 0                   | #DIV/o!                                      |                                    | 0                                 | 0                                       |                                                |                          |                                |                                | 0.00               |                                     | 0.00                            | -0.61                             | -0.61                         |        |
| 260              | 1974 | Liu Xuexu                         |                 | cadre                    |                       | 0                      |                       |                         | 0                              |                           |                           |                                | 0                                      |                           |                                  |                        |                                      |                                      |                                         |                                 | 0                                                     | 35                                       | 0                          | 0                                             | 1.20                                           | 0                         |                                              | 0                   | #DIV/o!                                      |                                    | 0                                 | 0                                       |                                                |                          |                                |                                | 0.00               |                                     | 0.00                            | -4.45                             | -4.45                         |        |
| 261              | 1974 | Huang Qingxiang                   |                 | teacher                  |                       | 0                      |                       |                         | 0                              |                           |                           |                                | 0                                      |                           |                                  |                        |                                      |                                      |                                         |                                 | 0                                                     | 35                                       | 0                          | 0                                             | 1.20                                           | 0                         |                                              | 0                   | #DIV/o!                                      |                                    | 0                                 | 0                                       |                                                |                          |                                |                                | 0.00               |                                     | 0.00                            | -9.40                             | -9.40                         |        |
| 262              | 1974 | Han Junxiu                        |                 | cadre                    |                       | 0                      |                       |                         | 0                              |                           |                           |                                | 0                                      |                           |                                  |                        |                                      |                                      |                                         |                                 | 0                                                     | 35                                       | 0                          | 0                                             | 1.20                                           | 0                         |                                              | 0                   | #DIV/o!                                      |                                    | 0                                 | 0                                       |                                                |                          |                                |                                | 0.00               | 14.09                               | 5.06                            | 9.03                              | -14.09                        | -5.06  |
| 263              | 1974 | Li Yonggong                       |                 | cadre                    |                       | 0                      |                       |                         | 0                              |                           |                           |                                | 0                                      |                           |                                  |                        |                                      |                                      |                                         |                                 | 0                                                     | 35                                       | 0                          | 0                                             | 1.20                                           | 0                         |                                              | 0                   | #DIV/o!                                      |                                    | 0                                 | 0                                       |                                                |                          |                                |                                | 0.00               |                                     | 9.64                            | -9.64                             | -19.04                        | -28.68 |

(cont.)

| Household number | Year | Name of the head of the household | Production team | Class status (1)     | Basic work points (2) | Total labor forces (3) | Male labor forces (4) | Female labor forces (5) | Total household population (6) | Age: 1 to 3 years old (7) | Age: 4 to 7 years old (8) | Age: 8 years old and above (9) | Work points of grain distribution (10) | Laboring work points (11) | Farmyard work points (12) | Total work points (13) | Work points of compulsory labor (14) | Work points of help cultivation (15) | Work points of private plots labor (16) | Total deducted work points (17) | Actual workdays of participation in distribution (18) | Workpoints for rations distribution (19) | Rations per workpoint (20) | Total rations received from distribution (21) | Workdays of participation in distribution (22) | Grains per workpoint (23) | Total grains distributed by work-points (24) | Grains subsidy (25) | Total Grains received from distribution (26) | Distributed grains per person (27) | Distributed grains per adult (28) | Grains received from private plots (29) | Workdays of participation in distribution (30) | Value per workpoint (31) | Total value of workpoints (32) | Money used for investment (33) | Sum of income (34) | Money distributed in this year (34) | Deposit/debt of this year (35) | Deposit/debt over the years (36) | Accumulated deposit/debt (37) |
|------------------|------|-----------------------------------|-----------------|----------------------|-----------------------|------------------------|-----------------------|-------------------------|--------------------------------|---------------------------|---------------------------|--------------------------------|----------------------------------------|---------------------------|---------------------------|------------------------|--------------------------------------|--------------------------------------|-----------------------------------------|---------------------------------|-------------------------------------------------------|------------------------------------------|----------------------------|-----------------------------------------------|------------------------------------------------|---------------------------|----------------------------------------------|---------------------|----------------------------------------------|------------------------------------|-----------------------------------|-----------------------------------------|------------------------------------------------|--------------------------|--------------------------------|--------------------------------|--------------------|-------------------------------------|--------------------------------|----------------------------------|-------------------------------|
| 264              | 1974 | Ge Changliang                     |                 | teacher              | 14                    | 2                      | 1                     | 1                       | 2                              |                           |                           | 2                              | 20                                     |                           |                           |                        | 668                                  |                                      |                                         |                                 | 35                                                    | 20                                       | 35                         | 700                                           | 633                                            | 1.20                      | 760                                          |                     | 1460                                         | 729.8                              |                                   | 82                                      | 633                                            | 1.1                      | 696.30                         |                                |                    | 365.18                              | 331.12                         |                                  | 331.12                        |
| 265              | 1974 | Liu Baochang                      | 1               | poor peasant         | 14                    | 2                      | 1                     | 1                       | 2                              |                           |                           | 2                              | 20                                     |                           |                           |                        | 395                                  |                                      |                                         |                                 | 35                                                    | 20                                       | 35                         | 700                                           | 360                                            | 1.20                      | 432                                          |                     | 1132                                         | 893                                |                                   | 164                                     | 360                                            | 1.1                      | 396.00                         | 21.13                          |                    | 256.38                              | 160.75                         |                                  | 160.75                        |
| 266              | 1974 | Wang Wenkui                       | 1               | cadre                | 14                    | 2                      | 1                     | 1                       | 4                              | 1                         | 1                         | 2                              | 34                                     |                           |                           |                        | 532                                  |                                      |                                         |                                 | 35                                                    | 34                                       | 35                         | 1190                                          | 497                                            | 1.20                      | 596                                          |                     | 1786                                         | 446.6                              |                                   | 246                                     | 497                                            | 1.1                      | 546.70                         |                                |                    | 395.70                              | 151.00                         |                                  | 151.00                        |
| 267              | 1974 | Zhao Pingfen                      | 1               | poor peasant         | 14                    | 2                      | 1                     | 1                       | 2                              |                           |                           | 2                              | 20                                     |                           |                           |                        | 503                                  |                                      |                                         |                                 | 35                                                    | 20                                       | 35                         | 700                                           | 468                                            | 1.20                      | 562                                          | 18                  | 1280                                         | 639.8                              |                                   | 82                                      | 468                                            | 1.1                      | 514.80                         |                                |                    | 217.99                              | 296.81                         |                                  | 296.81                        |
| 268              | 1974 | Gao Peiseng                       | 1               | poor peasant         | 14                    | 2                      | 1                     | 1                       | 3                              | 1                         |                           | 2                              | 26                                     |                           |                           |                        | 517                                  |                                      |                                         |                                 | 35                                                    | 26                                       | 35                         | 910                                           | 482                                            | 1.20                      | 578                                          | 18                  | 1506                                         | 502.1333333                        |                                   | 164                                     | 482                                            | 1.1                      | 530.20                         |                                |                    | 324.96                              | 205.24                         |                                  | 205.24                        |
| 269              | 1974 | Gao Peilin                        | 1               | poor peasant         | 4                     | 1                      | 0                     | 1                       | 4                              | 1                         | 1                         | 2                              | 34                                     |                           |                           |                        | 196                                  |                                      |                                         |                                 | 10                                                    | 34                                       | 35                         | 1190                                          | 186                                            | 1.20                      | 223                                          |                     | 1413                                         | 353.3                              |                                   | 246                                     | 186                                            | 1.1                      | 204.60                         | 71.93                          |                    | 299.54                              | -23.01                         |                                  | -23.01                        |
| 270              | 1974 | Meng Fangli                       | 1               | middle-class peasant | 4                     | 1                      | 0                     | 1                       | 3                              | 2                         |                           | 1                              | 22                                     |                           |                           |                        | 83                                   |                                      |                                         |                                 | 10                                                    | 22                                       | 35                         | 685                                           | 73                                             | 1.20                      | 88                                           |                     | 773                                          | 257.5333333                        |                                   | 246                                     | 73                                             | 1.1                      | 80.30                          | 70                             |                    | 151.11                              | -0.81                          |                                  | -0.81                         |
| 271              | 1974 | Lan Weiyong                       | 1               | poor peasant         | 14                    | 2                      | 1                     | 1                       | 4                              | 2                         |                           | 2                              | 32                                     |                           |                           |                        | 467                                  |                                      |                                         |                                 | 35                                                    | 32                                       | 35                         | 1035                                          | 432                                            | 1.20                      | 518                                          |                     | 1553                                         | 388.35                             |                                   | 164                                     | 432                                            | 1.1                      | 475.20                         |                                |                    | 265.52                              | 209.68                         |                                  | 209.68                        |
| 272              | 1974 | Meng Tianyu                       | 1               | poor peasant         | 4                     | 1                      | 0                     | 1                       | 1                              |                           |                           | 1                              | 10                                     |                           |                           |                        |                                      |                                      |                                         |                                 | 10                                                    | 35                                       | 350                        | 0                                             | 1.20                                           | 0                         |                                              | 350                 |                                              | 350                                | 350                               |                                         | 0                                              | 1.1                      | 0.00                           | 13.34                          |                    | 36.45                               | -23.11                         |                                  | -23.11                        |
| 273              | 1974 | Wang Yongmei                      | 1               | teacher              |                       | 0                      |                       |                         | 1                              |                           |                           | 1                              | 10                                     |                           |                           |                        |                                      |                                      |                                         |                                 | 10                                                    | 35                                       | 350                        | 0                                             | 1.20                                           | 0                         |                                              | 350                 |                                              | 350                                |                                   | 82                                      | 0                                              | 1.1                      | 0.00                           |                                |                    | 2.76                                | -2.76                          |                                  | -2.76                         |
| 274              | 1974 | Wang Chuanding                    | 2               | teacher              | 14                    | 2                      | 1                     | 1                       | 2                              |                           |                           | 2                              | 20                                     |                           |                           |                        | 487                                  |                                      |                                         |                                 | 35                                                    | 20                                       | 35                         | 700                                           | 452                                            | 1.20                      | 474                                          |                     | 1174                                         | 587                                |                                   | 82                                      | 452                                            | 1.04                     | 470.08                         |                                |                    | 369.82                              | 100.26                         |                                  | 100.26                        |
| 276              | 1974 | Cui Yili                          | 2               | poor peasant         | 4                     | 1                      | 0                     | 1                       | 3                              | 1                         | 1                         | 1                              | 24                                     |                           |                           |                        | 202                                  |                                      |                                         |                                 | 10                                                    | 24                                       | 35                         | 840                                           | 192                                            | 1.20                      | 201                                          |                     | 1041                                         | 347                                |                                   | 164                                     | 192                                            | 1.04                     | 199.68                         | 100                            |                    | 203.77                              | 95.91                          |                                  | 95.91                         |
| 277              | 1974 | Liu Xiangting                     | 2               | poor peasant         | 14                    | 2                      | 1                     | 1                       | 2                              |                           |                           | 2                              | 20                                     |                           |                           |                        | 361                                  |                                      |                                         |                                 | 35                                                    | 20                                       | 35                         | 700                                           | 326                                            | 1.20                      | 342                                          | 18                  | 1060                                         | 530                                |                                   | 82                                      | 326                                            | 1.04                     | 339.04                         | 70                             |                    | 277.14                              | 131.90                         |                                  | 131.90                        |
| 278              | 1974 | Meng Hulin                        | 2               | poor peasant         | 4                     | 1                      | 0                     | 1                       | 2                              |                           | 1                         | 1                              | 18                                     |                           |                           |                        | 39                                   |                                      |                                         |                                 | 10                                                    | 18                                       | 35                         | 630                                           | 29                                             | 1.20                      | 35                                           |                     | 665                                          | 332.4                              |                                   | 246                                     | 29                                             | 1.04                     | 30.16                          | 200                            |                    | 157.83                              | 72.33                          |                                  | 72.33                         |
| 279              | 1974 | Gui Haigeng                       | 1               | poor peasant         | 14                    | 2                      | 1                     | 1                       | 2                              |                           |                           | 2                              | 20                                     |                           |                           |                        | 497                                  |                                      |                                         |                                 | 35                                                    | 20                                       | 35                         | 700                                           | 462                                            | 1.20                      | 485                                          |                     | 1185                                         | 592.5                              |                                   | 164                                     | 462                                            | 1.04                     | 480.48                         |                                |                    | 309.57                              | 170.91                         |                                  | 170.91                        |
| 280              | 1974 | Meng Tianfu                       | 2               | poor peasant         |                       |                        |                       |                         |                                |                           |                           |                                |                                        |                           |                           |                        |                                      |                                      |                                         |                                 |                                                       |                                          |                            |                                               |                                                |                           |                                              |                     |                                              |                                    |                                   |                                         |                                                |                          |                                |                                |                    |                                     |                                |                                  |                               |
| 1                | 1975 | Meng Tianyun                      | 2               | poor peasant         | 6.5                   | 2                      | 0                     | 2                       | 7                              |                           | 2                         | 5                              | 66                                     |                           |                           |                        | 564                                  |                                      |                                         |                                 | 16                                                    | 66                                       | 39.6                       | 2614                                          | 548                                            | 0.77                      | 442                                          |                     | 3056                                         |                                    |                                   | 768                                     | 548                                            | 1.03                     | 564.44                         | 0.05                           |                    | 618.76                              | -54.27                         | 175.99                           | 121.72                        |
| 2                | 1975 | Yang Fengming                     | 1               | middle-class peasant | 10.5                  | 2                      | 1                     | 1                       | 2                              |                           |                           | 2                              | 20                                     |                           |                           |                        | 285                                  |                                      |                                         |                                 | 26                                                    | 20                                       | 39.6                       | 792                                           | 259                                            | 0.57                      | 148                                          |                     | 940                                          |                                    |                                   | 192                                     | 259                                            | 1.01                     | 261.59                         |                                |                    | 241.07                              | 20.52                          | 157.65                           | 178.17                        |
| 3                | 1975 | Li Chengxin                       | 1               | poor peasant         | 33                    | 5                      | 3                     | 2                       | 8                              |                           |                           | 8                              | 80                                     |                           |                           |                        | 1369                                 |                                      |                                         |                                 | 90                                                    | 80                                       | 39.6                       | 3201                                          | 1279                                           | 0.57                      | 729                                          |                     | 3930                                         |                                    |                                   | 768                                     | 1279                                           | 1.01                     | 1291.79                        | 0.15                           |                    | 1058.49                             | 233.45                         | -13.97                           | 219.48                        |
| 4                | 1975 | Li Zeying                         | 1               | poor peasant         |                       | 0                      |                       |                         | 0                              |                           |                           |                                | 0                                      |                           |                           |                        |                                      |                                      |                                         |                                 | 0                                                     | 39.6                                     | 0                          | 0                                             | 0.57                                           | 0                         |                                              | 0                   |                                              | 0                                  |                                   | 0                                       | 1.01                                           | 0.00                     |                                |                                | 0.00               |                                     | 0.00                           |                                  |                               |
| 5                | 1975 | Gao Peizhong                      | 1               | poor peasant         | 22                    | 3                      | 2                     | 1                       | 8                              | 1                         | 1                         | 6                              | 74                                     |                           |                           |                        | 566                                  |                                      |                                         |                                 | 55                                                    | 74                                       | 39.6                       | 2930                                          | 511                                            | 0.57                      | 291                                          | 30                  | 3252                                         |                                    |                                   | 768                                     | 511                                            | 1.01                     | 516.11                         | 100.00                         |                    | 676.75                              | -60.64                         | -1116.21                         | -1176.85                      |
| 6                | 1975 | Kong Qingquan                     | 1               | poor peasant         | 18                    | 3                      | 1                     | 2                       | 5                              |                           |                           | 5                              | 50                                     |                           |                           |                        | 560                                  |                                      |                                         |                                 | 45                                                    | 50                                       | 39.6                       | 1980                                          | 515                                            | 0.57                      | 294                                          |                     | 2274                                         |                                    |                                   | 480                                     | 515                                            | 1.01                     | 520.15                         |                                |                    | 509.97                              | 10.18                          | 379.24                           | 389.42                        |
| 7                | 1975 | Li Chengren                       | 1               | middle-class peasant |                       | 0                      |                       |                         | 2                              |                           |                           | 2                              | 20                                     |                           |                           |                        | 21                                   |                                      |                                         |                                 | 20                                                    | 39.6                                     | 792                        | 21                                            | 0.57                                           | 12                        |                                              | 804                 |                                              |                                    | 192                               | 21                                      | 1.01                                           | 21.21                    | 190.00                         |                                | 145.34             | 65.87                               | -430.11                        | -364.24                          |                               |
| 8                | 1975 | Wu Jixiang                        | 1               | middle-class peasant | 12                    | 2                      | 1                     | 1                       | 6                              | 1                         | 1                         | 4                              | 54                                     |                           |                           |                        | 306                                  |                                      |                                         |                                 | 30                                                    | 54                                       | 39.6                       | 2138                                          | 276                                            | 0.57                      | 157                                          |                     | 2296                                         |                                    |                                   | 480                                     | 276                                            | 1.01                     | 278.76                         | 70.00                          |                    | 373.50                              | -24.74                         | 58.30                            | 33.56                         |
| 9                | 1975 | Kong Fangyu                       | 1               | poor peasant         | 4                     | 1                      | 0                     | 1                       | 3                              | 1                         | 1                         | 1                              | 24                                     |                           |                           |                        | 20                                   |                                      |                                         |                                 | 10                                                    | 24                                       | 39.6                       | 950                                           | 10                                             | 0.57                      | 6                                            |                     | 956                                          |                                    |                                   | 192                                     | 10                                             | 1.01                     | 10.10                          | 60.00                          |                    | 152.20                              | -82.10                         | 76.83                            | -5.27                         |
| 10               | 1975 | Gao Wei                           | 1               | poor peasant         | 20.5                  | 4                      | 1                     | 3                       | 5                              |                           |                           | 5                              | 50                                     |                           |                           |                        | 780                                  |                                      |                                         |                                 | 51                                                    | 50                                       | 39.6                       | 1881                                          | 729                                            | 0.57                      | 416                                          |                     | 2297                                         |                                    |                                   | 384                                     | 729                                            | 1.01                     | 736.29                         | 2.59                           |                    | 765.61                              | -26.73                         | 674.05                           | 647.32                        |
| 11               | 1975 | Gao Jun                           | 1               | poor peasant         |                       | 0                      |                       |                         | 1                              |                           |                           | 1                              | 10                                     |                           |                           |                        | 66                                   |                                      |                                         |                                 |                                                       | 10                                       | 39.6                       | 396                                           | 66                                             | 0.57                      | 38                                           |                     | 434                                          |                                    |                                   | 96                                      | 66                                             | 1.01                     | 66.66                          |                                |                    | 119.87                              | -53.21                         | 177.49                           | 124.28                        |
| 12               | 1975 | Gao Peixiao                       | 1               | poor peasant         | 14                    | 2                      | 1                     | 1                       | 6                              | 1                         | 1                         | 4                              | 54                                     |                           |                           |                        | 742                                  |                                      |                                         |                                 | 35                                                    | 54                                       | 39.6                       | 2138                                          | 707                                            | 0.57                      | 403                                          | 30                  | 2571                                         |                                    |                                   | 480                                     | 707                                            | 1.01                     | 714.07                         |                                |                    | 631.91                              | 82.16                          | 396.76                           | 478.92                        |

DATASET DONGBEILI-SHANXI

(cont.)

| Household number | Year | Name of the head of the household | Production team | Class status (1)         | Basic work points (2) | Total labor forces (3) | Male labor forces (4) | Female labor forces (5) | Total household population (6) | Age: 1 to 3 years old (7) | Age: 4 to 7 years old (8) | Age: 8 years old and above (9) | Work points of grain distribution (10) | Laboring work points (11) | Farmyard manure work points (12) | Total work points (13) | Work points of compulsory labor (14) | Work points of help cultivation (15) | Work points of private plots labor (16) | Total deducted work points (17) | Acutal workdays of participation in distribution (18) | Workpoints for rations distribution (19) | Rations per workpoint (20) | Total rations received form distribution (21) | Workdays of participation in distribu-tion (22) | Grains per workpoint (23) | Total grains distributed by work-points (24) | Grains subsidy (25) | Total Grains received from distribution (26) | Distributed grains per person (27) | Distributed grains per adult (28) | Grains received from privated plots (29) | Workdays of participation in distribution (30) | Value per workpoint (31) | Total value of workpoints (32) | Money used for investment (33) | Sum of income (34) | Money distributed in this year (34) | Deposit/ debt of this year (35) | Deposit/ debt over the years (36) | Accumulated deposit/debt (37) |
|------------------|------|-----------------------------------|-----------------|--------------------------|-----------------------|------------------------|-----------------------|-------------------------|--------------------------------|---------------------------|---------------------------|--------------------------------|----------------------------------------|---------------------------|----------------------------------|------------------------|--------------------------------------|--------------------------------------|-----------------------------------------|---------------------------------|-------------------------------------------------------|------------------------------------------|----------------------------|-----------------------------------------------|-------------------------------------------------|---------------------------|----------------------------------------------|---------------------|----------------------------------------------|------------------------------------|-----------------------------------|------------------------------------------|------------------------------------------------|--------------------------|--------------------------------|--------------------------------|--------------------|-------------------------------------|---------------------------------|-----------------------------------|-------------------------------|
| 13               | 1975 | Gao Shang                         | 1               | poor peasant             |                       | 0                      |                       |                         | 0                              |                           |                           |                                | 0                                      |                           |                                  |                        |                                      |                                      |                                         |                                 | 0                                                     | 39.6                                     | 0                          | 0                                             | 0.57                                            | 0                         | 0                                            |                     |                                              | 0                                  |                                   | 0                                        | 0                                              | 1.01                     | 0.00                           |                                |                    |                                     | 0.00                            | 0.00                              |                               |
| 14               | 1975 | Mu Zhaolin                        | 1               | poor peasant             | 14                    | 2                      | 1                     | 1                       | 5                              | 1                         | 2                         | 2                              | 42                                     |                           |                                  |                        | 552                                  |                                      |                                         |                                 | 35                                                    | 42                                       | 39.6                       | 1623                                          | 517                                             | 0.57                      | 295                                          | 30                  | 1948                                         |                                    | 480                               | 517                                      | 1.01                                           | 522.17                   | 20.00                          |                                | 523.24             | 18.93                               | 257.75                          | 276.68                            |                               |
| 15               | 1975 | Cao Cuizhen                       | 2               | poor peasant             | 22.5                  | 3                      | 2                     | 1                       | 6                              |                           |                           | 6                              | 60                                     |                           |                                  |                        | 1002                                 |                                      |                                         |                                 | 56                                                    | 60                                       | 39.6                       | 2376                                          | 946                                             | 0.77                      | 728                                          |                     | 3104                                         |                                    | 576                               | 946                                      | 1.03                                           | 974.38                   |                                |                                | 1017.77            | -43.39                              | 846.88                          | 803.49                            |                               |
| 16               | 1975 | Cao Jianren                       | 2               | poor peasant             | 14                    | 2                      | 1                     | 1                       | 6                              |                           | 2                         | 4                              | 56                                     |                           |                                  |                        | 718                                  |                                      |                                         |                                 | 35                                                    | 56                                       | 39.6                       | 2218                                          | 683                                             | 0.77                      | 526                                          |                     | 2744                                         |                                    | 576                               | 683                                      | 1.03                                           | 703.49                   |                                |                                | 703.49             |                                     |                                 | 703.49                            |                               |
| 17               | 1975 | Liu Guiwu                         | 1               | poor peasant             |                       | 0                      |                       |                         | 0                              |                           |                           |                                | 0                                      |                           |                                  |                        |                                      |                                      |                                         |                                 | 0                                                     | 39.6                                     | 0                          | 0                                             | 0.57                                            | 0                         | 0                                            |                     |                                              | 0                                  |                                   | 0                                        | 0                                              | 1.01                     | 0.00                           |                                |                    | 0.00                                | 0.00                            |                                   |                               |
| 18               | 1975 | Meng Mingde                       | 1               | poor peasant             | 26.5                  | 4                      | 2                     | 2                       | 8                              |                           | 1                         | 7                              | 78                                     |                           |                                  |                        | 1339                                 |                                      |                                         |                                 | 66                                                    | 78                                       | 39.6                       | 3089                                          | 1273                                            | 0.57                      | 726                                          |                     | 3814                                         |                                    | 768                               | 1273                                     | 1.01                                           | 1285.73                  | 3.66                           |                                | 1061.33            | 228.06                              | 925.84                          | 1153.90                           |                               |
| 19               | 1975 | Mu Shouliang                      | 1               | poor peasant             |                       | 0                      |                       |                         | 2                              |                           |                           | 2                              | 20                                     |                           |                                  |                        | 2                                    |                                      |                                         |                                 | 20                                                    | 39.6                                     | 792                        | 2                                             | 0.57                                            | 1                         |                                              | 793                 |                                              | 192                                | 2                                 | 1.01                                     | 2.02                                           | 50.00                    |                                | 160.40                         | -108.38            | -394.82                             | -503.20                         |                                   |                               |
| 20               | 1975 | Meng Mingbao                      | 1               | poor peasant             | 20.5                  | 3                      | 2                     | 1                       | 3                              |                           |                           | 3                              | 30                                     |                           |                                  |                        | 685                                  |                                      |                                         |                                 | 51                                                    | 30                                       | 39.6                       | 1188                                          | 634                                             | 0.57                      | 361                                          |                     | 1549                                         |                                    | 288                               | 634                                      | 1.01                                           | 640.34                   | 0.15                           |                                | 508.96             | 131.53                              | 785.67                          | 917.20                            |                               |
| 21               | 1975 | Meng Mingjin                      | 2               | poor peasant             |                       | 0                      |                       |                         | 1                              |                           |                           | 1                              | 10                                     |                           |                                  |                        | 194                                  |                                      |                                         |                                 | 10                                                    | 39.6                                     | 396                        | 194                                           | 0.77                                            | 149                       |                                              | 545                 |                                              | 192                                | 194                               | 1.03                                     | 199.82                                         |                          |                                | 309.65                         | -109.83            | 114.08                              | 4.25                            |                                   |                               |
| 22               | 1975 | Liang Shiren                      | 1               | low-middle-class peasant |                       | 0                      |                       |                         | 1                              |                           |                           | 1                              | 10                                     |                           |                                  |                        |                                      |                                      |                                         |                                 | 10                                                    | 39.6                                     | 495                        | 0                                             | 0.57                                            | 0                         |                                              | 495                 |                                              | 192                                | 0                                 | 1.01                                     | 0.00                                           | 340.00                   |                                | 106.87                         | 233.13             | -497.96                             | -264.83                         |                                   |                               |
| 23               | 1975 | Liang Yingfu                      | 1               | low-middle-class peasant | 20                    | 2                      | 2                     | 0                       | 4                              |                           |                           | 4                              | 40                                     |                           |                                  |                        | 824                                  |                                      |                                         |                                 | 50                                                    | 40                                       | 39.6                       | 1584                                          | 774                                             | 0.57                      | 441                                          | 30                  | 2055                                         |                                    | 384                               | 774                                      | 1.01                                           | 781.74                   | 0.15                           |                                | 843.55             | -61.66                              | 90.40                           | 28.74                             |                               |
| 24               | 1975 | Lei Guangzhi                      | 1               | low-middle-class peasant | 18                    | 2                      | 2                     | 0                       | 2                              |                           |                           | 2                              | 20                                     |                           |                                  |                        | 545                                  |                                      |                                         |                                 | 45                                                    | 20                                       | 39.6                       | 792                                           | 500                                             | 0.57                      | 285                                          |                     | 1077                                         |                                    | 192                               | 500                                      | 1.01                                           | 505.00                   |                                |                                | 273.58             | 231.42                              | -447.66                         | -216.24                           |                               |
| 25               | 1975 | Fan Lishi                         | 1               | middle-class peasant     | 38.5                  | 6                      | 3                     | 3                       | 9                              | 1                         |                           | 8                              | 86                                     |                           |                                  |                        | 1422                                 |                                      |                                         |                                 | 96                                                    | 86                                       | 39.6                       | 3406                                          | 1326                                            | 0.57                      | 756                                          | 30                  | 4191                                         |                                    | 672                               | 1326                                     | 1.01                                           | 1339.26                  | 7.90                           |                                | 1149.10            | 198.06                              | 880.16                          | 1078.22                           |                               |
| 26               | 1975 | Zhang Quangui                     | 2               | middle-class peasant     |                       | 0                      |                       |                         | 1                              |                           |                           | 1                              | 10                                     |                           |                                  |                        |                                      |                                      |                                         |                                 | 10                                                    | 39.6                                     | 396                        | 0                                             | 0.77                                            | 0                         |                                              | 396                 |                                              | 96                                 | 0                                 | 1.01                                     | 0.00                                           | 300.00                   |                                | 72.57                          | 227.43             | -235.44                             | -8.01                           |                                   |                               |
| 27               | 1975 | Wang Bangjie                      | 1               | low-middle-class peasant | 14                    | 2                      | 1                     | 1                       | 4                              | 1                         |                           | 3                              | 36                                     |                           |                                  |                        | 714                                  |                                      |                                         |                                 | 35                                                    | 36                                       | 39.6                       | 1426                                          | 679                                             | 0.57                      | 387                                          | 30                  | 1843                                         |                                    | 288                               | 679                                      | 1.01                                           | 685.79                   | 0.29                           |                                | 444.09             | 241.99                              | 163.19                          | 405.18                            |                               |
| 28               | 1975 | Meng Tianxing                     | 1               | low-middle-class peasant | 14                    | 2                      | 1                     | 1                       | 7                              | 1                         | 1                         | 5                              | 64                                     |                           |                                  |                        | 609                                  |                                      |                                         |                                 | 35                                                    | 64                                       | 39.6                       | 2534                                          | 574                                             | 0.57                      | 327                                          |                     | 2862                                         |                                    | 576                               | 574                                      | 1.01                                           | 579.74                   |                                |                                | 542.38             | 37.36                               | -98.59                          | -61.23                            |                               |
| 29               | 1975 | Xue Baolin                        | 1               | low-middle-class peasant | 4                     | 1                      | 0                     | 1                       | 5                              |                           | 1                         | 4                              | 48                                     |                           |                                  |                        | 86                                   |                                      |                                         |                                 | 10                                                    | 48                                       | 39.6                       | 1901                                          | 76                                              | 0.57                      | 43                                           |                     | 1944                                         |                                    | 480                               | 76                                       | 1.01                                           | 76.76                    | 100.00                         |                                | 315.68             | -138.92                             | 115.97                          | -22.95                            |                               |
| 30               | 1975 | Cao Cuiheng                       | 1               | low-middle-class peasant |                       | 0                      |                       |                         | 2                              |                           |                           | 2                              | 20                                     |                           |                                  |                        | 183                                  |                                      |                                         |                                 | 20                                                    | 39.6                                     | 792                        | 183                                           | 0.57                                            | 104                       |                                              | 896                 |                                              | 192                                | 183                               | 1.01                                     | 184.83                                         |                          |                                | 226.24                         | -41.41             | 312.65                              | 271.24                          |                                   |                               |
| 31               | 1975 | Ma Hongxiang                      | 1               | low-middle-class peasant | 4                     | 1                      | 0                     | 1                       | 4                              | 2                         | 1                         | 1                              | 30                                     |                           |                                  |                        | 67                                   |                                      |                                         |                                 | 10                                                    | 30                                       | 39.6                       | 1148                                          | 57                                              | 0.57                      | 32                                           |                     | 1180                                         |                                    | 288                               | 57                                       | 1.01                                           | 57.57                    | 198.00                         |                                | 187.55             | 68.02                               | -47.40                          | 20.62                             |                               |
| 32               | 1975 | Ruan Baorong                      | 1               | low-middle-class peasant | 24                    | 3                      | 2                     | 1                       | 4                              |                           |                           | 4                              | 40                                     |                           |                                  |                        | 1123                                 |                                      |                                         |                                 | 25                                                    | 40                                       | 39.6                       | 1584                                          | 1098                                            | 0.57                      | 626                                          |                     | 2210                                         |                                    | 576                               | 1098                                     | 1.01                                           | 1108.98                  | 8.40                           |                                | 900.83             | 216.55                              | 1235.86                         | 1452.41                           |                               |

(cont.)

| Household number | Year | Name of the head of the household | Production team | Class status (1)           | Basic work points (2) | Total labor forces (3) | Male labor forces (4) | Female labor forces (5) | Total household population (6) | Age: 1 to 3 years old (7) | Age: 4 to 7 years old (8) | Age: 8 years old and above (9) | Work points of grain distribution (10) | Laboring work points (11) | Farmyard manure work points (12) | Total work points (13) | Work points of compulsory labor (14) | Work points of help cultivation (15) | Work points of private plots labor (16) | Total deducted work points (17) | Actual workdays of participation in distribution (18) | Workpoints for rations distribution (19) | Rations per workpoint (20) | Total rations received from distribution (21) | Workdays of participation in distribution (22) | Grains per workpoint (23) | Total grains distributed by work-points (24) | Grains subsidy (25) | Total Grains received from distribution (26) | Distributed grains per person (27) | Distributed grains per adult (28) | Grains received from private plots (29) | Workdays of participation in distribution (30) | Value per workpoint (31) | Total value of workpoints (32) | Money used for investment (33) | Sum of income (34) | Money distributed in this year (34) | Deposit/debt of this year (35) | Deposit/debt over the years (36) | Accumulated deposit/debt (37) |         |
|------------------|------|-----------------------------------|-----------------|----------------------------|-----------------------|------------------------|-----------------------|-------------------------|--------------------------------|---------------------------|---------------------------|--------------------------------|----------------------------------------|---------------------------|----------------------------------|------------------------|--------------------------------------|--------------------------------------|-----------------------------------------|---------------------------------|-------------------------------------------------------|------------------------------------------|----------------------------|-----------------------------------------------|------------------------------------------------|---------------------------|----------------------------------------------|---------------------|----------------------------------------------|------------------------------------|-----------------------------------|-----------------------------------------|------------------------------------------------|--------------------------|--------------------------------|--------------------------------|--------------------|-------------------------------------|--------------------------------|----------------------------------|-------------------------------|---------|
| 33               | 1975 | Cao Qiguo                         | 1               | low-middle-class peasant   | 14                    | 2                      | 1                     | 1                       | 8                              | 1                         | 1                         | 6                              | 74                                     |                           |                                  |                        | 523                                  |                                      |                                         |                                 | 35                                                    |                                          | 74                         | 39.6                                          | 2930                                           | 488                       | 0.57                                         | 278                 | 30                                           | 3239                               |                                   | 672                                     | 488                                            | 1.01                     | 492.88                         | 150.00                         |                    | 621.75                              | 21.13                          | -214.52                          | -193.39                       |         |
| 34               | 1975 | Liu Jinliang                      | 1               | poor peasant               | 2.5                   | 1                      | 0                     | 1                       | 5                              |                           |                           | 5                              | 50                                     |                           |                                  |                        | 371                                  |                                      |                                         |                                 | 6                                                     |                                          | 50                         | 39.6                                          | 1980                                           | 365                       | 0.57                                         | 208                 |                                              | 2188                               |                                   | 480                                     | 365                                            | 1.01                     | 368.65                         |                                |                    | 546.57                              | -177.92                        | 685.71                           | 507.79                        |         |
| 35               | 1975 | Shi Baoshou                       | 1               | low-middle-class peasant   | 22                    | 4                      | 1                     | 3                       | 8                              | 1                         |                           | 7                              | 76                                     |                           |                                  |                        | 924                                  |                                      |                                         |                                 | 55                                                    |                                          | 76                         | 39.6                                          | 3010                                           | 869                       | 0.57                                         | 495                 |                                              | 3505                               |                                   | 672                                     | 869                                            | 1.01                     | 877.69                         | 40.85                          |                    | 694.06                              | 224.48                         | -1132.00                         | -907.52                       |         |
| 36               | 1975 | Wang Qiding                       | 2               | low-middle-class peasant   | 14                    | 2                      | 1                     | 1                       | 2                              |                           |                           | 2                              | 20                                     |                           |                                  |                        | 307                                  |                                      |                                         |                                 | 35                                                    |                                          | 20                         | 39.6                                          | 858                                            | 272                       | 0.77                                         | 209                 |                                              | 1067                               |                                   | 192                                     | 272                                            | 1.03                     | 280.16                         |                                |                    | 201.03                              | 79.13                          | -0.57                            | 78.56                         |         |
| 37               | 1975 | Yu Zhankui                        | 1               | poor peasant               | 4                     | 1                      | 0                     | 1                       | 5                              | 1                         | 1                         | 3                              | 44                                     |                           |                                  |                        | 126                                  |                                      |                                         |                                 | 10                                                    |                                          | 44                         | 39.6                                          | 1742                                           | 116                       | 0.57                                         | 66                  |                                              | 1809                               |                                   | 480                                     | 116                                            | 1.01                     | 117.16                         | 550.00                         |                    | 304.85                              | 362.31                         | -468.38                          | -106.07                       |         |
| 38               | 1975 | Liu Yucan                         | 1               | poor peasant               | 4                     | 2                      | 1                     | 1                       | 7                              | 1                         | 2                         | 4                              | 62                                     |                           |                                  |                        | 517                                  |                                      |                                         |                                 | 10                                                    |                                          | 62                         | 39.6                                          | 2455                                           | 507                       | 0.57                                         | 289                 |                                              | 2744                               |                                   | 576                                     | 507                                            | 1.01                     | 512.07                         | 1.69                           |                    | 618.80                              | -105.04                        | -403.95                          | -508.99                       |         |
| 39               | 1975 | Liu Guiting                       | 1               | middle-class peasant       |                       | 0                      |                       |                         | 3                              |                           |                           | 3                              | 30                                     |                           |                                  |                        | 446                                  |                                      |                                         |                                 |                                                       |                                          | 30                         | 39.6                                          | 1188                                           | 446                       | 0.57                                         | 254                 |                                              | 1442                               |                                   | 288                                     | 446                                            | 1.01                     | 450.46                         | 0.41                           |                    | 436.79                              | 14.08                          | 399.31                           | 413.39                        |         |
| 40               | 1975 | Liu Chengze                       | 1               | middle-class peasant       |                       | 0                      |                       |                         | 1                              |                           |                           | 1                              | 10                                     |                           |                                  |                        | 172                                  |                                      |                                         |                                 |                                                       |                                          | 10                         | 39.6                                          | 396                                            | 172                       | 0.57                                         | 98                  |                                              | 494                                |                                   | 96                                      | 172                                            | 1.01                     | 173.72                         |                                |                    | 144.67                              | 29.05                          | 114.67                           | 143.72                        |         |
| 41               | 1975 | Li Jinhu                          | 1               | middle-class peasant       | 10                    | 1                      | 1                     | 0                       | 3                              |                           |                           | 3                              | 30                                     |                           |                                  |                        | 545                                  |                                      |                                         |                                 | 25                                                    |                                          | 30                         | 39.6                                          | 1188                                           | 520                       | 0.57                                         | 296                 |                                              | 1484                               |                                   | 288                                     | 520                                            | 1.01                     | 525.20                         |                                |                    | 584.74                              | -59.54                         | 401.56                           | 342.02                        |         |
| 42               | 1975 | Meng Xiqing                       | 2               | poor peasant               | 24                    | 3                      | 2                     | 1                       | 7                              |                           | 1                         | 6                              | 68                                     |                           |                                  |                        | 1024                                 |                                      |                                         |                                 | 60                                                    |                                          | 68                         | 39.6                                          | 2693                                           | 964                       | 0.77                                         | 742                 |                                              | 3435                               |                                   | 672                                     | 964                                            | 1.03                     | 992.92                         | 14.38                          |                    | 936.88                              | 70.42                          | 402.77                           | 473.19                        |         |
| 43               | 1975 | Li Shucheng                       | 1               | poor peasant               | 12                    | 2                      | 1                     | 1                       | 5                              |                           |                           | 5                              | 50                                     |                           |                                  |                        | 936                                  |                                      |                                         |                                 | 30                                                    |                                          | 50                         | 39.6                                          | 1980                                           | 906                       | 0.57                                         | 516                 |                                              | 2496                               |                                   | 672                                     | 906                                            | 1.01                     | 915.06                         | 8.40                           |                    | 1174.14                             | -250.68                        | 887.22                           | 636.54                        |         |
| 44               | 1975 | Wang Guiying                      | 1               | low-middle-class peasant   | 18                    | 3                      | 1                     | 2                       | 5                              | 2                         |                           | 3                              | 42                                     |                           |                                  |                        | 658                                  |                                      |                                         |                                 | 45                                                    |                                          | 42                         | 39.6                                          | 1603                                           | 613                       | 0.57                                         | 349                 |                                              | 1952                               |                                   | 288                                     | 613                                            | 1.01                     | 619.13                         | 0.76                           |                    | 527.75                              | 92.14                          | 450.52                           | 542.66                        |         |
| 45               | 1975 | Zuo Yunxian                       | 1               | upper-middle-class peasant | 36                    | 6                      | 2                     | 4                       | 10                             | 1                         |                           | 9                              | 96                                     |                           |                                  |                        | 1815                                 |                                      |                                         |                                 | 90                                                    |                                          | 96                         | 39.6                                          | 3802                                           | 1725                      | 0.57                                         | 983                 | 30                                           | 4815                               |                                   | 864                                     | 1725                                           | 1.01                     | 1742.25                        |                                |                    | 1260.40                             | 481.85                         | 1331.07                          | 1812.92                       |         |
| 46               | 1975 | Gao Peijie                        | 1               | poor peasant               | 10                    | 1                      | 1                     | 0                       | 2                              |                           |                           | 2                              | 20                                     |                           |                                  |                        | 414                                  |                                      |                                         |                                 | 25                                                    |                                          | 20                         | 39.6                                          | 792                                            | 389                       | 0.57                                         | 222                 |                                              | 1014                               |                                   | 192                                     | 389                                            | 1.01                     | 392.89                         |                                |                    | 284.26                              | 108.63                         | 93.59                            | 202.22                        |         |
| 47               | 1975 | Wang Qisheng                      | 1               | poor peasant               | 12.5                  | 2                      | 1                     | 1                       | 6                              |                           | 1                         | 5                              | 58                                     |                           |                                  |                        | 463                                  |                                      |                                         |                                 | 31                                                    |                                          | 58                         | 39.6                                          | 2297                                           | 432                       | 0.57                                         | 246                 |                                              | 2543                               |                                   | 576                                     | 432                                            | 1.01                     | 436.32                         | 140.00                         |                    | 482.93                              | 93.39                          | -691.15                          |                               |         |
| 48               | 1975 | Chen Yuzhong                      | 2               | poor peasant               | 18                    | 3                      | 1                     | 2                       | 6                              |                           |                           | 6                              | 60                                     |                           |                                  |                        | 813                                  |                                      |                                         |                                 | 45                                                    |                                          | 60                         | 39.6                                          | 2376                                           | 768                       | 0.77                                         | 591                 |                                              | 2967                               |                                   | 576                                     | 768                                            | 1.03                     | 791.04                         |                                |                    | 611.65                              | 179.39                         | 40.91                            | 220.30                        |         |
| 49               | 1975 | Meng Tianchang                    | 2               | poor peasant               | 14                    | 2                      | 1                     | 1                       | 6                              | 1                         | 1                         | 4                              | 54                                     |                           |                                  |                        | 555                                  |                                      |                                         |                                 | 35                                                    |                                          | 54                         | 39.6                                          | 2138                                           | 520                       | 0.77                                         | 400                 |                                              | 2539                               |                                   | 480                                     | 520                                            | 1.03                     | 535.60                         | 52.34                          |                    | 507.05                              | 80.89                          | -255.02                          | -174.13                       |         |
| 50               | 1975 | Wang Xizhi                        | 2               | middle-class peasant       | 6.5                   | 2                      | 0                     | 2                       | 5                              |                           |                           | 5                              | 50                                     |                           |                                  |                        | 678                                  |                                      |                                         |                                 | 16                                                    |                                          | 50                         | 39.6                                          | 1980                                           | 662                       | 0.77                                         | 510                 |                                              | 2490                               |                                   | 576                                     | 662                                            | 1.03                     | 681.86                         |                                |                    | 795.45                              | -113.59                        | 285.86                           | 172.27                        |         |
| 51               | 1975 | Jia Jinkui                        | 2               | low-middle-class peasant   |                       | 0                      |                       |                         | 0                              |                           |                           |                                | 0                                      |                           |                                  |                        |                                      |                                      |                                         |                                 |                                                       |                                          | 0                          | 39.6                                          | 0                                              | 0                         | 0                                            | 0.77                | 0                                            |                                    | 0                                 |                                         | 0                                              | 0                        | 1.03                           | 0.00                           | 400.00             |                                     |                                | 400.00                           | -837.70                       | -437.70 |
| 52               | 1975 | Ji Yunxian                        | 2               | poor peasant               | 8                     | 1                      | 1                     | 0                       | 1                              |                           |                           | 1                              | 10                                     |                           |                                  |                        | 353                                  |                                      |                                         |                                 | 20                                                    |                                          | 10                         | 39.6                                          | 396                                            | 333                       | 0.77                                         | 256                 |                                              | 652                                |                                   | 96                                      | 333                                            | 1.03                     | 342.99                         |                                |                    | 199.19                              | 143.80                         | 207.86                           | 351.66                        |         |
| 53               | 1975 | Zhang Yumei                       | 1               | poor peasant               | 10.5                  | 2                      | 1                     | 1                       | 2                              |                           |                           | 2                              | 20                                     |                           |                                  |                        | 379                                  |                                      |                                         |                                 | 26                                                    |                                          | 20                         | 39.6                                          | 891                                            | 353                       | 0.57                                         | 201                 |                                              | 1092                               |                                   | 288                                     | 353                                            | 1.01                     | 356.53                         |                                |                    | 263.30                              | 93.23                          | 125.17                           | 218.40                        |         |



DATASET DONGBEILI-SHANXI

(cont.)

| Household number | Year | Name of the head of the household | Production team | Class status (1)         | Basic work points (2) | Total labor forces (3) | Male labor forces (4) | Female labor forces (5) | Total household population (6) | Age: 1 to 3 years old (7) | Age: 4 to 7 years old (8) | Age: 8 years old and above (9) | Work points of grain distribution (10) | Laboring work points (11) | Farmyard manure work points (12) | Total work points (13) | Work points of compulsory labor (14) | Work points of help cultivation (15) | Work points of private plots labor (16) | Total deducted work points (17) | Acutal workdays of participation in distribution (18) | Workpoints for rations distribution (19) | Rations per workpoint (20) | Total rations received form distribution (21) | Workdays of participation in distribu-tion (22) | Grains per workpoint (23) | Total grains distributed by work-points (24) | Grains subsidy (25) | Total Grains received from distribution (26) | Distributed grains per person (27) | Distributed grains per adult (28) | Grains received from privated plots (29) | Workdays of participation in distribution (30) | Value per workpoint (31) | Total value of workpoints (32) | Money used for investment (33) | Sum of income (34) | Money distributed in this year (34) | Deposit/ debt of this year (35) | Deposit/ debt over the years (36) | Accumulated deposit/debt (37) |
|------------------|------|-----------------------------------|-----------------|--------------------------|-----------------------|------------------------|-----------------------|-------------------------|--------------------------------|---------------------------|---------------------------|--------------------------------|----------------------------------------|---------------------------|----------------------------------|------------------------|--------------------------------------|--------------------------------------|-----------------------------------------|---------------------------------|-------------------------------------------------------|------------------------------------------|----------------------------|-----------------------------------------------|-------------------------------------------------|---------------------------|----------------------------------------------|---------------------|----------------------------------------------|------------------------------------|-----------------------------------|------------------------------------------|------------------------------------------------|--------------------------|--------------------------------|--------------------------------|--------------------|-------------------------------------|---------------------------------|-----------------------------------|-------------------------------|
| 54               | 1975 | Wang Jishi                        | 1               | middle-class peasant     | 18.5                  | 3                      | 1                     | 2                       | 3                              |                           |                           | 3                              | 30                                     |                           |                                  |                        | 785                                  |                                      |                                         |                                 | 46                                                    |                                          | 30                         | 39.6                                          | 1188                                            | 739                       | 0.57                                         | 421                 |                                              | 1609                               |                                   | 288                                      | 739                                            | 1.01                     | 746.39                         |                                | 869.15             | -122.76                             | 1430.06                         | 1307.30                           |                               |
| 55               | 1975 | Mu Zhaosheng                      | 2               | middle-class peasant     | 14                    | 2                      | 1                     | 1                       | 6                              | 1                         | 1                         | 4                              | 54                                     |                           |                                  |                        | 472                                  |                                      |                                         |                                 | 35                                                    |                                          | 54                         | 39.6                                          | 2138                                            | 437                       | 0.77                                         | 336                 | 30                                           | 2505                               |                                   | 480                                      | 437                                            | 1.03                     | 450.11                         |                                | 540.01             | -89.90                              | 81.19                           | -8.71                             |                               |
| 56               | 1975 | Li Cuilan                         | 2               | middle-class peasant     | 4                     | 1                      | 0                     | 1                       | 3                              |                           |                           | 3                              | 30                                     |                           |                                  |                        | 211                                  |                                      |                                         |                                 | 10                                                    |                                          | 30                         | 39.6                                          | 1188                                            | 201                       | 0.77                                         | 155                 |                                              | 1343                               |                                   | 288                                      | 201                                            | 1.03                     | 207.03                         | 40.00                          | 229.20             | 17.83                               | 11.02                           | 28.85                             |                               |
| 57               | 1975 | Ma Shanming                       | 2               | middle-class peasant     | 18                    | 3                      | 1                     | 2                       | 7                              |                           | 1                         | 6                              | 68                                     |                           |                                  |                        | 735                                  |                                      |                                         |                                 | 45                                                    |                                          | 68                         | 39.6                                          | 2693                                            | 690                       | 0.77                                         | 531                 |                                              | 3224                               |                                   | 672                                      | 690                                            | 1.03                     | 710.70                         |                                | 609.29             | 101.41                              | -911.42                         | -810.01                           |                               |
| 58               | 1975 | Liang Xiulan                      | 2               | middle-class peasant     |                       | 0                      |                       |                         | 0                              |                           |                           |                                | 0                                      |                           |                                  |                        |                                      |                                      |                                         |                                 | 0                                                     |                                          | 39.6                       | 0                                             | 0                                               | 0                         | 0.77                                         | 0                   |                                              | 0                                  |                                   | 0                                        | 0                                              | 1.03                     | 0.00                           |                                |                    | 0.00                                |                                 | 0.00                              |                               |
| 59               | 1975 | Cui Yongchang                     | 1               | poor peasant             | 2.5                   | 1                      | 0                     | 1                       | 4                              |                           |                           | 4                              | 40                                     |                           |                                  |                        | 685                                  |                                      |                                         |                                 | 6                                                     |                                          | 40                         | 39.6                                          | 1584                                            | 679                       | 0.57                                         | 387                 |                                              | 1971                               |                                   | 480                                      | 679                                            | 1.01                     | 685.79                         |                                | 414.50             | 271.29                              | -8.93                           | 262.36                            |                               |
| 60               | 1975 | Zhang Hengshou                    | 1               | low-middle-class peasant | 18                    | 3                      | 1                     | 2                       | 8                              | 1                         | 1                         | 6                              | 74                                     |                           |                                  |                        | 718                                  |                                      |                                         |                                 | 45                                                    |                                          | 74                         | 39.6                                          | 2930                                            | 673                       | 0.57                                         | 384                 |                                              | 3314                               |                                   | 672                                      | 673                                            | 1.01                     | 679.73                         |                                | 705.70             | -25.97                              | 227.42                          | 201.45                            |                               |
| 61               | 1975 | Zhao Yingtong                     | 1               | poor peasant             | 12.5                  | 2                      | 1                     | 1                       | 3                              |                           |                           | 3                              | 30                                     |                           |                                  |                        | 594                                  |                                      |                                         |                                 | 31                                                    |                                          | 30                         | 39.6                                          | 1188                                            | 563                       | 0.57                                         | 321                 |                                              | 1509                               |                                   | 288                                      | 563                                            | 1.01                     | 568.63                         |                                | 536.39             | 32.24                               | 523.96                          | 556.20                            |                               |
| 62               | 1975 | Wu Xinggui                        | 1               | poor peasant             | 14                    | 2                      | 1                     | 1                       | 5                              | 1                         | 1                         | 3                              | 44                                     |                           |                                  |                        | 629                                  |                                      |                                         |                                 | 35                                                    |                                          | 44                         | 39.6                                          | 1742                                            | 594                       | 0.57                                         | 339                 |                                              | 2081                               |                                   | 384                                      | 594                                            | 1.01                     | 599.94                         | 2.96                           | 642.39             | -39.49                              | 137.42                          | 97.93                             |                               |
| 63               | 1975 | Wang Youfeng                      | 1               | poor peasant             | 4                     | 1                      | 0                     | 1                       | 3                              |                           |                           | 3                              | 30                                     |                           |                                  |                        | 411                                  |                                      |                                         |                                 | 10                                                    |                                          | 30                         | 39.6                                          | 1188                                            | 401                       | 0.57                                         | 229                 |                                              | 1417                               |                                   | 288                                      | 401                                            | 1.01                     | 405.01                         |                                | 294.02             | 110.99                              | -62.41                          | 48.58                             |                               |
| 64               | 1975 | Wang Qingsheng                    | 1               | poor peasant             | 10                    | 1                      | 1                     | 0                       | 1                              |                           |                           | 1                              | 10                                     |                           |                                  |                        | 405                                  |                                      |                                         |                                 | 10                                                    |                                          | 39.6                       | 462                                           | 405                                             | 0.57                      | 231                                          |                     | 693                                          |                                    | 192                               | 405                                      | 1.01                                           | 409.05                   |                                | 438.94                         | -29.89             | 521.63                              | 491.74                          |                                   |                               |
| 65               | 1975 | Li Yulin                          | 1               | middle-class peasant     |                       | 0                      |                       |                         | 2                              |                           |                           | 2                              | 20                                     |                           |                                  |                        | 134                                  |                                      |                                         |                                 | 20                                                    |                                          | 39.6                       | 792                                           | 134                                             | 0.57                      | 76                                           |                     | 868                                          |                                    | 288                               | 134                                      | 1.01                                           | 135.34                   |                                | 246.45                         | -111.11            | 303.62                              | 192.51                          |                                   |                               |
| 66               | 1975 | Zuo Chunlan                       | 1               | middle-class peasant     | 4                     | 1                      | 0                     | 1                       | 5                              |                           | 1                         | 4                              | 48                                     |                           |                                  |                        | 71                                   |                                      |                                         |                                 | 10                                                    |                                          | 48                         | 39.6                                          | 1901                                            | 61                        | 0.57                                         | 35                  |                                              | 1936                               |                                   | 576                                      | 61                                             | 1.01                     | 61.61                          | 277.00                         | 329.18             | 9.43                                | -52.46                          | -43.03                            |                               |
| 67               | 1975 | Gao Chongji                       | 1               | poor peasant             | 28.5                  | 5                      | 2                     | 3                       | 9                              |                           |                           | 9                              | 90                                     |                           |                                  |                        | 1064                                 |                                      |                                         |                                 | 71                                                    |                                          | 90                         | 39.6                                          | 3564                                            | 993                       | 0.57                                         | 566                 |                                              | 4130                               |                                   | 768                                      | 993                                            | 1.01                     | 1002.93                        | 200.00                         | 1157.14            | 45.79                               | 955.39                          | 1001.18                           |                               |
| 68               | 1975 | Gao Chongwen                      | 1               | poor peasant             | 24.5                  | 4                      | 2                     | 2                       | 8                              |                           | 1                         | 7                              | 78                                     |                           |                                  |                        | 1136                                 |                                      |                                         |                                 | 61                                                    |                                          | 78                         | 39.6                                          | 3089                                            | 1075                      | 0.57                                         | 613                 |                                              | 3702                               |                                   | 768                                      | 1075                                           | 1.01                     | 1085.75                        | 3.32                           | 772.80             | 316.27                              | -38.12                          | 278.15                            |                               |
| 69               | 1975 | Gao Peiren                        | 1               | poor peasant             | 26                    | 4                      | 2                     | 2                       | 8                              |                           |                           | 8                              | 80                                     |                           |                                  |                        | 1150                                 |                                      |                                         |                                 | 65                                                    |                                          | 80                         | 39.6                                          | 3168                                            | 1085                      | 0.57                                         | 618                 |                                              | 3786                               |                                   | 768                                      | 1085                                           | 1.01                     | 1095.85                        | 0.15                           | 934.99             | 161.01                              | 455.25                          | 616.26                            |                               |
| 70               | 1975 | Wang Jingyi                       | 1               | low-middle-class peasant | 10.5                  | 3                      | 0                     | 3                       | 4                              | 1                         |                           | 3                              | 36                                     |                           |                                  |                        | 302                                  |                                      |                                         |                                 | 26                                                    |                                          | 36                         | 39.6                                          | 1376                                            | 276                       | 0.57                                         | 157                 |                                              | 1533                               |                                   | 192                                      | 276                                            | 1.01                     | 278.76                         | 40.51                          | 335.85             | -16.58                              | 238.87                          | 222.29                            |                               |
| 71               | 1975 | Wang Shutang                      | 1               | low-middle-class peasant | 14                    | 2                      | 1                     | 1                       | 5                              | 1                         |                           | 4                              | 46                                     |                           |                                  |                        | 564                                  |                                      |                                         |                                 | 35                                                    |                                          | 46                         | 39.6                                          | 1822                                            | 529                       | 0.57                                         | 302                 | 30                                           | 2153                               |                                   | 384                                      | 529                                            | 1.01                     | 534.29                         |                                | 536.39             | -2.10                               | 558.80                          | 556.70                            |                               |
| 72               | 1975 | Meng Peizhong                     | 1               | middle-class peasant     |                       | 0                      |                       |                         | 1                              |                           |                           | 1                              | 10                                     |                           |                                  |                        | 360                                  |                                      |                                         |                                 |                                                       |                                          | 10                         | 39.6                                          | 396                                             | 360                       | 0.57                                         | 205                 |                                              | 601                                |                                   | 96                                       | 360                                            | 1.01                     | 363.60                         |                                | 380.84             | -17.24                              | 605.59                          | 588.35                            |                               |
| 73               | 1975 | Meng Peixing                      | 1               | middle-class peasant     | 10.5                  | 2                      | 1                     | 1                       | 4                              |                           |                           | 4                              | 40                                     |                           |                                  |                        | 468                                  |                                      |                                         |                                 | 26                                                    |                                          | 40                         | 39.6                                          | 1584                                            | 442                       | 0.57                                         | 252                 |                                              | 1836                               |                                   | 576                                      | 442                                            | 1.01                     | 446.42                         |                                | 451.88             | -5.46                               | 256.83                          | 251.37                            |                               |



(cont.)

| Household number | Year | Name of the head of the household | Production team | Class status (1)         | Basic work points (2) | Total labor forces (3) | Male labor forces (4) | Female labor forces (5) | Total household population (6) | Age: 1 to 3 years old (7) | Age: 4 to 7 years old (8) | Age: 8 years old and above (9) | Work points of grain distribution (10) | Laboring work points (11) | Farmyard manure work points (12) | Total work points (13) | Work points of compulsory labor (14) | Work points of help cultivation (15) | Work points of private plots labor (16) | Total deducted work points (17) | Actual workdays of participation in distribution (18) | Workpoints for rations distribution (19) | Rations per workpoint (20) | Total rations received from distribution (21) | Workdays of participation in distribution (22) | Grains per workpoint (23) | Total grains distributed by work-points (24) | Grains subsidy (25) | Total Grains received from distribution (26) | Distributed grains per person (27) | Distributed grains per adult (28) | Grains received from private plots (29) | Workdays of participation in distribution (30) | Value per workpoint (31) | Total value of workpoints (32) | Money used for investment (33) | Sum of income (34) | Money distributed in this year (34) | Deposit/debt of this year (35) | Deposit/debt over the years (36) | Accumulated deposit/debt (37) |
|------------------|------|-----------------------------------|-----------------|--------------------------|-----------------------|------------------------|-----------------------|-------------------------|--------------------------------|---------------------------|---------------------------|--------------------------------|----------------------------------------|---------------------------|----------------------------------|------------------------|--------------------------------------|--------------------------------------|-----------------------------------------|---------------------------------|-------------------------------------------------------|------------------------------------------|----------------------------|-----------------------------------------------|------------------------------------------------|---------------------------|----------------------------------------------|---------------------|----------------------------------------------|------------------------------------|-----------------------------------|-----------------------------------------|------------------------------------------------|--------------------------|--------------------------------|--------------------------------|--------------------|-------------------------------------|--------------------------------|----------------------------------|-------------------------------|
| 74               | 1975 | Meng Mingbiao                     | 1               | middle-class peasant     | 14                    | 2                      | 1                     | 1                       | 7                              | 1                         |                           | 6                              | 66                                     |                           |                                  |                        | 459                                  |                                      |                                         |                                 | 35                                                    | 66                                       | 39.6                       | 2614                                          | 424                                            | 0.57                      | 242                                          |                     | 2855                                         |                                    |                                   | 576                                     | 424                                            | 1.01                     | 428.24                         | 300.00                         |                    | 534.15                              | 194.09                         | -461.26                          | -267.17                       |
| 75               | 1975 | Xue Yuhua                         | 2               | poor peasant             | 16.5                  | 3                      | 1                     | 2                       | 3                              |                           |                           | 3                              | 30                                     |                           |                                  |                        | 593                                  |                                      |                                         |                                 | 41                                                    | 30                                       | 39.6                       | 1188                                          | 552                                            | 0.77                      | 425                                          |                     | 1613                                         |                                    |                                   | 288                                     | 552                                            | 1.03                     | 568.56                         |                                |                    | 313.58                              | 254.98                         | -554.66                          | -299.68                       |
| 76               | 1975 | Wang Chuanai                      | 1               | middle-class peasant     | 4                     | 1                      | 0                     | 1                       | 6                              | 1                         | 1                         | 4                              | 54                                     |                           |                                  |                        | 44                                   |                                      |                                         |                                 | 10                                                    | 54                                       | 39.6                       | 2138                                          | 34                                             | 0.57                      | 19                                           |                     | 2158                                         |                                    |                                   | 480                                     | 34                                             | 1.01                     | 34.34                          | 120.00                         |                    | 342.42                              | -188.08                        | -167.20                          | -355.28                       |
| 77               | 1975 | Wang Zhenguo                      | 1               | low-middle-class peasant | 10.5                  | 2                      | 1                     | 1                       | 4                              |                           | 1                         | 3                              | 38                                     |                           |                                  |                        | 779                                  |                                      |                                         |                                 | 26                                                    | 38                                       | 39.6                       | 1505                                          | 753                                            | 0.77                      | 580                                          |                     | 2085                                         |                                    |                                   | 384                                     | 753                                            | 1.03                     | 775.59                         | 0.94                           |                    | 840.54                              | -64.01                         | 363.34                           | 299.33                        |
| 78               | 1975 | Mu Shouquan                       | 1               | poor peasant             | 2.5                   | 1                      | 0                     | 1                       | 2                              |                           |                           | 2                              | 20                                     |                           |                                  |                        | 351                                  |                                      |                                         |                                 | 6                                                     | 20                                       | 39.6                       | 792                                           | 345                                            | 0.57                      | 197                                          |                     | 989                                          |                                    |                                   | 192                                     | 345                                            | 1.01                     | 348.45                         |                                |                    | 321.64                              | 26.81                          | 609.92                           | 636.73                        |
| 79               | 1975 | Mu Zhaozheng                      | 1               | poor peasant             | 14                    | 2                      | 1                     | 1                       | 6                              | 1                         | 1                         | 4                              | 54                                     |                           |                                  |                        | 801                                  |                                      |                                         |                                 | 35                                                    | 54                                       | 39.6                       | 2138                                          | 766                                            | 0.57                      | 437                                          | 30                  | 2605                                         |                                    |                                   | 480                                     | 766                                            | 1.01                     | 773.66                         | 0.54                           |                    | 661.28                              | 112.92                         | 620.46                           | 733.38                        |
| 80               | 1975 | Ma Likui                          | 1               | poor peasant             | 18                    | 3                      | 1                     | 2                       | 7                              | 2                         |                           | 5                              | 62                                     |                           |                                  |                        | 1155                                 |                                      |                                         |                                 | 45                                                    | 62                                       | 39.6                       | 2455                                          | 1110                                           | 0.57                      | 633                                          |                     | 3088                                         |                                    |                                   | 384                                     | 1110                                           | 1.01                     | 1121.10                        | 2.51                           |                    | 845.08                              | 278.53                         | 936.79                           | 1215.32                       |
| 81               | 1975 | Ma Xiulan                         | 1               | middle-class peasant     | 4                     | 1                      | 0                     | 1                       | 6                              | 1                         |                           | 5                              | 56                                     |                           |                                  |                        | 211                                  |                                      |                                         |                                 | 10                                                    | 56                                       | 39.6                       | 2218                                          | 201                                            | 0.57                      | 115                                          |                     | 2332                                         |                                    |                                   | 576                                     | 201                                            | 1.01                     | 203.01                         | 227.00                         |                    | 380.88                              | 49.13                          | -32.94                           | 16.19                         |
| 82               | 1975 | Wang Dianjie                      | 1               | middle-class peasant     | 28                    | 4                      | 2                     | 2                       | 8                              |                           | 1                         | 7                              | 78                                     |                           |                                  |                        | 1107                                 |                                      |                                         |                                 | 70                                                    | 78                                       | 39.6                       | 3089                                          | 1037                                           | 0.57                      | 591                                          |                     | 3680                                         |                                    |                                   | 768                                     | 1037                                           | 1.01                     | 1047.37                        | 2.35                           |                    | 916.39                              | 133.33                         | 468.79                           | 602.12                        |
| 83               | 1975 | Wang Litang                       | 2               | low-middle-class peasant | 14                    | 2                      | 1                     | 1                       | 8                              | 1                         |                           | 7                              | 76                                     |                           |                                  |                        | 1008                                 |                                      |                                         |                                 | 35                                                    | 76                                       | 39.6                       | 3010                                          | 973                                            | 0.77                      | 749                                          |                     | 3759                                         |                                    |                                   | 864                                     | 973                                            | 1.03                     | 1002.19                        | 5.42                           |                    | 960.10                              | 47.51                          | 384.19                           | 431.70                        |
| 84               | 1975 | Wei Zhaoliang                     | 1               | low-middle-class peasant | 22                    | 3                      | 2                     | 1                       | 4                              |                           |                           | 4                              | 40                                     |                           |                                  |                        | 731                                  |                                      |                                         |                                 | 55                                                    | 40                                       | 39.6                       | 1584                                          | 676                                            | 0.57                      | 385                                          |                     | 1969                                         |                                    |                                   | 384                                     | 676                                            | 1.01                     | 682.76                         |                                |                    | 586.34                              | 96.42                          | 372.25                           | 468.67                        |
| 85               | 1975 | Yang Zhongwen                     | 1               | middle-class peasant     |                       | 0                      |                       |                         | 2                              |                           |                           | 2                              | 20                                     |                           |                                  |                        | 11                                   |                                      |                                         |                                 | 20                                                    | 39.6                                     | 792                        | 11                                            | 0.57                                           | 6                         |                                              | 798                 |                                              |                                    | 192                               | 11                                      | 1.01                                           | 11.11                    |                                |                                | 146.36             | -135.25                             | -921.69                        | -1056.94                         |                               |
| 86               | 1975 | Zhu Guangchang                    | 1               | middle-class peasant     | 24                    | 3                      | 2                     | 1                       | 4                              |                           |                           | 4                              | 40                                     |                           |                                  |                        | 952                                  |                                      |                                         |                                 | 60                                                    | 40                                       | 39.6                       | 1584                                          | 892                                            | 0.57                      | 508                                          | 30                  | 2122                                         |                                    |                                   | 384                                     | 892                                            | 1.01                     | 900.92                         | 5.17                           |                    | 1144.04                             | -237.95                        | 1080.29                          | 842.34                        |
| 87               | 1975 | Yang Yugui                        | 1               | middle-class peasant     | 18                    | 2                      | 2                     | 0                       | 3                              |                           |                           | 3                              | 30                                     |                           |                                  |                        | 585                                  |                                      |                                         |                                 | 45                                                    | 30                                       | 39.6                       | 1188                                          | 540                                            | 0.57                      | 308                                          |                     | 1496                                         |                                    |                                   | 288                                     | 540                                            | 1.01                     | 545.40                         | 0.10                           |                    | 361.67                              | 183.83                         | 59.00                            | 242.83                        |
| 88               | 1975 | Yang Yingzhou                     | 2               | middle-class peasant     | 14                    | 2                      | 1                     | 1                       | 3                              |                           |                           | 3                              | 30                                     |                           |                                  |                        | 467                                  |                                      |                                         |                                 | 35                                                    | 30                                       | 39.6                       | 1188                                          | 432                                            | 0.77                      | 333                                          | 30                  | 1551                                         |                                    |                                   | 288                                     | 432                                            | 1.03                     | 444.96                         | 0.09                           |                    | 402.34                              | 42.71                          | 25.90                            | 68.61                         |
| 89               | 1975 | Li Kailiang                       | 1               | poor peasant             | 10                    | 1                      | 1                     | 0                       | 2                              |                           |                           | 2                              | 20                                     |                           |                                  |                        | 359                                  |                                      |                                         |                                 | 25                                                    | 20                                       | 39.6                       | 792                                           | 334                                            | 0.57                      | 190                                          |                     | 982                                          |                                    |                                   | 288                                     | 334                                            | 1.01                     | 337.34                         |                                |                    | 325.96                              | 11.38                          | 343.39                           | 354.77                        |
| 90               | 1975 | Li Kaigong                        | 1               | poor peasant             | 2.5                   | 1                      | 0                     | 1                       | 2                              |                           |                           | 2                              | 20                                     |                           |                                  |                        | 332                                  |                                      |                                         |                                 | 6                                                     | 20                                       | 39.6                       | 792                                           | 326                                            | 0.57                      | 186                                          |                     | 978                                          |                                    |                                   | 288                                     | 326                                            | 1.01                     | 329.26                         |                                |                    | 361.29                              | -32.03                         | 648.72                           | 616.69                        |
| 91               | 1975 | Meng Jingcan                      | 1               | poor peasant             |                       | 0                      |                       |                         | 1                              |                           |                           | 1                              | 10                                     |                           |                                  |                        |                                      |                                      |                                         |                                 | 10                                                    | 39.6                                     | 396                        | 0                                             | 0.57                                           | 0                         |                                              | 396                 |                                              |                                    | 192                               | 0                                       | 1.01                                           | 0.00                     | 40.00                          |                                | 98.68              | -58.68                              | 53.17                          | -5.51                            |                               |
| 92               | 1975 | Fu Lidong                         | 1               | middle-class peasant     |                       | 0                      |                       |                         | 1                              |                           |                           | 1                              | 10                                     |                           |                                  |                        | 163                                  |                                      |                                         |                                 | 10                                                    | 39.6                                     | 396                        | 163                                           | 0.57                                           | 93                        |                                              | 489                 |                                              |                                    | 96                                | 163                                     | 1.01                                           | 164.63                   |                                |                                | 154.31             | 10.32                               | 220.88                         | 231.20                           |                               |

(cont.)

| Household number | Year | Name of the head of the household | Production team | Class status (1)         | Basic work points (2) | Total labor forces (3) | Male labor forces (4) | Female labor forces (5) | Total household population (6) | Age: 1 to 3 years old (7) | Age: 4 to 7 years old (8) | Age: 8 years old and above (9) | Work points of grain distribution (10) | Laboring work points (11) | Farmyard manure work points (12) | Total work points (13) | Work points of compulsory labor (14) | Work points of help cultivation (15) | Work points of private plots labor (16) | Total deducted work points (17) | Actual workdays of participation in distribution (18) | Workpoints for rations distribution (19) | Rations per workpoint (20) | Total rations received from distribution (21) | Workdays of participation in distribution (22) | Grains per workpoint (23) | Total grains distributed by work-points (24) | Grains subsidy (25) | Total Grains received from distribution (26) | Distributed grains per person (27) | Distributed grains per adult (28) | Grains received from private plots (29) | Workdays of participation in distribution (30) | Value per workpoint (31) | Total value of workpoints (32) | Money used for investment (33) | Sum of income (34) | Money distributed in this year (34) | Deposit/ debt of this year (35) | Deposit/ debt over the years (36) | Accumulated deposit/debt (37) |          |
|------------------|------|-----------------------------------|-----------------|--------------------------|-----------------------|------------------------|-----------------------|-------------------------|--------------------------------|---------------------------|---------------------------|--------------------------------|----------------------------------------|---------------------------|----------------------------------|------------------------|--------------------------------------|--------------------------------------|-----------------------------------------|---------------------------------|-------------------------------------------------------|------------------------------------------|----------------------------|-----------------------------------------------|------------------------------------------------|---------------------------|----------------------------------------------|---------------------|----------------------------------------------|------------------------------------|-----------------------------------|-----------------------------------------|------------------------------------------------|--------------------------|--------------------------------|--------------------------------|--------------------|-------------------------------------|---------------------------------|-----------------------------------|-------------------------------|----------|
| 93               | 1975 | Meng Peicheng                     | 2               | middle-class peasant     | 14                    | 2                      | 1                     | 1                       | 9                              | 1                         | 2                         | 6                              | 82                                     |                           |                                  |                        | 544                                  |                                      |                                         |                                 | 35                                                    |                                          | 82                         | 39.6                                          | 3247                                           | 509                       | 0.77                                         | 392                 | 30                                           | 3669                               |                                   |                                         | 768                                            | 509                      | 1.03                           | 524.27                         |                    |                                     | 836.06                          | -311.79                           | -1130.81                      | -1442.60 |
| 94               | 1975 | Mu Shouwen                        | 1               | middle-class peasant     | 14                    | 2                      | 1                     | 1                       | 7                              | 1                         | 1                         | 5                              | 64                                     |                           |                                  |                        | 616                                  |                                      |                                         |                                 | 35                                                    |                                          | 64                         | 39.6                                          | 2534                                           | 581                       | 0.57                                         | 331                 |                                              | 2866                               |                                   |                                         | 672                                            | 581                      | 1.01                           | 586.81                         |                    |                                     | 608.33                          | -21.52                            | 75.07                         | 53.55    |
| 95               | 1975 | Mu Zhaorui                        | 1               | middle-class peasant     | 14                    | 2                      | 1                     | 1                       | 3                              | 1                         |                           | 2                              | 26                                     |                           |                                  |                        | 628                                  |                                      |                                         |                                 | 35                                                    |                                          | 26                         | 39.6                                          | 1030                                           | 593                       | 0.57                                         | 338                 | 30                                           | 1398                               |                                   |                                         | 192                                            | 593                      | 1.01                           | 598.93                         |                    |                                     | 414.95                          | 183.98                            | 548.27                        | 732.25   |
| 96               | 1975 | Zhang Lirong                      | 2               | middle-class peasant     | 24                    | 3                      | 2                     | 1                       | 8                              | 1                         | 1                         | 6                              | 74                                     |                           |                                  |                        | 1114                                 |                                      |                                         |                                 | 60                                                    |                                          | 74                         | 39.6                                          | 2741                                           | 1054                      | 0.77                                         | 812                 |                                              | 3553                               |                                   |                                         | 576                                            | 1054                     | 1.03                           | 1085.62                        | 1.41               |                                     | 859.64                          | 227.39                            | 601.99                        | 829.38   |
| 97               | 1975 | Cui Yongfu                        | 1               | poor peasant             | 12.5                  | 2                      | 1                     | 1                       | 4                              |                           |                           | 4                              | 40                                     |                           |                                  |                        | 679                                  |                                      |                                         |                                 | 31                                                    |                                          | 40                         | 39.6                                          | 1584                                           | 648                       | 0.57                                         | 369                 |                                              | 1953                               |                                   |                                         | 384                                            | 648                      | 1.01                           | 654.48                         |                    |                                     | 819.87                          | -165.39                           | 392.05                        | 226.66   |
| 98               | 1975 | Meng Lanying                      | 1               | poor peasant             |                       | 0                      |                       |                         | 0                              |                           |                           |                                | 0                                      |                           |                                  |                        |                                      |                                      |                                         |                                 |                                                       | 0                                        | 39.6                       | 0                                             | 0                                              | 0.57                      | 0                                            |                     | 0                                            |                                    | 0                                 |                                         | 0                                              | 1.01                     | 0.00                           | 370.00                         | 9.45               | 360.55                              | -527.31                         | -166.76                           |                               |          |
| 99               | 1975 | Cui Yiren                         | 1               | poor peasant             | 14                    | 2                      | 1                     | 1                       | 6                              | 1                         | 2                         | 3                              | 52                                     |                           |                                  |                        | 633                                  |                                      |                                         |                                 | 35                                                    |                                          | 52                         | 39.6                                          | 2059                                           | 598                       | 0.57                                         | 341                 |                                              | 2400                               |                                   |                                         | 480                                            | 598                      | 1.01                           | 603.98                         | 91.78              |                                     | 574.20                          | 121.56                            | -89.12                        | 32.44    |
| 100              | 1975 | Wang Qingde                       | 1               | low-middle-class peasant |                       |                        |                       |                         | 1                              |                           |                           | 1                              | 10                                     |                           |                                  |                        | 320                                  |                                      |                                         |                                 |                                                       | 10                                       | 39.6                       | 396                                           | 320                                            | 0.57                      | 182                                          |                     | 578                                          |                                    |                                   | 96                                      | 320                                            | 1.01                     | 323.20                         |                                |                    | 258.69                              | 64.51                           | 551.32                            | 615.83                        |          |
| 101              | 1975 | Jin Lianyu                        | 1               | poor peasant             |                       | 0                      |                       |                         | 1                              |                           |                           | 1                              | 10                                     |                           |                                  |                        |                                      |                                      |                                         |                                 |                                                       | 10                                       | 39.6                       | 396                                           | 0                                              | 0.57                      | 0                                            | 30                  | 426                                          |                                    |                                   | 96                                      | 0                                              | 1.01                     | 0.00                           |                                |                    | 105.55                              | -105.55                         | -109.19                           | -214.74                       |          |
| 102              | 1975 | Wang Qiyi                         | 1               | poor peasant             | 8                     | 1                      | 1                     | 0                       | 1                              |                           |                           | 1                              | 10                                     |                           |                                  |                        | 344                                  |                                      |                                         |                                 | 20                                                    |                                          | 10                         | 39.6                                          | 396                                            | 324                       | 0.57                                         | 185                 |                                              | 581                                |                                   |                                         | 96                                             | 324                      | 1.01                           | 327.24                         |                    |                                     | 255.92                          | 71.32                             | 425.01                        | 496.33   |
| 103              | 1975 | Yang Chengye                      | 1               | poor peasant             |                       | 0                      |                       |                         | 1                              |                           |                           | 1                              | 10                                     |                           |                                  |                        | 104                                  |                                      |                                         |                                 |                                                       | 10                                       | 39.6                       | 396                                           | 104                                            | 0.57                      | 59                                           |                     | 455                                          |                                    |                                   | 96                                      | 104                                            | 1.01                     | 105.04                         |                                |                    | 104.01                              | 1.03                            | 134.61                            | 135.64                        |          |
| 104              | 1975 | Meng Mingjian                     | 1               | poor peasant             | 18                    | 2                      | 2                     | 0                       | 5                              |                           | 1                         | 4                              | 48                                     |                           |                                  |                        | 759                                  |                                      |                                         |                                 | 45                                                    |                                          | 48                         | 39.6                                          | 1901                                           | 714                       | 0.57                                         | 407                 |                                              | 2308                               |                                   |                                         | 480                                            | 714                      | 1.01                           | 721.14                         |                    |                                     | 540.56                          | 180.58                            | 6.74                          | 187.32   |
| 105              | 1975 | Guo Yuexiang                      | 1               | poor peasant             | 4                     | 1                      | 0                     | 1                       | 6                              |                           | 1                         | 5                              | 58                                     |                           |                                  |                        | 369                                  |                                      |                                         |                                 | 10                                                    |                                          | 58                         | 39.6                                          | 2297                                           | 359                       | 0.57                                         | 205                 |                                              | 2501                               |                                   |                                         | 576                                            | 359                      | 1.01                           | 362.59                         | 40.00              |                                     | 409.51                          | -6.92                             | 124.04                        | 117.12   |
| 106              | 1975 | Wu Congchao                       | 2               | poor peasant             | 18                    | 3                      | 1                     | 2                       | 7                              |                           | 1                         | 6                              | 68                                     |                           |                                  |                        | 980                                  |                                      |                                         |                                 | 45                                                    |                                          | 68                         | 39.6                                          | 2693                                           | 935                       | 0.77                                         | 720                 |                                              | 3413                               |                                   |                                         | 672                                            | 935                      | 1.03                           | 963.05                         | 0.47               |                                     | 733.55                          | 229.97                            | -498.75                       | -268.78  |
| 107              | 1975 | Xie Yuzhen                        | 2               | poor peasant             |                       | 0                      |                       |                         | 0                              |                           |                           |                                | 0                                      |                           |                                  |                        |                                      |                                      |                                         |                                 |                                                       | 0                                        | 39.6                       | 0                                             | 0                                              | 0.77                      | 0                                            |                     | 0                                            |                                    | 0                                 |                                         | 0                                              | 1.03                     | 0.00                           |                                |                    | 0.00                                |                                 | 0.00                              |                               |          |
| 108              | 1975 | Wu Songlin                        | 2               | poor peasant             |                       | 0                      |                       |                         | 0                              |                           |                           |                                | 0                                      |                           |                                  |                        |                                      |                                      |                                         |                                 |                                                       | 0                                        | 39.6                       | 0                                             | 0                                              | 0.77                      | 0                                            |                     | 0                                            |                                    | 0                                 |                                         | 0                                              | 1.03                     | 0.00                           |                                |                    | 0.00                                |                                 | 0.00                              |                               |          |
| 109              | 1975 | Yang Chunmei                      | 2               | poor peasant             | 14                    | 2                      | 1                     | 1                       | 6                              | 1                         |                           | 5                              | 56                                     |                           |                                  |                        | 532                                  |                                      |                                         |                                 | 35                                                    |                                          | 56                         | 39.6                                          | 2178                                           | 497                       | 0.77                                         | 383                 |                                              | 2561                               |                                   |                                         | 480                                            | 497                      | 1.03                           | 511.91                         | 115.00             |                                     | 484.78                          | 142.13                            | -400.20                       | -258.07  |
| 110              | 1975 | Wu Yulan                          | 2               | poor peasant             | 4                     | 1                      | 0                     | 1                       | 6                              | 1                         | 1                         | 4                              | 54                                     |                           |                                  |                        | 378                                  |                                      |                                         |                                 | 10                                                    |                                          | 54                         | 39.6                                          | 2138                                           | 368                       | 0.77                                         | 283                 |                                              | 2422                               |                                   |                                         | 480                                            | 368                      | 1.03                           | 379.04                         | 60.00              |                                     | 401.47                          | 37.57                             | 8.95                          | 46.52    |
| 111              | 1975 | Hua Suzhen                        | 1               | poor peasant             |                       | 0                      |                       |                         | 1                              |                           |                           | 1                              | 10                                     |                           |                                  |                        | 69                                   |                                      |                                         |                                 |                                                       | 10                                       | 39.6                       | 396                                           | 69                                             | 0.57                      | 39                                           |                     | 435                                          |                                    |                                   | 192                                     | 69                                             | 1.01                     | 69.69                          | 0.15                           |                    | 132.59                              | -62.75                          | 121.55                            | 58.80                         |          |
| 112              | 1975 | Song Liangxiang                   | 2               | poor peasant             | 4                     | 1                      | 0                     | 1                       | 2                              | 1                         |                           | 1                              | 16                                     |                           |                                  |                        | 141                                  |                                      |                                         |                                 | 10                                                    |                                          | 16                         | 39.6                                          | 634                                            | 131                       | 0.77                                         | 101                 |                                              | 734                                |                                   |                                         | 96                                             | 131                      | 1.03                           | 134.93                         | 0.05               |                                     | 111.45                          | 23.53                             | 118.77                        | 142.30   |
| 113              | 1975 | Zhang Dongde                      | 1               | poor peasant             | 4                     | 1                      | 0                     | 1                       | 3                              |                           |                           | 3                              | 30                                     |                           |                                  |                        | 447                                  |                                      |                                         |                                 | 10                                                    |                                          | 30                         | 39.6                                          | 1188                                           | 437                       | 0.57                                         | 249                 |                                              | 1437                               |                                   |                                         | 288                                            | 437                      | 1.01                           | 441.37                         |                    |                                     | 368.98                          | 72.39                             | 403.71                        | 476.10   |
| 114              | 1975 | Zhang Zhenyuan                    | 2               | poor peasant             | 14                    | 2                      | 1                     | 1                       | 5                              | 1                         | 1                         | 3                              | 44                                     |                           |                                  |                        | 524                                  |                                      |                                         |                                 | 35                                                    |                                          | 44                         | 39.6                                          | 1742                                           | 489                       | 0.77                                         | 377                 | 30                                           | 2149                               |                                   |                                         | 384                                            | 489                      | 1.03                           | 593.67                         | 0.09               |                                     | 511.28                          | -7.52                             | 199.72                        | 192.20   |
| 115              | 1975 | Meng Qingyun                      | 2               | poor peasant             |                       | 0                      |                       |                         | 1                              |                           |                           | 1                              | 10                                     |                           |                                  |                        | 325                                  |                                      |                                         |                                 |                                                       | 10                                       | 39.6                       | 396                                           | 325                                            | 0.77                      | 250                                          |                     | 646                                          |                                    |                                   | 96                                      | 325                                            | 1.03                     | 334.75                         |                                |                    | 242.13                              | 92.62                           | 648.28                            | 740.90                        |          |
| 116              | 1975 | Zhao Hongsheng                    | 1               | low-middle-class peasant | 38                    | 5                      | 3                     | 2                       | 8                              | 1                         |                           | 7                              | 76                                     |                           |                                  |                        | 1595                                 |                                      |                                         |                                 | 95                                                    |                                          | 76                         | 39.6                                          | 3010                                           | 1500                      | 0.57                                         | 855                 | 30                                           | 3895                               |                                   |                                         | 672                                            | 1500                     | 1.01                           | 1515.00                        | 2.88               |                                     | 1040.51                         | 477.37                            | 350.18                        | 827.55   |
| 117              | 1975 | Meng Mingyou                      | 2               | poor peasant             | 10                    | 1                      | 1                     | 0                       | 1                              |                           |                           | 1                              | 10                                     |                           |                                  |                        | 276                                  |                                      |                                         |                                 | 25                                                    |                                          | 10                         | 39.6                                          | 396                                            | 251                       | 0.77                                         | 193                 |                                              | 589                                |                                   |                                         | 96                                             | 251                      | 1.03                           | 258.53                         |                    |                                     | 233.62                          | 24.91                             | 544.55                        | 569.46   |
| 118              | 1975 | Xu Peishi                         | 1               | poor peasant             | 20.5                  | 3                      | 2                     | 1                       | 5                              |                           |                           | 5                              | 50                                     |                           |                                  |                        | 678                                  |                                      |                                         |                                 | 51                                                    |                                          | 50                         | 39.6                                          | 1980                                           | 627                       | 0.57                                         | 357                 |                                              | 2337                               |                                   |                                         | 576                                            | 627                      | 1.01                           | 633.27                         |                    |                                     | 553.08                          | 80.19                             | -723.92                       | -643.73  |

(cont.)

| Household number | Year | Name of the head of the household | Production team | Class status (1)         | Basic work points (2) | Total labor forces (3) | Male labor forces (4) | Female labor forces (5) | Total household population (6) | Age: 1 to 3 years old (7) | Age: 4 to 7 years old (8) | Age: 8 years old and above (9) | Work points of grain distribution (10) | Laboring work points (11) | Farmyard manure work points (12) | Total work points (13) | Work points of compulsory labor (14) | Work points of help cultivation (15) | Work points of private plots labor (16) | Total deducted work points (17) | Actual workdays of participation in distribution (18) | Workpoints for rations distribution (19) | Rations per workpoint (20) | Total rations received from distribution (21) | Workdays of participation in distribution (22) | Grains per workpoint (23) | Total grains distributed by work-points (24) | Grains subsidy (25) | Total Grains received from distribution (26) | Distributed grains per person (27) | Distributed grains per adult (28) | Grains received from private plots (29) | Workdays of participation in distribution (30) | Value per workpoint (31) | Total value of workpoints (32) | Money used for investment (33) | Sum of income (34) | Money distributed in this year (34) | Deposit/debt of this year (35) | Deposit/debt over the years (36) | Accumulated deposit/debt (37) |
|------------------|------|-----------------------------------|-----------------|--------------------------|-----------------------|------------------------|-----------------------|-------------------------|--------------------------------|---------------------------|---------------------------|--------------------------------|----------------------------------------|---------------------------|----------------------------------|------------------------|--------------------------------------|--------------------------------------|-----------------------------------------|---------------------------------|-------------------------------------------------------|------------------------------------------|----------------------------|-----------------------------------------------|------------------------------------------------|---------------------------|----------------------------------------------|---------------------|----------------------------------------------|------------------------------------|-----------------------------------|-----------------------------------------|------------------------------------------------|--------------------------|--------------------------------|--------------------------------|--------------------|-------------------------------------|--------------------------------|----------------------------------|-------------------------------|
| 119              | 1975 | Wang Qingchang                    | 2               | poor peasant             | 14                    | 2                      | 1                     | 1                       | 4                              |                           |                           | 4                              | 40                                     |                           |                                  |                        | 690                                  |                                      |                                         |                                 | 35                                                    |                                          | 40                         | 39.6                                          | 1584                                           | 655                       | 0.77                                         | 504                 |                                              | 2088                               |                                   | 384                                     | 655                                            | 1.03                     | 674.65                         | 13.37                          | 823.23             | -135.21                             | 668.39                         | 533.18                           |                               |
| 120              | 1975 | Wang Qinghai                      | 2               | poor peasant             | 14                    | 2                      | 1                     | 1                       | 10                             |                           | 1                         | 9                              | 98                                     |                           |                                  |                        | 881                                  |                                      |                                         |                                 | 35                                                    |                                          | 98                         | 39.6                                          | 3881                                           | 846                       | 0.77                                         | 651                 | 30                                           | 4562                               |                                   | 960                                     | 846                                            | 1.03                     | 871.38                         | 420.00                         | 822.57             | 468.81                              | -662.42                        | -193.61                          |                               |
| 121              | 1975 | Cao Desheng                       | 2               | poor peasant             |                       | 0                      |                       |                         | 0                              |                           |                           |                                | 0                                      |                           |                                  | 79                     |                                      |                                      |                                         |                                 |                                                       | 0                                        | 39.6                       | 33                                            | 79                                             | 0.77                      | 61                                           |                     | 94                                           |                                    | 96                                | 79                                      | 1.03                                           | 81.37                    | 0.47                           | 182.37                         | -100.53            | 131.28                              | 30.75                          |                                  |                               |
| 122              | 1975 | Ma Yuying                         | 2               | poor peasant             |                       | 0                      |                       |                         | 2                              |                           |                           | 2                              | 20                                     |                           |                                  | 7                      |                                      |                                      |                                         |                                 |                                                       | 20                                       | 39.6                       | 792                                           | 7                                              | 0.77                      | 5                                            |                     | 797                                          |                                    | 192                               | 7                                       | 1.03                                           | 7.21                     | 90.00                          | 132.03                         | -34.82             | -296.65                             | -331.47                        |                                  |                               |
| 123              | 1975 | Liu Peizhen                       | 1               | poor peasant             |                       | 0                      |                       |                         | 0                              |                           |                           |                                | 0                                      |                           |                                  |                        |                                      |                                      |                                         |                                 |                                                       | 0                                        | 39.6                       | 0                                             | 0                                              | 0.57                      | 0                                            |                     | 0                                            |                                    | 0                                 | 0                                       | 1.03                                           | 0.00                     | 541.64                         |                                | 541.64             | -541.64                             | 0.00                           |                                  |                               |
| 124              | 1975 | Liu Dahai                         | 2               | middle-class peasant     | 16.5                  | 3                      | 1                     | 2                       | 6                              | 2                         | 1                         | 3                              | 50                                     |                           |                                  |                        | 775                                  |                                      |                                         |                                 | 41                                                    |                                          | 50                         | 39.6                                          | 1930                                           | 734                       | 0.77                                         | 565                 | 30                                           | 3097                               |                                   | 384                                     | 734                                            | 1.03                     | 756.02                         |                                | 607.38             | 148.64                              | 425.20                         | 573.84                           |                               |
| 125              | 1975 | Liu Ercan                         | 2               | middle-class peasant     |                       | 0                      |                       |                         | 2                              |                           |                           | 2                              | 20                                     |                           |                                  |                        | 16                                   |                                      |                                         |                                 |                                                       | 20                                       | 39.6                       | 792                                           | 16                                             | 0.77                      | 12                                           |                     | 804                                          |                                    | 192                               | 16                                      | 1.03                                           | 16.48                    |                                | 178.18                         | -161.70            | -1087.82                            | -1249.52                       |                                  |                               |
| 126              | 1975 | Wu Jingxiang                      | 2               | low-middle-class peasant | 4                     | 1                      | 0                     | 1                       | 2                              |                           | 1                         | 1                              | 18                                     |                           |                                  |                        | 30                                   |                                      |                                         |                                 | 10                                                    |                                          | 18                         | 39.6                                          | 713                                            | 20                        | 0.77                                         | 15                  |                                              | 728                                |                                   | 192                                     | 20                                             | 1.03                     | 20.60                          |                                | 158.90             | -138.30                             | -232.87                        | -371.17                          |                               |
| 127              | 1975 | Zhang Hengde                      | 2               | poor peasant             | 20.5                  | 4                      | 1                     | 3                       | 7                              |                           |                           | 7                              | 70                                     |                           |                                  |                        | 1256                                 |                                      |                                         |                                 | 51                                                    |                                          | 70                         | 39.6                                          | 2772                                           | 1205                      | 0.77                                         | 928                 | 30                                           | 3730                               |                                   | 672                                     | 1205                                           | 1.03                     | 1241.15                        |                                | 1002.96            | 238.19                              | 1203.20                        | 1441.39                          |                               |
| 128              | 1975 | Zhang Hengde                      | 2               | poor peasant             | 8                     | 1                      | 1                     | 0                       | 1                              |                           |                           | 1                              | 10                                     |                           |                                  |                        | 297                                  |                                      |                                         |                                 | 20                                                    |                                          | 10                         | 39.6                                          | 396                                            | 277                       | 0.77                                         | 213                 |                                              | 609                                |                                   | 96                                      | 277                                            | 1.03                     | 285.31                         |                                | 238.32             | 46.99                               | 423.99                         | 470.98                           |                               |
| 129              | 1975 | Wei Zhaoxiang                     | 2               | low-middle-class peasant | 14                    | 2                      | 1                     | 1                       | 4                              | 1                         |                           | 3                              | 36                                     |                           |                                  |                        | 543                                  |                                      |                                         |                                 | 35                                                    |                                          | 36                         | 39.6                                          | 1426                                           | 508                       | 0.77                                         | 391                 | 30                                           | 1847                               |                                   | 288                                     | 508                                            | 1.03                     | 523.24                         | 5.46                           | 473.17             | 55.53                               | 132.33                         | 187.86                           |                               |
| 130              | 1975 | Mu Zhaoren                        | 2               | poor peasant             | 24                    | 3                      | 2                     | 1                       | 7                              |                           | 1                         | 6                              | 68                                     |                           |                                  |                        | 956                                  |                                      |                                         |                                 | 60                                                    |                                          | 68                         | 39.6                                          | 2693                                           | 896                       | 0.77                                         | 690                 |                                              | 3383                               |                                   | 672                                     | 896                                            | 1.03                     | 922.88                         | 0.09                           | 745.95             | 177.02                              | -173.74                        | 3.28                             |                               |
| 131              | 1975 | Li Shiyong                        | 2               | poor peasant             |                       | 0                      |                       |                         | 2                              |                           |                           | 2                              | 20                                     |                           |                                  |                        | 282                                  |                                      |                                         |                                 |                                                       | 20                                       | 39.6                       | 792                                           | 282                                            | 0.77                      | 217                                          |                     | 1009                                         |                                    | 192                               | 282                                     | 1.03                                           | 290.46                   |                                | 217.93                         | 72.53              | 224.16                              | 296.69                         |                                  |                               |
| 132              | 1975 | Wu Jinggui                        | 1               | low-middle-class peasant | 28.5                  | 5                      | 2                     | 3                       | 9                              | 2                         |                           | 7                              | 82                                     |                           |                                  |                        | 1119                                 |                                      |                                         |                                 | 71                                                    |                                          | 82                         | 39.6                                          | 3227                                           | 1048                      | 0.57                                         | 597                 |                                              | 3824                               |                                   | 768                                     | 1048                                           | 1.01                     | 1058.48                        | 2.47                           | 1375.65            | -314.70                             | 1223.12                        | 908.42                           |                               |
| 133              | 1975 | Wu Jingfang                       | 2               | middle-class peasant     | 14                    | 2                      | 1                     | 1                       | 7                              |                           | 2                         | 5                              | 66                                     |                           |                                  |                        | 381                                  |                                      |                                         |                                 | 35                                                    |                                          | 66                         | 39.6                                          | 2614                                           | 346                       | 0.77                                         | 266                 |                                              | 2880                               |                                   | 768                                     | 346                                            | 1.03                     | 356.38                         |                                | 606.59             | -250.21                             | -1311.53                       | -1561.74                         |                               |
| 134              | 1975 | Wu Jingyu                         | 2               | low-middle-class peasant | 24                    | 3                      | 2                     | 1                       | 6                              |                           | 1                         | 5                              | 58                                     |                           |                                  |                        | 1120                                 |                                      |                                         |                                 | 60                                                    |                                          | 58                         | 39.6                                          | 2297                                           | 1060                      | 0.77                                         | 816                 |                                              | 3113                               |                                   | 576                                     | 1060                                           | 1.03                     | 1091.80                        | 7.62                           | 929.80             | 169.62                              | 627.91                         | 797.53                           |                               |
| 135              | 1975 | Wu Jinghua                        | 2               | low-middle-class peasant | 24                    | 3                      | 2                     | 1                       | 5                              |                           |                           | 5                              | 50                                     |                           |                                  |                        | 1028                                 |                                      |                                         |                                 | 60                                                    |                                          | 50                         | 39.6                                          | 1980                                           | 968                       | 0.77                                         | 745                 |                                              | 2725                               |                                   | 480                                     | 968                                            | 1.03                     | 997.04                         |                                | 1115.16            | -118.12                             | 518.91                         | 400.79                           |                               |
| 136              | 1975 | Wu Changbiao                      | 2               | middle-class peasant     |                       | 0                      |                       |                         | 1                              |                           |                           | 1                              | 10                                     |                           |                                  |                        | 243                                  |                                      |                                         |                                 |                                                       | 10                                       | 39.6                       | 396                                           | 243                                            | 0.77                      | 187                                          |                     | 583                                          |                                    | 96                                | 243                                     | 1.03                                           | 250.29                   |                                | 207.10                         | 43.19              | 199.45                              | 242.64                         |                                  |                               |
| 137              | 1975 | Wu Jingnan                        | 2               | middle-class peasant     | 14                    | 2                      | 1                     | 1                       | 8                              | 1                         | 1                         | 6                              | 74                                     |                           |                                  |                        | 647                                  |                                      |                                         |                                 | 10                                                    |                                          | 74                         | 39.6                                          | 2930                                           | 637                       | 0.77                                         | 490                 |                                              | 3421                               |                                   | 576                                     | 637                                            | 1.03                     | 656.11                         | 1.55                           | 788.45             | -130.79                             | -321.43                        | -452.22                          |                               |
| 138              | 1975 | Wu Jing'an                        | 2               | middle-class peasant     | 10                    | 1                      | 1                     | 0                       | 2                              |                           |                           | 2                              | 20                                     |                           |                                  |                        | 414                                  |                                      |                                         |                                 | 25                                                    |                                          | 20                         | 39.6                                          | 792                                            | 389                       | 0.77                                         | 300                 |                                              | 1092                               |                                   | 288                                     | 389                                            | 1.03                     | 400.67                         |                                | 298.04             | 102.63                              | 31.10                          | 133.73                           |                               |

(cont.)

| Household number | Year | Name of the head of the household | Production team | Class status (1)           | Basic work points (2) | Total labor forces (3) | Male labor forces (4) | Female labor forces (5) | Total household population (6) | Age: 1 to 3 years old (7) | Age: 4 to 7 years old (8) | Age: 8 years old and above (9) | Work points of grain distribution (10) | Laboring work points (11) | Farmyard manure work points (12) | Total work points (13) | Work points of compulsory labor (14) | Work points of help cultivation (15) | Work points of private plots labor (16) | Total deducted work points (17) | Actual workdays of participation in distribution (18) | Workpoints for rations distribution (19) | Rations per workpoint (20) | Total rations received from distribution (21) | Workdays of participation in distribution (22) | Grains per workpoint (23) | Total grains distributed by work-points (24) | Grains subsidy (25) | Total Grains received from distribution (26) | Distributed grains per person (27) | Distributed grains per adult (28) | Grains received from private plots (29) | Workdays of participation in distribution (30) | Value per workpoint (31) | Total value of workpoints (32) | Money used for investment (33) | Sum of income (34) | Money distributed in this year (34) | Deposit/ debt of this year (35) | Deposit/ debt over the years (36) | Accumulated deposit/debt (37) |
|------------------|------|-----------------------------------|-----------------|----------------------------|-----------------------|------------------------|-----------------------|-------------------------|--------------------------------|---------------------------|---------------------------|--------------------------------|----------------------------------------|---------------------------|----------------------------------|------------------------|--------------------------------------|--------------------------------------|-----------------------------------------|---------------------------------|-------------------------------------------------------|------------------------------------------|----------------------------|-----------------------------------------------|------------------------------------------------|---------------------------|----------------------------------------------|---------------------|----------------------------------------------|------------------------------------|-----------------------------------|-----------------------------------------|------------------------------------------------|--------------------------|--------------------------------|--------------------------------|--------------------|-------------------------------------|---------------------------------|-----------------------------------|-------------------------------|
| 139              | 1975 | Wu Jinghui                        | 2               | middle-class peasant       | 14                    | 2                      | 1                     | 1                       | 6                              | 1                         | 1                         | 4                              | 54                                     |                           |                                  | 602                    |                                      |                                      |                                         | 35                              |                                                       | 54                                       | 39.6                       | 2138                                          | 567                                            | 0.77                      | 437                                          | 30                  | 2605                                         |                                    | 480                               | 567                                     | 1.03                                           | 584.01                   | 0.94                           | 597.12                         | -12.17             | 290.51                              | 278.34                          |                                   |                               |
| 140              | 1975 | Wu Jingying                       | 2               | middle-class peasant       | 18                    | 3                      | 1                     | 2                       | 9                              | 1                         | 1                         | 7                              | 84                                     |                           |                                  | 897                    |                                      |                                      |                                         | 45                              |                                                       | 84                                       | 39.6                       | 3326                                          | 852                                            | 0.77                      | 656                                          |                     | 3982                                         |                                    | 768                               | 852                                     | 1.03                                           | 877.56                   | 250.00                         | 764.07                         | 363.49             | -441.77                             | -78.28                          |                                   |                               |
| 141              | 1975 | Wu Jingfu                         | 2               | middle-class peasant       | 14                    | 2                      | 1                     | 1                       | 6                              | 1                         | 1                         | 4                              | 54                                     |                           |                                  | 633                    |                                      |                                      |                                         | 35                              |                                                       | 54                                       | 39.6                       | 2138                                          | 598                                            | 0.77                      | 460                                          |                     | 2599                                         |                                    | 480                               | 598                                     | 1.03                                           | 615.94                   |                                | 595.86                         | 20.08              | -267.02                             | -246.94                         |                                   |                               |
| 142              | 1975 | Meng Dongmei                      | 2               | low-middle-class peasant   | 4                     | 1                      | 0                     | 1                       | 5                              | 1                         | 1                         | 3                              | 44                                     |                           |                                  | 98                     |                                      |                                      |                                         | 10                              |                                                       | 44                                       | 39.6                       | 1742                                          | 88                                             | 0.77                      | 68                                           |                     | 1810                                         |                                    | 384                               | 88                                      | 1.03                                           | 90.64                    | 250.00                         | 291.57                         | 49.07              | -122.64                             | -73.57                          |                                   |                               |
| 143              | 1975 | Mneg Tianyu                       | 2               | poor peasant               | 20.5                  | 3                      | 2                     | 1                       | 5                              |                           |                           | 5                              | 50                                     |                           |                                  | 809                    |                                      |                                      |                                         | 51                              |                                                       | 50                                       | 39.6                       | 1980                                          | 758                                            | 0.77                      | 584                                          |                     | 2564                                         |                                    | 480                               | 758                                     | 1.03                                           | 780.74                   |                                | 698.05                         | 82.69              | 696.82                              | 779.51                          |                                   |                               |
| 144              | 1975 | Xue Lanying                       | 2               | middle-class peasant       |                       | 0                      |                       |                         | 0                              |                           |                           |                                | 0                                      |                           |                                  |                        |                                      |                                      |                                         | 0                               |                                                       | 0                                        | 39.6                       | 0                                             | 0                                              | 0.77                      | 0                                            |                     | 0                                            |                                    | 0                                 | 0                                       | 1.03                                           | 0.00                     |                                |                                | 0.00               | 0.00                                |                                 |                                   |                               |
| 145              | 1975 | Wang Shufu                        | 2               | poor peasant               | 14                    | 2                      | 1                     | 1                       | 3                              |                           | 1                         | 2                              | 28                                     |                           |                                  | 551                    |                                      |                                      |                                         | 35                              |                                                       | 28                                       | 39.6                       | 1199                                          | 516                                            | 0.77                      | 397                                          |                     | 1596                                         |                                    | 288                               | 516                                     | 1.03                                           | 531.48                   |                                | 553.91                         | -22.43             | 479.72                              | 457.29                          |                                   |                               |
| 146              | 1975 | Li Changsheng                     | 2               | poor peasant               | 14                    | 2                      | 1                     | 1                       | 6                              |                           | 1                         | 5                              | 58                                     |                           |                                  | 651                    |                                      |                                      |                                         | 10                              |                                                       | 58                                       | 39.6                       | 2297                                          | 641                                            | 0.77                      | 494                                          |                     | 2790                                         |                                    | 672                               | 641                                     | 1.03                                           | 660.23                   |                                | 644.43                         | 15.80              | 386.13                              | 401.93                          |                                   |                               |
| 147              | 1975 | Zhang Yongqing                    | 2               | poor peasant               |                       | 0                      |                       |                         | 1                              |                           |                           | 1                              | 10                                     |                           |                                  | 229                    |                                      |                                      |                                         |                                 |                                                       | 10                                       | 39.6                       | 396                                           | 229                                            | 0.77                      | 176                                          |                     | 572                                          |                                    | 96                                | 229                                     | 1.03                                           | 235.87                   | 0.27                           | 212.82                         | 23.32              | 516.47                              | 539.79                          |                                   |                               |
| 148              | 1975 | Wang Suzhen                       | 2               | poor peasant               |                       | 0                      |                       |                         | 1                              |                           |                           | 1                              | 10                                     |                           |                                  |                        |                                      |                                      |                                         |                                 |                                                       | 10                                       | 39.6                       | 396                                           | 0                                              | 0.77                      | 0                                            |                     | 396                                          |                                    | 96                                | 0                                       | 1.03                                           | 0.00                     |                                | 55.37                          | -55.37             | -666.22                             | -721.59                         |                                   |                               |
| 149              | 1975 | Liu Chunxiang                     | 2               | upper-middle-class peasant | 28.5                  | 5                      | 2                     | 3                       | 6                              | 1                         |                           | 5                              | 56                                     |                           |                                  | 1269                   |                                      |                                      |                                         | 71                              |                                                       | 56                                       | 39.6                       | 2108                                          | 1198                                           | 0.77                      | 922                                          |                     | 3030                                         |                                    | 384                               | 1198                                    | 1.03                                           | 1233.94                  | 0.15                           | 856.49                         | 377.60             | 1322.47                             | 1700.07                         |                                   |                               |
| 150              | 1975 | Liu Chunyou                       | 2               | low-middle-class peasant   | 14                    | 2                      | 1                     | 1                       | 6                              | 1                         | 2                         | 3                              | 52                                     |                           |                                  | 901                    |                                      |                                      |                                         | 35                              |                                                       | 52                                       | 39.6                       | 2059                                          | 866                                            | 0.77                      | 667                                          |                     | 2726                                         |                                    | 480                               | 866                                     | 1.03                                           | 891.98                   | 14.33                          | 1087.45                        | -181.14            | 967.99                              | 786.85                          |                                   |                               |
| 151              | 1975 | Wang Kaitai                       | 2               | middle-class peasant       | 14                    | 2                      | 1                     | 1                       | 7                              | 2                         | 1                         | 4                              | 60                                     |                           |                                  | 464                    |                                      |                                      |                                         | 35                              |                                                       | 60                                       | 39.6                       | 2376                                          | 429                                            | 0.77                      | 330                                          |                     | 2706                                         |                                    | 480                               | 429                                     | 1.03                                           | 441.87                   |                                | 536.24                         | -94.37             | -205.08                             | -299.45                         |                                   |                               |
| 152              | 1975 | Meng Minghuan                     | 2               | middle-class peasant       |                       | 0                      |                       |                         | 2                              |                           |                           | 2                              | 20                                     |                           |                                  | 41                     |                                      |                                      |                                         |                                 |                                                       | 20                                       | 39.6                       | 792                                           | 41                                             | 0.77                      | 32                                           |                     | 824                                          |                                    | 192                               | 41                                      | 1.03                                           | 42.23                    | 372.00                         | 162.49                         | 251.74             | -363.46                             | -111.72                         |                                   |                               |
| 153              | 1975 | Meng Qingfu                       | 2               | middle-class peasant       | 10                    | 1                      | 1                     | 0                       | 1                              |                           |                           | 1                              | 10                                     |                           |                                  | 664                    |                                      |                                      |                                         | 25                              |                                                       | 10                                       | 39.6                       | 396                                           | 639                                            | 0.77                      | 492                                          |                     | 888                                          |                                    | 96                                | 639                                     | 1.03                                           | 658.17                   | 0.76                           | 474.22                         | 184.71             | 691.15                              | 875.86                          |                                   |                               |
| 154              | 1975 | Mneg Qingsheng                    | 2               | middle-class peasant       | 10                    | 1                      | 1                     | 0                       | 1                              |                           |                           | 1                              | 10                                     |                           |                                  | 480                    |                                      |                                      |                                         | 25                              |                                                       | 10                                       | 39.6                       | 396                                           | 455                                            | 0.77                      | 350                                          |                     | 746                                          |                                    | 96                                | 455                                     | 1.03                                           | 468.65                   |                                | 489.16                         | -20.51             | 671.55                              | 651.04                          |                                   |                               |
| 155              | 1975 | Meng Qingbao                      | 2               | middle-class peasant       | 10                    | 1                      | 1                     | 0                       | 2                              |                           |                           | 2                              | 20                                     |                           |                                  | 475                    |                                      |                                      |                                         | 25                              |                                                       | 20                                       | 39.6                       | 792                                           | 450                                            | 0.77                      | 347                                          |                     | 1139                                         |                                    | 192                               | 450                                     | 1.03                                           | 463.50                   |                                | 374.59                         | 88.91              | -138.29                             | -49.38                          |                                   |                               |
| 156              | 1975 | Cao Jincheng                      | 2               | poor peasant               | 10                    | 1                      | 1                     | 0                       | 1                              |                           |                           | 1                              | 10                                     |                           |                                  | 350                    |                                      |                                      |                                         | 25                              |                                                       | 10                                       | 39.6                       | 396                                           | 325                                            | 0.77                      | 250                                          |                     | 646                                          |                                    | 96                                | 325                                     | 1.03                                           | 334.75                   | 2.11                           | 466.18                         | -129.32            | 317.09                              | 187.77                          |                                   |                               |
| 157              | 1975 | Cao Jinwei                        | 2               | poor peasant               | 10                    | 1                      | 1                     | 0                       | 2                              |                           |                           | 2                              | 20                                     |                           |                                  | 461                    |                                      |                                      |                                         | 25                              |                                                       | 20                                       | 39.6                       | 792                                           | 436                                            | 0.77                      | 336                                          |                     | 1128                                         |                                    | 192                               | 436                                     | 1.03                                           | 449.08                   |                                | 346.70                         | 102.38             | 384.66                              | 487.04                          |                                   |                               |

(cont.)

| Household number | Year | Name of the head of the household | Production team | Class status (1)           | Basic work points (2) | Total labor forces (3) | Male labor forces (4) | Female labor forces (5) | Total household population (6) | Age: 1 to 3 years old (7) | Age: 4 to 7 years old (8) | Age: 8 years old and above (9) | Work points of grain distribution (10) | Laboring work points (11) | Farmyard manure work points (12) | Total work points (13) | Work points of compulsory labor (14) | Work points of help cultivation (15) | Work points of private plots labor (16) | Total deducted work points (17) | Actual workdays of participation in distribution (18) | Workpoints for rations distribution (19) | Rations per workpoint (20) | Total rations received from distribution (21) | Workdays of participation in distribution (22) | Grains per workpoint (23) | Total grains distributed by work-points (24) | Grains subsidy (25) | Total Grains received from distribution (26) | Distributed grains per person (27) | Distributed grains per adult (28) | Grains received from private plots (29) | Workdays of participation in distribution (30) | Value per workpoint (31) | Total value of workpoints (32) | Money used for investment (33) | Sum of income (34) | Money distributed in this year (34) | Deposit/debt of this year (35) | Deposit/debt over the years (36) | Accumulated deposit/debt (37) |          |
|------------------|------|-----------------------------------|-----------------|----------------------------|-----------------------|------------------------|-----------------------|-------------------------|--------------------------------|---------------------------|---------------------------|--------------------------------|----------------------------------------|---------------------------|----------------------------------|------------------------|--------------------------------------|--------------------------------------|-----------------------------------------|---------------------------------|-------------------------------------------------------|------------------------------------------|----------------------------|-----------------------------------------------|------------------------------------------------|---------------------------|----------------------------------------------|---------------------|----------------------------------------------|------------------------------------|-----------------------------------|-----------------------------------------|------------------------------------------------|--------------------------|--------------------------------|--------------------------------|--------------------|-------------------------------------|--------------------------------|----------------------------------|-------------------------------|----------|
| 158              | 1975 | Meng Tianlai                      | 1               | middle-class peasant       | 14                    | 2                      | 1                     | 1                       | 5                              | 1                         | 1                         | 3                              | 44                                     |                           |                                  |                        | 610                                  |                                      |                                         |                                 | 35                                                    |                                          | 44                         | 39.6                                          | 1742                                           | 575                       | 0.57                                         | 328                 | 30                                           | 2100                               |                                   |                                         | 384                                            | 575                      | 1.01                           | 580.75                         |                    |                                     | 537.88                         | 42.87                            | 424.59                        | 467.46   |
| 159              | 1975 | Yu Guiying                        | 1               | poor peasant               |                       | 0                      |                       |                         | 0                              |                           |                           |                                | 0                                      |                           |                                  |                        |                                      |                                      |                                         |                                 |                                                       | 0                                        | 39.6                       | 0                                             | 0                                              | 0.57                      | 0                                            |                     | 0                                            |                                    |                                   | 0                                       | 0                                              | 1.01                     | 0.00                           |                                |                    | 0.00                                |                                | 0.00                             |                               |          |
| 160              | 1975 | Liu Chunxiao                      | 2               | upper-middle-class peasant | 14                    | 2                      | 1                     | 1                       | 4                              | 1                         |                           | 3                              | 36                                     |                           |                                  |                        | 705                                  |                                      |                                         |                                 | 35                                                    |                                          | 36                         | 39.6                                          | 1426                                           | 670                       | 0.77                                         | 516                 | 30                                           | 1972                               |                                   |                                         | 288                                            | 670                      | 1.03                           | 690.10                         |                    |                                     | 485.53                         | 204.57                           | 377.44                        | 582.01   |
| 161              | 1975 | Meng Qinghua                      | 2               | low-middle-class peasant   | 8                     | 1                      | 1                     | 0                       | 1                              |                           |                           | 1                              | 10                                     |                           |                                  |                        | 150                                  |                                      |                                         |                                 | 20                                                    |                                          | 10                         | 39.6                                          | 396                                            | 130                       | 0.77                                         | 100                 |                                              | 496                                |                                   |                                         | 96                                             | 130                      | 1.03                           | 133.90                         |                    |                                     | 129.40                         | 4.50                             | 166.96                        | 171.46   |
| 162              | 1975 | Meng Peigui                       | 2               | rich peasant               | 24.5                  | 1                      | 0                     | 1                       | 1                              |                           |                           | 1                              | 10                                     |                           |                                  |                        | 100                                  |                                      |                                         |                                 | 6                                                     |                                          | 10                         | 39.6                                          | 396                                            | 94                        | 0.77                                         | 72                  |                                              | 468                                |                                   |                                         | 192                                            | 94                       | 1.03                           | 96.82                          |                    |                                     | 159.54                         | -62.72                           | 257.48                        | 194.76   |
| 163              | 1975 | Meng Peiji                        | 2               | rich peasant               | 24.5                  | 4                      | 2                     | 2                       | 7                              |                           |                           | 7                              | 70                                     |                           |                                  |                        | 1291                                 |                                      |                                         |                                 | 86                                                    |                                          | 70                         | 39.6                                          | 2772                                           | 1205                      | 0.77                                         | 928                 |                                              | 3700                               |                                   |                                         | 672                                            | 1205                     | 1.03                           | 1241.15                        |                    |                                     | 879.45                         | 361.70                           | 342.24                        | 703.94   |
| 164              | 1975 | Meng Jinghuan                     | 2               | upper-middle-class peasant | 4                     | 1                      | 0                     | 1                       | 4                              |                           | 1                         | 3                              | 38                                     |                           |                                  |                        | 338                                  |                                      |                                         |                                 | 10                                                    |                                          | 38                         | 39.6                                          | 1505                                           | 328                       | 0.77                                         | 253                 |                                              | 1757                               |                                   |                                         | 384                                            | 328                      | 1.03                           | 337.84                         | 0.47               |                                     | 299.16                         | 39.15                            | 137.16                        | 176.31   |
| 165              | 1975 | Lan Jinzhi                        | 1               | poor peasant               | 20.5                  | 3                      | 1                     | 2                       | 7                              |                           |                           | 7                              | 70                                     |                           |                                  |                        | 801                                  |                                      |                                         |                                 | 51                                                    |                                          | 70                         | 39.6                                          | 2772                                           | 750                       | 0.57                                         | 428                 |                                              | 3200                               |                                   |                                         | 672                                            | 750                      | 1.01                           | 757.50                         | 2.02               |                                     | 687.26                         | 72.26                            | 378.33                        | 450.59   |
| 166              | 1975 | Wang Jinshu                       | 2               | upper-middle-class peasant |                       | 0                      |                       |                         | 0                              |                           |                           |                                | 0                                      |                           |                                  |                        |                                      |                                      |                                         |                                 |                                                       | 0                                        | 39.6                       | 145                                           | 0                                              | 0.77                      | 0                                            |                     | 145                                          |                                    |                                   | 96                                      | 0                                              | 1.03                     | 0.00                           | 153.10                         |                    |                                     | 37.98                          | 115.12                           | -153.10                       | -37.98   |
| 167              | 1975 | Cao Xiangyun                      | 2               | upper-middle-class peasant |                       | 0                      |                       |                         | 0                              |                           |                           |                                | 0                                      |                           |                                  |                        |                                      |                                      |                                         |                                 |                                                       | 0                                        | 39.6                       | 0                                             | 0                                              | 0.77                      | 0                                            |                     | 0                                            |                                    |                                   | 0                                       | 0                                              | 1.03                     | 0.00                           |                                |                    | 0.00                                |                                | 0.00                             |                               |          |
| 168              | 1975 | Li Shibao                         | 2               | poor peasant               | 18                    | 3                      | 1                     | 2                       | 10                             | 1                         | 1                         | 8                              | 94                                     |                           |                                  |                        | 912                                  |                                      |                                         |                                 | 45                                                    |                                          | 94                         | 39.6                                          | 3652                                           | 867                       | 0.77                                         | 668                 |                                              | 4320                               |                                   |                                         | 864                                            | 867                      | 1.03                           | 893.01                         | 501.04             |                                     | 840.55                         | 553.50                           | -943.23                       | -389.73  |
| 169              | 1975 | Wang Kailu                        | 2               | poor peasant               | 22                    | 3                      | 2                     | 1                       | 5                              |                           |                           | 5                              | 50                                     |                           |                                  |                        | 1190                                 |                                      |                                         |                                 | 55                                                    |                                          | 50                         | 39.6                                          | 1980                                           | 1135                      | 0.77                                         | 874                 |                                              | 2854                               |                                   |                                         | 480                                            | 1135                     | 1.03                           | 1169.05                        |                    |                                     | 1183.45                        | -14.40                           | 573.09                        | 558.69   |
| 170              | 1975 | Zhao Hongrui                      | 1               | middle-class peasant       | 36.5                  | 5                      | 3                     | 2                       | 8                              |                           | 2                         | 6                              | 76                                     |                           |                                  |                        | 1543                                 |                                      |                                         |                                 | 91                                                    |                                          | 76                         | 39.6                                          | 3010                                           | 1452                      | 0.57                                         | 828                 | 30                                           | 3867                               |                                   |                                         | 864                                            | 1452                     | 1.01                           | 1466.52                        |                    |                                     | 1364.73                        | 101.79                           | 1331.05                       | 1432.84  |
| 171              | 1975 | Fang Chunxing                     | 0               | middle-class peasant       |                       | 0                      |                       |                         | 0                              |                           |                           |                                | 0                                      |                           |                                  |                        |                                      |                                      |                                         |                                 |                                                       | 0                                        | 39.6                       | 0                                             | 0                                              | 0.57                      | 0                                            |                     | 0                                            |                                    |                                   | 0                                       | 0                                              |                          | 0.00                           |                                |                    | 0.00                                |                                | 0.00                             |                               |          |
| 172              | 1975 | Zhao Honglin                      | 2               | middle-class peasant       | 14                    | 2                      | 1                     | 1                       | 5                              |                           | 1                         | 4                              | 48                                     |                           |                                  |                        | 417                                  |                                      |                                         |                                 | 35                                                    |                                          | 48                         | 39.6                                          | 1901                                           | 382                       | 0.77                                         | 294                 |                                              | 2195                               |                                   |                                         | 480                                            | 382                      | 1.03                           | 393.46                         | 180.00             |                                     | 368.83                         | 204.63                           | -184.22                       | 20.41    |
| 173              | 1975 | Yu Jinquan                        | 0               | poor peasant               |                       | 0                      |                       |                         | 0                              |                           |                           |                                | 0                                      |                           |                                  |                        |                                      |                                      |                                         |                                 |                                                       | 0                                        | 39.6                       | 0                                             | 0                                              | 0.57                      | 0                                            |                     | 0                                            |                                    |                                   | 0                                       | 0                                              |                          | 0.00                           |                                |                    | 0.00                                |                                | 0.00                             |                               |          |
| 174              | 1975 | Yu Jinliang                       | 0               | poor peasant               |                       | 0                      |                       |                         | 0                              |                           |                           |                                | 0                                      |                           |                                  |                        |                                      |                                      |                                         |                                 |                                                       | 0                                        | 39.6                       | 0                                             | 0                                              | 0.57                      | 0                                            |                     | 0                                            |                                    |                                   | 0                                       | 0                                              |                          | 0.00                           |                                |                    | 0.00                                |                                | 0.00                             |                               |          |
| 175              | 1975 | Mu Zhaoxin                        | 2               | poor peasant               | 4                     | 1                      | 0                     | 1                       | 4                              | 1                         | 1                         | 2                              | 34                                     |                           |                                  |                        | 77                                   |                                      |                                         |                                 | 10                                                    |                                          | 34                         | 39.6                                          | 1346                                           | 67                        | 0.77                                         | 52                  |                                              | 1398                               |                                   |                                         | 288                                            | 67                       | 1.03                           | 69.01                          | 163.96             |                                     | 196.95                         | 36.02                            | -103.77                       | -67.75   |
| 176              | 1975 | Wang Guijing                      | 0               | poor peasant               |                       | 0                      |                       |                         | 0                              |                           |                           |                                | 0                                      |                           |                                  |                        |                                      |                                      |                                         |                                 |                                                       | 0                                        | 39.6                       | 0                                             | 0                                              | 0.57                      | 0                                            |                     | 0                                            |                                    |                                   | 0                                       | 0                                              |                          | 0.00                           |                                |                    | 0.00                                |                                | 0.00                             |                               |          |
| 177              | 1975 | Zhang Xuezhong                    | 1               | low-middle-class peasant   | 30.5                  | 4                      | 1                     | 3                       | 9                              |                           | 1                         | 8                              | 88                                     |                           |                                  |                        | 1082                                 |                                      |                                         |                                 | 51                                                    |                                          | 88                         | 39.6                                          | 3485                                           | 1031                      | 0.57                                         | 588                 |                                              | 4072                               |                                   |                                         | 864                                            | 1031                     | 1.01                           | 1041.31                        | 20.00              |                                     | 814.86                         | 246.45                           | -1282.31                      | -1035.86 |
| 178              | 1975 | Jia Anji                          | 2               | poor peasant               | 14                    | 2                      | 1                     | 1                       | 6                              | 1                         |                           | 5                              | 56                                     |                           |                                  |                        | 776                                  |                                      |                                         |                                 | 35                                                    |                                          | 56                         | 39.6                                          | 2218                                           | 741                       | 0.77                                         | 571                 | 30                                           | 2818                               |                                   |                                         | 480                                            | 741                      | 1.03                           | 763.23                         |                    |                                     | 703.82                         | 59.41                            | 321.96                        | 381.37   |

(cont.)

| Household number | Year | Name of the head of the household | Production team | Class status (1)     | Basic work points (2) | Total labor forces (3) | Male labor forces (4) | Female labor forces (5) | Total household population (6) | Age: 1 to 3 years old (7) | Age: 4 to 7 years old (8) | Age: 8 years old and above (9) | Work points of grain distribution (10) | Laboring work points (11) | Farmyard manure work points (12) | Total work points (13) | Work points of compulsory labor (14) | Work points of help cultivation (15) | Work points of private plots labor (16) | Total deducted work points (17) | Actual workdays of participation in distribution (18) | Workpoints for rations distribution (19) | Rations per workpoint (20) | Total rations received from distribution (21) | Workdays of participation in distribution (22) | Grains per workpoint (23) | Total grains distributed by work-points (24) | Grains subsidy (25) | Total Grains received from distribution (26) | Distributed grains per person (27) | Distributed grains per adult (28) | Grains received from private plots (29) | Workdays of participation in distribution (30) | Value per workpoint (31) | Total value of workpoints (32) | Money used for investment (33) | Sum of income (34) | Money distributed in this year (34) | Deposit/debt of this year (35) | Deposit/debt over the years (36) | Accumulated deposit/debt (37) |
|------------------|------|-----------------------------------|-----------------|----------------------|-----------------------|------------------------|-----------------------|-------------------------|--------------------------------|---------------------------|---------------------------|--------------------------------|----------------------------------------|---------------------------|----------------------------------|------------------------|--------------------------------------|--------------------------------------|-----------------------------------------|---------------------------------|-------------------------------------------------------|------------------------------------------|----------------------------|-----------------------------------------------|------------------------------------------------|---------------------------|----------------------------------------------|---------------------|----------------------------------------------|------------------------------------|-----------------------------------|-----------------------------------------|------------------------------------------------|--------------------------|--------------------------------|--------------------------------|--------------------|-------------------------------------|--------------------------------|----------------------------------|-------------------------------|
| 179              | 1975 | Liu Peishou                       | 1               | middle-class peasant | 14                    | 2                      | 1                     | 1                       | 4                              |                           |                           | 4                              | 40                                     |                           |                                  |                        | 1071                                 |                                      |                                         |                                 | 35                                                    | 40                                       | 39.6                       | 1584                                          | 1036                                           | 0.57                      | 591                                          |                     | 2175                                         |                                    |                                   | 384                                     | 1036                                           | 1.01                     | 1046.36                        |                                |                    | 696.24                              | 350.12                         | 1181.23                          | 1531.35                       |
| 180              | 1975 | Gao Yunxian                       | 2               | middle-class peasant | 38                    | 5                      | 3                     | 2                       | 10                             | 1                         |                           | 9                              | 96                                     |                           |                                  |                        | 1592                                 |                                      |                                         |                                 | 95                                                    | 96                                       | 39.6                       | 3802                                          | 1497                                           | 0.77                      | 1153                                         | 60                  | 5014                                         |                                    |                                   | 864                                     | 1497                                           | 1.03                     | 1541.91                        |                                |                    | 1269.37                             | 272.54                         | 631.04                           | 903.58                        |
| 181              | 1975 | Tian Kehua                        | 2               | middle-class peasant |                       | 0                      |                       |                         | 0                              |                           |                           |                                | 0                                      |                           |                                  |                        |                                      |                                      |                                         |                                 | 0                                                     | 39.6                                     | 115                        | 0                                             | 0.77                                           | 0                         |                                              | 115                 |                                              |                                    | 96                                | 0                                       | 1.03                                           | 0.00                     | 75.00                          |                                |                    | 48.47                               | 26.53                          | -74.35                           | -47.82                        |
| 182              | 1975 | Tian Dawei                        | 1               | middle-class peasant | 14                    | 2                      | 1                     | 1                       | 6                              | 1                         | 1                         | 4                              | 54                                     |                           |                                  |                        | 411                                  |                                      |                                         |                                 | 35                                                    | 54                                       | 39.6                       | 2138                                          | 376                                            | 0.57                      | 214                                          | 30                  | 2383                                         |                                    |                                   | 480                                     | 376                                            | 1.01                     | 379.76                         | 65.00                          |                    | 504.76                              | -60.00                         | -6.09                            | -66.09                        |
| 183              | 1975 | Fan Liyuan                        | 2               | middle-class peasant | 4                     | 1                      | 0                     | 1                       | 4                              |                           |                           | 4                              | 40                                     |                           |                                  |                        | 898                                  |                                      |                                         |                                 | 10                                                    | 40                                       | 39.6                       | 1584                                          | 888                                            | 0.77                      | 684                                          |                     | 2268                                         |                                    |                                   | 384                                     | 888                                            | 1.03                     | 914.64                         |                                |                    | 1015.95                             | -101.31                        | 751.42                           | 650.11                        |
| 184              | 1975 | Fan Shutang                       | 1               | middle-class peasant | 14                    | 2                      | 1                     | 1                       | 7                              | 1                         |                           | 6                              | 66                                     |                           |                                  |                        | 512                                  |                                      |                                         |                                 | 35                                                    | 66                                       | 39.6                       | 2614                                          | 477                                            | 0.57                      | 272                                          | 30                  | 2915                                         |                                    |                                   | 576                                     | 477                                            | 1.01                     | 481.77                         | 250.09                         |                    | 585.40                              | 146.46                         | -337.73                          | -191.27                       |
| 185              | 1975 | Fan Chunxiang                     | 1               | middle-class peasant | 4                     | 1                      | 0                     | 1                       | 5                              | 2                         |                           | 3                              | 42                                     |                           |                                  |                        | 87                                   |                                      |                                         |                                 | 10                                                    | 42                                       | 39.6                       | 1623                                          | 77                                             | 0.57                      | 44                                           |                     | 1667                                         |                                    |                                   | 288                                     | 77                                             | 1.01                     | 77.77                          | 230.00                         |                    | 262.13                              | 45.64                          | -75.10                           | -29.46                        |
| 186              | 1975 | Lian Huaizhe                      | 2               | poor peasant         | 8                     | 1                      | 1                     | 0                       | 3                              |                           |                           | 3                              | 30                                     |                           |                                  |                        | 515                                  |                                      |                                         |                                 | 20                                                    | 30                                       | 39.6                       | 1188                                          | 495                                            | 0.77                      | 381                                          |                     | 1569                                         |                                    |                                   | 288                                     | 495                                            | 1.03                     | 509.85                         | 1.23                           |                    | 689.65                              | -178.57                        | 300.95                           | 122.38                        |
| 187              | 1975 | Lian Wenbing                      | 2               | poor peasant         | 14                    | 2                      | 1                     | 1                       | 6                              | 1                         | 1                         | 4                              | 54                                     |                           |                                  |                        | 480                                  |                                      |                                         |                                 | 35                                                    | 54                                       | 39.6                       | 2038                                          | 445                                            | 0.77                      | 343                                          |                     | 2381                                         |                                    |                                   | 480                                     | 445                                            | 1.03                     | 458.35                         | 181.12                         |                    | 453.14                              | 186.33                         | -247.37                          | -61.04                        |
| 188              | 1975 | Wu Congyi                         | 1               | poor peasant         | 14                    | 2                      | 1                     | 1                       | 7                              | 1                         | 1                         | 5                              | 64                                     |                           |                                  |                        | 636                                  |                                      |                                         |                                 | 35                                                    | 64                                       | 39.6                       | 2534                                          | 601                                            | 0.57                      | 343                                          | 30                  | 2907                                         |                                    |                                   | 768                                     | 601                                            | 1.01                     | 607.01                         |                                |                    | 605.33                              | 1.68                           | -849.34                          | -847.66                       |
| 189              | 1975 | Wu Laifu                          | 1               | poor peasant         | 14                    | 2                      | 1                     | 1                       | 7                              | 1                         | 1                         | 5                              | 64                                     |                           |                                  |                        | 518                                  |                                      |                                         |                                 | 35                                                    | 64                                       | 39.6                       | 2534                                          | 483                                            | 0.57                      | 275                                          |                     | 2810                                         |                                    |                                   | 576                                     | 483                                            | 1.01                     | 487.83                         |                                |                    | 561.23                              | -73.40                         | -456.51                          | -529.91                       |
| 190              | 1975 | Tian Dayu                         | 2               | poor peasant         |                       | 0                      |                       |                         | 1                              |                           |                           | 1                              | 10                                     |                           |                                  |                        | 360                                  |                                      |                                         |                                 | 10                                                    | 39.6                                     | 396                        | 360                                           | 0.77                                           | 277                       |                                              | 673                 |                                              |                                    | 96                                | 360                                     | 1.03                                           | 370.80                   | 0.94                           |                                | 458.88             | -87.14                              | 545.52                         | 458.38                           |                               |
| 191              | 1975 | Liu Shuting                       | 2               | poor peasant         | 4                     | 1                      | 0                     | 1                       | 5                              | 1                         |                           | 4                              | 46                                     |                           |                                  |                        | 301                                  |                                      |                                         |                                 | 10                                                    | 46                                       | 39.6                       | 1822                                          | 291                                            | 0.77                      | 224                                          |                     | 2046                                         |                                    |                                   | 384                                     | 291                                            | 1.03                     | 299.73                         | 60.00                          |                    | 321.23                              | 38.50                          | 60.97                            | 99.47                         |
| 192              | 1975 | Meng Tiande                       | 2               | poor peasant         | 14                    | 2                      | 1                     | 1                       | 7                              |                           |                           | 7                              | 70                                     |                           |                                  |                        | 780                                  |                                      |                                         |                                 | 35                                                    | 70                                       | 39.6                       | 2772                                          | 745                                            | 0.77                      | 574                                          |                     | 3346                                         |                                    |                                   | 672                                     | 745                                            | 1.03                     | 767.35                         | 2.98                           |                    | 687.57                              | 82.76                          | -78.40                           | 4.36                          |
| 193              | 1975 | Meng Xiulian                      | 2               | poor peasant         | 4                     | 1                      | 0                     | 1                       | 2                              | 1                         |                           | 1                              | 16                                     |                           |                                  |                        | 37                                   |                                      |                                         |                                 | 10                                                    | 16                                       | 39.6                       | 574                                           | 27                                             | 0.77                      | 21                                           |                     | 595                                          |                                    |                                   | 96                                      | 27                                             | 1.03                     | 27.81                          | 70.00                          |                    | 108.52                              | -10.71                         | 5.87                             | -4.84                         |
| 194              | 1975 | Tian Genlong                      | 2               | poor peasant         | 14                    | 2                      | 1                     | 1                       | 7                              | 1                         | 1                         | 5                              | 64                                     |                           |                                  |                        | 549                                  |                                      |                                         |                                 | 35                                                    | 64                                       | 39.6                       | 2534                                          | 514                                            | 0.77                      | 396                                          |                     | 2930                                         |                                    |                                   | 576                                     | 514                                            | 1.03                     | 529.42                         |                                |                    | 612.91                              | -83.49                         | -524.09                          | -607.58                       |
| 195              | 1975 | Zhao Jinlan                       | 2               | poor peasant         | 4                     | 1                      | 0                     | 1                       | 6                              | 1                         | 1                         | 4                              | 54                                     |                           |                                  |                        | 447                                  |                                      |                                         |                                 | 10                                                    | 54                                       | 39.6                       | 2138                                          | 437                                            | 0.77                      | 336                                          |                     | 2475                                         |                                    |                                   | 480                                     | 437                                            | 1.03                     | 450.11                         | 80.10                          |                    | 419.75                              | 110.46                         | -27.49                           | 82.97                         |
| 196              | 1975 | Liu Peiren                        | 2               | middle-class peasant | 14                    | 2                      | 1                     | 1                       | 5                              |                           | 1                         | 4                              | 48                                     |                           |                                  |                        | 514                                  |                                      |                                         |                                 | 35                                                    | 48                                       | 39.6                       | 1901                                          | 479                                            | 0.77                      | 369                                          |                     | 2270                                         |                                    |                                   | 480                                     | 479                                            | 1.03                     | 493.37                         |                                |                    | 468.15                              | 25.22                          | 20.33                            | 45.55                         |
| 197              | 1975 | Liu Peizhu                        | 2               | middle-class peasant | 14                    | 2                      | 1                     | 1                       | 3                              |                           |                           | 3                              | 30                                     |                           |                                  |                        | 456                                  |                                      |                                         |                                 | 35                                                    | 30                                       | 39.6                       | 1188                                          | 421                                            | 0.77                      | 324                                          |                     | 1512                                         |                                    |                                   | 192                                     | 421                                            | 1.03                     | 433.63                         |                                |                    | 396.49                              | 37.14                          | 384.89                           | 422.03                        |
| 198              | 1975 | Liu Peijie                        | 2               | middle-class peasant | 16                    | 3                      | 1                     | 2                       | 6                              | 1                         | 1                         | 4                              | 54                                     |                           |                                  |                        | 345                                  |                                      |                                         |                                 | 40                                                    | 54                                       | 39.6                       | 2138                                          | 305                                            | 0.77                      | 235                                          |                     | 2373                                         |                                    |                                   | 480                                     | 305                                            | 1.03                     | 314.15                         | 76.00                          |                    | 409.79                              | -19.64                         | -294.08                          | -313.72                       |
| 199              | 1975 | Meng Guilan                       | 2               | poor peasant         | 4                     | 1                      | 0                     | 1                       | 5                              |                           | 1                         | 4                              | 48                                     |                           |                                  |                        | 391                                  |                                      |                                         |                                 | 10                                                    | 48                                       | 39.6                       | 1901                                          | 381                                            | 0.77                      | 293                                          |                     | 2194                                         |                                    |                                   | 384                                     | 381                                            | 1.03                     | 392.43                         | 3.32                           |                    | 367.59                              | 28.16                          | 14.05                            | 42.21                         |
| 200              | 1975 | Wang Lianxiang                    | 2               | poor peasant         | 2.5                   | 1                      | 0                     | 1                       | 2                              |                           |                           | 2                              | 20                                     |                           |                                  |                        | 236                                  |                                      |                                         |                                 | 6                                                     | 20                                       | 39.6                       | 792                                           | 230                                            | 0.77                      | 177                                          |                     | 969                                          |                                    |                                   | 192                                     | 230                                            | 1.03                     | 236.90                         |                                |                    | 272.61                              | -35.71                         | 123.48                           | 87.77                         |

(cont.)

| Household number | Year | Name of the head of the household | Production team | Class status (1)           | Basic work points (2) | Total labor forces (3) | Male labor forces (4) | Female labor forces (5) | Total household population (6) | Age: 1 to 3 years old (7) | Age: 4 to 7 years old (8) | Age: 8 years old and above (9) | Work points of grain distribution (10) | Laboring work points (11) | Farmyard work points (12) | Total work points (13) | Work points of compulsory labor (14) | Work points of help cultivation (15) | Work points of private plots labor (16) | Total deducted work points (17) | Actual workdays of participation in distribution (18) | Workpoints for rations distribution (19) | Rations per workpoint (20) | Total rations received from distribution (21) | Workdays of participation in distribution (22) | Grains per workpoint (23) | Total grains distributed by work-points (24) | Grains subsidy (25) | Total Grains received from distribution (26) | Distributed grains per person (27) | Distributed grains per adult (28) | Grains received from private plots (29) | Workdays of participation in distribution (30) | Value per workpoint (31) | Total value of workpoints (32) | Money used for investment (33) | Sum of income (34) | Money distributed in this year (34) | Deposit/debt of this year (35) | Deposit/debt over the years (36) | Accumulated deposit/debt (37) |
|------------------|------|-----------------------------------|-----------------|----------------------------|-----------------------|------------------------|-----------------------|-------------------------|--------------------------------|---------------------------|---------------------------|--------------------------------|----------------------------------------|---------------------------|---------------------------|------------------------|--------------------------------------|--------------------------------------|-----------------------------------------|---------------------------------|-------------------------------------------------------|------------------------------------------|----------------------------|-----------------------------------------------|------------------------------------------------|---------------------------|----------------------------------------------|---------------------|----------------------------------------------|------------------------------------|-----------------------------------|-----------------------------------------|------------------------------------------------|--------------------------|--------------------------------|--------------------------------|--------------------|-------------------------------------|--------------------------------|----------------------------------|-------------------------------|
| 201              | 1975 | Wang Ende                         | 2               | poor peasant               |                       | 0                      |                       |                         | 1                              |                           |                           | 1                              | 10                                     |                           |                           |                        |                                      |                                      |                                         |                                 | 10                                                    | 39.6                                     | 396                        | 0                                             | 0.77                                           | 0                         | 396                                          |                     |                                              | 192                                | 0                                 | 1.03                                    | 0.00                                           | 70.00                    |                                | 67.00                          | 3.00               | 33.36                               | 36.36                          |                                  |                               |
| 202              | 1975 | Meng Mingqing                     | 2               | low-middle-class peasant   |                       | 0                      |                       |                         | 2                              |                           |                           | 2                              | 20                                     |                           |                           | 175                    |                                      |                                      |                                         | 20                              |                                                       | 39.6                                     | 79                         | 175                                           | 0.77                                           | 135                       | 927                                          |                     |                                              | 192                                | 175                               | 1.03                                    | 180.25                                         | 70.00                    | 302.87                         | -122.62                        | 489.90             | 367.28                              |                                |                                  |                               |
| 203              | 1975 | Meng Tianseng                     | 2               | low-middle-class peasant   | 14                    | 2                      | 1                     | 1                       | 5                              | 1                         | 1                         | 3                              | 44                                     |                           |                           | 519                    |                                      |                                      |                                         | 35                              |                                                       | 39.6                                     | 1742                       | 484                                           | 0.77                                           | 373                       | 2115                                         |                     |                                              | 384                                | 484                               | 1.03                                    | 498.52                                         | 9.88                     | 492.66                         | 15.74                          | 187.20             | 202.94                              |                                |                                  |                               |
| 204              | 1975 | Wang Yueming                      | 2               | poor peasant               | 4                     | 1                      | 0                     | 1                       | 10                             |                           | 1                         | 9                              | 98                                     |                           |                           | 586                    |                                      |                                      |                                         | 10                              |                                                       | 39.6                                     | 3881                       | 576                                           | 0.77                                           | 444                       | 4324                                         |                     |                                              | 960                                | 576                               | 1.03                                    | 593.28                                         | 152.00                   | 673.79                         | 71.49                          | 27.82              | 99.31                               |                                |                                  |                               |
| 205              | 1975 | Wang Heshun                       | 2               | poor peasant               | 6.5                   | 2                      | 0                     | 2                       | 5                              |                           |                           | 5                              | 50                                     |                           |                           | 574                    |                                      |                                      |                                         | 10                              |                                                       | 39.6                                     | 1980                       | 558                                           | 0.77                                           | 430                       | 2410                                         |                     |                                              | 576                                | 558                               | 1.03                                    | 574.74                                         |                          | 494.31                         | 80.43                          | 54.21              | 134.64                              |                                |                                  |                               |
| 206              | 1975 | Wen Yingjie                       | 2               | upper-middle-class peasant | 14.5                  | 3                      | 1                     | 2                       | 4                              |                           |                           | 4                              | 40                                     |                           |                           | 777                    |                                      |                                      |                                         | 36                              |                                                       | 39.6                                     | 1584                       | 741                                           | 0.77                                           | 571                       | 2155                                         |                     |                                              | 384                                | 741                               | 1.03                                    | 763.23                                         |                          | 691.17                         | 72.06                          | 609.12             | 681.18                              |                                |                                  |                               |
| 207              | 1975 | Liu Peiqian                       | 2               | low-middle-class peasant   | 34.5                  | 6                      | 2                     | 4                       | 10                             | 1                         |                           | 9                              | 96                                     |                           |                           | 1730                   |                                      |                                      |                                         | 86                              |                                                       | 39.6                                     | 3742                       | 1644                                          | 0.77                                           | 1266                      | 60                                           | 5068                |                                              |                                    | 768                               | 1644                                    | 1.03                                           | 1693.32                  |                                | 1225.72                        | 467.60             | 8.31                                | 475.91                         |                                  |                               |
| 208              | 1975 | Liu Zhaoji                        | 2               | low-middle-class peasant   | 14                    | 2                      | 1                     | 1                       | 6                              | 1                         | 2                         | 3                              | 52                                     |                           |                           | 632                    |                                      |                                      |                                         | 35                              |                                                       | 39.6                                     | 2059                       | 597                                           | 0.77                                           | 460                       | 30                                           | 2549                |                                              |                                    | 480                               | 597                                     | 1.03                                           | 614.91                   |                                | 509.22                         | 105.69             | 0.95                                | 106.64                         |                                  |                               |
| 209              | 1975 | Yu Shengliang                     | 2               | poor peasant               |                       | 0                      |                       |                         | 2                              |                           |                           | 2                              | 20                                     |                           |                           | 252                    |                                      |                                      |                                         | 20                              |                                                       | 39.6                                     | 792                        | 252                                           | 0.77                                           | 194                       | 986                                          |                     |                                              | 288                                | 252                               | 1.03                                    | 259.56                                         | 0.05                     | 252.03                         | 7.58                           | 229.97             | 237.55                              |                                |                                  |                               |
| 210              | 1975 | Meng Tianyou                      | 1               | poor peasant               |                       | 0                      |                       |                         | 1                              |                           |                           | 1                              | 10                                     |                           |                           | 142                    |                                      |                                      |                                         | 10                              |                                                       | 39.6                                     | 396                        | 142                                           | 0.57                                           | 81                        | 477                                          |                     |                                              | 96                                 | 142                               | 1.01                                    | 143.42                                         |                          | 141.66                         | 1.76                           | 199.61             | 201.37                              |                                |                                  |                               |
| 211              | 1975 | Meng Tianfu                       | 2               | middle-class peasant       | 14                    | 2                      | 1                     | 1                       | 3                              | 1                         |                           | 2                              | 26                                     |                           |                           | 654                    |                                      |                                      |                                         | 35                              |                                                       | 39.6                                     | 940                        | 619                                           | 0.77                                           | 477                       | 30                                           | 1447                |                                              |                                    | 96                                | 619                                     | 1.03                                           | 637.57                   | 200.00                         | 372.91                         | 464.66             | 170.91                              | 635.57                         |                                  |                               |
| 212              | 1975 | Meng Xisheng                      | 2               | middle-class peasant       | 14                    | 2                      | 1                     | 1                       | 6                              | 1                         | 2                         | 3                              | 52                                     |                           |                           | 440                    |                                      |                                      |                                         | 35                              |                                                       | 39.6                                     | 2059                       | 405                                           | 0.77                                           | 312                       | 2371                                         |                     |                                              | 576                                | 405                               | 1.03                                    | 417.15                                         | 0.10                     | 531.28                         | -114.03                        | 25.65              | -88.38                              |                                |                                  |                               |
| 213              | 1975 | Gui Tiankuan                      | 1               | poor peasant               | 28.5                  | 5                      | 2                     | 3                       | 8                              | 1                         |                           | 7                              | 76                                     |                           |                           | 1153                   |                                      |                                      |                                         | 71                              |                                                       | 39.6                                     | 2990                       | 1082                                          | 0.57                                           | 617                       | 30                                           | 3637                |                                              |                                    | 672                               | 1082                                    | 1.01                                           | 1092.82                  |                                | 1007.68                        | 85.14              | 1039.84                             | 1124.98                        |                                  |                               |
| 214              | 1975 | Kang Huaizhi                      | 2               | poor peasant               | 14                    | 2                      | 1                     | 1                       | 9                              | 1                         | 2                         | 6                              | 82                                     |                           |                           | 580                    |                                      |                                      |                                         | 35                              |                                                       | 39.6                                     | 3247                       | 545                                           | 0.77                                           | 420                       | 3667                                         |                     |                                              | 768                                | 545                               | 1.03                                    | 561.35                                         | 50.00                    | 683.07                         | -71.72                         | -1239.37           | -1311.09                            |                                |                                  |                               |
| 215              | 1975 | Liu Huaqing                       | 2               | poor peasant               | 12                    | 2                      | 1                     | 1                       | 6                              |                           | 1                         | 5                              | 58                                     |                           |                           | 225                    |                                      |                                      |                                         | 30                              |                                                       | 39.6                                     | 2297                       | 195                                           | 0.77                                           | 150                       | 2447                                         |                     |                                              | 576                                | 195                               | 1.03                                    | 200.85                                         | 100.00                   | 404.87                         | -104.02                        | 136.88             | 32.86                               |                                |                                  |                               |
| 216              | 1975 | Meng Xiuying                      | 2               | poor peasant               | 6.5                   | 2                      | 0                     | 2                       | 5                              | 2                         | 1                         | 2                              | 40                                     |                           |                           | 352                    |                                      |                                      |                                         | 16                              |                                                       | 39.6                                     | 1584                       | 336                                           | 0.77                                           | 259                       | 1843                                         |                     |                                              | 480                                | 336                               | 1.03                                    | 346.08                                         | 100.00                   | 338.88                         | 107.20                         | 329.82             | 437.02                              |                                |                                  |                               |
| 217              | 1975 | Meng Peiliang                     | 2               | middle-class peasant       | 32                    | 4                      | 3                     | 1                       | 9                              |                           | 1                         | 8                              | 88                                     |                           |                           | 1297                   |                                      |                                      |                                         | 100                             |                                                       | 39.6                                     | 3485                       | 1197                                          | 0.77                                           | 922                       | 4406                                         |                     |                                              | 960                                | 1197                              | 1.03                                    | 1232.91                                        | 0.15                     | 1059.05                        | 174.01                         | 783.29             | 957.30                              |                                |                                  |                               |
| 218              | 1975 | Meng Mingcheng                    | 2               | middle-class peasant       |                       | 0                      |                       |                         | 0                              |                           |                           |                                | 0                                      |                           |                           |                        |                                      |                                      |                                         | 0                               |                                                       | 39.6                                     | 0                          | 0                                             | 0.77                                           | 0                         | 0                                            |                     |                                              | 0                                  | 0                                 | 1.03                                    | 0.00                                           |                          |                                | 0.00                           |                    | 0.00                                |                                |                                  |                               |
| 219              | 1975 | Wu Shi'en                         | 1               | poor peasant               | 24                    | 4                      | 2                     | 2                       | 6                              | 1                         |                           | 5                              | 56                                     |                           |                           | 816                    |                                      |                                      |                                         | 60                              |                                                       | 39.6                                     | 2218                       | 756                                           | 0.57                                           | 431                       | 2649                                         |                     |                                              | 576                                | 756                               | 1.01                                    | 763.56                                         |                          | 573.06                         | 190.50                         | 0.48               | 190.98                              |                                |                                  |                               |
| 220              | 1975 | Wang Qingwen                      | 1               | poor peasant               | 12                    | 2                      | 1                     | 1                       | 4                              |                           |                           | 4                              | 40                                     |                           |                           | 774                    |                                      |                                      |                                         | 30                              |                                                       | 39.6                                     | 1584                       | 744                                           | 0.57                                           | 424                       | 2008                                         |                     |                                              | 480                                | 744                               | 1.01                                    | 751.44                                         | 2.23                     | 1076.24                        | -322.57                        | 715.26             | 392.69                              |                                |                                  |                               |
| 221              | 1975 | Ji Chunmei                        | 2               | poor peasant               |                       | 0                      |                       |                         | 0                              |                           |                           |                                | 0                                      |                           |                           |                        |                                      |                                      |                                         | 0                               |                                                       | 39.6                                     | 0                          | 0                                             | 0.57                                           | 0                         | 0                                            |                     |                                              | 0                                  | 0                                 | 1.01                                    | 0.00                                           | 296.75                   |                                | 296.75                         |                    | 296.75                              |                                |                                  |                               |
| 222              | 1975 | Li Yushu                          | 1               | poor peasant               | 8                     | 1                      | 1                     | 0                       | 3                              |                           |                           | 3                              | 30                                     |                           |                           | 618                    |                                      |                                      |                                         | 20                              |                                                       | 39.6                                     | 1188                       | 598                                           | 0.57                                           | 341                       | 1529                                         |                     |                                              | 288                                | 598                               | 1.01                                    | 603.98                                         | 0.21                     | 506.17                         | 98.02                          | 685.79             | 783.81                              |                                |                                  |                               |
| 223              | 1975 | Yu Zhenji                         | 2               | poor peasant               | 10                    | 1                      | 1                     | 0                       | 1                              |                           |                           | 1                              | 10                                     |                           |                           | 410                    |                                      |                                      |                                         | 25                              |                                                       | 39.6                                     | 396                        | 385                                           | 0.77                                           | 296                       | 692                                          |                     |                                              | 96                                 | 385                               | 1.03                                    | 396.55                                         |                          | 239.89                         | 156.66                         | 277.87             | 434.53                              |                                |                                  |                               |



DATASET DONGBEILI-SHANXI

(cont.)

| Household number | Year | Name of the head of the household | Production team | Class status (1)         | Basic work points (2) | Total labor forces (3) | Male labor forces (4) | Female labor forces (5) | Total household population (6) | Age: 1 to 3 years old (7) | Age: 4 to 7 years old (8) | Age: 8 years old and above (9) | Work points of grain distribution (10) | Laboring work points (11) | Farmyard manure work points (12) | Total work points (13) | Work points of compulsory labor (14) | Work points of help cultivation (15) | Work points of private plots labor (16) | Total deducted work points (17) | Actual workdays of participation in distribution (18) | Workpoints for rations distribution (19) | Rations per workpoint (20) | Total rations received from distribution (21) | Workdays of participation in distribution (22) | Grains per workpoint (23) | Total grains distributed by work-points (24) | Grains subsidy (25) | Total Grains received from distribution (26) | Distributed grains per person (27) | Distributed grains per adult (28) | Grains received from private plots (29) | Workdays of participation in distribution (30) | Value per workpoint (31) | Total value of workpoints (32) | Money used for investment (33) | Sum of income (34) | Money distributed in this year (34) | Deposit/debt of this year (35) | Deposit/debt over the years (36) | Accumulated deposit/debt (37) |
|------------------|------|-----------------------------------|-----------------|--------------------------|-----------------------|------------------------|-----------------------|-------------------------|--------------------------------|---------------------------|---------------------------|--------------------------------|----------------------------------------|---------------------------|----------------------------------|------------------------|--------------------------------------|--------------------------------------|-----------------------------------------|---------------------------------|-------------------------------------------------------|------------------------------------------|----------------------------|-----------------------------------------------|------------------------------------------------|---------------------------|----------------------------------------------|---------------------|----------------------------------------------|------------------------------------|-----------------------------------|-----------------------------------------|------------------------------------------------|--------------------------|--------------------------------|--------------------------------|--------------------|-------------------------------------|--------------------------------|----------------------------------|-------------------------------|
| 224              | 1975 | Meng Jinxi                        | 0               | poor peasant             |                       | 0                      |                       |                         | 0                              |                           |                           |                                | 0                                      |                           |                                  |                        |                                      |                                      |                                         |                                 |                                                       | 0                                        | 39.6                       | 0                                             | 0                                              | 0.57                      | 0                                            |                     | 0                                            |                                    | 0                                 |                                         | 0                                              |                          | 0.00                           |                                |                    |                                     | 0.00                           |                                  | 0.00                          |
| 225              | 1975 | Li Guangkai                       | 1               | poor peasant             |                       | 0                      |                       |                         | 0                              |                           |                           |                                | 0                                      |                           |                                  |                        |                                      |                                      |                                         |                                 |                                                       | 0                                        | 39.6                       | 0                                             | 0                                              | 0.57                      | 0                                            |                     | 0                                            |                                    | 0                                 |                                         | 0                                              | 1.01                     | 0.00                           | 82.80                          |                    | 12.91                               | 69.89                          | -82.80                           | -12.91                        |
| 226              | 1975 | Liu Jigeng                        | 2               | poor peasant             | 26.5                  | 4                      | 2                     | 2                       | 7                              |                           |                           | 7                              | 70                                     |                           |                                  |                        | 641                                  |                                      |                                         |                                 | 66                                                    | 70                                       | 39.6                       | 2693                                          | 575                                            | 0.77                      | 443                                          |                     | 3116                                         |                                    | 576                               | 575                                     | 1.03                                           | 592.25                   |                                | 770.56                         | -178.31            | 435.50                              | 257.19                         |                                  |                               |
| 227              | 1975 | Fan Shuzhi                        | 1               | middle-class peasant     | 14                    | 2                      | 1                     | 1                       | 7                              | 1                         | 1                         | 5                              | 64                                     |                           |                                  |                        | 470                                  |                                      |                                         |                                 | 35                                                    | 64                                       | 39.6                       | 2534                                          | 435                                            | 0.57                      | 248                                          |                     | 2782                                         |                                    | 576                               | 435                                     | 1.01                                           | 439.35                   | 340.00                         | 528.94                         | 250.41             | -510.72                             | -260.31                        |                                  |                               |
| 228              | 1975 | Ji Guanglian                      | 1               | low-middle-class peasant | 4                     | 1                      | 0                     | 1                       | 5                              | 1                         | 1                         | 3                              | 44                                     |                           |                                  |                        | 1                                    |                                      |                                         |                                 | 10                                                    | 44                                       | 39.6                       | 1742                                          |                                                | 0.57                      | 0                                            |                     | 1742                                         |                                    | 384                               | 0                                       | 1.01                                           | 0.00                     | 300.00                         |                                | 262.34             | 37.66                               | -45.14                         | -7.48                            |                               |
| 229              | 1975 | Yang Xiaozhong                    | 1               | low-middle-class peasant | 14                    | 2                      | 1                     | 1                       | 5                              | 1                         | 2                         | 2                              | 42                                     |                           |                                  |                        | 604                                  |                                      |                                         |                                 | 35                                                    | 42                                       | 39.6                       | 1663                                          | 569                                            | 0.57                      | 324                                          | 30                  | 2018                                         |                                    | 384                               | 569                                     | 1.01                                           | 574.69                   |                                | 498.57                         | 76.12              | 435.19                              | 511.31                         |                                  |                               |
| 230              | 1975 | Meng Minghong                     | 2               | middle-class peasant     | 14                    | 2                      | 1                     | 1                       | 5                              | 1                         | 2                         | 2                              | 42                                     |                           |                                  |                        | 465                                  |                                      |                                         |                                 | 35                                                    | 42                                       | 39.6                       | 1663                                          | 430                                            | 0.77                      | 331                                          | 30                  | 2024                                         |                                    | 384                               | 430                                     | 1.03                                           | 442.90                   | 0.09                           | 472.52                         | -29.53             | 220.66                              | 191.13                         |                                  |                               |
| 231              | 1975 | Zhang Xuewen                      | 0               | poor peasant             |                       | 0                      |                       |                         | 0                              |                           |                           |                                | 0                                      |                           |                                  |                        |                                      |                                      |                                         |                                 |                                                       | 0                                        | 39.6                       | 0                                             | 0                                              | 0.57                      | 0                                            |                     | 0                                            |                                    | 0                                 |                                         | 0                                              |                          | 0.00                           |                                |                    | 0.00                                |                                | 0.00                             |                               |
| 232              | 1975 | Wu Jingxiu                        | 0               | middle-class peasant     |                       | 0                      |                       |                         | 0                              |                           |                           |                                | 0                                      |                           |                                  |                        |                                      |                                      |                                         |                                 |                                                       | 0                                        | 39.6                       | 0                                             | 0                                              | 0.57                      | 0                                            |                     | 0                                            |                                    | 0                                 |                                         | 0                                              |                          | 0.00                           |                                |                    | 0.00                                |                                | 0.00                             |                               |
| 233              | 1975 | Fan Shugen                        | 2               | middle-class peasant     | 14                    | 2                      | 1                     | 1                       | 4                              | 1                         | 1                         | 2                              | 34                                     |                           |                                  |                        | 692                                  |                                      |                                         |                                 | 35                                                    | 34                                       | 39.6                       | 1346                                          | 657                                            | 0.77                      | 506                                          | 30                  | 1882                                         |                                    | 288                               | 657                                     | 1.03                                           | 676.71                   |                                | 611.30                         | 65.41              | 619.37                              | 684.78                         |                                  |                               |
| 234              | 1975 | Yang Xiaoheng                     | 1               |                          |                       | 0                      |                       |                         | 0                              |                           |                           |                                | 0                                      |                           |                                  |                        |                                      |                                      |                                         |                                 |                                                       | 0                                        | 39.6                       | 0                                             | 0                                              | 0.57                      | 0                                            |                     | 0                                            |                                    | 0                                 |                                         | 0                                              | 1.01                     | 0.00                           |                                |                    | 0.00                                |                                | 0.00                             |                               |
| 235              | 1975 | Fan Xuewen                        | 1               |                          |                       | 0                      |                       |                         | 2                              |                           |                           | 2                              | 20                                     |                           |                                  |                        |                                      |                                      |                                         |                                 |                                                       | 20                                       | 39.6                       | 792                                           | 0                                              | 0.57                      | 0                                            |                     | 792                                          |                                    | 192                               | 0                                       | 1.01                                           | 0.00                     | 115.10                         |                                | 103.35             | 11.75                               | -74.03                         | -62.28                           |                               |
| 236              | 1975 | Liu Yuzhen                        | 1               |                          |                       | 0                      |                       |                         | 0                              |                           |                           |                                | 0                                      |                           |                                  |                        |                                      |                                      |                                         |                                 |                                                       | 0                                        | 39.6                       | 0                                             | 0                                              | 0.57                      | 0                                            |                     | 0                                            |                                    | 0                                 |                                         | 0                                              | 1.01                     | 0.00                           |                                |                    | 0.00                                |                                | 0.00                             |                               |
| 237              | 1975 | Mu Chuncui                        | 1               | poor peasant             |                       | 0                      |                       |                         | 0                              |                           |                           |                                | 0                                      |                           |                                  |                        |                                      |                                      |                                         |                                 |                                                       | 0                                        | 39.6                       | 0                                             | 0                                              | 0.77                      | 0                                            |                     | 0                                            |                                    | 0                                 |                                         | 0                                              | 1.03                     | 0.00                           |                                |                    | 0.00                                |                                | 0.00                             |                               |
| 238              | 1975 | Meng Mingliang                    | 2               | poor peasant             |                       | 0                      |                       |                         | 0                              |                           |                           |                                | 0                                      |                           |                                  |                        |                                      |                                      |                                         |                                 |                                                       | 0                                        | 39.6                       | 0                                             | 0                                              | 0.77                      | 0                                            |                     | 0                                            |                                    | 0                                 |                                         | 0                                              | 1.03                     | 0.00                           |                                |                    | 0.00                                |                                | 0.00                             |                               |
| 239              | 1975 | Wang Guilan                       | 1               | poor peasant             |                       | 0                      |                       |                         | 1                              |                           |                           | 1                              | 10                                     |                           |                                  |                        | 219                                  |                                      |                                         |                                 | 10                                                    | 39.6                                     | 396                        | 219                                           | 0.57                                           | 125                       |                                              | 521                 |                                              | 96                                 | 219                               | 1.01                                    | 221.19                                         |                          | 170.01                         | 51.18                          | 210.55             | 261.73                              |                                |                                  |                               |
| 240              | 1975 | Wang Chuanxian                    | 1               | poor peasant             | 14                    | 2                      | 1                     | 1                       | 6                              | 1                         | 1                         | 4                              | 54                                     |                           |                                  |                        | 574                                  |                                      |                                         |                                 | 35                                                    | 54                                       | 39.6                       | 2088                                          | 539                                            | 0.57                      | 307                                          |                     | 2395                                         |                                    | 384                               | 539                                     | 1.01                                           | 544.39                   | 301.50                         | 627.80                         | 218.09             | -151.39                             | 66.70                          |                                  |                               |
| 241              | 1975 | Wang Zhenquan                     | 1               | poor peasant             |                       | 0                      |                       |                         | 3                              |                           |                           | 3                              | 30                                     |                           |                                  |                        | 364                                  |                                      |                                         |                                 |                                                       | 30                                       | 39.6                       | 1188                                          | 364                                            | 0.57                      | 207                                          |                     | 1395                                         |                                    | 288                               | 364                                     | 1.01                                           | 367.64                   |                                | 426.06                         | -58.42             | 121.70                              | 63.28                          |                                  |                               |
| 243              | 1975 | Li Xiuying                        | 1               | poor peasant             |                       | 0                      |                       |                         | 0                              |                           |                           |                                | 0                                      |                           |                                  |                        |                                      |                                      |                                         |                                 |                                                       | 0                                        | 39.6                       | 0                                             | 0                                              | 0.57                      | 0                                            |                     | 0                                            |                                    | 0                                 |                                         | 0                                              | 1.01                     | 0.00                           |                                |                    | 0.00                                |                                | 0.00                             |                               |
| 244              | 1975 | Meng Jingxi                       | 1               | poor peasant             |                       | 0                      |                       |                         | 0                              |                           |                           |                                | 0                                      |                           |                                  |                        |                                      |                                      |                                         |                                 |                                                       | 0                                        | 39.6                       | 0                                             | 0                                              | 0.57                      | 0                                            |                     | 0                                            |                                    | 0                                 |                                         | 0                                              | 1.01                     | 0.00                           |                                |                    | 0.00                                |                                | 0.00                             |                               |
| 245              | 1975 | Cao Jinren                        | 1               | poor peasant             |                       | 0                      |                       |                         | 0                              |                           |                           |                                | 0                                      |                           |                                  |                        |                                      |                                      |                                         |                                 |                                                       | 0                                        | 39.6                       | 0                                             | 0                                              | 0.57                      | 0                                            |                     | 0                                            |                                    | 0                                 |                                         | 0                                              | 1.01                     | 0.00                           |                                |                    | 0.00                                |                                | 0.00                             |                               |
| 247              | 1975 | Wu Jinggui                        | 1               | poor peasant             | 14                    | 2                      | 1                     | 1                       | 3                              | 1                         |                           | 2                              | 26                                     |                           |                                  |                        | 501                                  |                                      |                                         |                                 | 35                                                    | 26                                       | 39.6                       | 1030                                          | 466                                            | 0.57                      | 266                                          | 30                  | 1325                                         |                                    | 96                                | 466                                     | 1.01                                           | 470.66                   | 60.00                          | 285.73                         | 244.93             | 382.80                              | 627.73                         |                                  |                               |
| 248              | 1975 | Zhang Yucang                      | 1               |                          |                       | 0                      |                       |                         | 0                              |                           |                           |                                | 0                                      |                           |                                  |                        |                                      |                                      |                                         |                                 |                                                       | 0                                        | 39.6                       | 0                                             | 0                                              | 0.57                      | 0                                            |                     | 0                                            |                                    | 0                                 |                                         | 0                                              | 1.01                     | 0.00                           |                                |                    | 0.00                                |                                | 0.00                             |                               |
| 249              | 1975 | Zhang Lirong                      | 2               | poor peasant             | 8                     | 2                      | 0                     | 2                       | 3                              |                           |                           | 3                              | 30                                     |                           |                                  |                        | 331                                  |                                      |                                         |                                 | 20                                                    | 30                                       | 39.6                       | 1188                                          | 311                                            | 0.77                      | 239                                          |                     | 1427                                         |                                    | 288                               | 311                                     | 1.03                                           | 320.33                   |                                | 375.91                         | -55.58             | 119.05                              | 63.47                          |                                  |                               |
| 250              | 1975 | Zhang Liwen                       | 2               | poor peasant             | 14                    | 2                      | 1                     | 1                       | 5                              | 1                         | 2                         | 2                              | 42                                     |                           |                                  |                        | 571                                  |                                      |                                         |                                 | 35                                                    | 42                                       | 39.6                       | 1663                                          | 536                                            | 0.77                      | 413                                          |                     | 2076                                         |                                    | 384                               | 536                                     | 1.03                                           | 552.08                   | 0.05                           | 473.13                         | 79.00              | 246.52                              | 325.52                         |                                  |                               |
| 251              | 1975 | Liu Ning                          | 2               |                          |                       | 0                      |                       |                         | 0                              |                           |                           |                                | 0                                      |                           |                                  |                        |                                      |                                      |                                         |                                 |                                                       | 0                                        | 39.6                       | 0                                             | 0                                              | 0.77                      | 0                                            |                     | 0                                            |                                    | 0                                 |                                         | 0                                              | 1.03                     | 0.00                           |                                |                    | 0.00                                |                                | 0.00                             |                               |

(cont.)

| Household number | Year | Name of the head of the household | Production team | Class status (1)         | Basic work points (2) | Total labor forces (3) | Male labor forces (4) | Female labor forces (5) | Total household population (6) | Age: 1 to 3 years old (7) | Age: 4 to 7 years old (8) | Age: 8 years old and above (9) | Work points of grain distribution (10) | Laboring work points (11) | Farmyard manure work points (12) | Total work points (13) | Work points of compulsory labor (14) | Work points of help cultivation (15) | Work points of private plots labor (16) | Total deducted work points (17) | Actual workdays of participation in distribution (18) | Workpoints for rations distribution (19) | Rations per workpoint (20) | Total rations received from distribution (21) | Workdays of participation in distribution (22) | Grains per workpoint (23) | Total grains distributed by work-points (24) | Grains subsidy (25) | Total Grains received from distribution (26) | Distributed grains per person (27) | Distributed grains per adult (28) | Grains received from private plots (29) | Workdays of participation in distribution (30) | Value per workpoint (31) | Total value of workpoints (32) | Money used for investment (33) | Sum of income (34) | Money distributed in this year (34) | Deposit/debt of this year (35) | Deposit/debt over the years (36) | Accumulated deposit/debt (37) |         |
|------------------|------|-----------------------------------|-----------------|--------------------------|-----------------------|------------------------|-----------------------|-------------------------|--------------------------------|---------------------------|---------------------------|--------------------------------|----------------------------------------|---------------------------|----------------------------------|------------------------|--------------------------------------|--------------------------------------|-----------------------------------------|---------------------------------|-------------------------------------------------------|------------------------------------------|----------------------------|-----------------------------------------------|------------------------------------------------|---------------------------|----------------------------------------------|---------------------|----------------------------------------------|------------------------------------|-----------------------------------|-----------------------------------------|------------------------------------------------|--------------------------|--------------------------------|--------------------------------|--------------------|-------------------------------------|--------------------------------|----------------------------------|-------------------------------|---------|
| 252              | 1975 | Niu Lanmei                        | 2               | poor peasant             | 4                     | 1                      | 0                     | 1                       | 2                              |                           | 1                         | 1                              | 18                                     |                           |                                  |                        |                                      |                                      |                                         | 10                              |                                                       | 18                                       | 39.6                       | 713                                           |                                                | 0.77                      | 0                                            |                     | 713                                          |                                    |                                   | 192                                     | 0                                              | 1.03                     | 0.00                           |                                |                    | 92.81                               | -92.81                         | -129.00                          | -221.81                       |         |
| 253              | 1975 | Meng Minglu                       | 2               | low-middle-class peasant | 22                    | 3                      | 2                     | 1                       | 5                              |                           |                           | 5                              | 50                                     |                           |                                  |                        | 1285                                 |                                      |                                         |                                 | 55                                                    |                                          | 50                         | 39.6                                          | 1980                                           | 1230                      | 0.77                                         | 947                 |                                              | 2927                               |                                   |                                         | 480                                            | 1230                     | 1.03                           | 1266.90                        |                    |                                     | 1245.80                        | 21.10                            | 1398.89                       | 1419.99 |
| 256              | 1975 | Cui Yongfu                        | 2               | poor peasant             |                       | 0                      |                       |                         | 0                              |                           |                           |                                | 0                                      |                           |                                  |                        |                                      |                                      |                                         |                                 |                                                       | 0                                        | 39.6                       | 0                                             | 0                                              | 0.77                      | 0                                            |                     | 0                                            |                                    |                                   | 0                                       | 0                                              | 1.03                     | 0.00                           |                                |                    | 0.00                                |                                | 0.00                             |                               |         |
| 257              | 1975 | An Guobao                         | 1               | teacher                  |                       | 0                      |                       |                         | 0                              |                           |                           |                                | 0                                      |                           |                                  |                        |                                      |                                      |                                         |                                 |                                                       | 0                                        | 39.6                       | 0                                             | 0                                              | 0.57                      | 0                                            |                     | 0                                            |                                    |                                   | 0                                       | 0                                              |                          | 0.00                           | 2.10                           |                    | 8.15                                | -6.05                          | -47.08                           | -53.13                        |         |
| 258              | 1975 | Liang Guangsheng                  |                 | teacher                  |                       | 0                      |                       |                         | 0                              |                           |                           |                                | 0                                      |                           |                                  |                        |                                      |                                      |                                         |                                 |                                                       | 0                                        | 39.6                       | 0                                             | 0                                              | 0.57                      | 0                                            |                     | 0                                            |                                    |                                   | 0                                       | 0                                              |                          | 0.00                           |                                |                    | 0.00                                | -38.52                         | -38.52                           |                               |         |
| 259              | 1975 | Liu Jinlian                       |                 | teacher                  |                       | 0                      |                       |                         | 0                              |                           |                           |                                | 0                                      |                           |                                  |                        |                                      |                                      |                                         |                                 |                                                       | 0                                        | 39.6                       | 0                                             | 0                                              | 0.57                      | 0                                            |                     | 0                                            |                                    |                                   | 0                                       | 0                                              |                          | 0.00                           |                                |                    | 0.00                                |                                | 0.00                             |                               |         |
| 260              | 1975 | Liu Xuexu                         |                 | cadre                    |                       | 0                      |                       |                         | 0                              |                           |                           |                                | 0                                      |                           |                                  |                        |                                      |                                      |                                         |                                 |                                                       | 0                                        | 39.6                       | 0                                             | 0                                              | 0.57                      | 0                                            |                     | 0                                            |                                    |                                   | 0                                       | 0                                              |                          | 0.00                           | 0.61                           |                    |                                     | 0.61                           |                                  | 0.61                          |         |
| 261              | 1975 | Huang Qingxiang                   |                 | teacher                  |                       | 0                      |                       |                         | 0                              |                           |                           |                                | 0                                      |                           |                                  |                        |                                      |                                      |                                         |                                 |                                                       | 0                                        | 39.6                       | 0                                             | 0                                              | 0.57                      | 0                                            |                     | 0                                            |                                    |                                   | 0                                       | 0                                              |                          | 0.00                           |                                |                    | 0.00                                | -4.45                          | -4.45                            |                               |         |
| 262              | 1975 | Han Junxiu                        |                 | cadre                    |                       | 0                      |                       |                         | 0                              |                           |                           |                                | 0                                      |                           |                                  |                        |                                      |                                      |                                         |                                 |                                                       | 0                                        | 39.6                       | 0                                             | 0                                              | 0.57                      | 0                                            |                     | 0                                            |                                    |                                   | 0                                       | 0                                              |                          | 0.00                           |                                |                    | 0.00                                | -9.40                          | -9.40                            |                               |         |
| 263              | 1975 | Li Yonggong                       |                 | cadre                    |                       | 0                      |                       |                         | 0                              |                           |                           |                                | 0                                      |                           |                                  |                        |                                      |                                      |                                         |                                 |                                                       | 0                                        | 39.6                       | 0                                             | 0                                              | 0.57                      | 0                                            |                     | 0                                            |                                    |                                   | 0                                       | 0                                              |                          | 0.00                           | 5.06                           |                    | 1.14                                | 3.92                           | -5.06                            | -1.14                         |         |
| 264              | 1975 | Ge Changliang                     |                 | teacher                  |                       | 0                      |                       |                         | 0                              |                           |                           |                                | 0                                      |                           |                                  |                        |                                      |                                      |                                         |                                 |                                                       | 0                                        | 39.6                       | 0                                             | 0                                              | 0.57                      | 0                                            |                     | 0                                            |                                    |                                   | 0                                       | 0                                              |                          | 0.00                           | 28.68                          |                    |                                     | 28.68                          |                                  | 28.68                         |         |
| 265              | 1975 | Liu Baochang                      | 1               | poor peasant             | 14                    | 2                      | 1                     | 1                       | 3                              | 1                         |                           | 2                              | 26                                     |                           |                                  |                        | 749                                  |                                      |                                         |                                 | 35                                                    |                                          | 26                         | 39.6                                          | 970                                            | 714                       | 0.57                                         | 407                 |                                              | 1377                               |                                   |                                         | 96                                             | 714                      | 1.01                           | 721.14                         | 18.20              |                                     | 666.39                         | 72.95                            | 331.12                        | 404.07  |
| 266              | 1975 | Wang Wenkui                       | 1               | cadre                    | 14                    | 2                      | 1                     | 1                       | 2                              |                           |                           | 2                              | 20                                     |                           |                                  |                        | 388                                  |                                      |                                         |                                 | 35                                                    |                                          | 20                         | 39.6                                          | 792                                            | 353                       | 0.57                                         | 201                 |                                              | 993                                |                                   |                                         | 192                                            | 353                      | 1.01                           | 356.53                         |                    |                                     | 253.36                         | 103.17                           | 160.75                        | 263.92  |
| 267              | 1975 | Zhao Pingfen                      | 1               | poor peasant             | 14                    | 2                      | 1                     | 1                       | 4                              | 1                         | 1                         | 2                              | 34                                     |                           |                                  |                        | 503                                  |                                      |                                         |                                 | 35                                                    |                                          | 34                         | 39.6                                          | 1346                                           | 468                       | 0.57                                         | 267                 |                                              | 1613                               |                                   |                                         | 288                                            | 468                      | 1.01                           | 472.68                         | 100.00             |                                     | 373.52                         | 199.16                           | 151.00                        | 350.16  |
| 268              | 1975 | Gao Peiseng                       | 1               | poor peasant             | 14                    | 2                      | 1                     | 1                       | 3                              | 1                         |                           | 2                              | 26                                     |                           |                                  |                        | 468                                  |                                      |                                         |                                 | 35                                                    |                                          | 26                         | 39.6                                          | 1030                                           | 433                       | 0.57                                         | 247                 | 30                                           | 1306                               |                                   |                                         | 96                                             | 433                      | 1.01                           | 437.33                         |                    |                                     | 379.61                         | 57.72                            | 296.81                        | 354.53  |
| 269              | 1975 | Gao Peilin                        | 1               | poor peasant             | 14                    | 2                      | 1                     | 1                       | 4                              | 2                         |                           | 2                              | 32                                     |                           |                                  |                        | 649                                  |                                      |                                         |                                 | 35                                                    |                                          | 32                         | 39.6                                          | 1267                                           | 614                       | 0.57                                         | 350                 | 30                                           | 1647                               |                                   |                                         | 192                                            | 614                      | 1.01                           | 620.14                         |                    |                                     | 474.23                         | 145.91                           | 205.24                        | 351.15  |
| 270              | 1975 | Meng Fangli                       | 1               | middle-class peasant     | 4                     | 1                      | 0                     | 1                       | 5                              | 2                         |                           | 3                              | 42                                     |                           |                                  |                        | 83                                   |                                      |                                         |                                 | 10                                                    |                                          | 42                         | 39.6                                          | 1663                                           | 73                        | 0.57                                         | 42                  |                                              | 1705                               |                                   |                                         | 288                                            | 73                       | 1.01                           | 73.73                          | 215.00             |                                     | 266.31                         | 22.42                            | -23.01                        | -0.59   |
| 271              | 1975 | Lan Weiyong                       | 1               | poor peasant             | 4                     | 1                      | 0                     | 1                       | 3                              | 1                         | 1                         | 1                              | 24                                     |                           |                                  |                        | 88                                   |                                      |                                         |                                 | 10                                                    |                                          | 24                         | 39.6                                          | 950                                            | 78                        | 0.57                                         | 44                  |                                              | 995                                |                                   |                                         | 288                                            | 78                       | 1.01                           | 78.78                          | 115.00             |                                     | 176.82                         | 16.96                            | -0.81                         | 16.15   |
| 272              | 1975 | Meng Tianyu                       | 1               | poor peasant             | 14                    | 2                      | 1                     | 1                       | 4                              | 2                         |                           | 2                              | 32                                     |                           |                                  |                        | 432                                  |                                      |                                         |                                 | 35                                                    |                                          | 32                         | 39.6                                          | 1267                                           | 397                       | 0.57                                         | 223                 |                                              | 1490                               |                                   |                                         | 192                                            | 397                      | 1.01                           | 400.97                         |                    |                                     | 321.95                         | 79.02                            | 209.68                        | 288.70  |
| 273              | 1975 | Wang Yongmei                      | 1               | teacher                  |                       | 0                      |                       |                         | 0                              |                           |                           |                                | 0                                      |                           |                                  |                        |                                      |                                      |                                         |                                 |                                                       | 0                                        | 39.6                       | 0                                             | 0                                              | 0.57                      | 0                                            |                     | 0                                            |                                    |                                   | 0                                       | 0                                              |                          | 0.00                           | 23.11                          |                    |                                     | 23.11                          | -23.11                           | 0.00                          |         |
| 274              | 1975 | Wang Chuanding                    | 2               | teacher                  |                       | 0                      |                       |                         | 0                              |                           |                           |                                | 0                                      |                           |                                  |                        |                                      |                                      |                                         |                                 |                                                       | 0                                        | 39.6                       | 0                                             | 0                                              | 0.57                      | 0                                            |                     | 0                                            |                                    |                                   | 0                                       | 0                                              |                          | 0.00                           |                                |                    | 21.88                               | -21.88                         | -2.76                            | -24.64                        |         |
| 276              | 1975 | Cui Yili                          | 2               | poor peasant             | 14                    | 2                      | 1                     | 1                       | 2                              |                           |                           | 2                              | 20                                     |                           |                                  |                        | 611                                  |                                      |                                         |                                 | 35                                                    |                                          | 20                         | 39.6                                          | 792                                            | 576                       | 0.77                                         | 444                 |                                              | 1236                               |                                   |                                         | 96                                             | 576                      | 1.03                           | 593.28                         | 2.23               |                                     | 680.67                         | -85.16                           | 100.26                        | 15.10   |
| 277              | 1975 | Liu Xiangting                     | 2               | poor peasant             | 4                     | 1                      | 0                     | 1                       | 3                              | 1                         | 1                         | 1                              | 24                                     |                           |                                  |                        | 244                                  |                                      |                                         |                                 | 10                                                    |                                          | 24                         | 39.6                                          | 950                                            | 234                       | 0.77                                         | 180                 |                                              | 1131                               |                                   |                                         | 192                                            | 234                      | 1.03                           | 241.02                         |                    |                                     | 194.64                         | 46.38                            | 95.91                         | 142.29  |
| 278              | 1975 | Meng Hulin                        | 2               | poor peasant             | 14                    | 1                      | 0                     | 1                       | 1                              | 1                         |                           | 2                              | 26                                     |                           |                                  |                        | 380                                  |                                      |                                         |                                 | 35                                                    |                                          | 26                         | 39.6                                          | 1030                                           | 345                       | 0.77                                         | 266                 |                                              | 1295                               |                                   |                                         | 96                                             | 345                      | 1.03                           | 355.35                         |                    |                                     | 292.45                         | 62.90                            | 131.90                        | 194.80  |
| 279              | 1975 | Gui Haigeng                       | 1               | poor peasant             |                       | 0                      |                       |                         | 0                              |                           |                           |                                | 0                                      |                           |                                  |                        |                                      |                                      |                                         |                                 |                                                       | 0                                        | 39.6                       | 0                                             | 0                                              | 0.57                      | 0                                            |                     | 0                                            |                                    |                                   | 0                                       | 0                                              |                          | 0.00                           |                                |                    | 0.00                                |                                | 0.00                             |                               |         |
| 280              | 1975 | Meng Tianfu                       | 2               | poor peasant             | 14.5                  | 3                      | 1                     | 2                       | 8                              | 2                         | 1                         | 5                              | 70                                     |                           |                                  |                        | 578                                  |                                      |                                         |                                 | 36                                                    |                                          | 70                         | 39.6                                          | 2772                                           | 542                       | 0.77                                         | 417                 |                                              | 3189                               |                                   |                                         | 672                                            | 542                      | 1.03                           | 558.26                         |                    |                                     | 634.96                         | -76.70                           | 40.34                         | -36.36  |
| 282              | 1975 | Liu Peiyi                         | 1               | poor peasant             | 14                    | 2                      | 1                     | 1                       | 5                              | 1                         | 1                         | 3                              | 44                                     |                           |                                  |                        | 632                                  |                                      |                                         |                                 | 35                                                    |                                          | 44                         | 39.6                                          | 1742                                           | 597                       | 0.57                                         | 340                 | 30                                           | 2113                               |                                   |                                         | 384                                            | 597                      | 1.01                           | 602.97                         | 0.15               |                                     | 461.56                         | 141.56                           | -94.60                        | 46.96   |
| 283              | 1975 | Wang Jie                          | 1               | poor peasant             | 4                     | 1                      | 0                     | 1                       | 2                              |                           | 1                         | 1                              | 18                                     |                           |                                  |                        | 133                                  |                                      |                                         |                                 | 10                                                    |                                          | 18                         | 39.6                                          | 713                                            | 123                       | 0.57                                         | 70                  |                                              | 783                                |                                   |                                         | 288                                            | 123                      | 1.01                           | 124.23                         | 0.15               |                                     | 154.14                         | -29.76                           | 72.33                         | 42.57   |
| 284              | 1975 | Zhang Guangxue                    | 1               |                          | 10                    | 1                      | 1                     | 0                       | 1                              |                           |                           | 1                              | 10                                     |                           |                                  |                        |                                      |                                      |                                         |                                 | 25                                                    |                                          | 10                         | 39.6                                          | 396                                            |                           | 0.57                                         | 0                   |                                              | 396                                |                                   |                                         | 96                                             | 0                        |                                | 0.00                           | 9.37               |                                     | 34.95                          | -25.58                           |                               | -25.58  |
| 285              | 1975 | Wu Weiyi                          | 2               |                          | 16.5                  | 3                      | 1                     | 2                       | 6                              | 1                         |                           | 5                              | 56                                     |                           |                                  |                        | 655                                  |                                      |                                         |                                 | 41                                                    |                                          | 56                         | 39.6                                          | 2196                                           | 614                       | 0.77                                         | 473                 |                                              | 2671                               |                                   |                                         | 384                                            | 614                      | 1.03                           | 632.42                         |                    |                                     | 514.55                         | 117.87                           | -34.00                        | 83.87   |

(cont.)

| Household number | Year | Name of the head of the household | Production team | Class status (1)     | Basic work points (2) | Total labor forces (3) | Male labor forces (4) | Female labor forces (5) | Total household population (6) | Age: 1 to 3 years old (7) | Age: 4 to 7 years old (8) | Age: 8 years old and above (9) | Work points of grain distribution (10) | Laboring work points (11) | Farmyard manure work points (12) | Total work points (13) | Work points of compulsory labor (14) | Work points of help cultivation (15) | Work points of private plots labor (16) | Total deducted work points (17) | Actual workdays of participation in distribution (18) | Workpoints for rations distribution (19) | Rations per workpoint (20) | Total rations received from distribution (21) | Workdays of participation in distribution (22) | Grains per workpoint (23) | Total grains distributed by work-points (24) | Grains subsidy (25) | Total Grains received from distribution (26) | Distributed grains per person (27) | Distributed grains per adult (28) | Grains received from private plots (29) | Workdays of participation in distribution (30) | Value per workpoint (31) | Total value of workpoints (32) | Money used for investment (33) | Sum of income (34) | Money distributed in this year (34) | Deposit/ debt of this year (35) | Deposit/ debt over the years (36) | Accumulated deposit/debt (37) |          |        |
|------------------|------|-----------------------------------|-----------------|----------------------|-----------------------|------------------------|-----------------------|-------------------------|--------------------------------|---------------------------|---------------------------|--------------------------------|----------------------------------------|---------------------------|----------------------------------|------------------------|--------------------------------------|--------------------------------------|-----------------------------------------|---------------------------------|-------------------------------------------------------|------------------------------------------|----------------------------|-----------------------------------------------|------------------------------------------------|---------------------------|----------------------------------------------|---------------------|----------------------------------------------|------------------------------------|-----------------------------------|-----------------------------------------|------------------------------------------------|--------------------------|--------------------------------|--------------------------------|--------------------|-------------------------------------|---------------------------------|-----------------------------------|-------------------------------|----------|--------|
| 286              | 1975 | Wang Shusheng                     | 2               | poor peasant         | 14                    | 2                      | 1                     | 1                       | 2                              |                           |                           | 2                              | 20                                     |                           |                                  |                        | 226                                  |                                      |                                         |                                 | 35                                                    |                                          | 20                         | 39.6                                          | 792                                            | 191                       | 0.77                                         | 147                 |                                              | 939                                |                                   |                                         | 192                                            | 191                      | 1.03                           | 196.73                         | 40.00              |                                     | 156.66                          | 80.07                             | -61.41                        | 18.66    |        |
| 287              | 1975 | Niu Rusheng                       | 1               | educated youth       |                       | 0                      |                       |                         | 0                              |                           |                           |                                | 0                                      |                           |                                  |                        |                                      |                                      |                                         |                                 |                                                       | 0                                        | 39.6                       | 0                                             | 0                                              | 0.57                      | 0                                            |                     | 0                                            |                                    |                                   | 0                                       | 0                                              |                          | 0.00                           | 1.50                           |                    | 3.58                                | -2.08                           |                                   | -2.08                         |          |        |
| 288              | 1975 | Yan Lianglian                     |                 | educated youth       |                       | 0                      |                       |                         | 0                              |                           |                           |                                | 0                                      |                           |                                  |                        |                                      |                                      |                                         |                                 |                                                       | 0                                        | 39.6                       | 0                                             | 0                                              | 0.57                      | 0                                            |                     | 0                                            |                                    |                                   | 0                                       | 0                                              |                          | 0.00                           | 7.29                           |                    | 15.13                               | -7.84                           |                                   | -7.84                         |          |        |
| 289              | 1975 | Huang Hailian                     |                 | educated youth       |                       | 0                      |                       |                         | 0                              |                           |                           |                                | 0                                      |                           |                                  |                        |                                      |                                      |                                         |                                 |                                                       | 0                                        | 39.6                       | 0                                             | 0                                              | 0.57                      | 0                                            |                     | 0                                            |                                    |                                   | 0                                       | 0                                              |                          | 0.00                           | 0.25                           |                    | 0.60                                | -0.35                           |                                   | -0.35                         |          |        |
| 290              | 1975 | Zhou Xiuhua                       |                 | educated youth       |                       | 0                      |                       |                         | 0                              |                           |                           |                                | 0                                      |                           |                                  |                        |                                      |                                      |                                         |                                 |                                                       | 0                                        | 39.6                       | 0                                             | 0                                              | 0.57                      | 0                                            |                     | 0                                            |                                    |                                   | 0                                       | 0                                              |                          | 0.00                           | 0.94                           |                    |                                     | 0.94                            |                                   | 0.94                          |          |        |
| 291              | 1975 | Lan Aiyong                        | 2               | educated youth       |                       | 0                      |                       |                         | 1                              |                           |                           | 1                              | 10                                     |                           |                                  |                        | 10                                   |                                      |                                         |                                 |                                                       | 10                                       | 39.6                       | 396                                           | 10                                             | 0.77                      | 8                                            |                     | 404                                          |                                    |                                   | 96                                      | 10                                             | 1.03                     | 10.30                          |                                |                    | 76.41                               | -66.11                          | -1053.03                          | -1119.14                      |          |        |
| 292              | 1975 | Meng Erlin                        | 2               |                      | 14                    | 2                      | 1                     | 1                       | 5                              |                           |                           | 5                              | 50                                     |                           |                                  |                        | 627                                  |                                      |                                         |                                 | 35                                                    |                                          | 50                         | 39.6                                          | 1980                                           | 592                       | 0.57                                         | 456                 | 30                                           | 2466                               |                                   |                                         | 576                                            | 592                      | 1.03                           | 609.76                         |                    |                                     | 687.80                          | -78.04                            | 370.48                        | 292.44   |        |
| 293              | 1975 | Liu Jinting                       | 2               |                      | 14                    | 2                      | 1                     | 1                       | 4                              | 2                         |                           | 2                              | 32                                     |                           |                                  |                        | 639                                  |                                      |                                         |                                 | 35                                                    |                                          | 32                         | 39.6                                          | 1267                                           | 604                       | 0.77                                         | 465                 |                                              | 1732                               |                                   |                                         | 192                                            | 604                      | 1.03                           | 622.12                         |                    |                                     | 506.65                          | 115.47                            | 341.72                        | 457.19   |        |
| 294              | 1975 | Meng Peilin3                      | 2               |                      | 23                    | 4                      | 2                     | 2                       | 4                              |                           |                           | 4                              | 40                                     |                           |                                  |                        | 1213                                 |                                      |                                         |                                 | 58                                                    |                                          | 40                         | 39.6                                          | 1584                                           | 1155                      | 0.77                                         | 889                 | 30                                           | 2503                               |                                   |                                         | 480                                            | 1155                     | 1.03                           | 1189.65                        | 0.15               |                                     | 737.23                          | 452.57                            | 883.39                        | 1335.96  |        |
| 296              | 1975 | Wang Jiantang                     | 2               |                      | 6.5                   | 2                      | 0                     | 2                       | 3                              |                           |                           | 3                              | 30                                     |                           |                                  |                        | 137                                  |                                      |                                         |                                 | 16                                                    |                                          | 30                         | 39.6                                          | 1188                                           | 121                       | 0.77                                         | 93                  |                                              | 1281                               |                                   |                                         | 288                                            | 121                      | 1.03                           | 124.63                         | 60.00              |                                     | 209.98                          | -25.35                            |                               | -25.35   |        |
| 297              | 1975 | Wu Jinxing                        | 2               |                      |                       | 0                      |                       |                         | 0                              |                           |                           |                                | 0                                      |                           |                                  |                        | 310                                  |                                      |                                         |                                 |                                                       | 0                                        | 39.6                       | 0                                             | 310                                            | 0.77                      | 239                                          |                     | 239                                          |                                    |                                   | 0                                       | 310                                            | 1.03                     | 319.30                         |                                |                    |                                     | 319.30                          |                                   | 319.30                        |          |        |
| 1                | 1976 | Meng Tianyun                      | 2               | poor peasant         | 6.5                   | 2                      | 0                     | 2                       | 7                              |                           |                           |                                | 68                                     |                           |                                  |                        | 705                                  |                                      |                                         |                                 | 16                                                    |                                          | 68                         | 39.4                                          | 2679.2                                         | 689                       | 0.58                                         | 400                 |                                              | 3078.82                            | 439.8314286                       |                                         | 472                                            | 689                      | 0.8                            | 551.20                         |                    |                                     | 602.01                          | -50.81                            | 121.72                        | 70.91    |        |
| 2                | 1976 | Yang Fengming                     | 1               | middle-class peasant | 10.5                  | 2                      | 1                     | 1                       | 2                              |                           |                           |                                | 20                                     |                           |                                  |                        | 300                                  |                                      |                                         |                                 | 26                                                    |                                          | 20                         | 39.4                                          | 788                                            | 274                       | 0.65                                         | 178                 |                                              | 966.1                              | 483.05                            |                                         | 118                                            | 274                      | 0.82                           | 224.68                         |                    |                                     | 224.32                          | 0.36                              | 138.99                        | 139.35   |        |
| 3                | 1976 | Li Chengxin                       | 1               | poor peasant         |                       | 0                      |                       |                         |                                |                           |                           |                                |                                        |                           |                                  |                        |                                      |                                      |                                         |                                 |                                                       | 0                                        | 39.4                       | 0                                             | 0                                              | 0.65                      | 0                                            |                     | 0                                            |                                    | #DIV/o!                           | 0                                       | 0                                              | 0.82                     | 0.00                           |                                |                    | 0.00                                | 0.00                            |                                   |                               |          |        |
| 4                | 1976 | Li Zeyong                         | 1               | poor peasant         |                       | 0                      |                       |                         |                                |                           |                           |                                |                                        |                           |                                  |                        |                                      |                                      |                                         |                                 |                                                       | 0                                        | 39.4                       | 0                                             | 0                                              | 0.65                      | 0                                            |                     | 0                                            |                                    | #DIV/o!                           | 0                                       | 0                                              | 0.82                     | 0.00                           |                                |                    | 0.00                                | 0.00                            |                                   |                               |          |        |
| 5                | 1976 | Gao Peizhong                      | 1               | poor peasant         | 20.5                  | 3                      | 2                     | 1                       | 8                              |                           |                           |                                | 78                                     |                           |                                  |                        | 797                                  |                                      |                                         |                                 | 51                                                    |                                          | 78                         | 39.4                                          | 3073.2                                         | 746                       | 0.65                                         | 485                 |                                              | 3558.1                             | 444.7625                          |                                         | 472                                            | 746                      | 0.82                           | 611.72                         |                    |                                     | 688.60                          | -76.88                            | -1176.85                      | -1253.73 |        |
| 6                | 1976 | Kong Qingquan                     | 1               | poor peasant         | 18                    | 3                      | 1                     | 2                       | 5                              |                           |                           |                                | 46                                     |                           |                                  |                        | 523                                  |                                      |                                         |                                 | 45                                                    |                                          | 46                         | 39.4                                          | 1911.4                                         | 478                       | 0.65                                         | 311                 |                                              | 2222.1                             | 444.42                            |                                         | 295                                            | 478                      | 0.82                           | 391.96                         |                    |                                     | 608.92                          | -216.96                           | 389.42                        | 172.46   |        |
| 7                | 1976 | Li Chengren                       | 1               | middle-class peasant |                       | 0                      |                       |                         | 2                              |                           |                           |                                | 20                                     |                           |                                  |                        | 56                                   |                                      |                                         |                                 |                                                       | 20                                       | 39.4                       | 788                                           | 56                                             | 0.65                      | 36                                           |                     | 824.4                                        | 412.2                              |                                   | 118                                     | 56                                             | 0.82                     | 45.92                          | 100                            |                    | 412.65                              | 3.27                            | -364.24                           | -360.97                       |          |        |
| 8                | 1976 | Wu Jixiang                        | 1               | middle-class peasant | 14                    | 0                      |                       |                         | 6                              |                           |                           |                                | 56                                     |                           |                                  |                        | 475                                  |                                      |                                         |                                 | 35                                                    |                                          | 56                         | 39.4                                          | 2206.4                                         | 440                       | 0.65                                         | 286                 |                                              | 2492.4                             | 415.4                             |                                         | 295                                            | 440                      | 0.82                           | 360.80                         | 70                 |                                     | 406.19                          | 24.61                             | 33.56                         | 58.17    |        |
| 9                | 1976 | Kong Fangyu                       | 1               | poor peasant         | 4                     | 1                      | 0                     | 1                       | 3                              |                           |                           |                                | 26                                     |                           |                                  |                        | 1                                    |                                      |                                         |                                 | 10                                                    |                                          | 26                         | 39.4                                          | 1024.4                                         |                           | 0.65                                         | 0                   |                                              | 1024.4                             | 341.4666667                       |                                         | 118                                            | 0                        | 0.82                           | 0.00                           | 379.42             |                                     |                                 | 161.49                            | 217.93                        | -5.27    | 212.66 |
| 10               | 1976 | Gao Wei                           | 1               | poor peasant         | 20.5                  | 4                      | 1                     | 3                       | 6                              |                           |                           |                                | 56                                     |                           |                                  |                        | 975                                  |                                      |                                         |                                 | 51                                                    |                                          | 56                         | 39.4                                          | 2150.4                                         | 924                       | 0.65                                         | 601                 |                                              | 2751                               | 458.5                             |                                         | 354                                            | 924                      | 0.82                           | 757.68                         |                    |                                     | 778.60                          | -20.92                            | 647.32                        | 626.40   |        |
| 11               | 1976 | Gao Jun                           | 1               | poor peasant         |                       | 0                      |                       |                         | 1                              |                           |                           |                                | 10                                     |                           |                                  |                        |                                      |                                      |                                         |                                 |                                                       | 10                                       | 39.4                       | 394                                           |                                                | 0.65                      | 0                                            |                     | 394                                          |                                    | 394                               |                                         | 59                                             | 0                        | 0.82                           | 0.00                           |                    |                                     | 96.21                           | -96.21                            | 124.28                        | 28.07    |        |
| 12               | 1976 | Gao Peixiao                       | 1               | poor peasant         | 14                    | 2                      | 1                     | 1                       | 6                              |                           |                           |                                | 54                                     |                           |                                  |                        | 656                                  |                                      |                                         |                                 | 35                                                    |                                          | 54                         | 39.4                                          | 2127.6                                         | 621                       | 0.65                                         | 404                 |                                              | 2531.25                            | 421.875                           |                                         | 295                                            | 621                      | 0.82                           | 509.22                         |                    |                                     | 747.27                          | -238.05                           | 478.92                        | 240.87   |        |
| 13               | 1976 | Gao Shang                         | 1               | poor peasant         | 14                    | 0                      |                       |                         | 5                              |                           |                           |                                | 44                                     |                           |                                  |                        | 546                                  |                                      |                                         |                                 | 35                                                    |                                          | 44                         | 39.4                                          | 1733.6                                         | 511                       | 0.65                                         | 332                 |                                              | 2065.75                            | 413.15                            |                                         | 295                                            | 511                      | 0.82                           | 419.02                         |                    |                                     | 505.25                          | -86.23                            | 276.68                        | 190.45   |        |
| 14               | 1976 | Mu Zhaolin                        | 1               | poor peasant         | 14                    | 2                      | 1                     | 1                       |                                |                           |                           |                                |                                        |                           |                                  |                        |                                      |                                      |                                         |                                 |                                                       | 0                                        | 39.4                       | 0                                             | 0                                              | 0.65                      | 0                                            |                     | 0                                            |                                    | #DIV/o!                           | 0                                       | 0                                              | 0.82                     | 0.00                           |                                |                    | 0.00                                | 0.00                            |                                   |                               |          |        |
| 15               | 1976 | Cao Cuizhen                       | 2               | poor peasant         | 12.5                  | 0                      |                       |                         | 5                              |                           |                           |                                | 50                                     |                           |                                  |                        | 786                                  |                                      |                                         |                                 | 31                                                    |                                          | 50                         | 39.4                                          | 1970                                           | 755                       | 0.58                                         | 438                 |                                              | 2407.9                             | 481.58                            |                                         | 354                                            | 755                      | 0.8                            | 604.00                         |                    |                                     | 836.66                          | -232.66                           | 803.49                        | 570.83   |        |
| 16               | 1976 | Cao Jianren                       | 2               | poor peasant         | 14                    | 2                      | 1                     | 1                       | 6                              |                           |                           |                                | 58                                     |                           |                                  |                        | 676                                  |                                      |                                         |                                 | 35                                                    |                                          | 58                         | 39.4                                          | 2285.2                                         | 641                       | 0.58                                         | 417                 |                                              | 2202.2                             | 367.0333333                       |                                         | 354                                            | 641                      | 0.82                           | 525.62                         |                    |                                     | 662.30                          | -136.68                           | 256.61                        | 119.93   |        |
| 17               | 1976 | Liu Guifu                         | 1               | poor peasant         |                       | 0                      |                       |                         |                                |                           |                           |                                |                                        |                           |                                  |                        |                                      |                                      |                                         |                                 |                                                       | 0                                        | 39.4                       | 0                                             | 0                                              | 0.65                      | 0                                            |                     | 0                                            |                                    | #DIV/o!                           | 0                                       | 0                                              | 0.82                     | 0.00                           |                                |                    | 0.00                                | 0.00                            |                                   |                               |          |        |
| 18               | 1976 | Meng Mingde                       | 1               | poor peasant         | 12.5                  | 0                      |                       |                         | 6                              |                           |                           |                                | 60                                     |                           |                                  |                        | 860                                  |                                      |                                         |                                 | 25                                                    |                                          | 60                         | 39.4                                          | 2364                                           | 835                       | 0.65                                         | 543                 |                                              | 2906.75                            | 484.4583333                       |                                         | 354                                            | 835                      | 0.82                           | 684.70                         |                    |                                     | 987.13                          | -302.43                           | 1153.90                       | 851.47   |        |

(cont.)

| Household number | Year | Name of the head of the household | Production team | Class status (1)         | Basic work points (2) | Total labor forces (3) | Male labor forces (4) | Female labor forces (5) | Total household population (6) | Age: 1 to 3 years old (7) | Age: 4 to 7 years old (8) | Age: 8 years old and above (9) | Work points of grain distribution (10) | Laboring work points (11) | Farmyard manure work points (12) | Total work points (13) | Work points of compulsory labor (14) | Work points of help cultivation (15) | Work points of private plots labor (16) | Total deducted work points (17) | Actual workdays of participation in distribution (18) | Workpoints for rations distribution (19) | Rations per workpoint (20) | Total rations received from distribution (21) | Workdays of participation in distribution (22) | Grains per workpoint (23) | Total grains distributed by work-points (24) | Grains subsidy (25) | Total Grains received from distribution (26) | Distributed grains per person (27) | Distributed grains per adult (28) | Grains received from private plots (29) | Workdays of participation in distribution (30) | Value per workpoint (31) | Total value of workpoints (32) | Money used for investment (33) | Sum of income (34) | Money distributed in this year (34) | Deposit/debt of this year (35) | Deposit/debt over the years (36) | Accumulated deposit/debt (37) |
|------------------|------|-----------------------------------|-----------------|--------------------------|-----------------------|------------------------|-----------------------|-------------------------|--------------------------------|---------------------------|---------------------------|--------------------------------|----------------------------------------|---------------------------|----------------------------------|------------------------|--------------------------------------|--------------------------------------|-----------------------------------------|---------------------------------|-------------------------------------------------------|------------------------------------------|----------------------------|-----------------------------------------------|------------------------------------------------|---------------------------|----------------------------------------------|---------------------|----------------------------------------------|------------------------------------|-----------------------------------|-----------------------------------------|------------------------------------------------|--------------------------|--------------------------------|--------------------------------|--------------------|-------------------------------------|--------------------------------|----------------------------------|-------------------------------|
| 19               | 1976 | Mu Shouliang                      | 1               | poor peasant             |                       | 0                      |                       |                         | 2                              |                           |                           |                                | 20                                     |                           |                                  |                        |                                      |                                      |                                         |                                 |                                                       | 20                                       | 39.4                       | 788                                           | 0                                              | 0.65                      | 0                                            | 788                 | 394                                          |                                    | 118                               | 0                                       | 0.82                                           | 0.00                     |                                | 149.84                         | -149.84            | -503.20                             | -653.04                        |                                  |                               |
| 20               | 1976 | Meng Mingbao                      | 1               | poor peasant             | 20.5                  | 3                      | 2                     | 1                       | 3                              |                           |                           |                                | 30                                     |                           |                                  |                        | 592                                  |                                      |                                         | 51                              |                                                       | 30                                       | 39.4                       | 1182                                          | 541                                            | 0.65                      | 352                                          | 1533.65             | 511.2166667                                  | 177                                | 541                               | 0.82                                    | 443.62                                         |                          | 517.67                         | -74.05                         | 917.20             | 843.15                              |                                |                                  |                               |
| 21               | 1976 | Meng Mingjin                      | 2               | poor peasant             |                       | 0                      |                       |                         | 1                              |                           |                           |                                | 10                                     |                           |                                  | 151                    |                                      |                                      |                                         |                                 | 10                                                    | 39.4                                     | 394                        | 151                                           | 0.58                                           | 88                        | 481.58                                       | 481.58              | 118                                          | 151                                | 0.8                               | 120.80                                  |                                                | 148.39                   | -27.59                         | 4.25                           | -23.34             |                                     |                                |                                  |                               |
| 22               | 1976 | Liang Shiren                      | 1               | low-middle-class peasant |                       | 0                      |                       |                         | 1                              |                           |                           |                                | 10                                     |                           |                                  |                        |                                      |                                      |                                         |                                 | 10                                                    | 39.4                                     | 394                        | 0                                             | 0.65                                           | 0                         | 394                                          | 394                 |                                              | 118                                | 0                                 | 0.82                                    | 0.00                                           |                          | 158.77                         | -158.77                        | -264.83            | -423.60                             |                                |                                  |                               |
| 23               | 1976 | Liang Yingfu                      | 1               | low-middle-class peasant | 20                    | 2                      | 2                     | 0                       | 4                              |                           |                           |                                | 40                                     |                           |                                  |                        | 904                                  |                                      |                                         | 50                              |                                                       | 40                                       | 39.4                       | 1576                                          | 854                                            | 0.65                      | 555                                          | 2131.1              | 532.775                                      | 236                                | 854                               | 0.82                                    | 700.28                                         |                          | 399.81                         | 300.47                         | 28.74              | 329.21                              |                                |                                  |                               |
| 24               | 1976 | Lei Guangzhi                      | 1               | low-middle-class peasant | 17                    | 0                      |                       |                         | 2                              |                           |                           |                                | 20                                     |                           |                                  |                        | 536                                  |                                      |                                         | 45                              |                                                       | 20                                       | 39.4                       | 788                                           | 491                                            | 0.65                      | 319                                          | 1107.15             | 553.575                                      | 118                                | 491                               | 0.82                                    | 402.62                                         |                          | 266.90                         | 135.72                         | -216.24            | -80.52                              |                                |                                  |                               |
| 25               | 1976 | Fan Lishi                         | 1               | middle-class peasant     | 24.5                  | 4                      | 2                     | 2                       | 6                              |                           |                           |                                | 60                                     |                           |                                  | 1282                   |                                      |                                      | 61                                      |                                 | 60                                                    | 39.4                                     | 2364                       | 1221                                          | 0.65                                           | 794                       | 3157.65                                      | 526.275             | 354                                          | 1221                               | 0.82                              | 1001.22                                 |                                                | 893.02                   | 108.20                         | 1078.22                        | 1186.42            |                                     |                                |                                  |                               |
| 26               | 1976 | Zhang Quangui                     | 1               | middle-class peasant     |                       | 0                      |                       |                         | 1                              |                           |                           |                                | 10                                     |                           |                                  |                        |                                      |                                      |                                         |                                 | 10                                                    | 39.4                                     | 394                        | 0                                             | 0.65                                           | 0                         | 394                                          | 394                 | 59                                           | 0                                  | 0.82                              | 0.00                                    |                                                | 70.78                    | -70.78                         | -8.01                          | -78.79             |                                     |                                |                                  |                               |
| 27               | 1976 | Wang Bangjie                      | 1               | low-middle-class peasant | 14                    | 2                      | 1                     | 1                       | 4                              |                           |                           |                                | 38                                     |                           |                                  | 613                    |                                      |                                      | 35                                      |                                 | 38                                                    | 39.4                                     | 1497.2                     | 578                                           | 0.65                                           | 376                       | 1872.9                                       | 468.225             | 236                                          | 578                                | 0.82                              | 473.96                                  |                                                | 643.07                   | -169.11                        | 405.18                         | 236.07             |                                     |                                |                                  |                               |
| 28               | 1976 | Meng Tianxing                     | 1               | low-middle-class peasant | 14                    | 0                      |                       |                         | 7                              |                           |                           |                                | 64                                     |                           |                                  | 597                    |                                      |                                      | 35                                      |                                 | 64                                                    | 39.4                                     | 2521.6                     | 562                                           | 0.65                                           | 365                       | 2886.9                                       | 412.4142857         | 354                                          | 562                                | 0.82                              | 460.84                                  |                                                | 576.13                   | -115.29                        | -61.23                         | -176.52            |                                     |                                |                                  |                               |
| 29               | 1976 | Xue Baolin                        | 1               | low-middle-class peasant | 4                     | 1                      | 0                     | 1                       | 5                              |                           |                           |                                | 50                                     |                           |                                  | 151                    |                                      |                                      | 10                                      |                                 | 50                                                    | 39.4                                     | 1970                       | 141                                           | 0.65                                           | 92                        | 2061.65                                      | 412.33              | 295                                          | 141                                | 0.82                              | 115.62                                  | 280                                            | 324.46                   | 71.16                          | -22.95                         | 48.21              |                                     |                                |                                  |                               |
| 30               | 1976 | Cao Cuiheng                       | 1               | low-middle-class peasant |                       | 0                      |                       |                         | 2                              |                           |                           |                                | 20                                     |                           |                                  | 284                    |                                      |                                      |                                         |                                 | 20                                                    | 39.4                                     | 788                        | 284                                           | 0.65                                           | 185                       | 972.6                                        | 486.3               | 118                                          | 284                                | 0.82                              | 232.88                                  |                                                | 208.21                   | 24.67                          | 271.24                         | 295.91             |                                     |                                |                                  |                               |
| 31               | 1976 | Ma Hongxiang                      | 1               | low-middle-class peasant | 4                     | 1                      | 0                     | 1                       | 4                              |                           |                           |                                | 34                                     |                           |                                  | 36                     |                                      |                                      | 10                                      |                                 | 34                                                    | 39.4                                     | 1339.6                     | 26                                            | 0.65                                           | 17                        | 1356.5                                       | 339.125             | 236                                          | 26                                 | 0.82                              | 21.32                                   | 85                                             | 197.27                   | -90.95                         | 20.62                          | -70.33             |                                     |                                |                                  |                               |
| 32               | 1976 | Ruan Baorong                      | 1               | low-middle-class peasant | 24                    | 3                      | 2                     | 1                       | 4                              |                           |                           |                                | 40                                     |                           |                                  | 900                    |                                      |                                      | 25                                      |                                 | 40                                                    | 39.4                                     | 1576                       | 875                                           | 0.65                                           | 569                       | 2144.75                                      | 536.1875            | 236                                          | 875                                | 0.82                              | 717.50                                  |                                                | 813.04                   | -95.54                         | 1452.41                        | 1356.87            |                                     |                                |                                  |                               |
| 33               | 1976 | Cao Jianguo                       | 1               | low-middle-class peasant | 14                    | 2                      | 1                     | 1                       | 8                              |                           |                           |                                | 74                                     |                           |                                  | 488                    |                                      |                                      | 35                                      |                                 | 74                                                    | 39.4                                     | 2915.6                     | 453                                           | 0.65                                           | 294                       | 3210.05                                      | 401.25625           | 472                                          | 453                                | 0.82                              | 371.46                                  |                                                | 590.12                   | -218.66                        | -193.39                        | -412.05            |                                     |                                |                                  |                               |
| 34               | 1976 | Liu Jinliang                      | 1               | poor peasant             | 5                     | 2                      | 0                     | 2                       | 5                              |                           |                           |                                | 50                                     |                           |                                  | 500                    |                                      |                                      | 13                                      |                                 | 50                                                    | 39.4                                     | 1970                       | 487                                           | 0.65                                           | 317                       | 2286.55                                      | 457.31              | 295                                          | 487                                | 0.82                              | 399.34                                  |                                                | 522.88                   | -123.54                        | 507.79                         | 384.25             |                                     |                                |                                  |                               |
| 35               | 1976 | Shi Baoshou                       | 1               | low-middle-class peasant | 20                    | 4                      | 1                     | 3                       | 8                              |                           |                           |                                | 28                                     |                           |                                  | 1069                   |                                      |                                      | 50                                      |                                 | 78                                                    | 39.4                                     | 3073.2                     | 1019                                          | 0.65                                           | 662                       | 3735.55                                      | 466.94375           | 472                                          | 1019                               | 0.82                              | 835.58                                  | 20                                             | 799.34                   | 56.24                          | -907.52                        | -851.28            |                                     |                                |                                  |                               |
| 36               | 1976 | Wang Qiding                       | 2               | low-middle-class peasant |                       | 0                      |                       |                         |                                |                           |                           |                                |                                        |                           |                                  |                        |                                      |                                      |                                         |                                 | 0                                                     | 39.4                                     | 0                          | 0                                             | 0.58                                           | 0                         | 0                                            | #DIV/0!             | 0                                            | 0                                  | 0.8                               | 0.00                                    |                                                |                          | 0.00                           |                                | 0.00               |                                     |                                |                                  |                               |

(cont.)

| Household number | Year | Name of the head of the household | Production team | Class status (1)           | Basic work points (2) | Total labor forces (3) | Male labor forces (4) | Female labor forces (5) | Total household population (6) | Age: 1 to 3 years old (7) | Age: 4 to 7 years old (8) | Age: 8 years old and above (9) | Work points of grain distribution (10) | Laboring work points (11) | Farmyard manure work points (12) | Total work points (13) | Work points of compulsory labor (14) | Work points of help cultivation (15) | Work points of private plots labor (16) | Total deducted work points (17) | Acutal workdays of participation in distribution (18) | Workpoints for rations distribution (19) | Rations per workpoint (20) | Total rations received form distribution (21) | Workdays of participation in distribu-tion (22) | Grains per workpoint (23) | Total grains distributed by work-points (24) | Grains subsidy (25) | Total Grains received from distribution (26) | Distributed grains per person (27) | Distributed grains per adult (28) | Grains received from privated plots (29) | Workdays of participation in distribution (30) | Value per workpoint (31) | Total value of workpoints (32) | Money used for investment (33) | Sum of income (34) | Money distributed in this year (34) | Deposit/ debt of this year (35) | Deposit/ debt over the years (36) | Accumulated deposit/debt (37) |
|------------------|------|-----------------------------------|-----------------|----------------------------|-----------------------|------------------------|-----------------------|-------------------------|--------------------------------|---------------------------|---------------------------|--------------------------------|----------------------------------------|---------------------------|----------------------------------|------------------------|--------------------------------------|--------------------------------------|-----------------------------------------|---------------------------------|-------------------------------------------------------|------------------------------------------|----------------------------|-----------------------------------------------|-------------------------------------------------|---------------------------|----------------------------------------------|---------------------|----------------------------------------------|------------------------------------|-----------------------------------|------------------------------------------|------------------------------------------------|--------------------------|--------------------------------|--------------------------------|--------------------|-------------------------------------|---------------------------------|-----------------------------------|-------------------------------|
| 37               | 1976 | Yu Zhankui                        | 1               | poor peasant               | 4                     | 1                      | 0                     | 1                       | 5                              |                           |                           |                                | 48                                     |                           |                                  |                        | 168                                  |                                      |                                         | 10                              |                                                       | 48                                       | 39.4                       | 1891.2                                        | 158                                             | 0.65                      | 103                                          | 1993.9              | 398.78                                       |                                    | 295                               | 158                                      | 0.82                                           | 129.56                   | 143.2                          |                                | 317.18             | -44.42                              | -106.07                         | -150.49                           |                               |
| 38               | 1976 | Liu Yucan                         | 1               | poor peasant               | 14                    | 2                      | 1                     | 1                       | 7                              |                           |                           |                                | 64                                     |                           |                                  |                        | 582                                  |                                      |                                         | 10                              |                                                       | 64                                       | 39.4                       | 2521.6                                        | 572                                             | 0.65                      | 372                                          | 2893.4              | 413.3428571                                  |                                    | 413                               | 572                                      | 0.82                                           | 469.04                   | 35                             |                                | 639.96             | -135.92                             | -508.99                         | -644.91                           |                               |
| 39               | 1976 | Liu Guiting                       | 1               | middle-class peasant       |                       | 0                      |                       |                         | 3                              |                           |                           |                                | 30                                     |                           |                                  |                        | 473                                  |                                      |                                         |                                 |                                                       | 30                                       | 39.4                       | 1182                                          | 473                                             | 0.65                      | 307                                          | 1489.45             | 496.4833333                                  |                                    | 177                               | 473                                      | 0.82                                           | 387.86                   |                                |                                | 466.71             | -78.85                              | 413.39                          | 334.54                            |                               |
| 40               | 1976 | Liu Chengze                       | 1               | middle-class peasant       |                       | 0                      |                       |                         | 1                              |                           |                           |                                | 10                                     |                           |                                  |                        | 132                                  |                                      |                                         | 10                              |                                                       | 10                                       | 39.4                       | 394                                           | 132                                             | 0.65                      | 86                                           | 479.8               | 479.8                                        |                                    | 59                                | 132                                      | 0.82                                           | 108.24                   |                                |                                | 146.69             | -38.45                              | 143.72                          | 105.27                            |                               |
| 41               | 1976 | Li Jinhu                          | 1               | middle-class peasant       | 10                    | 1                      | 1                     | 0                       | 2                              |                           |                           |                                | 20                                     |                           |                                  |                        | 486                                  |                                      |                                         | 25                              |                                                       | 20                                       | 39.4                       | 788                                           | 461                                             | 0.65                      | 300                                          | 1087.65             | 543.825                                      |                                    | 118                               | 461                                      | 0.82                                           | 378.02                   |                                |                                | 484.39             | -106.37                             | 342.02                          | 235.65                            |                               |
| 42               | 1976 | Meng Xiqing                       | 1               | poor peasant               | 24                    | 0                      |                       |                         | 7                              |                           |                           |                                | 70                                     |                           |                                  |                        | 1072                                 |                                      |                                         | 60                              |                                                       | 70                                       | 39.4                       | 2758                                          | 1012                                            | 0.65                      | 658                                          | 3415.8              | 487.9714286                                  |                                    | 413                               | 1012                                     | 0.82                                           | 829.84                   |                                |                                | 854.90             | -25.06                              | 473.19                          | 448.13                            |                               |
| 43               | 1976 | Li Shucheng                       | 1               | poor peasant               | 12                    | 2                      | 1                     | 1                       | 5                              |                           |                           |                                | 50                                     |                           |                                  |                        | 875                                  |                                      |                                         |                                 |                                                       | 50                                       | 39.4                       | 1970                                          | 875                                             | 0.65                      | 569                                          | 2538.75             | 507.75                                       |                                    | 413                               | 875                                      | 0.82                                           | 717.50                   |                                |                                | 693.38             | 24.12                               | 636.44                          | 660.56                            |                               |
| 44               | 1976 | Wang Guiying                      | 1               | low-middle-class peasant   | 18                    | 3                      | 1                     | 2                       | 5                              |                           |                           |                                | 44                                     |                           |                                  |                        | 598                                  |                                      |                                         | 45                              |                                                       | 44                                       | 39.4                       | 1733.6                                        | 553                                             | 0.65                      | 359                                          | 2093.05             | 418.61                                       |                                    | 295                               | 553                                      | 0.82                                           | 453.46                   |                                |                                | 559.07             | -105.61                             | 542.66                          | 437.05                            |                               |
| 45               | 1976 | Zuo Yunxian                       | 1               | upper-middle-class peasant | 44                    | 7                      | 3                     | 4                       | 10                             |                           |                           |                                | 98                                     |                           |                                  |                        | 1919                                 |                                      |                                         | 110                             |                                                       | 98                                       | 39.4                       | 3861.2                                        | 1809                                            | 0.65                      | 1176                                         | 5037.05             | 503.705                                      |                                    | 590                               | 1809                                     | 0.82                                           | 1483.38                  |                                |                                | 1329.73            | 153.65                              | 1812.92                         | 1966.57                           |                               |
| 46               | 1976 | Gao Peijie                        | 1               | poor peasant               | 10                    | 1                      | 1                     | 0                       | 2                              |                           |                           |                                | 20                                     |                           |                                  |                        | 330                                  |                                      |                                         | 25                              |                                                       | 20                                       | 39.4                       | 788                                           | 305                                             | 0.65                      | 198                                          | 986.25              | 493.125                                      |                                    | 118                               | 305                                      | 0.82                                           | 250.10                   |                                |                                | 289.96             | -39.86                              | 202.22                          | 162.36                            |                               |
| 47               | 1976 | Wang Qisheng                      | 1               | poor peasant               | 12.5                  | 2                      | 1                     | 1                       | 6                              |                           |                           |                                | 58                                     |                           |                                  |                        | 478                                  |                                      |                                         | 31                              |                                                       | 58                                       | 39.4                       | 2285.2                                        | 447                                             | 0.65                      | 291                                          | 2575.75             | 429.2916667                                  |                                    | 354                               | 447                                      | 0.82                                           | 366.54                   |                                |                                | 501.30             | -134.76                             | -597.26                         | -732.02                           |                               |
| 48               | 1976 | Chen Yuzhong                      | 2               | poor peasant               | 16                    | 3                      | 1                     | 2                       | 6                              |                           |                           |                                | 60                                     |                           |                                  |                        | 838                                  |                                      |                                         | 40                              |                                                       | 60                                       | 39.4                       | 2364                                          | 798                                             | 0.58                      | 463                                          | 2826.84             | 471.14                                       |                                    | 354                               | 798                                      | 0.8                                            | 638.40                   |                                |                                | 628.67             | 9.73                                | 220.30                          | 230.03                            |                               |
| 49               | 1976 | Meng Tianchang                    | 2               | poor peasant               | 14                    | 2                      | 1                     | 1                       | 6                              |                           |                           |                                | 54                                     |                           |                                  |                        | 523                                  |                                      |                                         | 35                              |                                                       | 54                                       | 39.4                       | 2127.6                                        | 488                                             | 0.58                      | 283                                          | 2410.64             | 401.7733333                                  |                                    | 295                               | 488                                      | 0.8                                            | 390.40                   |                                |                                | 553.75             | -163.35                             | -174.13                         | -337.48                           |                               |
| 50               | 1976 | Wang Xizhi                        | 2               | middle-class peasant       | 6.5                   | 2                      | 0                     | 2                       | 5                              |                           |                           |                                | 50                                     |                           |                                  |                        | 637                                  |                                      |                                         | 16                              |                                                       | 50                                       | 39.4                       | 1970                                          | 621                                             | 0.58                      | 360                                          | 2330.18             | 466.036                                      |                                    | 413                               | 621                                      | 0.8                                            | 496.80                   |                                |                                | 547.97             | -51.17                              | 172.27                          | 121.10                            |                               |
| 51               | 1976 | Jia Jinkui                        | 2               | low-middle-class peasant   |                       | 0                      |                       |                         |                                |                           |                           |                                |                                        |                           |                                  |                        |                                      |                                      |                                         |                                 |                                                       | 0                                        | 39.4                       | 0                                             | 0                                               | 0.58                      | 0                                            | 0                   | #DIV/0!                                      |                                    | 0                                 | 0                                        | 0.8                                            | 0.00                     |                                |                                |                    | 0.00                                |                                 | 0.00                              |                               |
| 52               | 1976 | Ji Yunxian                        | 2               | poor peasant               | 8                     | 1                      | 1                     | 0                       | 1                              |                           |                           |                                | 10                                     |                           |                                  |                        | 396                                  |                                      |                                         | 20                              |                                                       | 10                                       | 39.4                       | 394                                           | 376                                             | 0.58                      | 218                                          | 612.08              | 612.08                                       |                                    | 59                                | 376                                      | 0.8                                            | 300.80                   |                                |                                | 185.11             | 115.69                              | 351.66                          | 467.35                            |                               |
| 53               | 1976 | Zhang Yumei                       | 1               | poor peasant               | 12.5                  | 2                      | 1                     | 1                       | 2                              |                           |                           |                                | 20                                     |                           |                                  |                        | 531                                  |                                      |                                         | 31                              |                                                       | 20                                       | 39.4                       | 788                                           | 500                                             | 0.65                      | 325                                          | 1113                | 556.5                                        |                                    | 177                               | 500                                      | 0.82                                           | 410.00                   |                                |                                | 378.27             | 31.73                               | 218.40                          | 250.13                            |                               |
| 54               | 1976 | Wang Jishi                        | 1               | middle-class peasant       | 14.5                  | 3                      | 1                     | 2                       | 3                              |                           |                           |                                | 30                                     |                           |                                  |                        | 562                                  |                                      |                                         | 36                              |                                                       | 30                                       | 39.4                       | 1182                                          | 627                                             | 0.65                      | 408                                          | 1589.55             | 529.85                                       |                                    | 177                               | 627                                      | 0.82                                           | 514.14                   |                                |                                | 641.00             | -126.86                             | 1307.30                         | 1180.44                           |                               |
| 55               | 1976 | Mu Zhaosheng                      | 2               | middle-class peasant       | 14                    | 2                      | 1                     | 1                       | 6                              |                           |                           |                                | 56                                     |                           |                                  |                        | 460                                  |                                      |                                         | 35                              |                                                       | 56                                       | 39.4                       | 2206.4                                        | 425                                             | 0.58                      | 247                                          | 2452.9              | 408.8166667                                  |                                    | 295                               | 425                                      | 0.8                                            | 340.00                   |                                |                                | 479.77             | -139.77                             | -8.71                           | -148.48                           |                               |
| 56               | 1976 | Li Cuilan                         | 2               | middle-class peasant       | 4                     | 1                      | 0                     | 1                       | 3                              |                           |                           |                                | 30                                     |                           |                                  |                        | 280                                  |                                      |                                         | 10                              |                                                       | 30                                       | 39.4                       | 1182                                          | 270                                             | 0.58                      | 157                                          | 1338.6              | 446.2                                        |                                    | 177                               | 270                                      | 0.8                                            | 216.00                   |                                |                                | 226.87             | -10.87                              | 28.85                           | 17.98                             |                               |
| 57               | 1976 | Ma Shanming                       | 2               | middle-class peasant       | 18                    | 3                      | 1                     | 2                       | 7                              |                           |                           |                                | 68                                     |                           |                                  |                        | 803                                  |                                      |                                         | 45                              |                                                       | 68                                       | 39.4                       | 2679.2                                        | 758                                             | 0.58                      | 440                                          | 3118.84             | 445.5485714                                  |                                    | 413                               | 758                                      | 0.8                                            | 606.40                   |                                |                                | 649.69             | -43.29                              | -810.01                         | -853.30                           |                               |

(cont.)

| Household number | Year | Name of the head of the household | Production team | Class status (1)         | Basic work points (2) | Total labor forces (3) | Male labor forces (4) | Female labor forces (5) | Total household population (6) | Age: 1 to 3 years old (7) | Age: 4 to 7 years old (8) | Age: 8 years old and above (9) | Work points of grain distribution (10) | Laboring work points (11) | Farmyard manure work points (12) | Total work points (13) | Work points of compulsory labor (14) | Work points of help cultivation (15) | Work points of private plots labor (16) | Total deducted work points (17) | Actual workdays of participation in distribution (18) | Workpoints for rations distribution (19) | Rations per workpoint (20) | Total rations received from distribution (21) | Workdays of participation in distribution (22) | Grains per workpoint (23) | Total grains distributed by work-points (24) | Grains subsidy (25) | Total Grains received from distribution (26) | Distributed grains per person (27) | Distributed grains per adult (28) | Grains received from private plots (29) | Workdays of participation in distribution (30) | Value per workpoint (31) | Total value of workpoints (32) | Money used for investment (33) | Sum of income (34) | Money distributed in this year (34) | Deposit/debt of this year (35) | Deposit/debt over the years (36) | Accumulated deposit/debt (37) |
|------------------|------|-----------------------------------|-----------------|--------------------------|-----------------------|------------------------|-----------------------|-------------------------|--------------------------------|---------------------------|---------------------------|--------------------------------|----------------------------------------|---------------------------|----------------------------------|------------------------|--------------------------------------|--------------------------------------|-----------------------------------------|---------------------------------|-------------------------------------------------------|------------------------------------------|----------------------------|-----------------------------------------------|------------------------------------------------|---------------------------|----------------------------------------------|---------------------|----------------------------------------------|------------------------------------|-----------------------------------|-----------------------------------------|------------------------------------------------|--------------------------|--------------------------------|--------------------------------|--------------------|-------------------------------------|--------------------------------|----------------------------------|-------------------------------|
| 58               | 1976 | Liang Xiulan                      | 2               | middle-class peasant     |                       | 0                      |                       |                         |                                |                           |                           |                                |                                        |                           |                                  |                        |                                      |                                      |                                         |                                 | 0                                                     | 39.4                                     | 0                          | 0                                             | 0.58                                           | 0                         | 0                                            | #DIV/0!             |                                              | 0                                  | 0                                 | 0.8                                     | 0.00                                           |                          |                                |                                |                    | 0.00                                |                                | 0.00                             |                               |
| 59               | 1976 | Cui Yongchang                     | 1               | poor peasant             | 2.5                   | 1                      | 0                     | 1                       | 4                              |                           |                           |                                | 40                                     |                           |                                  |                        | 617                                  |                                      |                                         | 6                               |                                                       | 40                                       | 39.4                       | 1576                                          | 611                                            | 0.65                      | 397                                          |                     | 1973.15                                      | 493.2875                           |                                   | 295                                     | 611                                            | 0.82                     | 501.02                         |                                |                    | 480.61                              | 20.41                          | 262.36                           | 282.77                        |
| 60               | 1976 | Zhang Hengshou                    | 1               | low-middle-class peasant | 17                    | 3                      | 1                     | 2                       | 8                              |                           |                           |                                | 74                                     |                           |                                  |                        | 812                                  |                                      |                                         | 45                              |                                                       | 74                                       | 39.4                       | 2915.6                                        | 767                                            | 0.65                      | 499                                          |                     | 3414.15                                      | 426.76875                          |                                   | 413                                     | 767                                            | 0.82                     | 628.94                         |                                |                    | 734.64                              | -105.70                        | 201.45                           | 95.75                         |
| 61               | 1976 | Zhao Yingtong                     | 1               | poor peasant             | 12.5                  | 2                      | 1                     | 1                       | 3                              |                           |                           |                                | 30                                     |                           |                                  |                        | 588                                  |                                      |                                         | 31                              |                                                       | 30                                       | 39.4                       | 1182                                          | 557                                            | 0.65                      | 362                                          |                     | 1544.05                                      | 514.6833333                        |                                   | 177                                     | 557                                            | 0.82                     | 456.74                         |                                |                    | 541.45                              | -84.71                         | 556.20                           | 471.49                        |
| 62               | 1976 | Wu Xinggui                        | 1               | poor peasant             | 14                    | 2                      | 1                     | 1                       | 6                              |                           |                           |                                | 50                                     |                           |                                  |                        | 594                                  |                                      |                                         | 35                              |                                                       | 50                                       | 39.4                       | 1970                                          | 559                                            | 0.65                      | 363                                          |                     | 2333.35                                      | 388.8916667                        |                                   | 236                                     | 559                                            | 0.82                     | 458.38                         |                                |                    | 489.94                              | -31.56                         | 97.93                            | 66.37                         |
| 63               | 1976 | Wang Youfeng                      | 1               | poor peasant             | 4                     | 1                      | 0                     | 1                       | 3                              |                           |                           |                                | 30                                     |                           |                                  |                        | 471                                  |                                      |                                         | 10                              |                                                       | 30                                       | 39.4                       | 1182                                          | 461                                            | 0.65                      | 300                                          |                     | 1481.65                                      | 493.8833333                        |                                   | 177                                     | 461                                            | 0.82                     | 378.02                         |                                |                    | 303.12                              | 74.90                          | 48.58                            | 123.48                        |
| 64               | 1976 | Wang Qingsheng                    | 1               | poor peasant             | 10                    | 1                      | 1                     | 0                       | 1                              |                           |                           |                                | 10                                     |                           |                                  |                        | 420                                  |                                      |                                         |                                 |                                                       | 10                                       | 39.4                       | 394                                           | 420                                            | 0.65                      | 273                                          |                     | 667                                          | 667                                |                                   | 118                                     | 420                                            | 0.82                     | 344.40                         |                                |                    | 223.99                              | 120.41                         | 491.74                           | 612.15                        |
| 65               | 1976 | Li Yulin                          | 1               | middle-class peasant     |                       | 0                      |                       |                         | 2                              |                           |                           |                                | 20                                     |                           |                                  |                        | 171                                  |                                      |                                         |                                 |                                                       | 20                                       | 39.4                       | 788                                           | 171                                            | 0.65                      | 111                                          |                     | 899.15                                       | 449.575                            |                                   | 177                                     | 171                                            | 0.82                     | 140.22                         |                                |                    | 215.97                              | -75.75                         | 192.51                           | 116.76                        |
| 66               | 1976 | Zuo Chunlan                       | 1               | middle-class peasant     | 4                     | 1                      | 0                     | 1                       | 5                              |                           |                           |                                | 50                                     |                           |                                  |                        | 105                                  |                                      |                                         | 10                              |                                                       | 50                                       | 39.4                       | 1970                                          | 95                                             | 0.65                      | 62                                           |                     | 2031.75                                      | 508                                |                                   | 354                                     | 95                                             | 0.82                     | 77.90                          | 335                            |                    | 322.13                              | 90.77                          | -43.03                           | 47.74                         |
| 67               | 1976 | Gao Chongji                       | 1               | poor peasant             | 22.5                  | 0                      |                       |                         | 7                              |                           |                           |                                | 70                                     |                           |                                  |                        | 1211                                 |                                      |                                         | 56                              |                                                       | 70                                       | 39.4                       | 2758                                          | 1155                                           | 0.65                      | 751                                          |                     | 3508.75                                      | 501.25                             |                                   | 413                                     | 1155                                           | 0.82                     | 947.10                         |                                |                    | 914.03                              | 33.07                          | 1001.18                          | 1034.25                       |
| 68               | 1976 | Gao Chongwen                      | 1               | poor peasant             | 24.5                  | 4                      | 2                     | 2                       | 8                              |                           |                           |                                | 80                                     |                           |                                  |                        | 1211                                 |                                      |                                         | 61                              |                                                       | 80                                       | 39.4                       | 3152                                          | 1150                                           | 0.65                      | 748                                          |                     | 3899.5                                       | 487.4375                           |                                   | 472                                     | 1150                                           | 0.82                     | 943.00                         |                                |                    | 901.22                              | 41.78                          | 278.15                           | 319.93                        |
| 69               | 1976 | Gao Peiren                        | 1               | poor peasant             | 34                    | 0                      |                       |                         | 8                              |                           |                           |                                | 80                                     |                           |                                  |                        | 1353                                 |                                      |                                         | 85                              |                                                       | 80                                       | 39.4                       | 3152                                          | 1268                                           | 0.65                      | 824                                          |                     | 3976.2                                       | 497.025                            |                                   | 472                                     | 1268                                           | 0.82                     | 1039.76                        |                                |                    | 996.16                              | 43.60                          | 616.26                           | 659.86                        |
| 70               | 1976 | Wang Jingyi                       | 1               | low-middle-class peasant | 4                     | 0                      |                       |                         | 2                              |                           |                           |                                | 16                                     |                           |                                  |                        | 46                                   |                                      |                                         | 10                              |                                                       | 16                                       | 39.4                       | 630.4                                         | 36                                             | 0.65                      | 23                                           |                     | 653.8                                        | 326.9                              |                                   | 0                                       | 36                                             | 0.82                     | 29.52                          | 95                             |                    | 136.32                              | -11.80                         |                                  | -11.80                        |
| 71               | 1976 | Wang Shutang                      | 1               | low-middle-class peasant | 14                    | 2                      | 1                     | 1                       | 5                              |                           |                           |                                | 46                                     |                           |                                  |                        | 503                                  |                                      |                                         | 35                              |                                                       | 46                                       | 39.4                       | 1812.4                                        | 468                                            | 0.65                      | 304                                          |                     | 2116.6                                       | 423.32                             |                                   | 236                                     | 468                                            | 0.82                     | 383.76                         |                                |                    | 593.08                              | -209.32                        | 556.70                           | 347.38                        |
| 72               | 1976 | Meng Peizhong                     | 1               | middle-class peasant     |                       | 0                      |                       |                         | 1                              |                           |                           |                                | 10                                     |                           |                                  |                        | 349                                  |                                      |                                         |                                 |                                                       | 10                                       | 39.4                       | 394                                           | 349                                            | 0.65                      | 227                                          |                     | 620.85                                       | 620.85                             |                                   | 59                                      | 349                                            | 0.82                     | 286.18                         |                                |                    | 273.42                              | 12.76                          | 588.35                           | 601.11                        |
| 73               | 1976 | Meng Peixing                      | 1               | middle-class peasant     | 10.5                  | 2                      | 1                     | 1                       | 4                              |                           |                           |                                | 40                                     |                           |                                  |                        | 510                                  |                                      |                                         | 26                              |                                                       | 40                                       | 39.4                       | 1576                                          | 484                                            | 0.65                      | 315                                          |                     | 1890.6                                       | 472.65                             |                                   | 354                                     | 484                                            | 0.82                     | 396.88                         |                                |                    | 506.33                              | -109.45                        | 251.37                           | 141.92                        |
| 74               | 1976 | Meng Mingbiao                     | 1               | middle-class peasant     | 14                    | 2                      | 1                     | 1                       | 7                              |                           |                           |                                | 66                                     |                           |                                  |                        | 502                                  |                                      |                                         | 35                              |                                                       | 66                                       | 39.4                       | 2600.4                                        | 467                                            | 0.65                      | 304                                          |                     | 2903.95                                      | 414.85                             |                                   | 354                                     | 467                                            | 0.82                     | 382.94                         | 25                             |                    | 549.47                              | -141.53                        | -267.17                          | -408.70                       |
| 75               | 1976 | Xue Yuhua                         | 2               | poor peasant             | 16.5                  | 3                      | 1                     | 2                       | 3                              |                           |                           |                                | 30                                     |                           |                                  |                        | 637                                  |                                      |                                         | 41                              |                                                       | 30                                       | 39.4                       | 1182                                          | 596                                            | 0.58                      | 351                                          |                     | 1533                                         | 511                                |                                   | 177                                     | 596                                            | 0.8                      | 476.80                         | 27                             |                    | 370.29                              | 133.51                         | -299.68                          | -166.17                       |
| 76               | 1976 | Wang Chuana                       | 1               | middle-class peasant     | 4                     | 1                      | 0                     | 1                       | 6                              |                           |                           |                                | 54                                     |                           |                                  |                        | 45                                   |                                      |                                         | 10                              |                                                       | 54                                       | 39.4                       | 2127.6                                        | 35                                             | 0.65                      | 23                                           |                     | 2150.35                                      | 358.3916667                        |                                   | 295                                     | 35                                             | 0.82                     | 28.70                          | 370                            |                    | 349.82                              | 48.88                          | -355.28                          | -306.40                       |
| 77               | 1976 | Wang Zhenguo                      | 2               | low-middle-class peasant | 10.5                  | 2                      | 1                     | 1                       | 4                              |                           |                           |                                | 40                                     |                           |                                  |                        | 678                                  |                                      |                                         | 26                              |                                                       | 40                                       | 39.4                       | 1576                                          | 652                                            | 0.58                      | 378                                          |                     | 1954.16                                      | 488.54                             |                                   | 236                                     | 652                                            | 0.8                      | 521.60                         |                                |                    | 512.67                              | 8.93                           | 299.33                           | 308.26                        |
| 78               | 1976 | Mu Shouquan                       | 1               | poor peasant             | 2.5                   | 1                      | 0                     | 1                       | 2                              |                           |                           |                                | 20                                     |                           |                                  |                        | 402                                  |                                      |                                         | 6                               |                                                       | 20                                       | 39.4                       | 788                                           | 396                                            | 0.65                      | 257                                          |                     | 1045.4                                       | 522.7                              |                                   | 118                                     | 396                                            | 0.82                     | 324.72                         |                                |                    | 303.94                              | 20.78                          | 636.73                           | 657.51                        |



(cont.)

| Household number | Year | Name of the head of the household | Production team | Class status (1)         | Basic work points (2) | Total labor forces (3) | Male labor forces (4) | Female labor forces (5) | Total household population (6) | Age: 1 to 3 years old (7) | Age: 4 to 7 years old (8) | Age: 8 years old and above (9) | Work points of grain distribution (10) | Laboring work points (11) | Farmyard manure work points (12) | Total work points (13) | Work points of compulsory labor (14) | Work points of help cultivation (15) | Work points of private plots labor (16) | Total deducted work points (17) | Actual workdays of participation in distribution (18) | Workpoints for rations distribution (19) | Rations per workpoint (20) | Total rations received from distribution (21) | Workdays of participation in distribution (22) | Grains per workpoint (23) | Total grains distributed by work-points (24) | Grains subsidy (25) | Total Grains received from distribution (26) | Distributed grains per person (27) | Distributed grains per adult (28) | Grains received from private plots (29) | Workdays of participation in distribution (30) | Value per workpoint (31) | Total value of workpoints (32) | Money used for investment (33) | Sum of income (34) | Money distributed in this year (34) | Deposit/debt of this year (35) | Deposit/debt over the years (36) | Accumulated deposit/debt (37) |
|------------------|------|-----------------------------------|-----------------|--------------------------|-----------------------|------------------------|-----------------------|-------------------------|--------------------------------|---------------------------|---------------------------|--------------------------------|----------------------------------------|---------------------------|----------------------------------|------------------------|--------------------------------------|--------------------------------------|-----------------------------------------|---------------------------------|-------------------------------------------------------|------------------------------------------|----------------------------|-----------------------------------------------|------------------------------------------------|---------------------------|----------------------------------------------|---------------------|----------------------------------------------|------------------------------------|-----------------------------------|-----------------------------------------|------------------------------------------------|--------------------------|--------------------------------|--------------------------------|--------------------|-------------------------------------|--------------------------------|----------------------------------|-------------------------------|
| 79               | 1976 | Mu Zhaozheng                      | 1               | poor peasant             | 14                    | 2                      | 1                     | 1                       | 6                              |                           |                           |                                | 54                                     |                           |                                  | 628                    |                                      |                                      |                                         | 35                              | 54                                                    | 39.4                                     | 2127.6                     | 593                                           | 0.65                                           | 385                       | 2513.05                                      | 418.8416667         | 295                                          | 593                                | 0.82                              | 486.26                                  |                                                |                          | 664.23                         | -177.97                        | 733.38             | 555.41                              |                                |                                  |                               |
| 80               | 1976 | Ma Likui                          | 1               | poor peasant             | 18                    | 3                      | 1                     | 2                       | 7                              |                           |                           |                                | 64                                     |                           |                                  | 1254                   |                                      |                                      |                                         | 45                              | 64                                                    | 39.4                                     | 2521.6                     | 1209                                          | 0.65                                           | 786                       | 3307.45                                      | 472.4928571         | 236                                          | 1209                               | 0.82                              | 991.38                                  |                                                |                          | 840.39                         | 150.99                         | 1215.32            | 1366.31                             |                                |                                  |                               |
| 81               | 1976 | Ma Xiulan                         | 1               | middle-class peasant     | 4                     | 1                      | 0                     | 1                       | 6                              |                           |                           |                                | 58                                     |                           |                                  | 270                    |                                      |                                      |                                         | 10                              | 58                                                    | 39.4                                     | 2285.2                     | 260                                           | 0.65                                           | 169                       | 2454.2                                       | 409.0333333         | 354                                          | 260                                | 0.82                              | 213.20                                  | 115                                            |                          | 401.85                         | -73.65                         | 16.19              | -57.46                              |                                |                                  |                               |
| 82               | 1976 | Wang Dianjie                      | 1               | middle-class peasant     | 26                    | 4                      | 2                     | 2                       | 8                              |                           |                           |                                | 78                                     |                           |                                  | 1089                   |                                      |                                      |                                         | 65                              | 78                                                    | 39.4                                     | 3073.2                     | 1024                                          | 0.65                                           | 666                       | 3738.8                                       | 467.35              | 472                                          | 1024                               | 0.82                              | 839.68                                  |                                                |                          | 961.67                         | -121.99                        | 602.12             | 480.13                              |                                |                                  |                               |
| 83               | 1976 | Wang Litang                       | 2               | low-middle-class peasant | 14                    | 2                      | 1                     | 1                       | 8                              |                           |                           |                                | 78                                     |                           |                                  | 977                    |                                      |                                      |                                         | 35                              | 78                                                    | 39.4                                     | 3073.2                     | 942                                           | 0.58                                           | 546                       | 3619.56                                      | 452.445             | 531                                          | 942                                | 0.8                               | 753.60                                  |                                                |                          | 871.74                         | -118.14                        | 431.70             | 313.56                              |                                |                                  |                               |
| 84               | 1976 | Wei Zhaoliang                     | 1               | low-middle-class peasant | 12                    | 2                      | 1                     | 1                       | 3                              |                           |                           |                                | 30                                     |                           |                                  | 447                    |                                      |                                      |                                         | 30                              | 30                                                    | 39.4                                     | 1182                       | 417                                           | 0.65                                           | 271                       | 1453.05                                      | 484.35              | 236                                          | 417                                | 0.82                              | 341.94                                  |                                                |                          | 462.47                         | -120.53                        | 468.67             | 348.14                              |                                |                                  |                               |
| 85               | 1976 | Yang Zhongwen                     | 1               | middle-class peasant     |                       | 0                      |                       |                         | 1                              |                           |                           |                                | 10                                     |                           |                                  |                        |                                      |                                      |                                         | 10                              | 39.4                                                  | 394                                      | 0                          | 0.65                                          | 0                                              | 394                       | 394                                          | 118                 | 0                                            | 0.82                               | 0.00                              |                                         |                                                | 120.39                   | -120.39                        | -1056.94                       | -1177.33           |                                     |                                |                                  |                               |
| 86               | 1976 | Zhu Guangchang                    | 1               | middle-class peasant     | 24                    | 3                      | 2                     | 1                       | 4                              |                           |                           |                                | 40                                     |                           |                                  | 854                    |                                      |                                      |                                         | 60                              | 40                                                    | 39.4                                     | 1576                       | 794                                           | 0.65                                           | 516                       | 2092.1                                       | 523.025             | 236                                          | 794                                | 0.82                              | 651.08                                  |                                                |                          | 675.84                         | -24.76                         | 842.34             | 817.58                              |                                |                                  |                               |
| 87               | 1976 | Yang Yugui                        | 1               | middle-class peasant     | 18                    | 0                      |                       |                         | 3                              |                           |                           |                                | 30                                     |                           |                                  | 484                    |                                      |                                      |                                         | 45                              | 30                                                    | 39.4                                     | 1182                       | 439                                           | 0.65                                           | 285                       | 1467.35                                      | 489.1166667         | 177                                          | 439                                | 0.82                              | 359.98                                  |                                                |                          | 377.18                         | -17.20                         | 242.93             | 225.73                              |                                |                                  |                               |
| 88               | 1976 | Yang Yingzhou                     | 2               | middle-class peasant     | 22                    | 3                      | 2                     | 1                       | 3                              |                           |                           |                                | 30                                     |                           |                                  | 905                    |                                      |                                      |                                         | 55                              | 30                                                    | 39.4                                     | 1182                       | 850                                           | 0.58                                           | 493                       | 1675                                         | 558.3333333         | 177                                          | 850                                | 0.8                               | 680.00                                  |                                                |                          | 550.35                         | 129.65                         | 68.61              | 198.26                              |                                |                                  |                               |
| 89               | 1976 | Li Kailiang                       | 1               | poor peasant             | 24                    | 2                      | 1                     | 1                       | 4                              |                           |                           |                                | 40                                     |                           |                                  | 657                    |                                      |                                      |                                         | 60                              | 40                                                    | 39.4                                     | 1576                       | 597                                           | 0.65                                           | 388                       | 1964.05                                      | 491.0125            | 177                                          | 597                                | 0.82                              | 489.54                                  | 0                                              |                          | 691.72                         | -202.18                        | 354.77             | 152.59                              |                                |                                  |                               |
| 90               | 1976 | Li Kaigong                        | 1               | poor peasant             | 2.5                   | 1                      | 0                     | 1                       | 2                              |                           |                           |                                | 20                                     |                           |                                  | 329                    |                                      |                                      |                                         | 6                               | 20                                                    | 39.4                                     | 788                        | 323                                           | 0.65                                           | 216                       | 1004                                         | 502                 | 177                                          | 333                                | 0.82                              | 273.06                                  |                                                |                          | 347.43                         | -74.37                         | 616.69             | 542.32                              |                                |                                  |                               |
| 91               | 1976 | Meng Jingcan                      | 1               | poor peasant             |                       |                        |                       |                         |                                |                           |                           |                                |                                        |                           |                                  |                        |                                      |                                      |                                         |                                 |                                                       |                                          |                            |                                               |                                                |                           |                                              |                     |                                              |                                    |                                   |                                         |                                                |                          |                                |                                |                    |                                     |                                |                                  |                               |
| 92               | 1976 | Fu Lidong                         | 1               | middle-class peasant     |                       | 0                      |                       |                         | 1                              |                           |                           |                                | 10                                     |                           |                                  | 179                    |                                      |                                      |                                         |                                 | 10                                                    | 39.4                                     | 394                        | 179                                           | 0.65                                           | 116                       | 510.35                                       | 510.35              | 59                                           | 179                                | 0.82                              | 146.78                                  |                                                |                          | 168.91                         | -22.13                         | 231.20             | 209.07                              |                                |                                  |                               |
| 93               | 1976 | Meng Peicheng                     | 2               | middle-class peasant     | 14                    | 2                      | 1                     | 1                       | 9                              |                           |                           |                                | 84                                     |                           |                                  | 576                    |                                      |                                      |                                         | 35                              | 84                                                    | 39.4                                     | 3309.6                     | 541                                           | 0.58                                           | 314                       | 3623.38                                      | 402.5977778         | 472                                          | 541                                | 0.8                               | 432.80                                  | 52.98                                          |                          | 888.93                         | -403.15                        | 1442.6             | 1039.45                             |                                |                                  |                               |
| 94               | 1976 | Mu Shouwen                        | 1               | middle-class peasant     | 14                    | 2                      | 1                     | 1                       | 7                              |                           |                           |                                | 64                                     |                           |                                  | 750                    |                                      |                                      |                                         | 35                              | 64                                                    | 39.4                                     | 2521.6                     | 715                                           | 0.65                                           | 465                       | 2986.35                                      | 426.6214286         | 413                                          | 715                                | 0.82                              | 586.30                                  |                                                |                          | 622.65                         | -36.35                         | 53.55              | 17.20                               |                                |                                  |                               |
| 95               | 1976 | Mu Zhaorui                        | 1               | middle-class peasant     | 14                    | 2                      | 1                     | 1                       | 3                              |                           |                           |                                | 28                                     |                           |                                  | 481                    |                                      |                                      |                                         | 35                              | 28                                                    | 39.4                                     | 1103.2                     | 446                                           | 0.65                                           | 290                       | 1393.1                                       | 464.3666667         | 118                                          | 446                                | 0.82                              | 365.72                                  |                                                |                          | 514.64                         | -148.92                        | 732.25             | 583.33                              |                                |                                  |                               |
| 96               | 1976 | Zhang Lirong                      | 2               | middle-class peasant     | 14                    | 2                      | 1                     | 1                       | 6                              |                           |                           |                                | 54                                     |                           |                                  | 732                    |                                      |                                      |                                         | 35                              | 54                                                    | 39.4                                     | 2127.6                     | 697                                           | 0.58                                           | 404                       | 2531.86                                      | 421.9766667         | 295                                          | 697                                | 0.8                               | 557.60                                  |                                                |                          | 622.16                         | -64.56                         | 829.38             | 764.82                              |                                |                                  |                               |
| 97               | 1976 | Cui Yongfu                        | 1               | poor peasant             |                       | 0                      |                       |                         |                                |                           |                           |                                |                                        |                           |                                  |                        |                                      |                                      |                                         |                                 | 0                                                     | 39.4                                     | 0                          | 0                                             | 0.65                                           | 0                         | 0                                            | #DIV/0!             | 0                                            | 0                                  | 0.82                              | 0.00                                    |                                                |                          |                                | 0.00                           |                    | 0.00                                |                                |                                  |                               |



(cont.)

| Household number | Year | Name of the head of the household | Production team | Class status (1)         | Basic work points (2) | Total labor forces (3) | Male labor forces (4) | Female labor forces (5) | Total household population (6) | Age: 1 to 3 years old (7) | Age: 4 to 7 years old (8) | Age: 8 years old and above (9) | Work points of grain distribution (10) | Laboring work points (11) | Farmyard manure work points (12) | Total work points (13) | Work points of compulsory labor (14) | Work points of help cultivation (15) | Work points of private plots labor (16) | Total deducted work points (17) | Acutal workdays of participation in distribution (18) | Workpoints for rations distribution (19) | Rations per workpoint (20) | Total rations received from distribution (21) | Workdays of participation in distribution (22) | Grains per workpoint (23) | Total grains distributed by work-points (24) | Grains subsidy (25) | Total Grains received from distribution (26) | Distributed grains per person (27) | Distributed grains per adult (28) | Grains received from privated plots (29) | Workdays of participation in distribution (30) | Value per workpoint (31) | Total value of workpoints (32) | Money used for investment (33) | Sum of income (34) | Money distributed in this year (34) | Deposit/ debt of this year (35) | Deposit/ debt over the years (36) | Accumulated deposit/debt (37) |
|------------------|------|-----------------------------------|-----------------|--------------------------|-----------------------|------------------------|-----------------------|-------------------------|--------------------------------|---------------------------|---------------------------|--------------------------------|----------------------------------------|---------------------------|----------------------------------|------------------------|--------------------------------------|--------------------------------------|-----------------------------------------|---------------------------------|-------------------------------------------------------|------------------------------------------|----------------------------|-----------------------------------------------|------------------------------------------------|---------------------------|----------------------------------------------|---------------------|----------------------------------------------|------------------------------------|-----------------------------------|------------------------------------------|------------------------------------------------|--------------------------|--------------------------------|--------------------------------|--------------------|-------------------------------------|---------------------------------|-----------------------------------|-------------------------------|
| 98               | 1976 | Meng Lanying                      | 1               | poor peasant             |                       | 0                      |                       |                         |                                |                           |                           |                                |                                        |                           |                                  |                        |                                      |                                      |                                         |                                 | 0                                                     | 39.4                                     | 0                          | 0                                             | 0.65                                           | 0                         | 0                                            | #DIV/o!             | 0                                            | 0                                  | 0.82                              | 0.00                                     |                                                |                          |                                |                                | 0.00               | 0.00                                |                                 |                                   |                               |
| 99               | 1976 | Cui Yiren                         | 1               | poor peasant             | 14                    | 2                      | 1                     | 1                       | 6                              |                           |                           |                                | 54                                     |                           |                                  |                        | 472                                  |                                      |                                         | 35                              |                                                       | 54                                       | 39.4                       | 2127.6                                        | 437                                            | 0.65                      | 284                                          | 2411.65             | 401.9416667                                  | 295                                | 437                               | 0.82                                     | 358.34                                         |                          |                                | 583.01                         | -224.67            | 32.44                               | -192.23                         |                                   |                               |
| 100              | 1976 | Wang Qingde                       | 1               | low-middle-class peasant |                       | 0                      |                       |                         | 1                              |                           |                           |                                | 10                                     |                           |                                  |                        | 220                                  |                                      |                                         |                                 | 10                                                    | 39.4                                     | 394                        | 220                                           | 0.65                                           | 143                       | 537                                          | 537                 |                                              | 59                                 | 220                               | 0.82                                     | 180.40                                         |                          |                                | 223.41                         | -43.01             | 615.83                              | 572.82                          |                                   |                               |
| 101              | 1976 | Jin Lianyu                        | 1               | poor peasant             |                       | 0                      |                       |                         | 1                              |                           |                           |                                | 10                                     |                           |                                  |                        |                                      |                                      |                                         |                                 | 10                                                    | 39.4                                     | 394                        | 0                                             | 0.65                                           | 0                         | 394                                          | 394                 |                                              | 59                                 | 0                                 | 0.82                                     | 0.00                                           |                          |                                | 100.85                         | -100.85            | -214.74                             | -315.59                         |                                   |                               |
| 102              | 1976 | Wang Qiyi                         | 1               | poor peasant             | 8                     | 1                      | 1                     | 0                       | 1                              |                           |                           |                                | 10                                     |                           |                                  |                        | 281                                  |                                      |                                         | 20                              |                                                       | 10                                       | 39.4                       | 394                                           | 237                                            | 0.65                      | 154                                          | 548.05              | 548.05                                       | 59                                 | 237                               | 0.82                                     | 194.34                                         |                          |                                | 253.46                         | -59.12             | 496.33                              | 437.21                          |                                   |                               |
| 103              | 1976 | Yang Chengye                      | 1               | poor peasant             |                       | 0                      |                       |                         | 1                              |                           |                           |                                | 10                                     |                           |                                  |                        | 84                                   |                                      |                                         |                                 | 10                                                    | 39.4                                     | 394                        | 84                                            | 0.65                                           | 55                        | 448.6                                        | 448.6               | 59                                           | 84                                 | 0.82                              | 68.88                                    |                                                |                          | 100.01                         | -31.13                         | 135.64             | 104.51                              |                                 |                                   |                               |
| 104              | 1976 | Meng Mingjian                     | 1               | poor peasant             | 10                    | 1                      | 1                     | 0                       | 3                              |                           |                           |                                | 28                                     |                           |                                  |                        | 720                                  |                                      |                                         | 25                              |                                                       | 28                                       | 39.4                       | 1279.2                                        | 695                                            | 0.65                      | 452                                          | 576.9833333         | 295                                          | 695                                | 0.82                              | 569.90                                   |                                                |                          | 713.76                         | -143.86                        | 187.32             | 43.46                               |                                 |                                   |                               |
| 105              | 1976 | Guo Yuxiang                       | 1               | poor peasant             |                       | 0                      |                       |                         |                                |                           |                           |                                |                                        |                           |                                  |                        |                                      |                                      |                                         |                                 | 0                                                     | 39.4                                     | 0                          | 0                                             | 0.65                                           | 0                         | 0                                            | #DIV/o!             | 0                                            | 0                                  | 0.82                              | 0.00                                     |                                                |                          |                                | 0.00                           | 0.00               |                                     |                                 |                                   |                               |
| 106              | 1976 | Wu Congchao                       | 2               | poor peasant             | 18                    | 3                      | 1                     | 2                       | 7                              |                           |                           |                                | 68                                     |                           |                                  |                        | 800                                  |                                      |                                         | 45                              |                                                       | 68                                       | 39.4                       | 2679.2                                        | 755                                            | 0.58                      | 438                                          | 3117.1              | 445.3                                        | 413                                | 755                               | 0.8                                      | 604.00                                         |                          |                                | 716.83                         | -112.83            | -268.78                             | -381.61                         |                                   |                               |
| 107              | 1976 | Xie Yuzhen                        | 2               | poor peasant             |                       | 0                      |                       |                         |                                |                           |                           |                                |                                        |                           |                                  |                        |                                      |                                      |                                         |                                 | 0                                                     | 39.4                                     | 0                          | 0                                             | 0.58                                           | 0                         | 0                                            | #DIV/o!             | 0                                            | 0                                  | 0.8                               | 0.00                                     |                                                |                          |                                | 0.00                           | 0.00               |                                     |                                 |                                   |                               |
| 108              | 1976 | Wu Songlin                        | 2               | poor peasant             |                       | 0                      |                       |                         |                                |                           |                           |                                |                                        |                           |                                  |                        |                                      |                                      |                                         |                                 | 0                                                     | 39.4                                     | 0                          | 0                                             | 0.58                                           | 0                         | 0                                            | #DIV/o!             | 0                                            | 0                                  | 0.8                               | 0.00                                     |                                                |                          |                                | 0.00                           | 0.00               |                                     |                                 |                                   |                               |
| 109              | 1976 | Yang Chunmei                      | 2               | poor peasant             |                       | 0                      |                       |                         |                                |                           |                           |                                |                                        |                           |                                  |                        |                                      |                                      |                                         |                                 | 0                                                     | 39.4                                     | 0                          | 0                                             | 0.58                                           | 0                         | 0                                            | #DIV/o!             | 0                                            | 0                                  | 0.8                               | 0.00                                     |                                                |                          |                                | 0.00                           | 0.00               |                                     |                                 |                                   |                               |
| 110              | 1976 | Wu Yulan                          | 2               | poor peasant             | 4                     | 1                      | 0                     | 1                       | 4                              |                           |                           |                                | 57                                     |                           |                                  |                        | 358                                  |                                      |                                         | 10                              |                                                       | 57                                       | 39.4                       | 2127.6                                        | 348                                            | 0.58                      | 202                                          | 2329.44             | 582.36                                       | 295                                | 348                               | 0.8                                      | 278.40                                         | 60                       |                                | 421.16                         | -82.76             | 46.52                               | -36.24                          |                                   |                               |
| 111              | 1976 | Hua Suzhen                        | 1               | poor peasant             |                       | 0                      |                       |                         | 1                              |                           |                           |                                | 10                                     |                           |                                  |                        | 56                                   |                                      |                                         |                                 | 10                                                    | 39.4                                     | 394                        | 56                                            | 0.65                                           | 36                        | 430.4                                        | 430.4               | 118                                          | 56                                 | 0.82                              | 45.92                                    |                                                |                          | 110.09                         | -64.17                         | 58.80              | -5.37                               |                                 |                                   |                               |
| 112              | 1976 | Song Liangxiang                   | 2               | poor peasant             | 4                     | 1                      | 0                     | 1                       | 2                              |                           |                           |                                | 16                                     |                           |                                  |                        | 9                                    |                                      |                                         | 10                              |                                                       | 16                                       | 39.4                       | 630.4                                         | 16                                             | 0.58                      | 0                                            | 630.4               | 315.2                                        | 59                                 | 0                                 | 0.8                                      | 0.00                                           | 10                       |                                | 106.26                         | -96.26             | 142.30                              | 46.04                           |                                   |                               |
| 113              | 1976 | Zhang Dongde                      | 1               | poor peasant             | 4                     | 1                      | 0                     | 1                       | 3                              |                           |                           |                                | 30                                     |                           |                                  |                        | 492                                  |                                      |                                         | 10                              |                                                       | 30                                       | 39.4                       | 1182                                          | 482                                            | 0.65                      | 313                                          | 1495.3              | 498.4333333                                  | 177                                | 482                               | 0.82                                     | 395.24                                         |                          |                                | 370.04                         | 25.20              | 476.10                              | 501.30                          |                                   |                               |
| 114              | 1976 | Zhang Zhenyuan                    | 2               | poor peasant             | 14                    | 2                      | 1                     | 1                       | 6                              |                           |                           |                                | 52                                     |                           |                                  |                        | 563                                  |                                      |                                         | 35                              |                                                       | 52                                       | 39.4                       | 2029.8                                        | 528                                            | 0.58                      | 306                                          | 2336.04             | 389.34                                       | 236                                | 528                               | 0.8                                      | 422.40                                         |                          |                                | 525.49                         | -103.09            | 192.20                              | 89.11                           |                                   |                               |
| 115              | 1976 | Meng Qingyun                      | 2               | poor peasant             |                       | 0                      |                       |                         |                                |                           |                           |                                |                                        |                           |                                  |                        |                                      |                                      |                                         |                                 | 0                                                     | 39.4                                     | 0                          | 0                                             | 0.58                                           | 0                         | 0                                            | #DIV/o!             | 0                                            | 0                                  | 0.8                               | 0.00                                     |                                                |                          |                                | 0.00                           | 0.00               |                                     |                                 |                                   |                               |
| 116              | 1976 | Zhao Hongsheng                    | 2               | low-middle-class peasant |                       | 0                      |                       |                         |                                |                           |                           |                                |                                        |                           |                                  |                        |                                      |                                      |                                         |                                 | 0                                                     | 39.4                                     | 0                          | 0                                             | 0.58                                           | 0                         | 0                                            | #DIV/o!             | 0                                            | 0                                  | 0.8                               | 0.00                                     |                                                |                          |                                | 0.00                           | 0.00               |                                     |                                 |                                   |                               |
| 117              | 1976 | Mneg Mingyou                      | 2               | poor peasant             | 10                    | 1                      | 1                     | 0                       | 1                              |                           |                           |                                | 10                                     |                           |                                  |                        | 204                                  |                                      |                                         | 25                              |                                                       | 10                                       | 39.4                       | 394                                           | 179                                            | 0.58                      | 104                                          | 497.82              | 497.82                                       | 59                                 | 179                               | 0.8                                      | 143.20                                         |                          |                                | 323.50                         | -180.30            | 569.46                              | 389.16                          |                                   |                               |
| 118              | 1976 | Xu Peishi                         | 1               | poor peasant             | 23                    | 4                      | 2                     | 2                       | 5                              |                           |                           |                                | 50                                     |                           |                                  |                        | 236                                  |                                      |                                         | 58                              |                                                       | 50                                       | 39.4                       | 1970                                          | 678                                            | 0.65                      | 441                                          | 2410.7              | 482.14                                       | 354                                | 678                               | 0.82                                     | 555.96                                         |                          |                                | 586.06                         | -30.10             | 643.73                              | 613.63                          |                                   |                               |
| 119              | 1976 | Wang Qingchang                    | 2               | poor peasant             | 18                    | 3                      | 1                     | 2                       | 4                              |                           |                           |                                | 40                                     |                           |                                  |                        | 1004                                 |                                      |                                         | 45                              |                                                       | 40                                       | 39.4                       | 1576                                          | 959                                            | 0.58                      | 556                                          | 2132.22             | 533.055                                      | 236                                | 959                               | 0.8                                      | 767.20                                         |                          |                                | 705.98                         | 61.22              | 533.18                              | 594.40                          |                                   |                               |
| 120              | 1976 | Wang Qinghai                      | 2               | poor peasant             | 14                    | 2                      | 1                     | 1                       | 10                             |                           |                           |                                | 98                                     |                           |                                  |                        | 806                                  |                                      |                                         | 35                              |                                                       | 98                                       | 39.4                       | 3861.2                                        | 771                                            | 0.58                      | 447                                          | 4308.38             | 430.838                                      | 590                                | 771                               | 0.8                                      | 616.80                                         |                          |                                | 858.67                         | -241.87            | -193.61                             | -435.48                         |                                   |                               |
| 121              | 1976 | Cao Desheng                       | 2               | poor peasant             |                       | 0                      |                       |                         |                                |                           |                           |                                |                                        |                           |                                  |                        |                                      |                                      |                                         |                                 | 0                                                     | 39.4                                     | 0                          | 0                                             | 0.58                                           | 0                         | 0                                            | #DIV/o!             | 0                                            | 0                                  | 0.8                               | 0.00                                     |                                                |                          |                                | 0.00                           | 0.00               |                                     |                                 |                                   |                               |
| 122              | 1976 | Ma Yuying                         | 2               | poor peasant             |                       | 0                      |                       |                         | 2                              |                           |                           |                                | 20                                     |                           |                                  |                        | 9                                    |                                      |                                         |                                 | 20                                                    | 39.4                                     | 788                        | 9                                             | 0.58                                           | 5                         | 793.22                                       | 396.61              | 177                                          | 9                                  | 0.8                               | 7.20                                     | 130.75                                         |                          | 134.11                         | 3.84                           | -331.47            | -327.63                             |                                 |                                   |                               |
| 123              | 1976 | Liu Peizhen                       | 2               | poor peasant             |                       | 0                      |                       |                         |                                |                           |                           |                                |                                        |                           |                                  |                        |                                      |                                      |                                         |                                 | 0                                                     | 39.4                                     | 0                          | 0                                             | 0.58                                           | 0                         | 0                                            | #DIV/o!             | 0                                            | 0                                  | 0.8                               | 0.00                                     |                                                |                          |                                | 0.00                           | 0.00               |                                     |                                 |                                   |                               |
| 124              | 1976 | Liu Dahai                         | 2               | middle-class peasant     | 16.5                  | 3                      | 1                     | 2                       | 6                              |                           |                           |                                | 52                                     |                           |                                  |                        | 537                                  |                                      |                                         | 41                              |                                                       | 52                                       | 39.4                       | 2048.8                                        | 496                                            | 0.58                      | 288                                          | 2336.48             | 389.4133333                                  | 236                                | 496                               | 0.8                                      | 396.80                                         |                          |                                | 755.96                         | -359.16            | 573.84                              | 214.68                          |                                   |                               |
| 125              | 1976 | Liu Ercan                         | 2               | middle-class peasant     |                       | 0                      |                       |                         | 2                              |                           |                           |                                | 20                                     |                           |                                  |                        | 9                                    |                                      |                                         |                                 | 20                                                    | 39.4                                     | 788                        | 9                                             | 0.58                                           | 5                         | 793.22                                       | 396.61              | 118                                          | 9                                  | 0.8                               | 7.20                                     | 60                                             |                          | 183.40                         | -116.20                        | -1249.52           | -1365.72                            |                                 |                                   |                               |

(cont.)

| Household number | Year | Name of the head of the household | Production team | Class status (1)         | Basic work points (2) | Total labor forces (3) | Male labor forces (4) | Female labor forces (5) | Total household population (6) | Age: 1 to 3 years old (7) | Age: 4 to 7 years old (8) | Age: 8 years old and above (9) | Work points of grain distribution (10) | Laboring work points (11) | Farmyard work points (12) | Total work points (13) | Work points of compulsory labor (14) | Work points of help cultivation (15) | Work points of private plots labor (16) | Total deducted work points (17) | Acutal workdays of participation in distribution (18) | Workpoints for rations distribution (19) | Rations per workpoint (20) | Total rations received form distribution (21) | Workdays of participation in distribu-tion (22) | Grains per workpoint (23) | Total grains distributed by work-points (24) | Grains subsidy (25) | Total Grains received from distribution (26) | Distributed grains per person (27) | Distributed grains per adult (28) | Grains received from privated plots (29) | Workdays of participation in distribution (30) | Value per workpoint (31) | Total value of workpoints (32) | Money used for investment (33) | Sum of income (34) | Money distributed in this year (34) | Deposit/ debt of this year (35) | Deposit/ debt over the years (36) | Accumulated deposit/debt (37) |
|------------------|------|-----------------------------------|-----------------|--------------------------|-----------------------|------------------------|-----------------------|-------------------------|--------------------------------|---------------------------|---------------------------|--------------------------------|----------------------------------------|---------------------------|---------------------------|------------------------|--------------------------------------|--------------------------------------|-----------------------------------------|---------------------------------|-------------------------------------------------------|------------------------------------------|----------------------------|-----------------------------------------------|-------------------------------------------------|---------------------------|----------------------------------------------|---------------------|----------------------------------------------|------------------------------------|-----------------------------------|------------------------------------------|------------------------------------------------|--------------------------|--------------------------------|--------------------------------|--------------------|-------------------------------------|---------------------------------|-----------------------------------|-------------------------------|
| 126              | 1976 | Wu Jingxiang                      | 2               | low-middle-class peasant | 4                     | 1                      | 0                     | 1                       | 2                              |                           |                           |                                | 20                                     |                           |                           | 113                    |                                      |                                      |                                         | 10                              | 20                                                    | 39.4                                     | 788                        | 103                                           | 0.58                                            | 60                        | 847.74                                       | 423.87              |                                              | 177                                | 103                               | 0.8                                      | 82.40                                          | 160                      |                                | 156.37                         | 86.03              | -371.17                             | -285.14                         |                                   |                               |
| 127              | 1976 | Zhang Hengde                      | 2               | poor peasant             | 20.5                  | 4                      | 1                     | 3                       | 7                              |                           |                           |                                | 70                                     |                           |                           | 1031                   |                                      |                                      |                                         | 51                              | 70                                                    | 39.4                                     | 2758                       | 980                                           | 0.58                                            | 568                       | 3326.4                                       | 475.2               |                                              | 413                                | 980                               | 0.8                                      | 784.00                                         |                          | 981.40                         | -197.40                        | 1441.39            | 1243.99                             |                                 |                                   |                               |
| 128              | 1976 | Zhang Hengde                      | 2               | poor peasant             | 8                     | 1                      | 1                     | 0                       | 1                              |                           |                           |                                | 10                                     |                           |                           | 305                    |                                      |                                      |                                         | 20                              | 10                                                    | 39.4                                     | 394                        | 285                                           | 0.58                                            | 165                       | 559.3                                        | 559.3               |                                              | 59                                 | 285                               | 0.8                                      | 228.00                                         |                          | 237.99                         | -9.99                          | 470.98             | 460.99                              |                                 |                                   |                               |
| 129              | 1976 | Wei Zhaoxiang                     | 2               | low-middle-class peasant | 14                    | 2                      | 1                     | 1                       | 4                              |                           |                           |                                | 36                                     |                           |                           | 618                    |                                      |                                      |                                         | 35                              | 36                                                    | 39.4                                     | 1418.4                     | 583                                           | 0.58                                            | 338                       | 1756.54                                      | 439.135             |                                              | 177                                | 583                               | 0.8                                      | 466.40                                         |                          | 497.85                         | -31.45                         | 187.86             | 156.41                              |                                 |                                   |                               |
| 130              | 1976 | Mu Zhaoren                        | 2               | poor peasant             | 24                    | 3                      | 2                     | 1                       | 7                              |                           |                           |                                | 68                                     |                           |                           | 956                    |                                      |                                      |                                         | 60                              | 68                                                    | 39.4                                     | 2679.2                     | 896                                           | 0.58                                            | 515                       | 3194.2                                       | 456.3142857         |                                              | 413                                | 896                               | 0.8                                      | 716.80                                         |                          | 865.11                         | -148.31                        | 3.28               | -145.03                             |                                 |                                   |                               |
| 131              | 1976 | Li Shiyiing                       | 2               | poor peasant             |                       | 0                      |                       |                         | 2                              |                           |                           |                                | 20                                     |                           |                           | 261                    |                                      |                                      |                                         |                                 | 20                                                    | 39.4                                     | 788                        | 261                                           | 0.58                                            | 151                       | 939.38                                       | 465                 |                                              | 118                                | 261                               | 0.8                                      | 208.80                                         |                          | 219.91                         | -11.11                         | 296.69             | 285.58                              |                                 |                                   |                               |
| 132              | 1976 | Wu Jinggui                        | 1               | low-middle-class peasant |                       | 0                      |                       |                         |                                |                           |                           |                                |                                        |                           |                           |                        |                                      |                                      |                                         |                                 | 0                                                     | 39.4                                     | 0                          | 0                                             | 0.65                                            | 0                         | 0                                            | #DIV/o!             |                                              | 0                                  | 0                                 | 0.82                                     | 0.00                                           |                          |                                | 0.00                           |                    | 0.00                                |                                 |                                   |                               |
| 133              | 1976 | Wu Jingfang                       | 2               | middle-class peasant     | 14                    | 2                      | 1                     | 1                       | 7                              |                           |                           |                                | 68                                     |                           |                           | 343                    |                                      |                                      |                                         | 35                              | 68                                                    | 39.4                                     | 2679.2                     | 308                                           | 0.58                                            | 179                       | 2857.84                                      | 408.2628571         |                                              | 472                                | 308                               | 0.8                                      | 246.40                                         | 46                       |                                | 643.90                         | -351.50            | -1561.74                            | -1913.24                        |                                   |                               |
| 134              | 1976 | Wu Jingyu                         | 2               | low-middle-class peasant | 20.5                  | 3                      | 2                     | 1                       | 6                              |                           |                           |                                | 60                                     |                           |                           | 1106                   |                                      |                                      |                                         | 51                              | 60                                                    | 39.4                                     | 2364                       | 1055                                          | 0.58                                            | 612                       | 2975.9                                       | 495.9833333         |                                              | 354                                | 1055                              | 0.8                                      | 844.00                                         |                          | 887.26                         | -43.26                         | 797.53             | 754.27                              |                                 |                                   |                               |
| 135              | 1976 | Wu Jinghua                        | 2               | low-middle-class peasant | 24                    | 3                      | 2                     | 1                       | 5                              |                           |                           |                                | 50                                     |                           |                           | 799                    |                                      |                                      |                                         | 60                              | 50                                                    | 39.4                                     | 1970                       | 739                                           | 0.58                                            | 429                       | 2398.62                                      | 479.724             |                                              | 295                                | 739                               | 0.8                                      | 591.20                                         |                          | 780.59                         | -189.39                        | 783.59             | 594.20                              |                                 |                                   |                               |
| 136              | 1976 | Wu Changbiao                      | 2               | middle-class peasant     |                       | 0                      |                       |                         |                                |                           |                           |                                |                                        |                           |                           |                        |                                      |                                      |                                         |                                 | 0                                                     | 39.4                                     | 0                          | 0                                             | 0.58                                            | 0                         | 0                                            | #DIV/o!             |                                              | 0                                  | 0                                 | 0.8                                      | 0.00                                           |                          | 238.92                         | -238.92                        | 242.64             | 3.72                                |                                 |                                   |                               |
| 137              | 1976 | Wu Jingnan                        | 2               | middle-class peasant     | 14                    | 3                      | 2                     | 1                       | 8                              |                           |                           |                                | 74                                     |                           |                           | 841                    |                                      |                                      |                                         | 10                              | 74                                                    | 39.4                                     | 2915.6                     | 831                                           | 0.58                                            | 482                       | 3397.58                                      | 424.6975            |                                              | 472                                | 831                               | 0.8                                      | 664.80                                         | 215                      |                                | 857.51                         | 22.29              | -452.22                             | -429.93                         |                                   |                               |
| 138              | 1976 | Wu Jing'an                        | 2               | middle-class peasant     | 10                    | 1                      | 1                     | 0                       | 2                              |                           |                           |                                | 20                                     |                           |                           | 414                    |                                      |                                      |                                         | 25                              | 20                                                    | 39.4                                     | 788                        | 389                                           | 0.58                                            | 226                       | 1013.62                                      | 506.81              |                                              | 177                                | 389                               | 0.8                                      | 311.20                                         |                          | 329.96                         | -18.76                         | 133.73             | 114.97                              |                                 |                                   |                               |
| 139              | 1976 | Wu Jinghui                        | 2               | middle-class peasant     | 14                    | 2                      | 1                     | 1                       | 6                              |                           |                           |                                | 58                                     |                           |                           | 591                    |                                      |                                      |                                         | 35                              | 58                                                    | 39.4                                     | 2285.2                     | 556                                           | 0.58                                            | 322                       | 2607.68                                      | 434.6133333         |                                              | 295                                | 556                               | 0.8                                      | 444.80                                         |                          | 640.88                         | -196.08                        | 278.34             | 82.26                               |                                 |                                   |                               |
| 140              | 1976 | Wu Jingying                       | 2               | middle-class peasant     | 18                    | 3                      | 1                     | 2                       | 9                              |                           |                           |                                | 86                                     |                           |                           | 948                    |                                      |                                      |                                         | 45                              | 86                                                    | 39.4                                     | 3388.4                     | 903                                           | 0.58                                            | 524                       | 3912.14                                      | 379                 |                                              | 472                                | 903                               | 0.8                                      | 722.40                                         | 48                       |                                | 805.10                         | -34.70             | -78.28                              | -112.98                         |                                   |                               |
| 141              | 1976 | Wu Jingfu                         | 2               | middle-class peasant     | 14                    | 2                      | 1                     | 1                       | 6                              |                           |                           |                                | 56                                     |                           |                           | 545                    |                                      |                                      |                                         | 35                              | 56                                                    | 39.4                                     | 2206.4                     | 510                                           | 0.58                                            | 296                       | 2502.2                                       | 417.0333333         |                                              | 295                                | 510                               | 0.8                                      | 408.00                                         | 137.7                    |                                | 556.08                         | -10.38             | -246.94                             | -257.32                         |                                   |                               |
| 142              | 1976 | Meng Dongmei                      | 2               | low-middle-class peasant | 4                     | 1                      | 0                     | 1                       | 5                              |                           |                           |                                | 48                                     |                           |                           | 94                     |                                      |                                      |                                         | 10                              | 48                                                    | 39.4                                     | 1891.2                     | 84                                            | 0.58                                            | 49                        | 1939.92                                      | 387.984             |                                              | 236                                | 84                                | 0.8                                      | 67.20                                          | 230                      |                                | 307.81                         | -10.61             | -73.57                              | -84.18                          |                                   |                               |
| 143              | 1976 | Mneg Tianyu                       | 2               | poor peasant             |                       | 0                      |                       |                         |                                |                           |                           |                                |                                        |                           |                           |                        |                                      |                                      |                                         |                                 | 0                                                     | 39.4                                     | 0                          | 0                                             | 0.58                                            | 0                         | 0                                            | #DIV/o!             |                                              | 0                                  | 0                                 | 0.8                                      | 0.00                                           |                          |                                | 0.00                           |                    | 0.00                                |                                 |                                   |                               |

(cont.)

| Household number | Year | Name of the head of the household | Production team | Class status (1)           | Basic work points (2) | Total labor forces (3) | Male labor forces (4) | Female labor forces (5) | Total household population (6) | Age: 1 to 3 years old (7) | Age: 4 to 7 years old (8) | Age: 8 years old and above (9) | Work points of grain distribution (10) | Laboring work points (11) | Farmyard manure work points (12) | Total work points (13) | Work points of compulsory labor (14) | Work points of help cultivation (15) | Work points of private plots labor (16) | Total deducted work points (17) | Actual workdays of participation in distribution (18) | Workpoints for rations distribution (19) | Rations per workpoint (20) | Total rations received from distribution (21) | Workdays of participation in distribution (22) | Grains per workpoint (23) | Total grains distributed by work-points (24) | Grains subsidy (25) | Total Grains received from distribution (26) | Distributed grains per person (27) | Distributed grains per adult (28) | Grains received from private plots (29) | Workdays of participation in distribution (30) | Value per workpoint (31) | Total value of workpoints (32) | Money used for investment (33) | Sum of income (34) | Money distributed in this year (34) | Deposit/debt of this year (35) | Deposit/debt over the years (36) | Accumulated deposit/debt (37) |
|------------------|------|-----------------------------------|-----------------|----------------------------|-----------------------|------------------------|-----------------------|-------------------------|--------------------------------|---------------------------|---------------------------|--------------------------------|----------------------------------------|---------------------------|----------------------------------|------------------------|--------------------------------------|--------------------------------------|-----------------------------------------|---------------------------------|-------------------------------------------------------|------------------------------------------|----------------------------|-----------------------------------------------|------------------------------------------------|---------------------------|----------------------------------------------|---------------------|----------------------------------------------|------------------------------------|-----------------------------------|-----------------------------------------|------------------------------------------------|--------------------------|--------------------------------|--------------------------------|--------------------|-------------------------------------|--------------------------------|----------------------------------|-------------------------------|
| 144              | 1976 | Xue Lanying                       | 2               | middle-class peasant       |                       | 0                      |                       |                         |                                |                           |                           |                                |                                        |                           |                                  |                        |                                      |                                      |                                         |                                 | 0                                                     | 39.4                                     | 0                          | 0                                             | 0.58                                           | 0                         |                                              | 0                   | #DIV/0!                                      |                                    | 0                                 | 0                                       | 0.8                                            | 0.00                     |                                |                                | 0.00               |                                     | 0.00                           |                                  |                               |
| 145              | 1976 | Wang Shufu                        | 2               | poor peasant               | 14                    | 2                      | 1                     | 1                       | 4                              |                           |                           |                                | 34                                     |                           |                                  |                        | 614                                  |                                      |                                         | 35                              |                                                       | 34                                       | 39.4                       | 1249.6                                        | 579                                            | 0.58                      | 336                                          |                     | 1585.42                                      | 396.355                            |                                   | 177                                     | 579                                            | 0.8                      | 463.20                         |                                | 445.62             | 17.58                               | 457.29                         | 474.87                           |                               |
| 146              | 1976 | Li Changsheng                     | 2               | poor peasant               | 14                    | 0                      |                       |                         | 6                              |                           |                           |                                | 60                                     |                           |                                  |                        | 778                                  |                                      |                                         | 10                              |                                                       | 60                                       | 39.4                       | 2364                                          | 768                                            | 0.58                      | 445                                          |                     | 2809.44                                      | 468.24                             |                                   | 413                                     | 768                                            | 0.8                      | 614.40                         |                                | 682.62             | -68.22                              | 401.93                         | 333.71                           |                               |
| 147              | 1976 | Zhang Yongqing                    | 2               | poor peasant               |                       | 0                      |                       |                         | 1                              |                           |                           |                                | 10                                     |                           |                                  |                        | 220                                  |                                      |                                         | 10                              |                                                       | 10                                       | 39.4                       | 394                                           | 220                                            | 0.58                      | 128                                          |                     | 521.6                                        | 521.6                              |                                   | 59                                      | 220                                            | 0.8                      | 176.00                         |                                | 206.37             | -30.37                              | 539.79                         | 509.42                           |                               |
| 148              | 1976 | Wang Suzhen                       | 2               | poor peasant               |                       | 0                      |                       |                         | 1                              |                           |                           |                                | 10                                     |                           |                                  |                        | 8                                    |                                      |                                         | 10                              |                                                       | 10                                       | 39.4                       | 394                                           | 8                                              | 0.58                      | 5                                            |                     | 398.64                                       | 398.64                             |                                   | 59                                      | 8                                              | 0.8                      | 6.40                           |                                | 67.27              | -60.87                              | -721.59                        | -782.46                          |                               |
| 149              | 1976 | Liu Chunxiang                     | 2               | upper-middle-class peasant | 28.5                  | 0                      |                       |                         | 6                              |                           |                           |                                | 56                                     |                           |                                  |                        | 1223                                 |                                      |                                         | 71                              |                                                       | 56                                       | 39.4                       | 2206.4                                        | 1152                                           | 0.58                      | 668                                          |                     | 2874.56                                      | 479.0933333                        |                                   | 236                                     | 1152                                           | 0.8                      | 921.60                         |                                | 973.24             | -51.64                              | 1700.07                        | 1648.43                          |                               |
| 150              | 1976 | Liu Chunyou                       | 2               | low-middle-class peasant   | 14                    | 2                      | 1                     | 1                       | 5                              |                           |                           |                                | 42                                     |                           |                                  |                        | 668                                  |                                      |                                         | 35                              |                                                       | 42                                       | 39.4                       | 1687.8                                        | 633                                            | 0.58                      | 367                                          |                     | 2054.94                                      | 410.988                            |                                   | 295                                     | 633                                            | 0.8                      | 506.40                         |                                | 800.66             | -294.26                             | 786.85                         | 492.59                           |                               |
| 151              | 1976 | Wang Kaitai                       | 2               | middle-class peasant       | 14                    | 2                      | 1                     | 1                       | 7                              |                           |                           |                                | 64                                     |                           |                                  |                        | 384                                  |                                      |                                         | 35                              |                                                       | 64                                       | 39.4                       | 2521.6                                        | 349                                            | 0.58                      | 202                                          |                     | 2724.02                                      | 389.1457143                        |                                   | 295                                     | 349                                            | 0.8                      | 279.20                         | 60                             | 565.55             | -226.35                             | -299.45                        | -525.80                          |                               |
| 152              | 1976 | Meng Minghuan                     | 2               | middle-class peasant       |                       | 0                      |                       |                         | 2                              |                           |                           |                                | 20                                     |                           |                                  |                        |                                      |                                      |                                         |                                 | 20                                                    | 39.4                                     | 788                        | 0                                             | 0.58                                           | 0                         |                                              | 788                 | 394                                          |                                    | 118                               | 0                                       | 0.8                                            | 0.00                     |                                | 115.12                         | -115.12            | -111.72                             | -226.84                        |                                  |                               |
| 153              | 1976 | Meng Qingfu                       | 2               | middle-class peasant       | 10                    | 1                      | 1                     | 0                       | 1                              |                           |                           |                                | 10                                     |                           |                                  |                        | 493                                  |                                      |                                         | 25                              |                                                       | 10                                       | 39.4                       | 394                                           | 468                                            | 0.58                      | 271                                          |                     | 665.44                                       | 665.44                             |                                   | 59                                      | 468                                            | 0.8                      | 374.40                         |                                | 335.00             | 39.40                               | 875.86                         | 915.26                           |                               |
| 154              | 1976 | Mneg Qingsheng                    | 2               | middle-class peasant       | 10                    | 1                      | 1                     | 0                       | 1                              |                           |                           |                                | 10                                     |                           |                                  |                        | 422                                  |                                      |                                         | 25                              |                                                       | 10                                       | 39.4                       | 394                                           | 397                                            | 0.58                      | 230                                          |                     | 624.26                                       | 624.26                             |                                   | 59                                      | 397                                            | 0.8                      | 317.60                         |                                | 412.30             | -94.70                              | 651.04                         | 556.34                           |                               |
| 155              | 1976 | Meng Qingbao                      | 2               | middle-class peasant       | 10                    | 1                      | 1                     | 0                       | 2                              |                           |                           |                                | 20                                     |                           |                                  |                        | 336                                  |                                      |                                         | 25                              |                                                       | 20                                       | 39.4                       | 788                                           | 311                                            | 0.58                      | 180                                          |                     | 968.38                                       | 484.19                             |                                   | 118                                     | 311                                            | 0.8                      | 248.80                         |                                | 225.71             | 23.09                               | -49.38                         | -26.29                           |                               |
| 156              | 1976 | Cao Jincheng                      | 2               | poor peasant               | 10                    | 1                      | 1                     | 0                       | 1                              |                           |                           |                                | 10                                     |                           |                                  |                        | 432                                  |                                      |                                         | 25                              |                                                       | 10                                       | 39.4                       | 394                                           | 407                                            | 0.58                      | 236                                          |                     | 630.06                                       | 630.06                             |                                   | 59                                      | 407                                            | 0.8                      | 325.60                         |                                | 339.95             | -14.35                              | 187.77                         | 173.42                           |                               |
| 157              | 1976 | Cao Jinwei                        | 2               | poor peasant               | 10                    | 1                      | 1                     | 0                       | 2                              |                           |                           |                                | 20                                     |                           |                                  |                        | 413                                  |                                      |                                         | 25                              |                                                       | 20                                       | 39.4                       | 788                                           | 388                                            | 0.58                      | 228                                          |                     | 1016                                         | 508                                |                                   | 118                                     | 388                                            | 0.8                      | 310.40                         |                                | 336.75             | -26.35                              | 487.04                         | 460.69                           |                               |
| 158              | 1976 | Meng Tianlai                      | 1               | middle-class peasant       | 14                    | 2                      | 1                     | 1                       | 5                              |                           |                           |                                | 44                                     |                           |                                  |                        | 547                                  |                                      |                                         | 35                              |                                                       | 44                                       | 39.4                       | 1733.6                                        | 512                                            | 0.65                      | 333                                          |                     | 2066.4                                       | 413.28                             |                                   | 236                                     | 512                                            | 0.82                     | 419.84                         |                                | 569.69             | -149.85                             | 467.46                         | 317.61                           |                               |
| 159              | 1976 | Yu Guiying                        | 1               | poor peasant               |                       | 0                      |                       |                         |                                |                           |                           |                                |                                        |                           |                                  |                        |                                      |                                      |                                         |                                 | 0                                                     | 39.4                                     | 0                          | 0                                             | 0.65                                           | 0                         |                                              | 0                   | #DIV/0!                                      |                                    | 0                                 | 0                                       | 0.82                                           | 0.00                     |                                |                                | 0.00               |                                     | 0.00                           |                                  |                               |
| 160              | 1976 | Liu Chunxiao                      | 2               | upper-middle-class peasant | 14                    | 2                      | 1                     | 1                       | 5                              |                           |                           |                                | 44                                     |                           |                                  |                        | 566                                  |                                      |                                         | 35                              |                                                       | 44                                       | 39.4                       | 1733.6                                        | 531                                            | 0.58                      | 308                                          |                     | 2041.58                                      | 408.316                            |                                   | 177                                     | 531                                            | 0.8                      | 424.80                         |                                | 599.85             | -175.05                             | 582.01                         | 406.96                           |                               |
| 161              | 1976 | Meng Qinghua                      | 2               | low-middle-class peasant   | 8                     | 1                      | 1                     | 0                       | 1                              |                           |                           |                                | 10                                     |                           |                                  |                        | 239                                  |                                      |                                         | 20                              |                                                       | 10                                       | 39.4                       | 394                                           | 219                                            | 0.58                      | 127                                          |                     | 521.02                                       | 521.02                             |                                   | 59                                      | 219                                            | 0.8                      | 175.20                         |                                | 146.33             | 28.87                               | 171.46                         | 200.33                           |                               |
| 162              | 1976 | Meng Peigui                       | 2               | rich peasant               |                       |                        |                       |                         |                                |                           |                           |                                |                                        |                           |                                  |                        |                                      |                                      |                                         |                                 | 0                                                     | 39.4                                     | 0                          | 0                                             | 0.58                                           | 0                         |                                              | 0                   | #DIV/0!                                      |                                    | 0                                 | 0                                       | 0.8                                            | 0.00                     |                                |                                | 0.00               |                                     | 0.00                           |                                  |                               |
| 163              | 1976 | Meng Peiji                        | 2               | rich peasant               | 26.5                  | 4                      | 2                     | 2                       | 7                              |                           |                           |                                | 70                                     |                           |                                  |                        | 1267                                 |                                      |                                         | 91                              |                                                       | 70                                       | 39.4                       | 2758                                          | 1176                                           | 0.58                      | 682                                          |                     | 3440.08                                      | 491.44                             |                                   | 413                                     | 1176                                           | 0.8                      | 940.80                         |                                | 968.49             | -27.69                              | 703.94                         | 676.25                           |                               |

(cont.)

| Household number | Year | Name of the head of the household | Production team | Class status (1)           | Basic work points (2) | Total labor forces (3) | Male labor forces (4) | Female labor forces (5) | Total household population (6) | Age: 1 to 3 years old (7) | Age: 4 to 7 years old (8) | Age: 8 years old and above (9) | Work points of grain distribution (10) | Laboring work points (11) | Farmyard manure work points (12) | Total work points (13) | Work points of compulsory labor (14) | Work points of help cultivation (15) | Work points of private plots labor (16) | Total deducted work points (17) | Actual workdays of participation in distribution (18) | Workpoints for rations distribution (19) | Rations per workpoint (20) | Total rations received from distribution (21) | Workdays of participation in distribution (22) | Grains per workpoint (23) | Total grains distributed by work-points (24) | Grains subsidy (25) | Total Grains received from distribution (26) | Distributed grains per person (27) | Distributed grains per adult (28) | Grains received from private plots (29) | Workdays of participation in distribution (30) | Value per workpoint (31) | Total value of workpoints (32) | Money used for investment (33) | Sum of income (34) | Money distributed in this year (34) | Deposit/debt of this year (35) | Deposit/debt over the years (36) | Accumulated deposit/debt (37) |
|------------------|------|-----------------------------------|-----------------|----------------------------|-----------------------|------------------------|-----------------------|-------------------------|--------------------------------|---------------------------|---------------------------|--------------------------------|----------------------------------------|---------------------------|----------------------------------|------------------------|--------------------------------------|--------------------------------------|-----------------------------------------|---------------------------------|-------------------------------------------------------|------------------------------------------|----------------------------|-----------------------------------------------|------------------------------------------------|---------------------------|----------------------------------------------|---------------------|----------------------------------------------|------------------------------------|-----------------------------------|-----------------------------------------|------------------------------------------------|--------------------------|--------------------------------|--------------------------------|--------------------|-------------------------------------|--------------------------------|----------------------------------|-------------------------------|
| 164              | 1976 | Meng Jinghuan                     | 2               | upper-middle-class peasant | 4                     | 1                      | 0                     | 1                       | 4                              |                           |                           |                                | 38                                     |                           |                                  |                        | 289                                  |                                      |                                         | 10                              |                                                       | 38                                       | 39.4                       | 1497.2                                        | 279                                            | 0.58                      | 162                                          |                     | 1659.02                                      | 335                                |                                   | 236                                     | 279                                            | 0.8                      | 223.20                         |                                | 282.64             | -59.44                              | 176.31                         | 116.87                           |                               |
| 165              | 1976 | Lan Jinzhi                        | 1               | poor peasant               |                       | 0                      |                       |                         |                                |                           |                           |                                |                                        |                           |                                  |                        |                                      |                                      |                                         |                                 | 0                                                     |                                          | 39.4                       | 0                                             | 0                                              | 0.65                      | 0                                            |                     | 0                                            | #DIV/0!                            |                                   | 0                                       | 0                                              | 0.82                     | 0.00                           |                                |                    | 0.00                                |                                | 0.00                             |                               |
| 166              | 1976 | Wang Jinshu                       | 2               | upper-middle-class peasant |                       | 0                      |                       |                         |                                |                           |                           |                                |                                        |                           |                                  |                        |                                      |                                      |                                         |                                 | 0                                                     |                                          | 39.4                       | 0                                             | 0                                              | 0.58                      | 0                                            |                     | 0                                            | #DIV/0!                            |                                   | 0                                       | 0                                              | 0.8                      | 0.00                           |                                |                    | 0.00                                |                                | 0.00                             |                               |
| 167              | 1976 | Cao Xiangyun                      | 2               | upper-middle-class peasant |                       | 0                      |                       |                         |                                |                           |                           |                                |                                        |                           |                                  |                        |                                      |                                      |                                         |                                 | 0                                                     |                                          | 39.4                       | 0                                             | 0                                              | 0.58                      | 0                                            |                     | 0                                            | #DIV/0!                            |                                   | 0                                       | 0                                              | 0.8                      | 0.00                           |                                |                    | 0.00                                |                                | 0.00                             |                               |
| 168              | 1976 | Li Shibao                         | 2               | poor peasant               | 17                    | 3                      | 1                     | 2                       | 10                             | 1                         | 1                         | 8                              | 94                                     |                           |                                  |                        | 1013                                 |                                      |                                         | 45                              |                                                       | 94                                       | 39.4                       | 3703.6                                        | 1028                                           | 0.58                      | 596                                          |                     | 4299.84                                      | 429.984                            |                                   | 531                                     | 1028                                           | 0.8                      | 822.40                         |                                | 850.84             | -28.44                              | -387.73                        | -416.17                          |                               |
| 169              | 1976 | Wang Kailu                        | 2               | poor peasant               | 32                    | 3                      | 2                     | 1                       | 5                              |                           |                           |                                | 50                                     |                           |                                  |                        | 1304                                 |                                      |                                         | 80                              |                                                       | 50                                       | 39.4                       | 1970                                          | 1224                                           | 0.58                      | 710                                          |                     | 2679.92                                      | 535.984                            |                                   | 295                                     | 1224                                           | 0.8                      | 979.20                         |                                | 929.92             | 49.28                               | 558.69                         | 607.97                           |                               |
| 170              | 1976 | Zhao Hongrui                      | 1               | middle-class peasant       | 34.5                  | 5                      | 3                     | 2                       | 8                              |                           | 2                         | 6                              | 78                                     |                           |                                  |                        | 1418                                 |                                      |                                         | 86                              |                                                       | 78                                       | 39.4                       | 3073.2                                        | 1382                                           | 0.65                      | 898                                          |                     | 3971.5                                       | 496.4375                           |                                   | 531                                     | 1382                                           | 0.82                     | 1133.24                        |                                | 1238.63            | -105.39                             | 1432.84                        | 1327.45                          |                               |
| 171              | 1976 | Fang Chunxing                     | 0               | middle-class peasant       |                       | 0                      |                       |                         |                                |                           |                           |                                |                                        |                           |                                  |                        |                                      |                                      |                                         |                                 | 0                                                     |                                          | 39.4                       | 0                                             | 0                                              | 0.94                      | 0                                            |                     | 0                                            | #DIV/0!                            |                                   | 0                                       | 0                                              |                          | 0.00                           |                                |                    | 0.00                                |                                | 0.00                             |                               |
| 172              | 1976 | Zhao Honglin                      | 2               | middle-class peasant       | 14                    | 0                      |                       |                         | 5                              |                           |                           |                                | 50                                     |                           |                                  |                        | 454                                  |                                      |                                         | 35                              |                                                       | 50                                       | 39.4                       | 1970                                          | 419                                            | 0.58                      | 243                                          |                     | 2213.02                                      | 442.604                            |                                   | 295                                     | 419                                            | 0.8                      | 335.20                         |                                | 446.29             | -111.09                             | 20.41                          | -90.68                           |                               |
| 173              | 1976 | Yu Jinquan                        | 0               | poor peasant               |                       | 0                      |                       |                         |                                |                           |                           |                                |                                        |                           |                                  |                        |                                      |                                      |                                         |                                 | 0                                                     |                                          | 39.4                       | 0                                             | 0                                              | 0.94                      | 0                                            |                     | 0                                            | #DIV/0!                            |                                   | 0                                       | 0                                              |                          | 0.00                           |                                |                    | 0.00                                |                                | 0.00                             |                               |
| 174              | 1976 | Yu Jinliang                       | 0               | poor peasant               |                       | 0                      |                       |                         |                                |                           |                           |                                |                                        |                           |                                  |                        |                                      |                                      |                                         |                                 | 0                                                     |                                          | 39.4                       | 0                                             | 0                                              | 0.94                      | 0                                            |                     | 0                                            | #DIV/0!                            |                                   | 0                                       | 0                                              |                          | 0.00                           |                                |                    | 0.00                                |                                | 0.00                             |                               |
| 175              | 1976 | Mu Zhaoxin                        | 2               | poor peasant               | 4                     | 1                      | 0                     | 1                       | 4                              |                           |                           |                                | 34                                     |                           |                                  |                        | 157                                  |                                      |                                         | 10                              |                                                       | 34                                       | 39.4                       | 1339.6                                        | 147                                            | 0.58                      | 85                                           |                     | 1424.86                                      | 356.215                            |                                   | 177                                     | 147                                            | 0.8                      | 117.60                         | 100                            | 221.14             | -3.54                               | -67.75                         | -71.29                           |                               |
| 176              | 1976 | Wang Guijing                      | 0               | poor peasant               |                       | 0                      |                       |                         |                                |                           |                           |                                |                                        |                           |                                  |                        |                                      |                                      |                                         |                                 | 0                                                     |                                          | 39.4                       | 0                                             | 0                                              | 0.94                      | 0                                            |                     | 0                                            | #DIV/0!                            |                                   | 0                                       | 0                                              |                          | 0.00                           |                                |                    | 0.00                                |                                | 0.00                             |                               |
| 177              | 1976 | Zhang Xuezhong                    | 1               | low-middle-class peasant   | 22                    | 4                      | 1                     | 3                       | 9                              |                           |                           |                                | 88                                     |                           |                                  |                        | 1277                                 |                                      |                                         | 55                              |                                                       | 88                                       | 39.4                       | 3467.2                                        | 1222                                           | 0.65                      | 794                                          |                     | 4261.5                                       | 473.5                              |                                   | 531                                     | 1222                                           | 0.82                     | 1002.04                        | 36.55                          | 890.93             | 147.66                              | -1035.86                       | -888.20                          |                               |
| 178              | 1976 | Jia Anji                          | 2               | poor peasant               | 18                    | 3                      | 1                     | 2                       | 6                              |                           |                           |                                | 58                                     |                           |                                  |                        | 862                                  |                                      |                                         | 45                              |                                                       | 58                                       | 39.4                       | 2285.2                                        | 817                                            | 0.58                      | 474                                          |                     | 2759.06                                      | 452                                |                                   | 295                                     | 817                                            | 0.8                      | 653.60                         |                                | 710.16             | -56.56                              | 381.37                         | 324.81                           |                               |
| 179              | 1976 | Liu Peishou                       | 1               | middle-class peasant       | 14                    | 2                      | 1                     | 1                       | 5                              |                           |                           |                                | 48                                     |                           |                                  |                        | 1034                                 |                                      |                                         | 35                              |                                                       | 48                                       | 39.4                       | 1891.2                                        | 999                                            | 0.65                      | 649                                          |                     | 2540.55                                      | 508.11                             |                                   | 236                                     | 999                                            | 0.82                     | 819.18                         |                                | 793.90             | 25.28                               | 1531.35                        | 1556.63                          |                               |
| 180              | 1976 | Gao Yunxian                       | 2               | middle-class peasant       | 38                    | 5                      | 3                     | 2                       | 8                              |                           |                           |                                | 80                                     |                           |                                  |                        | 1107                                 |                                      |                                         | 95                              |                                                       | 80                                       | 39.4                       | 3053                                          | 1012                                           | 0.58                      | 587                                          |                     | 3639.96                                      | 454.995                            |                                   | 472                                     | 1012                                           | 0.8                      | 809.60                         |                                | 1047.29            | -237.69                             | 903.58                         | 665.89                           |                               |
| 181              | 1976 | Tian Kehua                        | 2               | middle-class peasant       |                       | 0                      |                       |                         |                                |                           |                           |                                |                                        |                           |                                  |                        |                                      |                                      |                                         |                                 | 0                                                     |                                          | 39.4                       | 0                                             | 0                                              | 0.58                      | 0                                            |                     | 0                                            | #DIV/0!                            |                                   | 0                                       | 0                                              | 0.8                      | 0.00                           |                                |                    | 0.00                                |                                | 0.00                             |                               |
| 182              | 1976 | Tian Dawei                        | 1               | middle-class peasant       | 14                    | 2                      | 1                     | 1                       | 6                              |                           |                           |                                | 56                                     |                           |                                  |                        | 416                                  |                                      |                                         | 35                              |                                                       | 56                                       | 39.4                       | 2206.4                                        | 381                                            | 0.65                      | 248                                          |                     | 2454.05                                      | 409.0083333                        |                                   | 354                                     | 381                                            | 0.82                     | 312.42                         |                                | 573.43             | -261.01                             | -66.09                         | -327.10                          |                               |
| 183              | 1976 | Fan Liyuan                        | 2               | middle-class peasant       |                       | 0                      |                       |                         |                                |                           |                           |                                |                                        |                           |                                  |                        |                                      |                                      |                                         |                                 | 0                                                     |                                          | 39.4                       | 0                                             | 0                                              | 0.58                      | 0                                            |                     | 0                                            | #DIV/0!                            |                                   | 0                                       | 0                                              | 0.8                      | 0.00                           |                                |                    | 0.00                                |                                | 0.00                             |                               |

(cont.)

| Household number | Year | Name of the head of the household | Production team | Class status (1)           | Basic work points (2) | Total labor forces (3) | Male labor forces (4) | Female labor forces (5) | Total household population (6) | Age: 1 to 3 years old (7) | Age: 4 to 7 years old (8) | Age: 8 years old and above (9) | Work points of grain distribution (10) | Laboring work points (11) | Farmyard manure work points (12) | Total work points (13) | Work points of compulsory labor (14) | Work points of help cultivation (15) | Work points of private plots labor (16) | Total deducted work points (17) | Acutal workdays of participation in distribution (18) | Workpoints for rations distribution (19) | Rations per workpoint (20) | Total rations received form distribution (21) | Workdays of participation in distribu-tion (22) | Grains per workpoint (23) | Total grains distributed by work-points (24) | Grains subsidy (25) | Total Grains received from distribution (26) | Distributed grains per person (27) | Distributed grains per adult (28) | Grains received from privated plots (29) | Workdays of participation in distribution (30) | Value per workpoint (31) | Total value of workpoints (32) | Money used for investment (33) | Sum of income | Money distributed in this year (34) | Deposit/ debt of this year (35) | Deposit/ debt over the years (36) | Accumulated deposit/debt (37) |
|------------------|------|-----------------------------------|-----------------|----------------------------|-----------------------|------------------------|-----------------------|-------------------------|--------------------------------|---------------------------|---------------------------|--------------------------------|----------------------------------------|---------------------------|----------------------------------|------------------------|--------------------------------------|--------------------------------------|-----------------------------------------|---------------------------------|-------------------------------------------------------|------------------------------------------|----------------------------|-----------------------------------------------|-------------------------------------------------|---------------------------|----------------------------------------------|---------------------|----------------------------------------------|------------------------------------|-----------------------------------|------------------------------------------|------------------------------------------------|--------------------------|--------------------------------|--------------------------------|---------------|-------------------------------------|---------------------------------|-----------------------------------|-------------------------------|
| 184              | 1976 | Fan Shutang                       | 1               | middle-class peasant       | 14                    | 2                      | 1                     | 1                       | 7                              |                           |                           |                                | 68                                     |                           |                                  |                        | 512                                  |                                      |                                         |                                 | 35                                                    |                                          | 68                         | 39.4                                          | 2679.2                                          | 477                       | 0.65                                         | 310                 | 2989.25                                      | 427.0357143                        |                                   | 354                                      | 477                                            | 0.82                     | 391.14                         |                                |               | 597.92                              | -206.78                         | -191.27                           | -398.05                       |
| 185              | 1976 | Fan Chunxiang                     | 1               | middle-class peasant       | 4                     | 1                      | 0                     | 1                       | 5                              |                           |                           |                                | 44                                     |                           |                                  |                        | 159                                  |                                      |                                         |                                 | 10                                                    |                                          | 44                         | 39.4                                          | 1733.6                                          | 149                       | 0.65                                         | 97                  | 1830.45                                      | 366.09                             |                                   | 177                                      | 149                                            | 0.82                     | 122.18                         | 146                            |               | 285.10                              | -16.92                          | -29.46                            | -46.38                        |
| 186              | 1976 | Lian Huaizhe                      | 2               | poor peasant               | 8                     | 1                      | 1                     | 0                       | 4                              |                           |                           |                                | 40                                     |                           |                                  |                        | 517                                  |                                      |                                         |                                 | 20                                                    |                                          | 40                         | 39.4                                          | 1576                                            | 497                       | 0.58                                         | 288                 | 1864.26                                      | 466.065                            |                                   | 177                                      | 497                                            | 0.8                      | 397.60                         |                                |               | 487.24                              | -89.64                          | 122.38                            | 32.74                         |
| 187              | 1976 | Lian Wenbing                      | 2               | poor peasant               | 14                    | 0                      |                       |                         | 5                              |                           |                           |                                | 44                                     |                           |                                  |                        | 580                                  |                                      |                                         |                                 | 35                                                    |                                          | 44                         | 39.4                                          | 1733.6                                          | 545                       | 0.58                                         | 316                 | 2049.7                                       | 409.94                             |                                   | 295                                      | 545                                            | 0.8                      | 436.00                         |                                |               | 442.44                              | -6.44                           | -61.04                            | -67.48                        |
| 188              | 1976 | Wu Congyi                         | 1               | poor peasant               | 14                    | 0                      |                       |                         | 7                              |                           |                           |                                | 68                                     |                           |                                  |                        | 623                                  |                                      |                                         |                                 | 35                                                    |                                          | 68                         | 39.4                                          | 2679.2                                          | 588                       | 0.65                                         | 382                 | 3061.4                                       | 437.3428571                        |                                   | 472                                      | 588                                            | 0.82                     | 482.16                         | 40                             |               | 601.48                              | -79.32                          | -847.66                           | -926.98                       |
| 189              | 1976 | Wu Laifu                          | 1               | poor peasant               | 14                    | 0                      |                       |                         | 7                              |                           |                           |                                | 66                                     |                           |                                  |                        | 521                                  |                                      |                                         |                                 | 35                                                    |                                          | 66                         | 39.4                                          | 2600.4                                          | 486                       | 0.65                                         | 316                 | 2916.3                                       | 416.6142857                        |                                   | 354                                      | 486                                            | 0.82                     | 398.52                         | 28                             |               | 574.25                              | -147.73                         | -529.91                           | -677.64                       |
| 190              | 1976 | Tian Dayu                         | 2               | poor peasant               |                       | 0                      |                       |                         | 1                              |                           |                           |                                | 10                                     |                           |                                  |                        | 365                                  |                                      |                                         |                                 | 10                                                    |                                          | 10                         | 39.4                                          | 394                                             | 365                       | 0.58                                         | 212                 | 605.7                                        | 605.7                              |                                   | 59                                       | 365                                            | 0.8                      | 292.00                         |                                |               | 281.39                              | 10.61                           | 458.38                            | 468.99                        |
| 191              | 1976 | Liu Shuting                       | 2               | poor peasant               | 4                     | 0                      |                       |                         | 5                              |                           |                           |                                | 48                                     |                           |                                  |                        | 375                                  |                                      |                                         |                                 | 10                                                    |                                          | 48                         | 39.4                                          | 1891.2                                          | 365                       | 0.58                                         | 212                 | 2102.9                                       | 420.58                             |                                   | 236                                      | 365                                            | 0.8                      | 292.00                         |                                |               | 360.73                              | -68.73                          | 99.47                             | 30.74                         |
| 192              | 1976 | Meng Tiande                       | 2               | poor peasant               | 14                    | 2                      | 1                     | 1                       | 7                              |                           |                           |                                | 70                                     |                           |                                  |                        | 621                                  |                                      |                                         |                                 | 35                                                    |                                          | 70                         | 39.4                                          | 2758                                            | 586                       | 0.58                                         | 340                 | 3097.88                                      | 442.5542857                        |                                   | 413                                      | 586                                            | 0.8                      | 468.80                         |                                |               | 734.37                              | -265.57                         | 4.36                              | -261.21                       |
| 193              | 1976 | Meng Xiulian                      | 2               | poor peasant               | 4                     | 1                      | 0                     | 1                       | 2                              |                           |                           |                                | 16                                     |                           |                                  |                        | 22                                   |                                      |                                         |                                 | 10                                                    |                                          | 16                         | 39.4                                          | 630.4                                           | 12                        | 0.58                                         | 7                   | 637.36                                       | 318.68                             |                                   | 59                                       | 12                                             | 0.8                      | 9.60                           | 125                            |               | 110.77                              | 23.83                           | -4.84                             | 18.99                         |
| 194              | 1976 | Tian Genlong                      | 2               | poor peasant               | 14                    | 2                      | 1                     | 1                       | 8                              |                           |                           |                                | 74                                     |                           |                                  |                        | 507                                  |                                      |                                         |                                 | 35                                                    |                                          | 74                         | 39.4                                          | 2915.6                                          | 472                       | 0.58                                         | 274                 | 3189.36                                      | 398.67                             |                                   | 354                                      | 472                                            | 0.8                      | 377.60                         |                                |               | 649.27                              | -271.67                         | -607.58                           | -879.25                       |
| 195              | 1976 | Zhao Jinlan                       | 2               | poor peasant               | 4                     | 1                      | 0                     | 1                       | 6                              |                           |                           |                                | 58                                     |                           |                                  |                        | 460                                  |                                      |                                         |                                 | 10                                                    |                                          | 58                         | 39.4                                          | 2285.2                                          | 450                       | 0.58                                         | 261                 | 2546.2                                       | 424.3666667                        |                                   | 295                                      | 450                                            | 0.8                      | 360.00                         | 10                             |               | 436.80                              | -66.80                          | 82.97                             | 16.17                         |
| 196              | 1976 | Liu Peiren                        | 2               | middle-class peasant       | 14                    | 2                      | 1                     | 1                       | 5                              |                           |                           |                                | 48                                     |                           |                                  |                        | 358                                  |                                      |                                         |                                 | 35                                                    |                                          | 48                         | 39.4                                          | 1891.2                                          | 323                       | 0.58                                         | 187                 | 2078.54                                      | 415.708                            |                                   | 295                                      | 323                                            | 0.8                      | 258.40                         |                                |               | 402.88                              | -144.48                         | 45.55                             | -98.93                        |
| 197              | 1976 | Liu Peizhu                        | 2               | middle-class peasant       | 14                    | 2                      | 1                     | 1                       | 4                              |                           |                           |                                | 36                                     |                           |                                  |                        | 383                                  |                                      |                                         |                                 | 35                                                    |                                          | 36                         | 39.4                                          | 1418.4                                          | 348                       | 0.58                                         | 202                 | 1620.24                                      | 405.06                             |                                   | 118                                      | 348                                            | 0.8                      | 278.40                         |                                |               | 421.69                              | -143.29                         | 422.03                            | 278.74                        |
| 198              | 1976 | Liu Peijie                        | 2               | middle-class peasant       | 16                    | 3                      | 1                     | 2                       | 6                              |                           |                           |                                | 54                                     |                           |                                  |                        | 405                                  |                                      |                                         |                                 | 40                                                    |                                          | 54                         | 39.4                                          | 2127.6                                          | 365                       | 0.58                                         | 212                 | 2339.3                                       | 389.8833333                        |                                   | 295                                      | 365                                            | 0.8                      | 292.00                         | 30                             |               | 391.87                              | -69.87                          | -313.72                           | -383.59                       |
| 199              | 1976 | Meng Guilan                       | 2               | poor peasant               | 8                     | 2                      | 0                     | 2                       | 5                              |                           |                           |                                | 50                                     |                           |                                  |                        | 554                                  |                                      |                                         |                                 | 20                                                    |                                          | 50                         | 39.4                                          | 1970                                            | 534                       | 0.58                                         | 310                 | 2279.72                                      | 455.944                            |                                   | 236                                      | 534                                            | 0.8                      | 427.20                         |                                |               | 390.68                              | 36.52                           |                                   | 36.52                         |
| 200              | 1976 | Wang Lianxiang                    | 2               | poor peasant               | 2.5                   | 1                      | 0                     | 1                       | 2                              |                           |                           |                                | 20                                     |                           |                                  |                        | 330                                  |                                      |                                         |                                 | 6                                                     |                                          | 20                         | 39.4                                          | 788                                             | 324                       | 0.58                                         | 188                 | 975.92                                       | 487.96                             |                                   | 118                                      | 324                                            | 0.8                      | 259.20                         |                                |               | 264.85                              | -5.65                           | 87.77                             | 82.12                         |
| 201              | 1976 | Wang Ende                         | 2               | poor peasant               |                       | 0                      |                       |                         | 1                              |                           |                           |                                | 10                                     |                           |                                  |                        |                                      |                                      |                                         |                                 | 10                                                    |                                          | 10                         | 39.4                                          | 394                                             | 0                         | 0.58                                         | 0                   | 394                                          | 394                                |                                   | 118                                      | 0                                              | 0.8                      | 0.00                           | 70                             |               | 69.21                               | 0.79                            | 36.36                             | 37.15                         |
| 202              | 1976 | Meng Mingqing                     | 2               | low-middle-class peasant   |                       | 0                      |                       |                         | 2                              |                           |                           |                                | 20                                     |                           |                                  |                        | 136                                  |                                      |                                         |                                 | 20                                                    |                                          | 20                         | 39.4                                          | 788                                             | 136                       | 0.58                                         | 79                  | 866.88                                       | 433.44                             |                                   | 118                                      | 136                                            | 0.8                      | 108.80                         |                                |               | 233.00                              | -124.20                         | 367.28                            | 243.08                        |
| 203              | 1976 | Meng Tianseng                     | 2               | low-middle-class peasant   | 10                    | 1                      | 1                     | 0                       | 4                              |                           |                           |                                | 34                                     |                           |                                  |                        | 414                                  |                                      |                                         |                                 | 25                                                    |                                          | 34                         | 39.4                                          | 1339.6                                          | 389                       | 0.58                                         | 226                 | 1565.22                                      | 391.305                            |                                   | 236                                      | 389                                            | 0.8                      | 311.20                         |                                |               | 392.13                              | -80.93                          | 202.94                            | 122.01                        |
| 204              | 1976 | Wang Yueming                      | 2               | poor peasant               | 6.5                   | 2                      | 0                     | 2                       | 10                             |                           |                           |                                | 98                                     |                           |                                  |                        | 713                                  |                                      |                                         |                                 | 16                                                    |                                          | 98                         | 39.4                                          | 3861.2                                          | 697                       | 0.58                                         | 404                 | 4265.46                                      | 426.546                            |                                   | 590                                      | 697                                            | 0.8                      | 557.60                         |                                |               | 686.51                              | -128.91                         | 99.31                             | -29.60                        |
| 205              | 1976 | Wang Heshun                       | 2               | poor peasant               | 2.5                   | 1                      | 0                     | 1                       | 6                              |                           |                           |                                | 54                                     |                           |                                  |                        | 593                                  |                                      |                                         |                                 | 54                                                    |                                          | 54                         | 39.4                                          | 2127.6                                          | 593                       | 0.58                                         | 344                 | 2471.54                                      | 411.9233333                        |                                   | 354                                      | 593                                            | 0.8                      | 474.40                         |                                |               | 595.88                              | -121.48                         | 134.64                            | 13.16                         |
| 206              | 1976 | Wen Yingjie                       | 2               | upper-middle-class peasant | 10.5                  | 2                      | 1                     | 1                       | 3                              |                           |                           |                                | 30                                     |                           |                                  |                        | 600                                  |                                      |                                         |                                 | 26                                                    |                                          | 30                         | 39.4                                          | 1083                                            | 574                       | 0.58                                         | 333                 | 1415.92                                      | 471.9733333                        |                                   | 236                                      | 574                                            | 0.8                      | 459.20                         |                                |               | 572.16                              | -112.96                         | 681.18                            | 568.22                        |

(cont.)

| Household number | Year | Name of the head of the household | Production team | Class status (1)         | Basic work points (2) | Total labor forces (3) | Male labor forces (4) | Female labor forces (5) | Total household population (6) | Age: 1 to 3 years old (7) | Age: 4 to 7 years old (8) | Age: 8 years old and above (9) | Work points of grain distribution (10) | Laboring work points (11) | Farmyard manure work points (12) | Total work points (13) | Work points of compulsory labor (14) | Work points of help cultivation (15) | Work points of private plots labor (16) | Total deducted work points (17) | Acutal workdays of participation in distribution (18) | Workpoints for rations distribution (19) | Rations per workpoint (20) | Total rations received form distribution (21) | Workdays of participation in distribu-tion (22) | Grains per workpoint (23) | Total grains distributed by work-points (24) | Grains subsidy (25) | Total Grains received from distribution (26) | Distributed grains per person (27) | Distributed grains per adult (28) | Grains received from privated plots (29) | Workdays of participation in distribution (30) | Value per workpoint (31) | Total value of workpoints (32) | Money used for investment (33) | Sum of income (34) | Money distributed in this year (34) | Deposit/ debt of this year (35) | Deposit/ debt over the years (36) | Accumulated deposit/debt (37) |
|------------------|------|-----------------------------------|-----------------|--------------------------|-----------------------|------------------------|-----------------------|-------------------------|--------------------------------|---------------------------|---------------------------|--------------------------------|----------------------------------------|---------------------------|----------------------------------|------------------------|--------------------------------------|--------------------------------------|-----------------------------------------|---------------------------------|-------------------------------------------------------|------------------------------------------|----------------------------|-----------------------------------------------|-------------------------------------------------|---------------------------|----------------------------------------------|---------------------|----------------------------------------------|------------------------------------|-----------------------------------|------------------------------------------|------------------------------------------------|--------------------------|--------------------------------|--------------------------------|--------------------|-------------------------------------|---------------------------------|-----------------------------------|-------------------------------|
| 207              | 1976 | Liu Peiqian                       | 2               | low-middle-class peasant | 20.5                  | 3                      | 1                     | 2                       | 7                              |                           |                           |                                | 70                                     |                           |                                  | 1226                   |                                      |                                      |                                         | 51                              |                                                       | 70                                       | 39.4                       | 2758                                          | 1175                                            | 0.58                      | 682                                          | 3439.5              | 491.3571429                                  | 413                                | 1175                              | 0.8                                      | 940.00                                         |                          |                                | 1263.39                        | -323.39            | 475.91                              | 152.52                          |                                   |                               |
| 208              | 1976 | Liu Zhaoji                        | 2               | low-middle-class peasant | 14                    | 2                      | 1                     | 1                       | 6                              |                           |                           |                                | 52                                     |                           |                                  | 608                    |                                      |                                      |                                         | 35                              |                                                       | 52                                       | 39.4                       | 2048.8                                        | 573                                             | 0.58                      | 332                                          | 2381.14             | 396.8566667                                  | 295                                | 573                               | 0.8                                      | 458.40                                         |                          |                                | 519.75                         | -61.35             | 106.64                              | 45.29                           |                                   |                               |
| 209              | 1976 | Yu Shengliang                     | 2               | poor peasant             |                       | 0                      |                       |                         | 2                              |                           |                           |                                | 20                                     |                           |                                  | 273                    |                                      |                                      |                                         |                                 |                                                       | 20                                       | 39.4                       | 788                                           | 273                                             | 0.58                      | 158                                          | 946.34              | 473.17                                       | 177                                | 273                               | 0.8                                      | 218.40                                         |                          |                                | 243.00                         | -24.60             | 237.55                              | 212.95                          |                                   |                               |
| 210              | 1976 | Meng Tianyou                      | 1               | poor peasant             |                       | 0                      |                       |                         | 1                              |                           |                           |                                | 10                                     |                           |                                  | 136                    |                                      |                                      |                                         |                                 |                                                       | 10                                       | 39.4                       | 394                                           | 136                                             | 0.65                      | 88                                           | 482.4               | 482.4                                        | 59                                 | 136                               | 0.82                                     | 111.52                                         |                          |                                | 143.31                         | -31.79             | 201.37                              | 169.58                          |                                   |                               |
| 211              | 1976 | Meng Tianfu                       | 2               | middle-class peasant     | 18.5                  | 4                      | 1                     | 3                       | 8                              |                           |                           |                                | 78                                     |                           |                                  | 688                    |                                      |                                      |                                         | 46                              |                                                       | 78                                       | 39.4                       | 3073.2                                        | 642                                             | 0.58                      | 372                                          | 3445.56             | 430.695                                      | 472                                | 642                               | 0.8                                      | 513.60                                         |                          |                                | 696.37                         | -182.77            | -36.36                              | -219.13                         |                                   |                               |
| 212              | 1976 | Meng Xisheng                      | 2               | middle-class peasant     | 14                    | 2                      | 1                     | 1                       | 6                              |                           |                           |                                | 52                                     |                           |                                  | 445                    |                                      |                                      |                                         | 35                              |                                                       | 52                                       | 39.4                       | 2048.8                                        | 410                                             | 0.58                      | 238                                          | 2286.6              | 398                                          | 354                                | 410                               | 0.8                                      | 328.00                                         |                          |                                | 588.38                         | -260.38            | -88.38                              | -348.76                         |                                   |                               |
| 213              | 1976 | Gui Tiankuan                      | 1               | poor peasant             | 14.5                  | 3                      | 1                     | 2                       | 5                              |                           |                           |                                | 50                                     |                           |                                  | 666                    |                                      |                                      |                                         | 36                              |                                                       | 50                                       | 39.4                       | 1970                                          | 630                                             | 0.65                      | 410                                          | 2379.5              | 475.9                                        | 354                                | 630                               | 0.82                                     | 516.60                                         |                          |                                | 733.52                         | -216.92            | 1124.98                             | 908.06                          |                                   |                               |
| 214              | 1976 | Kang Huaizhi                      | 2               | poor peasant             | 14                    | 2                      | 1                     | 1                       | 9                              |                           |                           |                                | 84                                     |                           |                                  | 572                    |                                      |                                      |                                         | 35                              |                                                       | 84                                       | 39.4                       | 3309.6                                        | 537                                             | 0.58                      | 311                                          | 3621.06             | 402.34                                       | 472                                | 537                               | 0.8                                      | 429.60                                         | 58.91                    |                                | 754.54                         | -266.03            | 1311.09                             | 1045.06                         |                                   |                               |
| 215              | 1976 | Liu Huaiqing                      | 2               | poor peasant             | 12                    | 2                      | 1                     | 1                       | 6                              |                           |                           |                                | 58                                     |                           |                                  | 219                    |                                      |                                      |                                         | 30                              |                                                       | 58                                       | 39.4                       | 2285.2                                        | 189                                             | 0.58                      | 110                                          | 2394.82             | 399.1366667                                  | 354                                | 189                               | 0.8                                      | 151.20                                         | 105                      |                                | 397.03                         | -140.83            | 32.86                               | -107.97                         |                                   |                               |
| 216              | 1976 | Meng Xiuying                      | 2               | poor peasant             | 6.5                   | 2                      | 0                     | 2                       | 5                              |                           |                           |                                | 44                                     |                           |                                  | 278                    |                                      |                                      |                                         | 16                              |                                                       | 44                                       | 39.4                       | 1733.6                                        | 262                                             | 0.58                      | 152                                          | 1885.56             | 377.112                                      | 236                                | 262                               | 0.8                                      | 209.60                                         | 200                      |                                | 345.30                         | 64.30              | 437.02                              | 501.32                          |                                   |                               |
| 217              | 1976 | Meng Peiliang                     | 2               | middle-class peasant     | 32                    | 4                      | 3                     | 1                       | 9                              |                           |                           |                                | 88                                     |                           |                                  | 1244                   |                                      |                                      |                                         | 100                             |                                                       | 88                                       | 39.4                       | 3467.2                                        | 1144                                            | 0.58                      | 664                                          | 4130.72             | 458.9688889                                  | 590                                | 1144                              | 0.8                                      | 915.20                                         |                          |                                | 1056.86                        | -141.66            | 957.30                              | 815.64                          |                                   |                               |
| 218              | 1976 | Meng Mingcheng                    | 2               | middle-class peasant     |                       | 0                      |                       |                         |                                |                           |                           |                                |                                        |                           |                                  |                        |                                      |                                      |                                         |                                 |                                                       | 0                                        | 39.4                       | 0                                             | 0                                               | 0.58                      | 0                                            | 0                   | #DIV/o!                                      | 0                                  | 0                                 | 0.8                                      | 0.00                                           |                          |                                |                                | 0.00               |                                     | 0.00                            |                                   |                               |
| 219              | 1976 | Wu Shi'en                         | 1               | poor peasant             | 26                    | 4                      | 2                     | 2                       | 6                              |                           |                           |                                | 54                                     |                           |                                  | 806                    |                                      |                                      |                                         | 65                              |                                                       | 54                                       | 39.4                       | 2127.6                                        | 741                                             | 0.65                      | 482                                          | 2609.25             | 434.875                                      | 354                                | 741                               | 0.82                                     | 607.62                                         |                          |                                | 575.39                         | 32.23              | 190.98                              | 223.21                          |                                   |                               |
| 220              | 1976 | Wang Qingwen                      | 1               | poor peasant             | 22                    | 3                      | 2                     | 1                       | 4                              |                           |                           |                                | 40                                     |                           |                                  | 1130                   |                                      |                                      |                                         | 55                              |                                                       | 40                                       | 39.4                       | 1576                                          | 1075                                            | 0.65                      | 699                                          | 2274.75             | 568.6875                                     | 295                                | 1075                              | 0.82                                     | 881.50                                         | 15                       |                                | 790.48                         | 106.02             | 392.69                              | 498.71                          |                                   |                               |
| 221              | 1976 | Ji Chunmei                        | 1               | poor peasant             |                       | 0                      |                       |                         |                                |                           |                           |                                |                                        |                           |                                  |                        |                                      |                                      |                                         |                                 |                                                       | 0                                        | 39.4                       | 0                                             | 0                                               | 0.65                      | 0                                            | 0                   | #DIV/o!                                      | 0                                  | 0                                 | 0.82                                     | 0.00                                           |                          |                                |                                | 0.00               |                                     | 0.00                            |                                   |                               |
| 222              | 1976 | Li Yushu                          | 1               | poor peasant             | 8                     | 1                      | 1                     | 0                       | 3                              |                           |                           |                                | 30                                     |                           |                                  | 582                    |                                      |                                      |                                         | 20                              |                                                       | 30                                       | 39.4                       | 1182                                          | 562                                             | 0.65                      | 365                                          | 1547.3              | 515.7666667                                  | 177                                | 562                               | 0.82                                     | 460.84                                         |                          |                                | 497.88                         | -37.04             | 783.81                              | 746.77                          |                                   |                               |
| 223              | 1976 | Yu Zhenji                         | 2               | poor peasant             | 10                    | 1                      | 1                     | 0                       | 2                              |                           |                           |                                | 20                                     |                           |                                  | 322                    |                                      |                                      |                                         | 25                              |                                                       | 20                                       | 39.4                       | 788                                           | 297                                             | 0.58                      | 172                                          | 861                 | 430.5                                        | 59                                 | 297                               | 0.8                                      | 237.60                                         |                          |                                | 348.84                         | -111.24            | 434.53                              | 323.29                          |                                   |                               |
| 224              | 1976 | Meng Jinxi                        | 0               | poor peasant             |                       | 0                      |                       |                         |                                |                           |                           |                                |                                        |                           |                                  |                        |                                      |                                      |                                         |                                 |                                                       | 0                                        | 39.4                       | 0                                             | 0                                               | 0.94                      | 0                                            | 0                   | #DIV/o!                                      | 0                                  | 0                                 |                                          | 0                                              |                          |                                | 0.00                           |                    | 0.00                                | 0.00                            |                                   |                               |
| 225              | 1976 | Li Guangkai                       | 1               | poor peasant             |                       | 0                      |                       |                         |                                |                           |                           |                                |                                        |                           |                                  |                        |                                      |                                      |                                         |                                 |                                                       | 0                                        | 39.4                       | 0                                             | 0                                               | 0.65                      | 0                                            | 0                   | #DIV/o!                                      | 0                                  | 0                                 | 0.82                                     | 0.00                                           |                          |                                | 0.00                           |                    | 0.00                                | 0.00                            |                                   |                               |
| 226              | 1976 | Liu Jigeng                        | 2               | poor peasant             | 26.5                  | 4                      | 2                     | 2                       | 8                              |                           |                           |                                | 76                                     |                           |                                  | 776                    |                                      |                                      |                                         | 66                              |                                                       | 76                                       | 39.4                       | 2994.4                                        | 710                                             | 0.58                      | 412                                          | 3406.2              | 425.775                                      | 354                                | 710                               | 0.8                                      | 568.00                                         |                          |                                | 675.52                         | -107.52            | 257.19                              | 149.67                          |                                   |                               |
| 227              | 1976 | Fan Shuzhi                        | 1               | middle-class peasant     | 14                    | 2                      | 1                     | 1                       | 7                              |                           |                           |                                | 64                                     |                           |                                  | 473                    |                                      |                                      |                                         | 35                              |                                                       | 64                                       | 39.4                       | 2521.6                                        | 438                                             | 0.65                      | 285                                          | 2806.3              | 400.9                                        | 354                                | 438                               | 0.82                                     | 359.16                                         | 10                       |                                | 585.27                         | -216.11            | -260.31                             | -476.42                         |                                   |                               |
| 228              | 1976 | Ji Guanglian                      | 1               | low-middle-class peasant | 4                     | 1                      | 0                     | 1                       | 6                              |                           |                           |                                | 52                                     |                           |                                  |                        |                                      |                                      |                                         | 10                              |                                                       | 52                                       | 39.4                       | 1992.8                                        | 0                                               | 0.65                      | 0                                            | 1992.8              | 332.1333333                                  | 236                                | 0                                 | 0.82                                     | 0.00                                           | 250                      |                                | 292.36                         | -42.36             | -7.48                               | -49.84                          |                                   |                               |
| 229              | 1976 | Yang Xiaozhong                    | 1               | low-middle-class peasant | 14                    | 2                      | 1                     | 1                       | 5                              |                           |                           |                                |                                        |                           |                                  |                        |                                      |                                      |                                         |                                 |                                                       | 0                                        | 39.4                       | 0                                             | 0                                               | 0.65                      | 0                                            | 0                   | 0                                            | 295                                | 0                                 | 0.82                                     | 0.00                                           |                          |                                |                                | 0.00               |                                     | 0.00                            |                                   |                               |

(cont.)

| Household number | Year | Name of the head of the household | Production team | Class status (1)         | Basic work points (2) | Total labor forces (3) | Male labor forces (4) | Female labor forces (5) | Total household population (6) | Age: 1 to 3 years old (7) | Age: 4 to 7 years old (8) | Age: 8 years old and above (9) | Work points of grain distribution (10) | Laboring work points (11) | Farmyard manure work points (12) | Total work points (13) | Work points of compulsory labor (14) | Work points of help cultivation (15) | Work points of private plots labor (16) | Total deducted work points (17) | Acutal workdays of participation in distribution (18) | Workpoints for rations distribution (19) | Rations per workpoint (20) | Total rations received form distribution (21) | Workdays of participation in distribu-tion (22) | Grains per workpoint (23) | Total grains distributed by work-points (24) | Grains subsidy (25) | Total Grains received from distribution (26) | Distributed grains per person (27) | Distributed grains per adult (28) | Grains received from privated plots (29) | Workdays of participation in distribution (30) | Value per workpoint (31) | Total value of workpoints (32) | Money used for investment (33) | Sum of income (34) | Money distributed in this year (34) | Deposit/ debt of this year (35) | Deposit/ debt over the years (36) | Accumulated deposit/debt (37) |
|------------------|------|-----------------------------------|-----------------|--------------------------|-----------------------|------------------------|-----------------------|-------------------------|--------------------------------|---------------------------|---------------------------|--------------------------------|----------------------------------------|---------------------------|----------------------------------|------------------------|--------------------------------------|--------------------------------------|-----------------------------------------|---------------------------------|-------------------------------------------------------|------------------------------------------|----------------------------|-----------------------------------------------|-------------------------------------------------|---------------------------|----------------------------------------------|---------------------|----------------------------------------------|------------------------------------|-----------------------------------|------------------------------------------|------------------------------------------------|--------------------------|--------------------------------|--------------------------------|--------------------|-------------------------------------|---------------------------------|-----------------------------------|-------------------------------|
| 230              | 1976 | Meng Minghong                     | 2               | middle-class peasant     | 14                    | 2                      | 1                     | 1                       | 5                              |                           |                           |                                | 44                                     |                           |                                  |                        | 526                                  |                                      |                                         |                                 | 35                                                    |                                          | 44                         | 39.4                                          | 1733.6                                          | 491                       | 0.58                                         | 285                 | 2018.38                                      | 403.676                            |                                   | 236                                      | 491                                            | 0.8                      | 392.80                         |                                |                    | 473.08                              | -80.28                          | 191.13                            | 110.85                        |
| 231              | 1976 | Zhang Xuewen                      | 0               | poor peasant             |                       | 0                      |                       |                         |                                |                           |                           |                                |                                        |                           |                                  |                        |                                      |                                      |                                         |                                 |                                                       | 0                                        | 39.4                       | 0                                             | 0                                               | 0.94                      | 0                                            | 0                   | #DIV/0!                                      |                                    | 0                                 | 0                                        |                                                | 0.00                     |                                |                                | 0.00               |                                     | 0.00                            |                                   |                               |
| 232              | 1976 | Wu Jingxiu                        | 0               | middle-class peasant     |                       | 0                      |                       |                         |                                |                           |                           |                                |                                        |                           |                                  |                        |                                      |                                      |                                         |                                 |                                                       | 0                                        | 39.4                       | 0                                             | 0                                               | 0.94                      | 0                                            | 0                   | #DIV/0!                                      |                                    | 0                                 | 0                                        |                                                | 0.00                     |                                |                                | 0.00               |                                     | 0.00                            |                                   |                               |
| 233              | 1976 | Fan Shugen                        | 2               | middle-class peasant     | 14                    | 2                      | 1                     | 1                       | 4                              |                           |                           |                                | 36                                     |                           |                                  |                        | 551                                  |                                      |                                         |                                 | 35                                                    |                                          | 36                         | 39.4                                          | 1418.4                                          | 516                       | 0.58                                         | 299                 | 1717.68                                      | 429.42                             |                                   | 177                                      | 516                                            | 0.8                      | 412.80                         |                                |                    | 588.65                              | -175.85                         | 684.78                            | 508.93                        |
| 234              | 1976 | Yang Xiaoheng                     | 1               |                          |                       | 0                      |                       |                         |                                |                           |                           |                                |                                        |                           |                                  |                        |                                      |                                      |                                         |                                 |                                                       | 0                                        | 39.4                       | 0                                             | 0                                               | 0.65                      | 0                                            | 0                   | #DIV/0!                                      |                                    | 0                                 | 0                                        | 0.82                                           | 0.00                     |                                |                                | 0.00               |                                     | 0.00                            |                                   |                               |
| 235              | 1976 | Fan Xuewen                        | 1               |                          |                       | 0                      |                       |                         | 2                              |                           |                           |                                | 20                                     |                           |                                  |                        |                                      |                                      |                                         |                                 |                                                       | 20                                       | 39.4                       | 788                                           | 0                                               | 0.58                      | 0                                            | 788                 | 394                                          |                                    | 118                               | 0                                        | 0.8                                            | 0.00                     | 115                            | 100.44                         | 14.56              | -62.28                              | -47.72                          |                                   |                               |
| 236              | 1976 | Liu Yuzhen                        | 1               |                          |                       | 0                      |                       |                         |                                |                           |                           |                                |                                        |                           |                                  |                        |                                      |                                      |                                         |                                 |                                                       | 0                                        | 39.4                       | 0                                             | 0                                               | 0.65                      | 0                                            | 0                   | #DIV/0!                                      |                                    | 0                                 | 0                                        | 0.82                                           | 0.00                     |                                |                                | 0.00               |                                     | 0.00                            |                                   |                               |
| 237              | 1976 | Mu Chuncui                        | 1               | poor peasant             |                       | 0                      |                       |                         | 1                              |                           |                           |                                | 10                                     |                           |                                  |                        |                                      |                                      |                                         |                                 |                                                       | 10                                       | 39.4                       | 394                                           | 0                                               | 0.65                      | 0                                            | 394                 | 394                                          |                                    | 59                                | 0                                        | 0.82                                           | 0.00                     | 93.65                          | 38.95                          | 54.70              | -93.65                              | -38.95                          |                                   |                               |
| 238              | 1976 | Meng Mingliang                    | 2               | poor peasant             |                       | 0                      |                       |                         |                                |                           |                           |                                |                                        |                           |                                  |                        |                                      |                                      |                                         |                                 |                                                       | 0                                        | 39.4                       | 0                                             | 0                                               | 0.58                      | 0                                            | 0                   | #DIV/0!                                      |                                    | 0                                 | 0                                        | 0.8                                            | 0.00                     |                                |                                | 0.00               |                                     | 0.00                            |                                   |                               |
| 239              | 1976 | Wang Guilan                       | 1               | poor peasant             |                       | 0                      |                       |                         | 1                              |                           |                           |                                | 10                                     |                           |                                  | 71                     |                                      |                                      |                                         |                                 |                                                       | 10                                       | 39.4                       | 394                                           | 71                                              | 0.65                      | 46                                           | 440.15              | 440.15                                       |                                    | 59                                | 71                                       | 0.82                                           | 58.22                    |                                |                                | 139.78             | -81.56                              | 261.73                          | 180.17                            |                               |
| 240              | 1976 | Wang Chuanxian                    | 1               | poor peasant             | 14                    | 2                      | 1                     | 1                       | 6                              |                           |                           |                                | 54                                     |                           |                                  |                        | 657                                  |                                      |                                         |                                 | 35                                                    |                                          | 54                         | 39.4                                          | 2127.6                                          | 622                       | 0.65                                         | 404                 | 2531.9                                       | 421.9833333                        |                                   | 236                                      | 622                                            | 0.82                     | 510.04                         |                                |                    | 530.15                              | -20.11                          | 66.70                             | 46.59                         |
| 241              | 1976 | Wang Zhenquan                     | 1               | poor peasant             |                       | 0                      |                       |                         | 3                              |                           |                           |                                | 30                                     |                           |                                  | 300                    |                                      |                                      |                                         |                                 |                                                       | 30                                       | 39.4                       | 1182                                          | 300                                             | 0.65                      | 195                                          | 1377                | 459                                          |                                    | 177                               | 300                                      | 0.82                                           | 246.00                   |                                |                                | 260.56             | -14.56                              | 63.28                           | 48.72                             |                               |
| 243              | 1976 | Li Xiuying                        | 1               | poor peasant             |                       | 0                      |                       |                         |                                |                           |                           |                                |                                        |                           |                                  |                        |                                      |                                      |                                         |                                 |                                                       | 0                                        | 39.4                       | 0                                             | 0                                               | 0.65                      | 0                                            | 0                   | #DIV/0!                                      |                                    | 0                                 | 0                                        | 0.82                                           | 0.00                     |                                |                                | 0.00               |                                     | 0.00                            |                                   |                               |
| 244              | 1976 | Meng Jingxi                       | 1               | poor peasant             |                       | 0                      |                       |                         |                                |                           |                           |                                |                                        |                           |                                  |                        |                                      |                                      |                                         |                                 |                                                       | 0                                        | 39.4                       | 0                                             | 0                                               | 0.65                      | 0                                            | 0                   | #DIV/0!                                      |                                    | 0                                 | 0                                        | 0.82                                           | 0.00                     |                                |                                | 0.00               |                                     | 0.00                            |                                   |                               |
| 245              | 1976 | Cao Jinren                        | 1               | poor peasant             |                       | 0                      |                       |                         |                                |                           |                           |                                |                                        |                           |                                  |                        |                                      |                                      |                                         |                                 |                                                       | 0                                        | 39.4                       | 0                                             | 0                                               | 0.65                      | 0                                            | 0                   | #DIV/0!                                      |                                    | 0                                 | 0                                        | 0.82                                           | 0.00                     |                                |                                | 0.00               |                                     | 0.00                            |                                   |                               |
| 247              | 1976 | Wu Jinggui                        | 1               | poor peasant             | 14.5                  | 0                      |                       |                         | 5                              |                           |                           |                                | 50                                     |                           |                                  | 780                    |                                      |                                      |                                         |                                 |                                                       | 50                                       | 39.4                       | 1970                                          | 744                                             | 0.65                      | 484                                          | 2453.6              | 490.72                                       |                                    | 354                               | 744                                      | 0.82                                           | 610.08                   |                                |                                | 822.48             | -212.40                             | 1227.72                         | 1015.32                           |                               |
| 248              | 1976 | Zhang Yucang                      | 1               |                          |                       | 0                      |                       |                         |                                |                           |                           |                                |                                        |                           |                                  |                        |                                      |                                      |                                         |                                 |                                                       | 0                                        | 39.4                       | 0                                             | 0                                               | 0.65                      | 0                                            | 0                   | #DIV/0!                                      |                                    | 0                                 | 0                                        | 0.82                                           | 0.00                     |                                |                                | 0.00               |                                     | 0.00                            |                                   |                               |
| 249              | 1976 | Zhang Lirong                      | 2               | poor peasant             |                       | 0                      |                       |                         |                                |                           |                           |                                |                                        |                           |                                  |                        |                                      |                                      |                                         |                                 |                                                       | 0                                        | 39.4                       | 0                                             | 0                                               | 0.58                      | 0                                            | 0                   | #DIV/0!                                      |                                    | 0                                 | 0                                        | 0.8                                            | 0.00                     |                                |                                | 0.00               |                                     | 0.00                            |                                   |                               |
| 250              | 1976 | Zhang Liwen                       | 2               | poor peasant             | 14                    | 2                      | 1                     | 1                       | 5                              |                           |                           |                                | 44                                     |                           |                                  | 626                    |                                      |                                      |                                         |                                 |                                                       | 44                                       | 39.4                       | 1733.6                                        | 591                                             | 0.58                      | 343                                          | 2076.38             | 415.276                                      |                                    | 236                               | 591                                      | 0.8                                            | 472.80                   |                                |                                | 579.95             | -107.15                             | 325.53                          | 218.38                            |                               |
| 251              | 1976 | Liu Ning                          | 2               |                          | 14                    | 2                      | 1                     | 1                       | 4                              |                           |                           |                                | 34                                     |                           |                                  | 637                    |                                      |                                      |                                         |                                 |                                                       | 34                                       | 39.4                       | 1339.6                                        | 602                                             | 0.58                      | 349                                          | 1688.76             | 422.19                                       |                                    | 236                               | 602                                      | 0.8                                            | 481.60                   |                                |                                | 610.28             | -128.68                             | 457.19                          | 328.51                            |                               |
| 252              | 1976 | Niu Lanmei                        | 2               | poor peasant             | 4                     | 1                      | 0                     | 1                       | 3                              |                           |                           |                                | 24                                     |                           |                                  | 22                     |                                      |                                      |                                         |                                 |                                                       | 10                                       | 39.4                       | 945.6                                         | 12                                              | 0.58                      | 7                                            | 952.56              | 317.52                                       |                                    | 118                               | 12                                       | 0.8                                            | 9.60                     | 85                             | 135.06                         | -40.46             | -221.81                             | -262.27                         |                                   |                               |
| 253              | 1976 | Meng Minglu                       | 2               | low-middle-class peasant | 30.5                  | 4                      | 3                     | 1                       | 5                              |                           |                           |                                | 50                                     |                           |                                  | 1093                   |                                      |                                      |                                         |                                 |                                                       | 50                                       | 39.4                       | 1970                                          | 1017                                            | 0.58                      | 590                                          | 2559.86             | 511.972                                      |                                    | 295                               | 1017                                     | 0.8                                            | 813.60                   |                                |                                | 841.47             | -27.87                              | 1419.99                         | 1392.12                           |                               |
| 256              | 1976 | Cui Yongfu                        | 2               | poor peasant             |                       | 0                      |                       |                         |                                |                           |                           |                                |                                        |                           |                                  |                        |                                      |                                      |                                         |                                 |                                                       | 0                                        | 39.4                       | 0                                             | 0                                               | 0.58                      | 0                                            | 0                   | #DIV/0!                                      |                                    | 0                                 | 0                                        | 0.8                                            | 0.00                     |                                |                                | 0.00               |                                     | 0.00                            |                                   |                               |
| 257              | 1976 | An Guobao                         | 1               | teacher                  |                       | 0                      |                       |                         |                                |                           |                           |                                |                                        |                           |                                  |                        |                                      |                                      |                                         |                                 |                                                       | 0                                        | 39.4                       | 0                                             | 0                                               | 0.65                      | 0                                            | 0                   | #DIV/0!                                      |                                    | 0                                 | 0                                        | 0.82                                           | 0.00                     | 20                             | 8.23                           | 11.77              | -53.13                              | -41.36                          |                                   |                               |
| 258              | 1976 | Liang Guangsheng                  |                 | teacher                  |                       | 0                      |                       |                         |                                |                           |                           |                                |                                        |                           |                                  |                        |                                      |                                      |                                         |                                 |                                                       | 0                                        | 39.4                       | 0                                             | 0                                               | 0.94                      | 0                                            | 0                   | #DIV/0!                                      |                                    | 0                                 | 0                                        |                                                | 0.00                     |                                |                                | 0.00               |                                     | 0.00                            |                                   |                               |
| 259              | 1976 | Liu Jinlian                       |                 | teacher                  |                       | 0                      |                       |                         |                                |                           |                           |                                |                                        |                           |                                  |                        |                                      |                                      |                                         |                                 |                                                       | 0                                        | 39.4                       | 0                                             | 0                                               | 0.94                      | 0                                            | 0                   | #DIV/0!                                      |                                    | 0                                 | 0                                        |                                                | 0.00                     |                                |                                | 0.00               |                                     | 0.00                            |                                   |                               |
| 260              | 1976 | Liu Xuexu                         |                 | cadre                    |                       | 0                      |                       |                         |                                |                           |                           |                                |                                        |                           |                                  |                        |                                      |                                      |                                         |                                 |                                                       | 0                                        | 39.4                       | 0                                             | 0                                               | 0.94                      | 0                                            | 0                   | #DIV/0!                                      |                                    | 0                                 | 0                                        |                                                | 0.00                     |                                |                                | 0.00               |                                     | 0.00                            |                                   |                               |
| 261              | 1976 | Huang Qingxiang                   |                 | teacher                  |                       | 0                      |                       |                         |                                |                           |                           |                                |                                        |                           |                                  |                        |                                      |                                      |                                         |                                 |                                                       | 0                                        | 39.4                       | 0                                             | 0                                               | 0.94                      | 0                                            | 0                   | #DIV/0!                                      |                                    | 0                                 | 0                                        |                                                | 0.00                     |                                |                                | 0.00               |                                     | 0.00                            |                                   |                               |



(cont.)

| Household number | Year | Name of the head of the household | Production team | Class status (1)     | Basic work points (2) | Total labor forces (3) | Male labor forces (4) | Female labor forces (5) | Total household population (6) | Age: 1 to 3 years old (7) | Age: 4 to 7 years old (8) | Age: 8 years old and above (9) | Work points of grain distribution (10) | Laboring work points (11) | Farmyard manure work points (12) | Total work points (13) | Work points of compulsory labor (14) | Work points of help cultivation (15) | Work points of private plots labor (16) | Total deducted work points (17) | Actual workdays of participation in distribution (18) | Workpoints for rations distribution (19) | Rations per workpoint (20) | Total rations received from distribution (21) | Workdays of participation in distribution (22) | Grains per workpoint (23) | Total grains distributed by work-points (24) | Grains subsidy (25) | Total Grains received from distribution (26) | Distributed grains per person (27) | Distributed grains per adult (28) | Grains received from private plots (29) | Workdays of participation in distribution (30) | Value per workpoint (31) | Total value of workpoints (32) | Money used for investment (33) | Sum of income (34) | Money distributed in this year (34) | Deposit/debt of this year (35) | Deposit/debt over the years (36) | Accumulated deposit/debt (37) |
|------------------|------|-----------------------------------|-----------------|----------------------|-----------------------|------------------------|-----------------------|-------------------------|--------------------------------|---------------------------|---------------------------|--------------------------------|----------------------------------------|---------------------------|----------------------------------|------------------------|--------------------------------------|--------------------------------------|-----------------------------------------|---------------------------------|-------------------------------------------------------|------------------------------------------|----------------------------|-----------------------------------------------|------------------------------------------------|---------------------------|----------------------------------------------|---------------------|----------------------------------------------|------------------------------------|-----------------------------------|-----------------------------------------|------------------------------------------------|--------------------------|--------------------------------|--------------------------------|--------------------|-------------------------------------|--------------------------------|----------------------------------|-------------------------------|
| 262              | 1976 | Han Junxiu                        |                 | cadre                |                       | 0                      |                       |                         |                                |                           |                           |                                |                                        |                           |                                  |                        |                                      |                                      |                                         |                                 |                                                       | 0                                        | 39.4                       | 0                                             | 0                                              | 0.94                      | 0                                            | 0                   | #DIV/0!                                      |                                    | 0                                 | 0                                       |                                                | 0.00                     |                                |                                | 0.00               |                                     |                                | 0.00                             |                               |
| 263              | 1976 | Li Yonggong                       |                 | cadre                |                       | 0                      |                       |                         |                                |                           |                           |                                |                                        |                           |                                  |                        |                                      |                                      |                                         |                                 |                                                       | 0                                        | 39.4                       | 0                                             | 0                                              | 0.94                      | 0                                            | 0                   | #DIV/0!                                      |                                    | 0                                 | 0                                       |                                                | 0.00                     |                                |                                | 0.00               |                                     |                                | 0.00                             |                               |
| 264              | 1976 | Ge Changliang                     |                 | teacher              |                       | 0                      |                       |                         |                                |                           |                           |                                |                                        |                           |                                  |                        |                                      |                                      |                                         |                                 |                                                       | 0                                        | 39.4                       | 0                                             | 0                                              | 0.94                      | 0                                            | 0                   | #DIV/0!                                      |                                    | 0                                 | 0                                       |                                                | 0.00                     |                                |                                | 0.00               |                                     |                                | 0.00                             |                               |
| 265              | 1976 | Liu Baochang                      | 1               | poor peasant         | 14                    | 2                      | 1                     | 1                       | 4                              |                           |                           |                                | 32                                     |                           |                                  |                        | 628                                  |                                      |                                         |                                 | 35                                                    | 32                                       | 39.4                       | 1167.8                                        | 593                                            | 0.65                      | 385                                          | 1553.25             | 388.3125                                     | 59                                 | 593                               | 0.82                                    | 486.26                                         |                          |                                | 624.53                         | -138.27            | 404.07                              | 265.80                         |                                  |                               |
| 266              | 1976 | Wang Wenkui                       | 1               | cadre                | 14                    | 2                      | 1                     | 1                       | 2                              |                           |                           |                                | 20                                     |                           |                                  |                        | 451                                  |                                      |                                         |                                 | 35                                                    | 20                                       | 39.4                       | 788                                           | 416                                            | 0.65                      | 270                                          | 1058.4              | 529.2                                        | 118                                | 416                               | 0.82                                    | 341.12                                         |                          |                                | 358.1                          | -16.98             | 263.92                              | 246.94                         |                                  |                               |
| 267              | 1976 | Zhao Pingfen                      | 1               | poor peasant         | 14                    | 2                      | 1                     | 1                       | 4                              |                           |                           |                                | 36                                     |                           |                                  |                        | 510                                  |                                      |                                         |                                 | 35                                                    | 36                                       | 39.4                       | 1418.4                                        | 475                                            | 0.65                      | 309                                          | 1727.15             | 431.7875                                     | 177                                | 475                               | 0.82                                    | 389.50                                         |                          |                                | 445.32                         | -55.82             | 350.16                              | 294.34                         |                                  |                               |
| 268              | 1976 | Gao Peiseng                       | 1               | poor peasant         | 14                    | 2                      | 1                     | 1                       | 3                              |                           |                           |                                | 26                                     |                           |                                  |                        | 419                                  |                                      |                                         |                                 | 35                                                    | 26                                       | 39.4                       | 1024.4                                        | 384                                            | 0.58                      | 223                                          | 1247.12             | 424.7                                        | 177                                | 384                               | 0.82                                    | 314.88                                         |                          |                                | 386.68                         | -71.80             | 354.53                              | 282.73                         |                                  |                               |
| 269              | 1976 | Gao Peilin                        | 1               | poor peasant         | 14                    | 2                      | 1                     | 1                       | 4                              |                           |                           |                                | 34                                     |                           |                                  |                        | 519                                  |                                      |                                         |                                 | 35                                                    | 34                                       | 39.4                       | 1339.6                                        | 484                                            | 0.65                      | 315                                          | 1654.2              | 413.55                                       | 118                                | 484                               | 0.82                                    | 396.88                                         |                          |                                | 536.51                         | -139.63            | 351.15                              | 211.52                         |                                  |                               |
| 270              | 1976 | Meng Fangli                       | 1               | middle-class peasant | 4                     | 1                      | 0                     | 1                       | 5                              |                           |                           |                                | 44                                     |                           |                                  |                        | 209                                  |                                      |                                         |                                 | 10                                                    | 44                                       | 39.4                       | 1733.6                                        | 199                                            | 0.65                      | 129                                          | 1862.95             | 372.59                                       | 177                                | 199                               | 0.82                                    | 163.18                                         | 105                      |                                | 294.31                         | -26.13             | -0.59                               | -26.72                         |                                  |                               |
| 271              | 1976 | Lan Weiyong                       | 1               | poor peasant         | 4                     | 1                      | 0                     | 1                       | 3                              |                           |                           |                                | 24                                     |                           |                                  |                        | 160                                  |                                      |                                         |                                 | 10                                                    | 24                                       | 39.4                       | 945.6                                         | 150                                            | 0.65                      | 98                                           | 1043.1              | 347.7                                        | 177                                | 150                               | 0.82                                    | 123.00                                         | 50                       |                                | 180.56                         | -7.56              | 16.15                               | 8.59                           |                                  |                               |
| 272              | 1976 | Meng Tianyu                       | 1               | poor peasant         | 23                    |                        |                       |                         | 5                              |                           |                           |                                | 50                                     |                           |                                  |                        | 923                                  |                                      |                                         |                                 | 56                                                    | 50                                       | 39.4                       | 1970                                          | 867                                            | 0.58                      | 503                                          | 2473                | 494.6                                        | 295                                | 867                               | 0.8                                     | 693.60                                         |                          |                                | 655.37                         | 38.23              | 779.56                              | 817.79                         |                                  |                               |
| 273              | 1976 | Wang Yongmei                      | 1               | teacher              |                       | 0                      |                       |                         |                                |                           |                           |                                |                                        |                           |                                  |                        |                                      |                                      |                                         |                                 | 0                                                     | 39.4                                     | 0                          | 0                                             | 0.65                                           | 0                         | 0                                            | #DIV/0!             |                                              | 0                                  | 0                                 | 0.82                                    | 0.00                                           |                          |                                | 0.00                           |                    |                                     | 0.00                           |                                  |                               |
| 274              | 1976 | Wang Chuanding                    | 2               | teacher              |                       | 0                      |                       |                         |                                |                           |                           |                                |                                        |                           |                                  |                        |                                      |                                      |                                         |                                 | 0                                                     | 39.4                                     | 0                          | 0                                             | 0.58                                           | 0                         | 0                                            | #DIV/0!             |                                              | 0                                  | 0                                 | 0.8                                     | 0.00                                           | 20                       |                                | 30.67                          | -10.67             | -24.64                              | -35.31                         |                                  |                               |
| 276              | 1976 | Cui Yili                          | 2               | poor peasant         | 14                    | 2                      | 1                     | 1                       | 3                              |                           |                           |                                | 26                                     |                           |                                  |                        | 509                                  |                                      |                                         |                                 | 35                                                    | 26                                       | 39.4                       | 1005.4                                        | 474                                            | 0.58                      | 275                                          | 1280.32             | 426.7733333                                  | 59                                 | 474                               | 0.8                                     | 379.20                                         |                          |                                | 411.7                          | -32.50             | 15.1                                | -17.40                         |                                  |                               |
| 277              | 1976 | Liu Xiangting                     | 2               | poor peasant         | 4                     | 1                      | 0                     | 1                       |                                |                           |                           |                                |                                        |                           |                                  |                        |                                      |                                      |                                         |                                 | 0                                                     | 39.4                                     | 0                          | 0                                             | 0.58                                           | 0                         | 0                                            | #DIV/0!             |                                              | 0                                  | 0                                 | 0.8                                     | 0.00                                           |                          |                                | 0.00                           |                    |                                     | 0.00                           |                                  |                               |
| 278              | 1976 | Meng Hulin                        | 2               | poor peasant         | 14                    | 2                      | 1                     | 1                       | 3                              |                           |                           |                                | 26                                     |                           |                                  |                        | 389                                  |                                      |                                         |                                 | 35                                                    | 26                                       | 39.4                       | 1024.4                                        | 354                                            | 0.58                      | 205                                          | 1229.72             | 409.9066667                                  | 59                                 | 351                               | 0.8                                     | 280.80                                         |                          |                                | 316.36                         | -35.56             | 194.8                               | 159.24                         |                                  |                               |
| 279              | 1976 | Gui Haigeng                       | 1               | poor peasant         | 4                     | 1                      | 0                     | 1                       | 3                              |                           |                           |                                | 24                                     |                           |                                  |                        | 98                                   |                                      |                                         |                                 | 10                                                    | 24                                       | 39.4                       | 945.6                                         | 88                                             | 0.65                      | 57                                           | 1002.8              | 334.2666667                                  | 177                                | 88                                | 0.82                                    | 72.16                                          | 60                       |                                | 205.77                         | -73.61             | 42.42                               | -31.19                         |                                  |                               |
| 280              | 1976 | Meng Tianfu                       | 2               | poor peasant         | 14                    | 0                      |                       |                         | 3                              |                           |                           |                                | 26                                     |                           |                                  |                        | 590                                  |                                      |                                         |                                 | 35                                                    | 26                                       | 39.4                       | 1024.4                                        | 555                                            | 0.58                      | 322                                          | 1346.3              | 448.7666667                                  | 59                                 | 555                               | 0.8                                     | 444.00                                         |                          |                                | 481.31                         | -37.31             | 635.57                              | 598.26                         |                                  |                               |
| 282              | 1976 | Liu Peiyi                         | 1               | poor peasant         |                       | 0                      |                       |                         |                                |                           |                           |                                |                                        |                           |                                  |                        |                                      |                                      |                                         |                                 | 0                                                     | 39.4                                     | 0                          | 0                                             | 0.65                                           | 0                         | 0                                            | #DIV/0!             |                                              | 0                                  | 0                                 | 0.82                                    | 0.00                                           |                          |                                | 0.00                           |                    |                                     | 0.00                           |                                  |                               |
| 283              | 1976 | Wang Jie                          | 1               | poor peasant         |                       | 0                      |                       |                         |                                |                           |                           |                                |                                        |                           |                                  |                        |                                      |                                      |                                         |                                 | 0                                                     | 39.4                                     | 0                          | 0                                             | 0.65                                           | 0                         | 0                                            | #DIV/0!             |                                              | 0                                  | 0                                 | 0.82                                    | 0.00                                           |                          |                                | 0.00                           |                    |                                     | 0.00                           |                                  |                               |
| 284              | 1976 | Zhang Guangxue                    | 1               |                      |                       | 0                      |                       |                         |                                |                           |                           |                                |                                        |                           |                                  |                        |                                      |                                      |                                         |                                 | 0                                                     | 39.4                                     | 0                          | 0                                             | 0.65                                           | 0                         | 0                                            | #DIV/0!             |                                              | 0                                  | 0                                 | 0.82                                    | 0.00                                           |                          |                                | 0.00                           |                    |                                     | 0.00                           |                                  |                               |
| 285              | 1976 | Wu Weiyi                          | 2               |                      | 20.5                  | 0                      |                       |                         | 6                              |                           |                           |                                | 56                                     |                           |                                  |                        | 696                                  |                                      |                                         |                                 | 51                                                    | 56                                       | 39.4                       | 2206.4                                        | 645                                            | 0.58                      | 374                                          | 2580.5              | 430.0833333                                  | 236                                | 645                               | 0.8                                     | 516.00                                         |                          |                                | 557.9                          | -41.90             | 83.87                               | 41.97                          |                                  |                               |
| 286              | 1976 | Wang Shusheng                     | 2               | poor peasant         | 14                    | 2                      | 1                     | 1                       | 3                              |                           |                           |                                | 26                                     |                           |                                  |                        | 226                                  |                                      |                                         |                                 | 35                                                    | 26                                       | 39.4                       | 1024.4                                        | 191                                            | 0.58                      | 111                                          | 1135.18             | 388.5                                        | 59                                 | 191                               | 0.8                                     | 152.80                                         |                          |                                | 244.76                         | -91.96             | 18.66                               | -73.30                         |                                  |                               |
| 287              | 1976 | Niu Rusheng                       | 1               | educated youth       |                       | 0                      |                       |                         |                                |                           |                           |                                |                                        |                           |                                  |                        |                                      |                                      |                                         |                                 | 0                                                     | 39.4                                     | 0                          | 0                                             | 0.65                                           | 0                         | 0                                            | #DIV/0!             |                                              | 0                                  | 0                                 | 0.82                                    | 0.00                                           |                          |                                | 0.00                           |                    |                                     | 0.00                           |                                  |                               |
| 288              | 1976 | Yan Lianglian                     |                 | educated youth       |                       | 0                      |                       |                         |                                |                           |                           |                                |                                        |                           |                                  |                        |                                      |                                      |                                         |                                 | 0                                                     | 39.4                                     | 0                          | 0                                             | 0                                              | 0                         | 0                                            | #DIV/0!             |                                              | 0                                  | 0                                 | 0                                       | 0.00                                           |                          |                                | 0.00                           |                    |                                     | 0.00                           |                                  |                               |
| 289              | 1976 | Huang Hailian                     |                 | educated youth       |                       | 0                      |                       |                         |                                |                           |                           |                                |                                        |                           |                                  |                        |                                      |                                      |                                         |                                 | 0                                                     | 39.4                                     | 0                          | 0                                             | 0                                              | 0                         | 0                                            | #DIV/0!             |                                              | 0                                  | 0                                 | 0                                       | 0.00                                           |                          |                                | 0.00                           |                    |                                     | 0.00                           |                                  |                               |
| 290              | 1976 | Zhou Xiuhua                       |                 | educated youth       |                       | 0                      |                       |                         |                                |                           |                           |                                |                                        |                           |                                  |                        |                                      |                                      |                                         |                                 | 0                                                     | 39.4                                     | 0                          | 0                                             | 0                                              | 0                         | 0                                            | #DIV/0!             |                                              | 0                                  | 0                                 | 0                                       | 0.00                                           |                          |                                | 0.00                           |                    |                                     | 0.00                           |                                  |                               |
| 291              | 1976 | Lan Aiyiing                       | 2               | educated youth       |                       | 0                      |                       |                         |                                |                           |                           |                                |                                        |                           |                                  |                        |                                      |                                      |                                         |                                 | 0                                                     | 39.4                                     | 0                          | 0                                             | 0.58                                           | 0                         | 0                                            | #DIV/0!             |                                              | 0                                  | 0                                 | 0.8                                     | 0.00                                           |                          |                                | 0.00                           |                    |                                     | 0.00                           |                                  |                               |
| 292              | 1976 | Meng Erlin                        | 2               |                      | 10                    | 0                      |                       |                         |                                |                           |                           |                                |                                        |                           |                                  |                        | 533                                  |                                      |                                         |                                 | 25                                                    | 0                                        | 39.4                       | 0                                             | 396                                            | 0.65                      | 257                                          | 257.4               | #DIV/0!                                      | 0                                  | 396                               | 0.82                                    | 324.72                                         |                          |                                | 324.72                         |                    |                                     | 324.72                         |                                  |                               |
| 293              | 1976 | Liu Jinting                       | 2               |                      |                       | 0                      |                       |                         |                                |                           |                           |                                |                                        |                           |                                  |                        |                                      |                                      |                                         |                                 | 0                                                     | 39.4                                     | 0                          | 0                                             | 0.58                                           | 0                         | 0                                            | #DIV/0!             |                                              | 0                                  | 0                                 | 0.8                                     | 0.00                                           |                          |                                | 0.00                           |                    |                                     | 0.00                           |                                  |                               |
| 294              | 1976 | Meng Peilin4                      | 2               |                      | 24.5                  | 0                      |                       |                         | 4                              |                           |                           |                                | 40                                     |                           |                                  |                        | 1197                                 |                                      |                                         |                                 | 61                                                    | 40                                       | 39.4                       | 1576                                          | 1136                                           | 0.58                      | 659                                          | 2234.88             | 558.72                                       | 295                                | 1136                              | 0.8                                     | 908.80                                         |                          |                                | 967.51                         | -58.71             | 1335.96                             | 1277.25                        |                                  |                               |

(cont.)

| Household number | Year | Name of the head of the household | Production team | Class status (1)         | Basic work points (2) | Total labor forces (3) | Male labor forces (4) | Female labor forces (5) | Total household population (6) | Age: 1 to 3 years old (7) | Age: 4 to 7 years old (8) | Age: 8 years old and above (9) | Work points of grain distribution (10) | Laboring work points (11) | Farmyard manure work points (12) | Total work points (13) | Work points of compulsory labor (14) | Work points of help cultivation (15) | Work points of private plots labor (16) | Total deducted work points (17) | Acutal workdays of participation in distribution (18) | Workpoints for rations distribution (19) | Rations per workpoint (20) | Total rations received form distribution (21) | Workdays of participation in distribu-tion (22) | Grains per workpoint (23) | Total grains distributed by work-points (24) | Grains subsidy (25) | Total Grains received from distribution (26) | Distributed grains per person (27) | Distributed grains per adult (28) | Grains received from privated plots (29) | Workdays of participation in distribution (30) | Value per workpoint (31) | Total value of workpoints (32) | Money used for investment (33) | Sum of income (34) | Money distributed in this year (34) | Deposit/ debt of this year (35) | Deposit/ debt over the years (36) | Accumulated deposit/debt (37) |
|------------------|------|-----------------------------------|-----------------|--------------------------|-----------------------|------------------------|-----------------------|-------------------------|--------------------------------|---------------------------|---------------------------|--------------------------------|----------------------------------------|---------------------------|----------------------------------|------------------------|--------------------------------------|--------------------------------------|-----------------------------------------|---------------------------------|-------------------------------------------------------|------------------------------------------|----------------------------|-----------------------------------------------|-------------------------------------------------|---------------------------|----------------------------------------------|---------------------|----------------------------------------------|------------------------------------|-----------------------------------|------------------------------------------|------------------------------------------------|--------------------------|--------------------------------|--------------------------------|--------------------|-------------------------------------|---------------------------------|-----------------------------------|-------------------------------|
| 296              | 1976 | Wang Jiantang                     | 2               | poor peasant             | 6.5                   | 0                      |                       |                         | 3                              |                           |                           |                                | 30                                     |                           |                                  | 291                    |                                      |                                      |                                         | 16                              |                                                       | 30                                       | 39.4                       | 1182                                          | 275                                             | 0.58                      | 160                                          | 1341.5              | 447.1666667                                  | 177                                | 275                               | 0.8                                      | 220.00                                         | 25.35                    | 234.94                         | 10.41                          | -25.35             | -14.94                              |                                 |                                   |                               |
| 297              | 1976 | Wu Jinxing                        | 2               |                          |                       | 0                      |                       |                         |                                |                           |                           |                                |                                        |                           |                                  |                        |                                      |                                      |                                         |                                 | 0                                                     | 39.4                                     | 0                          | 0                                             | 0.58                                            | 0                         | 0                                            | #DIV/0!             | 0                                            | 0                                  | 0.8                               | 0.00                                     |                                                |                          | 0.00                           |                                | 0.00               |                                     |                                 |                                   |                               |
| 298              | 1976 | Li Jiaji                          | 1               |                          |                       | 0                      |                       |                         |                                |                           |                           |                                |                                        |                           |                                  |                        |                                      |                                      |                                         |                                 | 0                                                     | 39.4                                     | 0                          | 0                                             | 0.65                                            | 0                         | 0                                            | #DIV/0!             | 0                                            | 0                                  | 0.82                              | 0.00                                     |                                                |                          | 0.00                           |                                | 0.00               |                                     |                                 |                                   |                               |
| 299              | 1976 | Liu Wuyi                          | 1               |                          |                       | 14                     | 2                     | 1                       | 1                              | 5                         |                           |                                |                                        | 44                        |                                  |                        | 566                                  |                                      |                                         |                                 | 35                                                    |                                          | 44                         | 39.4                                          | 1733.6                                          | 531                       | 0.65                                         | 345                 | 2078.75                                      | 415                                | 236                               | 531                                      | 0.82                                           | 435.42                   | 96                             | 497.83                         | 33.59              | 46.96                               | 80.55                           |                                   |                               |
| 300              | 1976 | Hou Donglai                       | 1               | poor peasant             | 4                     | 0                      |                       |                         | 1                              |                           |                           |                                | 10                                     |                           |                                  | 42                     |                                      |                                      |                                         | 10                              |                                                       | 10                                       | 39.4                       | 394                                           | 32                                              | 0.65                      | 21                                           | 414.8               | 414.8                                        | 59                                 | 32                                | 0.82                                     | 26.24                                          |                          | 77.78                          | -51.54                         |                    | -51.54                              |                                 |                                   |                               |
| 301              | 1976 | Liang Shuxiang                    | 1               | poor peasant             | 4                     | 1                      | 0                     | 1                       | 2                              |                           |                           |                                | 20                                     |                           |                                  | 271                    |                                      |                                      |                                         | 10                              |                                                       | 20                                       | 39.4                       | 788                                           | 261                                             | 0.65                      | 170                                          | 957.65              | 478.825                                      | 118                                | 261                               | 0.82                                     | 214.02                                         |                          | 206.83                         | 7.19                           | 222.29             | 229.48                              |                                 |                                   |                               |
| 302              | 1976 | Jia Hongyun                       | 1               | low-middle-class peasant |                       | 0                      |                       |                         | 1                              |                           |                           |                                | 10                                     |                           |                                  |                        |                                      |                                      |                                         |                                 | 10                                                    | 39.4                                     | 394                        | 0                                             | 0.65                                            | 0                         | 394                                          | 394                 | 394                                          | 118                                | 0                                 | 0.82                                     | 0.00                                           | 45                       | 69.41                          | -24.41                         | -5.51              | -29.92                              |                                 |                                   |                               |
| 303              | 1976 | Cui Yizhi                         | 1               | poor peasant             |                       | 0                      |                       |                         |                                |                           |                           |                                |                                        |                           |                                  |                        |                                      |                                      |                                         |                                 | 0                                                     | 39.4                                     | 0                          | 0                                             | 0.65                                            | 0                         | 0                                            | #DIV/0!             | 0                                            | 0                                  | 0.82                              | 0.00                                     |                                                |                          | 0.00                           |                                | 0.00               |                                     |                                 |                                   |                               |
| 304              | 1976 | Shen Shangeng                     | 1               | poor peasant             | 4                     | 1                      | 0                     | 1                       | 6                              |                           |                           |                                | 58                                     |                           |                                  | 499                    |                                      |                                      |                                         | 10                              |                                                       | 58                                       | 39.4                       | 2285.2                                        | 489                                             | 0.65                      | 318                                          | 2603.05             | 433.8416667                                  | 354                                | 489                               | 0.82                                     | 400.98                                         |                          | 425.95                         | -24.97                         | 117.12             | 92.15                               |                                 |                                   |                               |
| 305              | 1976 | Wu Jianyao                        | 1               | poor peasant             | 14                    | 0                      |                       |                         | 3                              |                           |                           |                                | 26                                     |                           |                                  | 526                    |                                      |                                      |                                         | 35                              |                                                       | 26                                       | 39.4                       | 1024.4                                        | 491                                             | 0.65                      | 319                                          | 1343.55             | 447.85                                       | 59                                 | 491                               | 0.82                                     | 402.62                                         |                          | 536.7                          | -134.08                        | 244.93             | 110.85                              |                                 |                                   |                               |
| 306              | 1976 | Lan Weizhi                        | 1               | poor peasant             | 19                    | 0                      |                       |                         | 8                              |                           |                           |                                | 76                                     |                           |                                  | 1064                   |                                      |                                      |                                         | 48                              |                                                       | 76                                       | 39.4                       | 2994.4                                        | 1016                                            | 0.65                      | 660                                          | 3654.8              | 456.85                                       | 413                                | 1016                              | 0.82                                     | 833.12                                         |                          | 741.29                         | 91.83                          | 450.59             | 542.42                              |                                 |                                   |                               |
| 307              | 1976 | Gui Baogeng                       | 1               | poor peasant             | 14                    | 2                      | 1                     | 1                       | 3                              |                           |                           |                                | 26                                     |                           |                                  | 279                    |                                      |                                      |                                         | 35                              |                                                       | 26                                       | 39.4                       | 1024.4                                        | 244                                             | 0.65                      | 159                                          | 1183                | 394.3333333                                  | 59                                 | 244                               | 0.82                                     | 200.08                                         |                          | 194.16                         | 5.92                           |                    | 5.92                                |                                 |                                   |                               |
| 308              | 1976 | Fan Shumao                        | 1               |                          | 14                    | 2                      | 1                     | 1                       | 3                              |                           |                           |                                | 26                                     |                           |                                  | 433                    |                                      |                                      |                                         | 35                              |                                                       | 26                                       | 39.4                       | 1024.4                                        | 398                                             | 0.65                      | 259                                          | 1283.1              | 427.7                                        | 56                                 | 398                               | 0.82                                     | 326.36                                         |                          | 199.6                          | 126.76                         |                    | 126.76                              |                                 |                                   |                               |
| 309              | 1976 | Wang Bangseng                     | 2               |                          | 14                    | 2                      | 1                     | 1                       | 3                              |                           |                           |                                | 26                                     |                           |                                  | 338                    |                                      |                                      |                                         | 35                              |                                                       | 26                                       | 39.4                       | 1024.4                                        | 303                                             | 0.58                      | 176                                          | 1107.4              | 369.1333333                                  | 118                                | 303                               | 0.8                                      | 242.40                                         |                          | 200.07                         | 42.33                          | 78.56              | 120.89                              |                                 |                                   |                               |
| 310              | 1976 | Lan Aize                          | 2               |                          |                       | 0                      |                       |                         | 1                              |                           |                           |                                | 10                                     |                           |                                  |                        |                                      |                                      |                                         | 10                              |                                                       | 39.4                                     | 394                        | 0                                             | 0.58                                            | 0                         | 394                                          | 394                 | 394                                          | 118                                | 0                                 | 0.8                                      | 0.00                                           |                          | 114.6                          | -114.60                        | -1119.14           | -1233.74                            |                                 |                                   |                               |
| 311              | 1976 | Wu Jingyi                         | 2               |                          | 22                    | 3                      | 2                     | 1                       | 6                              |                           |                           |                                | 56                                     |                           |                                  | 671                    |                                      |                                      |                                         | 55                              |                                                       | 56                                       | 39.4                       | 2206.4                                        | 616                                             | 0.58                      | 357                                          | 2563.68             | 427.28                                       | 295                                | 616                               | 0.8                                      | 492.80                                         |                          | 505.04                         | -12.24                         | -258.07            | -270.31                             |                                 |                                   |                               |
| 312              | 1976 | An Xiangqin                       | 2               |                          | 2.5                   | 0                      |                       |                         | 1                              |                           |                           |                                | 10                                     |                           |                                  | 142                    |                                      |                                      |                                         | 6                               |                                                       | 10                                       | 39.4                       | 394                                           | 136                                             | 0.58                      | 79                                           | 472.88              | 472.88                                       | 118                                | 136                               | 0.8                                      | 108.80                                         | 100                      | 145.38                         | 63.42                          | 194.76             | 258.18                              |                                 |                                   |                               |
| 313              | 1976 | Meng Qingtang                     | 2               |                          |                       | 0                      |                       |                         | 1                              |                           |                           |                                | 10                                     |                           |                                  | 272                    |                                      |                                      |                                         |                                 |                                                       | 10                                       | 39.4                       | 394                                           | 272                                             | 0.58                      | 158                                          | 551.76              | 551.76                                       | 59                                 | 272                               | 0.8                                      | 217.60                                         |                          | 218.28                         | -0.68                          | 740.9              | 740.22                              |                                 |                                   |                               |
| 314              | 1976 | Zhang Liseng                      | 2               |                          | 14                    | 2                      | 1                     | 1                       | 2                              |                           |                           |                                | 20                                     |                           |                                  | 667                    |                                      |                                      |                                         | 35                              |                                                       | 20                                       | 39.4                       | 788                                           | 632                                             | 0.58                      | 367                                          | 1154.56             | 577.28                                       | 59                                 | 632                               | 0.8                                      | 505.60                                         |                          | 292.8                          | 212.80                         |                    | 212.80                              |                                 |                                   |                               |
| 315              | 1976 | Zhang Jiaqing                     | 2               |                          |                       |                        |                       |                         |                                |                           |                           |                                |                                        |                           |                                  |                        |                                      |                                      |                                         |                                 |                                                       |                                          |                            |                                               |                                                 |                           |                                              |                     |                                              |                                    |                                   |                                          |                                                |                          |                                |                                |                    |                                     |                                 |                                   |                               |
| 317              | 1976 | Meng Xianshan                     | 2               |                          | 4                     | 0                      |                       |                         | 4                              |                           |                           |                                | 34                                     |                           |                                  | 324                    |                                      |                                      |                                         | 10                              |                                                       | 34                                       | 39.4                       | 1246.6                                        | 314                                             | 0.58                      | 182                                          | 1428.72             | 357.18                                       | 118                                | 314                               | 0.8                                      | 251.20                                         | 10                       | 226.69                         | 34.51                          | 142.39             | 176.90                              |                                 |                                   |                               |
| 318              | 1976 | Gao Yongcai                       | 2               | poor peasant             |                       | 0                      |                       |                         |                                |                           |                           |                                |                                        |                           |                                  |                        |                                      |                                      |                                         |                                 | 0                                                     | 39.4                                     | 0                          | 0                                             | 0.58                                            | 0                         | 0                                            | #DIV/0!             | 0                                            | 0                                  | 0.8                               | 0.00                                     |                                                |                          | 0.00                           |                                | 0.00               |                                     |                                 |                                   |                               |
| 319              | 1976 | Meng Mingying                     | 2               | poor peasant             |                       | 0                      |                       |                         | 1                              |                           |                           |                                | 10                                     |                           |                                  | 384                    |                                      |                                      |                                         |                                 |                                                       | 10                                       | 39.4                       | 394                                           | 384                                             | 0.58                      | 223                                          | 616.72              | 616.72                                       | 59                                 | 384                               | 0.8                                      | 307.20                                         |                          | 292.59                         | 14.61                          | 707.99             | 722.60                              |                                 |                                   |                               |
| 320              | 1976 | Liu Ping                          | 2               | low-middle-class peasant | 14                    | 2                      | 1                     | 1                       | 3                              |                           |                           |                                | 26                                     |                           |                                  | 454                    |                                      |                                      |                                         | 35                              |                                                       | 26                                       | 39.4                       | 1024.4                                        | 419                                             | 0.58                      | 243                                          | 1267.42             | 422.4733333                                  | 59                                 | 419                               | 0.8                                      | 335.20                                         |                          | 349.56                         | -14.36                         |                    | -14.36                              |                                 |                                   |                               |
| 1                | 1977 | Meng Tianyun                      | 1               | poor peasant             | 6.5                   | 2                      | 0                     | 2                       | 7                              |                           |                           |                                | 68                                     |                           |                                  | 733                    | 68                                   |                                      |                                         | 16                              |                                                       | 68                                       | 35.4                       | 2407                                          | 717                                             | 0.80                      | 574                                          | 2980.8              | 425.8285714                                  | 399                                | 717                               | 0.83                                     | 595.11                                         |                          | 623.93                         | -28.82                         | 70.91              | 42.09                               |                                 |                                   |                               |
| 2                | 1977 | Yang Fengming                     | 1               | middle-class peasant     | 2.5                   | 1                      | 0                     | 1                       | 2                              |                           |                           |                                | 20                                     |                           |                                  | 301                    | 20                                   |                                      |                                         | 6                               |                                                       | 20                                       | 35.4                       | 708                                           | 295                                             | 0.72                      | 212                                          |                     |                                              |                                    | 114                               | 295                                      | 0.77                                           | 227.15                   |                                | 249.58                         | -22.43             | 131.36                              | 108.93                          |                                   |                               |
| 3                | 1977 | Li Chengxin                       | 1               | poor peasant             | 22                    | 3                      | 2                     | 1                       | 6                              |                           |                           |                                | 60                                     |                           |                                  | 803                    | 60                                   |                                      |                                         | 55                              |                                                       | 60                                       | 35.4                       | 2124                                          | 748                                             | 0.72                      | 539                                          | 2662.56             | 443.76                                       | 342                                | 748                               | 0.77                                     | 575.96                                         |                          | 673.30                         | -97.34                         | 106.38             | 9.04                                |                                 |                                   |                               |
| 4                | 1977 | Li Zeying                         | 1               | poor peasant             |                       | 0                      |                       |                         |                                |                           |                           |                                |                                        |                           |                                  |                        |                                      |                                      |                                         |                                 | 0                                                     | 35.4                                     | 0                          | 0                                             | 0.72                                            | 0                         | 0                                            | #DIV/0!             | 0                                            | 0                                  | 0.77                              | 0.00                                     |                                                |                          | 0.00                           |                                | 0.00               |                                     |                                 |                                   |                               |
| 5                | 1977 | Gao Peizhong                      | 1               | poor peasant             | 25                    | 4                      | 2                     | 2                       | 8                              |                           |                           |                                | 78                                     |                           |                                  | 907                    | 78                                   |                                      |                                         | 63                              |                                                       | 78                                       | 35.4                       | 2761                                          | 844                                             | 0.72                      | 608                                          | 3368.88             | 421.11                                       | 456                                | 844                               | 0.77                                     | 649.88                                         |                          | 742.96                         | -93.08                         | -1253.73           | -1346.81                            |                                 |                                   |                               |

(cont.)

| Household number | Year | Name of the head of the household | Production team | Class status (1)         | Basic work points (2) | Total labor forces (3) | Male labor forces (4) | Female labor forces (5) | Total household population (6) | Age: 1 to 3 years old (7) | Age: 4 to 7 years old (8) | Age: 8 years old and above (9) | Work points of grain distribution (10) | Laboring work points (11) | Farmyard manure work points (12) | Total work points (13) | Work points of compulsory labor (14) | Work points of help cultivation (15) | Work points of private plots labor (16) | Total deducted work points (17) | Acutal workdays of participation in distribution (18) | Workpoints for rations distribution (19) | Rations per workpoint (20) | Total rations received form distribution (21) | Workdays of participation in distribu-tion (22) | Grains per workpoint (23) | Total grains distributed by work-points (24) | Grains subsidy (25) | Total Grains received from distribution (26) | Distributed grains per person (27) | Distributed grains per adult (28) | Grains received from privated plots (29) | Workdays of participation in distribution (30) | Value per workpoint (31) | Total value of workpoints (32) | Money used for investment (33) | Sum of income (34) | Money distributed in this year (34) | Deposit/ debt of this year (35) | Deposit/ debt over the years (36) | Accumulated deposit/debt (37) |
|------------------|------|-----------------------------------|-----------------|--------------------------|-----------------------|------------------------|-----------------------|-------------------------|--------------------------------|---------------------------|---------------------------|--------------------------------|----------------------------------------|---------------------------|----------------------------------|------------------------|--------------------------------------|--------------------------------------|-----------------------------------------|---------------------------------|-------------------------------------------------------|------------------------------------------|----------------------------|-----------------------------------------------|-------------------------------------------------|---------------------------|----------------------------------------------|---------------------|----------------------------------------------|------------------------------------|-----------------------------------|------------------------------------------|------------------------------------------------|--------------------------|--------------------------------|--------------------------------|--------------------|-------------------------------------|---------------------------------|-----------------------------------|-------------------------------|
| 6                | 1977 | Kong Qingquan                     | 1               | poor peasant             |                       | 0                      |                       |                         |                                |                           |                           |                                |                                        |                           |                                  |                        | 0                                    |                                      |                                         |                                 | 0                                                     | 35.4                                     | 0                          | 0                                             | 0.72                                            | 0                         | 0                                            | #DIV/o!             |                                              | 0                                  | 0                                 | 0.77                                     | 0.00                                           |                          |                                |                                | 0.00               |                                     | 0.00                            |                                   |                               |
| 7                | 1977 | Li Chengren                       | 1               | middle-class peasant     |                       | 0                      |                       |                         | 2                              |                           |                           |                                | 20                                     |                           |                                  |                        | 11                                   | 20                                   |                                         |                                 | 20                                                    | 35.4                                     | 708                        | 11                                            | 0.72                                            | 8                         | 715.92                                       | 357.96              |                                              | 114                                | 11                                | 0.77                                     | 8.47                                           | 100                      |                                | 147.28                         | -38.81             | -360.97                             | -399.78                         |                                   |                               |
| 8                | 1977 | Wu Jixiang                        | 1               | middle-class peasant     |                       | 0                      |                       |                         |                                |                           |                           |                                |                                        |                           |                                  |                        | 0                                    |                                      |                                         |                                 | 0                                                     | 35.4                                     | 0                          | 0                                             | 0.72                                            | 0                         | 0                                            | #DIV/o!             |                                              | 0                                  | 0                                 | 0.77                                     | 0.00                                           |                          |                                |                                | 0.00               |                                     | 0.00                            |                                   |                               |
| 9                | 1977 | Kong Fangyu                       | 1               | poor peasant             | 4                     | 1                      | 0                     | 1                       | 3                              |                           |                           |                                | 26                                     |                           |                                  |                        | 90                                   | 26                                   |                                         | 10                              | 26                                                    | 35.4                                     | 920                        | 80                                            | 0.72                                            | 58                        | 978                                          | 326                 |                                              | 171                                | 80                                | 0.77                                     | 61.60                                          |                          |                                | 179.41                         | -117.81            | 212.66                              | 94.85                           |                                   |                               |
| 10               | 1977 | Gao Wei                           | 1               | poor peasant             | 4                     | 1                      | 0                     | 1                       | 3                              |                           |                           |                                | 30                                     |                           |                                  |                        | 70                                   | 30                                   |                                         | 10                              | 30                                                    | 35.4                                     | 1062                       | 60                                            | 0.72                                            | 43                        | 1105.2                                       | 368.4               |                                              | 171                                | 60                                | 0.77                                     | 46.20                                          |                          |                                | 296.21                         | -250.01            | 626.40                              | 376.39                          |                                   |                               |
| 11               | 1977 | Gao Jun                           | 1               | poor peasant             |                       | 0                      |                       |                         | 1                              |                           |                           |                                | 10                                     |                           |                                  |                        |                                      | 10                                   |                                         |                                 | 10                                                    | 35.4                                     | 354                        | 0                                             | 0.72                                            | 0                         | 354                                          | 354                 |                                              | 57                                 | 0                                 | 0.77                                     | 0.00                                           |                          |                                | 73.69                          | -73.69             | 28.07                               | -45.62                          |                                   |                               |
| 12               | 1977 | Gao Peixiao                       | 1               | poor peasant             | 14                    | 2                      | 1                     | 1                       | 6                              |                           |                           |                                | 58                                     |                           |                                  |                        | 657                                  | 58                                   |                                         | 35                              | 58                                                    | 35.4                                     | 2053                       | 622                                           | 0.72                                            | 448                       | 2501.04                                      | 416.84              |                                              | 342                                | 622                               | 0.77                                     | 478.94                                         | 25                       |                                | 707.72                         | -203.78            | 240.87                              | 37.09                           |                                   |                               |
| 13               | 1977 | Gao Shang                         | 1               | poor peasant             |                       | 0                      |                       |                         |                                |                           |                           |                                |                                        |                           |                                  |                        | 0                                    |                                      |                                         |                                 | 0                                                     | 35.4                                     | 0                          | 0                                             | 0.72                                            | 0                         | 0                                            | #DIV/o!             |                                              | 0                                  | 0                                 | 0.77                                     | 0.00                                           |                          |                                |                                | 0.00               |                                     | 0.00                            |                                   |                               |
| 14               | 1977 | Mu Zhaolin                        | 1               | poor peasant             | 14                    | 2                      | 1                     | 1                       | 5                              |                           |                           |                                | 44                                     |                           |                                  |                        | 607                                  | 44                                   |                                         | 35                              | 44                                                    | 35.4                                     | 1558                       | 572                                           | 0.72                                            | 412                       | 1969.44                                      | 393.888             |                                              | 285                                | 572                               | 0.77                                     | 440.44                                         |                          |                                | 552.94                         | -112.50            | 190.45                              | 77.95                           |                                   |                               |
| 15               | 1977 | Cao Cuizhen                       | 1               | poor peasant             | 12.5                  | 2                      | 1                     | 1                       | 5                              |                           |                           |                                | 50                                     |                           |                                  |                        | 615                                  | 50                                   |                                         | 31                              | 50                                                    | 35.4                                     | 1770                       | 584                                           | 0.80                                            | 467                       | 2237.2                                       | 447.44              |                                              | 285                                | 584                               | 0.83                                     | 484.72                                         |                          |                                | 695.45                         | -210.73            | 570.83                              | 360.10                          |                                   |                               |
| 16               | 1977 | Cao Jianren                       | 1               | poor peasant             | 14                    | 2                      | 1                     | 1                       | 6                              |                           |                           |                                | 60                                     |                           |                                  |                        | 750                                  | 60                                   |                                         | 35                              | 60                                                    | 35.4                                     | 2124                       | 715                                           | 0.72                                            | 515                       | 2638.8                                       | 439.8               |                                              | 342                                | 715                               | 0.77                                     | 550.55                                         | 30                       |                                | 723.70                         | -143.15            | 119.93                              | -23.22                          |                                   |                               |
| 17               | 1977 | Liu Guifu                         | 1               | poor peasant             |                       | 0                      |                       |                         |                                |                           |                           |                                |                                        |                           |                                  |                        | 0                                    |                                      |                                         |                                 | 0                                                     | 35.4                                     | 0                          | 0                                             | 0.72                                            | 0                         | 0                                            | #DIV/o!             |                                              | 0                                  | 0                                 | 0.77                                     | 0.00                                           |                          |                                |                                | 0.00               |                                     | 0.00                            |                                   |                               |
| 18               | 1977 | Meng Mingde                       | 1               | poor peasant             |                       | 1                      | 0                     | 1                       | 5                              |                           |                           |                                | 50                                     |                           |                                  |                        | 470                                  | 50                                   |                                         |                                 | 50                                                    | 35.4                                     | 1770                       | 470                                           | 0.72                                            | 338                       | 2108.4                                       | 421.68              |                                              | 342                                | 470                               | 0.77                                     | 361.90                                         |                          |                                | 536.68                         | -174.78            | 851.47                              | 676.69                          |                                   |                               |
| 19               | 1977 | Mu Shouliang                      | 1               | poor peasant             |                       | 0                      |                       |                         | 2                              |                           |                           |                                | 20                                     |                           |                                  |                        | 17                                   | 20                                   |                                         |                                 | 20                                                    | 35.4                                     | 708                        | 17                                            | 0.72                                            | 12                        | 720.24                                       | 360.12              |                                              | 114                                | 17                                | 0.77                                     | 13.09                                          |                          |                                | 163.05                         | -149.96            | -653.04                             | -803.00                         |                                   |                               |
| 20               | 1977 | Meng Mingbao                      | 1               | poor peasant             | 20.5                  | 3                      | 2                     | 1                       | 3                              |                           |                           |                                | 30                                     |                           |                                  |                        | 570                                  | 30                                   |                                         | 51                              | 30                                                    | 35.4                                     | 1062                       | 519                                           | 0.72                                            | 374                       | 1435.68                                      | 478.56              |                                              | 171                                | 519                               | 0.77                                     | 399.63                                         |                          |                                | 572.16                         | -172.53            | 843.15                              | 670.62                          |                                   |                               |
| 21               | 1977 | Meng Mingjin                      | 2               | poor peasant             |                       | 0                      |                       |                         | 1                              |                           |                           |                                | 10                                     |                           |                                  |                        | 197                                  | 10                                   |                                         |                                 | 10                                                    | 35.4                                     | 354                        | 197                                           | 0.80                                            | 158                       | 511.6                                        | 511.6               |                                              | 57                                 | 197                               | 0.83                                     | 163.51                                         |                          |                                | 171.53                         | -8.02              | -233.34                             | -241.36                         |                                   |                               |
| 22               | 1977 | Liang Shiren                      | 1               | low-middle-class peasant |                       | 0                      |                       |                         |                                |                           |                           |                                |                                        |                           |                                  |                        | 0                                    |                                      |                                         |                                 | 0                                                     | 35.4                                     | 0                          | 0                                             | 0.72                                            | 0                         | 0                                            | #DIV/o!             |                                              | 0                                  | 0                                 | 0.77                                     | 0.00                                           |                          |                                |                                | 0.00               |                                     | 0.00                            |                                   |                               |
| 23               | 1977 | Liang Yingfu                      | 1               | low-middle-class peasant | 20                    | 2                      | 2                     | 0                       | 4                              |                           |                           |                                | 40                                     |                           |                                  |                        | 960                                  | 40                                   |                                         | 50                              | 40                                                    | 35.4                                     | 1416                       | 910                                           | 0.72                                            | 655                       | 2071.2                                       | 517.8               |                                              | 228                                | 910                               | 0.77                                     | 700.70                                         |                          |                                | 608.66                         | 92.04              | 329.21                              | 421.25                          |                                   |                               |
| 24               | 1977 | Lei Guangzhi                      | 1               | low-middle-class peasant | 18                    | 2                      | 2                     | 0                       | 2                              |                           |                           |                                | 20                                     |                           |                                  |                        | 640                                  | 20                                   |                                         | 45                              | 20                                                    | 35.4                                     | 708                        | 595                                           | 0.72                                            | 428                       | 1136.4                                       | 568.2               |                                              | 114                                | 595                               | 0.77                                     | 458.15                                         |                          |                                | 329.56                         | 128.59             | -80.52                              | 48.07                           |                                   |                               |
| 25               | 1977 | Fan Lishi                         | 1               | middle-class peasant     | 24.5                  | 4                      | 2                     | 2                       | 6                              |                           |                           |                                | 60                                     |                           |                                  |                        | 1361                                 | 60                                   |                                         | 61                              | 60                                                    | 35.4                                     | 2124                       | 1300                                          | 0.72                                            | 936                       | 3060                                         | 510                 |                                              | 342                                | 1300                              | 0.77                                     | 1001.00                                        |                          |                                | 819.99                         | 181.01             | 1186.42                             | 1367.43                         |                                   |                               |
| 26               | 1977 | Zhang Quangui                     | 1               | middle-class peasant     |                       | 0                      |                       |                         | 1                              |                           |                           |                                | 10                                     |                           |                                  |                        |                                      | 10                                   |                                         |                                 | 10                                                    | 35.4                                     | 354                        | 0                                             | 0.72                                            | 0                         | 354                                          | 354                 |                                              | 57                                 | 0                                 | 0.77                                     | 0.00                                           | 78.79                    |                                |                                | 73.58              | 5.21                                | -78.79                          | -73.58                            |                               |
| 27               | 1977 | Wang Bangjie                      | 1               | low-middle-class peasant | 14                    | 2                      | 1                     | 1                       | 4                              |                           |                           |                                | 38                                     |                           |                                  |                        | 634                                  | 38                                   |                                         | 35                              | 38                                                    | 35.4                                     | 1345                       | 599                                           | 0.72                                            | 431                       | 1776.48                                      | 444.12              |                                              | 228                                | 599                               | 0.77                                     | 461.23                                         |                          |                                | 448.05                         | 13.18              | 236.07                              | 249.25                          |                                   |                               |
| 28               | 1977 | Meng Tianxing                     | 1               | low-middle-class peasant | 14                    | 2                      | 1                     | 1                       | 7                              |                           |                           |                                | 68                                     |                           |                                  |                        | 554                                  | 68                                   |                                         | 35                              | 68                                                    | 35.4                                     | 2407                       | 519                                           | 0.72                                            | 374                       | 2780.88                                      | 397.2685714         |                                              | 399                                | 519                               | 0.77                                     | 399.63                                         |                          |                                | 569.19                         | -169.56            | -176.52                             | -346.08                         |                                   |                               |

(cont.)

| Household number | Year | Name of the head of the household | Production team | Class status (1)           | Basic work points (2) | Total labor forces (3) | Male labor forces (4) | Female labor forces (5) | Total household population (6) | Age: 1 to 3 years old (7) | Age: 4 to 7 years old (8) | Age: 8 years old and above (9) | Work points of grain distribution (10) | Laboring work points (11) | Farmyard manure work points (12) | Total work points (13) | Work points of compulsory labor (14) | Work points of help cultivation (15) | Work points of private plots labor (16) | Total deducted work points (17) | Acutal workdays of participation in distribution (18) | Workpoints for rations distribution (19) | Rations per workpoint (20) | Total rations received form distribution (21) | Workdays of participation in distribu- tion (22) | Grains per workpoint (23) | Total grains distributed by work- points (24) | Grains subsidy (25) | Total Grains received from distribution (26) | Distributed grains per person (27) | Distributed grains per adult (28) | Grains received from privated plots (29) | Workdays of participation in distribution (30) | Value per workpoint (31) | Total value of workpoints (32) | Money used for investment (33) | Sum of income | Money distributed in this year (34) | Deposit/ debt of this year (35) | Deposit/ debt over the years (36) | Accumulated deposit/debt (37) |
|------------------|------|-----------------------------------|-----------------|----------------------------|-----------------------|------------------------|-----------------------|-------------------------|--------------------------------|---------------------------|---------------------------|--------------------------------|----------------------------------------|---------------------------|----------------------------------|------------------------|--------------------------------------|--------------------------------------|-----------------------------------------|---------------------------------|-------------------------------------------------------|------------------------------------------|----------------------------|-----------------------------------------------|--------------------------------------------------|---------------------------|-----------------------------------------------|---------------------|----------------------------------------------|------------------------------------|-----------------------------------|------------------------------------------|------------------------------------------------|--------------------------|--------------------------------|--------------------------------|---------------|-------------------------------------|---------------------------------|-----------------------------------|-------------------------------|
| 29               | 1977 | Xue Baolin                        | 1               | low-middle-class peasant   | 4                     | 1                      | 0                     | 1                       | 5                              |                           |                           |                                | 50                                     |                           |                                  | 244                    | 50                                   |                                      | 10                                      |                                 | 50                                                    | 35.4                                     | 1770                       | 234                                           | 0.72                                             | 168                       |                                               | 1938.48             | 387.696                                      |                                    | 285                               | 234                                      | 0.77                                           | 180.18                   | 120.95                         |                                | 331.98        | -30.85                              | 48.21                           | 17.36                             |                               |
| 30               | 1977 | Cao Cuiheng                       | 1               | low-middle-class peasant   |                       | 0                      |                       |                         | 2                              |                           |                           |                                | 20                                     |                           |                                  | 245                    | 20                                   |                                      |                                         |                                 | 20                                                    | 35.4                                     | 708                        | 245                                           | 0.72                                             | 176                       |                                               | 884.4               | 442.2                                        |                                    | 114                               | 245                                      | 0.77                                           | 188.65                   |                                |                                | 212.83        | -24.18                              | 295.91                          | 271.73                            |                               |
| 31               | 1977 | Ma Hongxiang                      | 1               | low-middle-class peasant   | 4                     | 1                      | 0                     | 1                       | 4                              |                           |                           |                                | 34                                     |                           |                                  | 26                     | 34                                   |                                      | 10                                      |                                 | 34                                                    | 35.4                                     | 1204                       | 16                                            | 0.72                                             | 12                        |                                               | 1215.12             | 303.78                                       |                                    | 228                               | 16                                       | 0.77                                           | 12.32                    | 110                            |                                | 213.94        | -91.62                              | -70.33                          | -161.95                           |                               |
| 32               | 1977 | Ruan Baorong                      | 1               | low-middle-class peasant   | 10                    | 3                      | 2                     | 1                       | 4                              |                           |                           |                                | 40                                     |                           |                                  | 555                    | 40                                   |                                      | 25                                      |                                 | 40                                                    | 35.4                                     | 1416                       | 530                                           | 0.72                                             | 382                       |                                               | 1797.6              | 449.4                                        |                                    | 285                               | 530                                      | 0.77                                           | 408.10                   |                                |                                | 1115.53       | -707.43                             | 1356.87                         | 649.44                            |                               |
| 33               | 1977 | Cao Jianguo                       | 1               | low-middle-class peasant   | 14                    | 2                      | 1                     | 1                       | 8                              |                           |                           |                                | 78                                     |                           |                                  | 573                    | 78                                   |                                      | 35                                      |                                 | 78                                                    | 35.4                                     | 2761                       | 538                                           | 0.72                                             | 387                       |                                               | 3148.56             | 393.57                                       |                                    | 456                               | 538                                      | 0.77                                           | 414.26                   |                                |                                | 667.60        | -253.34                             | -412.05                         | -665.39                           |                               |
| 34               | 1977 | Liu Jinliang                      | 1               | poor peasant               | 6.5                   | 2                      | 0                     | 2                       | 5                              |                           |                           |                                | 50                                     |                           |                                  | 566                    | 50                                   |                                      | 16                                      |                                 | 50                                                    | 35.4                                     | 1770                       | 550                                           | 0.72                                             | 396                       |                                               | 2166                | 433.2                                        |                                    | 285                               | 550                                      | 0.77                                           | 423.50                   |                                |                                | 492.11        | -68.61                              | 384.25                          | 315.64                            |                               |
| 35               | 1977 | Shi Baoshou                       | 1               | low-middle-class peasant   | 18.5                  | 4                      | 1                     | 3                       | 8                              |                           |                           |                                | 78                                     |                           |                                  | 1097                   | 78                                   |                                      | 46                                      |                                 | 78                                                    | 35.4                                     | 2761                       | 1051                                          | 0.72                                             | 757                       |                                               | 3517.92             | 439.74                                       |                                    | 456                               | 1051                                     | 0.77                                           | 809.27                   |                                |                                | 772.09        | 37.18                               | -851.28                         | -814.10                           |                               |
| 36               | 1977 | Wang Qiding                       | 2               | low-middle-class peasant   |                       | 0                      |                       |                         |                                |                           |                           |                                |                                        |                           |                                  |                        | 0                                    |                                      |                                         | 0                               |                                                       | 35.4                                     | 0                          | 0                                             | 0.80                                             | 0                         |                                               | 0                   | #DIV/0!                                      |                                    | 0                                 | 0                                        | 0.83                                           | 0.00                     |                                |                                | 0.00          |                                     | 0.00                            |                                   |                               |
| 37               | 1977 | Yu Zhankui                        | 1               | poor peasant               | 12                    | 2                      | 1                     | 1                       | 5                              |                           |                           |                                | 48                                     |                           |                                  | 305                    | 48                                   |                                      | 30                                      |                                 | 48                                                    | 35.4                                     | 1699                       | 275                                           | 0.72                                             | 198                       |                                               | 1897.2              | 379.44                                       |                                    | 285                               | 275                                      | 0.77                                           | 211.75                   | 210                            |                                | 361.26        | 60.49                               | -150.49                         | -90.00                            |                               |
| 38               | 1977 | Liu Yucan                         | 1               | poor peasant               | 4                     | 2                      | 1                     | 1                       | 7                              |                           |                           |                                | 64                                     |                           |                                  | 520                    | 64                                   |                                      | 10                                      |                                 | 64                                                    | 35.4                                     | 2266                       | 510                                           | 0.72                                             | 367                       |                                               | 2632.8              | 376.1142857                                  |                                    | 399                               | 510                                      | 0.77                                           | 392.70                   |                                |                                | 766.03        | -373.33                             | -644.92                         | -1018.25                          |                               |
| 39               | 1977 | Liu Guiting                       | 1               | middle-class peasant       |                       | 0                      |                       |                         | 3                              |                           |                           |                                | 30                                     |                           |                                  | 525                    | 30                                   |                                      | 30                                      |                                 | 30                                                    | 35.4                                     | 1062                       | 525                                           | 0.72                                             | 378                       |                                               | 1440                | 480                                          |                                    | 171                               | 525                                      | 0.77                                           | 404.25                   |                                |                                | 489.49        | -85.24                              | 334.54                          | 249.30                            |                               |
| 40               | 1977 | Liu Chengze                       | 1               | middle-class peasant       |                       | 0                      |                       |                         | 1                              |                           |                           |                                | 10                                     |                           |                                  | 148                    | 10                                   |                                      | 10                                      |                                 | 10                                                    | 35.4                                     | 354                        | 148                                           | 0.72                                             | 107                       |                                               | 460.56              | 460.56                                       |                                    | 57                                | 148                                      | 0.77                                           | 113.96                   |                                |                                | 131.37        | -17.41                              | 105.27                          | 87.86                             |                               |
| 41               | 1977 | Li Jinhu                          | 1               | middle-class peasant       |                       | 0                      |                       |                         |                                |                           |                           |                                |                                        |                           |                                  |                        | 0                                    |                                      |                                         | 0                               |                                                       | 35.4                                     | 0                          | 0                                             | 0.72                                             | 0                         |                                               | 0                   | #DIV/0!                                      |                                    | 0                                 | 0                                        | 0.77                                           | 0.00                     |                                |                                | 0.00          |                                     | 0.00                            |                                   |                               |
| 42               | 1977 | Meng Xiqing                       | 1               | poor peasant               | 24                    | 3                      | 2                     | 1                       | 7                              |                           |                           |                                | 70                                     |                           |                                  | 955                    | 70                                   |                                      | 60                                      |                                 | 70                                                    | 35.4                                     | 2478                       | 895                                           | 0.72                                             | 644                       |                                               | 3122.4              | 446.0571429                                  |                                    | 399                               | 895                                      | 0.77                                           | 689.15                   |                                |                                | 763.64        | -74.49                              | 448.13                          | 373.64                            |                               |
| 43               | 1977 | Li Shucheng                       | 1               | poor peasant               | 4                     | 3                      | 1                     | 2                       | 5                              |                           |                           |                                | 50                                     |                           |                                  | 919                    | 50                                   |                                      | 10                                      |                                 | 50                                                    | 35.4                                     | 1770                       | 909                                           | 0.72                                             | 654                       |                                               | 2424.48             | 484.896                                      |                                    | 342                               | 909                                      | 0.77                                           | 699.93                   |                                |                                | 696.51        | 3.42                                | 660.66                          | 664.08                            |                               |
| 44               | 1977 | Wang Guiying                      | 1               | low-middle-class peasant   |                       | 0                      |                       |                         |                                |                           |                           |                                |                                        |                           |                                  |                        | 0                                    |                                      |                                         | 0                               |                                                       | 35.4                                     | 0                          | 0                                             | 0.72                                             | 0                         |                                               | 0                   | #DIV/0!                                      |                                    | 0                                 | 0                                        | 0.77                                           | 0.00                     |                                |                                | 0.00          |                                     | 0.00                            |                                   |                               |
| 45               | 1977 | Zuo Yunxian                       | 1               | upper-middle-class peasant | 44.5                  | 7                      | 3                     | 4                       | 10                             |                           |                           |                                | 94                                     |                           |                                  | 1996                   | 94                                   |                                      | 111                                     |                                 | 94                                                    | 35.4                                     | 3294                       | 1885                                          | 0.72                                             | 1357                      |                                               | 4651.2              | 465.12                                       |                                    | 570                               | 1885                                     | 0.77                                           | 1451.45                  |                                |                                | 1379.33       | 72.12                               | 1966.57                         | 2038.69                           |                               |
| 46               | 1977 | Gao Peijie                        | 1               | poor peasant               | 10                    | 1                      | 1                     | 0                       | 2                              |                           |                           |                                | 20                                     |                           |                                  | 343                    | 20                                   |                                      | 25                                      |                                 | 20                                                    | 35.4                                     | 708                        | 318                                           | 0.72                                             | 229                       |                                               | 936.96              | 468.48                                       |                                    | 114                               | 318                                      | 0.77                                           | 244.86                   |                                |                                | 226.11        | 18.75                               | 162.36                          | 181.11                            |                               |
| 47               | 1977 | Wang Qisheng                      | 1               | poor peasant               | 12.5                  | 2                      | 1                     | 1                       | 6                              |                           |                           |                                | 58                                     |                           |                                  | 676                    | 58                                   |                                      | 31                                      |                                 | 58                                                    | 35.4                                     | 2053                       | 645                                           | 0.72                                             | 464                       |                                               | 2517.6              | 419.6                                        |                                    | 342                               | 645                                      | 0.77                                           | 496.65                   |                                |                                | 534.91        | -38.26                              | -732.52                         | -770.78                           |                               |
| 48               | 1977 | Chen Yuzhong                      | 2               | poor peasant               | 16                    | 3                      | 1                     | 2                       | 6                              |                           |                           |                                | 60                                     |                           |                                  | 834                    | 60                                   |                                      | 40                                      |                                 | 60                                                    | 35.4                                     | 2124                       | 794                                           | 0.80                                             | 635                       |                                               | 2759.2              | 459.8666667                                  |                                    | 342                               | 794                                      | 0.83                                           | 659.02                   |                                |                                | 623.84        | 35.18                               | 230.03                          | 265.21                            |                               |

(cont.)

| Household number | Year | Name of the head of the household | Production team | Class status (1)         | Basic work points (2) | Total labor forces (3) | Male labor forces (4) | Female labor forces (5) | Total household population (6) | Age: 1 to 3 years old (7) | Age: 4 to 7 years old (8) | Age: 8 years old and above (9) | Work points of grain distribution (10) | Laboring work points (11) | Farmyard manure work points (12) | Total work points (13) | Work points of compulsory labor (14) | Work points of help cultivation (15) | Work points of private plots labor (16) | Total deducted work points (17) | Acutal workdays of participation in distribution (18) | Workpoints for rations distribution (19) | Rations per workpoint (20) | Total rations received form distribution (21) | Workdays of participation in distribu-tion (22) | Grains per workpoint (23) | Total grains distributed by work-points (24) | Grains subsidy (25) | Total Grains received from distribution (26) | Distributed grains per person (27) | Distributed grains per adult (28) | Grains received from privated plots (29) | Workdays of participation in distribution (30) | Value per workpoint (31) | Total value of workpoints (32) | Money used for investment (33) | Sum of income (34) | Money distributed in this year (34) | Deposit/ debt of this year (35) | Deposit/ debt over the years (36) | Accumulated deposit/debt (37) |
|------------------|------|-----------------------------------|-----------------|--------------------------|-----------------------|------------------------|-----------------------|-------------------------|--------------------------------|---------------------------|---------------------------|--------------------------------|----------------------------------------|---------------------------|----------------------------------|------------------------|--------------------------------------|--------------------------------------|-----------------------------------------|---------------------------------|-------------------------------------------------------|------------------------------------------|----------------------------|-----------------------------------------------|-------------------------------------------------|---------------------------|----------------------------------------------|---------------------|----------------------------------------------|------------------------------------|-----------------------------------|------------------------------------------|------------------------------------------------|--------------------------|--------------------------------|--------------------------------|--------------------|-------------------------------------|---------------------------------|-----------------------------------|-------------------------------|
| 49               | 1977 | Meng Tianchang                    | 2               | poor peasant             | 14                    | 2                      | 1                     | 1                       | 6                              |                           |                           |                                | 58                                     |                           |                                  |                        | 480                                  | 58                                   |                                         | 35                              |                                                       | 58                                       | 35.4                       | 2053                                          | 445                                             | 0.80                      | 356                                          |                     | 2409.2                                       | 401.5333333                        |                                   | 342                                      | 445                                            | 0.83                     | 369.35                         |                                | 587.81             | -218.46                             | -337.48                         | -555.94                           |                               |
| 50               | 1977 | Wang Xizhi                        | 2               | middle-class peasant     | 2.5                   | 1                      | 0                     | 1                       | 4                              |                           |                           |                                | 40                                     |                           |                                  |                        | 500                                  | 40                                   |                                         | 6                               |                                                       | 40                                       | 35.4                       | 1416                                          | 494                                             | 0.80                      | 395                                          |                     | 1811.2                                       | 452.8                              |                                   | 228                                      | 494                                            | 0.83                     | 410.02                         |                                | 521.89             | -111.87                             | 121.10                          | 9.23                              |                               |
| 51               | 1977 | Jia Jinkui                        | 2               | low-middle-class peasant |                       | 0                      |                       |                         |                                |                           |                           |                                |                                        |                           |                                  |                        |                                      | 0                                    |                                         |                                 | 0                                                     | 35.4                                     | 0                          | 0                                             | 0.80                                            | 0                         |                                              | 0                   | #DIV/0!                                      |                                    | 0                                 | 0                                        | 0.83                                           | 0.00                     |                                |                                | 0.00               |                                     | 0.00                            |                                   |                               |
| 52               | 1977 | Ji Yunxian                        | 2               | poor peasant             | 8                     | 1                      | 1                     | 0                       | 1                              |                           |                           |                                | 10                                     |                           |                                  |                        | 269                                  | 10                                   |                                         | 20                              |                                                       | 10                                       | 35.4                       | 354                                           | 249                                             | 0.80                      | 199                                          |                     | 553.2                                        | 553.2                              |                                   | 57                                       | 249                                            | 0.83                     | 206.67                         |                                | 179.59             | 27.08                               | 467.35                          | 494.43                            |                               |
| 53               | 1977 | Zhang Yumei                       | 1               | poor peasant             |                       | 0                      |                       |                         |                                |                           |                           |                                |                                        |                           |                                  |                        |                                      | 0                                    |                                         |                                 | 0                                                     | 35.4                                     | 0                          | 0                                             | 0.72                                            | 0                         |                                              | 0                   | #DIV/0!                                      |                                    | 0                                 | 0                                        | 0.77                                           | 0.00                     |                                |                                | 0.00               |                                     | 0.00                            |                                   |                               |
| 54               | 1977 | Wang Jishi                        | 1               | middle-class peasant     | 14.5                  | 3                      | 1                     | 2                       | 3                              |                           |                           |                                | 30                                     |                           |                                  |                        | 654                                  | 30                                   |                                         | 36                              |                                                       | 30                                       | 35.4                       | 1062                                          | 618                                             | 0.72                      | 445                                          |                     | 1506.96                                      | 502.32                             |                                   | 171                                      | 618                                            | 0.77                     | 475.86                         |                                | 518.14             | -42.28                              | 1180.44                         | 1138.16                           |                               |
| 55               | 1977 | Mu Zhaosheng                      | 2               | middle-class peasant     | 14                    | 2                      | 1                     | 1                       | 6                              |                           |                           |                                | 58                                     |                           |                                  |                        | 523                                  | 58                                   |                                         | 35                              |                                                       | 58                                       | 35.4                       | 2053                                          | 488                                             | 0.80                      | 390                                          |                     | 2443.6                                       | 407.2666667                        |                                   | 342                                      | 488                                            | 0.83                     | 405.04                         |                                | 514.06             | -109.02                             | -148.48                         | -257.50                           |                               |
| 56               | 1977 | Li Cuilan                         | 2               | middle-class peasant     | 14                    | 2                      | 1                     | 1                       | 3                              |                           |                           |                                | 30                                     |                           |                                  |                        | 472                                  | 30                                   |                                         | 35                              |                                                       | 30                                       | 35.4                       | 1062                                          | 437                                             | 0.80                      | 350                                          |                     | 1411.6                                       | 470.5333333                        |                                   | 171                                      | 437                                            | 0.83                     | 362.71                         |                                | 320.49             | 42.22                               | 17.98                           | 60.20                             |                               |
| 57               | 1977 | Ma Shanming                       | 2               | middle-class peasant     | 20.5                  | 4                      | 1                     | 3                       | 7                              |                           |                           |                                | 70                                     |                           |                                  |                        | 940                                  | 70                                   |                                         | 51                              |                                                       | 70                                       | 35.4                       | 2478                                          | 889                                             | 0.80                      | 711                                          |                     | 3189.2                                       | 455.6                              |                                   | 399                                      | 889                                            | 0.83                     | 737.87                         |                                | 710.27             | 27.60                               | -853.30                         | -825.70                           |                               |
| 58               | 1977 | Liang Xiulan                      | 2               | middle-class peasant     | 6.5                   | 2                      | 0                     | 2                       | 3                              |                           |                           |                                | 30                                     |                           |                                  |                        | 329                                  | 30                                   |                                         | 16                              |                                                       | 30                                       | 35.4                       | 1062                                          | 313                                             | 0.80                      | 250                                          |                     | 1312.4                                       | 437.4666667                        |                                   | 171                                      | 313                                            | 0.83                     | 259.79                         |                                | 280.89             | -21.10                              | 41.97                           | 20.87                             |                               |
| 59               | 1977 | Cui Yongchang                     | 1               | poor peasant             | 2.5                   | 1                      | 0                     | 1                       | 4                              |                           |                           |                                | 40                                     |                           |                                  |                        | 735                                  | 40                                   |                                         | 6                               |                                                       | 40                                       | 35.4                       | 1416                                          | 729                                             | 0.72                      | 525                                          |                     | 1940.88                                      | 485.22                             |                                   | 228                                      | 729                                            | 0.77                     | 561.33                         |                                | 444.85             | 116.48                              | 282.77                          | 399.25                            |                               |
| 60               | 1977 | Zhang Hengshou                    | 1               | low-middle-class peasant | 20.5                  | 4                      | 1                     | 3                       | 8                              |                           |                           |                                | 76                                     |                           |                                  |                        | 926                                  | 76                                   |                                         | 51                              |                                                       | 76                                       | 35.4                       | 2690                                          | 875                                             | 0.72                      | 630                                          |                     | 3320.4                                       | 415.05                             |                                   | 456                                      | 875                                            | 0.77                     | 673.75                         |                                | 790.29             | -116.54                             | 95.75                           | -20.79                            |                               |
| 61               | 1977 | Zhao Yingtong                     | 1               | poor peasant             | 10                    | 1                      | 1                     | 0                       | 3                              |                           |                           |                                | 30                                     |                           |                                  |                        | 699                                  | 30                                   |                                         | 25                              |                                                       | 30                                       | 35.4                       | 1062                                          | 674                                             | 0.72                      | 485                                          |                     | 1547.28                                      | 515.76                             |                                   | 171                                      | 674                                            | 0.77                     | 518.98                         |                                | 466.69             | 52.29                               | 471.49                          | 523.78                            |                               |
| 62               | 1977 | Wu Xinggui                        | 1               | poor peasant             | 14                    | 2                      | 1                     | 1                       | 7                              |                           |                           |                                | 54                                     |                           |                                  |                        | 683                                  | 54                                   |                                         | 35                              |                                                       | 54                                       | 35.4                       | 1912                                          | 648                                             | 0.72                      | 467                                          |                     | 2378.16                                      | 339.7371429                        |                                   | 342                                      | 648                                            | 0.77                     | 498.96                         |                                | 542.80             | -43.84                              | 66.37                           | 22.53                             |                               |
| 63               | 1977 | Wang Youfeng                      | 1               | poor peasant             | 4                     | 1                      | 0                     | 1                       | 3                              |                           |                           |                                | 30                                     |                           |                                  |                        | 378                                  | 30                                   |                                         | 10                              |                                                       | 30                                       | 35.4                       | 1062                                          | 368                                             | 0.72                      | 265                                          |                     | 1326.96                                      | 442.32                             |                                   | 171                                      | 368                                            | 0.77                     | 283.36                         |                                | 284.31             | -0.95                               | 123.48                          | 122.53                            |                               |
| 64               | 1977 | Wang Qingsheng                    | 1               | poor peasant             |                       | 1                      | 1                     | 0                       | 1                              |                           |                           |                                | 10                                     |                           |                                  |                        | 437                                  | 10                                   |                                         |                                 |                                                       | 10                                       | 35.4                       | 354                                           | 437                                             | 0.72                      | 315                                          |                     | 668.64                                       | 668.64                             |                                   | 57                                       | 437                                            | 0.77                     | 336.49                         |                                | 212.45             | 124.04                              | 612.15                          | 736.19                            |                               |
| 65               | 1977 | Li Yulin                          | 1               | middle-class peasant     |                       | 0                      |                       |                         | 2                              |                           |                           |                                | 20                                     |                           |                                  |                        | 86                                   | 20                                   |                                         |                                 |                                                       | 20                                       | 35.4                       | 708                                           | 86                                              | 0.72                      | 62                                           |                     | 769.92                                       | 384.96                             |                                   | 114                                      | 86                                             | 0.77                     | 66.22                          |                                | 215.90             | -149.68                             | 116.76                          | -32.92                            |                               |
| 66               | 1977 | Zuo Chunlan                       | 1               | middle-class peasant     | 14                    | 2                      | 1                     | 1                       | 5                              |                           |                           |                                | 50                                     |                           |                                  |                        | 366                                  | 50                                   |                                         | 35                              |                                                       | 50                                       | 35.4                       | 1770                                          | 331                                             | 0.72                      | 238                                          |                     | 2008.32                                      | 401.664                            |                                   | 285                                      | 331                                            | 0.77                     | 254.87                         | 20                             | 377.35             | -102.48                             | 47.74                           | -54.74                            |                               |
| 67               | 1977 | Gao Chongji                       | 1               | poor peasant             | 18.5                  | 5                      | 0                     | 5                       | 7                              |                           |                           |                                | 70                                     |                           |                                  |                        | 1217                                 | 70                                   |                                         | 46                              |                                                       | 70                                       | 35.4                       | 2478                                          | 1171                                            | 0.72                      | 843                                          |                     | 3321.12                                      | 474.4457143                        |                                   | 399                                      | 1171                                           | 0.77                     | 901.67                         |                                | 1029.35            | -127.68                             | 1034.25                         | 906.57                            |                               |
| 68               | 1977 | Gao Chongwen                      | 1               | poor peasant             | 24.5                  | 4                      | 2                     | 2                       | 8                              |                           |                           |                                | 80                                     |                           |                                  |                        | 1149                                 | 80                                   |                                         | 61                              |                                                       | 80                                       | 35.4                       | 2832                                          | 1088                                            | 0.72                      | 783                                          |                     | 3615.36                                      | 451.92                             |                                   | 456                                      | 1088                                           | 0.77                     | 837.76                         |                                | 905.06             | -67.30                              | 319.93                          | 252.63                            |                               |
| 69               | 1977 | Gao Peiren                        | 1               | poor peasant             | 14                    | 4                      | 1                     | 3                       | 7                              |                           |                           |                                | 70                                     |                           |                                  |                        | 1074                                 | 70                                   |                                         | 35                              |                                                       | 70                                       | 35.4                       | 2478                                          | 1039                                            | 0.72                      | 748                                          |                     | 3226.08                                      | 460.8685714                        |                                   | 456                                      | 1039                                           | 0.77                     | 800.03                         |                                | 903.31             | -103.28                             | 659.86                          | 556.58                            |                               |

(cont.)

| APPENDIX D       |      |                                   |                 |                          |                       |                        |                       |                         |                                |                           |                           |                                |                                        |                           |                                  |                        |                                      |                                      |                                         |                                 |                                                       |                                          |                            |                                               |                                                 |                           |                                              |                     |                                              |                                    |                                   |                                          |                                                |                          |                                |                                |                    |                                     |                                 |                                   |                               |
|------------------|------|-----------------------------------|-----------------|--------------------------|-----------------------|------------------------|-----------------------|-------------------------|--------------------------------|---------------------------|---------------------------|--------------------------------|----------------------------------------|---------------------------|----------------------------------|------------------------|--------------------------------------|--------------------------------------|-----------------------------------------|---------------------------------|-------------------------------------------------------|------------------------------------------|----------------------------|-----------------------------------------------|-------------------------------------------------|---------------------------|----------------------------------------------|---------------------|----------------------------------------------|------------------------------------|-----------------------------------|------------------------------------------|------------------------------------------------|--------------------------|--------------------------------|--------------------------------|--------------------|-------------------------------------|---------------------------------|-----------------------------------|-------------------------------|
| Household number | Year | Name of the head of the household | Production team | Class status (1)         | Basic work points (2) | Total labor forces (3) | Male labor forces (4) | Female labor forces (5) | Total household population (6) | Age: 1 to 3 years old (7) | Age: 4 to 7 years old (8) | Age: 8 years old and above (9) | Work points of grain distribution (10) | Laboring work points (11) | Farmyard manure work points (12) | Total work points (13) | Work points of compulsory labor (14) | Work points of help cultivation (15) | Work points of private plots labor (16) | Total deducted work points (17) | Acutal workdays of participation in distribution (18) | Workpoints for rations distribution (19) | Rations per workpoint (20) | Total rations received form distribution (21) | Workdays of participation in distribu-tion (22) | Grains per workpoint (23) | Total grains distributed by work-points (24) | Grains subsidy (25) | Total Grains received from distribution (26) | Distributed grains per person (27) | Distributed grains per adult (28) | Grains received from privated plots (29) | Workdays of participation in distribution (30) | Value per workpoint (31) | Total value of workpoints (32) | Money used for investment (33) | Sum of income (34) | Money distributed in this year (34) | Deposit/ debt of this year (35) | Deposit/ debt over the years (36) | Accumulated deposit/debt (37) |
| 70               | 1977 | Wang Jingyi                       | 1               | low-middle-class peasant |                       | 0                      |                       |                         |                                |                           |                           |                                |                                        |                           |                                  |                        | 0                                    |                                      |                                         |                                 | 0                                                     | 35.4                                     | 0                          | 0                                             | 0.72                                            | 0                         | 0                                            | #DIV/0!             |                                              | 0                                  | 0                                 | 0.77                                     | 0.00                                           |                          |                                |                                |                    | 0.00                                |                                 | 0.00                              |                               |
| 71               | 1977 | Wang Shutang                      | 1               | low-middle-class peasant | 14                    | 2                      | 1                     | 1                       | 5                              |                           |                           |                                | 48                                     |                           |                                  |                        | 590                                  | 48                                   |                                         | 35                              |                                                       | 48                                       | 35.4                       | 1699                                          | 555                                             | 0.72                      | 400                                          | 2098.8              | 419.76                                       |                                    | 285                               | 555                                      | 0.77                                           | 427.35                   |                                |                                | 472.45             | -45.10                              | 347.38                          | 302.28                            |                               |
| 72               | 1977 | Meng Peizhong                     | 1               | middle-class peasant     |                       | 0                      |                       |                         | 1                              |                           |                           |                                | 10                                     |                           |                                  |                        | 353                                  | 10                                   |                                         |                                 | 10                                                    | 35.4                                     | 354                        | 353                                           | 0.72                                            | 254                       | 608.16                                       | 608.16              |                                              | 57                                 | 353                               | 0.77                                     | 271.81                                         |                          |                                | 263.56                         | 8.25               | 601.11                              | 609.36                          |                                   |                               |
| 73               | 1977 | Meng Peixing                      | 1               | middle-class peasant     | 13                    | 3                      | 1                     | 2                       | 4                              |                           |                           |                                | 40                                     |                           |                                  |                        | 640                                  | 40                                   |                                         | 33                              |                                                       | 40                                       | 35.4                       | 1416                                          | 607                                             | 0.72                      | 437                                          | 1853.04             | 463.26                                       |                                    | 228                               | 607                                      | 0.77                                           | 467.39                   |                                |                                | 472.84             | -5.45                               | 141.92                          | 136.47                            |                               |
| 74               | 1977 | Meng Mingbiao                     | 1               | middle-class peasant     | 14                    | 2                      | 1                     | 1                       | 7                              |                           |                           |                                | 68                                     |                           |                                  |                        | 789                                  | 68                                   |                                         | 35                              |                                                       | 68                                       | 35.4                       | 2407                                          | 754                                             | 0.72                      | 543                                          | 2950.08             | 421.44                                       |                                    | 399                               | 754                                      | 0.77                                           | 580.58                   |                                |                                | 719.49             | -138.91                             | -408.70                         | -547.61                           |                               |
| 75               | 1977 | Xue Yuhua                         | 2               | poor peasant             | 16.5                  | 3                      | 1                     | 2                       | 3                              |                           |                           |                                | 30                                     |                           |                                  |                        | 525                                  | 30                                   |                                         | 41                              |                                                       | 30                                       | 35.4                       | 1062                                          | 484                                             | 0.80                      | 387                                          | 1449.2              | 483.0666667                                  |                                    | 171                               | 484                                      | 0.83                                           | 401.72                   | 23.65                          |                                | 398.62             | 26.75                               | -166.17                         | -139.42                           |                               |
| 76               | 1977 | Wang Chuanai                      | 1               | middle-class peasant     | 4                     | 1                      | 0                     | 1                       | 7                              |                           |                           |                                | 62                                     |                           |                                  |                        | 94                                   | 62                                   |                                         | 10                              |                                                       | 62                                       | 35.4                       | 2165                                          | 84                                              | 0.72                      | 60                                           | 2225.48             | 317.9257143                                  |                                    | 342                               | 84                                       | 0.77                                           | 64.68                    | 165                            |                                | 392.03             | -162.35                             | -306.40                         | -468.75                           |                               |
| 77               | 1977 | Wang Zhenguo                      | 2               | low-middle-class peasant | 10.5                  | 2                      | 1                     | 1                       | 4                              |                           |                           |                                | 40                                     |                           |                                  |                        | 610                                  | 40                                   |                                         | 26                              |                                                       | 40                                       | 35.4                       | 1416                                          | 584                                             | 0.80                      | 467                                          | 1883.2              | 470.8                                        |                                    | 228                               | 584                                      | 0.83                                           | 484.72                   |                                |                                | 578.19             | -93.47                              | 308.26                          | 214.79                            |                               |
| 78               | 1977 | Mu Shouquan                       | 1               | poor peasant             | 2.5                   | 1                      | 0                     | 1                       | 2                              |                           |                           |                                | 20                                     |                           |                                  |                        | 383                                  | 20                                   |                                         | 6                               |                                                       | 20                                       | 35.4                       | 708                                           | 377                                             | 0.72                      | 271                                          | 979.44              | 489.72                                       |                                    | 114                               | 377                                      | 0.77                                           | 290.29                   |                                |                                | 265.12             | 25.17                               | 657.51                          | 682.68                            |                               |
| 79               | 1977 | Mu Zhaozheng                      | 1               | poor peasant             | 14                    | 2                      | 1                     | 1                       | 6                              |                           |                           |                                | 58                                     |                           |                                  |                        | 679                                  | 58                                   |                                         | 35                              |                                                       | 58                                       | 35.4                       | 2053                                          | 644                                             | 0.72                      | 464                                          | 2516.88             | 419.48                                       |                                    | 342                               | 644                                      | 0.77                                           | 495.88                   |                                |                                | 650.14             | -154.26                             | 555.41                          | 401.15                            |                               |
| 80               | 1977 | Ma Likui                          | 1               | poor peasant             | 18                    | 3                      | 1                     | 2                       | 8                              |                           |                           |                                | 70                                     |                           |                                  |                        | 1142                                 | 70                                   |                                         | 45                              |                                                       | 70                                       | 35.4                       | 2424                                          | 1097                                            | 0.72                      | 790                                          | 3213.84             | 401.73                                       |                                    | 399                               | 1097                                     | 0.77                                           | 844.69                   |                                |                                | 830.36             | 14.33                               | 1366.31                         | 1380.64                           |                               |
| 81               | 1977 | Ma Xiulan                         | 1               | middle-class peasant     | 4                     | 1                      | 0                     | 1                       | 6                              |                           |                           |                                | 58                                     |                           |                                  |                        | 288                                  | 58                                   |                                         | 10                              |                                                       | 58                                       | 35.4                       | 2053                                          | 278                                             | 0.72                      | 200                                          | 2253.36             | 375.56                                       |                                    | 342                               | 278                                      | 0.77                                           | 214.06                   | 130                            |                                | 403.60             | -59.54                              | -57.46                          | -117.00                           |                               |
| 82               | 1977 | Wang Dianjie                      | 1               | middle-class peasant     | 14                    | 3                      | 1                     | 2                       | 7                              |                           |                           |                                | 70                                     |                           |                                  |                        | 945                                  | 70                                   |                                         | 10                              |                                                       | 70                                       | 35.4                       | 2478                                          | 935                                             | 0.72                      | 673                                          | 3151.2              | 450.1714286                                  |                                    | 456                               | 935                                      | 0.77                                           | 719.95                   |                                |                                | 731.18             | -11.23                              | 480.13                          | 468.90                            |                               |
| 83               | 1977 | Wang Litang                       | 2               | low-middle-class peasant | 14                    | 2                      | 1                     | 1                       | 8                              |                           |                           |                                | 78                                     |                           |                                  |                        | 1204                                 | 78                                   |                                         | 35                              |                                                       | 78                                       | 35.4                       | 2761                                          | 1169                                            | 0.80                      | 935                                          | 3696.4              | 462.05                                       |                                    | 456                               | 1169                                     | 0.83                                           | 970.27                   |                                |                                | 934.87             | 35.40                               | 313.56                          | 348.96                            |                               |
| 84               | 1977 | Wei Zhaoliang                     | 1               | low-middle-class peasant | 10.5                  | 2                      | 1                     | 1                       | 3                              |                           |                           |                                | 30                                     |                           |                                  |                        | 504                                  | 30                                   |                                         | 26                              |                                                       | 30                                       | 35.4                       | 1062                                          | 478                                             | 0.72                      | 344                                          | 1406.16             | 468.72                                       |                                    | 171                               | 478                                      | 0.77                                           | 368.06                   |                                |                                | 404.86             | -36.80                              | 348.14                          | 311.34                            |                               |
| 85               | 1977 | Yang Zhongwen                     | 1               | middle-class peasant     |                       | 0                      |                       |                         | 1                              |                           |                           |                                | 10                                     |                           |                                  |                        | 16                                   | 10                                   |                                         |                                 | 10                                                    | 35.4                                     | 354                        | 16                                            | 0.72                                            | 12                        | 365.52                                       | 365.52              |                                              | 57                                 | 16                                | 0.77                                     | 12.32                                          |                          |                                | 76.19                          | -63.87             | -1177.33                            | -1241.20                        |                                   |                               |
| 86               | 1977 | Zhu Guangchang                    | 1               | middle-class peasant     | 24                    | 3                      | 2                     | 1                       | 4                              |                           |                           |                                | 40                                     |                           |                                  |                        | 671                                  | 40                                   |                                         | 60                              |                                                       | 40                                       | 35.4                       | 1416                                          | 611                                             | 0.72                      | 440                                          | 1855.92             | 463.98                                       |                                    | 228                               | 611                                      | 0.77                                           | 470.47                   |                                |                                | 736.64             | -266.17                             | 817.58                          | 551.41                            |                               |
| 87               | 1977 | Yang Yugui                        | 1               | middle-class peasant     | 18                    | 2                      | 2                     | 0                       | 2                              |                           |                           |                                | 20                                     |                           |                                  |                        | 709                                  | 20                                   |                                         | 45                              |                                                       | 20                                       | 35.4                       | 708                                           | 664                                             | 0.72                      | 478                                          | 1186.08             | 593.04                                       |                                    | 171                               | 664                                      | 0.77                                           | 511.28                   |                                |                                | 407.06             | 104.22                              | 225.73                          | 329.95                            |                               |



(cont.)

| Household number | Year | Name of the head of the household | Production team | Class status (1)         | Basic work points (2) | Total labor forces (3) | Male labor forces (4) | Female labor forces (5) | Total household population (6) | Age: 1 to 3 years old (7) | Age: 4 to 7 years old (8) | Age: 8 years old and above (9) | Work points of grain distribution (10) | Laboring work points (11) | Farmyard work points (12) | Total work points (13) | Work points of compulsory labor (14) | Work points of help cultivation (15) | Work points of private plots labor (16) | Total deducted work points (17) | Acutal workdays of participation in distribution (18) | Workpoints for rations distribution (19) | Rations per workpoint (20) | Total rations received form distribution (21) | Workdays of participation in distribu-tion (22) | Grains per workpoint (23) | Total grains distributed by work-points (24) | Grains subsidy (25) | Total Grains received from distribution (26) | Distributed grains per person (27) | Distributed grains per adult (28) | Grains received from privated plots (29) | Workdays of participation in distribution (30) | Value per workpoint (31) | Total value of workpoints (32) | Money used for investment (33) | Sum of income (34) | Money distributed in this year (34) | Deposit/ debt of this year (35) | Deposit/ debt over the years (36) | Accumulated deposit/debt (37) |
|------------------|------|-----------------------------------|-----------------|--------------------------|-----------------------|------------------------|-----------------------|-------------------------|--------------------------------|---------------------------|---------------------------|--------------------------------|----------------------------------------|---------------------------|---------------------------|------------------------|--------------------------------------|--------------------------------------|-----------------------------------------|---------------------------------|-------------------------------------------------------|------------------------------------------|----------------------------|-----------------------------------------------|-------------------------------------------------|---------------------------|----------------------------------------------|---------------------|----------------------------------------------|------------------------------------|-----------------------------------|------------------------------------------|------------------------------------------------|--------------------------|--------------------------------|--------------------------------|--------------------|-------------------------------------|---------------------------------|-----------------------------------|-------------------------------|
| 88               | 1977 | Yang Yingzhou                     | 2               | middle-class peasant     | 24                    | 3                      | 2                     | 1                       | 3                              |                           |                           |                                | 30                                     |                           |                           | 843                    | 30                                   |                                      |                                         | 60                              |                                                       | 30                                       | 35.4                       | 1062                                          | 783                                             | 0.80                      | 626                                          | 1688.4              | 562.8                                        |                                    | 171                               | 783                                      | 0.83                                           | 649.89                   |                                |                                | 586.67             | 63.22                               | 198.26                          | 261.48                            |                               |
| 89               | 1977 | Li Kailiang                       | 1               | poor peasant             | 10                    | 1                      | 1                     | 0                       | 2                              |                           |                           |                                | 20                                     |                           |                           | 296                    | 20                                   |                                      |                                         | 25                              |                                                       | 20                                       | 35.4                       | 708                                           | 271                                             | 0.72                      | 195                                          | 903.12              | 451.56                                       |                                    | 114                               | 271                                      | 0.77                                           | 208.67                   |                                |                                | 250.20             | -41.53                              | 152.59                          | 111.06                            |                               |
| 90               | 1977 | Li Kaigong                        | 1               | poor peasant             | 2.5                   | 1                      | 0                     | 1                       | 2                              |                           |                           |                                | 20                                     |                           |                           | 308                    | 20                                   |                                      |                                         | 6                               |                                                       | 20                                       | 35.4                       | 708                                           | 302                                             | 0.72                      | 217                                          | 925.44              | 462.72                                       |                                    | 114                               | 302                                      | 0.77                                           | 232.54                   |                                |                                | 310.21             | -77.67                              | 542.32                          | 464.65                            |                               |
| 91               | 1977 | Meng Jingcan                      | 1               | poor peasant             |                       | 0                      |                       |                         |                                |                           |                           |                                |                                        |                           |                           |                        | 0                                    |                                      |                                         |                                 |                                                       | 0                                        | 35.4                       | 0                                             | 0                                               | 0.72                      | 0                                            | 0                   | #DIV/0!                                      | 0                                  | 0                                 | 0.77                                     | 0.00                                           |                          |                                | 0.00                           |                    |                                     | 0.00                            |                                   |                               |
| 92               | 1977 | Fu Lidong                         | 1               | middle-class peasant     |                       | 0                      |                       |                         | 1                              |                           |                           |                                | 10                                     |                           |                           | 158                    | 10                                   |                                      |                                         |                                 |                                                       | 10                                       | 35.4                       | 354                                           | 158                                             | 0.72                      | 114                                          | 467.76              | 467.76                                       |                                    | 57                                | 158                                      | 0.77                                           | 121.66                   |                                |                                | 148.44             | -26.78                              | 209.07                          | 182.29                            |                               |
| 93               | 1977 | Meng Peicheng                     | 2               | middle-class peasant     | 22                    | 3                      | 2                     | 1                       | 9                              |                           |                           |                                | 86                                     |                           |                           | 861                    | 86                                   |                                      |                                         | 55                              |                                                       | 86                                       | 35.4                       | 3044                                          | 806                                             | 0.80                      | 645                                          | 3689.2              | 409.9111111                                  |                                    | 513                               | 806                                      | 0.83                                           | 668.98                   |                                |                                | 928.21             | -259.23                             | -1845.75                        | -2104.98                          |                               |
| 94               | 1977 | Mu Shouwen                        | 1               | middle-class peasant     |                       | 0                      |                       |                         |                                |                           |                           |                                |                                        |                           |                           |                        | 0                                    |                                      |                                         |                                 |                                                       | 0                                        | 35.4                       | 0                                             | 0                                               | 0.72                      | 0                                            | 0                   | #DIV/0!                                      | 0                                  | 0                                 | 0.77                                     | 0.00                                           |                          |                                | 0.00                           |                    |                                     | 0.00                            |                                   |                               |
| 95               | 1977 | Mu Zhaorui                        | 1               | middle-class peasant     | 14                    | 2                      | 1                     | 1                       | 3                              |                           |                           |                                | 28                                     |                           |                           | 576                    | 28                                   |                                      |                                         | 35                              |                                                       | 28                                       | 35.4                       | 991                                           | 541                                             | 0.72                      | 390                                          | 1380.72             | 460.24                                       |                                    | 171                               | 541                                      | 0.77                                           | 416.57                   |                                |                                | 469.74             | -53.17                              | 583.33                          | 530.16                            |                               |
| 96               | 1977 | Zhang Lirong                      | 2               | middle-class peasant     | 14                    | 2                      | 1                     | 1                       | 5                              |                           |                           |                                | 44                                     |                           |                           | 684                    | 44                                   |                                      |                                         | 35                              |                                                       | 44                                       | 35.4                       | 1558                                          | 649                                             | 0.80                      | 519                                          | 2076.8              | 415.36                                       |                                    | 285                               | 649                                      | 0.83                                           | 538.67                   |                                |                                | 519.06             | 19.61                               | 764.82                          | 784.43                            |                               |
| 97               | 1977 | Cui Yongfu                        | 1               | poor peasant             |                       | 0                      |                       |                         |                                |                           |                           |                                |                                        |                           |                           |                        | 0                                    |                                      |                                         |                                 |                                                       | 0                                        | 35.4                       | 0                                             | 0                                               | 0.72                      | 0                                            | 0                   | #DIV/0!                                      | 0                                  | 0                                 | 0.77                                     | 0.00                                           |                          |                                | 0.00                           |                    |                                     | 0.00                            |                                   |                               |
| 98               | 1977 | Meng Lanying                      | 1               | poor peasant             |                       | 0                      |                       |                         |                                |                           |                           |                                |                                        |                           |                           |                        | 0                                    |                                      |                                         |                                 |                                                       | 0                                        | 35.4                       | 0                                             | 0                                               | 0.72                      | 0                                            | 0                   | #DIV/0!                                      | 0                                  | 0                                 | 0.77                                     | 0.00                                           |                          |                                | 0.00                           |                    |                                     | 0.00                            |                                   |                               |
| 99               | 1977 | Cui Yiren                         | 1               | poor peasant             | 14                    | 2                      | 1                     | 1                       | 6                              |                           |                           |                                | 56                                     |                           |                           | 422                    | 56                                   |                                      |                                         | 35                              |                                                       | 56                                       | 35.4                       | 1982                                          | 387                                             | 0.72                      | 279                                          | 2261.04             | 376.84                                       |                                    | 342                               | 387                                      | 0.77                                           | 297.99                   |                                |                                | 630.93             | -332.94                             | -192.23                         | -525.17                           |                               |
| 100              | 1977 | Wang Qingde                       | 1               | low-middle-class peasant |                       | 0                      |                       |                         | 1                              |                           |                           |                                | 10                                     |                           |                           | 424                    | 10                                   |                                      |                                         |                                 |                                                       | 10                                       | 35.4                       | 354                                           | 424                                             | 0.72                      | 305                                          | 659.28              | 659.28                                       |                                    | 57                                | 424                                      | 0.77                                           | 326.48                   |                                |                                | 248.03             | 78.45                               | 572.82                          | 651.27                            |                               |
| 101              | 1977 | Jin Lianyu                        | 1               | poor peasant             |                       | 0                      |                       |                         | 1                              |                           |                           |                                | 10                                     |                           |                           |                        | 10                                   |                                      |                                         |                                 |                                                       | 10                                       | 35.4                       | 354                                           | 0                                               | 0.72                      | 0                                            | 354                 | 354                                          |                                    | 57                                | 0                                        | 0.77                                           | 0.00                     | 315.59                         |                                |                    | 102.69                              | 212.90                          | -315.59                           | -102.69                       |
| 102              | 1977 | Wang Qiyi                         | 1               | poor peasant             | 14                    | 2                      | 1                     | 1                       | 10                             |                           |                           |                                | 100                                    |                           |                           | 974                    | 100                                  |                                      |                                         | 35                              |                                                       | 100                                      | 35.4                       | 3540                                          | 939                                             | 0.80                      | 751                                          | 4291.2              | 429.12                                       |                                    | 570                               | 939                                      | 0.83                                           | 779.37                   | 75                             |                                | 889.84             | -35.47                              | -435.48                         | -470.95                           |                               |
| 103              | 1977 | Yang Chengye                      | 1               | poor peasant             |                       | 0                      |                       |                         | 1                              |                           |                           |                                | 10                                     |                           |                           | 93                     | 10                                   |                                      |                                         |                                 |                                                       | 10                                       | 35.4                       | 354                                           | 93                                              | 0.72                      | 67                                           | 420.96              | 420.96                                       |                                    | 57                                | 93                                       | 0.77                                           | 71.61                    |                                |                                | 95.22              | -23.61                              | 104.51                          | 80.90                             |                               |
| 104              | 1977 | Meng Mingjian                     | 1               | poor peasant             |                       | 0                      |                       |                         |                                |                           |                           |                                |                                        |                           |                           |                        | 0                                    |                                      |                                         |                                 |                                                       | 0                                        | 35.4                       | 0                                             | 0                                               | 0.72                      | 0                                            | 0                   | #DIV/0!                                      | 0                                  | 0                                 | 0.77                                     | 0.00                                           |                          |                                | 0.00                           |                    |                                     | 0.00                            |                                   |                               |
| 105              | 1977 | Guo Yuexiang                      | 1               | poor peasant             |                       | 0                      |                       |                         |                                |                           |                           |                                |                                        |                           |                           |                        | 0                                    |                                      |                                         |                                 |                                                       | 0                                        | 35.4                       | 0                                             | 0                                               | 0.72                      | 0                                            | 0                   | #DIV/0!                                      | 0                                  | 0                                 | 0.77                                     | 0.00                                           |                          |                                | 0.00                           |                    |                                     | 0.00                            |                                   |                               |
| 106              | 1977 | Wu Congchao                       | 2               | poor peasant             | 12                    | 2                      | 1                     | 1                       | 7                              |                           |                           |                                | 70                                     |                           |                           | 565                    | 70                                   |                                      |                                         | 30                              |                                                       | 70                                       | 35.4                       | 2478                                          | 535                                             | 0.80                      | 428                                          | 2906                | 415.1428571                                  |                                    | 399                               | 535                                      | 0.83                                           | 444.05                   |                                |                                | 715.53             | -271.48                             | -381.61                         | -653.09                           |                               |
| 107              | 1977 | Xie Yuzhen                        | 2               | poor peasant             |                       | 0                      |                       |                         |                                |                           |                           |                                |                                        |                           |                           |                        | 0                                    |                                      |                                         |                                 |                                                       | 0                                        | 35.4                       | 0                                             | 0                                               | 0.80                      | 0                                            | 0                   | #DIV/0!                                      | 0                                  | 0                                 | 0.83                                     | 0.00                                           |                          |                                | 0.00                           |                    |                                     | 0.00                            |                                   |                               |
| 108              | 1977 | Wu Songlin                        | 2               | poor peasant             |                       | 0                      |                       |                         |                                |                           |                           |                                |                                        |                           |                           |                        | 0                                    |                                      |                                         |                                 |                                                       | 0                                        | 35.4                       | 0                                             | 0                                               | 0.80                      | 0                                            | 0                   | #DIV/0!                                      | 0                                  | 0                                 | 0.83                                     | 0.00                                           |                          |                                | 0.00                           |                    |                                     | 0.00                            |                                   |                               |
| 109              | 1977 | Yang Chunmei                      | 2               | poor peasant             |                       | 0                      |                       |                         |                                |                           |                           |                                |                                        |                           |                           |                        | 0                                    |                                      |                                         |                                 |                                                       | 0                                        | 35.4                       | 0                                             | 0                                               | 0.80                      | 0                                            | 0                   | #DIV/0!                                      | 0                                  | 0                                 | 0.83                                     | 0.00                                           |                          |                                | 0.00                           |                    |                                     | 0.00                            |                                   |                               |
| 110              | 1977 | Wu Yulan                          | 2               | poor peasant             | 4                     | 1                      | 0                     | 1                       | 6                              |                           |                           |                                | 58                                     |                           |                           | 368                    | 58                                   |                                      |                                         | 10                              |                                                       | 58                                       | 35.4                       | 2053                                          | 358                                             | 0.80                      | 286                                          | 2339.6              | 389.9333333                                  |                                    | 342                               | 358                                      | 0.83                                           | 297.14                   | 110                            |                                | 465.46             | -58.32                              | -26.24                          | -84.56                            |                               |
| 111              | 1977 | Hua Suzhen                        | 1               | poor peasant             |                       | 0                      |                       |                         | 1                              |                           |                           |                                | 10                                     |                           |                           | 47                     | 10                                   |                                      |                                         |                                 |                                                       | 10                                       | 35.4                       | 354                                           | 47                                              | 0.72                      | 34                                           | 387.84              | 387.84                                       |                                    | 57                                | 47                                       | 0.77                                           | 36.19                    |                                |                                | 94.70              | -58.51                              | -5.37                           | -63.88                            |                               |
| 112              | 1977 | Song Liangxiang                   | 2               | poor peasant             | 4                     | 1                      | 0                     | 1                       | 2                              |                           |                           |                                | 18                                     |                           |                           | 33                     | 18                                   |                                      |                                         | 10                              |                                                       | 18                                       | 35.4                       | 637                                           | 23                                              | 0.80                      | 18                                           | 655.6               | 327.8                                        |                                    | 114                               | 23                                       | 0.83                                           | 19.09                    | 120                            |                                | 108.31             | 30.78                               | 46.04                           | 76.82                             |                               |



(cont.)

| Household number | Year | Name of the head of the household | Production team | Class status (1)         | Basic work points (2) | Total labor forces (3) | Male labor forces (4) | Female labor forces (5) | Total household population (6) | Age: 1 to 3 years old (7) | Age: 4 to 7 years old (8) | Age: 8 years old and above (9) | Work points of grain distribution (10) | Laboring work points (11) | Farmyard manure work points (12) | Total work points (13) | Work points of compulsory labor (14) | Work points of help cultivation (15) | Work points of private plots labor (16) | Total deducted work points (17) | Actual workdays of participation in distribution (18) | Workpoints for rations distribution (19) | Rations per workpoint (20) | Total rations received from distribution (21) | Workdays of participation in distribution (22) | Grains per workpoint (23) | Total grains distributed by work-points (24) | Grains subsidy (25) | Total Grains received from distribution (26) | Distributed grains per person (27) | Distributed grains per adult (28) | Grains received from private plots (29) | Workdays of participation in distribution (30) | Value per workpoint (31) | Total value of workpoints (32) | Money used for investment (33) | Sum of income (34) | Money distributed in this year (34) | Deposit/debt of this year (35) | Deposit/debt over the years (36) | Accumulated deposit/debt (37) |
|------------------|------|-----------------------------------|-----------------|--------------------------|-----------------------|------------------------|-----------------------|-------------------------|--------------------------------|---------------------------|---------------------------|--------------------------------|----------------------------------------|---------------------------|----------------------------------|------------------------|--------------------------------------|--------------------------------------|-----------------------------------------|---------------------------------|-------------------------------------------------------|------------------------------------------|----------------------------|-----------------------------------------------|------------------------------------------------|---------------------------|----------------------------------------------|---------------------|----------------------------------------------|------------------------------------|-----------------------------------|-----------------------------------------|------------------------------------------------|--------------------------|--------------------------------|--------------------------------|--------------------|-------------------------------------|--------------------------------|----------------------------------|-------------------------------|
| 113              | 1977 | Zhang Dongde                      | 1               | poor peasant             | 4                     | 1                      | 0                     | 1                       | 3                              |                           |                           |                                | 30                                     |                           |                                  |                        | 552                                  | 30                                   |                                         | 10                              |                                                       | 30                                       | 35.4                       | 1062                                          | 542                                            | 0.72                      | 390                                          |                     | 1452.24                                      | 484.08                             |                                   | 171                                     | 542                                            | 0.77                     | 417.34                         |                                | 367.78             | 49.56                               | 501.30                         | 550.86                           |                               |
| 114              | 1977 | Zhang Zhenyuan                    | 1               | poor peasant             | 14                    | 2                      | 1                     | 1                       | 6                              |                           |                           |                                | 54                                     |                           |                                  |                        | 602                                  | 54                                   |                                         | 35                              |                                                       | 54                                       | 35.4                       | 1912                                          | 567                                            | 0.72                      | 408                                          |                     | 2319.84                                      | 386.64                             |                                   | 342                                     | 567                                            | 0.77                     | 436.59                         |                                | 563.32             | -126.73                             | 89.11                          | -37.62                           |                               |
| 115              | 1977 | Meng Qingyun                      | 2               | poor peasant             |                       | 0                      |                       |                         | 1                              |                           |                           |                                | 10                                     |                           |                                  |                        | 265                                  | 10                                   |                                         |                                 |                                                       | 10                                       | 35.4                       | 354                                           | 265                                            | 0.80                      | 212                                          |                     | 566                                          | 566                                |                                   | 57                                      | 265                                            | 0.83                     | 219.95                         |                                | 198.82             | 21.13                               | 740.22                         | 761.35                           |                               |
| 116              | 1977 | Zhao Hongsheng                    | 1               | low-middle-class peasant |                       | 2                      | 1                     | 1                       | 4                              |                           |                           |                                | 40                                     |                           |                                  |                        | 698                                  | 40                                   |                                         |                                 |                                                       | 40                                       | 35.4                       | 1416                                          | 698                                            | 0.72                      | 503                                          |                     | 1918.56                                      | 479.64                             |                                   | 285                                     | 698                                            | 0.77                     | 537.46                         |                                | 527.78             | 9.68                                | 722.92                         | 732.60                           |                               |
| 117              | 1977 | Mneg Mingyou                      | 2               | poor peasant             | 8                     | 1                      | 1                     | 0                       | 1                              |                           |                           |                                | 10                                     |                           |                                  |                        | 206                                  | 10                                   |                                         | 20                              |                                                       | 10                                       | 35.4                       | 354                                           | 186                                            | 0.80                      | 149                                          |                     | 502.8                                        | 502.8                              |                                   | 57                                      | 186                                            | 0.83                     | 154.38                         |                                | 311.45             | -157.07                             | 389.16                         | 232.09                           |                               |
| 118              | 1977 | Xu Peishi                         | 1               | poor peasant             | 24.5                  | 4                      | 2                     | 2                       | 5                              |                           |                           |                                | 50                                     |                           |                                  |                        | 736                                  | 50                                   |                                         | 61                              |                                                       | 50                                       | 35.4                       | 1770                                          | 675                                            | 0.72                      | 486                                          |                     | 2256                                         | 451.2                              |                                   | 228                                     | 675                                            | 0.77                     | 519.75                         |                                | 554.70             | -34.95                              | -673.83                        | -708.78                          |                               |
| 119              | 1977 | Wang Qingchang                    | 2               | poor peasant             | 18                    | 3                      | 1                     | 2                       | 4                              |                           |                           |                                | 40                                     |                           |                                  |                        | 987                                  | 40                                   |                                         | 45                              |                                                       | 40                                       | 35.4                       | 1416                                          | 942                                            | 0.80                      | 754                                          |                     | 2169.6                                       | 542.4                              |                                   | 228                                     | 942                                            | 0.83                     | 781.86                         |                                | 851.10             | -69.24                              | 594.40                         | 525.16                           |                               |
| 120              | 1977 | Wang Qinghai                      | 2               | poor peasant             |                       | 0                      |                       |                         |                                |                           |                           |                                |                                        |                           |                                  |                        |                                      | 0                                    |                                         |                                 |                                                       | 0                                        | 35.4                       | 0                                             | 0                                              | 0.80                      | 0                                            |                     | 0                                            | #DIV/0!                            |                                   | 0                                       | 0                                              | 0.83                     | 0.00                           |                                | 0.00               |                                     | 0.00                           | 0.00                             |                               |
| 121              | 1977 | Cao Desheng                       | 2               | poor peasant             |                       | 0                      |                       |                         |                                |                           |                           |                                |                                        |                           |                                  |                        |                                      | 0                                    |                                         |                                 |                                                       | 0                                        | 35.4                       | 0                                             | 0                                              | 0.80                      | 0                                            |                     | 0                                            | #DIV/0!                            |                                   | 0                                       | 0                                              | 0.83                     | 0.00                           |                                | 0.00               |                                     | 0.00                           | 0.00                             |                               |
| 122              | 1977 | Ma Yuying                         | 2               | poor peasant             |                       | 0                      |                       |                         | 2                              |                           |                           |                                | 20                                     |                           |                                  |                        | 22                                   | 20                                   |                                         |                                 |                                                       | 20                                       | 35.4                       | 708                                           | 22                                             | 0.80                      | 18                                           |                     | 725.6                                        | 362.8                              |                                   | 114                                     | 22                                             | 0.83                     | 18.26                          | 90                             | 131.13             | -22.87                              | -327.63                        | -350.50                          |                               |
| 123              | 1977 | Liu Peizhen                       | 2               | poor peasant             |                       | 0                      |                       |                         |                                |                           |                           |                                |                                        |                           |                                  |                        |                                      | 0                                    |                                         |                                 |                                                       | 0                                        | 35.4                       | 0                                             | 0                                              | 0.80                      | 0                                            |                     | 0                                            | #DIV/0!                            |                                   | 0                                       | 0                                              | 0.83                     | 0.00                           |                                | 0.00               |                                     | 0.00                           | 0.00                             |                               |
| 124              | 1977 | Liu Dahai                         | 2               | middle-class peasant     | 16.5                  | 3                      | 1                     | 2                       | 6                              |                           |                           |                                | 54                                     |                           |                                  |                        | 722                                  | 54                                   |                                         | 41                              |                                                       | 54                                       | 35.4                       | 1912                                          | 681                                            | 0.80                      | 545                                          |                     | 2456.4                                       | 409.4                              |                                   | 342                                     | 681                                            | 0.83                     | 565.23                         |                                | 614.13             | -48.90                              | 214.68                         | 165.78                           |                               |
| 125              | 1977 | Liu Ercan                         | 2               | middle-class peasant     |                       | 0                      |                       |                         | 2                              |                           |                           |                                | 20                                     |                           |                                  |                        | 52                                   | 20                                   |                                         |                                 |                                                       | 20                                       | 35.4                       | 708                                           | 52                                             | 0.80                      | 42                                           |                     | 749.6                                        | 374.8                              |                                   | 114                                     | 52                                             | 0.83                     | 43.16                          |                                | 218.53             | -175.37                             | -1365.72                       | -1541.09                         |                               |
| 126              | 1977 | Wu Jingxiang                      | 2               | low-middle-class peasant | 4                     | 1                      | 0                     | 1                       | 2                              |                           |                           |                                | 20                                     |                           |                                  |                        | 109                                  | 20                                   |                                         | 10                              |                                                       | 20                                       | 35.4                       | 708                                           | 99                                             | 0.80                      | 79                                           |                     | 787.2                                        | 393.6                              |                                   | 114                                     | 99                                             | 0.83                     | 82.17                          |                                | 165.17             | -83.00                              | -285.14                        | -368.14                          |                               |
| 127              | 1977 | Zhang Hengde                      | 2               | poor peasant             | 17                    | 4                      | 1                     | 3                       | 6                              |                           |                           |                                | 60                                     |                           |                                  |                        | 968                                  | 60                                   |                                         | 48                              |                                                       | 60                                       | 35.4                       | 2124                                          | 920                                            | 0.80                      | 736                                          |                     | 2860                                         | 476.6666667                        |                                   | 399                                     | 920                                            | 0.83                     | 763.60                         |                                | 885.13             | -121.53                             | 1243.99                        | 1122.46                          |                               |
| 128              | 1977 | Zhang Hengde                      | 2               | poor peasant             | 8                     | 1                      | 1                     | 0                       | 1                              |                           |                           |                                | 10                                     |                           |                                  |                        | 315                                  | 10                                   |                                         | 20                              |                                                       | 10                                       | 35.4                       | 354                                           | 295                                            | 0.80                      | 236                                          |                     | 590                                          | 590                                |                                   | 57                                      | 295                                            | 0.83                     | 244.85                         |                                | 263.68             | -18.83                              | 460.99                         | 442.16                           |                               |
| 129              | 1977 | Wei Zhaoxiang                     | 2               | low-middle-class peasant |                       | 0                      |                       |                         |                                |                           |                           |                                |                                        |                           |                                  |                        |                                      | 0                                    |                                         |                                 |                                                       | 0                                        | 35.4                       | 0                                             | 0                                              | 0.80                      | 0                                            |                     | 0                                            | #DIV/0!                            |                                   | 0                                       | 0                                              | 0.83                     | 0.00                           |                                | 0.00               |                                     | 0.00                           | 0.00                             |                               |
| 130              | 1977 | Mu Zhaoren                        | 2               | poor peasant             | 24                    | 3                      | 2                     | 1                       | 7                              |                           |                           |                                | 70                                     |                           |                                  |                        | 1015                                 | 70                                   |                                         | 60                              |                                                       | 70                                       | 35.4                       | 2478                                          | 955                                            | 0.80                      | 764                                          |                     | 3242                                         | 463.1428571                        |                                   | 399                                     | 955                                            | 0.83                     | 792.65                         |                                | 801.22             | -8.57                               | -145.03                        | -153.60                          |                               |
| 131              | 1977 | Li Shiyin                         | 2               | poor peasant             |                       | 0                      |                       |                         | 2                              |                           |                           |                                | 20                                     |                           |                                  |                        | 281                                  | 20                                   |                                         |                                 |                                                       | 20                                       | 35.4                       | 708                                           | 281                                            | 0.80                      | 225                                          |                     | 932.8                                        | 466.4                              |                                   | 114                                     | 281                                            | 0.83                     | 233.23                         |                                | 211.74             | 21.49                               | 287.58                         | 309.07                           |                               |
| 132              | 1977 | Wu Jinggui                        | 1               | low-middle-class peasant | 14.5                  | 3                      | 1                     | 2                       | 5                              |                           |                           |                                | 50                                     |                           |                                  |                        | 874                                  | 50                                   |                                         | 36                              |                                                       | 50                                       | 35.4                       | 1770                                          | 838                                            | 0.72                      | 603                                          |                     | 2373.36                                      | 474.672                            |                                   | 285                                     | 838                                            | 0.77                     | 645.26                         |                                | 859.32             | -214.06                             | 1015.32                        | 801.26                           |                               |
| 133              | 1977 | Wu Jingfang                       | 2               | middle-class peasant     |                       | 0                      |                       |                         |                                |                           |                           |                                |                                        |                           |                                  |                        |                                      | 0                                    |                                         |                                 |                                                       | 0                                        | 35.4                       | 0                                             | 0                                              | 0.80                      | 0                                            |                     | 0                                            | #DIV/0!                            |                                   | 0                                       | 0                                              | 0.83                     | 0.00                           |                                | 0.00               |                                     | 0.00                           | 0.00                             |                               |
| 134              | 1977 | Wu Jingyu                         | 2               | low-middle-class peasant | 20.5                  | 3                      | 2                     | 1                       | 6                              |                           |                           |                                | 60                                     |                           |                                  |                        | 993                                  | 60                                   |                                         | 51                              |                                                       | 60                                       | 35.4                       | 2124                                          | 942                                            | 0.80                      | 754                                          |                     | 2877.6                                       | 479.6                              |                                   | 342                                     | 942                                            | 0.83                     | 781.86                         |                                | 869.80             | -87.94                              | 754.27                         | 666.33                           |                               |
| 135              | 1977 | Wu Jinghua                        | 2               | low-middle-class peasant | 24                    | 3                      | 2                     | 1                       | 5                              |                           |                           |                                | 50                                     |                           |                                  |                        | 835                                  | 50                                   |                                         | 60                              |                                                       | 50                                       | 35.4                       | 1770                                          | 775                                            | 0.80                      | 620                                          |                     | 2390                                         | 478                                |                                   | 285                                     | 775                                            | 0.83                     | 643.25                         |                                | 690.00             | -46.75                              | 594.22                         | 547.47                           |                               |

(cont.)

| Household number | Year | Name of the head of the household | Production team | Class status (1)           | Basic work points (2) | Total labor forces (3) | Male labor forces (4) | Female labor forces (5) | Total household population (6) | Age: 1 to 3 years old (7) | Age: 4 to 7 years old (8) | Age: 8 years old and above (9) | Work points of grain distribution (10) | Laboring work points (11) | Farmyard manure work points (12) | Total work points (13) | Work points of compulsory labor (14) | Work points of help cultivation (15) | Work points of private plots labor (16) | Total deducted work points (17) | Acutal workdays of participation in distribution (18) | Workpoints for rations distribution (19) | Rations per workpoint (20) | Total rations received form distribution (21) | Workdays of participation in distribu-tion (22) | Grains per workpoint (23) | Total grains distributed by work-points (24) | Grains subsidy (25) | Total Grains received from distribution (26) | Distributed grains per person (27) | Distributed grains per adult (28) | Grains received from privated plots (29) | Workdays of participation in distribution (30) | Value per workpoint (31) | Total value of workpoints (32) | Money used for investment (33) | Sum of income | Money distributed in this year (34) | Deposit/ debt of this year (35) | Deposit/ debt over the years (36) | Accumulated deposit/debt (37) |
|------------------|------|-----------------------------------|-----------------|----------------------------|-----------------------|------------------------|-----------------------|-------------------------|--------------------------------|---------------------------|---------------------------|--------------------------------|----------------------------------------|---------------------------|----------------------------------|------------------------|--------------------------------------|--------------------------------------|-----------------------------------------|---------------------------------|-------------------------------------------------------|------------------------------------------|----------------------------|-----------------------------------------------|-------------------------------------------------|---------------------------|----------------------------------------------|---------------------|----------------------------------------------|------------------------------------|-----------------------------------|------------------------------------------|------------------------------------------------|--------------------------|--------------------------------|--------------------------------|---------------|-------------------------------------|---------------------------------|-----------------------------------|-------------------------------|
| 136              | 1977 | Wu Changbiao                      | 2               | middle-class peasant       |                       | 0                      |                       |                         |                                |                           |                           |                                |                                        |                           |                                  |                        | 0                                    |                                      |                                         |                                 | 0                                                     | 35.4                                     | 0                          | 0                                             | 0.80                                            | 0                         |                                              | 0                   | #DIV/o!                                      |                                    | 0                                 | 0                                        | 0.83                                           | 0.00                     |                                |                                |               | 0.00                                | 0.00                            |                                   |                               |
| 137              | 1977 | Wu Jingnan                        | 2               | middle-class peasant       | 12                    | 3                      | 2                     | 1                       | 8                              |                           |                           |                                | 76                                     |                           |                                  |                        | 882                                  | 76                                   |                                         | 30                              |                                                       | 76                                       | 35.4                       | 2690                                          | 852                                             | 0.80                      | 682                                          |                     | 3372                                         | 421.5                              |                                   | 456                                      | 852                                            | 0.83                     | 707.16                         |                                |               | 956.28                              | -249.12                         | -429.93                           | -679.05                       |
| 138              | 1977 | Wu Jing'an                        | 2               | middle-class peasant       | 10                    | 1                      | 1                     | 0                       | 2                              |                           |                           |                                | 20                                     |                           |                                  |                        | 286                                  | 20                                   |                                         | 25                              |                                                       | 20                                       | 35.4                       | 708                                           | 261                                             | 0.80                      | 209                                          |                     | 916.8                                        | 458.4                              |                                   | 114                                      | 261                                            | 0.83                     | 216.63                         |                                |               | 232.98                              | -16.35                          | 114.97                            | 98.62                         |
| 139              | 1977 | Wu Jinghui                        | 2               | middle-class peasant       | 14                    | 2                      | 1                     | 1                       | 6                              |                           |                           |                                | 58                                     |                           |                                  |                        | 681                                  | 58                                   |                                         | 35                              |                                                       | 58                                       | 35.4                       | 2053                                          | 646                                             | 0.80                      | 517                                          |                     | 2570                                         | 428.3333333                        |                                   | 342                                      | 646                                            | 0.83                     | 536.18                         |                                |               | 584.99                              | -48.81                          | 82.26                             | 33.45                         |
| 140              | 1977 | Wu Jingying                       | 2               | middle-class peasant       | 18                    | 3                      | 1                     | 2                       | 9                              |                           |                           |                                | 88                                     |                           |                                  |                        | 830                                  | 88                                   |                                         | 45                              |                                                       | 88                                       | 35.4                       | 3115                                          | 785                                             | 0.80                      | 628                                          |                     | 3743.2                                       | 415.9111111                        |                                   | 513                                      | 785                                            | 0.83                     | 651.55                         | 125                            |               | 796.98                              | -20.43                          | -112.98                           | -133.41                       |
| 141              | 1977 | Wu Jingfu                         | 2               | middle-class peasant       | 14                    | 2                      | 1                     | 1                       | 6                              |                           |                           |                                | 58                                     |                           |                                  |                        | 592                                  | 58                                   |                                         | 35                              |                                                       | 58                                       | 35.4                       | 2053                                          | 557                                             | 0.80                      | 446                                          |                     | 2498.8                                       | 416.4666667                        |                                   | 342                                      | 557                                            | 0.83                     | 462.31                         |                                |               | 637.80                              | -175.49                         | -257.32                           | -432.81                       |
| 142              | 1977 | Meng Dongmei                      | 2               | low-middle-class peasant   | 4                     | 1                      | 0                     | 1                       | 5                              |                           |                           |                                | 48                                     |                           |                                  |                        | 131                                  | 48                                   |                                         | 10                              |                                                       | 48                                       | 35.4                       | 1699                                          | 121                                             | 0.80                      | 97                                           |                     | 1796                                         | 359.2                              |                                   | 285                                      | 121                                            | 0.83                     | 100.43                         | 200                            |               | 328.02                              | -27.59                          | -84.18                            | -111.77                       |
| 143              | 1977 | Mneg Tianyu                       | 2               | poor peasant               | 16.5                  | 3                      | 1                     | 2                       | 5                              |                           |                           |                                | 50                                     |                           |                                  |                        | 886                                  | 50                                   |                                         | 41                              |                                                       | 50                                       | 35.4                       | 1770                                          | 845                                             | 0.80                      | 676                                          |                     | 2446                                         | 489.2                              |                                   | 285                                      | 845                                            | 0.83                     | 701.35                         |                                |               | 603.95                              | 97.40                           | 817.74                            | 915.14                        |
| 144              | 1977 | Xue Lanying                       | 2               | middle-class peasant       |                       | 0                      |                       |                         |                                |                           |                           |                                |                                        |                           |                                  |                        |                                      |                                      |                                         |                                 | 0                                                     | 35.4                                     | 0                          | 0                                             | 0.80                                            | 0                         |                                              | 0                   | #DIV/o!                                      |                                    | 0                                 | 0                                        | 0.83                                           | 0.00                     |                                |                                | 0.00          | 0.00                                |                                 | 0.00                              |                               |
| 145              | 1977 | Wang Shufu                        | 2               | poor peasant               | 14                    | 2                      | 1                     | 1                       | 4                              |                           |                           |                                | 34                                     |                           |                                  |                        | 526                                  | 34                                   |                                         | 35                              |                                                       | 34                                       | 35.4                       | 1204                                          | 491                                             | 0.80                      | 393                                          |                     | 1596.4                                       | 399.1                              |                                   | 228                                      | 491                                            | 0.83                     | 407.53                         |                                |               | 447.18                              | -39.65                          | 474.87                            | 435.22                        |
| 146              | 1977 | Li Changsheng                     | 2               | poor peasant               | 4                     | 2                      | 1                     | 1                       | 6                              |                           |                           |                                | 60                                     |                           |                                  |                        | 762                                  | 60                                   |                                         | 10                              |                                                       | 60                                       | 35.4                       | 2124                                          | 752                                             | 0.80                      | 602                                          |                     | 2725.6                                       | 454.2666667                        |                                   | 342                                      | 752                                            | 0.83                     | 624.16                         |                                |               | 661.46                              | -37.30                          | 333.71                            | 296.41                        |
| 147              | 1977 | Zhang Yongqing                    | 2               | poor peasant               |                       | 0                      |                       |                         | 1                              |                           |                           |                                | 10                                     |                           |                                  |                        | 206                                  | 10                                   |                                         |                                 |                                                       | 10                                       | 35.4                       | 354                                           | 206                                             | 0.80                      | 165                                          |                     | 518.8                                        | 518.8                              |                                   | 57                                       | 206                                            | 0.83                     | 170.98                         |                                |               | 162.35                              | 8.63                            | 509.42                            | 518.05                        |
| 148              | 1977 | Wang Suzhen                       | 2               | poor peasant               |                       | 0                      |                       |                         | 1                              |                           |                           |                                | 10                                     |                           |                                  |                        | 9                                    | 10                                   |                                         |                                 |                                                       | 10                                       | 35.4                       | 354                                           | 9                                               | 0.80                      | 7                                            |                     | 361.2                                        | 361.2                              |                                   | 57                                       | 9                                              | 0.83                     | 7.47                           |                                |               | 87.88                               | -80.41                          | -782.46                           | -862.87                       |
| 149              | 1977 | Liu Chunxiang                     | 2               | upper-middle-class peasant | 14.5                  | 3                      | 1                     | 2                       | 3                              |                           |                           |                                | 30                                     |                           |                                  |                        | 740                                  | 30                                   |                                         | 36                              |                                                       | 30                                       | 35.4                       | 1062                                          | 704                                             | 0.80                      | 563                                          |                     | 1625.2                                       | 541.7333333                        |                                   | 171                                      | 704                                            | 0.83                     | 584.32                         |                                |               | 614.50                              | -30.18                          | 1648.43                           | 1618.25                       |
| 150              | 1977 | Liu Chunyou                       | 2               | low-middle-class peasant   |                       | 0                      |                       |                         |                                |                           |                           |                                |                                        |                           |                                  |                        |                                      | 0                                    |                                         |                                 |                                                       | 0                                        | 35.4                       | 0                                             | 0                                               | 0.80                      | 0                                            |                     | 0                                            | #DIV/o!                            |                                   | 0                                        | 0                                              | 0.83                     | 0.00                           |                                |               | 0.00                                | 0.00                            |                                   | 0.00                          |
| 151              | 1977 | Wang Kaitai                       | 2               | middle-class peasant       | 14                    | 2                      | 1                     | 1                       | 7                              |                           |                           |                                | 64                                     |                           |                                  |                        | 402                                  | 64                                   |                                         | 35                              |                                                       | 64                                       | 35.4                       | 2266                                          | 367                                             | 0.80                      | 294                                          |                     | 2559.2                                       | 365.6                              |                                   | 399                                      | 367                                            | 0.83                     | 304.61                         |                                |               | 621.42                              | -316.81                         | -525.80                           | -842.61                       |
| 152              | 1977 | Meng Minghuan                     | 2               | middle-class peasant       |                       | 0                      |                       |                         | 2                              |                           |                           |                                | 20                                     |                           |                                  |                        |                                      | 20                                   |                                         |                                 |                                                       | 20                                       | 35.4                       | 708                                           | 0                                               | 0.80                      | 0                                            |                     | 708                                          | 354                                |                                   | 114                                      | 0                                              | 0.83                     | 0.00                           |                                |               | 130.42                              | -130.42                         | -226.84                           | -357.26                       |
| 153              | 1977 | Meng Qingfu                       | 2               | middle-class peasant       | 10                    | 1                      | 1                     | 0                       | 1                              |                           |                           |                                | 10                                     |                           |                                  |                        | 380                                  | 10                                   |                                         | 25                              |                                                       | 10                                       | 35.4                       | 354                                           | 355                                             | 0.80                      | 284                                          |                     | 638                                          | 638                                |                                   | 57                                       | 355                                            | 0.83                     | 294.65                         |                                |               | 297.15                              | -2.50                           | 915.26                            | 912.76                        |

(cont.)

| Household number | Year | Name of the head of the household | Production team | Class status (1)           | Basic work points (2) | Total labor forces (3) | Male labor forces (4) | Female labor forces (5) | Total household population (6) | Age: 1 to 3 years old (7) | Age: 4 to 7 years old (8) | Age: 8 years old and above (9) | Work points of grain distribution (10) | Laboring work points (11) | Farmyard manure work points (12) | Total work points (13) | Work points of compulsory labor (14) | Work points of help cultivation (15) | Work points of private plots labor (16) | Total deducted work points (17) | Actual workdays of participation in distribution (18) | Workpoints for rations distribution (19) | Rations per workpoint (20) | Total rations received from distribution (21) | Workdays of participation in distribution (22) | Grains per workpoint (23) | Total grains distributed by work-points (24) | Grains subsidy (25) | Total Grains received from distribution (26) | Distributed grains per person (27) | Distributed grains per adult (28) | Grains received from private plots (29) | Workdays of participation in distribution (30) | Value per workpoint (31) | Total value of workpoints (32) | Money used for investment (33) | Sum of income (34) | Money distributed in this year (34) | Deposit/debt of this year (35) | Deposit/debt over the years (36) | Accumulated deposit/debt (37) |
|------------------|------|-----------------------------------|-----------------|----------------------------|-----------------------|------------------------|-----------------------|-------------------------|--------------------------------|---------------------------|---------------------------|--------------------------------|----------------------------------------|---------------------------|----------------------------------|------------------------|--------------------------------------|--------------------------------------|-----------------------------------------|---------------------------------|-------------------------------------------------------|------------------------------------------|----------------------------|-----------------------------------------------|------------------------------------------------|---------------------------|----------------------------------------------|---------------------|----------------------------------------------|------------------------------------|-----------------------------------|-----------------------------------------|------------------------------------------------|--------------------------|--------------------------------|--------------------------------|--------------------|-------------------------------------|--------------------------------|----------------------------------|-------------------------------|
| 154              | 1977 | Mneg Qingsheng                    | 2               | middle-class peasant       | 10                    | 1                      | 1                     | 0                       | 1                              |                           |                           |                                | 10                                     |                           |                                  | 407                    | 10                                   |                                      |                                         | 25                              |                                                       | 10                                       | 35.4                       | 354                                           | 382                                            | 0.80                      | 306                                          |                     | 659.6                                        | 659.6                              |                                   | 57                                      | 382                                            | 0.83                     | 317.06                         |                                |                    | 348.52                              | -31.46                         | 556.30                           | 524.84                        |
| 155              | 1977 | Meng Qingbao                      | 2               | middle-class peasant       | 10                    | 1                      | 1                     | 0                       | 2                              |                           |                           |                                | 20                                     |                           |                                  | 202                    | 20                                   |                                      |                                         | 25                              |                                                       | 20                                       | 35.4                       | 708                                           | 177                                            | 0.80                      | 142                                          |                     | 849.6                                        | 424.8                              |                                   | 114                                     | 177                                            | 0.83                     | 146.91                         | 30                             |                    | 301.85                              | -124.94                        | -26.29                           | -151.23                       |
| 156              | 1977 | Cao Jincheng                      | 2               | poor peasant               | 14                    | 2                      | 1                     | 1                       | 3                              |                           |                           |                                | 26                                     |                           |                                  | 182                    | 26                                   |                                      |                                         | 35                              |                                                       | 26                                       | 35.4                       | 860                                           | 147                                            | 0.80                      | 118                                          |                     | 977.6                                        | 325.8666667                        |                                   | 57                                      | 147                                            | 0.83                     | 122.01                         |                                |                    | 366.39                              | -244.38                        | 173.42                           | -70.96                        |
| 157              | 1977 | Cao Jinwei                        | 2               | poor peasant               | 10                    | 1                      | 1                     | 0                       | 2                              |                           |                           |                                | 20                                     |                           |                                  | 396                    | 20                                   |                                      |                                         | 25                              |                                                       | 20                                       | 35.4                       | 708                                           | 371                                            | 0.80                      | 297                                          |                     | 1004.8                                       | 502.4                              |                                   | 114                                     | 371                                            | 0.83                     | 307.93                         |                                |                    | 255.31                              | 52.62                          | 460.69                           | 513.31                        |
| 158              | 1977 | Meng Tianlai                      | 2               | middle-class peasant       | 14                    | 2                      | 1                     | 1                       | 5                              |                           |                           |                                | 46                                     |                           |                                  | 693                    | 46                                   |                                      |                                         | 35                              |                                                       | 46                                       | 35.4                       | 1628                                          | 658                                            | 0.80                      | 526                                          |                     | 2154.8                                       | 430.96                             |                                   | 285                                     | 658                                            | 0.83                     | 546.14                         |                                |                    | 585.64                              | -39.50                         | 317.61                           | 278.11                        |
| 159              | 1977 | Yu Guiying                        | 1               | poor peasant               |                       | 0                      |                       |                         |                                |                           |                           |                                |                                        |                           |                                  |                        | 0                                    |                                      |                                         |                                 |                                                       | 0                                        | 35.4                       | 0                                             | 0                                              | 0.72                      | 0                                            |                     | 0                                            | #DIV/0!                            |                                   | 0                                       | 0                                              | 0.77                     | 0.00                           |                                |                    | 0.00                                |                                | 0.00                             |                               |
| 160              | 1977 | Liu Chunxiao                      | 2               | upper-middle-class peasant | 14                    | 2                      | 1                     | 1                       | 5                              |                           |                           |                                | 44                                     |                           |                                  | 564                    | 44                                   |                                      |                                         | 35                              |                                                       | 44                                       | 35.4                       | 1558                                          | 529                                            | 0.80                      | 423                                          |                     | 1980.8                                       | 396.16                             |                                   | 285                                     | 529                                            | 0.83                     | 439.07                         |                                |                    | 625.28                              | -186.21                        | 406.96                           | 220.75                        |
| 161              | 1977 | Meng Qinghua                      | 2               | low-middle-class peasant   | 8                     | 1                      | 1                     | 0                       | 1                              |                           |                           |                                | 10                                     |                           |                                  | 121                    | 10                                   |                                      |                                         | 20                              |                                                       | 10                                       | 35.4                       | 354                                           | 101                                            | 0.80                      | 81                                           |                     | 434.8                                        | 434.8                              |                                   | 57                                      | 101                                            | 0.83                     | 83.83                          |                                |                    | 126.57                              | -42.74                         | 200.33                           | 157.59                        |
| 162              | 1977 | Meng Peigui                       | 2               | rich peasant               |                       |                        |                       |                         |                                |                           |                           |                                |                                        |                           |                                  |                        | 0                                    |                                      |                                         |                                 |                                                       | 0                                        | 35.4                       | 0                                             | 0                                              | 0.80                      | 0                                            |                     | 0                                            | #DIV/0!                            |                                   | 0                                       | 0                                              | 0.83                     | 0.00                           |                                |                    | 0.00                                |                                | 0.00                             |                               |
| 163              | 1977 | Meng Peiji                        | 2               | rich peasant               | 34.5                  | 5                      | 3                     | 2                       | 7                              |                           |                           |                                | 70                                     |                           |                                  | 1297                   | 70                                   |                                      |                                         | 111                             |                                                       | 70                                       | 35.4                       | 2478                                          | 1186                                           | 0.80                      | 949                                          |                     | 3426.8                                       | 489.5428571                        |                                   | 399                                     | 1186                                           | 0.83                     | 984.38                         |                                |                    | 832.96                              | 151.42                         | 676.25                           | 827.67                        |
| 164              | 1977 | Meng Jinghuan                     | 2               | upper-middle-class peasant | 4                     | 1                      | 0                     | 1                       | 5                              |                           |                           |                                | 44                                     |                           |                                  | 71                     | 44                                   |                                      |                                         | 10                              |                                                       | 44                                       | 35.4                       | 1522                                          | 61                                             | 0.80                      | 49                                           |                     | 1570.8                                       | 314.16                             |                                   | 228                                     | 61                                             | 0.83                     | 50.63                          | 35                             |                    | 273.98                              | -188.35                        | 116.87                           | -71.48                        |
| 165              | 1977 | Lan Jinzhi                        | 1               | poor peasant               |                       | 0                      |                       |                         |                                |                           |                           |                                |                                        |                           |                                  |                        | 0                                    |                                      |                                         |                                 |                                                       | 0                                        | 35.4                       | 0                                             | 0                                              | 0.72                      | 0                                            |                     | 0                                            | #DIV/0!                            |                                   | 0                                       | 0                                              | 0.77                     | 0.00                           |                                |                    | 0.00                                |                                | 0.00                             |                               |
| 166              | 1977 | Wang Jinshu                       | 2               | upper-middle-class peasant |                       | 0                      |                       |                         |                                |                           |                           |                                |                                        |                           |                                  |                        | 0                                    |                                      |                                         |                                 |                                                       | 0                                        | 35.4                       | 0                                             | 0                                              | 0.80                      | 0                                            |                     | 0                                            | #DIV/0!                            |                                   | 0                                       | 0                                              | 0.83                     | 0.00                           |                                |                    | 0.00                                |                                | 0.00                             |                               |
| 167              | 1977 | Cao Xiangyun                      | 2               | upper-middle-class peasant |                       | 0                      |                       |                         |                                |                           |                           |                                |                                        |                           |                                  |                        | 0                                    |                                      |                                         |                                 |                                                       | 0                                        | 35.4                       | 0                                             | 0                                              | 0.80                      | 0                                            |                     | 0                                            | #DIV/0!                            |                                   | 0                                       | 0                                              | 0.83                     | 0.00                           |                                |                    | 0.00                                |                                | 0.00                             |                               |
| 168              | 1977 | Li Shibao                         | 2               | poor peasant               | 30                    | 5                      | 2                     | 3                       | 10                             | 1                         | 1                         | 8                              | 94                                     |                           |                                  | 1402                   | 94                                   |                                      |                                         | 75                              |                                                       | 94                                       | 35.4                       | 3328                                          | 1327                                           | 0.80                      | 1062                                         |                     | 4389.2                                       | 438.92                             |                                   | 570                                     | 1327                                           | 0.83                     | 1101.41                        |                                |                    | 917.49                              | 183.92                         | -418.17                          | -234.25                       |
| 169              | 1977 | Wang Kailu                        | 2               | poor peasant               | 22                    | 3                      | 2                     | 1                       | 4                              |                           |                           |                                | 40                                     |                           |                                  | 855                    | 40                                   |                                      |                                         | 55                              |                                                       | 40                                       | 35.4                       | 1416                                          | 800                                            | 0.80                      | 640                                          |                     | 2056                                         | 514                                |                                   | 228                                     | 800                                            | 0.83                     | 664.00                         |                                |                    | 863.64                              | -199.64                        | 607.97                           | 408.33                        |
| 170              | 1977 | Zhao Hongrui                      | 1               | middle-class peasant       | 38.5                  | 6                      | 3                     | 3                       | 8                              |                           | 2                         | 6                              | 78                                     |                           |                                  | 1436                   | 78                                   |                                      |                                         | 96                              |                                                       | 78                                       | 35.4                       | 2761                                          | 1340                                           | 0.72                      | 965                                          |                     | 3726                                         | 465.75                             |                                   | 456                                     | 1340                                           | 0.77                     | 1031.80                        |                                |                    | 1216.98                             | -185.18                        | 1327.45                          | 1142.27                       |
| 171              | 1977 | Fang Chunxing                     | 0               | middle-class peasant       |                       | 0                      |                       |                         |                                |                           |                           |                                |                                        |                           |                                  |                        | 0                                    |                                      |                                         |                                 |                                                       | 0                                        | 35.4                       | 0                                             | 0                                              | 0.72                      | 0                                            |                     | 0                                            | #DIV/0!                            |                                   | 0                                       | 0                                              | 0.77                     | 0.00                           |                                |                    | 0.00                                |                                | 0.00                             |                               |
| 172              | 1977 | Zhao Honglin                      | 2               | middle-class peasant       |                       | 0                      |                       |                         |                                |                           |                           |                                |                                        |                           |                                  |                        | 0                                    |                                      |                                         |                                 |                                                       | 0                                        | 35.4                       | 0                                             | 0                                              | 0.80                      | 0                                            |                     | 0                                            | #DIV/0!                            |                                   | 0                                       | 0                                              | 0.83                     | 0.00                           |                                |                    | 0.00                                |                                | 0.00                             |                               |
| 173              | 1977 | Yu Jinquan                        | 0               | poor peasant               |                       | 0                      |                       |                         |                                |                           |                           |                                |                                        |                           |                                  |                        | 0                                    |                                      |                                         |                                 |                                                       | 0                                        | 35.4                       | 0                                             | 0                                              | 0.72                      | 0                                            |                     | 0                                            | #DIV/0!                            |                                   | 0                                       | 0                                              | 0.77                     | 0.00                           |                                |                    | 0.00                                |                                | 0.00                             |                               |
| 174              | 1977 | Yu Jinliang                       | 0               | poor peasant               |                       | 0                      |                       |                         |                                |                           |                           |                                |                                        |                           |                                  |                        | 0                                    |                                      |                                         |                                 |                                                       | 0                                        | 35.4                       | 0                                             | 0                                              | 0.72                      | 0                                            |                     | 0                                            | #DIV/0!                            |                                   | 0                                       | 0                                              | 0.77                     | 0.00                           |                                |                    | 0.00                                |                                | 0.00                             |                               |

(cont.)

| Household number | Year | Name of the head of the household | Production team | Class status (1)         | Basic work points (2) | Total labor forces (3) | Male labor forces (4) | Female labor forces (5) | Total household population (6) | Age: 1 to 3 years old (7) | Age: 4 to 7 years old (8) | Age: 8 years old and above (9) | Work points of grain distribution (10) | Laboring work points (11) | Farmyard manure work points (12) | Total work points (13) | Work points of compulsory labor (14) | Work points of help cultivation (15) | Work points of private plots labor (16) | Total deducted work points (17) | Acutal workdays of participation in distribution (18) | Workpoints for rations distribution (19) | Rations per workpoint (20) | Total rations received form distribution (21) | Workdays of participation in distribu-tion (22) | Grains per workpoint (23) | Total grains distributed by work-points (24) | Grains subsidy (25) | Total Grains received from distribution (26) | Distributed grains per person (27) | Distributed grains per adult (28) | Grains received from privated plots (29) | Workdays of participation in distribution (30) | Value per workpoint (31) | Total value of workpoints (32) | Money used for investment (33) | Sum of income (34) | Money distributed in this year (34) | Deposit/ debt of this year (35) | Deposit/ debt over the years (36) | Accumulated deposit/debt (37) |
|------------------|------|-----------------------------------|-----------------|--------------------------|-----------------------|------------------------|-----------------------|-------------------------|--------------------------------|---------------------------|---------------------------|--------------------------------|----------------------------------------|---------------------------|----------------------------------|------------------------|--------------------------------------|--------------------------------------|-----------------------------------------|---------------------------------|-------------------------------------------------------|------------------------------------------|----------------------------|-----------------------------------------------|-------------------------------------------------|---------------------------|----------------------------------------------|---------------------|----------------------------------------------|------------------------------------|-----------------------------------|------------------------------------------|------------------------------------------------|--------------------------|--------------------------------|--------------------------------|--------------------|-------------------------------------|---------------------------------|-----------------------------------|-------------------------------|
| 175              | 1977 | Mu Zhaoxin                        | 2               | poor peasant             | 4                     | 1                      | 0                     | 1                       | 4                              |                           |                           |                                | 34                                     |                           |                                  |                        | 34                                   |                                      |                                         | 10                              |                                                       | 34                                       | 35.4                       | 1204                                          | 357                                             | 0.80                      | 286                                          | 1489.2              | 372.3                                        |                                    | 228                               | 357                                      | 0.83                                           | 296.31                   | 30                             | 257.33                         | 68.98              | -71.29                              | -2.31                           |                                   |                               |
| 176              | 1977 | Wang Guijing                      | 0               | poor peasant             |                       | 0                      |                       |                         |                                |                           |                           |                                |                                        |                           |                                  |                        | 0                                    |                                      |                                         |                                 |                                                       | 0                                        | 35.4                       | 0                                             | 0                                               | 0.72                      | 0                                            | 0                   | #DIV/0!                                      |                                    | 0                                 | 0                                        | 0.77                                           | 0.00                     |                                | 0.00                           |                    | 0.00                                |                                 | 0.00                              |                               |
| 177              | 1977 | Zhang Xuezhong                    | 1               | low-middle-class peasant | 24.5                  | 5                      | 1                     | 4                       | 9                              |                           |                           |                                | 90                                     |                           |                                  |                        | 1262                                 | 90                                   |                                         | 61                              |                                                       | 90                                       | 35.4                       | 3186                                          | 1201                                            | 0.72                      | 865                                          | 4050.72             | 450.08                                       |                                    | 513                               | 1201                                     | 0.77                                           | 924.77                   |                                | 859.16                         | 65.61              | -888.20                             | -822.59                         |                                   |                               |
| 178              | 1977 | Jia Anji                          | 2               | poor peasant             | 18                    | 3                      | 1                     | 2                       | 7                              |                           |                           |                                | 64                                     |                           |                                  |                        | 840                                  | 64                                   |                                         | 45                              |                                                       | 64                                       | 35.4                       | 2266                                          | 795                                             | 0.80                      | 636                                          | 2901.6              | 414.5142857                                  |                                    | 342                               | 795                                      | 0.83                                           | 659.85                   |                                | 755.87                         | -96.02             | 324.81                              | 228.79                          |                                   |                               |
| 179              | 1977 | Liu Peishou                       | 1               | middle-class peasant     | 14                    | 2                      | 1                     | 1                       | 5                              |                           |                           |                                | 50                                     |                           |                                  |                        | 1010                                 | 50                                   |                                         | 35                              |                                                       | 50                                       | 35.4                       | 1770                                          | 975                                             | 0.72                      | 702                                          | 2472                | 494.4                                        |                                    | 285                               | 975                                      | 0.77                                           | 750.75                   |                                | 666.68                         | 84.07              | 1556.63                             | 1640.70                         |                                   |                               |
| 180              | 1977 | Gao Yunxian                       | 2               | middle-class peasant     | 24                    | 3                      | 2                     | 1                       | 6                              |                           |                           |                                | 60                                     |                           |                                  |                        | 819                                  | 60                                   |                                         | 60                              |                                                       | 60                                       | 35.4                       | 2124                                          | 759                                             | 0.80                      | 607                                          | 2731.2              | 455.2                                        |                                    | 342                               | 759                                      | 0.83                                           | 629.97                   |                                | 775.81                         | -145.84            | 665.89                              | 520.05                          |                                   |                               |
| 181              | 1977 | Tian Kehua                        | 2               | middle-class peasant     |                       | 0                      |                       |                         |                                |                           |                           |                                |                                        |                           |                                  |                        | 0                                    |                                      |                                         |                                 |                                                       | 0                                        | 35.4                       | 0                                             | 0                                               | 0.80                      | 0                                            | 0                   | #DIV/0!                                      |                                    | 0                                 | 0                                        | 0.83                                           | 0.00                     |                                | 0.00                           |                    | 0.00                                |                                 | 0.00                              |                               |
| 182              | 1977 | Tian Dawei                        | 1               | middle-class peasant     | 14                    | 2                      | 1                     | 1                       | 7                              |                           |                           |                                | 64                                     |                           |                                  |                        | 444                                  | 64                                   |                                         | 35                              |                                                       | 64                                       | 35.4                       | 2266                                          | 409                                             | 0.72                      | 294                                          | 2560.08             | 365.7257143                                  |                                    | 399                               | 409                                      | 0.77                                           | 314.93                   |                                | 625.33                         | -310.40            | -327.10                             | -637.50                         |                                   |                               |
| 183              | 1977 | Fan Liyuan                        | 2               | middle-class peasant     | 14                    | 2                      | 1                     | 1                       | 4                              |                           |                           |                                | 40                                     |                           |                                  |                        | 948                                  | 40                                   |                                         | 35                              |                                                       | 40                                       | 35.4                       | 1416                                          | 913                                             | 0.80                      | 730                                          | 2146.4              | 536.6                                        |                                    | 228                               | 913                                      | 0.83                                           | 757.79                   |                                | 598.50                         | 159.29             | 714.78                              | 874.07                          |                                   |                               |
| 184              | 1977 | Fan Shutang                       | 1               | middle-class peasant     | 16.5                  | 3                      | 1                     | 2                       | 7                              |                           |                           |                                | 68                                     |                           |                                  |                        | 664                                  | 68                                   |                                         | 41                              |                                                       | 68                                       | 35.4                       | 2407                                          | 623                                             | 0.72                      | 449                                          | 2855.76             | 407.9657143                                  |                                    | 399                               | 623                                      | 0.77                                           | 479.71                   |                                | 682.15                         | -202.44            | -398.05                             | -600.49                         |                                   |                               |
| 185              | 1977 | Fan Chunxiang                     | 1               | middle-class peasant     | 4                     | 1                      | 0                     | 1                       | 5                              |                           |                           |                                | 44                                     |                           |                                  |                        | 167                                  | 44                                   |                                         | 10                              |                                                       | 44                                       | 35.4                       | 1558                                          | 157                                             | 0.72                      | 113                                          | 1670.64             | 334.128                                      |                                    | 285                               | 157                                      | 0.77                                           | 120.89                   | 106                            | 306.44                         | -79.55             | -46.38                              | -125.93                         |                                   |                               |
| 186              | 1977 | Lian Huaizhe                      | 2               | poor peasant             | 8                     | 1                      | 1                     | 0                       | 3                              |                           |                           |                                | 30                                     |                           |                                  |                        | 523                                  | 30                                   |                                         | 20                              |                                                       | 30                                       | 35.4                       | 1062                                          | 503                                             | 0.80                      | 402                                          | 1464.4              | 488.1333333                                  |                                    | 171                               | 503                                      | 0.83                                           | 417.49                   |                                | 436.70                         | -19.21             | 32.74                               | 13.53                           |                                   |                               |
| 187              | 1977 | Lian Wenbing                      | 2               | poor peasant             | 14                    | 2                      | 1                     | 1                       | 6                              |                           |                           |                                | 54                                     |                           |                                  |                        | 569                                  | 54                                   |                                         | 35                              |                                                       | 54                                       | 35.4                       | 1912                                          | 534                                             | 0.80                      | 427                                          | 2338.8              | 389.8                                        |                                    | 342                               | 534                                      | 0.83                                           | 443.22                   |                                | 501.21                         | -57.99             | -67.48                              | -125.47                         |                                   |                               |
| 188              | 1977 | Wu Congyi                         | 1               | poor peasant             | 14                    | 2                      | 1                     | 1                       | 7                              |                           |                           |                                | 68                                     |                           |                                  |                        | 788                                  | 68                                   |                                         | 35                              |                                                       | 68                                       | 35.4                       | 2407                                          | 753                                             | 0.72                      | 542                                          | 2949.36             | 421.3371429                                  |                                    | 399                               | 753                                      | 0.77                                           | 579.81                   |                                | 692.15                         | -112.34            | -926.98                             | -1039.32                        |                                   |                               |
| 189              | 1977 | Wu Laifu                          | 1               | poor peasant             | 14                    | 2                      | 1                     | 1                       | 7                              |                           |                           |                                | 68                                     |                           |                                  |                        | 530                                  | 68                                   |                                         | 35                              |                                                       | 68                                       | 35.4                       | 2407                                          | 495                                             | 0.72                      | 356                                          | 2763.6              | 394.8                                        |                                    | 399                               | 495                                      | 0.77                                           | 381.15                   |                                | 615.49                         | -234.34            | -677.64                             | -911.98                         |                                   |                               |
| 190              | 1977 | Tian Dayu                         | 2               | poor peasant             |                       | 0                      |                       |                         | 1                              |                           |                           |                                | 10                                     |                           |                                  |                        | 365                                  | 10                                   |                                         |                                 |                                                       | 10                                       | 35.4                       | 354                                           | 365                                             | 0.80                      | 292                                          | 646                 | 646                                          |                                    | 57                                | 365                                      | 0.83                                           | 302.95                   |                                | 254.10                         | 48.85              | 468.99                              | 517.84                          |                                   |                               |
| 191              | 1977 | Liu Shuting                       | 2               | poor peasant             | 4                     | 1                      | 0                     | 1                       | 5                              |                           |                           |                                | 48                                     |                           |                                  |                        | 328                                  | 48                                   |                                         | 10                              |                                                       | 48                                       | 35.4                       | 1699                                          | 318                                             | 0.80                      | 254                                          | 1953.6              | 390.72                                       |                                    | 285                               | 318                                      | 0.83                                           | 263.94                   |                                | 348.90                         | -84.96             | 30.74                               | -54.22                          |                                   |                               |
| 192              | 1977 | Meng Tiande                       | 2               | poor peasant             | 14                    | 2                      | 1                     | 1                       | 7                              |                           |                           |                                | 70                                     |                           |                                  |                        | 641                                  | 70                                   |                                         | 35                              |                                                       | 70                                       | 35.4                       | 2478                                          | 606                                             | 0.80                      | 485                                          | 2962.8              | 423.2571429                                  |                                    | 399                               | 606                                      | 0.83                                           | 502.98                   |                                | 792.85                         | -289.87            | -261.21                             | -551.08                         |                                   |                               |
| 193              | 1977 | Meng Xiulian                      | 2               | poor peasant             | 4                     | 1                      | 0                     | 1                       | 2                              |                           |                           |                                | 18                                     |                           |                                  |                        | 71                                   | 18                                   |                                         | 10                              |                                                       | 18                                       | 35.4                       | 637                                           | 61                                              | 0.80                      | 49                                           | 686                 | 343                                          |                                    | 114                               | 61                                       | 0.83                                           | 50.63                    | 40                             | 128.14                         | -37.51             | 18.99                               | -18.52                          |                                   |                               |
| 194              | 1977 | Tian Genlong                      | 2               | poor peasant             | 14                    | 2                      | 1                     | 1                       | 7                              |                           |                           |                                | 64                                     |                           |                                  |                        | 436                                  | 64                                   |                                         | 35                              |                                                       | 64                                       | 35.4                       | 2266                                          | 401                                             | 0.80                      | 321                                          | 2586.4              | 369.4857143                                  |                                    | 456                               | 401                                      | 0.83                                           | 332.83                   |                                | 704.89                         | -372.06            | -879.25                             | -1251.31                        |                                   |                               |
| 195              | 1977 | Zhao Jinlan                       | 2               | poor peasant             | 4                     | 1                      | 0                     | 1                       | 6                              |                           |                           |                                | 58                                     |                           |                                  |                        | 543                                  | 58                                   |                                         | 10                              |                                                       | 58                                       | 35.4                       | 2053                                          | 533                                             | 0.80                      | 426                                          | 2479.6              | 413.2666667                                  |                                    | 342                               | 533                                      | 0.83                                           | 442.39                   |                                | 519.60                         | -77.21             | 16.17                               | -61.04                          |                                   |                               |
| 196              | 1977 | Liu Peiren                        | 2               | middle-class peasant     | 14                    | 2                      | 1                     | 1                       | 5                              |                           |                           |                                | 48                                     |                           |                                  |                        | 347                                  | 48                                   |                                         | 35                              |                                                       | 48                                       | 35.4                       | 1699                                          | 312                                             | 0.80                      | 250                                          | 1948.8              | 389.76                                       |                                    | 285                               | 312                                      | 0.83                                           | 258.96                   |                                | 480.79                         | -221.83            | -98.93                              | -320.76                         |                                   |                               |

APPENDIX D

(cont.)

| Household number | Year | Name of the head of the household | Production team | Class status (1)           | Basic work points (2) | Total labor forces (3) | Male labor forces (4) | Female labor forces (5) | Total household population (6) | Age: 1 to 3 years old (7) | Age: 4 to 7 years old (8) | Age: 8 years old and above (9) | Work points of grain distribution (10) | Laboring work points (11) | Farmyard manure work points (12) | Total work points (13) | Work points of compulsory labor (14) | Work points of help cultivation (15) | Work points of private plots labor (16) | Total deducted work points (17) | Acutal workdays of participation in distribution (18) | Workpoints for rations distribution (19) | Rations per workpoint (20) | Total rations received form distribution (21) | Workdays of participation in distribu-tion (22) | Grains per workpoint (23) | Total grains distributed by work-points (24) | Grains subsidy (25) | Total Grains received from distribution (26) | Distributed grains per person (27) | Distributed grains per adult (28) | Grains received from privated plots (29) | Workdays of participation in distribution (30) | Value per workpoint (31) | Total value of workpoints (32) | Money used for investment (33) | Sum of income (34) | Money distributed in this year (34) | Deposit/ debt of this year (35) | Deposit/ debt over the years (36) | Accumulated deposit/debt (37) |
|------------------|------|-----------------------------------|-----------------|----------------------------|-----------------------|------------------------|-----------------------|-------------------------|--------------------------------|---------------------------|---------------------------|--------------------------------|----------------------------------------|---------------------------|----------------------------------|------------------------|--------------------------------------|--------------------------------------|-----------------------------------------|---------------------------------|-------------------------------------------------------|------------------------------------------|----------------------------|-----------------------------------------------|-------------------------------------------------|---------------------------|----------------------------------------------|---------------------|----------------------------------------------|------------------------------------|-----------------------------------|------------------------------------------|------------------------------------------------|--------------------------|--------------------------------|--------------------------------|--------------------|-------------------------------------|---------------------------------|-----------------------------------|-------------------------------|
| 197              | 1977 | Liu Peizhu                        | 2               | middle-class peasant       | 14                    | 2                      | 1                     | 1                       | 5                              |                           |                           |                                | 42                                     |                           |                                  | 303                    | 42                                   |                                      |                                         | 35                              |                                                       | 42                                       | 35.4                       | 1452                                          | 268                                             | 0.80                      | 214                                          | 1666.4              | 333.28                                       |                                    | 228                               | 268                                      | 0.83                                           | 222.44                   |                                |                                | 453.82             | -231.38                             | 278.74                          | 47.36                             |                               |
| 198              | 1977 | Liu Peijie                        | 2               | middle-class peasant       | 16                    | 3                      | 1                     | 2                       | 6                              |                           |                           |                                | 58                                     |                           |                                  | 265                    | 58                                   |                                      |                                         | 40                              |                                                       | 58                                       | 35.4                       | 2053                                          | 225                                             | 0.80                      | 180                                          | 2233.2              | 372.2                                        |                                    | 342                               | 225                                      | 0.83                                           | 186.75                   | 20                             |                                | 417.80             | -211.05                             | -383.59                         | -594.64                           |                               |
| 199              | 1977 | Meng Guilan                       | 2               | poor peasant               | 8                     | 2                      | 0                     | 2                       | 5                              |                           |                           |                                | 50                                     |                           |                                  | 643                    | 50                                   |                                      |                                         | 20                              |                                                       | 50                                       | 35.4                       | 1770                                          | 623                                             | 0.80                      | 498                                          | 2268.4              | 453.68                                       |                                    | 285                               | 623                                      | 0.83                                           | 517.09                   |                                |                                | 486.83             | 30.26                               | 78.73                           | 108.99                            |                               |
| 200              | 1977 | Wang Lianxiang                    | 2               | poor peasant               | 2.5                   | 1                      | 0                     | 1                       | 1                              |                           |                           |                                | 10                                     |                           |                                  | 207                    | 10                                   |                                      |                                         | 6                               |                                                       | 10                                       | 35.4                       | 354                                           | 201                                             | 0.80                      | 161                                          | 514.8               | 514.8                                        |                                    | 114                               | 201                                      | 0.83                                           | 166.83                   |                                |                                | 133.60             | 33.23                               | 82.12                           | 115.35                            |                               |
| 201              | 1977 | Wang Ende                         | 2               | poor peasant               |                       | 0                      |                       |                         |                                |                           |                           |                                |                                        |                           |                                  |                        | 0                                    |                                      |                                         |                                 |                                                       | 0                                        | 35.4                       | 0                                             | 0                                               | 0.80                      | 0                                            |                     | #DIV/0!                                      |                                    | 0                                 | 0                                        | 0.83                                           | 0.00                     |                                |                                | 0.00               |                                     | 0.00                            | 0.00                              |                               |
| 202              | 1977 | Meng Mingqing                     | 2               | low-middle-class peasant   |                       | 0                      |                       |                         | 2                              |                           |                           |                                | 20                                     |                           |                                  | 112                    | 20                                   |                                      |                                         |                                 |                                                       | 20                                       | 35.4                       | 708                                           | 112                                             | 0.80                      | 90                                           | 797.6               | 398.8                                        |                                    | 114                               | 112                                      | 0.83                                           | 92.96                    |                                |                                | 244.60             | -151.64                             | 243.08                          | 91.44                             |                               |
| 203              | 1977 | Meng Tianseng                     | 2               | low-middle-class peasant   | 10                    | 1                      | 1                     | 0                       | 4                              |                           |                           |                                | 38                                     |                           |                                  | 240                    | 38                                   |                                      |                                         | 20                              |                                                       | 38                                       | 35.4                       | 1345                                          | 220                                             | 0.80                      | 176                                          | 1521.2              | 380.3                                        |                                    | 228                               | 220                                      | 0.83                                           | 182.60                   | 0.9                            |                                | 375.69             | -192.19                             | 122.01                          | -70.18                            |                               |
| 204              | 1977 | Wang Yueming                      | 2               | poor peasant               | 16.5                  | 3                      | 1                     | 2                       | 10                             |                           |                           |                                | 100                                    |                           |                                  | 1100                   | 100                                  |                                      |                                         | 41                              |                                                       | 100                                      | 35.4                       | 3540                                          | 1059                                            | 0.80                      | 847                                          | 4387.2              | 438.72                                       |                                    | 570                               | 1059                                     | 0.83                                           | 878.97                   |                                |                                | 795.91             | 83.06                               | -29.60                          | 53.46                             |                               |
| 205              | 1977 | Wang Heshun                       | 2               | poor peasant               |                       | 1                      | 0                     | 1                       | 4                              |                           |                           |                                | 40                                     |                           |                                  | 522                    | 40                                   |                                      |                                         |                                 |                                                       | 40                                       | 35.4                       | 1416                                          | 522                                             | 0.80                      | 418                                          | 1833.6              | 458.4                                        |                                    | 399                               | 522                                      | 0.83                                           | 433.26                   | 72.8                           |                                | 524.15             | -18.09                              | 13.16                           | -4.93                             |                               |
| 206              | 1977 | Wen Yingjie                       | 2               | upper-middle-class peasant | 10.5                  | 2                      | 1                     | 1                       | 3                              |                           |                           |                                | 30                                     |                           |                                  | 463                    | 30                                   |                                      |                                         | 26                              |                                                       | 30                                       | 35.4                       | 1062                                          | 437                                             | 0.80                      | 350                                          | 1411.6              | 470.5333333                                  |                                    | 171                               | 437                                      | 0.83                                           | 362.71                   |                                |                                | 467.64             | -104.93                             | 568.22                          | 463.29                            |                               |
| 207              | 1977 | Liu Peiqian                       | 2               | low-middle-class peasant   | 18                    | 3                      | 1                     | 2                       | 7                              |                           |                           |                                | 70                                     |                           |                                  | 1118                   | 70                                   |                                      |                                         | 45                              |                                                       | 70                                       | 35.4                       | 2478                                          | 1073                                            | 0.80                      | 858                                          | 3336.4              | 476.6285714                                  |                                    | 399                               | 1073                                     | 0.83                                           | 890.59                   |                                |                                | 817.17             | 73.42                               | 152.22                          | 225.64                            |                               |
| 208              | 1977 | Liu Zhaoji                        | 2               | low-middle-class peasant   | 14                    | 2                      | 1                     | 1                       | 7                              |                           |                           |                                | 62                                     |                           |                                  | 598                    | 62                                   |                                      |                                         | 35                              |                                                       | 62                                       | 35.4                       | 2195                                          | 563                                             | 0.80                      | 450                                          | 2645.2              | 377.8857143                                  |                                    | 342                               | 563                                      | 0.83                                           | 467.29                   |                                |                                | 611.97             | -144.68                             | 45.29                           | -99.39                            |                               |
| 209              | 1977 | Yu Shengliang                     | 2               | poor peasant               |                       | 0                      |                       |                         |                                |                           |                           |                                |                                        |                           |                                  |                        | 0                                    |                                      |                                         |                                 |                                                       | 0                                        | 35.4                       | 0                                             | 0                                               | 0.80                      | 0                                            |                     | #DIV/0!                                      |                                    | 0                                 | 0                                        | 0.83                                           | 0.00                     |                                |                                | 0.00               |                                     | 0.00                            | 0.00                              |                               |
| 210              | 1977 | Meng Tianyou                      | 1               | poor peasant               |                       | 0                      |                       |                         | 1                              |                           |                           |                                | 10                                     |                           |                                  | 121                    | 10                                   |                                      |                                         |                                 |                                                       | 10                                       | 35.4                       | 354                                           | 121                                             | 0.72                      | 87                                           | 441.12              | 441.12                                       |                                    | 57                                | 121                                      | 0.77                                           | 93.17                    |                                |                                | 112.03             | -18.86                              | 169.58                          | 150.72                            |                               |
| 211              | 1977 | Meng Tianfu                       | 2               | middle-class peasant       | 18.5                  | 4                      | 1                     | 3                       | 8                              |                           |                           |                                | 78                                     |                           |                                  | 770                    | 78                                   |                                      |                                         | 46                              |                                                       | 78                                       | 35.4                       | 2761                                          | 724                                             | 0.80                      | 579                                          | 3340.4              | 417.55                                       |                                    | 456                               | 724                                      | 0.83                                           | 600.92                   |                                |                                | 712.68             | -111.76                             | -219.13                         | -330.89                           |                               |
| 212              | 1977 | Meng Xisheng                      | 2               | middle-class peasant       | 14                    | 2                      | 1                     | 1                       | 6                              |                           |                           |                                | 56                                     |                           |                                  | 536                    | 56                                   |                                      |                                         | 35                              |                                                       | 56                                       | 35.4                       | 1982                                          | 501                                             | 0.80                      | 401                                          | 2383.2              | 397.2                                        |                                    | 342                               | 501                                      | 0.83                                           | 415.83                   |                                |                                | 584.72             | -168.89                             | -348.76                         | -517.65                           |                               |
| 213              | 1977 | Gui Tiankuan                      | 1               | poor peasant               | 6.5                   | 2                      | 0                     | 2                       | 5                              |                           |                           |                                | 50                                     |                           |                                  | 873                    | 50                                   |                                      |                                         | 16                              |                                                       | 50                                       | 35.4                       | 1770                                          | 857                                             | 0.72                      | 617                                          | 2387.04             | 477.408                                      |                                    | 285                               | 857                                      | 0.77                                           | 659.89                   |                                |                                | 598.03             | 61.86                               | 908.06                          | 969.92                            |                               |
| 214              | 1977 | Kang Huaizhi                      | 2               | poor peasant               |                       | 0                      |                       |                         |                                |                           |                           |                                |                                        |                           |                                  |                        | 0                                    |                                      |                                         |                                 |                                                       | 0                                        | 35.4                       | 0                                             | 0                                               | 0.80                      | 0                                            |                     | #DIV/0!                                      |                                    | 0                                 | 0                                        | 0.83                                           | 0.00                     |                                |                                | 0.00               |                                     | 0.00                            | 0.00                              |                               |
| 215              | 1977 | Liu Huaiqing                      | 2               | poor peasant               | 4                     | 1                      | 0                     | 1                       | 7                              |                           |                           |                                | 66                                     |                           |                                  | 200                    | 66                                   |                                      |                                         | 10                              |                                                       | 66                                       | 35.4                       | 2336                                          | 190                                             | 0.80                      | 152                                          | 2488.4              | 355.4857143                                  |                                    | 342                               | 190                                      | 0.83                                           | 157.70                   | 85                             |                                | 446.28             | -203.58                             | -107.97                         | -311.55                           |                               |
| 216              | 1977 | Meng Xiuying                      | 2               | poor peasant               | 6.5                   | 2                      | 0                     | 2                       | 6                              |                           |                           |                                | 50                                     |                           |                                  | 128                    | 50                                   |                                      |                                         | 16                              |                                                       | 50                                       | 35.4                       | 1752                                          | 112                                             | 0.80                      | 90                                           | 1841.6              | 306.9333333                                  |                                    | 285                               | 112                                      | 0.83                                           | 92.96                    | 150                            |                                | 344.94             | -101.98                             | 501.32                          | 399.34                            |                               |
| 217              | 1977 | Meng Peiliang                     | 2               | middle-class peasant       | 32                    | 4                      | 3                     | 1                       | 9                              |                           |                           |                                | 90                                     |                           |                                  | 1232                   | 90                                   |                                      |                                         | 100                             |                                                       | 90                                       | 35.4                       | 3186                                          | 1132                                            | 0.80                      | 906                                          | 4091.6              | 454.6222222                                  |                                    | 513                               | 1132                                     | 0.83                                           | 939.56                   |                                |                                | 999.94             | -60.38                              | 815.64                          | 755.26                            |                               |

(cont.)

| Household number | Year | Name of the head of the household | Production team | Class status (1)         | Basic work points (2) | Total labor forces (3) | Male labor forces (4) | Female labor forces (5) | Total household population (6) | Age: 1 to 3 years old (7) | Age: 4 to 7 years old (8) | Age: 8 years old and above (9) | Work points of grain distribution (10) | Laboring work points (11) | Farmyard manure work points (12) | Total work points (13) | Work points of compulsory labor (14) | Work points of help cultivation (15) | Work points of private plots labor (16) | Total deducted work points (17) | Actual workdays of participation in distribution (18) | Workpoints for rations distribution (19) | Rations per workpoint (20) | Total rations received from distribution (21) | Workdays of participation in distribution (22) | Grains per workpoint (23) | Total grains distributed by work-points (24) | Grains subsidy (25) | Total Grains received from distribution (26) | Distributed grains per person (27) | Distributed grains per adult (28) | Grains received from private plots (29) | Workdays of participation in distribution (30) | Value per workpoint (31) | Total value of workpoints (32) | Money used for investment (33) | Sum of income (34) | Money distributed in this year (34) | Deposit/ debt of this year (35) | Deposit/ debt over the years (36) | Accumulated deposit/debt (37) |
|------------------|------|-----------------------------------|-----------------|--------------------------|-----------------------|------------------------|-----------------------|-------------------------|--------------------------------|---------------------------|---------------------------|--------------------------------|----------------------------------------|---------------------------|----------------------------------|------------------------|--------------------------------------|--------------------------------------|-----------------------------------------|---------------------------------|-------------------------------------------------------|------------------------------------------|----------------------------|-----------------------------------------------|------------------------------------------------|---------------------------|----------------------------------------------|---------------------|----------------------------------------------|------------------------------------|-----------------------------------|-----------------------------------------|------------------------------------------------|--------------------------|--------------------------------|--------------------------------|--------------------|-------------------------------------|---------------------------------|-----------------------------------|-------------------------------|
| 218              | 1977 | Meng Mingcheng                    | 2               | middle-class peasant     |                       | 0                      |                       |                         |                                |                           |                           |                                |                                        |                           |                                  |                        | 0                                    |                                      |                                         |                                 | 0                                                     | 35.4                                     | 0                          | 0                                             | 0.80                                           | 0                         | 0                                            | #DIV/o!             |                                              | 0                                  | 0                                 | 0.83                                    | 0.00                                           |                          |                                |                                |                    | 0.00                                | 0.00                            |                                   |                               |
| 219              | 1977 | Wu Shi'en                         | 1               | poor peasant             | 26                    | 4                      | 2                     | 2                       | 6                              |                           |                           |                                | 58                                     |                           |                                  |                        | 851                                  | 58                                   |                                         | 65                              |                                                       | 58                                       | 35.4                       | 2053                                          | 786                                            | 0.72                      | 566                                          | 2619.12             | 436.52                                       |                                    | 342                               | 786                                     | 0.77                                           | 605.22                   |                                |                                | 592.98             | 12.24                               | 223.21                          | 235.45                            |                               |
| 220              | 1977 | Wang Qingwen                      | 1               | poor peasant             | 22                    | 3                      | 2                     | 1                       | 4                              |                           |                           |                                | 40                                     |                           |                                  |                        | 1163                                 | 40                                   |                                         | 55                              |                                                       | 40                                       | 35.4                       | 1416                                          | 1108                                           | 0.72                      | 798                                          | 2213.76             | 553.44                                       |                                    | 228                               | 1108                                    | 0.77                                           | 853.16                   |                                |                                | 770.86             | 82.30                               | 498.71                          | 581.01                            |                               |
| 221              | 1977 | Ji Chunmei                        | 1               | poor peasant             |                       | 0                      |                       |                         |                                |                           |                           |                                |                                        |                           |                                  |                        |                                      | 0                                    |                                         |                                 | 0                                                     | 35.4                                     | 0                          | 0                                             | 0.72                                           | 0                         | 0                                            | #DIV/o!             |                                              | 0                                  | 0                                 | 0.77                                    | 0.00                                           |                          |                                | 0.00                           | 0.00               |                                     |                                 |                                   |                               |
| 222              | 1977 | Li Yushu                          | 1               | poor peasant             | 8                     | 1                      | 1                     | 0                       | 3                              |                           |                           |                                | 30                                     |                           |                                  |                        | 500                                  | 30                                   |                                         | 20                              |                                                       | 30                                       | 35.4                       | 1062                                          | 480                                            | 0.72                      | 346                                          | 1407.6              | 469.2                                        |                                    | 171                               | 480                                     | 0.77                                           | 369.60                   |                                |                                | 436.76             | -67.16                              | 746.77                          | 679.61                            |                               |
| 223              | 1977 | Yu Zhenji                         | 2               | poor peasant             |                       | 0                      |                       |                         |                                |                           |                           |                                |                                        |                           |                                  |                        |                                      | 0                                    |                                         |                                 | 0                                                     | 35.4                                     | 0                          | 0                                             | 0.80                                           | 0                         | 0                                            | #DIV/o!             |                                              | 0                                  | 0                                 | 0.83                                    | 0.00                                           |                          |                                | 0.00                           | 0.00               |                                     |                                 |                                   |                               |
| 224              | 1977 | Meng Jinxi                        | 0               | poor peasant             |                       | 0                      |                       |                         |                                |                           |                           |                                |                                        |                           |                                  |                        |                                      | 0                                    |                                         |                                 | 0                                                     | 35.4                                     | 0                          | 0                                             | 0.72                                           | 0                         | 0                                            | #DIV/o!             |                                              | 0                                  | 0                                 | 0.77                                    | 0.00                                           |                          |                                | 0.00                           | 0.00               |                                     |                                 |                                   |                               |
| 225              | 1977 | Li Guangkai                       | 1               | poor peasant             |                       | 0                      |                       |                         |                                |                           |                           |                                |                                        |                           |                                  |                        |                                      | 0                                    |                                         |                                 | 0                                                     | 35.4                                     | 0                          | 0                                             | 0.72                                           | 0                         | 0                                            | #DIV/o!             |                                              | 0                                  | 0                                 | 0.77                                    | 0.00                                           |                          |                                | 0.00                           | 0.00               |                                     |                                 |                                   |                               |
| 226              | 1977 | Liu Jigeng                        | 2               | poor peasant             | 10                    | 1                      | 1                     | 0                       | 5                              |                           |                           |                                | 50                                     |                           |                                  |                        | 594                                  | 50                                   |                                         | 25                              |                                                       | 50                                       | 35.4                       | 1770                                          | 569                                            | 0.80                      | 455                                          | 2225.2              | 445.04                                       |                                    | 285                               | 569                                     | 0.83                                           | 472.27                   |                                |                                | 510.29             | -38.02                              | 149.67                          | 111.65                            |                               |
| 227              | 1977 | Fan Shuzhi                        | 1               | middle-class peasant     | 14                    | 2                      | 1                     | 1                       | 7                              |                           |                           |                                | 68                                     |                           |                                  |                        | 424                                  | 68                                   |                                         | 35                              |                                                       | 68                                       | 35.4                       | 2407                                          | 389                                            | 0.72                      | 280                                          | 2687.28             | 383.8971429                                  |                                    | 399                               | 389                                     | 0.77                                           | 299.53                   |                                |                                | 624.74             | -325.21                             | -476.42                         | -801.63                           |                               |
| 228              | 1977 | Ji Guanglian                      | 1               | low-middle-class peasant | 4                     | 1                      | 0                     | 1                       | 6                              |                           |                           |                                | 54                                     |                           |                                  |                        | 9                                    | 54                                   |                                         | 10                              |                                                       | 54                                       | 35.4                       | 1912                                          |                                                | 0.72                      | 0                                            | 1911.6              | 318.6                                        |                                    | 342                               | 0                                       | 0.77                                           | 0.00                     | 383.6                          |                                |                    | 356.31                              | 27.29                           | -49.84                            | -22.55                        |
| 229              | 1977 | Yang Xiaozhong                    | 1               | low-middle-class peasant | 14                    | 2                      | 1                     | 1                       | 5                              |                           |                           |                                | 44                                     |                           |                                  |                        | 535                                  | 44                                   |                                         | 35                              |                                                       | 44                                       | 35.4                       | 1558                                          | 500                                            | 0.72                      | 360                                          | 1917.6              | 383.52                                       |                                    | 285                               | 500                                     | 0.77                                           | 385.00                   |                                |                                | 465.47             | -80.47                              | 424.62                          | 344.15                            |                               |
| 230              | 1977 | Meng Minghong                     | 2               | middle-class peasant     | 14                    | 2                      | 1                     | 1                       | 5                              |                           |                           |                                | 46                                     |                           |                                  |                        | 485                                  | 46                                   |                                         | 35                              |                                                       | 46                                       | 35.4                       | 1628                                          | 450                                            | 0.80                      | 360                                          | 1988.4              | 397.68                                       |                                    | 285                               | 450                                     | 0.83                                           | 373.50                   |                                |                                | 502.28             | -128.78                             | 110.85                          | -17.93                            |                               |
| 231              | 1977 | Zhang Xuewen                      | 0               | poor peasant             |                       | 0                      |                       |                         |                                |                           |                           |                                |                                        |                           |                                  |                        |                                      | 0                                    |                                         |                                 | 0                                                     | 35.4                                     | 0                          | 0                                             | 0.72                                           | 0                         | 0                                            | #DIV/o!             |                                              | 0                                  | 0                                 | 0.77                                    | 0.00                                           |                          |                                | 0.00                           | 0.00               |                                     |                                 |                                   |                               |
| 232              | 1977 | Wu Jingxiu                        | 0               | middle-class peasant     |                       | 0                      |                       |                         |                                |                           |                           |                                |                                        |                           |                                  |                        |                                      | 0                                    |                                         |                                 | 0                                                     | 35.4                                     | 0                          | 0                                             | 0.72                                           | 0                         | 0                                            | #DIV/o!             |                                              | 0                                  | 0                                 | 0.77                                    | 0.00                                           |                          |                                | 0.00                           | 0.00               |                                     |                                 |                                   |                               |
| 233              | 1977 | Fan Shugen                        | 2               | middle-class peasant     | 14                    | 2                      | 1                     | 1                       | 4                              |                           |                           |                                | 38                                     |                           |                                  |                        | 626                                  | 38                                   |                                         | 35                              |                                                       | 38                                       | 35.4                       | 1345                                          | 591                                            | 0.80                      | 473                                          | 1818                | 454.5                                        |                                    | 228                               | 591                                     | 0.83                                           | 490.53                   |                                |                                | 484.56             | 5.97                                | 508.93                          | 514.90                            |                               |
| 234              | 1977 | Yang Xiaoheng                     | 1               |                          |                       | 0                      |                       |                         |                                |                           |                           |                                |                                        |                           |                                  |                        |                                      | 0                                    |                                         |                                 | 0                                                     | 35.4                                     | 0                          | 0                                             | 0.72                                           | 0                         | 0                                            | #DIV/o!             |                                              | 0                                  | 0                                 | 0.77                                    | 0.00                                           |                          |                                | 0.00                           | 0.00               |                                     |                                 |                                   |                               |
| 235              | 1977 | Fan Xuewen                        | 1               |                          |                       | 0                      |                       |                         | 2                              |                           |                           |                                | 20                                     |                           |                                  |                        |                                      | 20                                   |                                         |                                 | 20                                                    | 35.4                                     | 708                        | 0                                             | 0.72                                           | 0                         | 708                                          | 354                 |                                              | 114                                | 0                                 | 0.77                                    | 0.00                                           | 40                       |                                | 103.21                         | -63.21             | -47.72                              | -110.93                         |                                   |                               |
| 236              | 1977 | Liu Yuzhen                        | 1               |                          |                       | 0                      |                       |                         |                                |                           |                           |                                |                                        |                           |                                  |                        |                                      | 0                                    |                                         |                                 | 0                                                     | 35.4                                     | 0                          | 0                                             | 0.72                                           | 0                         | 0                                            | #DIV/o!             |                                              | 0                                  | 0                                 | 0.77                                    | 0.00                                           |                          |                                | 0.00                           | 0.00               |                                     |                                 |                                   |                               |
| 237              | 1977 | Mu Chuncui                        | 1               | poor peasant             |                       | 0                      |                       |                         | 1                              |                           |                           |                                | 10                                     |                           |                                  |                        |                                      | 10                                   |                                         |                                 | 10                                                    | 35.4                                     | 354                        | 0                                             | 0.72                                           | 0                         | 354                                          | 354                 |                                              | 57                                 | 0                                 | 0.77                                    | 0.00                                           | 38.95                    |                                |                                | 55.86              | -16.91                              | -38.95                          | -55.86                            |                               |
| 238              | 1977 | Meng Mingliang                    | 2               | poor peasant             |                       | 0                      |                       |                         |                                |                           |                           |                                |                                        |                           |                                  |                        |                                      | 0                                    |                                         |                                 | 0                                                     | 35.4                                     | 0                          | 0                                             | 0.80                                           | 0                         | 0                                            | #DIV/o!             |                                              | 0                                  | 0                                 | 0.83                                    | 0.00                                           |                          |                                | 0.00                           | 0.00               |                                     |                                 |                                   |                               |
| 239              | 1977 | Wang Guilan                       | 1               | poor peasant             |                       | 0                      |                       |                         | 1                              |                           |                           |                                | 10                                     |                           |                                  |                        |                                      | 10                                   |                                         |                                 | 10                                                    | 35.4                                     | 354                        | 0                                             | 0.72                                           | 0                         | 354                                          | 354                 |                                              | 57                                 | 0                                 | 0.77                                    | 0.00                                           |                          |                                | 50.90                          | -50.90             | 180.17                              | 129.27                          |                                   |                               |
| 240              | 1977 | Wang Chuanxian                    | 1               | poor peasant             | 14                    | 2                      | 1                     | 1                       | 6                              |                           |                           |                                | 54                                     |                           |                                  |                        | 688                                  | 54                                   |                                         | 35                              |                                                       | 54                                       | 35.4                       | 1912                                          | 653                                            | 0.72                      | 470                                          | 2381.76             | 396.96                                       |                                    | 342                               | 653                                     | 0.77                                           | 502.81                   | 7.6                            |                                | 588.39             | -77.98                              | 46.59                           | -31.39                            |                               |
| 241              | 1977 | Wang Zhenquan                     | 1               | poor peasant             |                       | 0                      |                       |                         | 3                              |                           |                           |                                | 30                                     |                           |                                  |                        | 314                                  | 30                                   |                                         |                                 |                                                       | 30                                       | 35.4                       | 1062                                          | 314                                            | 0.72                      | 226                                          | 1288.08             | 429.36                                       |                                    | 171                               | 314                                     | 0.77                                           | 241.78                   |                                |                                | 245.12             | -3.34                               | 48.72                           | 45.38                             |                               |
| 243              | 1977 | Li Xiuying                        | 1               | poor peasant             |                       | 0                      |                       |                         |                                |                           |                           |                                |                                        |                           |                                  |                        |                                      | 0                                    |                                         |                                 | 0                                                     | 35.4                                     | 0                          | 0                                             | 0.72                                           | 0                         | 0                                            | #DIV/o!             |                                              | 0                                  | 0                                 | 0.77                                    | 0.00                                           |                          |                                | 0.00                           | 0.00               |                                     |                                 |                                   |                               |

(cont.)

| Household number | Year | Name of the head of the household | Production team | Class status (1)         | Basic work points (2) | Total labor forces (3) | Male labor forces (4) | Female labor forces (5) | Total household population (6) | Age: 1 to 3 years old (7) | Age: 4 to 7 years old (8) | Age: 8 years old and above (9) | Work points of grain distribution (10) | Laboring work points (11) | Farmyard manure work points (12) | Total work points (13) | Work points of compulsory labor (14) | Work points of help cultivation (15) | Work points of private plots labor (16) | Total deducted work points (17) | Actual workdays of participation in distribution (18) | Workpoints for rations distribution (19) | Rations per workpoint (20) | Total rations received from distribution (21) | Workdays of participation in distribution (22) | Grains per workpoint (23) | Total grains distributed by work-points (24) | Grains subsidy (25) | Total Grains received from distribution (26) | Distributed grains per person (27) | Distributed grains per adult (28) | Grains received from privated plots (29) | Workdays of participation in distribution (30) | Value per workpoint (31) | Total value of workpoints (32) | Money used for investment (33) | Sum of income (34) | Money distributed in this year (34) | Deposit/ debt of this year (35) | Deposit/ debt over the years (36) | Accumulated deposit/debt (37) |
|------------------|------|-----------------------------------|-----------------|--------------------------|-----------------------|------------------------|-----------------------|-------------------------|--------------------------------|---------------------------|---------------------------|--------------------------------|----------------------------------------|---------------------------|----------------------------------|------------------------|--------------------------------------|--------------------------------------|-----------------------------------------|---------------------------------|-------------------------------------------------------|------------------------------------------|----------------------------|-----------------------------------------------|------------------------------------------------|---------------------------|----------------------------------------------|---------------------|----------------------------------------------|------------------------------------|-----------------------------------|------------------------------------------|------------------------------------------------|--------------------------|--------------------------------|--------------------------------|--------------------|-------------------------------------|---------------------------------|-----------------------------------|-------------------------------|
| 244              | 1977 | Meng Jingxi                       | 1               | poor peasant             |                       | 0                      |                       |                         |                                |                           |                           |                                |                                        |                           |                                  |                        | 0                                    |                                      |                                         |                                 | 0                                                     | 35.4                                     | 0                          | 0                                             | 0.72                                           | 0                         | 0                                            | #DIV/o!             |                                              | 0                                  | 0                                 | 0.77                                     | 0.00                                           |                          |                                |                                |                    | 0.00                                |                                 | 0.00                              |                               |
| 245              | 1977 | Cao Jinren                        | 1               | poor peasant             |                       | 0                      |                       |                         |                                |                           |                           |                                |                                        |                           |                                  |                        | 0                                    |                                      |                                         |                                 | 0                                                     | 35.4                                     | 0                          | 0                                             | 0.72                                           | 0                         | 0                                            | #DIV/o!             |                                              | 0                                  | 0                                 | 0.77                                     | 0.00                                           |                          |                                |                                |                    | 0.00                                |                                 | 0.00                              |                               |
| 247              | 1977 | Wu Jinggui                        | 1               | poor peasant             |                       | 0                      |                       |                         |                                |                           |                           |                                |                                        |                           |                                  |                        | 0                                    |                                      |                                         |                                 | 0                                                     | 35.4                                     | 0                          | 0                                             | 0.72                                           | 0                         | 0                                            | #DIV/o!             |                                              | 0                                  | 0                                 | 0.77                                     | 0.00                                           |                          |                                |                                |                    | 0.00                                |                                 | 0.00                              |                               |
| 248              | 1977 | Zhang Yucang                      | 1               |                          |                       | 0                      |                       |                         |                                |                           |                           |                                |                                        |                           |                                  |                        | 0                                    |                                      |                                         |                                 | 0                                                     | 35.4                                     | 0                          | 0                                             | 0.72                                           | 0                         | 0                                            | #DIV/o!             |                                              | 0                                  | 0                                 | 0.77                                     | 0.00                                           |                          |                                |                                |                    | 0.00                                |                                 | 0.00                              |                               |
| 249              | 1977 | Zhang Lirong                      | 2               | poor peasant             |                       | 0                      |                       |                         |                                |                           |                           |                                |                                        |                           |                                  |                        | 0                                    |                                      |                                         |                                 | 0                                                     | 35.4                                     | 0                          | 0                                             | 0.80                                           | 0                         | 0                                            | #DIV/o!             |                                              | 0                                  | 0                                 | 0.83                                     | 0.00                                           |                          |                                |                                |                    | 0.00                                |                                 | 0.00                              |                               |
| 250              | 1977 | Zhang Liwen                       | 2               | poor peasant             | 14                    | 2                      | 1                     | 1                       | 6                              |                           |                           |                                | 50                                     |                           |                                  |                        | 675                                  | 50                                   |                                         | 35                              |                                                       | 50                                       | 35.4                       | 1770                                          | 640                                            | 0.80                      | 512                                          | 2282                | 380.3333333                                  |                                    | 285                               | 640                                      | 0.83                                           | 531.20                   |                                |                                | 552.78             | -21.58                              | 218.38                          | 196.80                            |                               |
| 251              | 1977 | Liu Ning                          | 2               |                          | 14                    | 2                      | 1                     | 1                       | 5                              |                           |                           |                                | 42                                     |                           |                                  |                        | 689                                  | 42                                   |                                         | 35                              |                                                       | 42                                       | 35.4                       | 1403                                          | 654                                            | 0.80                      | 523                                          | 1926.2              | 385.24                                       |                                    | 228                               | 654                                      | 0.83                                           | 542.82                   |                                |                                | 556.16             | -13.34                              | 328.51                          | 315.17                            |                               |
| 252              | 1977 | Niu Lanmei                        | 2               | poor peasant             | 4                     | 1                      | 0                     | 1                       | 3                              |                           |                           |                                | 28                                     |                           |                                  |                        | 89                                   | 28                                   |                                         | 10                              |                                                       | 28                                       | 35.4                       | 991                                           | 79                                             | 0.80                      | 63                                           | 1054.4              | 351.4666667                                  |                                    | 171                               | 79                                       | 0.83                                           | 65.57                    | 175                            |                                | 185.03             | 55.54                               | -262.27                         | -206.73                           |                               |
| 253              | 1977 | Meng Minglu                       | 2               | low-middle-class peasant | 30.5                  | 4                      | 3                     | 1                       | 5                              |                           |                           |                                | 50                                     |                           |                                  |                        | 1139                                 | 50                                   |                                         | 76                              |                                                       | 50                                       | 35.4                       | 1770                                          | 1063                                           | 0.80                      | 850                                          | 2620.4              | 524.08                                       |                                    | 285                               | 1063                                     | 0.83                                           | 882.29                   |                                |                                | 909.06             | -26.77                              | 1392.12                         | 1365.35                           |                               |
| 256              | 1977 | Cui Yongfu                        | 2               | poor peasant             |                       | 0                      |                       |                         |                                |                           |                           |                                |                                        |                           |                                  |                        |                                      |                                      |                                         |                                 | 0                                                     | 35.4                                     | 0                          | 0                                             | 0.80                                           | 0                         | 0                                            | #DIV/o!             |                                              | 0                                  | 0                                 | 0.83                                     | 0.00                                           |                          |                                |                                |                    | 0.00                                |                                 | 0.00                              |                               |
| 257              | 1977 | An Guobao                         | 1               | teacher                  |                       | 0                      |                       |                         |                                |                           |                           |                                |                                        |                           |                                  |                        |                                      |                                      |                                         |                                 | 0                                                     | 35.4                                     | 0                          | 0                                             | 0.72                                           | 0                         | 0                                            | #DIV/o!             |                                              | 0                                  | 0                                 | 0.77                                     | 0.00                                           |                          |                                |                                |                    | 0.00                                |                                 | 0.00                              |                               |
| 258              | 1977 | Liang Guangsheng                  |                 | teacher                  |                       | 0                      |                       |                         |                                |                           |                           |                                |                                        |                           |                                  |                        |                                      |                                      |                                         |                                 | 0                                                     | 35.4                                     | 0                          | 0                                             | 0.72                                           | 0                         | 0                                            | #DIV/o!             |                                              | 0                                  | 0                                 | 0.77                                     | 0.00                                           |                          |                                |                                |                    | 0.00                                |                                 | 0.00                              |                               |
| 259              | 1977 | Liu Jinlian                       |                 | teacher                  |                       | 0                      |                       |                         |                                |                           |                           |                                |                                        |                           |                                  |                        |                                      |                                      |                                         |                                 | 0                                                     | 35.4                                     | 0                          | 0                                             | 0.72                                           | 0                         | 0                                            | #DIV/o!             |                                              | 0                                  | 0                                 | 0.77                                     | 0.00                                           |                          |                                |                                |                    | 0.00                                |                                 | 0.00                              |                               |
| 260              | 1977 | Liu Xuexu                         |                 | cadre                    |                       | 0                      |                       |                         |                                |                           |                           |                                |                                        |                           |                                  |                        |                                      |                                      |                                         |                                 | 0                                                     | 35.4                                     | 0                          | 0                                             | 0.72                                           | 0                         | 0                                            | #DIV/o!             |                                              | 0                                  | 0                                 | 0.77                                     | 0.00                                           |                          |                                |                                |                    | 0.00                                |                                 | 0.00                              |                               |
| 261              | 1977 | Huang Qingxiang                   |                 | teacher                  |                       | 0                      |                       |                         |                                |                           |                           |                                |                                        |                           |                                  |                        |                                      |                                      |                                         |                                 | 0                                                     | 35.4                                     | 0                          | 0                                             | 0.72                                           | 0                         | 0                                            | #DIV/o!             |                                              | 0                                  | 0                                 | 0.77                                     | 0.00                                           |                          |                                |                                |                    | 0.00                                |                                 | 0.00                              |                               |
| 262              | 1977 | Han Junxiu                        |                 | cadre                    |                       | 0                      |                       |                         |                                |                           |                           |                                |                                        |                           |                                  |                        |                                      |                                      |                                         |                                 | 0                                                     | 35.4                                     | 0                          | 0                                             | 0.72                                           | 0                         | 0                                            | #DIV/o!             |                                              | 0                                  | 0                                 | 0.77                                     | 0.00                                           |                          |                                |                                |                    | 0.00                                |                                 | 0.00                              |                               |
| 263              | 1977 | Li Yonggong                       |                 | cadre                    |                       | 0                      |                       |                         |                                |                           |                           |                                |                                        |                           |                                  |                        |                                      |                                      |                                         |                                 | 0                                                     | 35.4                                     | 0                          | 0                                             | 0.72                                           | 0                         | 0                                            | #DIV/o!             |                                              | 0                                  | 0                                 | 0.77                                     | 0.00                                           |                          |                                |                                |                    | 0.00                                |                                 | 0.00                              |                               |
| 264              | 1977 | Ge Changliang                     |                 | teacher                  |                       | 0                      |                       |                         |                                |                           |                           |                                |                                        |                           |                                  |                        |                                      |                                      |                                         |                                 | 0                                                     | 35.4                                     | 0                          | 0                                             | 0.72                                           | 0                         | 0                                            | #DIV/o!             |                                              | 0                                  | 0                                 | 0.77                                     | 0.00                                           |                          |                                |                                |                    | 0.00                                |                                 | 0.00                              |                               |
| 265              | 1977 | Liu Baochang                      | 1               | poor peasant             | 14                    | 2                      | 1                     | 1                       | 4                              |                           |                           |                                | 32                                     |                           |                                  |                        | 347                                  | 32                                   |                                         | 35                              |                                                       | 32                                       | 35.4                       | 1133                                          | 312                                            | 0.72                      | 225                                          | 1357.44             | 339.36                                       |                                    | 228                               | 312                                      | 0.77                                           | 240.24                   |                                |                                | 340.67             | -100.43                             | 265.8                           | 165.37                            |                               |
| 266              | 1977 | Wang Wenkui                       | 1               | cadre                    | 14                    | 2                      | 1                     | 1                       | 3                              |                           |                           |                                | 26                                     |                           |                                  |                        | 458                                  | 26                                   |                                         | 35                              |                                                       | 26                                       | 35.4                       | 848                                           | 423                                            | 0.72                      | 305                                          | 1152.56             | 384.1866667                                  |                                    | 114                               | 423                                      | 0.77                                           | 325.71                   |                                |                                | 321.63             | 4.08                                | 246.94                          | 251.02                            |                               |
| 267              | 1977 | Zhao Pingfen                      | 1               | poor peasant             | 14                    | 2                      | 1                     | 1                       | 6                              |                           |                           |                                | 44                                     |                           |                                  |                        | 494                                  | 44                                   |                                         | 35                              |                                                       | 44                                       | 35.4                       | 1558                                          | 459                                            | 0.72                      | 330                                          | 1888.08             | 314.68                                       |                                    | 228                               | 459                                      | 0.77                                           | 353.43                   |                                |                                | 471.5              | -118.07                             | 294.34                          | 176.27                            |                               |
| 268              | 1977 | Gao Peiseng                       | 1               | poor peasant             | 14                    | 2                      | 1                     | 1                       | 4                              |                           |                           |                                | 32                                     |                           |                                  |                        | 554                                  | 32                                   |                                         | 35                              |                                                       | 32                                       | 35.4                       | 1133                                          | 519                                            | 0.72                      | 374                                          | 1506.48             | 376.62                                       |                                    | 171                               | 519                                      | 0.77                                           | 399.63                   |                                |                                | 370.77             | 28.86                               | 282.73                          | 311.59                            |                               |
| 269              | 1977 | Gao Peilin                        | 1               | poor peasant             | 14                    | 2                      | 1                     | 1                       | 4                              |                           |                           |                                | 34                                     |                           |                                  |                        | 830                                  | 34                                   |                                         | 35                              |                                                       | 34                                       | 35.4                       | 1204                                          | 795                                            | 0.72                      | 572                                          | 1776                | 444                                          |                                    | 228                               | 795                                      | 0.77                                           | 612.15                   |                                |                                | 464.33             | 147.82                              | 211.52                          | 359.34                            |                               |
| 270              | 1977 | Meng Fangli                       | 1               | middle-class peasant     | 4                     | 1                      | 0                     | 1                       | 5                              |                           |                           |                                | 44                                     |                           |                                  |                        | 270                                  | 44                                   |                                         | 10                              |                                                       | 44                                       | 35.4                       | 1558                                          | 260                                            | 0.72                      | 187                                          | 1744.8              | 348.96                                       |                                    | 285                               | 260                                      | 0.77                                           | 200.20                   | 97                             |                                | 321.58             | -24.38                              | -26.72                          | -51.10                            |                               |
| 271              | 1977 | Lan Weiyong                       | 1               | poor peasant             |                       | 0                      |                       |                         |                                |                           |                           |                                |                                        |                           |                                  |                        |                                      |                                      |                                         |                                 | 0                                                     | 35.4                                     | 0                          | 0                                             | 0.72                                           | 0                         | 0                                            | #DIV/o!             |                                              | 0                                  | 0                                 | 0.77                                     | 0.00                                           |                          |                                |                                |                    | 0.00                                |                                 | 0.00                              |                               |
| 272              | 1977 | Meng Tianyu                       | 1               | poor peasant             | 14                    | 2                      | 1                     | 1                       | 4                              |                           |                           |                                | 36                                     |                           |                                  |                        | 579                                  | 36                                   |                                         | 35                              |                                                       | 36                                       | 35.4                       | 1274                                          | 544                                            | 0.72                      | 392                                          | 1666.08             | 416.52                                       |                                    | 228                               | 544                                      | 0.77                                           | 418.88                   |                                |                                | 412.78             | 6.10                                | 202.68                          | 208.78                            |                               |
| 273              | 1977 | Wang Yongmei                      | 1               | teacher                  |                       | 0                      |                       |                         |                                |                           |                           |                                |                                        |                           |                                  |                        |                                      |                                      |                                         |                                 | 0                                                     | 35.4                                     | 0                          | 0                                             | 0.72                                           | 0                         | 0                                            | #DIV/o!             |                                              | 0                                  | 0                                 | 0.77                                     | 0.00                                           |                          |                                |                                |                    | 0.00                                |                                 | 0.00                              |                               |
| 274              | 1977 | Wang Chuanding                    | 2               | teacher                  |                       | 0                      |                       |                         |                                |                           |                           |                                |                                        |                           |                                  |                        |                                      |                                      |                                         |                                 | 0                                                     | 35.4                                     | 0                          | 0                                             | 0.80                                           | 0                         | 0                                            | #DIV/o!             |                                              | 0                                  | 0                                 | 0.83                                     | 0.00                                           |                          |                                |                                |                    | 0.00                                |                                 | 0.00                              |                               |
| 276              | 1977 | Cui Yili                          | 2               | poor peasant             | 14                    | 2                      | 1                     | 1                       | 3                              |                           |                           |                                | 26                                     |                           |                                  |                        | 471                                  | 26                                   |                                         | 35                              |                                                       | 26                                       | 35.4                       | 920                                           | 436                                            | 0.80                      | 349                                          | 1269.2              | 423.0666667                                  |                                    | 171                               | 436                                      | 0.83                                           | 361.88                   |                                |                                | 606.11             | -244.23                             | -17.4                           | -261.63                           |                               |
| 277              | 1977 | Liu Xiangting                     | 2               | poor peasant             | 4                     | 1                      | 0                     | 1                       | 4                              |                           |                           |                                | 34                                     |                           |                                  |                        | 237                                  | 34                                   |                                         | 10                              |                                                       | 34                                       | 35.4                       | 1204                                          | 227                                            | 0.80                      | 182                                          | 1385.2              | 346.3                                        |                                    | 228                               | 227                                      | 0.83                                           | 188.41                   |                                |                                | 257.32             | -68.91                              | 176.8                           | 107.89                            |                               |



DATASET DONGBEILI-SHANXI

(cont.)

| Household number | Year | Name of the head of the household | Production team | Class status (1)         | Basic work points (2) | Total labor forces (3) | Male labor forces (4) | Female labor forces (5) | Total household population (6) | Age: 1 to 3 years old (7) | Age: 4 to 7 years old (8) | Age: 8 years old and above (9) | Work points of grain distribution (10) | Laboring work points (11) | Farmyard manure work points (12) | Total work points (13) | Work points of compulsory labor (14) | Work points of help cultivation (15) | Work points of private plots labor (16) | Total deducted work points (17) | Actual workdays of participation in distribution (18) | Workpoints for rations distribution (19) | Rations per workpoint (20) | Total rations received from distribution (21) | Workdays of participation in distribution (22) | Grains per workpoint (23) | Total grains distributed by work-points (24) | Grains subsidy (25) | Total Grains received from distribution (26) | Distributed grains per person (27) | Distributed grains per adult (28) | Grains received from private plots (29) | Workdays of participation in distribution (30) | Value per workpoint (31) | Total value of workpoints (32) | Money used for investment (33) | Sum of income (34) | Money distributed in this year (34) | Deposit/ debt of this year (35) | Deposit/ debt over the years (36) | Accumulated deposit/debt (37) |
|------------------|------|-----------------------------------|-----------------|--------------------------|-----------------------|------------------------|-----------------------|-------------------------|--------------------------------|---------------------------|---------------------------|--------------------------------|----------------------------------------|---------------------------|----------------------------------|------------------------|--------------------------------------|--------------------------------------|-----------------------------------------|---------------------------------|-------------------------------------------------------|------------------------------------------|----------------------------|-----------------------------------------------|------------------------------------------------|---------------------------|----------------------------------------------|---------------------|----------------------------------------------|------------------------------------|-----------------------------------|-----------------------------------------|------------------------------------------------|--------------------------|--------------------------------|--------------------------------|--------------------|-------------------------------------|---------------------------------|-----------------------------------|-------------------------------|
| 278              | 1977 | Meng Hulin                        | 2               | poor peasant             | 14                    | 2                      | 1                     | 1                       | 3                              |                           |                           |                                | 26                                     |                           |                                  |                        | 336                                  | 26                                   |                                         |                                 | 35                                                    |                                          | 26                         | 35.4                                          | 920                                            | 301                       | 0.80                                         | 241                 | 1161.2                                       | 387.0666667                        | 171                               | 301                                     | 0.83                                           | 249.83                   |                                | 349.79                         | -99.96             | 159.24                              | 59.28                           |                                   |                               |
| 279              | 1977 | Gui Haigeng                       | 1               | poor peasant             | 4                     | 1                      | 0                     | 1                       | 3                              |                           |                           |                                | 26                                     |                           |                                  |                        | 201                                  | 26                                   |                                         | 10                              |                                                       | 26                                       | 35.4                       | 920                                           | 191                                            | 0.72                      | 138                                          | 1057.92             | 352.64                                       | 171                                | 191                               | 0.77                                    | 147.07                                         |                          | 207.26                         | -60.19                         | -31.19             | -91.38                              |                                 |                                   |                               |
| 280              | 1977 | Meng Tianfu                       | 2               | poor peasant             | 14.5                  | 2                      | 1                     | 1                       | 3                              |                           |                           |                                | 26                                     |                           |                                  |                        | 613                                  | 26                                   |                                         | 36                              |                                                       | 26                                       | 35.4                       | 920                                           | 577                                            | 0.80                      | 462                                          | 1382                | 460.6666667                                  | 171                                | 577                               | 0.83                                    | 478.91                                         |                          | 544.88                         | -65.97                         | 598.26             | 532.29                              |                                 |                                   |                               |
| 282              | 1977 | Liu Peiyi                         | 1               | poor peasant             |                       | 0                      |                       |                         |                                |                           |                           |                                |                                        |                           |                                  |                        |                                      | 0                                    |                                         |                                 | 0                                                     | 35.4                                     | 0                          | 0                                             | 0.72                                           | 0                         | 0                                            | #DIV/0!             | 0                                            | 0                                  | 0.77                              | 0.00                                    |                                                |                          | 0.00                           |                                | 0.00               |                                     |                                 |                                   |                               |
| 283              | 1977 | Wang Jie                          | 1               | poor peasant             |                       | 0                      |                       |                         |                                |                           |                           |                                |                                        |                           |                                  |                        |                                      | 0                                    |                                         |                                 | 0                                                     | 35.4                                     | 0                          | 0                                             | 0.72                                           | 0                         | 0                                            | #DIV/0!             | 0                                            | 0                                  | 0.77                              | 0.00                                    |                                                |                          | 0.00                           |                                | 0.00               |                                     |                                 |                                   |                               |
| 284              | 1977 | Zhang Guangxue                    | 1               |                          |                       | 0                      |                       |                         |                                |                           |                           |                                |                                        |                           |                                  |                        |                                      | 0                                    |                                         |                                 | 0                                                     | 35.4                                     | 0                          | 0                                             | 0.72                                           | 0                         | 0                                            | #DIV/0!             | 0                                            | 0                                  | 0.77                              | 0.00                                    |                                                |                          | 0.00                           |                                | 0.00               |                                     |                                 |                                   |                               |
| 285              | 1977 | Wu Weiyi                          | 2               |                          | 14                    | 2                      | 1                     | 1                       | 4                              |                           |                           |                                | 32                                     |                           |                                  |                        | 319                                  | 32                                   |                                         | 35                              |                                                       | 32                                       | 35.4                       | 1133                                          | 284                                            | 0.80                      | 227                                          | 1360                | 340                                          | 171                                | 284                               | 0.83                                    | 235.72                                         |                          | 266                            | -30.28                         |                    | -30.28                              |                                 |                                   |                               |
| 286              | 1977 | Wang Shusheng                     | 2               | poor peasant             | 14                    | 2                      | 1                     | 1                       | 3                              |                           |                           |                                | 26                                     |                           |                                  |                        | 345                                  | 26                                   |                                         | 35                              |                                                       | 26                                       | 35.4                       | 920                                           | 310                                            | 0.80                      | 248                                          | 1168.4              | 389.4666667                                  | 171                                | 310                               | 0.83                                    | 257.30                                         |                          | 299.76                         | -42.46                         | -73.3              | -115.76                             |                                 |                                   |                               |
| 287              | 1977 | Niu Rusheng                       | 1               | educated youth           |                       | 0                      |                       |                         |                                |                           |                           |                                |                                        |                           |                                  |                        |                                      | 0                                    |                                         |                                 | 0                                                     | 35.4                                     | 0                          | 0                                             | 0.72                                           | 0                         | 0                                            | #DIV/0!             | 0                                            | 0                                  | 0.77                              | 0.00                                    |                                                |                          | 0.00                           |                                | 0.00               |                                     |                                 |                                   |                               |
| 288              | 1977 | Yan Lianglian                     |                 | educated youth           |                       | 0                      |                       |                         |                                |                           |                           |                                |                                        |                           |                                  |                        |                                      | 0                                    |                                         |                                 | 0                                                     | 35.4                                     | 0                          | 0                                             | 0.72                                           | 0                         | 0                                            | #DIV/0!             | 0                                            | 0                                  | 0.77                              | 0.00                                    |                                                |                          | 0.00                           |                                | 0.00               |                                     |                                 |                                   |                               |
| 289              | 1977 | Huang Hailian                     |                 | educated youth           |                       | 0                      |                       |                         |                                |                           |                           |                                |                                        |                           |                                  |                        |                                      | 0                                    |                                         |                                 | 0                                                     | 35.4                                     | 0                          | 0                                             | 0.72                                           | 0                         | 0                                            | #DIV/0!             | 0                                            | 0                                  | 0.77                              | 0.00                                    |                                                |                          | 0.00                           |                                | 0.00               |                                     |                                 |                                   |                               |
| 290              | 1977 | Zhou Xiuhua                       |                 | educated youth           |                       | 0                      |                       |                         |                                |                           |                           |                                |                                        |                           |                                  |                        |                                      | 0                                    |                                         |                                 | 0                                                     | 35.4                                     | 0                          | 0                                             | 0.72                                           | 0                         | 0                                            | #DIV/0!             | 0                                            | 0                                  | 0.77                              | 0.00                                    |                                                |                          | 0.00                           |                                | 0.00               |                                     |                                 |                                   |                               |
| 291              | 1977 | Lan Aiyiing                       | 2               | educated youth           |                       | 0                      |                       |                         |                                |                           |                           |                                |                                        |                           |                                  |                        |                                      | 0                                    |                                         |                                 | 0                                                     | 35.4                                     | 0                          | 0                                             | 0.80                                           | 0                         | 0                                            | #DIV/0!             | 0                                            | 0                                  | 0.83                              | 0.00                                    |                                                |                          | 0.00                           |                                | 0.00               |                                     |                                 |                                   |                               |
| 292              | 1977 | Meng Erlin                        | 2               |                          | 22.5                  | 3                      | 2                     | 1                       | 5                              |                           |                           |                                | 50                                     |                           |                                  |                        | 474                                  | 50                                   |                                         | 56                              |                                                       | 50                                       | 35.4                       | 1770                                          | 418                                            | 0.80                      | 334                                          | 2104.4              | 420.88                                       | 285                                | 418                               | 0.83                                    | 346.94                                         | 36                       | 621.04                         | -238.10                        | 296.85             | 58.75                               |                                 |                                   |                               |
| 293              | 1977 | Liu Jinting                       | 2               |                          |                       | 0                      |                       |                         |                                |                           |                           |                                |                                        |                           |                                  |                        |                                      | 0                                    |                                         |                                 | 0                                                     | 35.4                                     | 0                          | 0                                             | 0.80                                           | 0                         | 0                                            | #DIV/0!             | 0                                            | 0                                  | 0.83                              | 0.00                                    |                                                |                          | 0.00                           |                                | 0.00               |                                     |                                 |                                   |                               |
| 294              | 1977 | Meng Peilin5                      | 2               |                          | 24.5                  | 4                      | 2                     | 2                       | 4                              |                           |                           |                                | 40                                     |                           |                                  |                        | 1159                                 | 40                                   |                                         | 61                              |                                                       | 40                                       | 35.4                       | 1416                                          | 1098                                           | 0.80                      | 878                                          | 2294.4              | 573.6                                        | 228                                | 1098                              | 0.83                                    | 911.34                                         |                          | 791.94                         | 119.40                         | 1277.25            | 1396.65                             |                                 |                                   |                               |
| 296              | 1977 | Wang Jiantang                     | 2               |                          |                       | 0                      |                       |                         |                                |                           |                           |                                |                                        |                           |                                  |                        |                                      | 0                                    |                                         |                                 | 0                                                     | 35.4                                     | 0                          | 0                                             | 0.80                                           | 0                         | 0                                            | #DIV/0!             | 0                                            | 0                                  | 0.83                              | 0.00                                    |                                                |                          | 0.00                           |                                | 0.00               |                                     |                                 |                                   |                               |
| 297              | 1977 | Wu Jinxing                        | 2               |                          | 14                    | 2                      | 1                     | 1                       | 4                              |                           |                           |                                | 34                                     |                           |                                  |                        | 681                                  | 34                                   |                                         | 35                              |                                                       | 34                                       | 35.4                       | 1204                                          | 646                                            | 0.80                      | 517                                          | 1720.4              | 430.1                                        | 228                                | 646                               | 0.83                                    | 536.18                                         |                          | 565.62                         | -29.44                         | 148.63             | 119.19                              |                                 |                                   |                               |
| 298              | 1977 | Li Jiaji                          | 1               | poor peasant             | 14                    | 2                      | 1                     | 1                       | 3                              |                           |                           |                                | 26                                     |                           |                                  |                        | 489                                  | 26                                   |                                         | 35                              |                                                       | 26                                       | 35.4                       | 920                                           | 454                                            | 0.72                      | 327                                          | 1247.28             | 415.76                                       | 171                                | 454                               | 0.77                                    | 349.58                                         |                          | 432.27                         | -82.69                         | 62.15              | -20.54                              |                                 |                                   |                               |
| 299              | 1977 | Liu Wuyi                          | 1               | poor peasant             | 14                    | 2                      | 1                     | 1                       | 6                              |                           |                           |                                | 52                                     |                           |                                  |                        | 670                                  | 52                                   |                                         | 35                              |                                                       | 52                                       | 35.4                       | 1841                                          | 635                                            | 0.72                      | 457                                          | 2298                | 383                                          | 285                                | 635                               | 0.77                                    | 488.95                                         | 96                       | 655.89                         | -70.94                         | 80.55              | 9.61                                |                                 |                                   |                               |
| 300              | 1977 | Hou Donglai                       | 1               | poor peasant             |                       | 0                      |                       |                         |                                |                           |                           |                                |                                        |                           |                                  |                        |                                      | 0                                    |                                         |                                 | 0                                                     | 35.4                                     | 0                          | 0                                             | 0.72                                           | 0                         | 0                                            | #DIV/0!             | 0                                            | 0                                  | 0.77                              | 0.00                                    |                                                |                          | 0.00                           |                                | 0.00               |                                     |                                 |                                   |                               |
| 301              | 1977 | Liang Shuxiang                    | 1               | poor peasant             | 4                     | 1                      | 0                     | 1                       | 2                              |                           |                           |                                | 20                                     |                           |                                  |                        | 259                                  | 20                                   |                                         | 10                              |                                                       | 20                                       | 35.4                       | 708                                           | 249                                            | 0.72                      | 179                                          | 887.28              | 443.64                                       | 114                                | 249                               | 0.77                                    | 191.73                                         |                          | 186.78                         | 4.95                           | 229.48             | 234.43                              |                                 |                                   |                               |
| 302              | 1977 | Jia Hongyun                       | 1               | low-middle-class peasant |                       | 0                      |                       |                         | 1                              |                           |                           |                                | 10                                     |                           |                                  |                        |                                      | 10                                   |                                         |                                 | 10                                                    | 35.4                                     | 354                        |                                               | 0                                              | 0.72                      | 0                                            | 354                 | 354                                          | 354                                | 57                                | 0                                       | 0.77                                           | 0.00                     | 70                             | 66.5                           | 3.50               | -29.92                              | -26.42                          |                                   |                               |
| 303              | 1977 | Cui Yizhi                         | 1               | poor peasant             | 12.5                  | 2                      | 1                     | 1                       | 3                              |                           |                           |                                | 30                                     |                           |                                  |                        | 526                                  | 30                                   |                                         | 31                              |                                                       | 30                                       | 35.4                       | 1062                                          | 495                                            | 0.72                      | 356                                          | 1418.4              | 472.8                                        | 171                                | 495                               | 0.77                                    | 381.15                                         |                          | 414.32                         | -33.17                         | 80.44              | 47.27                               |                                 |                                   |                               |
| 304              | 1977 | Shen Shangeng                     | 1               | poor peasant             | 4                     | 1                      | 0                     | 1                       | 6                              |                           |                           |                                | 60                                     |                           |                                  |                        | 704                                  | 60                                   |                                         | 10                              |                                                       | 60                                       | 35.4                       | 2124                                          | 694                                            | 0.72                      | 500                                          | 2623.68             | 437.28                                       | 342                                | 694                               | 0.77                                    | 534.38                                         |                          | 481.48                         | 52.90                          | 92.15              | 145.05                              |                                 |                                   |                               |
| 305              | 1977 | Wu Jianyao                        | 1               | poor peasant             | 2                     | 2                      | 1                     | 1                       | 4                              |                           |                           |                                | 34                                     |                           |                                  |                        | 541                                  | 34                                   |                                         | 35                              |                                                       | 34                                       | 35.4                       | 1204                                          | 506                                            | 0.72                      | 364                                          | 1567.92             | 391.98                                       | 171                                | 506                               | 0.77                                    | 389.62                                         |                          | 468.69                         | -79.07                         | 110.85             | 31.78                               |                                 |                                   |                               |
| 306              | 1977 | Lan Weizhi                        | 1               | poor peasant             | 30.5                  | 5                      | 2                     | 3                       | 8                              |                           |                           |                                | 76                                     |                           |                                  |                        | 1399                                 | 76                                   |                                         | 76                              |                                                       | 76                                       | 35.4                       | 2690                                          | 1323                                           | 0.72                      | 953                                          | 3642.96             | 455.37                                       | 456                                | 1323                              | 0.77                                    | 1018.71                                        |                          | 815.79                         | 202.92                         | 542.42             | 745.34                              |                                 |                                   |                               |
| 307              | 1977 | Gui Baogeng                       | 1               | poor peasant             | 14                    | 2                      | 1                     | 1                       | 4                              |                           |                           |                                | 32                                     |                           |                                  |                        | 222                                  | 32                                   |                                         | 35                              |                                                       | 32                                       | 35.4                       | 1133                                          | 187                                            | 0.72                      | 135                                          | 1267.44             | 316.86                                       | 171                                | 187                               | 0.77                                    | 143.99                                         |                          | 256.91                         | -112.92                        | 5.92               | -107.00                             |                                 |                                   |                               |
| 308              | 1977 | Fan Shumao                        | 1               |                          | 14                    | 2                      | 1                     | 1                       | 3                              |                           |                           |                                | 28                                     |                           |                                  |                        | 698                                  | 28                                   |                                         | 35                              |                                                       | 28                                       | 35.4                       | 991                                           | 663                                            | 0.72                      | 477                                          | 1468.56             | 489.52                                       | 171                                | 663                               | 0.77                                    | 510.51                                         |                          | 358.29                         | 152.22                         | 126.76             | 278.98                              |                                 |                                   |                               |
| 309              | 1977 | Wang Bangseng                     | 2               |                          | 14                    | 2                      | 1                     | 1                       | 3                              |                           |                           |                                | 26                                     |                           |                                  |                        | 399                                  | 26                                   |                                         | 35                              |                                                       | 26                                       | 35.4                       | 920                                           | 364                                            | 0.80                      | 291                                          | 1211.6              | 403.8666667                                  | 171                                | 364                               | 0.83                                    | 302.12                                         |                          | 296.74                         | 5.38                           | 120.89             | 126.27                              |                                 |                                   |                               |
| 310              | 1977 | Lan Aize                          | 2               |                          |                       | 0                      |                       |                         | 1                              |                           |                           |                                | 10                                     |                           |                                  |                        |                                      | 10                                   |                                         |                                 | 10                                                    | 35.4                                     | 354                        |                                               | 0                                              | 0.80                      | 0                                            | 354                 | 354                                          | 354                                | 57                                | 0                                       | 0.83                                           | 0.00                     |                                | 97.7                           | -97.70             | -1233.74                            | -1331.44                        |                                   |                               |

(cont.)

| Household number | Year | Name of the head of the household | Production team | Class status (1)         | Basic work points (2) | Total labor forces (3) | Male labor forces (4) | Female labor forces (5) | Total household population (6) | Age: 1 to 3 years old (7) | Age: 4 to 7 years old (8) | Age: 8 years old and above (9) | Work points of grain distribution (10) | Laboring work points (11) | Farmyard manure work points (12) | Total work points (13) | Work points of compulsory labor (14) | Work points of help cultivation (15) | Work points of private plots labor (16) | Total deducted work points (17) | Actual workdays of participation in distribution (18) | Workpoints for rations distribution (19) | Rations per workpoint (20) | Total rations received from distribution (21) | Workdays of participation in distribution (22) | Grains per workpoint (23) | Total grains distributed by work-points (24) | Grains subsidy (25) | Total Grains received from distribution (26) | Distributed grains per person (27) | Distributed grains per adult (28) | Grains received from private plots (29) | Workdays of participation in distribution (30) | Value per workpoint (31) | Total value of workpoints (32) | Money used for investment (33) | Sum of income (34) | Money distributed in this year (34) | Deposit/debt of this year (35) | Deposit/debt over the years (36) | Accumulated deposit/debt (37) |
|------------------|------|-----------------------------------|-----------------|--------------------------|-----------------------|------------------------|-----------------------|-------------------------|--------------------------------|---------------------------|---------------------------|--------------------------------|----------------------------------------|---------------------------|----------------------------------|------------------------|--------------------------------------|--------------------------------------|-----------------------------------------|---------------------------------|-------------------------------------------------------|------------------------------------------|----------------------------|-----------------------------------------------|------------------------------------------------|---------------------------|----------------------------------------------|---------------------|----------------------------------------------|------------------------------------|-----------------------------------|-----------------------------------------|------------------------------------------------|--------------------------|--------------------------------|--------------------------------|--------------------|-------------------------------------|--------------------------------|----------------------------------|-------------------------------|
| 311              | 1977 | Wu Jingyi                         | 2               |                          | 24                    | 3                      | 2                     | 1                       | 6                              |                           |                           |                                | 56                                     |                           |                                  |                        | 728                                  | 56                                   |                                         | 60                              |                                                       | 56                                       | 35.4                       | 1982                                          | 668                                            | 0.80                      | 534                                          | 2516.8              | 419.4666667                                  | 342                                | 668                               | 0.83                                    | 554.44                                         |                          | 552.59                         | 1.85                           | -270.31            | -268.46                             |                                |                                  |                               |
| 312              | 1977 | An Xiangqin                       | 2               |                          | 0                     |                        |                       |                         |                                |                           |                           |                                |                                        |                           |                                  |                        |                                      |                                      | 0                                       |                                 | 0                                                     |                                          | 0                          | 35.4                                          | 0                                              | 0                         | 0.80                                         | 0                   | 0                                            | #DIV/o!                            | 0                                 | 0                                       | 0.83                                           | 0.00                     |                                | 0.00                           |                    | 0.00                                |                                |                                  |                               |
| 313              | 1977 | Meng Qingtang                     | 2               |                          | 0                     |                        |                       |                         |                                |                           |                           |                                |                                        |                           |                                  |                        |                                      |                                      | 0                                       |                                 | 0                                                     |                                          | 0                          | 35.4                                          | 0                                              | 0                         | 0.80                                         | 0                   | 0                                            | #DIV/o!                            | 0                                 | 0                                       | 0.83                                           | 0.00                     |                                | 0.00                           |                    | 0.00                                |                                |                                  |                               |
| 314              | 1977 | Zhang Liseng                      | 2               |                          | 14                    | 2                      | 1                     | 1                       |                                | 4                         |                           |                                |                                        | 36                        |                                  |                        |                                      | 318                                  | 36                                      |                                 | 35                                                    |                                          | 36                         | 35.4                                          | 1214                                           | 283                       | 0.80                                         | 226                 | 1440.4                                       | 360.1                              | 171                               | 283                                     | 0.83                                           | 234.89                   |                                | 312.94                         | -78.05             | 212.8                               | 134.75                         |                                  |                               |
| 315              | 1977 | Zhang Jiaqing                     | 2               |                          | 4                     | 1                      | 0                     | 1                       |                                | 2                         |                           |                                |                                        | 20                        |                                  |                        |                                      | 318                                  | 20                                      |                                 | 10                                                    |                                          | 20                         | 35.4                                          | 708                                            | 308                       | 0.80                                         | 246                 | 954.4                                        | 477.2                              | 171                               | 308                                     | 0.83                                           | 255.64                   |                                | 280.08                         | -24.44             | 48.82                               | 24.38                          |                                  |                               |
| 317              | 1977 | Meng Xianshan                     | 2               |                          | 0                     |                        |                       |                         |                                |                           |                           |                                |                                        |                           |                                  |                        |                                      | 0                                    |                                         |                                 |                                                       | 0                                        | 35.4                       | 0                                             | 0                                              | 0.80                      | 0                                            | 0                   | #DIV/o!                                      | 0                                  | 0                                 | 0.83                                    | 0.00                                           |                          | 0.00                           |                                | 0.00               |                                     | 0.00                           |                                  |                               |
| 318              | 1977 | Gao Yongcai                       | 2               | poor peasant             | 14                    | 2                      | 1                     | 1                       | 4                              |                           |                           |                                | 34                                     |                           |                                  |                        | 519                                  | 34                                   |                                         | 35                              |                                                       | 34                                       | 35.4                       | 1204                                          | 484                                            | 0.80                      | 387                                          | 1590.8              | 397.7                                        | 171                                | 484                               | 0.83                                    | 401.72                                         |                          | 428.9                          | -27.18                         | 146.66             | 119.48                              |                                |                                  |                               |
| 319              | 1977 | Meng Mingying                     | 2               | poor peasant             |                       | 0                      |                       |                         |                                |                           |                           |                                |                                        |                           |                                  |                        |                                      | 0                                    |                                         |                                 |                                                       | 0                                        | 35.4                       | 0                                             | 0                                              | 0.80                      | 0                                            | 0                   | #DIV/o!                                      | 0                                  | 0                                 | 0.83                                    | 0.00                                           |                          | 0.00                           |                                | 0.00               |                                     | 0.00                           |                                  |                               |
| 320              | 1977 | Liu Ping                          | 2               | low-middle-class peasant | 14                    | 2                      | 1                     | 1                       | 4                              |                           |                           |                                | 32                                     |                           |                                  |                        | 471                                  | 32                                   |                                         | 35                              |                                                       | 32                                       | 35.4                       | 1133                                          | 436                                            | 0.80                      | 349                                          | 1481.6              | 370.4                                        | 171                                | 436                               | 0.83                                    | 361.88                                         |                          | 418.4                          | -56.52                         | -14.36             | -70.88                              |                                |                                  |                               |
| 322              | 1977 | Zhao Dongming                     | 1               | poor peasant             | 14                    | 2                      | 1                     | 1                       | 4                              |                           |                           |                                | 34                                     |                           |                                  |                        | 573                                  | 34                                   |                                         | 35                              |                                                       | 34                                       | 35.4                       | 1204                                          | 538                                            | 0.72                      | 387                                          | 1590.96             | 397.74                                       | 228                                | 538                               | 0.77                                    | 414.26                                         |                          | 380.55                         | 33.71                          | 99                 | 132.71                              |                                |                                  |                               |
| 323              | 1977 | Kong Fangfu                       | 1               | poor peasant             | 14                    | 2                      | 1                     | 1                       | 3                              |                           |                           |                                | 30                                     |                           |                                  |                        | 653                                  | 30                                   |                                         | 35                              |                                                       | 30                                       | 35.4                       | 1062                                          | 618                                            | 0.72                      | 445                                          | 1506.96             | 502.32                                       | 171                                | 618                               | 0.77                                    | 475.86                                         |                          | 406.45                         | 69.41                          | 172.46             | 241.87                              |                                |                                  |                               |
| 324              | 1977 | Li Yaoxing                        | 1               | poor peasant             | 14                    | 2                      | 1                     | 1                       | 6                              |                           |                           |                                | 58                                     |                           |                                  |                        | 507                                  | 58                                   |                                         | 35                              |                                                       | 58                                       | 35.4                       | 2053                                          | 472                                            | 0.72                      | 340                                          | 2393.04             | 398.84                                       | 342                                | 472                               | 0.77                                    | 363.44                                         |                          | 462.42                         | -98.98                         | 58.17              | -40.81                              |                                |                                  |                               |
| 325              | 1977 | Gao Peiyi                         | 1               | poor peasant             | 14                    | 2                      | 1                     | 1                       | 3                              |                           |                           |                                | 26                                     |                           |                                  |                        | 635                                  | 26                                   |                                         | 35                              |                                                       | 26                                       | 35.4                       | 920                                           | 600                                            | 0.72                      | 432                                          | 1352.4              | 450.8                                        | 171                                | 600                               | 0.77                                    | 462.00                                         |                          | 356.19                         | 105.81                         |                    | 105.81                              |                                |                                  |                               |
| 326              | 1977 | Meng Lanxiang                     | 1               | poor peasant             |                       | 0                      |                       |                         | 1                              |                           |                           |                                | 10                                     |                           |                                  |                        |                                      |                                      |                                         |                                 | 10                                                    | 35.4                                     | 354                        | 0                                             | 0.72                                           | 0                         | 354                                          | 354                 | 354                                          | 57                                 | 0                                 | 0.77                                    | 0.00                                           |                          | 70.8                           | -70.80                         | -423.6             | -494.40                             |                                |                                  |                               |
| 327              | 1977 | Li Baoyu                          | 1               | poor peasant             | 10                    | 1                      | 1                     | 0                       | 2                              |                           |                           |                                | 20                                     |                           |                                  |                        | 89                                   | 20                                   |                                         | 25                              |                                                       | 20                                       | 35.4                       | 708                                           | 64                                             | 0.72                      | 46                                           | 754.08              | 377.04                                       | 114                                | 64                                | 0.77                                    | 49.28                                          |                          | 541.47                         | -492.19                        | 235.65             | -256.54                             |                                |                                  |                               |
| 328              | 1977 | Dou Guobao                        | 1               | poor peasant             | 16.5                  | 3                      | 1                     | 2                       | 6                              |                           |                           |                                | 50                                     |                           |                                  |                        | 594                                  | 50                                   |                                         | 41                              |                                                       | 50                                       | 35.4                       | 1698                                          | 553                                            | 0.72                      | 398                                          | 2096.16             | 349.36                                       | 285                                | 553                               | 0.77                                    | 425.81                                         |                          | 514.1                          | -88.29                         | 437.05             | 348.76                              |                                |                                  |                               |
| 329              | 1977 | Lan Weiming                       | 1               | poor peasant             | 12.5                  | 2                      | 1                     | 1                       | 2                              |                           |                           |                                | 20                                     |                           |                                  |                        | 489                                  | 20                                   |                                         | 31                              |                                                       | 20                                       | 35.4                       | 708                                           | 458                                            | 0.72                      | 330                                          | 1037.76             | 518.88                                       | 114                                | 458                               | 0.77                                    | 352.66                                         |                          | 342.55                         | 10.11                          | 250.13             | 260.24                              |                                |                                  |                               |
| 330              | 1977 | Lan Weiyong                       | 1               | poor peasant             | 4                     | 1                      | 0                     | 1                       | 5                              |                           |                           |                                | 32                                     |                           |                                  |                        | 213                                  | 32                                   |                                         | 10                              |                                                       | 32                                       | 35.4                       | 1061                                          | 203                                            | 0.72                      | 146                                          | 1207.16             | 241.432                                      | 171                                | 203                               | 0.77                                    | 156.31                                         | 20                       | 226.68                         | -50.37                         | 8.59               | -41.78                              |                                |                                  |                               |
| 331              | 1977 | Hao Ailian                        | 1               | poor peasant             | 4                     | 1                      | 0                     | 1                       | 1                              |                           |                           |                                | 10                                     |                           |                                  |                        |                                      |                                      |                                         |                                 | 10                                                    | 35.4                                     | 354                        | 0                                             | 0.72                                           | 0                         | 354                                          | 354                 | 354                                          | 57                                 | 0                                 | 0.77                                    | 0.00                                           | 81.54                    | 59.98                          | 21.56                          | -51.54             | -29.98                              |                                |                                  |                               |
| 332              | 1977 | Li Shixian                        | 1               | poor peasant             | 14                    | 2                      | 1                     | 1                       | 3                              |                           |                           |                                | 26                                     |                           |                                  |                        | 438                                  | 26                                   |                                         | 35                              |                                                       | 26                                       | 35.4                       | 920                                           | 403                                            | 0.72                      | 290                                          | 1210.56             | 403.52                                       | 114                                | 403                               | 0.77                                    | 310.31                                         |                          | 260.27                         | 50.04                          |                    | 50.04                               |                                |                                  |                               |
| 333              | 1977 | Mu Zhaoyi                         | 1               | poor peasant             | 14                    | 2                      | 1                     | 1                       | 7                              |                           |                           |                                | 68                                     |                           |                                  |                        | 718                                  | 68                                   |                                         | 35                              |                                                       | 68                                       | 35.4                       | 2407                                          | 683                                            | 0.72                      | 492                                          | 2898.96             | 414.1371429                                  | 399                                | 683                               | 0.77                                    | 525.91                                         |                          | 718.74                         | -192.83                        | 17.2               | -175.63                             |                                |                                  |                               |
| 334              | 1977 | Xing Shangwen                     | 1               | poor peasant             | 10                    | 1                      | 1                     | 0                       | 3                              |                           |                           |                                | 28                                     |                           |                                  |                        | 369                                  | 28                                   |                                         | 25                              |                                                       | 28                                       | 35.4                       | 991                                           | 344                                            | 0.72                      | 248                                          | 1238.88             | 412.96                                       | 171                                | 344                               | 0.77                                    | 264.88                                         |                          | 321.84                         | -56.96                         | 43.46              | -13.50                              |                                |                                  |                               |
| 335              | 1977 | Gui Baoying                       | 1               | poor peasant             | 4                     | 1                      | 0                     | 1                       | 3                              |                           |                           |                                | 22                                     |                           |                                  |                        | 52                                   | 22                                   |                                         | 10                              |                                                       | 22                                       | 35.4                       | 749                                           | 42                                             | 0.72                      | 30                                           | 779.24              | 259.7466667                                  | 114                                | 42                                | 0.77                                    | 32.34                                          | 80                       | 147.05                         | -34.71                         | -11.8              | -46.51                              |                                |                                  |                               |
| 336              | 1977 | Kong Fanggui                      | 1               | poor peasant             | 4                     | 1                      | 0                     | 1                       | 2                              |                           |                           |                                | 16                                     |                           |                                  |                        |                                      |                                      |                                         |                                 | 16                                                    | 35.4                                     | 566                        | 0                                             | 0.72                                           | 0                         | 566.4                                        | 283.2               | 114                                          | 0                                  | 0.77                              | 0.00                                    |                                                | 102.72                   | -102.72                        |                                | -102.72            |                                     |                                |                                  |                               |
| 337              | 1977 | Wang Fengcai                      | 1               | poor peasant             |                       | 0                      |                       |                         | 1                              |                           |                           |                                | 10                                     |                           |                                  |                        |                                      |                                      |                                         |                                 | 10                                                    | 35.4                                     | 354                        | 0                                             | 0.72                                           | 0                         | 354                                          | 354                 | 354                                          | 57                                 | 0                                 | 0.77                                    | 0.00                                           |                          | 0.00                           |                                | 0.00               |                                     | 0.00                           |                                  |                               |
| 338              | 1977 | Yu Qiaomei                        | 1               | poor peasant             | 4                     | 1                      | 0                     | 1                       | 1                              |                           |                           |                                | 10                                     |                           |                                  |                        | 26                                   | 10                                   |                                         | 10                              |                                                       | 10                                       | 35.4                       | 354                                           | 16                                             | 0.72                      | 12                                           | 365.52              | 365.52                                       | 57                                 | 16                                | 0.77                                    | 12.32                                          |                          | 59.96                          | -47.64                         |                    | -47.64                              |                                |                                  |                               |
| 339              | 1977 | Liu Peide                         | 1               | poor peasant             |                       | 0                      |                       |                         |                                |                           |                           |                                |                                        |                           |                                  |                        | 604                                  | 0                                    |                                         |                                 |                                                       | 0                                        | 35.4                       | 0                                             | 604                                            | 0.72                      | 435                                          | 434.88              | #DIV/o!                                      | 0                                  | 604                               | 0.77                                    | 465.08                                         |                          |                                | 465.08                         |                    | 465.08                              |                                |                                  |                               |
| 341              | 1977 | Wei Ruihong                       | 2               | poor peasant             | 14                    | 2                      | 1                     | 1                       | 5                              |                           |                           |                                | 42                                     |                           |                                  |                        | 618                                  | 42                                   |                                         | 35                              |                                                       | 42                                       | 35.4                       | 1487                                          | 583                                            | 0.80                      | 466                                          | 1953.2              | 390.64                                       | 228                                | 583                               | 0.83                                    | 483.89                                         |                          | 514.94                         | -31.05                         | 156.41             | 125.36                              |                                |                                  |                               |
| 342              | 1977 | Wang Youlan                       | 2               | middle-class peasant     | 4                     | 1                      | 0                     | 1                       | 6                              |                           |                           |                                | 58                                     |                           |                                  |                        | 163                                  | 58                                   |                                         | 10                              |                                                       | 58                                       | 35.4                       | 2053                                          | 153                                            | 0.80                      | 122                                          | 2175.6              | 362.6                                        | 399                                | 153                               | 0.83                                    | 126.99                                         |                          | 602                            | -475.01                        | -1883.24           | -2358.25                            |                                |                                  |                               |
| 343              | 1977 | Liu Baofu                         | 2               | poor peasant             | 14                    | 2                      | 1                     | 1                       | 4                              |                           |                           |                                | 32                                     |                           |                                  |                        | 208                                  | 32                                   |                                         | 35                              |                                                       | 32                                       | 35.4                       | 1097                                          | 173                                            | 0.80                      | 138                                          | 1235.4              | 308.85                                       | 171                                | 173                               | 0.83                                    | 143.59                                         |                          | 286.78                         | -143.19                        |                    | -143.19                             |                                |                                  |                               |

(cont.)

| Household number | Year | Name of the head of the household | Production team | Class status (1) | Basic work points (2) | Total labor forces (3) | Male labor forces (4) | Female labor forces (5) | Total household population (6) | Age: 1 to 3 years old (7) | Age: 4 to 7 years old (8) | Age: 8 years old and above (9) | Work points of grain distribution (10) | Laboring work points (11) | Farmyard manure work points (12) | Total work points (13) | Work points of compulsory labor (14) | Work points of help cultivation (15) | Work points of private plots labor (16) | Total deducted work points (17) | Acutal workdays of participation in distribution (18) | Workpoints for rations distribution (19) | Rations per workpoint (20) | Total rations received form distribution (21) | Workdays of participation in distribu-tion (22) | Grains per workpoint (23) | Total grains distributed by work-points (24) | Grains subsidy (25) | Total Grains received from distribution (26) | Distributed grains per person (27) | Distributed grains per adult (28) | Grains received from privated plots (29) | Workdays of participation in distribution (30) | Value per workpoint (31) | Total value of workpoints (32) | Money used for investment (33) | Sum of income (34) | Money distributed in this year (34) | Deposit/ debt of this year (35) | Deposit/ debt over the years (36) | Accumulated deposit/debt (37) |
|------------------|------|-----------------------------------|-----------------|------------------|-----------------------|------------------------|-----------------------|-------------------------|--------------------------------|---------------------------|---------------------------|--------------------------------|----------------------------------------|---------------------------|----------------------------------|------------------------|--------------------------------------|--------------------------------------|-----------------------------------------|---------------------------------|-------------------------------------------------------|------------------------------------------|----------------------------|-----------------------------------------------|-------------------------------------------------|---------------------------|----------------------------------------------|---------------------|----------------------------------------------|------------------------------------|-----------------------------------|------------------------------------------|------------------------------------------------|--------------------------|--------------------------------|--------------------------------|--------------------|-------------------------------------|---------------------------------|-----------------------------------|-------------------------------|
| 344              | 1977 | Liu Peidez                        | 2               | poor peasant     | 14                    | 2                      | 1                     | 1                       | 5                              |                           |                           |                                | 44                                     |                           |                                  | 169                    | 44                                   |                                      |                                         | 35                              |                                                       | 44                                       | 35.4                       | 1558                                          | 134                                             | 0.80                      | 107                                          |                     | 1664.8                                       | 332.96                             |                                   | 285                                      | 134                                            | 0.83                     | 111.22                         |                                |                    | 912.87                              | -801.65                         | 492.59                            | -309.06                       |
| 345              | 1977 | An Xiuqing                        | 2               | poor peasant     | 2.5                   | 1                      | 0                     | 1                       | 1                              |                           |                           |                                | 10                                     |                           |                                  | 9                      | 10                                   |                                      |                                         | 6                               |                                                       | 10                                       | 35.4                       | 354                                           | 3                                               | 0.80                      | 2                                            |                     | 356.4                                        | 356.4                              |                                   | 57                                       | 3                                              | 0.83                     | 2.49                           |                                |                    | 111.35                              | -108.86                         | 258.14                            | 149.28                        |
| 346              | 1977 | Jing Xiuying                      | 2               | poor peasant     | 22                    | 3                      | 2                     | 1                       | 5                              |                           |                           |                                | 50                                     |                           |                                  | 531                    | 50                                   |                                      |                                         | 55                              |                                                       | 50                                       | 35.4                       | 1770                                          | 476                                             | 0.80                      | 381                                          |                     | 2150.8                                       | 430.16                             |                                   | 285                                      | 476                                            | 0.83                     | 395.08                         | 30                             |                    | 390.52                              | 34.56                           | -90.68                            | -56.12                        |
| 347              | 1977 | Gao Yongbai                       | 2               | poor peasant     | 14                    | 2                      | 1                     | 1                       | 2                              |                           |                           |                                | 20                                     |                           |                                  | 474                    | 20                                   |                                      |                                         | 35                              |                                                       | 20                                       | 35.4                       | 708                                           | 439                                             | 0.80                      | 351                                          |                     | 1059.2                                       | 529.6                              |                                   | 114                                      | 439                                            | 0.83                     | 364.37                         |                                |                    | 257.11                              | 107.26                          |                                   | 107.26                        |
| 348              | 1977 | Hao Nianyun                       | 2               |                  |                       | 0                      |                       |                         | 1                              |                           |                           |                                | 10                                     |                           |                                  |                        | 10                                   |                                      |                                         |                                 |                                                       | 10                                       | 35.4                       | 354                                           | 0                                               | 0.80                      | 0                                            |                     | 354                                          | 354                                |                                   | 57                                       | 0                                              | 0.83                     | 0.00                           | 100                            |                    | 60.41                               | 39.59                           | 37.15                             | 76.74                         |
| 349              | 1977 | Hou Guiliang                      | 2               |                  |                       | 0                      |                       |                         | 2                              |                           |                           |                                | 20                                     |                           |                                  | 162                    | 20                                   |                                      |                                         |                                 |                                                       | 20                                       | 35.4                       | 708                                           | 162                                             | 0.80                      | 130                                          |                     | 837.6                                        | 418.8                              |                                   | 114                                      | 162                                            | 0.83                     | 134.46                         |                                |                    | 236.8                               | -102.34                         | 212.95                            | 110.61                        |
| 350              | 1977 | Lian Huaizhen                     | 2               | poor peasant     | 14                    | 2                      | 1                     | 1                       | 9                              |                           |                           |                                | 84                                     |                           |                                  | 502                    | 84                                   |                                      |                                         | 35                              |                                                       | 84                                       | 35.4                       | 2974                                          | 467                                             | 0.80                      | 374                                          |                     | 3347.2                                       | 371.91111111                       |                                   | 513                                      | 467                                            | 0.83                     | 387.61                         |                                |                    | 758.43                              | -370.82                         | -1577.12                          | -1947.94                      |
| 351              | 1977 | Hou Zhenqi                        | 2               | poor peasant     | 10                    | 1                      | 1                     | 0                       | 2                              |                           |                           |                                | 20                                     |                           |                                  | 419                    | 20                                   |                                      |                                         | 25                              |                                                       | 20                                       | 35.4                       | 708                                           | 394                                             | 0.80                      | 315                                          |                     | 1023.2                                       | 511.6                              |                                   | 114                                      | 394                                            | 0.83                     | 327.02                         |                                |                    | 328.45                              | -1.43                           | 323.29                            | 321.86                        |
| 352              | 1977 | Wang Yaotang                      | 2               | poor peasant     | 4                     | 1                      | 0                     | 1                       | 4                              |                           |                           |                                | 40                                     |                           |                                  | 396                    | 40                                   |                                      |                                         | 10                              |                                                       | 40                                       | 35.4                       | 1416                                          | 386                                             | 0.80                      | 309                                          |                     | 1724.8                                       | 431.2                              |                                   | 228                                      | 386                                            | 0.83                     | 320.38                         | 114.94                         |                    | 306.12                              | 129.20                          | -14.94                            | 114.26                        |
| 354              | 1977 | Meng Tainyi                       | 2               | poor peasant     | 14                    | 2                      | 1                     | 1                       | 3                              |                           |                           |                                | 26                                     |                           |                                  | 396                    | 26                                   |                                      |                                         | 35                              |                                                       | 26                                       | 35.4                       | 848                                           | 361                                             | 0.80                      | 289                                          |                     | 1136.8                                       | 378.93333333                       |                                   | 57                                       | 361                                            | 0.83                     | 299.63                         |                                |                    | 213.16                              | 86.47                           |                                   | 86.47                         |
| 355              | 1977 | Meng Xiaohong                     | 2               | poor peasant     |                       | 0                      |                       |                         | 1                              |                           |                           |                                | 10                                     |                           |                                  |                        | 10                                   |                                      |                                         |                                 |                                                       | 10                                       | 35.4                       | 354                                           | 0                                               | 0.80                      | 0                                            |                     | 354                                          | 354                                |                                   | 57                                       | 0                                              | 0.83                     | 0.00                           |                                |                    | 38.4                                | -38.40                          |                                   | -38.40                        |
| 356              | 1977 | Wang Hushan                       | 2               | poor peasant     | 14                    | 2                      | 1                     | 1                       | 2                              |                           |                           |                                | 20                                     |                           |                                  | 427                    | 20                                   |                                      |                                         | 35                              |                                                       | 20                                       | 35.4                       | 708                                           | 392                                             | 0.80                      | 314                                          |                     | 1021.6                                       | 510.8                              |                                   | 57                                       | 392                                            | 0.83                     | 325.36                         |                                |                    | 105.46                              | 219.90                          |                                   | 219.90                        |
| 357              | 1977 | Wang Niucheng                     | 2               | poor peasant     | 14                    | 2                      | 1                     | 1                       | 5                              |                           |                           |                                | 44                                     |                           |                                  | 168                    | 44                                   |                                      |                                         | 35                              |                                                       | 44                                       | 35.4                       | 1558                                          | 133                                             | 0.80                      | 106                                          |                     | 1664                                         | 332.8                              |                                   | 285                                      | 133                                            | 0.83                     | 110.39                         |                                |                    | 256.17                              | -145.78                         |                                   | -145.78                       |
| 358              | 1977 | Liu Peixin                        | 2               | poor peasant     | 14                    | 2                      | 1                     | 1                       | 4                              |                           |                           |                                | 32                                     |                           |                                  | 558                    | 32                                   |                                      |                                         | 35                              |                                                       | 32                                       | 35.4                       | 1049                                          | 521                                             | 0.80                      | 417                                          |                     | 1465.8                                       | 366.45                             |                                   | 171                                      | 521                                            | 0.83                     | 432.43                         |                                |                    | 282.64                              | 149.79                          |                                   | 149.79                        |
