# Supplementary material
Source: publisher figshare collection journal article supplement (https://brill.figshare.com/articles/dataset/_/19361666)
Supplement: Supplementary file 2 [file 1]

Dataset Hegou-Jiangsu

| Household number | Year | Name of the head of the household | Family class status  | Family members | Family characters                 | Labor | Number of standard population | Work points settlement |                             |                    |                             |                            | Grain distribution           |                             |                             |                                 |                                      | Firewood distribution   | Work points income (Yuan)      |                     |                         |                            | Deducted amount (Yuan) |                        |                           |                                       |                                    | Distribution results (Yuan) | Distribution results (Yuan)             |                                           |                           | Guanxi                                  |                      |                  |                |                |
|------------------|------|-----------------------------------|----------------------|----------------|-----------------------------------|-------|-------------------------------|------------------------|-----------------------------|--------------------|-----------------------------|----------------------------|------------------------------|-----------------------------|-----------------------------|---------------------------------|--------------------------------------|-------------------------|--------------------------------|---------------------|-------------------------|----------------------------|------------------------|------------------------|---------------------------|---------------------------------------|------------------------------------|-----------------------------|-----------------------------------------|-------------------------------------------|---------------------------|-----------------------------------------|----------------------|------------------|----------------|----------------|
|                  |      |                                   |                      |                |                                   |       |                               | Laboring work points   | Farmyard manure work points | Sum of work points | subsidy work points by cash | Sum of work points by cash | Subsidy work points by grain | Sum of work points by grain | Grain distribution: rations | Grain distribution: work points | Grain distribution: subsidized grain | Grain distribution: sum | Grain distribution: per capita | Income: work points | Income: welfare subsidy | Income: prepaied overdraft | Income: sum            | Deducted amount: grain | Deducted amount: firewood | Deducted amount: other things in kind | Deducted amount: withdraw advances | Deducted amount: sum        | Distribution results: personal solution | Distribution results: collective solution | Distribution results: sum | Interpersonal relationship with leaders | Family class status2 | Number of leader | Name of leader | Term of office |
| 1                | 1971 | Ma Zhenqi                         | middle-class peasant | 2              |                                   |       |                               | 701                    | 140                         | 841                |                             | 841                        |                              | 841                         | 106                         | 20                              |                                      | 126                     | 63.092                         | 40                  |                         |                            |                        |                        |                           |                                       |                                    |                             |                                         |                                           |                           | 3                                       | 2                    | 1                | Wang Dexiu     | 1              |
| 2                | 1971 | Wang Xinming                      | middle-class peasant | 8              |                                   |       |                               | 2276                   | 395                         | 2671               |                             | 2671                       |                              | 2671                        | 424                         | 64                              |                                      | 488                     | 61.013                         | 160                 |                         |                            |                        |                        |                           |                                       |                                    |                             |                                         |                                           |                           | 2                                       | 2                    | 1                | Wang Dexiu     | 1              |
| 3                | 1971 | Feng Kaiying                      | poor peasant         | 5              |                                   |       |                               | 1709                   | 247                         | 1956               |                             | 1956                       |                              | 1956                        | 265                         | 47                              |                                      | 312                     | 62.3888                        | 100                 |                         |                            |                        |                        |                           |                                       |                                    |                             |                                         |                                           |                           | 3                                       | 3                    | 1                | Wang Dexiu     | 1              |
| 4                | 1971 | Wang Tinglan                      | poor peasant         | 3              |                                   |       |                               | 2472                   | 293                         | 2765               |                             | 2765                       |                              | 2765                        | 159                         | 66                              |                                      | 225                     | 75.12                          | 60                  |                         |                            |                        |                        |                           |                                       |                                    |                             |                                         |                                           |                           | 1                                       | 3                    | 1                | Wang Dexiu     | 1              |
| 5                | 1971 | Wang Zuoliang                     | poor peasant         | 4              |                                   |       |                               | 1466                   | 249                         | 1715               |                             | 1715                       |                              | 1715                        | 212                         | 41                              |                                      | 253                     | 63.29                          | 80                  |                         |                            |                        |                        |                           |                                       |                                    |                             |                                         |                                           |                           | 2                                       | 3                    | 1                | Wang Dexiu     | 1              |
| 6                | 1971 | Wang Tingmei                      | poor peasant         | 6              |                                   |       |                               | 1707                   | 295                         | 2002               |                             | 2002                       |                              | 2002                        | 318                         | 48                              |                                      | 366                     | 61.008                         | 120                 |                         |                            |                        |                        |                           |                                       |                                    |                             |                                         |                                           |                           | 3                                       | 3                    | 1                | Wang Dexiu     | 1              |
| 7                | 1971 | Wang Tingxi                       | poor peasant         | 4              |                                   |       |                               | 1633                   | 187                         | 1820               |                             | 1820                       |                              | 1820                        | 212                         | 44                              |                                      | 256                     | 63.92                          | 80                  |                         |                            |                        |                        |                           |                                       |                                    |                             |                                         |                                           |                           | 3                                       | 3                    | 1                | Wang Dexiu     | 1              |
| 8                | 1971 | Tingxi's Mother                   | poor peasant         | 1              | families of revolutionary martyrs |       |                               | 0                      | 0                           | 0                  | 600                         | 600                        |                              | 600                         | 53                          | 14                              |                                      | 67                      | 67.4                           | 20                  |                         |                            |                        |                        |                           |                                       |                                    |                             |                                         |                                           |                           | 2                                       | 3                    | 1                | Wang Dexiu     | 1              |
| 9                | 1971 | Wang Tingzhi                      | poor peasant         | 4              |                                   |       |                               | 1989                   | 241                         | 2230               |                             | 2230                       |                              | 2230                        | 212                         | 54                              |                                      | 266                     | 66.38                          | 80                  |                         |                            |                        |                        |                           |                                       |                                    |                             |                                         |                                           |                           | 3                                       | 3                    | 1                | Wang Dexiu     | 1              |
| 11               | 1971 | Wang Zuoqi                        | poor peasant         | 4              |                                   |       |                               | 1883                   | 393                         | 2276               |                             | 2276                       |                              | 2276                        | 212                         | 55                              |                                      | 267                     | 66.656                         | 80                  |                         |                            |                        |                        |                           |                                       |                                    |                             |                                         |                                           |                           | 2                                       | 3                    | 1                | Wang Dexiu     | 1              |
| 12               | 1971 | Kaiying's mother                  | poor peasant         | 1              |                                   |       |                               | 388                    | 151                         | 539                |                             | 539                        |                              | 539                         | 53                          | 13                              |                                      | 66                      | 65.936                         | 20                  |                         |                            |                        |                        |                           |                                       |                                    |                             |                                         |                                           |                           | 2                                       | 3                    | 1                | Wang Dexiu     | 1              |
| 13               | 1971 | Zhaoxiang's mother                | landlord             | 1              |                                   |       |                               | 46                     | 59                          | 105                |                             | 105                        |                              | 105                         | 53                          | 3                               |                                      | 56                      | 55.52                          | 20                  |                         |                            |                        |                        |                           |                                       |                                    |                             |                                         |                                           |                           | 2                                       | 1                    | 1                | Wang Dexiu     | 1              |
| 14               | 1971 | Feng Kailing                      | landlord             | 3              |                                   |       |                               | 1862                   | 177                         | 2039               |                             | 2039                       |                              | 2039                        | 159                         | 49                              |                                      | 208                     | 69.312                         | 60                  |                         |                            |                        |                        |                           |                                       |                                    |                             |                                         |                                           |                           | 3                                       | 1                    | 1                | Wang Dexiu     | 1              |
| 15               | 1971 | Feng Zhaorui                      | landlord             | 6              |                                   |       |                               | 3418                   | 436                         | 3854               |                             | 3854                       |                              | 3854                        | 318                         | 92                              |                                      | 410                     | 68.416                         | 120                 |                         |                            |                        |                        |                           |                                       |                                    |                             |                                         |                                           |                           | 3                                       | 1                    | 1                | Wang Dexiu     | 1              |
| 16               | 1971 | Wang Zuozhen                      | poor peasant         | 3              |                                   |       |                               | 1057                   | 94                          | 1151               |                             | 1151                       |                              | 1151                        | 159                         | 28                              |                                      | 187                     | 62.208                         | 60                  |                         |                            |                        |                        |                           |                                       |                                    |                             |                                         |                                           |                           | 2                                       | 3                    | 1                | Wang Dexiu     | 1              |
| 17               | 1971 | Chen Xuezhong                     | poor peasant         | 2              |                                   |       |                               | 1352                   | 232                         | 1584               |                             | 1584                       |                              | 1584                        | 106                         | 37                              |                                      | 143                     | 71.5                           | 40                  |                         |                            |                        |                        |                           |                                       |                                    |                             |                                         |                                           |                           | 2                                       | 3                    | 1                | Wang Dexiu     | 1              |
| 18               | 1971 | Feng Baojin                       | poor peasant         | 3              |                                   |       |                               | 497                    | 229                         | 726                |                             | 726                        | 800                          | 1526                        | 159                         | 37                              |                                      | 196                     | 65.208                         | 60                  |                         |                            |                        |                        |                           |                                       |                                    |                             |                                         |                                           |                           | 2                                       | 3                    | 1                | Wang Dexiu     | 1              |
| 19               | 1971 | Feng Xianzhong                    | poor peasant         | 3              |                                   |       |                               | 1659                   | 242                         | 1901               |                             | 1901                       |                              | 1901                        | 159                         | 46                              |                                      | 205                     | 68.208                         | 60                  |                         |                            |                        |                        |                           |                                       |                                    |                             |                                         |                                           |                           | 3                                       | 3                    | 1                | Wang Dexiu     | 1              |
| 20               | 1971 | Feng Kaiyuan                      | poor peasant         | 6              |                                   |       |                               | 1818                   | 483                         | 2301               |                             | 2301                       |                              | 2301                        | 318                         | 55                              |                                      | 373                     | 62.204                         | 120                 |                         |                            |                        |                        |                           |                                       |                                    |                             |                                         |                                           |                           | 2                                       | 3                    | 1                | Wang Dexiu     | 1              |
| 21               | 1971 | Feng Kaiwu                        | poor peasant         | 7              |                                   |       |                               | 4264                   | 389                         | 4653               |                             | 4653                       |                              | 4653                        | 371                         | 112                             |                                      | 483                     | 68.953143                      | 140                 |                         |                            |                        |                        |                           |                                       |                                    |                             |                                         |                                           |                           | 3                                       | 3                    | 1                | Wang Dexiu     | 1              |
| 22               | 1971 | Feng Kaiwen                       | poor peasant         | 8              |                                   |       |                               | 4968                   | 647                         | 5615               |                             | 5615                       |                              | 5615                        | 424                         | 135                             |                                      | 559                     | 69.845                         | 160                 |                         |                            |                        |                        |                           |                                       |                                    |                             |                                         |                                           |                           | 2                                       | 3                    | 1                | Wang Dexiu     | 1              |
| 23               | 1971 | Kou Huaisheng                     | poor peasant         | 7              |                                   |       |                               | 2741                   | 383                         | 3124               |                             | 3124                       |                              | 3124                        | 371                         | 75                              |                                      | 446                     | 63.710857                      | 140                 |                         |                            |                        |                        |                           |                                       |                                    |                             |                                         |                                           |                           | 2                                       | 3                    | 1                | Wang Dexiu     | 1              |
| 24               | 1971 | Anming's mother                   | landlord             | 1              |                                   |       |                               | 431                    | 84                          | 515                |                             | 515                        |                              | 515                         | 53                          | 12                              |                                      | 65                      | 65.36                          | 20                  |                         |                            |                        |                        |                           |                                       |                                    |                             |                                         |                                           |                           | 2                                       | 1                    | 1                | Wang Dexiu     | 1              |

(cont.)

| Household number | Year | Name of the head of the household | Family class status  | Family members | Family characters | Labor | Number of standard population | Work points settlement |                             |                    |                             | Grain distribution         |                              |                             |                             |                                 | Firewood distribution | Work points income (Yuan)            |                         |                                |                     | Deducted amount (Yuan)  |                            |             |                        |                           | Distribution results (Yuan) | Distribution results (Yuan)           |                                    |                      |                                         | Guanxi                                    |                           |                                         |                      |                  |                |                |
|------------------|------|-----------------------------------|----------------------|----------------|-------------------|-------|-------------------------------|------------------------|-----------------------------|--------------------|-----------------------------|----------------------------|------------------------------|-----------------------------|-----------------------------|---------------------------------|-----------------------|--------------------------------------|-------------------------|--------------------------------|---------------------|-------------------------|----------------------------|-------------|------------------------|---------------------------|-----------------------------|---------------------------------------|------------------------------------|----------------------|-----------------------------------------|-------------------------------------------|---------------------------|-----------------------------------------|----------------------|------------------|----------------|----------------|
|                  |      |                                   |                      |                |                   |       |                               | Laboring work points   | Farmyard manure work points | Sum of work points | subsidy work points by cash | Sum of work points by cash | Subsidy work points by grain | Sum of work points by grain | Grain distribution: rations | Grain distribution: work points |                       | Grain distribution: subsidized grain | Grain distribution: sum | Grain distribution: per capita | Income: work points | Income: welfare subsidy | Income: prepaied overdraft | Income: sum | Deducted amount: grain | Deducted amount: firewood |                             | Deducted amount: other things in kind | Deducted amount: withdraw advances | Deducted amount: sum | Distribution results: personal solution | Distribution results: collective solution | Distribution results: sum | Interpersonal relationship with leaders | Family class status2 | Number of leader | Name of leader | Term of office |
|                  |      |                                   |                      |                |                   |       |                               |                        |                             |                    |                             |                            |                              |                             |                             |                                 |                       |                                      |                         |                                |                     |                         |                            |             |                        |                           |                             |                                       |                                    |                      |                                         |                                           |                           |                                         |                      |                  |                |                |
| 25               | 1971 | Wang Xiujuan                      | poor peasant         | 4              |                   |       |                               | 2399                   | 297                         | 2696               |                             | 2696                       |                              | 2696                        | 212                         | 63                              |                       | 275                                  | 68.75                   | 80                             |                     |                         |                            |             |                        |                           |                             |                                       |                                    |                      |                                         |                                           |                           | 3                                       | 3                    | 1                | Wang Dexiu     | 1              |
| 26               | 1971 | Feng Zhaobu                       | middle-class peasant | 4              |                   |       |                               | 620                    | 260                         | 880                | 795                         | 1675                       | 795                          | 2470                        | 212                         | 59                              |                       | 271                                  | 67.82                   | 80                             |                     |                         |                            |             |                        |                           |                             |                                       |                                    |                      |                                         |                                           |                           | 2                                       | 2                    | 1                | Wang Dexiu     | 1              |
| 27               | 1971 | Feng Zhaohuan                     | middle-class peasant | 5              |                   |       |                               | 1559                   | 167                         | 1726               |                             | 1726                       |                              | 1726                        | 265                         | 41                              |                       | 306                                  | 61.2848                 | 100                            |                     |                         |                            |             |                        |                           |                             |                                       |                                    |                      |                                         |                                           |                           | 3                                       | 2                    | 1                | Wang Dexiu     | 1              |
| 28               | 1971 | Zhaohuan's mother                 | middle-class peasant | 1              |                   |       |                               | 540                    | 0                           | 540                |                             | 540                        |                              | 540                         | 53                          | 13                              |                       | 66                                   | 65.96                   | 20                             |                     |                         |                            |             |                        |                           |                             |                                       |                                    |                      |                                         |                                           |                           | 2                                       | 2                    | 1                | Wang Dexiu     | 1              |
| 29               | 1971 | Feng Kaijun                       | poor peasant         | 10             |                   |       |                               | 4340                   | 648                         | 4988               |                             | 4988                       |                              | 4988                        | 530                         | 117                             |                       | 647                                  | 64.7                    | 200                            |                     |                         |                            |             |                        |                           |                             |                                       |                                    |                      |                                         |                                           |                           | 3                                       | 3                    | 1                | Wang Dexiu     | 1              |
| 30               | 1971 | Feng Kaizheng                     | poor peasant         | 8              |                   |       |                               | 2979                   | 373                         | 3352               | 1050                        | 4402                       |                              | 4402                        | 424                         | 99                              |                       | 523                                  | 65.375                  | 160                            |                     |                         |                            |             |                        |                           |                             |                                       |                                    |                      |                                         |                                           |                           | 3                                       | 3                    | 1                | Wang Dexiu     | 1              |
| 31               | 1971 | Feng Zhaoxin                      | poor peasant         | 8              |                   |       |                               | 2759                   | 446                         | 3205               | 1200                        | 4405                       |                              | 4405                        | 424                         | 104                             |                       | 528                                  | 66                      | 160                            |                     |                         |                            |             |                        |                           |                             |                                       |                                    |                      |                                         |                                           |                           | 3                                       | 3                    | 1                | Wang Dexiu     | 1              |
| 32               | 1971 | Wang Xiangyun                     | middle-class peasant | 6              |                   |       |                               | 2747                   | 356                         | 3103               |                             | 3103                       |                              | 3103                        | 318                         | 73                              |                       | 391                                  | 65.166667               | 120                            |                     |                         |                            |             |                        |                           |                             |                                       |                                    |                      |                                         |                                           |                           | 3                                       | 2                    | 1                | Wang Dexiu     | 1              |
| 33               | 1971 | Wang Xuewen                       | middle-class peasant | 3              |                   |       |                               | 1918                   | 392                         | 2310               |                             | 2310                       |                              | 2310                        | 159                         | 55                              |                       | 214                                  | 71.48                   | 60                             |                     |                         |                            |             |                        |                           |                             |                                       |                                    |                      |                                         |                                           |                           | 3                                       | 2                    | 1                | Wang Dexiu     | 1              |
| 34               | 1971 | Feng Xiuchang                     | middle-class peasant | 2              |                   |       |                               | 1001                   | 97                          | 1098               |                             | 1098                       |                              | 1098                        | 106                         | 26                              |                       | 132                                  | 66.176                  | 40                             |                     |                         |                            |             |                        |                           |                             |                                       |                                    |                      |                                         |                                           |                           | 3                                       | 2                    | 1                | Wang Dexiu     | 1              |
| 35               | 1971 | Feng Xianhua                      | middle-class peasant | 2              |                   |       |                               | 1407                   | 363                         | 1770               |                             | 1770                       |                              | 1770                        | 106                         | 42                              |                       | 148                                  | 74.24                   | 40                             |                     |                         |                            |             |                        |                           |                             |                                       |                                    |                      |                                         |                                           |                           | 3                                       | 2                    | 1                | Wang Dexiu     | 1              |
| 36               | 1971 | Feng Xiaoxi                       | middle-class peasant | 5              |                   |       |                               | 2122                   | 300                         | 2422               |                             | 2422                       |                              | 2422                        | 265                         | 58                              |                       | 323                                  | 64.6256                 | 100                            |                     |                         |                            |             |                        |                           |                             |                                       |                                    |                      |                                         |                                           |                           | 3                                       | 2                    | 1                | Wang Dexiu     | 1              |
| 37               | 1971 | Feng Xiangui                      | middle-class peasant | 6              |                   |       |                               | 1015                   | 500                         | 1515               |                             | 1515                       |                              | 1515                        | 318                         | 36                              |                       | 354                                  | 59.06                   | 120                            |                     |                         |                            |             |                        |                           |                             |                                       |                                    |                      |                                         |                                           |                           | 3                                       | 2                    | 1                | Wang Dexiu     | 1              |
| 38               | 1971 | Feng Xianzhen                     | middle-class peasant | 5              |                   |       |                               | 2651                   | 466                         | 3117               |                             | 3117                       |                              | 3117                        | 265                         | 73                              |                       | 338                                  | 67.6                    | 100                            |                     |                         |                            |             |                        |                           |                             |                                       |                                    |                      |                                         |                                           |                           | 2                                       | 2                    | 1                | Wang Dexiu     | 1              |
| 39               | 1971 | Feng Xianxue                      | middle-class peasant | 4              |                   |       |                               | 1992                   | 184                         | 2176               |                             | 2176                       |                              | 2176                        | 212                         | 51                              |                       | 263                                  | 65.75                   | 80                             |                     |                         |                            |             |                        |                           |                             |                                       |                                    |                      |                                         |                                           |                           | 1                                       | 2                    | 1                | Wang Dexiu     | 1              |
| 40               | 1971 | Wang Tingpin                      | poor peasant         | 2              |                   |       |                               | 1408                   | 237                         | 1645               |                             | 1645                       |                              | 1645                        | 106                         | 39                              |                       | 145                                  | 72.74                   | 40                             |                     |                         |                            |             |                        |                           |                             |                                       |                                    |                      |                                         |                                           |                           | 1                                       | 3                    | 1                | Wang Dexiu     | 1              |
| 41               | 1971 | Wang Zhengfen                     | middle-class peasant | 3              |                   |       |                               | 1553                   | 303                         | 1856               |                             | 1856                       |                              | 1856                        | 159                         | 44                              |                       | 203                                  | 67.666667               | 60                             |                     |                         |                            |             |                        |                           |                             |                                       |                                    |                      |                                         |                                           |                           | 1                                       | 2                    | 1                | Wang Dexiu     | 1              |
| 42               | 1971 | Wu Zongxiu                        | middle-class peasant | 2              |                   |       |                               | 1504                   | 185                         | 1689               |                             | 1689                       |                              | 1689                        | 106                         | 40                              |                       | 146                                  | 73                      | 40                             |                     |                         |                            |             |                        |                           |                             |                                       |                                    |                      |                                         |                                           |                           | 3                                       | 2                    | 1                | Wang Dexiu     | 1              |

(cont.)

| Household number | Year | Name of the head of the household | Family class status  | Family members | Family characters | Labor | Number of standard population | Work points settlement |                             |                    |                             |                            | Grain distribution           |                             |                             |                                 |                                      | Firewood distribution | Work points income (Yuan) |                                |                     |                         | Deducted amount (Yuan)     |             |                        |                           |                                       | Distribution results (Yuan) | Distribution results (Yuan)        |                      |                                         |                                           | Guanxi                    |                                         |                      |                  |                |                |
|------------------|------|-----------------------------------|----------------------|----------------|-------------------|-------|-------------------------------|------------------------|-----------------------------|--------------------|-----------------------------|----------------------------|------------------------------|-----------------------------|-----------------------------|---------------------------------|--------------------------------------|-----------------------|---------------------------|--------------------------------|---------------------|-------------------------|----------------------------|-------------|------------------------|---------------------------|---------------------------------------|-----------------------------|------------------------------------|----------------------|-----------------------------------------|-------------------------------------------|---------------------------|-----------------------------------------|----------------------|------------------|----------------|----------------|
|                  |      |                                   |                      |                |                   |       |                               | Laboring work points   | Farmyard manure work points | Sum of work points | subsidy work points by cash | Sum of work points by cash | Subsidy work points by grain | Sum of work points by grain | Grain distribution: rations | Grain distribution: work points | Grain distribution: subsidized grain |                       | Grain distribution: sum   | Grain distribution: per capita | Income: work points | Income: welfare subsidy | Income: prepaied overdraft | Income: sum | Deducted amount: grain | Deducted amount: firewood | Deducted amount: other things in kind |                             | Deducted amount: withdraw advances | Deducted amount: sum | Distribution results: personal solution | Distribution results: collective solution | Distribution results: sum | Interpersonal relationship with leaders | Family class status2 | Number of leader | Name of leader | Term of office |
|                  |      |                                   |                      |                |                   |       |                               |                        |                             |                    |                             |                            |                              |                             |                             |                                 |                                      |                       |                           |                                |                     |                         |                            |             |                        |                           |                                       |                             |                                    |                      |                                         |                                           |                           |                                         |                      |                  |                |                |
| 43               | 1971 | Wang Depo                         | poor peasant         | 6              |                   |       |                               | 2183                   | 203                         | 2386               |                             | 2386                       |                              | 2386                        | 318                         | 56                              |                                      | 374                   | 62.333333                 | 120                            |                     |                         |                            |             |                        |                           |                                       |                             |                                    |                      |                                         |                                           | 1                         | 3                                       | 1                    | Wang Dexiu       | 1              |                |
| 45               | 1971 | Wang Dekuan                       | poor peasant         | 3              |                   |       |                               | 1570                   | 0                           | 1570               |                             | 1570                       |                              | 1570                        | 159                         | 37                              |                                      | 196                   | 65.333333                 | 60                             |                     |                         |                            |             |                        |                           |                                       |                             |                                    |                      |                                         |                                           | 1                         | 3                                       | 1                    | Wang Dexiu       | 1              |                |
| 46               | 1971 | Wang Tingzhen                     | poor peasant         | 6              |                   |       |                               | 1061                   | 463                         | 1524               | 1900                        | 3424                       |                              | 3424                        | 318                         | 80                              |                                      | 398                   | 66.333333                 | 120                            |                     |                         |                            |             |                        |                           |                                       |                             |                                    |                      |                                         |                                           | 1                         | 3                                       | 1                    | Wang Dexiu       | 1              |                |
| 47               | 1971 | Wang Tingjian                     | poor peasant         | 6              |                   |       |                               | 5604                   | 450                         | 6054               |                             | 6054                       |                              | 6054                        | 318                         | 142                             |                                      | 460                   | 76.666667                 | 120                            |                     |                         |                            |             |                        |                           |                                       |                             |                                    |                      |                                         |                                           | 1                         | 3                                       | 1                    | Wang Dexiu       | 1              |                |
| 48               | 1971 | Wang Zhengcai                     | poor peasant         | 7              |                   |       |                               | 3448                   | 484                         | 3932               |                             | 3932                       |                              | 3932                        | 371                         | 92                              |                                      | 463                   | 66.142857                 | 140                            |                     |                         |                            |             |                        |                           |                                       |                             |                                    |                      |                                         |                                           | 2                         | 3                                       | 1                    | Wang Dexiu       | 1              |                |
| 49               | 1971 | Wang Zhengxuan                    | poor peasant         | 5              |                   |       |                               | 2617                   | 450                         | 3067               |                             | 3067                       |                              | 3067                        | 265                         | 71                              |                                      | 336                   | 67.2                      | 100                            |                     |                         |                            |             |                        |                           |                                       |                             |                                    |                      |                                         |                                           | 2                         | 3                                       | 1                    | Wang Dexiu       | 1              |                |
| 50               | 1971 | Chao Jingzhi                      | poor peasant         | 6              |                   |       |                               | 3749                   | 382                         | 4131               |                             | 4131                       |                              | 4131                        | 318                         | 97                              |                                      | 415                   | 69.166667                 | 120                            |                     |                         |                            |             |                        |                           |                                       |                             |                                    |                      |                                         |                                           | 2                         | 3                                       | 1                    | Wang Dexiu       | 1              |                |
| 52               | 1971 | Wang Zhengyan                     | poor peasant         | 3              |                   |       |                               | 2165                   | 280                         | 2445               |                             | 2445                       |                              | 2445                        | 159                         | 57                              |                                      | 216                   | 72                        | 60                             |                     |                         |                            |             |                        |                           |                                       |                             |                                    |                      |                                         |                                           | 3                         | 3                                       | 1                    | Wang Dexiu       | 1              |                |
| 53               | 1971 | Wang Zhengkuan                    | poor peasant         | 7              |                   |       |                               | 3269                   | 386                         | 3655               |                             | 3655                       |                              | 3655                        | 371                         | 86                              |                                      | 457                   | 65.285714                 | 140                            |                     |                         |                            |             |                        |                           |                                       |                             |                                    |                      |                                         |                                           | 1                         | 3                                       | 1                    | Wang Dexiu       | 1              |                |
| 54               | 1971 | Wang Zhenggui                     | poor peasant         | 6              |                   |       |                               | 3480                   | 345                         | 3825               |                             | 3825                       |                              | 3825                        | 318                         | 90                              |                                      | 408                   | 68                        | 120                            |                     |                         |                            |             |                        |                           |                                       |                             |                                    |                      |                                         |                                           | 3                         | 3                                       | 1                    | Wang Dexiu       | 1              |                |
| 55               | 1971 | Wang Tingxiang                    | poor peasant         | 2              |                   |       |                               | 1044                   | 0                           | 1044               |                             | 1044                       |                              | 1044                        | 106                         | 25                              |                                      | 131                   | 65.5                      | 40                             |                     |                         |                            |             |                        |                           |                                       |                             |                                    |                      |                                         |                                           | 2                         | 3                                       | 1                    | Wang Dexiu       | 1              |                |
| 56               | 1971 | Wang Deshan                       | poor peasant         | 5              |                   |       |                               | 997                    | 576                         | 1573               |                             | 1573                       |                              | 1573                        | 265                         | 47                              |                                      | 312                   | 62.4                      | 100                            |                     |                         |                            |             |                        |                           |                                       |                             |                                    |                      |                                         |                                           | 2                         | 3                                       | 1                    | Wang Dexiu       | 1              |                |
| 57               | 1971 | Wang Deling                       | poor peasant         | 5              |                   |       |                               | 928                    | 347                         | 1275               |                             | 1275                       |                              | 1275                        | 265                         | 30                              |                                      | 295                   | 59                        | 100                            |                     |                         |                            |             |                        |                           |                                       |                             |                                    |                      |                                         |                                           | 2                         | 3                                       | 1                    | Wang Dexiu       | 1              |                |
| 58               | 1971 | Wang Deli                         | poor peasant         | 8              |                   |       |                               | 2991                   | 689                         | 3680               | 1800                        | 5480                       |                              | 5480                        | 424                         | 128                             |                                      | 552                   | 69                        | 160                            |                     |                         |                            |             |                        |                           |                                       |                             |                                    |                      |                                         |                                           | 1                         | 3                                       | 1                    | Wang Dexiu       | 1              |                |
| 59               | 1971 | Wang Dexiu                        | poor peasant         | 2              |                   |       |                               | 1820                   | 186                         | 2006               |                             | 2006                       |                              | 2006                        | 106                         | 47                              |                                      | 153                   | 76.5                      | 40                             |                     |                         |                            |             |                        |                           |                                       |                             |                                    |                      |                                         |                                           | 1                         | 3                                       | 1                    | Wang Dexiu       | 1              |                |
| 60               | 1971 | Feng Zhaoyuan                     | poor peasant         | 1              |                   |       |                               | 800                    | 0                           | 800                |                             | 800                        |                              | 800                         | 53                          | 19                              |                                      | 72                    | 72                        | 20                             |                     |                         |                            |             |                        |                           |                                       |                             |                                    |                      |                                         |                                           | 3                         | 3                                       | 1                    | Wang Dexiu       | 1              |                |
| 61               | 1971 | Ge Zhengxian                      | poor peasant         | 1              |                   |       |                               | 900                    | 0                           | 900                |                             | 900                        |                              | 900                         | 53                          | 21                              |                                      | 74                    | 74                        | 20                             |                     |                         |                            |             |                        |                           |                                       |                             |                                    |                      |                                         |                                           | 3                         | 3                                       | 1                    | Wang Dexiu       | 1              |                |
| 62               | 1971 | Niu Aiqin                         | educated youth       | 1              | educated youth    |       |                               | 1391                   | 61                          | 1452               |                             | 1452                       |                              | 1452                        | 53                          | 34                              |                                      | 87                    | 87                        | 20                             |                     |                         |                            |             |                        |                           |                                       |                             |                                    |                      |                                         |                                           | 2                         | 4                                       | 1                    | Wang Dexiu       | 1              |                |
| 63               | 1971 | Wu Jihua                          | educated youth       | 1              | educated youth    |       |                               | 1387                   | 61                          | 1448               |                             | 1448                       |                              | 1448                        | 53                          | 34                              |                                      | 87                    | 87                        | 20                             |                     |                         |                            |             |                        |                           |                                       |                             |                                    |                      |                                         |                                           | 2                         | 4                                       | 1                    | Wang Dexiu       | 1              |                |
| 64               | 1971 | Ge Dongping                       | educated youth       | 2              | educated youth    |       |                               | 2402                   | 122                         | 2524               |                             | 2524                       |                              | 2524                        | 106                         | 59                              |                                      | 165                   | 82.5                      | 40                             |                     |                         |                            |             |                        |                           |                                       |                             |                                    |                      |                                         |                                           | 2                         | 4                                       | 1                    | Wang Dexiu       | 1              |                |
| 65               | 1971 | Ge Huihui                         | educated youth       | 1              | educated youth    |       |                               | 0                      | 0                           | 0                  |                             | 0                          |                              | 0                           | 0                           | 0                               |                                      | 0                     | 0                         | 0                              |                     |                         |                            |             |                        |                           |                                       |                             |                                    |                      |                                         |                                           | 2                         | 4                                       | 1                    | Wang Dexiu       | 1              |                |
| 68               | 1971 | Ma Lianjun                        | middle-class peasant | 8              |                   |       |                               | 2480                   | 359                         | 2839               |                             | 2839                       |                              | 2839                        | 424                         | 68                              |                                      | 492                   | 61.517                    | 160                            |                     |                         |                            |             |                        |                           |                                       |                             |                                    |                      |                                         |                                           | 2                         | 2                                       | 1                    | Wang Dexiu       | 1              |                |
| 111              | 1971 | Wang Tingfeng                     |                      | 3              |                   |       |                               | 1407                   | 266                         | 1673               |                             | 1673                       |                              | 1673                        | 159                         | 39                              |                                      | 198                   | 66                        | 60                             |                     |                         |                            |             |                        |                           |                                       |                             |                                    |                      |                                         |                                           | 2                         |                                         | 1                    | Wang Dexiu       | 1              |                |
| 120              | 1971 | Wang Changzhi                     |                      | 1              |                   |       |                               | 773                    | 0                           | 773                |                             | 773                        |                              | 773                         | 0                           | 18                              |                                      | 18                    | 18                        | 0                              |                     |                         |                            |             |                        |                           |                                       |                             |                                    |                      |                                         |                                           | 2                         |                                         | 1                    | Wang Dexiu       | 1              |                |
| 348              | 1971 | Feng Xianming                     | landlord             | 2              |                   |       |                               | 1064                   | 325                         | 1389               |                             | 1389                       |                              | 1389                        | 106                         | 33                              |                                      | 139                   | 69.668                    | 40                             |                     |                         |                            |             |                        |                           |                                       |                             |                                    |                      |                                         |                                           | 2                         | 1                                       | 1                    | Wang Dexiu       | 1              |                |

(cont.)

| Household number | Year | Name of the head of the household | Family class status  | Family members | Family characters                 | Labor | Number of standard population | Work points settlement |                             |                    |                             |                            | Grain distribution           |                             |                             |                                 |                                      | Firewood distribution | Work points income (Yuan) |                                |                     |                         | Deducted amount (Yuan)     |             |                        |                           |                                       | Distribution results (Yuan) | Distribution results (Yuan)        |                      |                                         | Guanxi                                    |                           |                                         |                      |                  |                |                |
|------------------|------|-----------------------------------|----------------------|----------------|-----------------------------------|-------|-------------------------------|------------------------|-----------------------------|--------------------|-----------------------------|----------------------------|------------------------------|-----------------------------|-----------------------------|---------------------------------|--------------------------------------|-----------------------|---------------------------|--------------------------------|---------------------|-------------------------|----------------------------|-------------|------------------------|---------------------------|---------------------------------------|-----------------------------|------------------------------------|----------------------|-----------------------------------------|-------------------------------------------|---------------------------|-----------------------------------------|----------------------|------------------|----------------|----------------|
|                  |      |                                   |                      |                |                                   |       |                               | Laboring work points   | Farmyard manure work points | Sum of work points | subsidy work points by cash | Sum of work points by cash | Subsidy work points by grain | Sum of work points by grain | Grain distribution: rations | Grain distribution: work points | Grain distribution: subsidized grain |                       | Grain distribution: sum   | Grain distribution: per capita | Income: work points | Income: welfare subsidy | Income: prepaied overdraft | Income: sum | Deducted amount: grain | Deducted amount: firewood | Deducted amount: other things in kind |                             | Deducted amount: withdraw advances | Deducted amount: sum | Distribution results: personal solution | Distribution results: collective solution | Distribution results: sum | Interpersonal relationship with leaders | Family class status2 | Number of leader | Name of leader | Term of office |
|                  |      |                                   |                      |                |                                   |       |                               |                        |                             |                    |                             |                            |                              |                             |                             |                                 |                                      |                       |                           |                                |                     |                         |                            |             |                        |                           |                                       |                             |                                    |                      |                                         |                                           |                           |                                         |                      |                  |                |                |
| 1                | 1972 | Ma Zhenqi                         | middle-class peasant | 2              |                                   |       |                               | 1276                   | 585                         | 1861               |                             | 1861                       |                              | 1861                        | 650                         | 123                             |                                      | 773                   | 386.413                   | 772.826                        | 74.44               |                         |                            | 86.56       | 15.45652               | 0.38                      |                                       | 102.39303                   | -27.95                             |                      |                                         | 3                                         | 2                         | 2                                       | Zhang Lianrong       | 2                |                |                |
| 2                | 1972 | Wang Xinming                      | middle-class peasant | 8              |                                   |       |                               | 4407                   | 2348                        | 6755               |                             | 6755                       |                              | 6755                        | 2600                        | 446                             |                                      | 3046                  | 380.72875                 | 3045.83                        | 270.2               |                         |                            | 341.13      | 60.9166                | 1.56                      |                                       | 403.60956                   | -133.41                            |                      |                                         | 1                                         | 2                         | 2                                       | Zhang Lianrong       | 2                |                |                |
| 3                | 1972 | Feng Kaiying                      | poor peasant         | 5              |                                   |       |                               | 3559                   | 2219                        | 5778               |                             | 5778                       |                              | 5778                        | 1625                        | 381                             |                                      | 2006                  | 401.2696                  | 2006.348                       | 231.12              |                         |                            | 224.71      | 40.12696               | 1.2                       |                                       | 266.03794                   | -34.92                             |                      |                                         | 3                                         | 3                         | 2                                       | Zhang Lianrong       | 2                |                |                |
| 4                | 1972 | Wang Tinglan                      | poor peasant         | 3              |                                   |       |                               | 5049                   | 429                         | 5478               |                             | 5478                       |                              | 5478                        | 975                         | 362                             |                                      | 1337                  | 445.516                   | 1336.548                       | 219.12              |                         |                            | 149.69      | 26.73096               | 0.97                      |                                       | 177.39434                   | 41.73                              |                      |                                         | 3                                         | 3                         | 2                                       | Zhang Lianrong       | 2                |                |                |
| 5                | 1972 | Wang Zuoliang                     | poor peasant         | 4              |                                   |       |                               | 3858                   | 683                         | 4541               |                             | 4541                       |                              | 4541                        | 1300                        | 300                             |                                      | 1600                  | 399.9265                  | 1599.706                       | 181.64              |                         |                            | 179.17      | 31.99412               | 0.98                      |                                       | 212.14119                   | -30.50                             |                      |                                         | 3                                         | 3                         | 2                                       | Zhang Lianrong       | 2                |                |                |
| 6                | 1972 | Wang Tingmei                      | poor peasant         | 6              |                                   |       |                               | 3332                   | 1727                        | 5059               |                             | 5059                       |                              | 5059                        | 1950                        | 334                             |                                      | 2284                  | 380.649                   | 2283.894                       | 202.36              |                         |                            | 255.80      | 45.67788               | 1.16                      |                                       | 302.63401                   | -100.27                            |                      |                                         | 3                                         | 3                         | 2                                       | Zhang Lianrong       | 2                |                |                |
| 7                | 1972 | Wang Tingxi                       | poor peasant         | 4              |                                   |       |                               | 3777                   | 209                         | 3986               |                             | 3986                       |                              | 3986                        | 1300                        | 263                             |                                      | 1563                  | 390.769                   | 1563.076                       | 159.44              |                         |                            | 175.06      | 31.26152               | 0.83                      |                                       | 207.15603                   | -47.72                             |                      |                                         | 2                                         | 3                         | 2                                       | Zhang Lianrong       | 2                |                |                |
| 8                | 1972 | Tingxi's Mother                   | poor peasant         | 1              | families of revolutionary martyrs |       |                               | 0                      | 0                           | 0                  | 1480                        | 1480                       |                              | 1480                        | 325                         | 98                              |                                      | 423                   | 422.68                    | 422.68                         | 59.2                |                         |                            | 47.34       | 8.4536                 | 0.24                      |                                       | 56.03376                    | 3.17                               |                      |                                         | 2                                         | 3                         | 2                                       | Zhang Lianrong       | 2                |                |                |
| 9                | 1972 | Wang Tingzhi                      | poor peasant         | 2              |                                   |       |                               | 2026                   | 703                         | 2729               |                             | 2729                       |                              | 2729                        | 650                         | 180                             |                                      | 830                   | 415.057                   | 830.114                        | 109.16              |                         |                            | 92.97       | 16.60228               | 0.52                      |                                       | 110.09505                   | -0.94                              |                      |                                         | 3                                         | 3                         | 2                                       | Zhang Lianrong       | 2                |                |                |
| 10               | 1972 | Wang Zuoxing                      | poor peasant         | 3              |                                   |       |                               | 2953                   | 726                         | 3679               |                             | 3679                       |                              | 3679                        | 975                         | 243                             |                                      | 1218                  | 405.938                   | 1217.814                       | 147.16              |                         |                            | 136.40      | 24.35628               | 0.74                      |                                       | 161.49145                   | -14.33                             |                      |                                         | 3                                         | 3                         | 2                                       | Zhang Lianrong       | 2                |                |                |
| 11               | 1972 | Wang Zuoqi                        | poor peasant         | 4              |                                   |       |                               | 4126                   | 1163                        | 5289               |                             | 5289                       |                              | 5289                        | 1300                        | 349                             |                                      | 1649                  | 412.2685                  | 1649.074                       | 211.56              |                         |                            | 184.70      | 32.98148               | 1.04                      |                                       | 218.71777                   | -7.16                              |                      |                                         | 3                                         | 3                         | 2                                       | Zhang Lianrong       | 2                |                |                |
| 12               | 1972 | Kaiying's mother                  | poor peasant         | 1              |                                   |       |                               | 87                     | 1677                        | 1764               |                             | 1764                       |                              | 1764                        | 325                         | 116                             |                                      | 441                   | 441.424                   | 441.424                        | 70.56               |                         |                            | 49.44       | 8.82848                | 0.35                      |                                       | 58.617968                   | 11.94                              |                      |                                         | 2                                         | 3                         | 2                                       | Zhang Lianrong       | 2                |                |                |
| 13               | 1972 | Zhaoxiang's mother                | landlord             | 1              |                                   |       |                               | 60                     | 155                         | 215                |                             | 215                        |                              | 215                         | 325                         | 14                              |                                      | 339                   | 339.19                    | 339.19                         | 8.6                 |                         |                            | 37.99       | 6.7838                 | 0.12                      |                                       | 44.89308                    | -36.29                             |                      |                                         | 3                                         | 1                         | 2                                       | Zhang Lianrong       | 2                |                |                |
| 14               | 1972 | Feng Kailing                      | landlord             | 2              |                                   |       |                               | 3778                   | 396                         | 4174               |                             | 4174                       |                              | 4174                        | 650                         | 275                             |                                      | 925                   | 462.742                   | 925.484                        | 166.96              |                         |                            | 103.65      | 18.50968               | 0.69                      |                                       | 122.85389                   | 44.11                              |                      |                                         | 3                                         | 1                         | 2                                       | Zhang Lianrong       | 2                |                |                |
| 15               | 1972 | Feng Zhaorui                      | landlord             | 6              |                                   |       |                               | 7076                   | 922                         | 7998               |                             | 7998                       |                              | 7998                        | 1950                        | 528                             |                                      | 2478                  | 412.978                   | 2477.868                       | 319.92              |                         |                            | 277.52      | 49.55736               | 1.54                      |                                       | 328.61858                   | -8.70                              |                      |                                         | 3                                         | 1                         | 2                                       | Zhang Lianrong       | 2                |                |                |
| 16               | 1972 | Wang Zuozhen                      | poor peasant         | 3              |                                   |       |                               | 3375                   | 239                         | 3614               |                             | 3614                       |                              | 3614                        | 975                         | 239                             |                                      | 1214                  | 404.508                   | 1213.524                       | 144.56              |                         |                            | 135.91      | 24.27048               | 0.61                      |                                       | 160.79517                   | -16.24                             |                      |                                         | 1                                         | 3                         | 2                                       | Zhang Lianrong       | 2                |                |                |
| 17               | 1972 | Chen Xuezhong                     | poor peasant         | 2              |                                   |       |                               | 2838                   | 431                         | 3269               |                             | 3269                       |                              | 3269                        | 650                         | 216                             |                                      | 866                   | 432.877                   | 865.754                        | 130.76              |                         |                            | 96.96       | 17.31508               | 0.56                      |                                       | 114.83953                   | 15.92                              |                      |                                         | 1                                         | 3                         | 2                                       | Zhang Lianrong       | 2                |                |                |
| 18               | 1972 | Feng Baojin                       | poor peasant         | 3              |                                   |       |                               | 1660                   | 493                         | 2153               |                             | 2153                       | 1300                         | 3453                        | 975                         | 228                             |                                      | 1203                  | 400.966                   | 1202.898                       | 86.12               |                         |                            | 134.72      | 24.05796               | 0.59                      |                                       | 159.37254                   | -73.25                             |                      |                                         | 1                                         | 3                         | 2                                       | Zhang Lianrong       | 2                |                |                |
| 19               | 1972 | Feng Xianzhong                    | poor peasant         | 3              |                                   |       |                               | 2172                   | 1000                        | 3172               |                             | 3172                       |                              | 3172                        | 975                         | 209                             |                                      | 1184                  | 394.784                   | 1184.352                       | 126.88              |                         |                            | 132.65      | 23.68704               | 0.66                      |                                       | 156.99446                   | -30.11                             |                      |                                         | 3                                         | 3                         | 2                                       | Zhang Lianrong       | 2                |                |                |
| 20               | 1972 | Feng Kaiyuan                      | poor peasant         | 7              |                                   |       |                               | 2851                   | 2051                        | 4902               |                             | 4902                       |                              | 4902                        | 2275                        | 324                             |                                      | 2599                  | 371.21886                 | 2598.532                       | 196.08              |                         |                            | 291.04      | 51.97064               | 1.29                      |                                       | 344.29622                   | -148.22                            |                      |                                         | 3                                         | 3                         | 2                                       | Zhang Lianrong       | 2                |                |                |
| 21               | 1972 | Feng Kaiwu                        | poor peasant         | 8              |                                   |       |                               | 9224                   | 977                         | 10201              |                             | 10201                      |                              | 10201                       | 2600                        | 673                             |                                      | 3273                  | 409.15825                 | 3273.266                       | 408.04              |                         |                            | 366.61      | 65.46532               | 1.88                      |                                       | 433.95111                   | -25.91                             |                      |                                         | 2                                         | 3                         | 2                                       | Zhang Lianrong       | 2                |                |                |
| 22               | 1972 | Feng Kaiwen                       | poor peasant         | 8              |                                   |       |                               | 7408                   | 837                         | 8245               |                             | 8245                       |                              | 8245                        | 2600                        | 544                             |                                      | 3144                  | 393.02125                 | 3144.17                        | 329.8               |                         |                            | 352.15      | 62.8834                | 1.72                      |                                       | 416.75044                   | -86.95                             |                      |                                         | 3                                         | 3                         | 2                                       | Zhang Lianrong       | 2                |                |                |
| 23               | 1972 | Kou Huaisheng                     | poor peasant         | 7              |                                   |       |                               | 7121                   | 2207                        | 9328               |                             | 9328                       |                              | 9328                        | 2275                        | 616                             |                                      | 2891                  | 412.94971                 | 2890.648                       | 373.12              |                         |                            | 323.75      | 57.81296               | 1.8                       |                                       | 383.36554                   | -10.25                             |                      |                                         | 1                                         | 3                         | 2                                       | Zhang Lianrong       | 2                |                |                |
| 24               | 1972 | Anming's mother                   | landlord             | 1              |                                   |       |                               | 662                    | 301                         | 963                |                             | 963                        |                              | 963                         | 325                         | 64                              |                                      | 389                   | 388.558                   | 388.558                        | 38.52               |                         |                            | 43.52       | 7.77116                | 0.21                      |                                       | 51.499656                   | -12.98                             |                      |                                         | 3                                         | 1                         | 2                                       | Zhang Lianrong       | 2                |                |                |
| 25               | 1972 | Wang Xiujian                      | poor peasant         | 4              |                                   |       |                               | 4626                   | 678                         | 5304               |                             | 5304                       |                              | 5304                        | 1300                        | 350                             |                                      | 1650                  | 412.516                   | 1650.064                       | 212.16              |                         |                            | 184.81      | 33.00128               | 0.8                       |                                       | 218.60845                   | -6.45                              |                      |                                         | 3                                         | 3                         | 2                                       | Zhang Lianrong       | 2                |                |                |
| 26               | 1972 | Feng Zhaobu                       | middle-class peasant | 4              |                                   |       |                               | 661                    | 411                         | 1072               | 2080                        | 3152                       | 2080                         | 5232                        | 1300                        | 345                             |                                      | 1645                  | 411.328                   | 1645.312                       | 126.08              |                         |                            | 184.27      | 32.90624               | 0.84                      |                                       | 218.02118                   | -91.94                             |                      |                                         | 1                                         | 2                         | 2                                       | Zhang Lianrong       | 2                |                |                |

(cont.)

| Household number | Year | Name of the head of the household | Family class status  | Family members | Family characters | Labor | Number of standard population | Work points settlement |                             |                    |                             |                            | Grain distribution           |                             |                             |                                 |                                      | Firewood distribution | Work points income (Yuan) |                                |                     |                         | Deducted amount (Yuan)     |             |                        |                           |                                       | Distribution results (Yuan) | Distribution results (Yuan)        |                      |                                         |                                           | Guanxi                    |                                         |                      |                  |                |
|------------------|------|-----------------------------------|----------------------|----------------|-------------------|-------|-------------------------------|------------------------|-----------------------------|--------------------|-----------------------------|----------------------------|------------------------------|-----------------------------|-----------------------------|---------------------------------|--------------------------------------|-----------------------|---------------------------|--------------------------------|---------------------|-------------------------|----------------------------|-------------|------------------------|---------------------------|---------------------------------------|-----------------------------|------------------------------------|----------------------|-----------------------------------------|-------------------------------------------|---------------------------|-----------------------------------------|----------------------|------------------|----------------|
|                  |      |                                   |                      |                |                   |       |                               | Laboring work points   | Farmyard manure work points | Sum of work points | subsidy work points by cash | Sum of work points by cash | Subsidy work points by grain | Sum of work points by grain | Grain distribution: rations | Grain distribution: work points | Grain distribution: subsidized grain |                       | Grain distribution: sum   | Grain distribution: per capita | Income: work points | Income: welfare subsidy | Income: prepaied overdraft | Income: sum | Deducted amount: grain | Deducted amount: firewood | Deducted amount: other things in kind |                             | Deducted amount: withdraw advances | Deducted amount: sum | Distribution results: personal solution | Distribution results: collective solution | Distribution results: sum | Interpersonal relationship with leaders | Family class status2 | Number of leader | Name of leader |
| 27               | 1972 | Feng Zhaohuan                     | middle-class peasant | 5              |                   |       |                               | 3067                   | 421                         | 3488               |                             | 3488                       |                              | 3488                        | 1625                        | 230                             |                                      | 1855                  | 371.0416                  | 1855.208                       | 139.52              |                         | 207.78                     | 37.10416    | 0.83                   |                           | 245.71746                             | -106.20                     |                                    |                      | 3                                       | 2                                         | 2                         | Zhang Lianrong                          | 2                    |                  |                |
| 28               | 1972 | Zhaohuan's mother                 | middle-class peasant | 1              |                   |       |                               | 1261                   | 0                           | 1261               |                             | 1261                       |                              | 1261                        | 325                         | 83                              |                                      | 408                   | 408.226                   | 408.226                        | 50.44               |                         | 45.72                      | 8.16452     | 0.24                   |                           | 54.125832                             | -3.69                       |                                    |                      | 3                                       | 2                                         | 2                         | Zhang Lianrong                          | 2                    |                  |                |
| 29               | 1972 | Feng Kaijun                       | poor peasant         | 10             |                   |       |                               | 8842                   | 2171                        | 11013              |                             | 11013                      |                              | 11013                       | 3250                        | 727                             |                                      | 3977                  | 397.6858                  | 3976.858                       | 440.52              |                         | 445.41                     | 79.53716    | 2.3                    |                           | 527.24526                             | -86.73                      |                                    |                      | 3                                       | 3                                         | 2                         | Zhang Lianrong                          | 2                    |                  |                |
| 30               | 1972 | Feng Kaizheng                     | poor peasant         | 9              |                   |       |                               | 6722                   | 2040                        | 8762               | 2700                        | 11462                      |                              | 11462                       | 2925                        | 756                             |                                      | 3681                  | 409.05467                 | 3681.492                       | 458.48              |                         | 412.33                     | 73.62984    | 2.16                   |                           | 488.11694                             | -29.64                      |                                    |                      | 2                                       | 3                                         | 2                         | Zhang Lianrong                          | 2                    |                  |                |
| 31               | 1972 | Feng Zhaoxin                      | poor peasant         | 7              |                   |       |                               | 6580                   | 1659                        | 8239               | 650                         | 8889                       |                              | 8889                        | 2275                        | 587                             |                                      | 2862                  | 408.81057                 | 2861.674                       | 355.56              |                         | 320.51                     | 57.23348    | 1.63                   |                           | 379.37097                             | -23.81                      |                                    |                      | 3                                       | 3                                         | 2                         | Zhang Lianrong                          | 2                    |                  |                |
| 32               | 1972 | Wang Xiangyun                     | middle-class peasant | 6              |                   |       |                               | 5214                   | 2611                        | 7825               |                             | 7825                       |                              | 7825                        | 1950                        | 516                             |                                      | 2466                  | 411.075                   | 2466.45                        | 313                 |                         | 276.24                     | 49.329      | 1.57                   |                           | 327.1414                              | -14.14                      |                                    |                      | 3                                       | 2                                         | 2                         | Zhang Lianrong                          | 2                    |                  |                |
| 33               | 1972 | Wang Xuewen                       | middle-class peasant | 3              |                   |       |                               | 5057                   | 734                         | 5791               |                             | 5791                       |                              | 5791                        | 975                         | 382                             |                                      | 1357                  | 452.402                   | 1357.206                       | 231.64              |                         | 152.01                     | 27.14412    | 0.97                   |                           | 180.12119                             | 51.52                       |                                    |                      | 2                                       | 2                                         | 2                         | Zhang Lianrong                          | 2                    |                  |                |
| 34               | 1972 | Feng Xiuchang                     | middle-class peasant | 4              |                   |       |                               | 5931                   | 1072                        | 7003               |                             | 7003                       |                              | 7003                        | 1300                        | 594                             |                                      | 1894                  | 473.5                     | 1894                           | 280.12              |                         | 212.13                     | 37.88       | 1.06                   |                           | 251.068                               | 29.05                       |                                    |                      | 1                                       | 2                                         | 2                         | Zhang Lianrong                          | 2                    |                  |                |
| 35               | 1972 | Feng Xianhua                      | middle-class peasant | 2              |                   |       |                               | 840                    | 399                         | 1239               |                             | 1239                       |                              | 1239                        | 650                         | 82                              |                                      | 732                   | 365.887                   | 731.774                        | 49.56               |                         | 81.96                      | 14.63548    | 0.33                   |                           | 96.924168                             | -47.36                      |                                    |                      | 2                                       | 2                                         | 2                         | Zhang Lianrong                          | 2                    |                  |                |
| 36               | 1972 | Feng Xiaoxi                       | middle-class peasant | 5              |                   |       |                               | 5171                   | 549                         | 5720               |                             | 5720                       |                              | 5720                        | 1625                        | 378                             |                                      | 2003                  | 400.504                   | 2002.52                        | 228.8               |                         | 224.28                     | 40.0504     | 1.06                   |                           | 265.39264                             | -36.59                      |                                    |                      | 3                                       | 2                                         | 2                         | Zhang Lianrong                          | 2                    |                  |                |
| 37               | 1972 | Feng Xiangui                      | middle-class peasant | 7              |                   |       |                               | 2836                   | 1224                        | 4060               |                             | 4060                       |                              | 4060                        | 2275                        | 268                             |                                      | 2543                  | 363.28                    | 2542.96                        | 162.4               |                         | 284.81                     | 50.8592     | 1.16                   |                           | 336.83072                             | -174.43                     |                                    |                      | 2                                       | 2                                         | 2                         | Zhang Lianrong                          | 2                    |                  |                |
| 38               | 1972 | Feng Xianzhen                     | middle-class peasant | 5              |                   |       |                               | 6757                   | 1200                        | 7957               |                             | 7957                       |                              | 7957                        | 1625                        | 525                             |                                      | 2150                  | 430.0324                  | 2150.162                       | 318.28              |                         | 240.82                     | 43.00324    | 1.49                   |                           | 285.31138                             | 32.97                       |                                    |                      | 1                                       | 2                                         | 2                         | Zhang Lianrong                          | 2                    |                  |                |
| 39               | 1972 | Feng Xianxue                      | middle-class peasant | 4              |                   |       |                               | 3867                   | 522                         | 4389               | 300                         | 4689                       |                              | 4689                        | 1300                        | 309                             |                                      | 1609                  | 402.3685                  | 1609.474                       | 187.56              |                         | 180.26                     | 32.18948    | 0.82                   |                           | 213.27057                             | -25.71                      |                                    |                      | 1                                       | 2                                         | 2                         | Zhang Lianrong                          | 2                    |                  |                |
| 40               | 1972 | Wang Tingpin                      | poor peasant         | 2              |                   |       |                               | 3585                   | 734                         | 4319               |                             | 4319                       |                              | 4319                        | 650                         | 285                             |                                      | 935                   | 467.527                   | 935.054                        | 172.76              |                         | 104.73                     | 18.70108    | 0.68                   |                           | 124.10713                             | 48.65                       |                                    |                      | 1                                       | 3                                         | 2                         | Zhang Lianrong                          | 2                    |                  |                |
| 41               | 1972 | Wang Zhengfen                     | middle-class peasant | 3              |                   |       |                               | 3015                   | 1228                        | 4243               |                             | 4243                       |                              | 4243                        | 975                         | 280                             |                                      | 1255                  | 418.346                   | 1255.038                       | 169.72              |                         | 140.56                     | 25.10076    | 0.81                   |                           | 166.47502                             | 3.24                        |                                    |                      | 2                                       | 2                                         | 2                         | Zhang Lianrong                          | 2                    |                  |                |
| 42               | 1972 | Wu Zongxiu                        | middle-class peasant | 2              |                   |       |                               | 3606                   | 388                         | 3994               |                             | 3994                       |                              | 3994                        | 650                         | 264                             |                                      | 914                   | 456.802                   | 913.604                        | 159.76              |                         | 102.32                     | 18.27208    | 0.67                   |                           | 121.26573                             | 38.49                       |                                    |                      | 3                                       | 2                                         | 2                         | Zhang Lianrong                          | 2                    |                  |                |
| 43               | 1972 | Wang Depo                         | poor peasant         | 6              |                   |       |                               | 4403                   | 537                         | 4940               |                             | 4940                       |                              | 4940                        | 1950                        | 326                             |                                      | 2276                  | 379.34                    | 2276.04                        | 197.6               |                         | 254.92                     | 45.5208     | 1.11                   |                           | 301.54728                             | -103.95                     |                                    |                      | 1                                       | 3                                         | 2                         | Zhang Lianrong                          | 2                    |                  |                |
| 44               | 1972 | Wang Dexue                        | poor peasant         | 2              |                   |       |                               | 1003                   | 1931                        | 2934               |                             | 2934                       |                              | 2934                        | 650                         | 194                             |                                      | 844                   | 421.822                   | 843.644                        | 117.36              |                         | 94.49                      | 16.87288    | 0.57                   |                           | 111.93101                             | 5.43                        |                                    |                      | 1                                       | 3                                         | 2                         | Zhang Lianrong                          | 2                    |                  |                |
| 45               | 1972 | Wang Dekuan                       | poor peasant         | 3              |                   |       |                               | 2906                   | 0                           | 2906               |                             | 2906                       |                              | 2906                        | 975                         | 192                             |                                      | 1167                  | 388.932                   | 1166.796                       | 116.24              |                         | 130.68                     | 23.33592    | 0.6                    |                           | 154.61707                             | -38.38                      |                                    |                      | 1                                       | 3                                         | 2                         | Zhang Lianrong                          | 2                    |                  |                |

(cont.)

| Household number | Year | Name of the head of the household | Family class status  | Family members | Family characters | Labor | Number of standard population | Work points settlement |                             |                    |                             |                            | Grain distribution           |                             |                             |                                 |                                      | Firewood distribution | Work points income (Yuan) |                                |                     |                         | Deducted amount (Yuan)     |             |                        |                           |                                       | Distribution results (Yuan) | Distribution results (Yuan)        |                      |                                         | Guanxi                                    |                           |                                         |                      |                  |                |                |
|------------------|------|-----------------------------------|----------------------|----------------|-------------------|-------|-------------------------------|------------------------|-----------------------------|--------------------|-----------------------------|----------------------------|------------------------------|-----------------------------|-----------------------------|---------------------------------|--------------------------------------|-----------------------|---------------------------|--------------------------------|---------------------|-------------------------|----------------------------|-------------|------------------------|---------------------------|---------------------------------------|-----------------------------|------------------------------------|----------------------|-----------------------------------------|-------------------------------------------|---------------------------|-----------------------------------------|----------------------|------------------|----------------|----------------|
|                  |      |                                   |                      |                |                   |       |                               | Laboring work points   | Farmyard manure work points | Sum of work points | subsidy work points by cash | Sum of work points by cash | Subsidy work points by grain | Sum of work points by grain | Grain distribution: rations | Grain distribution: work points | Grain distribution: subsidized grain |                       | Grain distribution: sum   | Grain distribution: per capita | Income: work points | Income: welfare subsidy | Income: prepaied overdraft | Income: sum | Deducted amount: grain | Deducted amount: firewood | Deducted amount: other things in kind |                             | Deducted amount: withdraw advances | Deducted amount: sum | Distribution results: personal solution | Distribution results: collective solution | Distribution results: sum | Interpersonal relationship with leaders | Family class status2 | Number of leader | Name of leader | Term of office |
|                  |      |                                   |                      |                |                   |       |                               |                        |                             |                    |                             |                            |                              |                             |                             |                                 |                                      |                       |                           |                                |                     |                         |                            |             |                        |                           |                                       |                             |                                    |                      |                                         |                                           |                           |                                         |                      |                  |                |                |
| 46               | 1972 | Wang Tingzhen                     | poor peasant         | 6              | worker            |       |                               | 2397                   | 1067                        | 3464               | 4400                        | 7864                       |                              | 7864                        | 1950                        | 519                             |                                      | 2469                  | 411.504                   | 2469.024                       | 314.56              |                         | 276.53                     | 49.38048    | 0.9                    |                           | 326.81117                             | -12.25                      |                                    | 1                    | 3                                       | 2                                         | Zhang Lianrong            | 2                                       |                      |                  |                |                |
| 47               | 1972 | Wang Tingjian                     | poor peasant         | 7              |                   |       |                               | 12869                  | 1069                        | 13938              |                             | 13938                      |                              | 13938                       | 2275                        | 920                             |                                      | 3195                  | 456.41543                 | 3194.908                       | 557.52              |                         | 357.83                     | 63.89816    | 2.35                   |                           | 424.07786                             | 133.44                      |                                    | 1                    | 3                                       | 2                                         | Zhang Lianrong            | 2                                       |                      |                  |                |                |
| 48               | 1972 | Wang Zhengcai                     | poor peasant         | 7              |                   |       |                               | 8023                   | 2009                        | 10032              |                             | 10032                      |                              | 10032                       | 2275                        | 662                             |                                      | 2937                  | 419.58743                 | 2937.112                       | 401.28              |                         | 328.96                     | 58.74224    | 1.87                   |                           | 389.56878                             | 11.71                       |                                    | 2                    | 3                                       | 2                                         | Zhang Lianrong            | 2                                       |                      |                  |                |                |
| 49               | 1972 | Wang Zhengxuan                    | poor peasant         | 5              |                   |       |                               | 5119                   | 1223                        | 6342               |                             | 6342                       |                              | 6342                        | 1625                        | 419                             |                                      | 2044                  | 408.7144                  | 2043.572                       | 253.68              |                         | 228.88                     | 40.87144    | 1.59                   |                           | 271.3415                              | -17.66                      |                                    | 2                    | 3                                       | 2                                         | Zhang Lianrong            | 2                                       |                      |                  |                |                |
| 50               | 1972 | Chao Jingzhi                      | poor peasant         | 3              |                   |       |                               | 3974                   | 557                         | 4531               |                             | 4531                       |                              | 4531                        | 975                         | 299                             |                                      | 1274                  | 424.682                   | 1274.046                       | 181.24              |                         | 142.69                     | 25.48092    | 0.94                   |                           | 169.11407                             | 12.13                       |                                    | 2                    | 3                                       | 2                                         | Zhang Lianrong            | 2                                       |                      |                  |                |                |
| 51               | 1972 | Chao Shengyu                      | poor peasant         | 3              |                   |       |                               | 3859                   | 424                         | 4283               |                             | 4283                       |                              | 4283                        | 975                         | 283                             |                                      | 1258                  | 419.226                   | 1257.678                       | 171.32              |                         | 140.86                     | 25.15356    | 0.87                   |                           | 166.8835                              | 4.44                        |                                    | 1                    | 3                                       | 2                                         | Zhang Lianrong            | 2                                       |                      |                  |                |                |
| 52               | 1972 | Wang Zhengyan                     | poor peasant         | 2              |                   |       |                               | 3797                   | 361                         | 4158               |                             | 4158                       |                              | 4158                        | 650                         | 274                             |                                      | 924                   | 462.214                   | 924.428                        | 166.32              |                         | 103.54                     | 18.48856    | 0.67                   |                           | 122.6945                              | 43.63                       |                                    | 1                    | 3                                       | 2                                         | Zhang Lianrong            | 2                                       |                      |                  |                |                |
| 53               | 1972 | Wang Zhengkuan                    | poor peasant         | 9              |                   |       |                               | 6990                   | 1067                        | 8057               |                             | 8057                       |                              | 8057                        | 2925                        | 532                             |                                      | 3457                  | 384.08467                 | 3456.762                       | 322.28              |                         | 387.16                     | 69.13524    | 1.77                   |                           | 458.06258                             | -135.78                     |                                    | 1                    | 3                                       | 2                                         | Zhang Lianrong            | 2                                       |                      |                  |                |                |
| 54               | 1972 | Wang Zhenggui                     | poor peasant         | 6              |                   |       |                               | 6508                   | 1028                        | 7536               |                             | 7536                       |                              | 7536                        | 1950                        | 497                             |                                      | 2447                  | 407.896                   | 2447.376                       | 301.44              |                         | 274.11                     | 48.94752    | 1.45                   |                           | 324.50363                             | -23.06                      |                                    | 2                    | 3                                       | 2                                         | Zhang Lianrong            | 2                                       |                      |                  |                |                |
| 55               | 1972 | Wang Tingxiang                    | poor peasant         | 2              |                   |       |                               | 1833                   | 411                         | 2244               |                             | 2244                       |                              | 2244                        | 650                         | 148                             |                                      | 798                   | 399.052                   | 798.104                        | 89.76               |                         | 89.39                      | 15.96208    | 0.31                   |                           | 105.65973                             | -15.90                      |                                    | 1                    | 3                                       | 2                                         | Zhang Lianrong            | 2                                       |                      |                  |                |                |
| 56               | 1972 | Wang Dshan                        | poor peasant         | 5              | educated youth    |       |                               | 2177                   | 1144                        | 3321               |                             | 3321                       |                              | 3321                        | 1625                        | 219                             |                                      | 1844                  | 368.8372                  | 1844.186                       | 132.84              |                         | 206.55                     | 36.88372    | 0.9                    |                           | 244.33255                             | -111.49                     |                                    | 1                    | 3                                       | 2                                         | Zhang Lianrong            | 2                                       |                      |                  |                |                |
| 57               | 1972 | Wang Deling                       | poor peasant         | 5              |                   |       |                               | 3212                   | 1153                        | 4365               |                             | 4365                       |                              | 4365                        | 1625                        | 288                             |                                      | 1913                  | 382.618                   | 1913.09                        | 174.6               |                         | 214.27                     | 38.2618     | 1.11                   |                           | 253.63788                             | -79.04                      |                                    | 1                    | 3                                       | 2                                         | Zhang Lianrong            | 2                                       |                      |                  |                |                |
| 58               | 1972 | Wang Deli                         | poor peasant         | 2.1            |                   |       |                               | 3892                   | 1016                        | 4908               |                             | 4908                       |                              | 4908                        | 682.5                       | 324                             |                                      | 1006                  | 479.25143                 | 1006.428                       | 196.32              |                         | 112.72                     | 20.12856    | 0.9                    |                           | 133.7485                              | 62.57                       |                                    | 1                    | 3                                       | 2                                         | Zhang Lianrong            | 2                                       |                      |                  |                |                |
| 59               | 1972 | Wang Dexiu                        | poor peasant         | 1.23           |                   |       |                               | 3032                   | 798                         | 3830               |                             | 3830                       |                              | 3830                        | 399.75                      | 253                             |                                      | 653                   | 530.5122                  | 652.53                         | 153.2               |                         | 73.08                      | 13.0506     | 0.56                   |                           | 86.69396                              | 66.51                       |                                    | 1                    | 3                                       | 2                                         | Zhang Lianrong            | 2                                       |                      |                  |                |                |
| 60               | 1972 | Feng Zhaoyuan                     | poor peasant         | 1              |                   |       |                               | 1455                   | 0                           | 1455               |                             | 1455                       |                              | 1455                        | 325                         | 96                              |                                      | 421                   | 421.03                    | 421.03                         | 58.2                |                         | 47.16                      | 8.4206      | 0.26                   |                           | 55.83596                              | 2.36                        |                                    | 2                    | 3                                       | 2                                         | Zhang Lianrong            | 2                                       |                      |                  |                |                |
| 61               | 1972 | Ge Zhengxian                      | poor peasant         | 1              |                   |       |                               | 1732                   | 0                           | 1732               |                             | 1732                       |                              | 1732                        | 325                         | 114                             |                                      | 439                   | 439.312                   | 439.312                        | 69.28               |                         | 49.20                      | 8.78624     | 0.3                    |                           | 58.289184                             | 10.99                       |                                    | 3                    | 3                                       | 2                                         | Zhang Lianrong            | 2                                       |                      |                  |                |                |
| 62               | 1972 | Niu Aiqin                         | educated youth       | 1              |                   |       |                               | 1993                   | 131                         | 2124               |                             | 2124                       |                              | 2124                        | 325                         | 140                             |                                      | 465                   | 465.184                   | 465.184                        | 84.96               |                         | 52.10                      | 9.30368     | 0.27                   |                           | 61.674288                             | 23.29                       |                                    | 1                    | 4                                       | 2                                         | Zhang Lianrong            | 2                                       |                      |                  |                |                |
| 63               | 1972 | Wu Jihua                          | educated youth       | 1              |                   |       |                               | 1885                   | 131                         | 2016               |                             | 2016                       |                              | 2016                        | 325                         | 133                             |                                      | 458                   | 458.056                   | 458.056                        | 80.64               |                         | 51.30                      | 9.16112     | 0.27                   |                           | 60.733392                             | 19.91                       |                                    | 1                    | 4                                       | 2                                         | Zhang Lianrong            | 2                                       |                      |                  |                |                |
| 64               | 1972 | Ge Dongping                       | educated youth       | 2              |                   |       |                               | 3810                   | 262                         | 4072               |                             | 4072                       |                              | 4072                        | 650                         | 269                             |                                      | 919                   | 459.376                   | 918.752                        | 162.88              |                         | 102.90                     | 18.37504    | 0.51                   |                           | 121.78526                             | 41.09                       |                                    | 1                    | 4                                       | 2                                         | Zhang Lianrong            | 2                                       |                      |                  |                |                |
| 66               | 1972 | Chen Qiansheng                    | poor peasant         | 1              | peasant           |       |                               | 3046                   | 0                           | 3046               |                             | 3046                       |                              | 3046                        | 325                         | 201                             |                                      | 526                   | 526.036                   | 526.036                        | 121.84              |                         | 58.92                      | 10.52072    | 0.5                    |                           | 69.936752                             | 51.90                       |                                    | 1                    | 3                                       | 2                                         | Zhang Lianrong            | 2                                       |                      |                  |                |                |
| 67               | 1972 | Zhang Lianrong                    | poor peasant         | 1              |                   |       |                               | 2997                   | 0                           | 2997               | 300                         | 3297                       |                              | 3297                        | 325                         | 218                             |                                      | 543                   | 542.602                   | 542.602                        | 131.88              |                         | 60.77                      | 10.85204    | 0.5                    |                           | 72.123464                             | 59.76                       |                                    | 1                    | 3                                       | 2                                         | Zhang Lianrong            | 2                                       |                      |                  |                |                |
| 68               | 1972 | Ma Lianjun                        | middle-class peasant | 9              |                   |       |                               | 4664                   | 1796                        | 6460               |                             | 6460                       |                              | 6460                        | 2925                        | 426                             |                                      | 3351                  | 372.37333                 | 3351.36                        | 258.4               |                         | 375.35                     | 67.0272     | 1.56                   |                           | 443.93952                             | -185.54                     |                                    | 2                    | 2                                       | 2                                         | Zhang Lianrong            | 2                                       |                      |                  |                |                |
| 69               | 1972 | Feng Xiaolou                      | landlord             | 1              |                   |       |                               | 1671                   | 0                           | 1671               |                             | 1671                       |                              | 1671                        | 325                         | 110                             |                                      | 435                   | 435.286                   | 435.286                        | 66.84               |                         | 48.75                      | 8.70572     | 0.27                   |                           | 57.727752                             | 9.11                        |                                    | 3                    | 1                                       | 2                                         | Zhang Lianrong            | 2                                       |                      |                  |                |                |
| 1                | 1973 | Ma Zhenqi                         | middle-class peasant | 2              |                   |       | 624                           | 80                     | 704                         |                    | 704                         |                            | 704                          | 646                         | 45                          |                                 | 691                                  | 345.50688             | 691.01376                 | 25.342592                      |                     | 2.8                     | 28.142592                  | 69.101376   | 10.363133              | 0.66                      |                                       | 80.124509                   | -51.98                             |                      | 3                                       | 2                                         | 2                         | Zhang Lianrong                          | 2                    |                  |                |                |
| 2                | 1973 | Wang Xinming                      | middle-class peasant | 8              |                   |       | 2823                          | 1143                   | 3966                        |                    | 3966                        | 3400                       | 7366                         | 2584                        | 471                         |                                 | 3055                                 | 381.87276             | 3054.982                  | 142.768068                     |                     | 11.2                    | 153.968068                 | 305.4982    | 45.815566              | 4.16                      |                                       | 355.47377                   | -201.51                            |                      | 1                                       | 2                                         | 2                         | Zhang Lianrong                          | 2                    |                  |                |                |



(cont.)

| Household number | Year | Name of the head of the household | Family class status  | Family members | Family characters                        | Labor | Number of standard population | Work points settlement |                             |                    |                             | Grain distribution         |                              |                             |                             |                                 | Firewood distribution | Work points income (Yuan)            |                         |                                |                     | Deducted amount (Yuan)  |                            |             |                        |                           | Distribution results (Yuan) | Distribution results (Yuan)           |                                    |                      |                                         | Guanxi                                    |                           |                                         |                      |                  |                |                |
|------------------|------|-----------------------------------|----------------------|----------------|------------------------------------------|-------|-------------------------------|------------------------|-----------------------------|--------------------|-----------------------------|----------------------------|------------------------------|-----------------------------|-----------------------------|---------------------------------|-----------------------|--------------------------------------|-------------------------|--------------------------------|---------------------|-------------------------|----------------------------|-------------|------------------------|---------------------------|-----------------------------|---------------------------------------|------------------------------------|----------------------|-----------------------------------------|-------------------------------------------|---------------------------|-----------------------------------------|----------------------|------------------|----------------|----------------|
|                  |      |                                   |                      |                |                                          |       |                               | Laboring work points   | Farmyard manure work points | Sum of work points | subsidy work points by cash | Sum of work points by cash | Subsidy work points by grain | Sum of work points by grain | Grain distribution: rations | Grain distribution: work points |                       | Grain distribution: subsidized grain | Grain distribution: sum | Grain distribution: per capita | Income: work points | Income: welfare subsidy | Income: prepaied overdraft | Income: sum | Deducted amount: grain | Deducted amount: firewood |                             | Deducted amount: other things in kind | Deducted amount: withdraw advances | Deducted amount: sum | Distribution results: personal solution | Distribution results: collective solution | Distribution results: sum | Interpersonal relationship with leaders | Family class status2 | Number of leader | Name of leader | Term of office |
|                  |      |                                   |                      |                |                                          |       |                               |                        |                             |                    |                             |                            |                              |                             |                             |                                 |                       |                                      |                         |                                |                     |                         |                            |             |                        |                           |                             |                                       |                                    |                      |                                         |                                           |                           |                                         |                      |                  |                |                |
| 3                | 1973 | Feng Kaiying                      | poor peasant         | 5              | worker families of revolutionary martyrs |       |                               | 3509                   | 340                         | 3849               |                             | 3849                       |                              | 3849                        | 1615                        | 246                             |                       | 1861                                 | 372.22101               | 1861.1051                      | 138.556302          | 7                       | 145.556302                 | 186.11051   | 27.910993              | 2.44                      |                             | 216.4615                              | -70.91                             |                      | 3                                       | 3                                         | 2                         | Zhang Lianrong                          | 2                    |                  |                |                |
| 4                | 1973 | Wang Tinglan                      | poor peasant         | 2.12           |                                          |       | 3904                          | 234                    | 4138                        |                    | 4138                        |                            | 4138                         | 684.76                      | 265                         |                                 | 949                   | 447.80364                            | 949.34372               | 148.959724                     | 2.8                 | 151.759724              | 94.934372                  | 14.237308   | 1.88                   |                           | 111.05168                   | 40.71                                 |                                    | 3                    | 3                                       | 2                                         | Zhang Lianrong            | 2                                       |                      |                  |                |                |
| 5                | 1973 | Wang Zuoliang                     | poor peasant         | 4.67           |                                          |       | 3847                          | 326                    | 4173                        |                    | 4173                        |                            | 4173                         | 1508.41                     | 267                         |                                 | 1775                  | 380.13525                            | 1775.2316               | 150.219654                     | 5.6                 | 155.819654              | 177.52316                  | 26.623149   | 2.48                   |                           | 206.62631                   | -50.81                                |                                    | 3                    | 3                                       | 2                                         | Zhang Lianrong            | 2                                       |                      |                  |                |                |
| 6                | 1973 | Wang Tingmei                      | poor peasant         | 6              |                                          |       | 6587                          | 483                    | 7070                        |                    | 7070                        |                            | 7070                         | 1938                        | 452                         |                                 | 2390                  | 398.34263                            | 2390.0558               | 254.50586                      | 8.4                 | 262.90586               | 239.00558                  | 35.843667   | 3.68                   |                           | 278.52925                   | -15.62                                |                                    | 3                    | 3                                       | 2                                         | Zhang Lianrong            | 2                                       |                      |                  |                |                |
| 7                | 1973 | Wang Tingxi                       | poor peasant         | 3              |                                          |       | 1291                          | 244                    | 1535                        |                    | 1535                        | 2300                       | 3835                         | 969                         | 245                         |                                 | 1214                  | 404.73663                            | 1214.2099               | 55.25693                       | 4.2                 | 59.45693                | 121.42099                  | 18.209506   | 1.6                    |                           | 141.2305                    | -81.77                                |                                    | 2                    | 3                                       | 2                                         | Zhang Lianrong            | 2                                       |                      |                  |                |                |
| 8                | 1973 | Tingxi's Mother                   | poor peasant         | 1              |                                          |       | 0                             | 0                      | 0                           | 1450               | 1450                        |                            | 1450                         | 323                         | 93                          |                                 | 416                   | 415.713                              | 415.713                 | 52.1971                        | 1.4                 | 53.5971                 | 41.5713                    | 6.2344479   | 0.64                   |                           | 48.445748                   | 5.15                                  |                                    | 2                    | 3                                       | 2                                         | Zhang Lianrong            | 2                                       |                      |                  |                |                |
| 9                | 1973 | Wang Tingzhi                      | poor peasant         | 2              |                                          |       |                               |                        | 2388                        | 410                | 2798                        |                            | 2798                         |                             | 2798                        | 646                             | 179                   |                                      | 825                     | 412.45206                      | 824.90412           | 100.722404              | 2.8                        | 103.522404  | 82.490412              | 12.371087                 | 1.4                         |                                       | 96.261499                          | 7.26                 |                                         | 3                                         | 3                         | 2                                       | Zhang Lianrong       | 2                |                |                |
| 10               | 1973 | Wang Zuoxing                      | poor peasant         | 4              |                                          |       |                               |                        | 2846                        | 116                | 2962                        |                            | 2962                         | 1292                        | 189                         |                                 | 1481                  | 370.34757                            | 1481.3903               | 106.626076                     | 1.1                 | 107.726076              | 148.13903                  | 22.21641    | 1.96                   |                           | 172.31544                   | -64.59                                |                                    | 3                    | 3                                       | 2                                         | Zhang Lianrong            | 2                                       |                      |                  |                |                |
| 11               | 1973 | Wang Zuoqi                        | poor peasant         | 4.56           |                                          |       |                               | 4989                   | 691                         | 5680               |                             | 5680                       | 1472.88                      | 363                         |                             | 1836                            | 402.64456             | 1836.0592                            | 204.46864               | 5.6                            | 210.06864           | 183.60592               | 27.53538                   | 2.8         |                        | 213.9413                  | -3.87                       |                                       | 3                                  | 3                    | 2                                       | Zhang Lianrong                            | 2                         |                                         |                      |                  |                |                |
| 12               | 1973 | Kaiying's mother                  | poor peasant         | 1              |                                          |       |                               | 876                    | 717                         | 1593               |                             | 1593                       | 323                          | 102                         |                             | 425                             | 424.85642             | 424.85642                            | 57.344814               | 1.4                            | 58.744814           | 42.485642               | 6.3715717                  | 0.6         |                        | 49.457214                 | 9.29                        |                                       | 2                                  | 3                    | 2                                       | Zhang Lianrong                            | 2                         |                                         |                      |                  |                |                |
| 13               | 1973 | Zhaoxiang's mother                | landlord             | 1              |                                          |       |                               | 4                      | 82                          | 86                 |                             | 86                         | 323                          | 5                           |                             | 328                             | 328.49884             | 328.49884                            | 3.095828                | 1.4                            | 4.495828            | 32.849884               | 4.9264971                  | 0.24        |                        | 38.016381                 | -33.52                      |                                       | 3                                  | 1                    | 2                                       | Zhang Lianrong                            | 2                         |                                         |                      |                  |                |                |
| 14               | 1973 | Feng Kailing                      | landlord             | 2              |                                          |       |                               | 4187                   | 260                         | 4447               |                             | 4447                       |                              | 4447                        | 646                         | 284                             |                       | 930                                  | 465.17059               | 930.34118                      | 160.083106          | 2.8                     | 162.883106                 | 93.034118   | 13.952327              | 2.02                      |                             | 109.00644                             | 53.88                              |                      | 3                                       | 1                                         | 2                         | Zhang Lianrong                          | 2                    |                  |                |                |
| 15               | 1973 | Feng Zhaorui                      | landlord             | 6              |                                          |       |                               | 8632                   | 1122                        | 9754               |                             | 9754                       | 1938                         | 624                         |                             | 2562                            | 426.94513             | 2561.6708                            | 351.124492              | 8.4                            | 359.524492          | 256.16708               | 38.417376                  | 4.72        |                        | 299.30445                 | 60.22                       |                                       | 3                                  | 1                    | 2                                       | Zhang Lianrong                            | 2                         |                                         |                      |                  |                |                |
| 16               | 1973 | Wang Zuozhen                      | poor peasant         | 3              |                                          |       |                               | 3294                   | 147                         | 3441               |                             | 3441                       | 969                          | 220                         |                             | 1189                            | 396.33918             | 1189.0175                            | 123.869118              | 4.2                            | 128.069118          | 118.90175               | 17.831696                  | 1.84        |                        | 138.57345                 | -10.50                      |                                       | 1                                  | 3                    | 2                                       | Zhang Lianrong                            | 2                         |                                         |                      |                  |                |                |
| 17               | 1973 | Chen Xuezhong                     | poor peasant         | 2              |                                          |       |                               | 3007                   | 292                         | 3299               |                             | 3299                       | 646                          | 211                         |                             | 857                             | 428.46903             | 856.93806                            | 118.757402              | 2.8                            | 121.557402          | 85.693806               | 12.8515                    | 1.58        |                        | 100.12531                 | 21.43                       |                                       | 1                                  | 3                    | 2                                       | Zhang Lianrong                            | 2                         |                                         |                      |                  |                |                |
| 18               | 1973 | Feng Baojin                       | poor peasant         | 3              |                                          |       |                               | 3275                   | 253                         | 3528               |                             | 3528                       | 969                          | 226                         |                             | 1195                            | 398.19344             | 1194.5803                            | 127.000944              | 2.4                            | 129.400944          | 119.45803               | 17.915121                  | 1.86        |                        | 139.23315                 | -9.83                       |                                       | 1                                  | 3                    | 2                                       | Zhang Lianrong                            | 2                         |                                         |                      |                  |                |                |
| 19               | 1973 | Feng Xianzhong                    | poor peasant         | 3              |                                          |       |                               | 2381                   | 320                         | 2701               |                             | 2701                       | 969                          | 173                         |                             | 1142                            | 380.56731             | 1141.7019                            | 97.230598               | 3.5                            | 100.730598          | 114.17019               | 17.122104                  | 1.4         |                        | 132.6923                  | -31.96                      |                                       | 3                                  | 3                    | 2                                       | Zhang Lianrong                            | 2                         |                                         |                      |                  |                |                |
| 20               | 1973 | Feng Kaiyuan                      | poor peasant         | 7              |                                          |       |                               | 4385                   | 766                         | 5151               |                             | 5151                       | 2261                         | 329                         |                             | 2590                            | 370.05071             | 2590.3549                            | 185.425698              | 9.8                            | 195.225698          | 259.03549               | 38.847553                  | 3.22        |                        | 301.10305                 | -105.88                     |                                       | 3                                  | 3                    | 2                                       | Zhang Lianrong                            | 2                         |                                         |                      |                  |                |                |
| 21               | 1973 | Feng Kaiwu                        | poor peasant         | 8              |                                          |       |                               | 9955                   | 1007                        | 10962              |                             | 10962                      | 2584                         | 701                         |                             | 3285                            | 410.61379             | 3284.9103                            | 394.610076              | 11.2                           | 405.810076          | 328.49103               | 49.263799                  | 5.48        |                        | 383.23483                 | 22.58                       |                                       | 2                                  | 3                    | 2                                       | Zhang Lianrong                            | 2                         |                                         |                      |                  |                |                |
| 22               | 1973 | Feng Kaiwen                       | poor peasant         | 8              |                                          |       |                               | 8755                   | 624                         | 9379               |                             | 9379                       | 2584                         | 600                         |                             | 3184                            | 397.96166             | 3183.6933                            | 337.625242              | 7                              | 344.625242          | 318.36933               | 47.745848                  | 4.9         |                        | 371.01517                 | -26.39                      |                                       | 3                                  | 3                    | 2                                       | Zhang Lianrong                            | 2                         |                                         |                      |                  |                |                |
| 23               | 1973 | Kou Huaisheng                     | poor peasant         | 7              |                                          |       |                               | 6700                   | 833                         | 7533               |                             | 7533                       | 2261                         | 482                         |                             | 2743                            | 391.80857             | 2742.66                              | 271.172934              | 9.8                            | 280.972934          | 274.266                 | 41.131672                  | 4.1         |                        | 319.49767                 | -38.52                      |                                       | 1                                  | 3                    | 2                                       | Zhang Lianrong                            | 2                         |                                         |                      |                  |                |                |
| 24               | 1973 | Anming's mother                   | landlord             | 1              |                                          |       |                               | 848                    | 138                         | 986                |                             | 986                        | 323                          | 63                          |                             | 386                             | 386.04484             | 386.04484                            | 35.494028               | 1.4                            | 36.894028           | 38.604484               | 5.7895145                  | 0.58        |                        | 44.973998                 | -8.08                       |                                       | 3                                  | 1                    | 2                                       | Zhang Lianrong                            | 2                         |                                         |                      |                  |                |                |
| 25               | 1973 | Wang Xiujuan                      | poor peasant         | 4              |                                          |       |                               | 5196                   | 359                         | 5555               |                             | 5555                       | 1292                         | 355                         |                             | 1647                            | 411.79668             | 1647.1867                            | 199.96889               | 5.6                            | 205.56889           | 164.71867               | 24.702859                  | 2.8         |                        | 192.22153                 | 13.35                       |                                       | 3                                  | 3                    | 2                                       | Zhang Lianrong                            | 2                         |                                         |                      |                  |                |                |
| 26               | 1973 | Feng Zhaobu                       | middle-class peasant | 4              |                                          |       |                               | 146                    | 153                         | 299                | 2100                        | 2399                       | 2100                         | 4499                        | 1292                        | 288                             |                       | 1580                                 | 394.91652               | 1579.6661                      | 86.359202           | 0                       | 86.359202                  | 157.96661   | 23.690252              | 2.06                      |                             | 183.71686                             | -97.36                             |                      | 1                                       | 2                                         | 2                         | Zhang Lianrong                          | 2                    |                  |                |                |
| 27               | 1973 | Feng Zhaohuan                     | middle-class peasant | 5.93           |                                          |       |                               | 2682                   | 308                         | 2990               |                             | 2990                       |                              | 2990                        | 1915.39                     | 191                             |                       | 2107                                 | 355.23956               | 2106.5706                      | 107.63402           | 8.4                     | 116.03402                  | 210.65706   | 31.592239              | 2.36                      |                             | 244.6093                              | -128.58                            |                      | 3                                       | 2                                         | 2                         | Zhang Lianrong                          | 2                    |                  |                |                |
| 28               | 1973 | Zhaohuan's mother                 | middle-class peasant | 1              |                                          |       |                               | 1400                   | 0                           | 1400               |                             | 1400                       |                              | 1400                        | 323                         | 90                              |                       | 413                                  | 412.516                 | 412.516                        | 50.3972             | 1.4                     | 51.7972                    | 41.2516     | 6.1865025              | 0.52                      |                             | 47.958102                             | 3.84                               |                      | 3                                       | 2                                         | 2                         | Zhang Lianrong                          | 2                    |                  |                |                |

(cont.)

| Household number | Year | Name of the head of the household | Family class status  | Family members | Family characters | Labor | Number of standard population | Work points settlement |                             |                    |                             |                            | Grain distribution           |                             |                             |                                 |                                      | Firewood distribution | Work points income (Yuan) |                                |                     |                         | Deducted amount (Yuan)     |             |                        |                           |                                       | Distribution results (Yuan) | Distribution results (Yuan)        |                      |                                         | Guanxi                                    |                           |                                         |                                  |                  |                |                |
|------------------|------|-----------------------------------|----------------------|----------------|-------------------|-------|-------------------------------|------------------------|-----------------------------|--------------------|-----------------------------|----------------------------|------------------------------|-----------------------------|-----------------------------|---------------------------------|--------------------------------------|-----------------------|---------------------------|--------------------------------|---------------------|-------------------------|----------------------------|-------------|------------------------|---------------------------|---------------------------------------|-----------------------------|------------------------------------|----------------------|-----------------------------------------|-------------------------------------------|---------------------------|-----------------------------------------|----------------------------------|------------------|----------------|----------------|
|                  |      |                                   |                      |                |                   |       |                               | Laboring work points   | Farmyard manure work points | Sum of work points | subsidy work points by cash | Sum of work points by cash | Subsidy work points by grain | Sum of work points by grain | Grain distribution: rations | Grain distribution: work points | Grain distribution: subsidized grain |                       | Grain distribution: sum   | Grain distribution: per capita | Income: work points | Income: welfare subsidy | Income: prepaied overdraft | Income: sum | Deducted amount: grain | Deducted amount: firewood | Deducted amount: other things in kind |                             | Deducted amount: withdraw advances | Deducted amount: sum | Distribution results: personal solution | Distribution results: collective solution | Distribution results: sum | Interpersonal relationship with leaders | Family class status <sup>2</sup> | Number of leader | Name of leader | Term of office |
|                  |      |                                   |                      |                |                   |       |                               |                        |                             |                    |                             |                            |                              |                             |                             |                                 |                                      |                       |                           |                                |                     |                         |                            |             |                        |                           |                                       |                             |                                    |                      |                                         |                                           |                           |                                         |                                  |                  |                |                |
| 29               | 1973 | Feng Kaijun                       | poor peasant         | 10             |                   |       | 10500                         | 997                    | 11497                       |                    | 11497                       | 11497                      | 3230                         | 735                         |                             | 3965                            | 396.51182                            | 3965.1182             | 413.869006                | 14                             | 427.869006          | 396.51182               | 59.464877                  | 6.06        |                        | 462.0367                  | -34.17                                |                             | 3                                  | 3                    | 2                                       | Zhang Lianrong                            | 2                         |                                         |                                  |                  |                |                |
| 30               | 1973 | Feng Kaizheng                     | poor peasant         | 9              |                   |       | 8831                          | 686                    | 9517                        | 1800               | 11317                       | 11317                      | 2907                         | 724                         |                             | 3631                            | 403.401                              | 3630.609              | 407.389366                | 12.6                           | 419.989366          | 363.0609                | 54.448243                  | 5.58        |                        | 423.08914                 | -3.10                                 |                             | 2                                  | 3                    | 2                                       | Zhang Lianrong                            | 2                         |                                         |                                  |                  |                |                |
| 31               | 1973 | Feng Zhaoxin                      | poor peasant         | 8.58           |                   |       | 8665                          | 770                    | 9435                        | 1420               | 10855                       | 10855                      | 2771.34                      | 694                         |                             | 3465                            | 403.89379                            | 3465.4087             | 390.75829                 | 11.2                           | 401.95829           | 346.54087               | 51.970734                  | 5.44        |                        | 403.9516                  | -1.99                                 |                             | 3                                  | 3                    | 2                                       | Zhang Lianrong                            | 2                         |                                         |                                  |                  |                |                |
| 32               | 1973 | Wang Xiangyun                     | middle-class peasant | 6              |                   |       | 5653                          | 1726                   | 7379                        |                    | 7379                        | 7379                       | 1938                         | 472                         |                             | 2410                            | 401.63554                            | 2409.8133             | 265.629242                | 3.3                            | 268.929242          | 240.98133               | 36.139969                  | 2.82        |                        | 279.9413                  | -11.01                                |                             | 3                                  | 2                    | 2                                       | Zhang Lianrong                            | 2                         |                                         |                                  |                  |                |                |
| 33               | 1973 | Wang Xuewen                       | middle-class peasant | 3              |                   |       | 5212                          | 432                    | 5644                        |                    | 5644                        | 5644                       | 969                          | 361                         |                             | 1330                            | 443.29245                            | 1329.8774             | 203.172712                | 4.2                            | 207.372712          | 132.98774               | 19.944171                  | 2.6         |                        | 155.53191                 | 51.84                                 |                             | 2                                  | 2                    | 2                                       | Zhang Lianrong                            | 2                         |                                         |                                  |                  |                |                |
| 35               | 1973 | Feng Xianhua                      | middle-class peasant | 2              |                   |       | 3097                          | 217                    | 3314                        |                    | 3314                        | 3314                       | 646                          | 212                         |                             | 858                             | 428.94858                            | 857.89716             | 119.297372                | 2.8                            | 122.097372          | 85.789716               | 12.865884                  | 1.46        |                        | 100.1156                  | 21.98                                 |                             | 1                                  | 2                    | 2                                       | Zhang Lianrong                            | 2                         |                                         |                                  |                  |                |                |
| 36               | 1973 | Feng Xiaoxi                       | middle-class peasant | 5              |                   |       | 5929                          | 426                    | 6355                        |                    | 6355                        | 6355                       | 1615                         | 406                         |                             | 2021                            | 404.26774                            | 2021.3387             | 228.76729                 | 7                              | 235.76729           | 202.13387               | 30.314016                  | 3.52        |                        | 235.96789                 | -0.20                                 |                             | 2                                  | 2                    | 2                                       | Zhang Lianrong                            | 2                         |                                         |                                  |                  |                |                |
| 37               | 1973 | Feng Xiangui                      | middle-class peasant | 7              |                   |       | 4122                          | 988                    | 5110                        |                    | 5110                        | 5110                       | 2261                         | 327                         |                             | 2588                            | 369.6762                             | 2587.7334             | 183.94978                 | 9.8                            | 193.74978           | 258.77334               | 38.808238                  | 3.44        |                        | 301.02158                 | -107.27                               |                             | 3                                  | 2                    | 2                                       | Zhang Lianrong                            | 2                         |                                         |                                  |                  |                |                |
| 38               | 1973 | Feng Xianzhen                     | middle-class peasant | 5              |                   |       | 7752                          | 746                    | 8498                        |                    | 8498                        | 8498                       | 1615                         | 543                         |                             | 2158                            | 431.67242                            | 2158.3621             | 305.911004                | 7                              | 312.911004          | 215.83621               | 32.368957                  | 4.24        |                        | 252.44517                 | 60.47                                 |                             | 2                                  | 2                    | 2                                       | Zhang Lianrong                            | 2                         |                                         |                                  |                  |                |                |
| 39               | 1973 | Feng Xianxue                      | middle-class peasant | 4              |                   |       | 4542                          | 370                    | 4912                        |                    | 4912                        | 4912                       | 1292                         | 314                         |                             | 1606                            | 401.51832                            | 1606.0733             | 176.822176                | 5.6                            | 182.422176          | 160.60733               | 24.086281                  | 2.54        |                        | 187.23361                 | -4.81                                 |                             | 1                                  | 2                    | 2                                       | Zhang Lianrong                            | 2                         |                                         |                                  |                  |                |                |
| 40               | 1973 | Wang Tingpin                      | poor peasant         | 2              |                   |       | 3940                          | 662                    | 4602                        |                    | 4602                        | 4602                       | 646                          | 294                         |                             | 940                             | 470.12594                            | 940.25188             | 165.662796                | 2.8                            | 168.462796          | 94.025188               | 14.100957                  | 2.02        |                        | 110.14615                 | 58.32                                 |                             | 1                                  | 3                    | 2                                       | Zhang Lianrong                            | 2                         |                                         |                                  |                  |                |                |
| 41               | 1973 | Wang Zhengfen                     | middle-class peasant | 3              |                   |       | 4905                          | 327                    | 5232                        |                    | 5232                        | 5232                       | 969                          | 335                         |                             | 1304                            | 434.51136                            | 1303.5341             | 188.341536                | 4.2                            | 192.541536          | 130.35341               | 19.549101                  | 2.5         |                        | 152.40251                 | 40.14                                 |                             | 1                                  | 2                    | 2                                       | Zhang Lianrong                            | 2                         |                                         |                                  |                  |                |                |
| 42               | 1973 | Wu Zongxiu                        | middle-class peasant | 2              |                   |       | 3694                          | 176                    | 3870                        |                    | 3870                        | 3870                       | 646                          | 247                         |                             | 893                             | 446.7239                             | 893.4478              | 139.31226                 | 2.8                            | 142.11226           | 89.34478                | 13.399037                  | 1.8         |                        | 104.54382                 | 37.57                                 |                             | 2                                  | 2                    | 2                                       | Zhang Lianrong                            | 2                         |                                         |                                  |                  |                |                |
| 43               | 1973 | Wang Depo                         | poor peasant         | 6              |                   |       | 4751                          | 377                    | 5128                        |                    | 5128                        | 5128                       | 1938                         | 328                         |                             | 2266                            | 377.64739                            | 2265.8843             | 184.597744                | 8.4                            | 192.997744          | 226.58843               | 33.981467                  | 3.02        |                        | 263.5899                  | -70.59                                |                             | 3                                  | 3                    | 2                                       | Zhang Lianrong                            | 2                         |                                         |                                  |                  |                |                |
| 44               | 1973 | Wang Dexue                        | poor peasant         | 2              |                   |       | 1856                          | 431                    | 2287                        |                    | 2287                        | 2287                       | 646                          | 146                         |                             | 792                             | 396.11539                            | 792.23078             | 82.327426                 | 2.8                            | 85.127426           | 79.223078               | 11.881085                  | 1.2         |                        | 92.304163                 | -7.18                                 |                             | 1                                  | 3                    | 2                                       | Zhang Lianrong                            | 2                         |                                         |                                  |                  |                |                |
| 45               | 1973 | Wang Dekuan                       | poor peasant         | 3              |                   |       | 3323                          | 0                      | 3323                        |                    | 3323                        | 3323                       | 969                          | 212                         |                             | 1181                            | 393.82421                            | 1181.4726             | 119.621354                | 4.2                            | 123.821354          | 118.14726               | 17.718545                  | 1.78        |                        | 137.64581                 | -13.82                                |                             | 1                                  | 3                    | 2                                       | Zhang Lianrong                            | 2                         |                                         |                                  |                  |                |                |
| 46               | 1973 | Wang Tingzhen                     | poor peasant         | 7              |                   |       | 1376                          | 320                    | 1696                        | 7300               | 8996                        | 8996                       | 2261                         | 575                         |                             | 2836                            | 405.17203                            | 2836.2042             | 323.838008                | 8                              | 331.838008          | 283.62042               | 42.534555                  | 3.6         |                        | 329.75498                 | 2.08                                  |                             | 1                                  | 3                    | 2                                       | Zhang Lianrong                            | 2                         |                                         |                                  |                  |                |                |
| 47               | 1973 | Wang Tingjian                     | poor peasant         | 7              |                   |       | 15209                         | 803                    | 16012                       |                    | 16012                       | 16012                      | 2261                         | 1024                        |                             | 3285                            | 469.25818                            | 3284.8073             | 576.399976                | 5                              | 581.399976          | 328.48073               | 49.262255                  | 7.06        |                        | 384.80298                 | 196.60                                |                             | 1                                  | 3                    | 2                                       | Zhang Lianrong                            | 2                         |                                         |                                  |                  |                |                |
| 48               | 1973 | Wang Zhengcai                     | poor peasant         | 7              |                   |       | 8485                          | 1041                   | 9526                        |                    | 9526                        | 9526                       | 2261                         | 609                         |                             | 2870                            | 410.01321                            | 2870.0924             | 342.916948                | 7                              | 349.916948          | 287.00924               | 43.042776                  | 4.78        |                        | 334.83202                 | 15.08                                 |                             | 1                                  | 3                    | 2                                       | Zhang Lianrong                            | 2                         |                                         |                                  |                  |                |                |
| 49               | 1973 | Wang Zhengxuan                    | poor peasant         | 5              |                   |       | 5945                          | 840                    | 6785                        |                    | 6785                        | 6785                       | 1615                         | 434                         |                             | 2049                            | 409.76658                            | 2048.8329             | 244.24643                 | 7                              | 251.24643           | 204.88329               | 30.726347                  | 3.4         |                        | 239.00964                 | 12.24                                 |                             | 2                                  | 3                    | 2                                       | Zhang Lianrong                            | 2                         |                                         |                                  |                  |                |                |
| 50               | 1973 | Chao Jingzhi                      | poor peasant         | 3              |                   |       | 5038                          | 399                    | 5437                        |                    | 5437                        | 5437                       | 969                          | 348                         |                             | 1317                            | 438.88059                            | 1316.6418             | 195.721126                | 4.2                            | 199.921126          | 131.66418               | 19.745677                  | 2.52        |                        | 153.92985                 | 45.99                                 |                             | 2                                  | 3                    | 2                                       | Zhang Lianrong                            | 2                         |                                         |                                  |                  |                |                |
| 51               | 1973 | Chao Shengyu                      | poor peasant         | 2.52           | worker            |       | 845                           | 93                     | 938                         |                    | 938                         | 1400                       | 2338                         | 813.96                      | 149                         |                                 | 963                                  | 382.32211             | 963.45172                 | 33.766124                      | 2.8                 | 36.566124               | 96.345172                  | 14.448885   | 0.98                   |                           | 111.77406                             | -75.21                      |                                    | 2                    | 3                                       | 2                                         | Zhang Lianrong            | 2                                       |                                  |                  |                |                |



(cont.)

| Household number | Year | Name of the head of the household | Family class status  | Family members | Family characters | Labor | Number of standard population | Work points settlement |                             |                    |                             | Grain distribution         |                              |                             |                             |                                 | Firewood distribution | Work points income (Yuan)            |                         |                                |                     | Deducted amount (Yuan)  |                            |             |                        |                           | Distribution results (Yuan) | Distribution results (Yuan)           |                                    |                      | Guanxi                                  |                                           |                           |                                         |                      |                  |                |                |
|------------------|------|-----------------------------------|----------------------|----------------|-------------------|-------|-------------------------------|------------------------|-----------------------------|--------------------|-----------------------------|----------------------------|------------------------------|-----------------------------|-----------------------------|---------------------------------|-----------------------|--------------------------------------|-------------------------|--------------------------------|---------------------|-------------------------|----------------------------|-------------|------------------------|---------------------------|-----------------------------|---------------------------------------|------------------------------------|----------------------|-----------------------------------------|-------------------------------------------|---------------------------|-----------------------------------------|----------------------|------------------|----------------|----------------|
|                  |      |                                   |                      |                |                   |       |                               | Laboring work points   | Farmyard manure work points | Sum of work points | subsidy work points by cash | Sum of work points by cash | Subsidy work points by grain | Sum of work points by grain | Grain distribution: rations | Grain distribution: work points |                       | Grain distribution: subsidized grain | Grain distribution: sum | Grain distribution: per capita | Income: work points | Income: welfare subsidy | Income: prepaied overdraft | Income: sum | Deducted amount: grain | Deducted amount: firewood |                             | Deducted amount: other things in kind | Deducted amount: withdraw advances | Deducted amount: sum | Distribution results: personal solution | Distribution results: collective solution | Distribution results: sum | Interpersonal relationship with leaders | Family class status2 | Number of leader | Name of leader | Term of office |
|                  |      |                                   |                      |                |                   |       |                               |                        |                             |                    |                             |                            |                              |                             |                             |                                 |                       |                                      |                         |                                |                     |                         |                            |             |                        |                           |                             |                                       |                                    |                      |                                         |                                           |                           |                                         |                      |                  |                |                |
| 52               | 1973 | Wang Zhengyan                     | poor peasant         | 2              |                   |       |                               | 4537                   | 312                         | 4849               |                             | 4849                       |                              | 4849                        | 646                         | 310                             |                       | 956                                  | 478.02253               | 956.04506                      | 174.554302          | 2.8                     | 177.354302                 | 95.604506   | 14.337808              | 2.16                      |                             | 112.10231                             | 65.25                              |                      | 1                                       | 3                                         | 2                         | Zhang Lianrong                          | 2                    |                  |                |                |
| 53               | 1973 | Wang Zhengkuan                    | poor peasant         | 9              |                   |       |                               | 10075                  | 872                         | 10947              |                             | 10947                      |                              | 10947                       | 2907                        | 700                             |                       | 3607                                 | 400.77235               | 3606.9512                      | 394.070106          | 12.6                    | 406.670106                 | 360.69512   | 54.093447              | 5.7                       |                             | 420.48856                             | -13.82                             |                      | 1                                       | 3                                         | 2                         | Zhang Lianrong                          | 2                    |                  |                |                |
| 54               | 1973 | Wang Zhenggui                     | poor peasant         | 6              |                   |       |                               | 7136                   | 1403                        | 8539               |                             | 8539                       |                              | 8539                        | 1938                        | 546                             |                       | 2484                                 | 413.99728               | 2483.9837                      | 307.386922          | 8.4                     | 315.786922                 | 248.39837   | 37.252303              | 4.24                      |                             | 289.89067                             | 25.90                              |                      | 1                                       | 3                                         | 2                         | Zhang Lianrong                          | 2                    |                  |                |                |
| 55               | 1973 | Wang Tingxiang                    | poor peasant         | 2              |                   |       |                               | 1882                   | 249                         | 2131               |                             | 2131                       |                              | 2131                        | 646                         | 136                             |                       | 782                                  | 391.12807               | 782.25614                      | 76.711738           | 2.8                     | 79.511738                  | 78.225614   | 11.731495              | 0.86                      |                             | 90.817109                             | -11.31                             |                      | 2                                       | 3                                         | 2                         | Zhang Lianrong                          | 2                    |                  |                |                |
| 56               | 1973 | Wang Deshan                       | poor peasant         | 5              |                   |       |                               | 2978                   | 982                         | 3960               |                             | 3960                       |                              | 3960                        | 1615                        | 253                             |                       | 1868                                 | 373.64048               | 1868.2024                      | 142.55208           | 5                       | 147.55208                  | 186.82024   | 28.017431              | 2.54                      |                             | 217.37767                             | -69.83                             |                      | 1                                       | 3                                         | 2                         | Zhang Lianrong                          | 2                    |                  |                |                |
| 57               | 1973 | Wang Deling                       | poor peasant         | 6              |                   |       |                               | 3112                   | 598                         | 3710               |                             | 3710                       |                              | 3710                        | 1938                        | 237                             |                       | 2175                                 | 362.53623               | 2175.2174                      | 133.55258           | 8.4                     | 141.95258                  | 217.52174   | 32.621735              | 2.66                      |                             | 252.80348                             | -110.85                            |                      | 1                                       | 3                                         | 2                         | Zhang Lianrong                          | 2                    |                  |                |                |
| 59               | 1973 | Wang Dexiu                        | poor peasant         | 1              |                   |       |                               | 850                    | 0                           | 850                |                             | 850                        |                              | 850                         | 0                           | 54                              |                       | 54                                   | 54.349                  | 54.349                         | 30.5983             | 0                       | 30.5983                    | 5.4349      | 0                      | 0                         |                             | 5.4349                                | 25.16                              |                      | 1                                       | 3                                         | 2                         | Zhang Lianrong                          | 2                    |                  |                |                |
| 60               | 1973 | Feng Zhaoyuan                     | poor peasant         | 1              |                   |       |                               | 1548                   | 0                           | 1548               |                             | 1548                       |                              | 1548                        | 323                         | 99                              |                       | 422                                  | 421.97912               | 421.97912                      | 55.724904           | 1.4                     | 57.124904                  | 42.197912   | 6.3284209              | 0.76                      |                             | 49.286333                             | 7.84                               |                      | 1                                       | 3                                         | 2                         | Zhang Lianrong                          | 2                    |                  |                |                |
| 61               | 1973 | Ge Zhengxian                      | poor peasant         | 1              |                   |       |                               | 1786                   | 0                           | 1786               |                             | 1786                       |                              | 1786                        | 323                         | 114                             |                       | 437                                  | 437.19684               | 437.19684                      | 64.292428           | 1.4                     | 65.692428                  | 43.719684   | 6.556641               | 0.82                      |                             | 51.096325                             | 14.60                              |                      | 1                                       | 3                                         | 2                         | Zhang Lianrong                          | 2                    |                  |                |                |
| 62               | 1973 | Niu Aiqin                         | educated youth       | 1              | educated youth    |       |                               | 2345                   | 110                         | 2455               |                             | 2455                       |                              | 2455                        | 323                         | 157                             |                       | 480                                  | 479.9727                | 479.9727                       | 88.37509            | 0                       | 88.37509                   | 47.99727    | 7.1981506              | 1.08                      |                             | 56.275421                             | 32.10                              |                      | 2                                       | 4                                         | 2                         | Zhang Lianrong                          | 2                    |                  |                |                |
| 63               | 1973 | Wu Jihua                          | educated youth       | 1              | educated youth    |       |                               | 2284                   | 110                         | 2394               |                             | 2394                       |                              | 2394                        | 323                         | 153                             |                       | 476                                  | 476.07236               | 476.07236                      | 86.179212           | 0                       | 86.179212                  | 47.607236   | 7.1396572              | 1.06                      |                             | 55.806893                             | 30.37                              |                      | 3                                       | 4                                         | 2                         | Zhang Lianrong                          | 2                    |                  |                |                |
| 64               | 1973 | Ge Dongping                       | educated youth       | 1              | educated youth    |       |                               | 551                    | 60                          | 611                |                             | 611                        | 700                          | 1311                        | 323                         | 84                              |                       | 407                                  | 406.82534               | 406.82534                      | 21.994778           | 0                       | 21.994778                  | 40.682534   | 6.1011596              | 1.38                      |                             | 48.163694                             | -26.17                             |                      | 1                                       | 4                                         | 2                         | Zhang Lianrong                          | 2                    |                  |                |                |
| 65               | 1973 | Ge Huihui                         | educated youth       | 1              | educated youth    |       |                               | 1639                   | 110                         | 1749               |                             | 1749                       |                              | 1749                        | 323                         | 112                             |                       | 435                                  | 434.83106               | 434.83106                      | 62.960502           | 0                       | 62.960502                  | 43.483106   | 6.5211614              | 0                         |                             | 50.004267                             | 12.96                              |                      | 1                                       | 4                                         | 2                         | Zhang Lianrong                          | 2                    |                  |                |                |
| 66               | 1973 | Chen Qiansheng                    | poor peasant         | 1              |                   |       |                               | 800                    | 0                           | 800                |                             | 800                        |                              | 800                         | 0                           | 51                              |                       | 51                                   | 51.152                  | 51.152                         | 28.7984             | 0                       | 28.7984                    | 5.1152      | 0                      | 0                         |                             | 5.1152                                | 23.68                              |                      | 1                                       | 3                                         | 2                         | Zhang Lianrong                          | 2                    |                  |                |                |
| 67               | 1973 | Zhang Lianrong                    | poor peasant         | 1              |                   |       |                               | 800                    | 0                           | 800                |                             | 800                        |                              | 800                         | 0                           | 51                              |                       | 51                                   | 51.152                  | 51.152                         | 28.7984             | 0                       | 28.7984                    | 5.1152      | 0                      | 0                         |                             | 5.1152                                | 23.68                              |                      | 1                                       | 3                                         | 2                         | Zhang Lianrong                          | 2                    |                  |                |                |
| 68               | 1973 | Ma Lianjun                        | middle-class peasant | 9              |                   |       |                               | 6878                   | 1435                        | 8313               |                             | 8313                       |                              | 8313                        | 2907                        | 532                             |                       | 3439                                 | 382.05925               | 3438.5332                      | 299.251374          | 12.6                    | 311.851374                 | 343.85332   | 51.567683              | 4.76                      |                             | 400.181                               | -88.33                             |                      | 1                                       | 2                                         | 2                         | Zhang Lianrong                          | 2                    |                  |                |                |
| 69               | 1973 | Feng Xiaolou                      | landlord             | 1              |                   |       |                               | 1685                   | 727                         | 2412               |                             | 2412                       |                              | 2412                        | 323                         | 154                             |                       | 477                                  | 477.22328               | 477.22328                      | 86.827176           | 1.4                     | 88.227176                  | 47.722328   | 7.1569175              | 1.06                      |                             | 55.939246                             | 32.29                              |                      | 2                                       | 1                                         | 2                         | Zhang Lianrong                          | 2                    |                  |                |                |
| 72               | 1973 | Chen Juwu                         | poor peasant         | 1              |                   |       |                               | 900                    | 0                           | 900                |                             | 900                        |                              | 900                         | 0                           | 58                              |                       | 58                                   | 57.546                  | 57.546                         | 32.3982             | 0                       | 32.3982                    | 5.7546      | 0                      | 0                         |                             | 5.7546                                | 26.64                              |                      | 3                                       | 3                                         | 2                         | Zhang Lianrong                          | 2                    |                  |                |                |
| 34s              | 1973 | Feng Xianming                     | landlord             | 4              |                   |       |                               | 6269                   | 592                         | 6861               |                             | 6861                       |                              | 6861                        | 1292                        | 439                             |                       | 1731                                 | 432.67309               | 1730.6923                      | 246.982278          | 5.6                     | 252.582278                 | 173.06923   | 25.955193              | 2.54                      |                             | 201.56443                             | 51.02                              |                      | 2                                       | 1                                         | 2                         | Zhang Lianrong                          | 2                    |                  |                |                |
| 1                | 1974 | Ma Zhenqi                         | middle-class peasant | 2              |                   |       |                               | 1115                   | 60                          | 1175               |                             | 1175                       |                              | 1175                        | 520                         | 61.04125                        |                       | 581.04125                            | 290.52063               | 379                            | 35.25               | 4                       | 39.25                      | 63.88       | 2                      |                           | 65.88                       | -26.63                                |                                    |                      | 10.63                                   | -16.00                                    | 3                         | 2                                       | 3                    | Wang Zhengcai    | 1              |                |
| 2                | 1974 | Wang Xinming                      | middle-class peasant | 7              |                   |       |                               | 5275                   | 1116                        | 6391               |                             | 6391                       | 2900                         | 9291                        | 1820                        | 482.66745                       |                       | 2302.6675                            | 328.95249               | 1401                           | 191.73              | 20                      | 211.73                     | 251.31      |                        | 8.04                      |                             | 259.35                                | -47.62                             |                      |                                         | -47.62                                    | 2                         | 2                                       | 3                    | Wang Zhengcai    | 1              |                |
| 3                | 1974 | Feng Kaiying                      | poor peasant         | 5              |                   |       |                               | 5191                   | 834                         | 6025               |                             | 6025                       |                              | 6025                        | 1300                        | 312.99875                       |                       | 1612.9988                            | 322.59975               | 995                            | 180.75              | 0                       | 180.75                     | 176.23      |                        | 5.54                      |                             | 181.77                                | -1.02                              |                      |                                         | -1.02                                     | 3                         | 3                                       | 3                    | Wang Zhengcai    | 1              |                |
| 4                | 1974 | Wang Zuopeng                      | poor peasant         | 2              |                   |       |                               | 3445                   | 284                         | 3729               |                             | 3729                       |                              | 3729                        | 520                         | 193.72155                       |                       | 713.72155                            | 356.86078               | 421                            | 111.87              | 0                       | 111.87                     | 77.22       |                        | 2.5                       | 5.54                        | 85.26                                 | 26.61                              |                      | 3                                       |                                           | 23.61                     | 3                                       | 3                    | 3                | Wang Zhengcai  | 1              |
| 5                | 1974 | Wang Zuoliang                     | poor peasant         | 5              |                   |       |                               | 3986                   | 379                         | 4365               |                             | 4365                       |                              | 4365                        | 1300                        | 226.76175                       |                       | 1526.7618                            | 305.35235               | 975                            | 130.95              | 10                      | 140.95                     | 167.33      |                        | 5.28                      |                             | 172.61                                | -31.66                             |                      |                                         | 6.66                                      | -25.00                    | 3                                       | 3                    | 3                | Wang Zhengcai  | 1              |

(cont.)

| Household number | Year | Name of the head of the household | Family class status  | Family members | Family characters                        | Labor | Number of standard population | Work points settlement |                             |                    |                             |                            | Grain distribution           |                             |                             |                                 |                                      | Firewood distribution | Work points income (Yuan) |                                |                     |                         | Deducted amount (Yuan)     |             |                        |                           |                                       | Distribution results (Yuan) | Distribution results (Yuan)        |                      |                                         |                                           | Guanxi                    |                                         |                      |                  |                |                |
|------------------|------|-----------------------------------|----------------------|----------------|------------------------------------------|-------|-------------------------------|------------------------|-----------------------------|--------------------|-----------------------------|----------------------------|------------------------------|-----------------------------|-----------------------------|---------------------------------|--------------------------------------|-----------------------|---------------------------|--------------------------------|---------------------|-------------------------|----------------------------|-------------|------------------------|---------------------------|---------------------------------------|-----------------------------|------------------------------------|----------------------|-----------------------------------------|-------------------------------------------|---------------------------|-----------------------------------------|----------------------|------------------|----------------|----------------|
|                  |      |                                   |                      |                |                                          |       |                               | Laboring work points   | Farmyard manure work points | Sum of work points | subsidy work points by cash | Sum of work points by cash | Subsidy work points by grain | Sum of work points by grain | Grain distribution: rations | Grain distribution: work points | Grain distribution: subsidized grain |                       | Grain distribution: sum   | Grain distribution: per capita | Income: work points | Income: welfare subsidy | Income: prepaied overdraft | Income: sum | Deducted amount: grain | Deducted amount: firewood | Deducted amount: other things in kind |                             | Deducted amount: withdraw advances | Deducted amount: sum | Distribution results: personal solution | Distribution results: collective solution | Distribution results: sum | Interpersonal relationship with leaders | Family class status2 | Number of leader | Name of leader | Term of office |
|                  |      |                                   |                      |                |                                          |       |                               |                        |                             |                    |                             |                            |                              |                             |                             |                                 |                                      |                       |                           |                                |                     |                         |                            |             |                        |                           |                                       |                             |                                    |                      |                                         |                                           |                           |                                         |                      |                  |                |                |
| 6                | 1974 | Wang Tingmei                      | poor peasant         | 7              | worker families of revolutionary martyrs |       | 5790                          | 1389                   | 7179                        |                    | 7179                        |                            | 7179                         | 1820                        | 372.94905                   |                                 | 2192.9491                            | 313.27844             | 1365                      | 215.37                         | 10                  | 225.37                  | 239.78                     |             | 7.6                    |                           | 247.38                                | -22.01                      |                                    | 7.01                 | -15.00                                  | 2                                         | 3                         | 3                                       | Wang Zhengcai        | 1                |                |                |
| 7                | 1974 | Wang Tingxi                       | poor peasant         | 3.8            |                                          |       | 1249                          | 166                    | 1415                        |                    | 1415                        | 3250                       | 4665                         | 988                         | 242.34675                   |                                 | 1230.3468                            | 323.77546             | 781                       | 42.45                          | 13.84               | 56.29                   | 134.82                     |             | 4.46                   |                           | 139.28                                | -82.99                      |                                    | -82.99               | 3                                       | 3                                         | 3                         | Wang Zhengcai                           | 1                    |                  |                |                |
| 8                | 1974 | Tingxi's Mother                   | poor peasant         | 1              |                                          |       | 0                             | 0                      | 0                           | 1350               | 1350                        | 1350                       | 260                          | 70.1325                     |                             | 330.1325                        | 330.1325                             | 203                   | 40.5                      | 0                              | 40.5                | 36.05                   |                            | 1.14        | 0.19                   | 37.38                     | 3.12                                  |                             | 3.12                               | 3                    | 3                                       | 3                                         | Wang Zhengcai             | 1                                       |                      |                  |                |                |
| 9                | 1974 | Wang Tingzhi                      | poor peasant         | 1              |                                          |       | 907                           | 337                    | 1244                        |                    | 1244                        |                            | 1244                         | 260                         | 64.6258                     |                                 | 324.6258                             | 324.6258              | 198                       | 37.32                          | 1.29                | 38.61                   | 35.47                      |             | 1.12                   |                           | 36.59                                 | 2.02                        | 1                                  |                      | 1.02                                    | 3                                         | 3                         | 3                                       | Wang Zhengcai        | 1                |                |                |
| 10               | 1974 | Wang Zuoxing                      | poor peasant         | 5              |                                          |       | 1572                          | 243                    | 1815                        |                    | 1815                        |                            | 1815                         | 1300                        | 94.28925                    |                                 | 1394.2893                            | 278.85785             | 936                       | 54.45                          | 20                  | 74.45                   | 153.44                     |             | 4.76                   |                           | 158.2                                 | -83.75                      |                                    | 13.75                | -70.00                                  | 3                                         | 3                         | 3                                       | Wang Zhengcai        | 1                |                |                |
| 11               | 1974 | Wang Zuoqi                        | poor peasant         | 5              |                                          |       | 4785                          | 955                    | 5740                        |                    | 5740                        |                            | 5740                         | 1300                        | 298.193                     |                                 | 1598.193                             | 319.6386              | 1000                      | 172.2                          | 1                   | 173.2                   | 174.8                      |             | 5.54                   |                           | 180.34                                | -7.14                       |                                    | 3.14                 | -4.00                                   | 3                                         | 3                         | 3                                       | Wang Zhengcai        | 1                |                |                |
| 12               | 1974 | Kaiying's mother                  | poor peasant         | 1              |                                          |       | 805                           | 459                    | 1264                        |                    | 1264                        |                            | 1264                         | 260                         | 65.6648                     |                                 | 325.6648                             | 325.6648              | 203                       | 37.92                          | 0                   | 37.92                   | 35.75                      |             | 1.14                   | 0.15                      | 37.04                                 | 0.88                        |                                    |                      | 0.88                                    | 3                                         | 3                         | 3                                       | Wang Zhengcai        | 1                |                |                |
| 14               | 1974 | Feng Kailing                      | landlord             | 2              |                                          |       | 3271                          | 399                    | 3670                        |                    | 3670                        |                            | 3670                         | 520                         | 190.6565                    |                                 | 710.6565                             | 355.32825             | 419                       | 110.1                          | 0                   | 110.1                   | 77.39                      |             | 2.5                    | 4.94                      | 84.83                                 | 25.27                       | 1                                  |                      | 24.27                                   | 3                                         | 1                         | 3                                       | Wang Zhengcai        | 1                |                |                |
| 15               | 1974 | Feng Zhaorui                      | landlord             | 6              |                                          |       | 8877                          | 745                    | 9622                        |                    | 9622                        |                            | 9622                         | 1560                        | 499.8629                    |                                 | 2059.8629                            | 343.31048             | 1243                      | 288.66                         | 0                   | 288.66                  | 224.65                     |             | 7.2                    | 10.37                     | 242.22                                | 46.44                       | 5.03                               |                      | 41.41                                   | 3                                         | 1                         | 3                                       | Wang Zhengcai        | 1                |                |                |
| 16               | 1974 | Wang Zuozhen                      | poor peasant         | 3              |                                          |       | 2067                          | 217                    | 2284                        |                    | 2284                        |                            | 2284                         | 780                         | 118.6538                    |                                 | 898.6538                             | 299.55127             | 585                       | 68.52                          | 7.16                | 75.68                   | 98.68                      |             | 3.1                    |                           | 101.78                                | -26.10                      |                                    | -26.10               | 2                                       | 3                                         | 3                         | Wang Zhengcai                           | 1                    |                  |                |                |
| 17               | 1974 | Chen Xuezhong                     | poor peasant         | 2              |                                          |       | 3291                          | 319                    | 3610                        |                    | 3610                        |                            | 3610                         | 520                         | 187.5395                    |                                 | 707.5395                             | 353.76975             | 421                       | 108.3                          | 0                   | 108.3                   | 77.11                      |             | 2.48                   | 5.64                      | 85.23                                 | 23.07                       | 4                                  |                      | 19.07                                   | 3                                         | 3                         | 3                                       | Wang Zhengcai        | 1                |                |                |
| 18               | 1974 | Feng Baojin                       | poor peasant         | 3              |                                          |       | 3026                          | 440                    | 3466                        |                    | 3466                        |                            | 3466                         | 780                         | 180.0587                    |                                 | 960.0587                             | 320.01957             | 591                       | 103.98                         | 5.26                | 109.24                  | 104.87                     |             | 3.34                   |                           | 108.21                                | 1.03                        |                                    |                      | 1.03                                    | 3                                         | 3                         | 3                                       | Wang Zhengcai        | 1                |                |                |
| 19               | 1974 | Feng Xianzhong                    | poor peasant         | 3              |                                          |       | 3297                          | 274                    | 3571                        |                    | 3571                        |                            | 3571                         | 780                         | 185.51345                   |                                 | 965.51345                            | 321.83782             | 597                       | 107.13                         | 3.26                | 110.39                  | 105.55                     |             | 3.36                   |                           | 108.91                                | 1.48                        |                                    |                      | 1.48                                    | 3                                         | 3                         | 3                                       | Wang Zhengcai        | 1                |                |                |
| 20               | 1974 | Feng Kaiyuan                      | poor peasant         | 7              |                                          |       | 5614                          | 920                    | 6534                        |                    | 6534                        |                            | 6534                         | 1820                        | 339.4413                    |                                 | 2159.4413                            | 308.49161             | 1374                      | 196.02                         | 7                   | 203.02                  | 236.61                     |             | 7.46                   |                           | 244.07                                | -41.05                      |                                    | 11.05                | -30.00                                  | 2                                         | 3                         | 3                                       | Wang Zhengcai        | 1                |                |                |
| 21               | 1974 | Feng Kaiwu                        | poor peasant         | 8              |                                          |       | 11289                         | 1029                   | 12318                       |                    | 12318                       |                            | 12318                        | 2080                        | 639.9201                    |                                 | 2719.9201                            | 339.99001             | 1619                      | 369.54                         | 0                   | 369.54                  | 296.79                     |             | 9.5                    | 0.75                      | 307.04                                | 62.50                       | 31                                 |                      | 31.50                                   | 3                                         | 3                         | 3                                       | Wang Zhengcai        | 1                |                |                |
| 22               | 1974 | Feng Kaiwen                       | poor peasant         | 8              |                                          |       | 9266                          | 677                    | 9943                        |                    | 9943                        |                            | 9943                         | 2080                        | 516.53885                   |                                 | 2596.5389                            | 324.56736             | 1596                      | 298.29                         | 3                   | 301.29                  | 283.64                     |             | 9.02                   |                           | 292.66                                | 8.63                        |                                    |                      | 8.63                                    | 2                                         | 3                         | 3                                       | Wang Zhengcai        | 1                |                |                |
| 23               | 1974 | Kou Huaisheng                     | poor peasant         | 8              |                                          |       | 9341                          | 453                    | 9794                        |                    | 9794                        |                            | 9794                         | 2080                        | 508.7983                    |                                 | 2588.7983                            | 323.59979             | 1587                      | 293.82                         | 3                   | 296.82                  | 282.71                     |             | 9                      |                           | 291.71                                | 5.11                        |                                    |                      | 5.11                                    | 2                                         | 3                         | 3                                       | Wang Zhengcai        | 1                |                |                |
| 24               | 1974 | Anming's mother                   | landlord             | 1              |                                          |       | 834                           | 119                    | 953                         |                    | 953                         |                            | 953                          | 260                         | 49.50835                    |                                 | 309.50835                            | 309.50835             | 196                       | 28.59                          | 2.15                | 30.74                   | 33.94                      |             | 1.08                   |                           | 35.02                                 | -4.28                       |                                    |                      | -4.28                                   | 2                                         | 1                         | 3                                       | Wang Zhengcai        | 1                |                |                |
| 25               | 1974 | Wang Xiujuan                      | poor peasant         | 3              |                                          |       | 2450                          | 526                    | 2976                        |                    | 2976                        |                            | 2976                         | 780                         | 154.6032                    |                                 | 934.6032                             | 311.5344              | 590                       | 89.28                          | 3.56                | 92.84                   | 102.35                     |             | 3.24                   |                           | 105.59                                | -12.75                      |                                    | 8.31                 | -4.44                                   | 3                                         | 3                         | 3                                       | Wang Zhengcai        | 1                |                |                |
| 26               | 1974 | Feng Zhaobu                       | middle-class peasant | 4              | worker                                   |       | 1638                          | 334                    | 1972                        |                    | 1972                        | 2600                       | 4572                         | 1040                        | 237.5154                    |                                 | 1277.5154                            | 319.37885             | 794                       | 59.16                          | 26.61               | 85.77                   | 139.71                     |             | 4.6                    |                           | 144.31                                | -58.54                      |                                    | -58.54               | 3                                       | 2                                         | 3                         | Wang Zhengcai                           | 1                    |                  |                |                |
| 27               | 1974 | Feng Zhaohuan                     | middle-class peasant | 6              |                                          |       | 2195                          | 445                    | 2640                        |                    | 2640                        |                            | 2640                         | 1560                        | 137.148                     |                                 | 1697.148                             | 282.858               | 1141                      | 79.2                           |                     | 24.24                   | 103.44                     | 186.82      |                        | 5.8                       |                                       | 192.62                      | -89.18                             |                      | -89.18                                  | 3                                         | 2                         | 3                                       | Wang Zhengcai        | 1                |                |                |
| 28               | 1974 | Zhaohuan's mother                 | middle-class peasant | 1              |                                          |       | 1300                          | 0                      | 1300                        |                    | 1300                        |                            | 1300                         | 260                         | 67.535                      |                                 | 327.535                              | 327.535               | 201                       | 39                             | 0                   | 39                      | 35.82                      |             | 1.14                   |                           | 36.96                                 | 2.04                        |                                    |                      | 2.04                                    | 3                                         | 2                         | 3                                       | Wang Zhengcai        | 1                |                |                |
| 29               | 1974 | Feng Kaijun                       | poor peasant         | 10             |                                          |       | 11062                         | 961                    | 12023                       |                    | 12023                       |                            | 12023                        | 2600                        | 624.59485                   |                                 | 3224.5949                            | 322.45949             | 2000                      | 360.69                         | 4                   | 364.69                  | 352.5                      |             | 11.2                   |                           | 363.7                                 | 0.99                        |                                    |                      | 0.99                                    | 2                                         | 3                         | 3                                       | Wang Zhengcai        | 1                |                |                |
| 30               | 1974 | Feng Kaizheng                     | poor peasant         | 8.4            | soldier                                  |       | 8625                          | 1066                   | 9691                        | 1000               | 10691                       |                            | 10691                        | 2184                        | 555.39745                   |                                 | 2739.3975                            | 326.11874             | 1757                      | 320.73                         | 0                   | 320.73                  | 300.35                     |             | 9.04                   |                           | 309.39                                | 11.34                       |                                    | 11.34                | 2                                       | 3                                         | 3                         | Wang Zhengcai                           | 1                    |                  |                |                |
| 31               | 1974 | Feng Zhaoxin                      | poor peasant         | 6.8            |                                          |       | 6201                          | 773                    | 6974                        |                    | 6974                        |                            | 6974                         | 1768                        | 362.2993                    |                                 | 2130.2993                            | 313.27931             | 1399                      | 209.22                         | 5.57                | 214.79                  | 223.69                     |             | 6.68                   |                           | 230.37                                | -15.58                      |                                    | -15.58               | 2                                       | 3                                         | 3                         | Wang Zhengcai                           | 1                    |                  |                |                |

(cont.)

| Household number | Year | Name of the head of the household | Family class status  | Family members | Family characters | Labor | Number of standard population | Work points settlement |                             |                    |                             | Grain distribution         |                              |                             |                             |                                 | Firewood distribution | Work points income (Yuan)            |                         |                                |                     | Deducted amount (Yuan)  |                           |             |                        |                           | Distribution results (Yuan) | Distribution results (Yuan)           |                                    |                      |                                         | Guanxi                                    |                           |                                         |                      |                  |                |                |
|------------------|------|-----------------------------------|----------------------|----------------|-------------------|-------|-------------------------------|------------------------|-----------------------------|--------------------|-----------------------------|----------------------------|------------------------------|-----------------------------|-----------------------------|---------------------------------|-----------------------|--------------------------------------|-------------------------|--------------------------------|---------------------|-------------------------|---------------------------|-------------|------------------------|---------------------------|-----------------------------|---------------------------------------|------------------------------------|----------------------|-----------------------------------------|-------------------------------------------|---------------------------|-----------------------------------------|----------------------|------------------|----------------|----------------|
|                  |      |                                   |                      |                |                   |       |                               | laboring work points   | Farmyard manure work points | Sum of work points | subsidy work points by cash | Sum of work points by cash | Subsidy work points by grain | Sum of work points by grain | Grain distribution: rations | Grain distribution: work points |                       | Grain distribution: subsidized grain | Grain distribution: sum | Grain distribution: per capita | Income: work points | Income: welfare subsidy | Income: prepaid overdraft | Income: sum | Deducted amount: grain | Deducted amount: firewood |                             | Deducted amount: other things in kind | Deducted amount: withdraw advances | Deducted amount: sum | Distribution results: personal solution | Distribution results: collective solution | Distribution results: sum | Interpersonal relationship with leaders | Family class status2 | Number of leader | Name of leader | Term of office |
| 32               | 1974 | Wang Xiangyun                     | middle-class peasant | 6              |                   |       |                               | 5307                   | 1769                        | 7076               |                             | 7076                       |                              | 7076                        | 1560                        | 367.5982                        |                       | 1927.5982                            | 321.26637               | 1217                           | 212.28              |                         | 1.86                      | 214.14      | 211.06                 |                           | 6.7                         |                                       | 217.76                             | -3.62                |                                         |                                           | -3.62                     | 2                                       | 2                    | 3                | Wang Zhengcai  | 1              |
| 33               | 1974 | Wang Xuewen                       | middle-class peasant | 3              |                   |       |                               | 4803                   | 396                         | 5199               |                             | 5199                       |                              | 5199                        | 780                         | 270.08805                       |                       | 1050.0881                            | 350.02935               | 626                            | 155.97              |                         |                           | 155.97      | 114.39                 |                           | 3.68                        | 6.8                                   | 124.87                             | 31.10                |                                         |                                           | 31.10                     | 3                                       | 2                    | 3                | Wang Zhengcai  | 1              |
| 34               | 1974 | Feng Xiuchang                     | middle-class peasant | 4              |                   |       |                               | 6393                   | 465                         | 6858               |                             | 6858                       |                              | 6858                        | 1040                        | 356.2731                        |                       | 1396.2731                            | 349.06828               | 832                            | 205.74              |                         |                           | 205.74      | 152.18                 |                           | 4.9                         | 7.81                                  | 164.89                             | 40.85                | 14.2                                    |                                           | 26.65                     | 2                                       | 2                    | 3                | Wang Zhengcai  | 1              |
| 35               | 1974 | Feng Xianhua                      | middle-class peasant | 2              |                   |       |                               | 2947                   | 384                         | 3331               |                             | 3331                       |                              | 3331                        | 520                         | 173.04545                       |                       | 693.04545                            | 346.52273               | 401                            | 99.93               |                         |                           | 99.93       | 75.32                  |                           | 2.4                         | 2.7                                   | 80.42                              | 19.51                | 4.02                                    |                                           | 15.49                     | 3                                       | 2                    | 3                | Wang Zhengcai  | 1              |
| 36               | 1974 | Feng Xiaoxi                       | middle-class peasant | 5              |                   |       |                               | 6234                   | 611                         | 6845               |                             | 6845                       |                              | 6845                        | 1300                        | 355.59775                       |                       | 1655.5978                            | 331.11955               | 1040                           | 205.35              |                         |                           | 205.35      | 181.2                  |                           | 5.74                        | 6.06                                  | 193                                | 12.35                | 8.06                                    |                                           | 4.29                      | 3                                       | 2                    | 3                | Wang Zhengcai  | 1              |
| 37               | 1974 | Feng Xiangui                      | middle-class peasant | 7              |                   |       |                               | 4217                   | 832                         | 5049               |                             | 5049                       |                              | 5049                        | 1820                        | 262.29555                       |                       | 2082.2956                            | 297.47079               | 1361                           | 151.47              |                         | 6                         | 157.47      | 228.72                 |                           | 7.16                        |                                       | 235.88                             | -78.41               |                                         | 44.41                                     | -34.00                    | 2                                       | 2                    | 3                | Wang Zhengcai  | 1              |
| 38               | 1974 | Feng Xianzhen                     | middle-class peasant | 5              |                   |       |                               | 7156                   | 728                         | 7884               |                             | 7884                       |                              | 7884                        | 1300                        | 409.5738                        |                       | 1709.5738                            | 341.91476               | 1018                           | 236.52              |                         |                           | 236.52      | 186.27                 |                           | 5.94                        | 2.6                                   | 194.81                             | 41.71                | 9                                       |                                           | 32.71                     | 2                                       | 2                    | 3                | Wang Zhengcai  | 1              |
| 39               | 1974 | Feng Xianxue                      | middle-class peasant | 4              |                   |       |                               | 4828                   | 334                         | 5162               |                             | 5162                       |                              | 5162                        | 1040                        | 268.1659                        |                       | 1308.1659                            | 327.04148               | 805                            | 154.86              |                         |                           | 154.86      | 142.88                 |                           | 4.46                        |                                       | 147.34                             | 7.52                 |                                         |                                           | 7.52                      | 2                                       | 2                    | 3                | Wang Zhengcai  | 1              |
| 40               | 1974 | Wang Tingpin                      | poor peasant         | 2              |                   |       |                               | 3932                   | 590                         | 4522               |                             | 4522                       |                              | 4522                        | 520                         | 234.9179                        |                       | 754.9179                             | 377.45895               | 427                            | 135.66              |                         |                           | 135.66      | 81.91                  |                           | 2.66                        | 7.75                                  | 92.32                              | 43.34                | 4.09                                    |                                           | 39.25                     | 2                                       | 3                    | 3                | Wang Zhengcai  | 1              |
| 41               | 1974 | Wang Zhengfen                     | middle-class peasant | 3              |                   |       |                               | 5165                   | 484                         | 5649               |                             | 5649                       |                              | 5649                        | 780                         | 293.46555                       |                       | 1073.4656                            | 357.82185               | 630                            | 169.47              |                         |                           | 169.47      | 116.85                 |                           | 3.76                        | 7.93                                  | 128.54                             | 40.93                |                                         |                                           | 40.93                     | 2                                       | 2                    | 3                | Wang Zhengcai  | 1              |
| 42               | 1974 | Wu Zongxiu                        | middle-class peasant | 1              |                   |       |                               | 2148                   | 344                         | 2492               |                             | 2492                       |                              | 2492                        | 260                         | 129.4594                        |                       | 389.4594                             | 389.4594                | 217                            | 74.76               |                         |                           | 74.76       | 42.26                  |                           | 2.26                        | 5.15                                  | 49.67                              | 25.09                |                                         |                                           | 25.09                     | 3                                       | 2                    | 3                | Wang Zhengcai  | 1              |
| 43               | 1974 | Wang Depo                         | poor peasant         | 6              |                   |       |                               | 5044                   | 518                         | 5562               |                             | 5562                       |                              | 5562                        | 1560                        | 288.9459                        |                       | 1848.9459                            | 308.15765               | 1176                           | 166.86              |                         | 7                         | 173.86      | 202.24                 |                           | 6.4                         |                                       | 208.64                             | -34.78               |                                         | 10.78                                     | -24.00                    | 2                                       | 3                    | 3                | Wang Zhengcai  | 1              |
| 44               | 1974 | Wang Dexue                        | poor peasant         | 2              |                   |       |                               | 2325                   | 254                         | 2579               |                             | 2579                       |                              | 2579                        | 520                         | 133.97905                       |                       | 653.97905                            | 326.98953               | 404                            | 77.37               |                         |                           | 77.37       | 71.46                  |                           | 1.92                        |                                       | 73.38                              | 3.99                 | 2.11                                    |                                           | 1.88                      | 2                                       | 3                    | 3                | Wang Zhengcai  | 1              |
| 45               | 1974 | Wang Dekuan                       | poor peasant         | 3              |                   |       |                               | 3211                   | 0                           | 3211               |                             | 3211                       |                              | 3211                        | 780                         | 166.81145                       |                       | 946.81145                            | 315.60382               | 604                            | 96.33               |                         |                           | 96.33       | 103.76                 |                           | 3                           |                                       | 106.76                             | -10.43               |                                         | 5.43                                      | -5.00                     | 2                                       | 3                    | 3                | Wang Zhengcai  | 1              |
| 46               | 1974 | Wang Tingzhen                     | poor peasant         | 7              | handicapped       |       |                               | 2164                   | 327                         | 2491               | 6100                        | 8591                       |                              | 8591                        | 1820                        | 446.30245                       |                       | 2266.3025                            | 323.75749               | 1399                           | 257.73              |                         | 2                         | 259.73      | 248.19                 |                           | 7.86                        |                                       | 256.05                             | 3.68                 | 2.29                                    |                                           | 1.39                      | 2                                       | 3                    | 3                | Wang Zhengcai  | 1              |
| 47               | 1974 | Wang Tingjian                     | poor peasant         | 8              |                   |       |                               | 12125                  | 680                         | 12805              |                             | 12805                      |                              | 12805                       | 2080                        | 665.21975                       |                       | 2745.2198                            | 343.15247               | 1660                           | 384.15              |                         |                           | 384.15      | 299.5                  |                           | 9.6                         | 14.71                                 | 323.81                             | 60.34                |                                         |                                           | 60.34                     | 2                                       | 3                    | 3                | Wang Zhengcai  | 1              |
| 48               | 1974 | Wang Zhengcai                     | poor peasant         | 6              |                   |       |                               | 6150                   | 690                         | 6840               |                             | 6840                       |                              | 6840                        | 1560                        | 355.338                         |                       | 1915.338                             | 319.223                 | 1182                           | 205.2               |                         | 2                         | 207.2       | 209.33                 |                           | 6.04                        |                                       | 215.37                             | -8.17                |                                         |                                           | -8.17                     | 1                                       | 3                    | 3                | Wang Zhengcai  | 1              |
| 49               | 1974 | Wang Zhengxuan                    | poor peasant         | 5              |                   |       |                               | 6174                   | 495                         | 6669               |                             | 6669                       |                              | 6669                        | 1300                        | 346.45455                       |                       | 1646.4546                            | 329.29091               | 1002                           | 200.07              |                         |                           | 200.07      | 179.73                 |                           | 5.74                        |                                       | 185.47                             | 14.60                | 7.4                                     |                                           | 7.20                      | 1                                       | 3                    | 3                | Wang Zhengcai  | 1              |
| 50               | 1974 | Chao Jingzhi                      | poor peasant         | 1              |                   |       |                               | 1024                   | 0                           | 1024               |                             | 1024                       |                              | 1024                        | 260                         | 53.1968                         |                       | 313.1968                             | 313.1968                | 200                            | 30.72               |                         |                           | 30.72       | 34.3                   |                           | 1.08                        |                                       | 35.38                              | -4.66                |                                         | 2.66                                      | -2.00                     | 1                                       | 3                    | 3                | Wang Zhengcai  | 1              |
| 51               | 1974 | Chao Shengyu                      | poor peasant         | 2              | worker            |       |                               | 1201                   | 223                         | 1424               |                             | 1424                       | 850                          | 2274                        | 520                         | 118.1343                        |                       | 638.1343                             | 319.06715               | 395                            | 42.72               |                         | 8.41                      | 51.13       | 69.73                  |                           | 2.04                        |                                       | 71.77                              | -20.64               |                                         |                                           | -20.64                    | 1                                       | 3                    | 3                | Wang Zhengcai  | 1              |
| 52               | 1974 | Wang Zhengyan                     | poor peasant         | 2              |                   |       |                               | 4827                   | 221                         | 5048               |                             | 5048                       |                              | 5048                        | 520                         | 262.2436                        |                       | 782.2436                             | 391.1218                | 442                            | 151.44              |                         |                           | 151.44      | 84.83                  |                           | 2.76                        | 12.7                                  | 100.29                             | 51.15                | 25.92                                   |                                           | 25.23                     | 1                                       | 3                    | 3                | Wang Zhengcai  | 1              |

(cont.)

| Household number | Year | Name of the head of the household | Family class status  | Family members | Family characters | Labor | Number of standard population | Work points settlement |                             |                    |                             | Grain distribution         |                              |                             |                             |                                 | Firewood distribution | Work points income (Yuan)            |                         |                                |                     | Deducted amount (Yuan)  |                            |             |                        |                           | Distribution results (Yuan) | Distribution results (Yuan)           |                                    |                      |                                         | Guanxi                                    |                           |                                         |                      |                  |                |                |
|------------------|------|-----------------------------------|----------------------|----------------|-------------------|-------|-------------------------------|------------------------|-----------------------------|--------------------|-----------------------------|----------------------------|------------------------------|-----------------------------|-----------------------------|---------------------------------|-----------------------|--------------------------------------|-------------------------|--------------------------------|---------------------|-------------------------|----------------------------|-------------|------------------------|---------------------------|-----------------------------|---------------------------------------|------------------------------------|----------------------|-----------------------------------------|-------------------------------------------|---------------------------|-----------------------------------------|----------------------|------------------|----------------|----------------|
|                  |      |                                   |                      |                |                   |       |                               | Laboring work points   | Farmyard manure work points | Sum of work points | subsidy work points by cash | Sum of work points by cash | Subsidy work points by grain | Sum of work points by grain | Grain distribution: rations | Grain distribution: work points |                       | Grain distribution: subsidized grain | Grain distribution: sum | Grain distribution: per capita | Income: work points | Income: welfare subsidy | Income: prepaied overdraft | Income: sum | Deducted amount: grain | Deducted amount: firewood |                             | Deducted amount: other things in kind | Deducted amount: withdraw advances | Deducted amount: sum | Distribution results: personal solution | Distribution results: collective solution | Distribution results: sum | Interpersonal relationship with leaders | Family class status2 | Number of leader | Name of leader | Term of office |
|                  |      |                                   |                      |                |                   |       |                               |                        |                             |                    |                             |                            |                              |                             |                             |                                 |                       |                                      |                         |                                |                     |                         |                            |             |                        |                           |                             |                                       |                                    |                      |                                         |                                           |                           |                                         |                      |                  |                |                |
| 53               | 1974 | Wang Zhengkuan                    | poor peasant         | 9              |                   |       | 10501                         | 664                    | 11165                       | 11165              |                             | 11165                      | 2340                         | 580.02175                   |                             | 2920.0218                       | 324.44686             | 1815                                 | 334.95                  |                                | 334.95              | 319.33                  | 10.08                      |             | 329.41                 | 5.54                      | 2.45                        | 3.09                                  | 1                                  | 3                    | 3                                       | Wang Zhengcai                             | 1                         |                                         |                      |                  |                |                |
| 54               | 1974 | Wang Zhenggui                     | poor peasant         | 6              |                   |       | 7816                          | 913                    | 8729                        | 8729               |                             | 8729                       | 1560                         | 453.47155                   |                             | 2013.4716                       | 335.57859             | 1224                                 | 261.87                  |                                | 261.87              | 219.76                  | 7.02                       | 4.04        | 230.82                 | 31.05                     | 15.1                        | 15.95                                 | 1                                  | 3                    | 3                                       | Wang Zhengcai                             | 1                         |                                         |                      |                  |                |                |
| 55               | 1974 | Wang Tingxiang                    | poor peasant         | 2              |                   |       | 2072                          | 188                    | 2260                        | 2260               |                             | 2260                       | 520                          | 117.407                     |                             | 637.407                         | 318.7035              | 400                                  | 67.8                    | 1.46                           | 69.26               | 69.8                    | 2.22                       |             | 72.02                  | -2.76                     |                             | 2.36                                  | -0.40                              | 3                    | 3                                       | 3                                         | Wang Zhengcai             | 1                                       |                      |                  |                |                |
| 56               | 1974 | Wang Deshan                       | poor peasant         | 5              |                   |       | 3825                          | 751                    | 4576                        | 4576               |                             | 4576                       | 1300                         | 237.7232                    |                             | 1537.7232                       | 307.54464             | 984                                  | 137.28                  | 5                              | 142.28              | 168.56                  | 5.32                       |             | 173.88                 | -31.60                    |                             | 6.6                                   | -25.00                             | 3                    | 3                                       | 3                                         | Wang Zhengcai             | 1                                       |                      |                  |                |                |
| 57               | 1974 | Wang Deling                       | poor peasant         | 6              |                   |       | 3999                          | 427                    | 4426                        | 4426               |                             | 4426                       | 1560                         | 229.9307                    |                             | 1789.9307                       | 298.32178             | 1163                                 | 132.78                  | 10                             | 142.78              | 196.45                  | 6.16                       |             | 202.61                 | -59.83                    |                             | 24.83                                 | -35.00                             | 3                    | 3                                       | 3                                         | Wang Zhengcai             | 1                                       |                      |                  |                |                |
| 60               | 1974 | Feng Zhaoyuan                     | poor peasant         | 1              |                   |       | 1951                          | 0                      | 1951                        | 1951               |                             | 1951                       | 260                          | 101.35445                   |                             | 361.35445                       | 361.35445             | 0                                    | 58.53                   |                                | 58.53               | 36.1                    | 1.28                       | 3.69        | 41.07                  | 17.46                     |                             |                                       | 17.46                              | 3                    | 3                                       | 3                                         | Wang Zhengcai             | 1                                       |                      |                  |                |                |
| 61               | 1974 | Ge Zhengxian                      | poor peasant         | 1              |                   |       | 1951                          | 0                      | 1951                        | 1951               |                             | 1951                       | 260                          | 101.35445                   |                             | 361.35445                       | 361.35445             | 214                                  | 58.53                   |                                | 58.53               | 39.31                   | 1.28                       | 3.69        | 44.28                  | 14.25                     |                             |                                       | 14.25                              | 3                    | 3                                       | 3                                         | Wang Zhengcai             | 1                                       |                      |                  |                |                |
| 62               | 1974 | Niu Aiqin                         | educated youth       | 1              | educated youth    |       | 1776                          | 76                     | 1852                        | 1852               |                             | 1852                       | 260                          | 96.2114                     |                             | 356.2114                        | 356.2114              | 227                                  | 55.56                   |                                | 55.56               | 38.7                    | 1.26                       | 7.16        | 47.12                  | 8.44                      |                             |                                       | 8.44                               | 2                    | 4                                       | 3                                         | Wang Zhengcai             | 1                                       |                      |                  |                |                |
| 63               | 1974 | Wu Jihua                          | educated youth       | 1              | educated youth    |       | 2086                          | 76                     | 2162                        | 2162               |                             | 2162                       | 260                          | 112.3159                    |                             | 372.3159                        | 372.3159              | 227                                  | 64.86                   |                                | 64.86               | 40.3                    | 1.32                       | 7.16        | 48.78                  | 16.08                     |                             |                                       | 16.08                              | 2                    | 4                                       | 3                                         | Wang Zhengcai             | 1                                       |                      |                  |                |                |
| 64               | 1974 | Ge Dongping                       | educated youth       | 0.4            | educated youth    |       | 0                             | 0                      | 0                           | 0                  | 600                         | 600                        | 104                          | 31.17                       |                             | 135.17                          | 337.925               | 0                                    | 0                       |                                | 0                   | 13.5                    | 0                          |             | 13.5                   | -13.50                    |                             |                                       | -13.50                             | 2                    | 4                                       | 3                                         | Wang Zhengcai             | 1                                       |                      |                  |                |                |
| 65               | 1974 | Ge Huihui                         | educated youth       | 1              | educated youth    |       | 1584                          | 76                     | 1660                        | 1660               |                             | 1660                       | 260                          | 86.237                      |                             | 346.237                         | 346.237               | 227                                  | 49.8                    |                                | 49.8                | 37.71                   | 1.22                       | 1.68        | 40.61                  | 9.19                      |                             |                                       | 9.19                               | 2                    | 4                                       | 3                                         | Wang Zhengcai             | 1                                       |                      |                  |                |                |
| 68               | 1974 | Ma Lianjun                        | middle-class peasant | 9              |                   |       | 8185                          | 1371                   | 9556                        | 9556               |                             | 9556                       | 2340                         | 496.4342                    |                             | 2836.4342                       | 315.15936             | 1778                                 | 286.68                  | 8                              | 294.68              | 310.37                  | 9.84                       |             | 320.21                 | -25.53                    |                             |                                       | -25.53                             | 2                    | 2                                       | 3                                         | Wang Zhengcai             | 1                                       |                      |                  |                |                |
| 69               | 1974 | Feng Xiaolou                      | landlord             | 1              |                   |       | 2411                          | 408                    | 2819                        | 2819               |                             | 2819                       | 260                          | 146.44705                   |                             | 406.44705                       | 406.44705             | 229                                  | 84.57                   | 0                              | 84.57               | 44.14                   | 1.44                       | 8.54        | 54.12                  | 30.45                     | 1                           |                                       | 29.45                              | 3                    | 1                                       | 3                                         | Wang Zhengcai             | 1                                       |                      |                  |                |                |
| 77               | 1974 | Chen Huixing                      | poor peasant         | 1              |                   |       | 420                           | 0                      | 420                         | 420                |                             | 420                        | 260                          | 21.819                      |                             | 281.819                         | 281.819               | 0                                    | 12.6                    |                                | 12.6                | 28.1                    | 0.98                       |             | 29.08                  | -16.48                    |                             |                                       | -16.48                             | 2                    | 3                                       | 3                                         | Wang Zhengcai             | 1                                       |                      |                  |                |                |
| 31s              | 1974 | Feng Xianbao                      | poor peasant         | 2.6            |                   |       | 3344                          | 66                     | 3410                        | 3410               |                             | 3410                       | 676                          | 177.1495                    |                             | 853.1495                        | 328.13442             | 400                                  | 102.3                   | 1.5                            | 103.8               | 91.3                    | 3.32                       |             | 94.62                  | 9.18                      |                             |                                       | 9.18                               | 3                    | 3                                       | 3                                         | Wang Zhengcai             | 1                                       |                      |                  |                |                |
| 48s              | 1974 | Wang Jiaxun                       | poor peasant         | 1              |                   |       | 2410                          | 0                      | 2410                        | 2410               |                             | 2410                       | 260                          | 125.1995                    |                             | 385.1995                        | 385.1995              | 198                                  | 72.3                    |                                | 72.3                | 41.57                   | 1.36                       |             | 42.93                  | 29.37                     |                             |                                       | 29.37                              | 2                    | 3                                       | 3                                         | Wang Zhengcai             | 1                                       |                      |                  |                |                |
| 50d              | 1974 | Chao Shengxia                     | poor peasant         | 2              |                   |       | 3431                          | 481                    | 3912                        | 3912               |                             | 3912                       | 520                          | 203.2284                    |                             | 723.2284                        | 361.6142              | 435                                  | 117.36                  |                                | 117.36              | 78.83                   | 2.54                       | 3.87        | 85.24                  | 32.12                     | 6                           |                                       | 26.12                              | 2                    | 3                                       | 3                                         | Wang Zhengcai             | 1                                       |                      |                  |                |                |
| 1                | 1975 | Ma Zhenqi                         | middle-class peasant | 2              |                   |       | 1857                          | 67                     | 1924                        | 1924               |                             | 1924                       | 580                          | 92                          |                             | 672.1596                        |                       | 672                                  | 55.80                   | 4                              | 59.796              | 77.3                    | 0.8                        |             | 78.1                   | -18.30                    |                             | 7.3                                   | -11.00                             | 1                    | 2                                       | 4                                         | Wang Zhenggkuan           | 4                                       |                      |                  |                |                |
| 2                | 1975 | Wang Xinming                      | middle-class peasant | 7              |                   |       | 7719                          | 1978                   | 9697                        | 9697               | 3000                        | 12697                      | 2030                         | 608                         |                             | 2638.1863                       |                       | 2639                                 | 281.21                  | 7.23                           | 288.443             | 303.5                   | 4                          |             | 307.5                  | -19.06                    |                             |                                       | -19.06                             | 1                    | 2                                       | 4                                         | Wang Zhenggkuan           | 4                                       |                      |                  |                |                |
| 3                | 1975 | Feng Kaiying                      | poor peasant         | 5              |                   |       | 4827                          | 1198                   | 6025                        | 6025               |                             | 6025                       | 1450                         | 289                         |                             | 1738.5975                       |                       | 1739                                 | 174.73                  | 5                              | 179.725             | 200                     | 2.4                        |             | 202.4                  | -22.68                    |                             | 7.7                                   | -14.98                             | 2                    | 3                                       | 4                                         | Wang Zhengkuan            | 4                                       |                      |                  |                |                |
| 4                | 1975 | Wang Zuopeng                      | poor peasant         | 2              |                   |       | 4065                          | 155                    | 4220                        | 4220               |                             | 4220                       | 580                          | 202                         |                             | 782.138                         |                       | 782                                  | 122.38                  | 0                              | 122.38              | 89.9                    | 1.2                        | 8.07        | 99.17                  | 23.21                     |                             |                                       | 23.21                              | 1                    | 3                                       | 4                                         | Wang Zhengkuan            | 4                                       |                      |                  |                |                |
| 5                | 1975 | Wang Zuoliang                     | poor peasant         | 5              |                   |       | 5176                          | 439                    | 5615                        | 5615               |                             | 5615                       | 1450                         | 269                         |                             | 1718.9585                       |                       | 1720                                 | 162.84                  | 7                              | 169.835             | 197.8                   | 2.3                        |             | 200.1                  | -30.27                    |                             | 7.3                                   | -22.97                             | 1                    | 3                                       | 4                                         | Wang Zhengkuan            | 4                                       |                      |                  |                |                |
| 6                | 1975 | Wang Tingmei                      | poor peasant         | 7              |                   |       | 7890                          | 475                    | 8365                        | 8365               |                             | 8365                       | 2030                         | 401                         |                             | 2430.6835                       |                       | 2431                                 | 242.59                  | 6                              | 248.585             | 279.6                   | 3.3                        |             | 282.9                  | -34.32                    |                             | 7.3                                   | -27.02                             | 1                    | 3                                       | 4                                         | Wang Zhengkuan            | 4                                       |                      |                  |                |                |
| 7                | 1975 | Wang Tingxi                       | poor peasant         | 4              | worker            |       | 1216                          | 200                    | 1416                        | 1416               | 4200                        | 5616                       | 1160                         | 269                         |                             | 1429.0064                       |                       | 1429                                 | 41.06                   | 27.97                          | 69.034              | 164.3                   | 1.9                        |             | 166.2                  | -97.17                    |                             |                                       | -97.17                             | 1                    | 3                                       | 4                                         | Wang Zhengkuan            | 4                                       |                      |                  |                |                |

(cont.)

| Household number | Year | Name of the head of the household | Family class status  | Family members | Family characters                 | Labor | Number of standard population | Work points settlement |                             |                            |                              |                             | Grain distribution          |                                 |                                      |                         |                                | Firewood distribution | Work points income (Yuan) |                         |                            |             | Deducted amount (Yuan) |                           |                                       |                                    |                      | Distribution results (Yuan) | Distribution results (Yuan)             |                                           |                           |                                         | Guanxi               |                  |                |                |                |
|------------------|------|-----------------------------------|----------------------|----------------|-----------------------------------|-------|-------------------------------|------------------------|-----------------------------|----------------------------|------------------------------|-----------------------------|-----------------------------|---------------------------------|--------------------------------------|-------------------------|--------------------------------|-----------------------|---------------------------|-------------------------|----------------------------|-------------|------------------------|---------------------------|---------------------------------------|------------------------------------|----------------------|-----------------------------|-----------------------------------------|-------------------------------------------|---------------------------|-----------------------------------------|----------------------|------------------|----------------|----------------|----------------|
|                  |      |                                   |                      |                |                                   |       |                               | Sum of work points     | subsidy work points by cash | Sum of work points by cash | Subsidy work points by grain | Sum of work points by grain | Grain distribution: rations | Grain distribution: work points | Grain distribution: subsidized grain | Grain distribution: sum | Grain distribution: per capita |                       | Income: work points       | Income: welfare subsidy | Income: prepaied overdraft | Income: sum | Deducted amount: grain | Deducted amount: firewood | Deducted amount: other things in kind | Deducted amount: withdraw advances | Deducted amount: sum |                             | Distribution results: personal solution | Distribution results: collective solution | Distribution results: sum | Interpersonal relationship with leaders | Family class status2 | Number of leader | Name of leader | Term of office |                |
| 8                | 1975 | Tingxi's Mother                   | poor peasant         | 1              | families of revolutionary martyrs |       |                               | 0                      | 0                           | 0                          | 1550                         | 1550                        |                             | 1550                            | 290                                  | 74                      |                                | 364.245               |                           | 364                     | 44.95                      | 0           | 44.95                  | 41.9                      |                                       | 0.5                                | 0.92                 | 43.32                       | 1.63                                    |                                           |                           | 1.63                                    | 1                    | 3                | 4              | Wang Zhengkuan | 4              |
| 9                | 1975 | Wang Tingzhi                      | poor peasant         | 1              |                                   |       |                               | 801                    | 508                         | 1309                       |                              | 1309                        |                             | 1309                            | 290                                  | 63                      |                                | 352.7011              |                           | 353                     | 37.96                      | 0.82        | 38.781                 | 40.6                      |                                       | 0.5                                |                      | 41.1                        | -2.32                                   |                                           |                           | -2.32                                   | 2                    | 3                | 4              | Wang Zhengkuan | 4              |
| 10               | 1975 | Wang Zuoxing                      | poor peasant         | 5              |                                   |       |                               | 3839                   | 361                         | 4200                       |                              | 4200                        |                             | 4200                            | 1450                                 | 201                     |                                | 1651.18               |                           | 1652                    | 121.80                     | 17          | 138.8                  | 190                       |                                       | 2.1                                |                      | 192.1                       | -53.30                                  |                                           | 23.3                      | -30.00                                  | 2                    | 3                | 4              | Wang Zhengkuan | 4              |
| 11               | 1975 | Wang Zuoqi                        | poor peasant         | 5              |                                   |       |                               | 6208                   | 500                         | 6708                       |                              | 6708                        |                             | 6708                            | 1450                                 | 321                     |                                | 1771.3132             |                           | 1772                    | 194.53                     | 0.84        | 195.372                | 203.8                     |                                       | 2.6                                |                      | 206.4                       | -11.03                                  |                                           | 3.96                      | -7.07                                   | 2                    | 3                | 4              | Wang Zhengkuan | 4              |
| 12               | 1975 | Kaiying's mother                  | poor peasant         | 1              |                                   |       |                               | 1500                   | 0                           | 1500                       |                              | 1500                        |                             | 1500                            | 290                                  | 72                      |                                | 361.85                |                           | 362                     | 43.50                      | 0           | 43.5                   | 41.6                      |                                       | 0.5                                |                      | 42.1                        | 1.40                                    |                                           |                           | 1.40                                    | 2                    | 3                | 4              | Wang Zhengkuan | 4              |
| 14               | 1975 | Feng Kailing                      | landlord             | 2              |                                   |       | 2697                          | 82                     | 2779                        |                            | 2779                         |                             | 2779                        | 580                             | 133                                  |                         | 713.1141                       |                       | 713                       | 80.59                   | 2.03                       | 82.621      | 82                     |                           | 1                                     |                                    | 83                   | -0.38                       |                                         |                                           | -0.38                     | 3                                       | 1                    | 4                | Wang Zhengkuan | 4              |                |
| 15               | 1975 | Feng Zhaorui                      | landlord             | 6              |                                   |       | 10242                         | 632                    | 10874                       |                            | 10874                        |                             | 10874                       | 1740                            | 521                                  |                         | 2260.8646                      |                       | 2261                      | 315.35                  | 0                          | 315.346     | 260                    |                           | 3.3                                   | 14.03                              | 277.33               | 38.02                       | 1.5                                     |                                           | 36.52                     | 3                                       | 1                    | 4                | Wang Zhengkuan | 4              |                |
| 16               | 1975 | Wang Zuozhen                      | poor peasant         | 3              |                                   |       | 3042                          | 184                    | 3226                        |                            | 3226                         |                             | 3226                        | 870                             | 155                                  |                         | 1024.5254                      |                       | 1025                      | 93.55                   | 3.43                       | 96.984      | 117.9                  |                           | 1.4                                   |                                    | 119.3                | -22.32                      |                                         | 2.27                                      | -20.05                    | 2                                       | 3                    | 4                | Wang Zhengkuan | 4              |                |
| 17               | 1975 | Chen Xuezhong                     | poor peasant         | 2              |                                   |       | 3704                          | 162                    | 3866                        |                            | 3866                         |                             | 3866                        | 580                             | 185                                  |                         | 765.1814                       |                       | 765                       | 112.11                  | 0                          | 112.114     | 88                     |                           | 1.1                                   | 6.2                                | 95.3                 | 16.81                       | 5                                       |                                           | 11.81                     | 1                                       | 3                    | 4                | Wang Zhengkuan | 4              |                |
| 18               | 1975 | Feng Baojin                       | poor peasant         | 3              |                                   |       | 4142                          | 332                    | 4474                        |                            | 4474                         |                             | 4474                        | 870                             | 214                                  |                         | 1084.3046                      |                       | 1085                      | 129.75                  | 0                          | 129.746     | 124.8                  |                           | 1.5                                   | 1.49                               | 127.79               | 1.96                        |                                         |                                           | 1.96                      | 1                                       | 3                    | 4                | Wang Zhengkuan | 4              |                |
| 19               | 1975 | Feng Xianzhong                    | poor peasant         | 3.84           |                                   |       | 3260                          | 387                    | 3647                        |                            | 3647                         |                             | 3647                        | 1113.6                          | 175                                  |                         | 1288.2913                      |                       | 1288                      | 105.76                  | 0                          | 105.763     | 148.1                  |                           | 1.4                                   | 1.49                               | 150.99               | -45.23                      |                                         | 4.19                                      | -41.04                    | 3                                       | 3                    | 4                | Wang Zhengkuan | 4              |                |
| 20               | 1975 | Feng Kaiyuan                      | poor peasant         | 7              |                                   |       | 6958                          | 1227                   | 8185                        |                            | 8185                         |                             | 8185                        | 2030                            | 392                                  |                         | 2422.0615                      |                       | 2423                      | 237.37                  | 5                          | 242.365     | 278.6                  |                           | 3.3                                   |                                    | 281.9                | -39.54                      |                                         | 14.5                                      | -25.04                    | 2                                       | 3                    | 4                | Wang Zhengkuan | 4              |                |
| 21               | 1975 | Feng Kaiwu                        | poor peasant         | 4              |                                   |       | 7473                          | 522                    | 7995                        |                            | 7995                         |                             | 7995                        | 1160                            | 383                                  |                         | 1542.9605                      |                       | 1544                      | 231.86                  |                            | 231.855     | 177.6                  |                           | 2.3                                   | 13.83                              | 193.73               | 38.13                       | 4.8                                     |                                           | 33.33                     | 2                                       | 3                    | 4                | Wang Zhengkuan | 4              |                |
| 22               | 1975 | Feng Kaiwen                       | poor peasant         | 7              |                                   |       | 10081                         | 714                    | 10795                       |                            | 10795                        |                             | 10795                       | 2030                            | 517                                  |                         | 2547.0805                      |                       | 2548                      | 313.06                  |                            | 313.055     | 293                    |                           | 3.6                                   | 9.06                               | 305.66               | 7.39                        | 5.19                                    |                                           | 2.20                      | 1                                       | 3                    | 4                | Wang Zhengkuan | 4              |                |
| 23               | 1975 | Kou Huaisheng                     | poor peasant         | 8              |                                   |       | 10721                         | 499                    | 11220                       |                            | 11220                        |                             | 11220                       | 2320                            | 537                                  |                         | 2857.438                       |                       | 2858                      | 325.38                  | 0.1                        | 325.48      | 328.7                  |                           | 4                                     | 3.11                               | 335.81               | -10.33                      |                                         | 5.41                                      | -4.92                     | 1                                       | 3                    | 4                | Wang Zhengkuan | 4              |                |
| 24               | 1975 | Anming's mother                   | landlord             | 1              |                                   |       | 1265                          | 91                     | 1356                        |                            | 1356                         |                             | 1356                        | 290                             | 65                                   |                         | 354.9524                       |                       | 355                       | 39.32                   | 0.16                       | 39.484      | 40.8                   |                           | 0.5                                   |                                    | 41.3                 | -1.82                       |                                         |                                           | -1.82                     | 2                                       | 1                    | 4                | Wang Zhengkuan | 4              |                |
| 25               | 1975 | Wang Xiujuan                      | poor peasant         | 2.12           |                                   |       | 1946                          | 291                    | 2237                        |                            | 2237                         |                             | 2237                        | 614.8                           | 107                                  |                         | 721.9523                       |                       | 722                       | 64.87                   | 3                          | 67.873      | 83                     |                           | 0.9                                   |                                    | 83.9                 | -16.03                      |                                         | 8                                         | -8.03                     | 2                                       | 3                    | 4                | Wang Zhengkuan | 4              |                |
| 26               | 1975 | Feng Zhaobu                       | middle-class peasant | 4              | worker                            |       | 4130                          | 182                    | 4312                        |                            | 4312                         | 1400                        | 5712                        | 1160                            | 274                                  |                         | 1433.6048                      |                       | 1434                      | 125.05                  | 9.31                       | 134.358     | 164.9                  |                           | 2                                     |                                    | 166.9                | -32.54                      |                                         |                                           | -32.54                    | 1                                       | 2                    | 4                | Wang Zhengkuan | 4              |                |
| 27               | 1975 | Feng Zhaohuan                     | middle-class peasant | 6              |                                   |       |                               | 4481                   | 537                         | 5018                       |                              | 5018                        |                             | 5018                            | 1740                                 | 240                     |                                | 1980.3622             |                           | 1981                    | 145.52                     |             | 18.03                  | 163.552                   | 227.8                                 |                                    | 2.6                  |                             | 230.4                                   | -66.85                                    |                           | 6.87                                    | -59.98               | 2                | 2              | 4              | Wang Zhengkuan |
| 28               | 1975 | Zhaohuan's mother                 | middle-class peasant | 1              |                                   |       | 1500                          | 0                      | 1500                        |                            | 1500                         |                             | 1500                        | 290                             | 72                                   |                         | 361.85                         |                       | 362                       | 43.50                   |                            |             | 43.5                   | 41.6                      |                                       | 0.4                                |                      | 42                          | 1.50                                    |                                           |                           | 1.50                                    | 2                    | 2                | 4              | Wang Zhengkuan | 4              |
| 29               | 1975 | Feng Kaijun                       | poor peasant         | 9              |                                   |       | 11233                         | 1225                   | 12458                       |                            | 12458                        |                             | 12458                       | 2610                            | 597                                  |                         | 3206.7382                      |                       | 3208                      | 361.28                  |                            |             | 361.282                | 368.9                     |                                       | 4.4                                | 0.69                 | 373.99                      | -12.71                                  |                                           | 3.69                      | -9.02                                   | 2                    | 3                | 4              | Wang Zhengkuan | 4              |
| 30               | 1975 | Feng Kaizheng                     | poor peasant         | 8              |                                   |       | 8930                          | 470                    | 9400                        |                            | 9400                         |                             | 9400                        | 2320                            | 450                                  |                         | 2770.26                        |                       | 2771                      | 272.60                  | 4                          | 276.6       | 318.7                  |                           | 3.8                                   |                                    | 322.5                | -45.90                      |                                         | 15.9                                      | -30.00                    | 2                                       | 3                    | 4                | Wang Zhengkuan | 4              |                |
| 31               | 1975 | Feng Zhaoxin                      | poor peasant         | 6              |                                   |       | 6231                          | 694                    | 6925                        |                            | 6925                         |                             | 6925                        | 1740                            | 332                                  |                         | 2071.7075                      |                       | 2072                      | 200.83                  | 5                          | 205.825     | 238.3                  |                           | 2.8                                   |                                    | 241.1                | -35.28                      |                                         | 10.3                                      | -24.98                    | 3                                       | 3                    | 4                | Wang Zhengkuan | 4              |                |
| 32               | 1975 | Wang Xiangyun                     | middle-class peasant | 6              |                                   |       | 7228                          | 914                    | 8142                        |                            | 8142                         |                             | 8142                        | 1740                            | 390                                  |                         | 2130.0018                      |                       | 2131                      | 236.12                  | 3.55                       | 239.668     | 245.1                  |                           | 2.9                                   |                                    | 248                  | -8.33                       |                                         |                                           | -8.33                     | 3                                       | 2                    | 4                | Wang Zhengkuan | 4              |                |



(cont.)

| Household number | Year | Name of the head of the household | Family class status  | Family members | Family characters | Labor | Number of standard population | Work points settlement |                             |                    |                             |                            | Grain distribution           |                             |                             |                                 |                                      | Firewood distribution   | Work points income (Yuan)      |                     |                         |                           | Deducted amount (Yuan) |                        |                           |                                       |                                    | Distribution results (Yuan) | Distribution results (Yuan)             |                                           |                           | Guanxi                                  |                      |                  |                |                |
|------------------|------|-----------------------------------|----------------------|----------------|-------------------|-------|-------------------------------|------------------------|-----------------------------|--------------------|-----------------------------|----------------------------|------------------------------|-----------------------------|-----------------------------|---------------------------------|--------------------------------------|-------------------------|--------------------------------|---------------------|-------------------------|---------------------------|------------------------|------------------------|---------------------------|---------------------------------------|------------------------------------|-----------------------------|-----------------------------------------|-------------------------------------------|---------------------------|-----------------------------------------|----------------------|------------------|----------------|----------------|
|                  |      |                                   |                      |                |                   |       |                               | Laboring work points   | Farmyard manure work points | Sum of work points | subsidy work points by cash | Sum of work points by cash | Subsidy work points by grain | Sum of work points by grain | Grain distribution: rations | Grain distribution: work points | Grain distribution: subsidized grain | Grain distribution: sum | Grain distribution: per capita | Income: work points | Income: welfare subsidy | Income: prepaid overdraft | Income: sum            | Deducted amount: grain | Deducted amount: firewood | Deducted amount: other things in kind | Deducted amount: withdraw advances | Deducted amount: sum        | Distribution results: personal solution | Distribution results: collective solution | Distribution results: sum | Interpersonal relationship with leaders | Family class status2 | Number of leader | Name of leader | Term of office |
| 33               | 1975 | Wang Xuewen                       | middle-class peasant | 3              |                   |       |                               | 5212                   | 465                         | 5677               |                             | 5677                       |                              | 5677                        | 870                         | 272                             |                                      | 1141.9283               |                                |                     |                         |                           | 164.633                | 131.3                  | 1.6                       | 3.2                                   | 136.1                              | 28.53                       | 17.14                                   |                                           | 11.39                     | 2                                       | 2                    | 4                | Wang Zhengkuan | 4              |
| 34               | 1975 | Feng Xiuchang                     | middle-class peasant | 4              |                   |       |                               | 6751                   | 458                         | 7209               |                             | 7209                       |                              | 7209                        | 1160                        | 345                             |                                      | 1505.3111               |                                |                     |                         |                           | 209.061                | 173.2                  | 2.1                       | 8.63                                  | 183.93                             | 25.13                       | 12.19                                   |                                           | 12.94                     | 2                                       | 2                    | 4                | Wang Zhengkuan | 4              |
| 35               | 1975 | Feng Xianhua                      | middle-class peasant | 2              |                   |       |                               | 3636                   | 215                         | 3851               |                             | 3851                       |                              | 3851                        | 580                         | 184                             |                                      | 764.4629                |                                |                     |                         |                           | 111.679                | 88                     | 1.1                       | 5.07                                  | 94.17                              | 17.51                       | 9.23                                    |                                           | 8.28                      | 2                                       | 2                    | 4                | Wang Zhengkuan | 4              |
| 36               | 1975 | Feng Xiaoxi                       | middle-class peasant | 5              |                   |       |                               | 9042                   | 584                         | 9626               |                             | 9626                       |                              | 9626                        | 1450                        | 461                             |                                      | 1911.0854               |                                |                     |                         |                           | 279.154                | 219.9                  | 2.9                       | 18.25                                 | 241.05                             | 38.10                       | 15                                      |                                           | 23.10                     | 1                                       | 2                    | 4                | Wang Zhengkuan | 4              |
| 37               | 1975 | Feng Xiangui                      | middle-class peasant | 7              |                   |       |                               | 5643                   | 683                         | 6326               |                             | 6326                       |                              | 6326                        | 2030                        | 303                             |                                      | 2333.0154               |                                |                     | 8                       |                           | 191.454                | 268.4                  | 3.04                      |                                       | 271.44                             | -79.99                      |                                         | 39.94                                     | -40.05                    | 2                                       | 2                    | 4                | Wang Zhengkuan | 4              |
| 38               | 1975 | Feng Xianzhen                     | middle-class peasant | 5              |                   |       |                               | 9063                   | 619                         | 9682               |                             | 9682                       |                              | 9682                        | 1450                        | 464                             |                                      | 1913.7678               |                                |                     |                         |                           | 280.778                | 220.2                  | 2.5                       | 8.98                                  | 231.68                             | 49.10                       | 21.24                                   |                                           | 27.86                     | 2                                       | 2                    | 4                | Wang Zhengkuan | 4              |
| 39               | 1975 | Feng Xianxue                      | middle-class peasant | 4              |                   |       |                               | 5166                   | 268                         | 5434               | 300                         | 5734                       |                              | 5734                        | 1160                        | 275                             |                                      | 1434.6586               |                                |                     |                         |                           | 166.286                | 165                    | 2                         |                                       | 167                                | -0.71                       |                                         |                                           | -0.71                     | 1                                       | 2                    | 4                | Wang Zhengkuan | 4              |
| 40               | 1975 | Wang Tingpin                      | poor peasant         | 2              |                   |       |                               | 4702                   | 493                         | 5195               |                             | 5195                       |                              | 5195                        | 580                         | 249                             |                                      | 828.8405                |                                |                     |                         |                           | 150.66                 | 95.3                   | 1.3                       | 10.18                                 | 106.78                             | 43.88                       | 3                                       |                                           | 40.88                     | 1                                       | 3                    | 4                | Wang Zhengkuan | 4              |
| 41               | 1975 | Wang Zhengfen                     | middle-class peasant | 2.47           |                   |       |                               | 5488                   | 456                         | 5944               |                             | 5944                       |                              | 5944                        | 716.3                       | 285                             |                                      | 1001.0176               |                                |                     |                         |                           | 172.376                | 115.1                  | 1.4                       | 11.59                                 | 128.09                             | 44.29                       |                                         |                                           | 44.29                     | 2                                       | 2                    | 4                | Wang Zhengkuan | 4              |
| 42               | 1975 | Wu Zongxiu                        | middle-class peasant | 1              |                   |       |                               | 2440                   | 161                         | 2601               |                             | 2601                       |                              | 2601                        | 290                         | 125                             |                                      | 414.5879                |                                |                     |                         |                           | 75.429                 | 47.7                   | 0.6                       | 5.71                                  | 54.01                              | 21.42                       |                                         |                                           | 21.42                     | 3                                       | 2                    | 4                | Wang Zhengkuan | 4              |
| 43               | 1975 | Wang Depo                         | poor peasant         | 6              |                   |       |                               | 6823                   | 370                         | 7193               |                             | 7193                       |                              | 7193                        | 1740                        | 345                             |                                      | 2084.5447               |                                |                     | 5                       |                           | 213.597                | 239.8                  | 2.8                       |                                       | 242.6                              | -29.00                      |                                         | 10                                        | -19.00                    | 2                                       | 3                    | 4                | Wang Zhengkuan | 4              |
| 44               | 1975 | Wang Dexue                        | poor peasant         | 2              |                   |       |                               | 3177                   | 164                         | 3341               |                             | 3341                       |                              | 3341                        | 580                         | 160                             |                                      | 740.0339                |                                |                     |                         |                           | 96.889                 | 85.1                   | 1                         | 2.99                                  | 89.09                              | 7.80                        | 2                                       |                                           | 5.80                      | 1                                       | 3                    | 4                | Wang Zhengkuan | 4              |
| 45               | 1975 | Wang Dekuan                       | poor peasant         | 3              |                   |       |                               | 3823                   | 0                           | 3823               |                             | 3823                       |                              | 3823                        | 870                         | 183                             |                                      | 1053.1217               |                                |                     | 2.53                    |                           | 113.397                | 121.1                  | 1.5                       |                                       | 122.6                              | -9.20                       |                                         | 4.17                                      | -5.03                     | 1                                       | 3                    | 4                | Wang Zhengkuan | 4              |
| 46               | 1975 | Wang Tingzhen                     | poor peasant         | 7              |                   |       |                               | 3259                   | 214                         | 3473               | 6700                        | 10173                      |                              | 10173                       | 2030                        | 487                             |                                      | 2517.2867               |                                |                     |                         |                           | 295.02                 | 289.6                  | 3.4                       |                                       | 293                                | 2.02                        | 2                                       |                                           | 0.02                      | 1                                       | 3                    | 4                | Wang Zhengkuan | 4              |
| 47               | 1975 | Wang Tingjian                     | poor peasant         | 8              |                   |       |                               | 17166                  | 581                         | 17747              |                             | 17747                      |                              | 17747                       | 2320                        | 850                             |                                      | 3170.0813               |                                |                     |                         |                           | 514.663                | 364.8                  | 4.7                       | 30.46                                 | 399.96                             | 114.70                      | 58.5                                    |                                           | 56.20                     | 1                                       | 3                    | 4                | Wang Zhengkuan | 4              |
| 48               | 1975 | Wang Zhengcai                     | poor peasant         | 6              |                   |       |                               | 7755                   | 463                         | 8218               |                             | 8218                       |                              | 8218                        | 1740                        | 394                             |                                      | 2133.6422               |                                |                     | 3                       |                           | 241.322                | 245.4                  | 2.8                       |                                       | 248.2                              | -6.88                       |                                         | 1.9                                       | -4.98                     | 1                                       | 3                    | 4                | Wang Zhengkuan | 4              |
| 49               | 1975 | Wang Zhengxuan                    | poor peasant         | 4              |                   |       |                               | 4597                   | 936                         | 5533               | 500                         | 6033                       |                              | 6033                        | 1160                        | 289                             |                                      | 1448.9807               |                                |                     |                         |                           | 174.957                | 166.8                  | 2.1                       | 3.93                                  | 172.83                             | 2.13                        |                                         |                                           | 2.13                      | 1                                       | 3                    | 4                | Wang Zhengkuan | 4              |
| 50               | 1975 | Chao Jingzhi                      | poor peasant         | 1              |                   |       |                               | 2381                   | 16                          | 2397               |                             | 2397                       |                              | 2397                        | 290                         | 115                             |                                      | 404.8163                |                                |                     |                         |                           | 69.513                 | 46.6                   | 0.6                       | 4.32                                  | 51.52                              | 17.99                       |                                         |                                           | 17.99                     | 2                                       | 3                    | 4                | Wang Zhengkuan | 4              |
| 51               | 1975 | Chao Shengyu                      | poor peasant         | 2              | worker            |       |                               | 1435                   | 192                         | 1627               |                             | 1627                       | 1200                         | 2827                        | 580                         | 135                             |                                      | 715.4133                |                                |                     | 9.92                    |                           | 57.103                 | 82.3                   | 1                         |                                       | 83.3                               | -26.20                      |                                         |                                           | -26.20                    | 2                                       | 3                    | 4                | Wang Zhengkuan | 4              |
| 52               | 1975 | Wang Zhengyan                     | poor peasant         | 2              |                   |       |                               | 5330                   | 313                         | 5643               |                             | 5643                       |                              | 5643                        | 580                         | 270                             |                                      | 850.2997                |                                |                     |                         |                           | 163.647                | 97.9                   | 1.4                       | 16.29                                 | 115.59                             | 48.06                       | 16                                      |                                           | 32.06                     | 1                                       | 3                    | 4                | Wang Zhengkuan | 4              |
| 53               | 1975 | Wang Zhengkuan                    | poor peasant         | 9              |                   |       |                               | 11311                  | 752                         | 12063              | 300                         | 12363                      |                              | 12363                       | 2610                        | 592                             |                                      | 3202.1877               |                                |                     |                         |                           | 358.527                | 368.2                  | 4.3                       |                                       | 372.5                              | -13.97                      |                                         | 4                                         | -9.97                     | 1                                       | 3                    | 4                | Wang Zhengkuan | 4              |
| 54               | 1975 | Wang Zhenggui                     | poor peasant         | 6              |                   |       |                               | 9330                   | 1379                        | 10709              |                             | 10709                      |                              | 10709                       | 1740                        | 513                             |                                      | 2252.9611               |                                |                     |                         |                           | 310.561                | 259.2                  | 3.3                       | 10.29                                 | 272.79                             | 37.77                       | 20                                      |                                           | 17.77                     | 1                                       | 3                    | 4                | Wang Zhengkuan | 4              |



(cont.)

| Household number | Year | Name of the head of the household | Family class status  | Family members | Family characters | Labor | Number of standard population | Work points settlement |                             |                    |                             |                            | Grain distribution           |                             |                             |                                 |                                      | Firewood distribution | Work points income (Yuan) |                                |                     |                         | Deducted amount (Yuan)    |             |                        |                           |                                       | Distribution results (Yuan) | Distribution results (Yuan)        |                      |                                         | Guanxi                                    |                           |                                         |                      |                  |                |
|------------------|------|-----------------------------------|----------------------|----------------|-------------------|-------|-------------------------------|------------------------|-----------------------------|--------------------|-----------------------------|----------------------------|------------------------------|-----------------------------|-----------------------------|---------------------------------|--------------------------------------|-----------------------|---------------------------|--------------------------------|---------------------|-------------------------|---------------------------|-------------|------------------------|---------------------------|---------------------------------------|-----------------------------|------------------------------------|----------------------|-----------------------------------------|-------------------------------------------|---------------------------|-----------------------------------------|----------------------|------------------|----------------|
|                  |      |                                   |                      |                |                   |       |                               | Laboring work points   | Farmyard manure work points | Sum of work points | subsidy work points by cash | Sum of work points by cash | Subsidy work points by grain | Sum of work points by grain | Grain distribution: rations | Grain distribution: work points | Grain distribution: subsidized grain |                       | Grain distribution: sum   | Grain distribution: per capita | Income: work points | Income: welfare subsidy | Income: prepaid overdraft | Income: sum | Deducted amount: grain | Deducted amount: firewood | Deducted amount: other things in kind |                             | Deducted amount: withdraw advances | Deducted amount: sum | Distribution results: personal solution | Distribution results: collective solution | Distribution results: sum | Interpersonal relationship with leaders | Family class status2 | Number of leader | Name of leader |
| 55               | 1975 | Wang Tingxiang                    | poor peasant         | 1              |                   |       |                               | 0                      | 0                           | 0                  |                             | 0                          |                              | 290                         | 0                           |                                 | 290                                  |                       | 0.00                      | 4                              | 4                   | 33.4                    | 0.3                       |             | 33.7                   | -29.70                    |                                       | 19.7                        | -10.00                             | 2                    | 3                                       | 4                                         | Wang Zhengkuan            | 4                                       |                      |                  |                |
| 56               | 1975 | Wang Deshan                       | poor peasant         | 5              |                   |       |                               | 5069                   | 499                         | 5568               |                             | 5568                       |                              | 5568                        | 1450                        | 267                             |                                      | 1716.7072             |                           | 1717                           | 161.47              | 5                       | 166.472                   | 197.5       | 2.3                    |                           | 199.8                                 | -33.33                      |                                    | 10.3                 | -23.03                                  | 2                                         | 3                         | 4                                       | Wang Zhengkuan       | 4                |                |
| 57               | 1975 | Wang Deling                       | poor peasant         | 6              |                   |       |                               | 5235                   | 404                         | 5639               |                             | 5639                       |                              | 5639                        | 1740                        | 270                             |                                      | 2010.1081             |                           | 2011                           | 163.53              | 10                      | 173.531                   | 231.3       | 2.6                    |                           | 233.9                                 | -60.37                      |                                    | 25.4                 | -34.97                                  | 2                                         | 3                         | 4                                       | Wang Zhengkuan       | 4                |                |
| 60               | 1975 | Feng Zhaoyuan                     | poor peasant         | 1              |                   |       |                               | 2375                   | 0                           | 2375               |                             | 2375                       |                              | 2375                        | 290                         | 114                             |                                      | 403.7625              |                           | 404                            | 68.88               |                         |                           | 68.875      | 46.5                   | 0                         | 4.14                                  | 50.64                       | 18.24                              | 2                    | 3                                       | 4                                         | Wang Zhengkuan            | 4                                       |                      |                  |                |
| 61               | 1975 | Ge Zhengxian                      | poor peasant         | 1              |                   |       |                               | 2326                   | 83                          | 2409               |                             | 2409                       |                              | 2409                        | 290                         | 115                             |                                      | 405.3911              |                           | 405                            | 69.86               |                         |                           | 69.861      | 46.6                   | 0.6                       | 6.29                                  | 53.49                       | 16.37                              |                      | 16.37                                   | 3                                         | 3                         | 4                                       | Wang Zhengkuan       | 4                |                |
| 62               | 1975 | Niu Aiqin                         | educated youth       | 1              | educated youth    |       |                               | 1988                   | 88                          | 2076               |                             | 2076                       |                              | 2076                        | 290                         | 99                              |                                      | 389.4404              |                           | 390                            | 60.20               |                         |                           | 60.204      | 44.9                   | 0.6                       |                                       | 45.5                        | 14.70                              | 10.19                |                                         | 4.51                                      | 1                         | 4                                       | 4                    | Wang Zhengkuan   | 4              |
| 63               | 1975 | Wu Jihua                          | educated youth       | 0.5            | educated youth    |       |                               | 1627                   | 34                          | 1661               |                             | 1661                       |                              | 1661                        | 145                         | 80                              |                                      | 224.5619              |                           | 225                            | 48.17               |                         |                           | 48.169      | 25.9                   | 0                         | 5.65                                  | 31.55                       | 16.62                              | 16.65                |                                         | -0.03                                     | 1                         | 4                                       | 4                    | Wang Zhengkuan   | 4              |
| 65               | 1975 | Ge Huihui                         | educated youth       | 1              | educated youth    |       |                               | 2551                   | 88                          | 2639               |                             | 2639                       |                              | 2639                        | 290                         | 126                             |                                      | 416.4081              |                           | 417                            | 76.53               |                         |                           | 76.531      | 48                     | 0.7                       | 5.08                                  | 53.78                       | 22.75                              | 15.5                 |                                         | 7.25                                      | 1                         | 4                                       | 4                    | Wang Zhengkuan   | 4              |
| 68               | 1975 | Ma Lianjun                        | middle-class peasant | 9.61           | soldier           |       |                               | 10386                  | 1001                        | 11387              |                             | 11387                      |                              | 11387                       | 2786.9                      | 545                             |                                      | 3332.3373             |                           | 3333                           | 330.22              | 6                       | 336.223                   | 383.3       |                        | 4.6                       |                                       | 387.9                       | -51.68                             |                      | 16.7                                    | -34.98                                    | 2                         | 2                                       | 4                    | Wang Zhengkuan   | 4              |
| 69               | 1975 | Feng Xiaolou                      | landlord             | 1              |                   |       |                               | 1757                   | 557                         | 2314               |                             | 2314                       |                              | 2314                        | 290                         | 111                             |                                      | 400.8406              |                           | 401                            | 67.11               |                         |                           | 67.106      | 46.1                   | 0.6                       | 4.5                                   | 51.2                        | 15.91                              | 3                    |                                         | 12.91                                     | 3                         | 1                                       | 4                    | Wang Zhengkuan   | 4              |
| 77               | 1975 | Chen Huixing                      | poor peasant         | 2              |                   |       |                               | 3094                   | 0                           | 3094               |                             | 3094                       |                              | 3094                        | 580                         | 148                             |                                      | 728.2026              |                           | 728                            | 89.73               |                         |                           | 89.726      | 83.7                   | 1                         | 4.47                                  | 89.17                       | 0.56                               |                      | 0.56                                    | 3                                         | 3                         | 4                                       | Wang Zhengkuan       | 4                |                |
| 21s              | 1975 | Feng Zhaoqian                     | poor peasant         | 4              |                   |       |                               | 5420                   | 400                         | 5820               |                             | 5820                       |                              | 5820                        | 1160                        | 279                             |                                      | 1438.778              |                           | 1439                           | 168.78              |                         |                           | 168.78      | 165.5                  | 2                         |                                       | 167.5                       | 1.28                               |                      | 1.28                                    | 1                                         | 3                         | 4                                       | Wang Zhengkuan       | 4                |                |
| 30s              | 1975 | Feng Zhaobin                      | poor peasant         | 2              |                   |       |                               | 2788                   | 34                          | 2822               | 1500                        | 4322                       |                              | 4322                        | 580                         | 207                             |                                      | 787.0238              |                           | 787                            | 125.34              | 0                       |                           | 125.338     | 90.5                   | 1.2                       | 7.16                                  | 98.86                       | 26.48                              |                      | 26.48                                   | 2                                         | 3                         | 4                                       | Wang Zhengkuan       | 4                |                |
| 31s              | 1975 | Feng Xianbao                      | poor peasant         | 3              |                   |       |                               | 3660                   | 179                         | 3839               |                             | 3839                       |                              | 3839                        | 870                         | 184                             |                                      | 1053.8881             |                           | 1054                           | 111.33              | 3                       |                           | 114.331     | 121.2                  | 1.4                       |                                       | 122.6                       | -8.27                              |                      | -8.27                                   | 3                                         | 3                         | 4                                       | Wang Zhengkuan       | 4                |                |
| 48s              | 1975 | Wang Jiaxun                       | poor peasant         | 3              |                   |       |                               | 3920                   | 426                         | 4346               |                             | 4346                       |                              | 4346                        | 870                         | 208                             |                                      | 1078.1734             |                           | 1079                           | 126.03              |                         |                           | 126.034     | 124.1                  | 1.5                       |                                       | 125.6                       | 0.43                               |                      | 0.43                                    | 2                                         | 3                         | 4                                       | Wang Zhengkuan       | 4                |                |
| 50d              | 1975 | Chao Shengxia                     | poor peasant         | 2              |                   |       |                               | 3959                   | 226                         | 4185               |                             | 4185                       |                              | 4185                        | 580                         | 200                             |                                      | 780.4615              |                           | 781                            | 121.37              |                         |                           | 121.365     | 89.8                   | 1.2                       | 10.21                                 | 101.21                      | 20.16                              | 10                   |                                         | 10.16                                     | 1                         | 3                                       | 4                    | Wang Zhengkuan   | 4              |
| 1                | 1976 | Ma Zhenqi                         | middle-class peasant | 2              |                   |       |                               | 1586                   | 25                          | 1611               |                             | 1611                       |                              | 1611                        | 630                         | 110                             |                                      | 740                   |                           |                                | 59.61               | 2                       |                           | 61.607      | 81.4                   |                           |                                       | 81.4                        | -19.79                             |                      | 9.8                                     | -9.99                                     | 1                         | 2                                       | 4                    | Wang Zhenggkuan  | 4              |
| 2                | 1976 | Wang Xinming                      | middle-class peasant | 7              | teacher           |       |                               | 7225                   | 1256                        | 8481               |                             | 8481                       | 2500                         | 10981                       | 2205                        | 747                             |                                      | 2952                  |                           |                                | 313.80              |                         |                           | 313.797     | 324.7                  |                           |                                       | 324.7                       | -10.90                             |                      | -10.90                                  | 1                                         | 2                         | 4                                       | Wang Zhenggkuan      | 4                |                |
| 3                | 1976 | Feng Kaiying                      | poor peasant         | 5              |                   |       |                               | 4139                   | 823                         | 4962               |                             | 4962                       |                              | 4962                        | 1575                        | 337                             |                                      | 1912                  |                           |                                | 183.59              |                         |                           | 183.594     | 210.3                  |                           |                                       | 210.3                       | -26.71                             |                      | 15.7                                    | -11.01                                    | 2                         | 3                                       | 4                    | Wang Zhengkuan   | 4              |
| 4                | 1976 | Wang Zuopeng                      | poor peasant         | 2              |                   |       |                               | 3300                   | 259                         | 3559               |                             | 3559                       |                              | 3559                        | 630                         | 242                             |                                      | 872                   |                           |                                | 131.68              |                         |                           | 131.683     | 95.9                   |                           |                                       | 95.9                        | 35.78                              |                      | 35.78                                   | 1                                         | 3                         | 4                                       | Wang Zhengkuan       | 4                |                |
| 5                | 1976 | Wang Zuoliang                     | poor peasant         | 5              |                   |       |                               | 3898                   | 497                         | 4395               |                             | 4395                       |                              | 4395                        | 1575                        | 299                             |                                      | 1874                  |                           |                                | 162.62              | 2                       |                           | 164.615     | 206.1                  |                           |                                       | 206.1                       | -41.49                             |                      | 21.5                                    | -19.99                                    | 1                         | 3                                       | 4                    | Wang Zhengkuan   | 4              |
| 6                | 1976 | Wang Tingmei                      | poor peasant         | 7              |                   |       |                               | 4918                   | 304                         | 5222               |                             | 5222                       |                              | 5222                        | 2205                        | 355                             |                                      | 2560                  |                           |                                | 193.21              |                         |                           | 193.214     | 281.6                  |                           |                                       | 281.6                       | -88.39                             |                      | 40.4                                    | -47.99                                    | 1                         | 3                                       | 4                    | Wang Zhengkuan   | 4              |
| 7                | 1976 | Wang Tingxi                       | poor peasant         | 4              | worker            |       |                               | 1369                   | 87                          | 1456               |                             | 1456                       | 3100                         | 4556                        | 1260                        | 310                             |                                      | 1570                  |                           |                                | 53.87               |                         | 20                        | 73.872      | 172.7                  |                           |                                       | 172.7                       | -98.83                             |                      | -98.83                                  | 1                                         | 3                         | 4                                       | Wang Zhengkuan       | 4                |                |

APPENDIX B

(cont.)

| Household number | Year | Name of the head of the household | Family class status  | Family members | Family characters                 | Labor | Number of standard population | Work points settlement |                             |                    |                             |                            | Grain distribution           |                             |                             |                                 |                                      | Firewood distribution   | Work points income (Yuan)      |        |                     |                         | Deducted amount (Yuan)     |             |                        |                           |                                       | Distribution results (Yuan)        | Distribution results (Yuan) |        |                                         | Guanxi                                    |                           |                                         |                      |                  |                |                |
|------------------|------|-----------------------------------|----------------------|----------------|-----------------------------------|-------|-------------------------------|------------------------|-----------------------------|--------------------|-----------------------------|----------------------------|------------------------------|-----------------------------|-----------------------------|---------------------------------|--------------------------------------|-------------------------|--------------------------------|--------|---------------------|-------------------------|----------------------------|-------------|------------------------|---------------------------|---------------------------------------|------------------------------------|-----------------------------|--------|-----------------------------------------|-------------------------------------------|---------------------------|-----------------------------------------|----------------------|------------------|----------------|----------------|
|                  |      |                                   |                      |                |                                   |       |                               | Laboring work points   | Farmyard manure work points | Sum of work points | subsidy work points by cash | Sum of work points by cash | Subsidy work points by grain | Sum of work points by grain | Grain distribution: rations | Grain distribution: work points | Grain distribution: subsidized grain | Grain distribution: sum | Grain distribution: per capita |        | Income: work points | Income: welfare subsidy | Income: prepaied overdraft | Income: sum | Deducted amount: grain | Deducted amount: firewood | Deducted amount: other things in kind | Deducted amount: withdraw advances | Deducted amount: sum        |        | Distribution results: personal solution | Distribution results: collective solution | Distribution results: sum | Interpersonal relationship with leaders | Family class status2 | Number of leader | Name of leader | Term of office |
| 8                | 1976 | Tingxi's Mother                   | poor peasant         | 1              | families of revolutionary martyrs |       |                               | 0                      | 0                           | 0                  | 1300                        | 1300                       |                              | 1300                        | 315                         | 88                              |                                      | 403                     |                                |        | 48.10               |                         |                            | 48.1        | 44.3                   |                           |                                       | 44.3                               | 3.80                        | 2      |                                         | 1.80                                      | 1                         | 3                                       | 4                    | Wang Zhengkuan   | 4              |                |
| 9                | 1976 | Wang Tingzhi                      | poor peasant         | 1              |                                   |       |                               | 639                    | 259                         | 898                |                             | 898                        |                              | 898                         | 315                         | 61                              |                                      | 376                     |                                |        | 33.23               |                         |                            | 33.226      | 41.4                   |                           |                                       | 41.4                               | -8.17                       |        | 3.2                                     | -4.97                                     | 2                         | 3                                       | 4                    | Wang Zhengkuan   | 4              |                |
| 10               | 1976 | Wang Zuoxing                      | poor peasant         | 4              |                                   |       |                               | 3736                   | 266                         | 4002               |                             | 4002                       |                              | 4002                        | 1260                        | 272                             |                                      | 1532                    |                                |        | 148.07              | 1                       |                            | 149.074     | 168.5                  |                           |                                       | 168.5                              | -19.43                      |        | 9.4                                     | -10.03                                    | 2                         | 3                                       | 4                    | Wang Zhengkuan   | 4              |                |
| 11               | 1976 | Wang Zuoqi                        | poor peasant         | 5              |                                   |       |                               | 3853                   | 659                         | 4512               |                             | 4512                       |                              | 4512                        | 1575                        | 307                             |                                      | 1882                    |                                |        | 166.94              | 4                       |                            | 170.944     | 207                    |                           |                                       | 207                                | -36.06                      |        | 16.1                                    | -19.96                                    | 2                         | 3                                       | 4                    | Wang Zhengkuan   | 4              |                |
| 12               | 1976 | Kaiying's mother                  | poor peasant         | 1              |                                   |       |                               | 1200                   | 0                           | 1200               |                             | 1200                       |                              | 1200                        | 315                         | 82                              |                                      | 397                     |                                |        | 44.40               |                         |                            | 44.4        | 43.7                   |                           |                                       | 43.7                               | 0.70                        |        | 0.70                                    | 2                                         | 3                         | 4                                       | Wang Zhengkuan       | 4                |                |                |
| 14               | 1976 | Feng Kailing                      | landlord             | 2              |                                   |       | 2571                          | 99                     | 2670                        |                    | 2670                        |                            | 2670                         | 630                         | 182                         |                                 | 812                                  |                         |                                | 98.79  |                     |                         | 98.79                      | 89.3        |                        |                           | 89.3                                  | 9.49                               |                             | 9.49   | 3                                       | 1                                         | 4                         | Wang Zhengkuan                          | 4                    |                  |                |                |
| 15               | 1976 | Feng Zhaorui                      | landlord             | 5              |                                   |       | 6332                          | 410                    | 6742                        |                    | 6742                        |                            | 6742                         | 1575                        | 458                         |                                 | 2033                                 |                         |                                | 249.45 |                     |                         | 249.454                    | 223.6       |                        |                           | 223.6                                 | 25.85                              |                             | 25.85  | 3                                       | 1                                         | 4                         | Wang Zhengkuan                          | 4                    |                  |                |                |
| 16               | 1976 | Wang Zuozhen                      | poor peasant         | 3.83           |                                   |       | 2641                          | 138                    | 2779                        |                    | 2779                        |                            | 2779                         | 1206.45                     | 189                         |                                 | 1395.45                              |                         |                                | 102.82 |                     |                         | 102.823                    | 153.5       |                        |                           | 153.5                                 | -50.68                             |                             | 20.7   | -29.98                                  | 2                                         | 3                         | 4                                       | Wang Zhengkuan       | 4                |                |                |
| 17               | 1976 | Chen Xuezhong                     | poor peasant         | 2              |                                   |       | 3412                          | 260                    | 3672                        |                    | 3672                        |                            | 3672                         | 630                         | 250                         |                                 | 880                                  |                         |                                | 135.86 |                     |                         | 135.864                    | 96.8        |                        |                           | 96.8                                  | 39.06                              |                             | 39.06  | 1                                       | 3                                         | 4                         | Wang Zhengkuan                          | 4                    |                  |                |                |
| 18               | 1976 | Feng Baojin                       | poor peasant         | 3              |                                   |       | 3603                          | 388                    | 3991                        |                    | 3991                        |                            | 3991                         | 945                         | 271                         |                                 | 1216                                 |                         |                                | 147.67 |                     |                         | 147.667                    | 133.8       |                        |                           | 133.8                                 | 13.87                              | 7.99                        | 5.88   | 1                                       | 3                                         | 4                         | Wang Zhengkuan                          | 4                    |                  |                |                |
| 19               | 1976 | Feng Xianzhong                    | poor peasant         | 4              |                                   |       | 2524                          | 231                    | 2755                        |                    | 2755                        |                            | 2755                         | 1260                        | 187                         |                                 | 1447                                 |                         |                                | 101.94 |                     |                         | 101.935                    | 159.2       |                        |                           | 159.2                                 | -57.27                             |                             | 27.3   | -29.97                                  | 3                                         | 3                         | 4                                       | Wang Zhengkuan       | 4                |                |                |
| 20               | 1976 | Feng Kaiyuan                      | poor peasant         | 7              |                                   |       | 6671                          | 1076                   | 7747                        |                    | 7747                        |                            | 7747                         | 2205                        | 527                         |                                 | 2732                                 |                         |                                | 286.64 |                     |                         | 286.639                    | 300.5       |                        |                           | 300.5                                 | -13.86                             |                             | 7.9    | -5.96                                   | 2                                         | 3                         | 4                                       | Wang Zhengkuan       | 4                |                |                |
| 21               | 1976 | Feng Kaiwu                        | poor peasant         | 4              |                                   |       | 6148                          | 309                    | 6457                        |                    | 6457                        |                            | 6457                         | 1260                        | 439                         |                                 | 1699                                 |                         |                                | 238.91 |                     |                         | 238.909                    | 186.9       |                        |                           | 186.9                                 | 52.01                              |                             | 52.01  | 2                                       | 3                                         | 4                         | Wang Zhengkuan                          | 4                    |                  |                |                |
| 22               | 1976 | Feng Kaiwen                       | poor peasant         | 7              |                                   |       | 7567                          | 890                    | 8457                        |                    | 8457                        |                            | 8457                         | 2205                        | 575                         |                                 | 2780                                 |                         |                                | 312.91 |                     |                         | 312.909                    | 305.8       |                        |                           | 305.8                                 | 7.11                               | 1                           | 7.11   | 1                                       | 3                                         | 4                         | Wang Zhengkuan                          | 4                    |                  |                |                |
| 23               | 1976 | Kou Huaisheng                     | poor peasant         | 8              |                                   |       | 8981                          | 517                    | 9498                        |                    | 9498                        |                            | 9498                         | 2520                        | 646                         |                                 | 3166                                 |                         |                                | 351.43 | 2                   |                         | 351.426                    | 348.3       |                        |                           | 348.3                                 | 3.13                               | 1                           | 3.13   | 1                                       | 3                                         | 4                         | Wang Zhengkuan                          | 4                    |                  |                |                |
| 24               | 1976 | Anming's mother                   | landlord             | 1              |                                   |       | 915                           | 40                     | 955                         |                    | 955                         |                            | 955                          | 315                         | 65                          |                                 | 380                                  |                         |                                | 35.34  |                     |                         | 35.335                     | 41.8        |                        |                           | 41.8                                  | -6.47                              |                             | -6.47  | 2                                       | 1                                         | 4                         | Wang Zhengkuan                          | 4                    |                  |                |                |
| 25               | 1976 | Wang Xiujuan                      | poor peasant         | 2              |                                   |       | 1372                          | 222                    | 1594                        |                    | 1594                        |                            | 1594                         | 630                         | 108                         |                                 | 738                                  |                         |                                | 58.98  |                     |                         | 58.978                     | 81.2        |                        |                           | 81.2                                  | -22.22                             |                             | 12.2   | -10.02                                  | 2                                         | 3                         | 4                                       | Wang Zhengkuan       | 4                |                |                |
| 26               | 1976 | Feng Zhaobu                       | middle-class peasant | 4              | worker                            |       | 3604                          | 338                    | 3942                        |                    | 3942                        | 600                        | 4542                         | 1260                        | 309                         |                                 | 1569                                 |                         |                                | 145.85 | 4.2                 |                         | 145.854                    | 172.2       |                        |                           | 172.2                                 | -26.35                             |                             | -26.35 | 1                                       | 2                                         | 4                         | Wang Zhengkuan                          | 4                    |                  |                |                |
| 27               | 1976 | Feng Zhaohuan                     | middle-class peasant | 6              |                                   |       | 4120                          | 565                    | 4685                        |                    | 4685                        |                            | 4685                         | 1890                        | 319                         |                                 | 2209                                 |                         |                                | 173.35 |                     |                         | 173.345                    | 243         |                        |                           | 243                                   | -69.66                             |                             | 11.7   | -57.96                                  | 2                                         | 2                         | 4                                       | Wang Zhengkuan       | 4                |                |                |
| 28               | 1976 | Zhaohuan's mother                 | middle-class peasant | 1              |                                   |       | 1200                          | 0                      | 1200                        |                    | 1200                        |                            | 1200                         | 315                         | 82                          |                                 | 397                                  |                         |                                | 44.40  |                     |                         | 44.4                       | 43.7        |                        |                           | 43.7                                  | 0.70                               |                             | 0.70   | 2                                       | 2                                         | 4                         | Wang Zhengkuan                          | 4                    |                  |                |                |
| 29               | 1976 | Feng Kaijun                       | poor peasant         | 8              |                                   |       | 8526                          | 768                    | 9294                        |                    | 9294                        |                            | 9294                         | 2520                        | 632                         |                                 | 3152                                 |                         |                                | 343.88 | 5                   |                         | 343.878                    | 346.7       |                        |                           | 346.7                                 | -2.82                              |                             | -2.82  | 2                                       | 3                                         | 4                         | Wang Zhengkuan                          | 4                    |                  |                |                |
| 30               | 1976 | Feng Kaizheng                     | poor peasant         | 8              |                                   |       | 9142                          | 978                    | 10120                       |                    | 10120                       |                            | 10120                        | 2520                        | 688                         |                                 | 3208                                 |                         |                                | 374.44 |                     |                         | 374.44                     | 352.9       |                        |                           | 352.9                                 | 21.54                              | 10.01                       | 11.53  | 2                                       | 3                                         | 4                         | Wang Zhengkuan                          | 4                    |                  |                |                |
| 31               | 1976 | Feng Zhaoxin                      | poor peasant         | 6              |                                   |       | 6985                          | 472                    | 7457                        |                    | 7457                        |                            | 7457                         | 1890                        | 507                         |                                 | 2397                                 |                         |                                | 275.91 |                     |                         | 275.909                    | 263.7       |                        |                           | 263.7                                 | 12.21                              |                             | 12.21  | 3                                       | 3                                         | 4                         | Wang Zhengkuan                          | 4                    |                  |                |                |
| 32               | 1976 | Wang Xiangyun                     | middle-class peasant | 6.53           |                                   |       | 6112                          | 921                    | 7033                        |                    | 7033                        |                            | 7033                         | 2056.95                     | 478                         |                                 | 2534.95                              |                         |                                | 260.22 |                     |                         | 260.221                    | 278.9       |                        |                           | 278.9                                 | -18.68                             |                             | 8.7    | -9.98                                   | 3                                         | 2                         | 4                                       | Wang Zhengkuan       | 4                |                |                |

(cont.)

| Household number | Year | Name of the head of the household | Family class status  | Family members | Family characters | Labor | Number of standard population | Work points settlement |                             |                    |                             | Grain distribution         |                              |                             |                             |                                 | Firewood distribution | Work points income (Yuan)            |                         |                                |                     | Deducted amount (Yuan)  |                            |             |                        |                           | Distribution results (Yuan) | Distribution results (Yuan)           |                                    |                      |                                         | Guanxi                                    |                           |                                         |                      |                  |                |
|------------------|------|-----------------------------------|----------------------|----------------|-------------------|-------|-------------------------------|------------------------|-----------------------------|--------------------|-----------------------------|----------------------------|------------------------------|-----------------------------|-----------------------------|---------------------------------|-----------------------|--------------------------------------|-------------------------|--------------------------------|---------------------|-------------------------|----------------------------|-------------|------------------------|---------------------------|-----------------------------|---------------------------------------|------------------------------------|----------------------|-----------------------------------------|-------------------------------------------|---------------------------|-----------------------------------------|----------------------|------------------|----------------|
|                  |      |                                   |                      |                |                   |       |                               | laboring work points   | Farmyard manure work points | Sum of work points | subsidy work points by cash | Sum of work points by cash | Subsidy work points by grain | Sum of work points by grain | Grain distribution: rations | Grain distribution: work points |                       | Grain distribution: subsidized grain | Grain distribution: sum | Grain distribution: per capita | Income: work points | Income: welfare subsidy | Income: prepaied overdraft | Income: sum | Deducted amount: grain | Deducted amount: firewood |                             | Deducted amount: other things in kind | Deducted amount: withdraw advances | Deducted amount: sum | Distribution results: personal solution | Distribution results: collective solution | Distribution results: sum | Interpersonal relationship with leaders | Family class status2 | Number of leader | Name of leader |
| 33               | 1976 | Wang Xuewen                       | middle-class peasant | 3              |                   |       |                               | 4365                   | 224                         | 4589               |                             | 4589                       |                              | 4589                        | 945                         | 312                             |                       | 1257                                 |                         |                                | 169.79              |                         |                            | 169.793     | 138.3                  |                           |                             | 138.3                                 | 31.49                              | 2.5                  |                                         | 28.99                                     | 2                         | 2                                       | 4                    | Wang Zhengkuan   | 4              |
| 34               | 1976 | Feng Xianmin                      | middle-class peasant | 3              |                   |       |                               | 4564                   | 324                         | 4888               |                             | 4888                       |                              | 4888                        | 945                         | 332                             |                       | 1277                                 |                         |                                | 180.86              |                         |                            | 180.856     | 140.5                  |                           |                             | 140.5                                 | 40.36                              | 14                   |                                         | 26.36                                     | 2                         | 2                                       | 4                    | Wang Zhengkuan   | 4              |
| 35               | 1976 | Feng Xianhua                      | middle-class peasant | 2              |                   |       |                               | 2209                   | 202                         | 2411               |                             | 2411                       |                              | 2411                        | 630                         | 164                             |                       | 794                                  |                         |                                | 89.21               |                         |                            | 89.207      | 87.3                   |                           |                             | 87.3                                  | 1.91                               |                      |                                         | 1.91                                      | 2                         | 2                                       | 4                    | Wang Zhengkuan   | 4              |
| 36               | 1976 | Feng Xiaoxi                       | middle-class peasant | 5              |                   |       |                               | 7511                   | 349                         | 7860               |                             | 7860                       |                              | 7860                        | 1575                        | 534                             |                       | 2109                                 |                         |                                | 290.82              |                         |                            | 290.82      | 232                    |                           |                             | 232                                   | 58.82                              | 30.8                 |                                         | 28.02                                     | 1                         | 2                                       | 4                    | Wang Zhengkuan   | 4              |
| 37               | 1976 | Feng Xiangui                      | middle-class peasant | 7              |                   |       |                               | 5268                   | 416                         | 5684               |                             | 5684                       |                              | 5684                        | 2205                        | 387                             |                       | 2592                                 |                         |                                | 210.31              |                         |                            | 210.308     | 285.1                  |                           |                             | 285.1                                 | -74.79                             |                      | 44.8                                    | -29.99                                    | 2                         | 2                                       | 4                    | Wang Zhengkuan   | 4              |
| 38               | 1976 | Feng Xianzhen                     | middle-class peasant | 5              |                   |       |                               | 7573                   | 539                         | 8112               |                             | 8112                       |                              | 1575                        | 552                         | 2127                            |                       | 2679                                 |                         |                                | 300.14              |                         |                            | 300.144     | 234                    |                           |                             | 234                                   | 66.14                              | 23.5                 |                                         | 42.64                                     | 2                         | 2                                       | 4                    | Wang Zhengkuan   | 4              |
| 39               | 1976 | Feng Xianxue                      | middle-class peasant | 5              |                   |       |                               | 4406                   | 421                         | 4827               |                             | 4827                       |                              | 4827                        | 1575                        | 328                             |                       | 1903                                 |                         |                                | 178.60              |                         |                            | 178.599     | 209.3                  |                           |                             | 209.3                                 | -30.70                             |                      | 12.7                                    | -18.00                                    | 1                         | 2                                       | 4                    | Wang Zhengkuan   | 4              |
| 40               | 1976 | Wang Tingpin                      | poor peasant         | 2              |                   |       |                               | 3567                   | 514                         | 4081               |                             | 4081                       |                              | 4081                        | 630                         | 277                             |                       | 907                                  |                         |                                | 151.00              |                         |                            | 150.997     | 99.8                   |                           |                             | 99.8                                  | 51.20                              | 10                   |                                         | 41.20                                     | 1                         | 3                                       | 4                    | Wang Zhengkuan   | 4              |
| 41               | 1976 | Wang Zhengfen                     | middle-class peasant | 2              |                   |       |                               | 2597                   | 154                         | 2751               |                             | 2751                       |                              | 2751                        | 630                         | 187                             |                       | 817                                  |                         |                                | 101.79              |                         |                            | 101.787     | 89.9                   |                           |                             | 89.9                                  | 11.89                              | 7.5                  |                                         | 4.39                                      | 2                         | 2                                       | 4                    | Wang Zhengkuan   | 4              |
| 42               | 1976 | Wu Zongxiu                        | middle-class peasant | 1              |                   |       |                               | 1946                   | 156                         | 2102               |                             | 2102                       |                              | 315                         | 143                         | 458                             |                       | 601                                  |                         |                                | 77.77               |                         |                            | 77.774      | 50.4                   |                           |                             | 50.4                                  | 27.37                              |                      |                                         | 27.37                                     | 3                         | 2                                       | 4                    | Wang Zhengkuan   | 4              |
| 43               | 1976 | Wang Depo                         | poor peasant         | 6              |                   |       |                               | 5735                   | 637                         | 6372               |                             | 6372                       |                              | 6372                        | 1890                        | 433                             |                       | 2323                                 |                         |                                | 235.76              | 3                       |                            | 238.764     | 255.5                  |                           |                             | 255.5                                 | -16.74                             |                      | 7.7                                     | -9.04                                     | 2                         | 3                                       | 4                    | Wang Zhengkuan   | 4              |
| 44               | 1976 | Wang Dexue                        | poor peasant         | 2              |                   |       |                               | 2930                   | 0                           | 2930               |                             | 2930                       |                              | 2930                        | 630                         | 199                             |                       | 829                                  |                         |                                | 108.41              |                         |                            | 108.41      | 91.2                   |                           |                             | 91.2                                  | 17.21                              | 9                    |                                         | 8.21                                      | 1                         | 3                                       | 4                    | Wang Zhengkuan   | 4              |
| 45               | 1976 | Wang Dekuan                       | poor peasant         | 3              |                   |       |                               | 3538                   | 259                         | 3797               |                             | 3797                       |                              | 3797                        | 945                         | 258                             |                       | 1203                                 |                         |                                | 140.49              |                         |                            | 140.489     | 132.3                  |                           |                             | 132.3                                 | 8.19                               | 5.38                 |                                         | 2.81                                      | 1                         | 3                                       | 4                    | Wang Zhengkuan   | 4              |
| 46               | 1976 | Wang Tingzhen                     | poor peasant         | 7              | handicapped       |       |                               | 3700                   | 119                         | 3819               | 4600                        | 8419                       |                              | 8419                        | 2205                        | 572                             |                       | 2777                                 |                         |                                | 311.50              |                         |                            | 311.503     | 305.5                  |                           |                             | 305.5                                 | 6.00                               | 3.5                  |                                         | 2.50                                      | 1                         | 3                                       | 4                    | Wang Zhengkuan   | 4              |
| 47               | 1976 | Wang Tingjian                     | poor peasant         | 8.67           |                   |       |                               | 14789                  | 881                         | 15670              |                             | 15670                      |                              | 15670                       | 2731.05                     | 1065                            |                       | 3796.05                              |                         |                                | 579.79              |                         |                            | 579.79      | 417.6                  |                           |                             | 417.6                                 | 162.19                             | 30                   |                                         | 132.19                                    | 1                         | 3                                       | 4                    | Wang Zhengkuan   | 4              |
| 48               | 1976 | Wang Zhengcai                     | poor peasant         | 6              |                   |       |                               | 8587                   | 406                         | 8993               |                             | 8993                       |                              | 8993                        | 1890                        | 612                             |                       | 2502                                 |                         |                                | 332.74              |                         |                            | 332.741     | 275.2                  |                           |                             | 275.2                                 | 57.54                              | 37.33                |                                         | 20.21                                     | 1                         | 3                                       | 4                    | Wang Zhengkuan   | 4              |
| 49               | 1976 | Wang Zhengxuan                    | poor peasant         | 4              |                   |       |                               | 2919                   | 305                         | 3224               | 1400                        | 4624                       |                              | 4624                        | 1260                        | 314                             |                       | 1574                                 |                         |                                | 171.09              |                         |                            | 171.088     | 173.1                  |                           |                             | 173.1                                 | -2.01                              |                      | 2                                       | -0.01                                     | 1                         | 3                                       | 4                    | Wang Zhengkuan   | 4              |
| 50               | 1976 | Shengyu's mother                  | poor peasant         | 1              |                   |       |                               | 1469                   | 283                         | 1752               |                             | 1752                       |                              | 1752                        | 315                         | 119                             |                       | 434                                  |                         |                                | 64.82               |                         |                            | 64.824      | 47.7                   |                           |                             | 47.7                                  | 17.12                              | 12.1                 |                                         | 5.02                                      | 2                         | 3                                       | 4                    | Wang Zhengkuan   | 4              |
| 51               | 1976 | Chao Shengyu                      | poor peasant         | 3              | worker            |       |                               | 1054                   | 98                          | 1152               |                             | 1152                       | 2300                         | 3452                        | 945                         | 235                             |                       | 1180                                 |                         |                                | 42.62               |                         | 10                         | 52.624      | 129.8                  |                           |                             | 129.8                                 | -77.18                             |                      |                                         | -77.18                                    | 2                         | 3                                       | 4                    | Wang Zhengkuan   | 4              |
| 52               | 1976 | Wang Zhengyan                     | poor peasant         | 2              |                   |       |                               | 4622                   | 119                         | 4741               |                             | 4741                       |                              | 4741                        | 630                         | 322                             |                       | 952                                  |                         |                                | 175.42              |                         |                            | 175.417     | 104.7                  |                           |                             | 104.7                                 | 70.72                              | 12                   |                                         | 58.72                                     | 1                         | 3                                       | 4                    | Wang Zhengkuan   | 4              |
| 53               | 1976 | Wang Zhengkuan                    | poor peasant         | 9              |                   |       |                               | 11234                  | 829                         | 12063              |                             | 12063                      |                              | 12063                       | 2835                        | 820                             |                       | 3655                                 |                         |                                | 446.33              |                         |                            | 446.331     | 402.1                  |                           |                             | 402.1                                 | 44.23                              | 17.88                |                                         | 26.35                                     | 1                         | 3                                       | 4                    | Wang Zhengkuan   | 4              |
| 54               | 1976 | Wang Zhenggui                     | poor peasant         | 6              |                   |       |                               | 7473                   | 609                         | 8082               |                             | 8082                       |                              | 8082                        | 1890                        | 550                             |                       | 2440                                 |                         |                                | 299.03              |                         |                            | 299.034     | 268.4                  |                           |                             | 268.4                                 | 30.63                              |                      |                                         | 30.63                                     | 1                         | 3                                       | 4                    | Wang Zhengkuan   | 4              |

(cont.)

| Household number | Year | Name of the head of the household | Family class status  | Family members | Family characters                        | Labor | Number of standard population | Work points settlement |                             |                    |                             |                            | Grain distribution           |                             |                             |                                 |                                      | Firewood distribution | Work points income (Yuan) |                                |                     |                         | Deducted amount (Yuan)     |             |                        |                           |                                       | Distribution results (Yuan) | Distribution results (Yuan)        |                      |                                         | Guanxi                                    |                           |                                         |                      |                  |                  |                |                  |   |
|------------------|------|-----------------------------------|----------------------|----------------|------------------------------------------|-------|-------------------------------|------------------------|-----------------------------|--------------------|-----------------------------|----------------------------|------------------------------|-----------------------------|-----------------------------|---------------------------------|--------------------------------------|-----------------------|---------------------------|--------------------------------|---------------------|-------------------------|----------------------------|-------------|------------------------|---------------------------|---------------------------------------|-----------------------------|------------------------------------|----------------------|-----------------------------------------|-------------------------------------------|---------------------------|-----------------------------------------|----------------------|------------------|------------------|----------------|------------------|---|
|                  |      |                                   |                      |                |                                          |       |                               | Laboring work points   | Farmyard manure work points | Sum of work points | subsidy work points by cash | Sum of work points by cash | Subsidy work points by grain | Sum of work points by grain | Grain distribution: rations | Grain distribution: work points | Grain distribution: subsidized grain |                       | Grain distribution: sum   | Grain distribution: per capita | Income: work points | Income: welfare subsidy | Income: prepaied overdraft | Income: sum | Deducted amount: grain | Deducted amount: firewood | Deducted amount: other things in kind |                             | Deducted amount: withdraw advances | Deducted amount: sum | Distribution results: personal solution | Distribution results: collective solution | Distribution results: sum | Interpersonal relationship with leaders | Family class status2 | Number of leader | Name of leader   | Term of office |                  |   |
|                  |      |                                   |                      |                |                                          |       |                               |                        |                             |                    |                             |                            |                              |                             |                             |                                 |                                      |                       |                           |                                |                     |                         |                            |             |                        |                           |                                       |                             |                                    |                      |                                         |                                           |                           |                                         |                      |                  |                  |                |                  |   |
| 55               | 1976 | Wang Tingxiang                    | poor peasant         | 1              |                                          |       |                               | 0                      | 0                           | 0                  | 0                           |                            |                              |                             | 0                           | 315                             | 0                                    |                       | 315                       |                                | 0.00                |                         |                            |             | 0                      | 34.7                      |                                       |                             | 34.7                               | -34.70               |                                         | 14.7                                      | -20.00                    | 2                                       | 3                    | 4                | Wang Zhengkuan   | 4              |                  |   |
| 56               | 1976 | Wang Deshan                       | poor peasant         | 5              |                                          |       |                               | 4543                   | 563                         | 5106               | 5106                        |                            |                              |                             | 5106                        | 1575                            | 347                                  |                       | 1922                      |                                | 188.92              |                         |                            |             | 188.922                | 211.4                     |                                       |                             | 211.4                              | -22.48               |                                         | 10.5                                      | -11.98                    | 2                                       | 3                    | 4                | Wang Zhengkuan   | 4              |                  |   |
| 57               | 1976 | Wang Deling                       | poor peasant         | 6              |                                          |       |                               | 4279                   | 426                         | 4705               | 4705                        |                            |                              |                             | 4705                        | 1890                            | 320                                  |                       | 2210                      |                                | 174.09              |                         | 5                          |             | 179.085                | 243.1                     |                                       |                             | 243.1                              | -64.02               |                                         | 15                                        | -49.02                    | 2                                       | 3                    | 4                | Wang Zhengkuan   | 4              |                  |   |
| 60               | 1976 | Feng Zhaoyuan                     | poor peasant         | 1              |                                          |       |                               | 2277                   | 0                           | 2277               | 2277                        |                            |                              |                             | 2277                        | 315                             | 155                                  |                       | 470                       |                                | 84.25               |                         |                            |             | 84.249                 | 51.7                      |                                       |                             | 51.7                               | 32.55                | 8                                       |                                           | 24.55                     | 2                                       | 3                    | 4                | Wang Zhengkuan   | 4              |                  |   |
| 61               | 1976 | Ge Zhengxian                      | poor peasant         | 1              |                                          |       |                               | 1777                   | 5                           | 1782               | 1782                        |                            |                              |                             | 1782                        | 315                             | 121                                  |                       | 436                       |                                | 65.93               |                         |                            |             | 65.934                 | 48                        |                                       |                             | 48                                 | 17.93                |                                         | 17.93                                     | 3                         | 3                                       | 4                    | Wang Zhengkuan   | 4                |                |                  |   |
| 62               | 1976 | Niu Aiqin                         | educated youth       | 1              | educated youth                           |       |                               | 2346                   | 63                          | 2409               | 2409                        |                            |                              |                             | 2409                        | 315                             | 164                                  |                       | 479                       |                                | 89.13               |                         |                            |             | 89.133                 | 52.7                      |                                       |                             | 52.7                               | 36.43                | 25                                      |                                           | 11.43                     | 1                                       | 4                    | 4                | Wang Zhengkuan   | 4              |                  |   |
| 65               | 1976 | Ge Huihui                         | educated youth       | 1              | educated youth                           |       |                               | 1882                   | 63                          | 1945               | 1945                        |                            |                              |                             | 1945                        | 315                             | 132                                  |                       | 447                       |                                | 71.97               |                         |                            |             | 71.965                 | 49.2                      |                                       |                             | 49.2                               | 22.77                | 9                                       |                                           | 13.77                     | 1                                       | 4                    | 4                | Wang Zhengkuan   | 4              |                  |   |
| 68               | 1976 | Ma Lianjun                        | middle-class peasant | 10             |                                          |       |                               | 9942                   | 435                         | 10377              | 10377                       |                            |                              |                             | 10377                       | 3150                            | 706                                  |                       | 3856                      |                                | 383.95              |                         | 4                          |             | 387.949                | 424.2                     |                                       |                             | 424.2                              | -36.25               |                                         | 16.3                                      | -19.95                    | 2                                       | 2                    | 4                | Wang Zhengkuan   | 4              |                  |   |
| 69               | 1976 | Feng Xiaolou                      | landlord             | 1              |                                          |       |                               | 2784                   | 0                           | 2784               | 2784                        |                            |                              |                             | 2784                        | 315                             | 189                                  |                       | 504                       |                                | 103.01              |                         |                            |             | 103.008                | 55.4                      |                                       |                             | 55.4                               | 47.61                |                                         |                                           | 47.61                     | 3                                       | 1                    | 4                | Wang Zhengkuan   | 4              |                  |   |
| 77               | 1976 | Chen Huixing                      | poor peasant         | 2              |                                          |       |                               | 1941                   | 0                           | 1941               | 1941                        |                            |                              |                             | 1941                        | 630                             | 132                                  |                       | 762                       |                                | 71.82               |                         |                            |             | 71.817                 | 83.8                      |                                       |                             | 83.8                               | -11.98               |                                         | 2                                         | -9.98                     | 3                                       | 3                    | 4                | Wang Zhengkuan   | 4              |                  |   |
| 21s              | 1976 | Feng Zhaoqian                     | poor peasant         | 5              |                                          |       |                               | 3837                   | 359                         | 4196               | 4196                        |                            |                              |                             | 4196                        | 1575                            | 285                                  |                       | 1860                      |                                | 155.25              |                         |                            |             | 155.252                | 204.6                     |                                       |                             | 204.6                              | -49.35               |                                         | 19.3                                      | -30.05                    | 1                                       | 3                    | 4                | Wang Zhengkuan   | 4              |                  |   |
| 30s              | 1976 | Feng Zhaobin                      | poor peasant         | 3              |                                          |       |                               | 2271                   | 392                         | 2663               | 2663                        |                            |                              |                             | 2663                        | 945                             | 181                                  |                       | 1126                      |                                | 98.53               |                         |                            |             | 98.531                 | 123.9                     |                                       |                             | 123.9                              | -25.37               |                                         | 10.4                                      | -14.97                    | 2                                       | 3                    | 4                | Wang Zhengkuan   | 4              |                  |   |
| 31s              | 1976 | Feng Xianbao                      | poor peasant         | 3              |                                          |       |                               | 2550                   | 363                         | 2913               | 2913                        |                            |                              |                             | 2913                        | 945                             | 198                                  |                       | 1143                      |                                | 107.78              | 3                       |                            |             | 107.781                | 125.7                     |                                       |                             | 125.7                              | -17.92               |                                         | 4.9                                       | -13.02                    | 3                                       | 3                    | 4                | Wang Zhengkuan   | 4              |                  |   |
| 48s              | 1976 | Wang Jiaxun                       | poor peasant         | 3.58           |                                          |       |                               | 2066                   | 748                         | 2814               | 2814                        |                            |                              |                             | 2814                        | 1127.7                          | 191                                  |                       | 1318.7                    |                                | 104.12              |                         |                            |             | 104.118                | 145.1                     |                                       |                             | 145.1                              | -40.98               |                                         | 12                                        | -28.98                    | 2                                       | 3                    | 4                | Wang Zhengkuan   | 4              |                  |   |
| 1                | 1977 | Ma Zhenqi                         | middle-class peasant | 2              |                                          |       |                               | 1889                   | 71                          | 1960               | 1960                        |                            |                              |                             | 1960                        | 520                             | 104                                  |                       | 623.88                    |                                | 60.76               |                         |                            |             | 60.76                  | 62.388                    | 10                                    |                             | 72.388                             | -11.63               |                                         | 3.63                                      | -8.00                     | 1                                       | 2                    | 4                | Wang Zhengggkuan | 4              |                  |   |
| 2                | 1977 | Wang Xinming                      | middle-class peasant | 7              |                                          |       |                               | 6588                   | 1395                        | 7983               | 7983                        | 2500                       |                              |                             | 10483                       | 1820                            | 556                                  |                       | 2375.599                  |                                | 2375.599            |                         |                            |             | 247.47                 |                           |                                       | 247.473                     | 237.5599                           | 38                   |                                         | 275.5599                                  | -28.09                    |                                         | -28.09               | 1                | 2                | 4              | Wang Zhengggkuan | 4 |
| 3                | 1977 | Feng Kaiying                      | poor peasant         | 5              |                                          |       |                               | 4347                   | 1500                        | 5847               | 5847                        |                            |                              |                             | 5847                        | 1300                            | 310                                  |                       | 1609.891                  |                                | 1609.891            |                         |                            |             | 181.257                | 160.9891                  | 25.8                                  |                             | 186.7891                           | -5.53                |                                         | 0.53                                      | -5.00                     | 2                                       | 3                    | 4                | Wang Zhengkuan   | 4              |                  |   |
| 4                | 1977 | Wang Zuopeng                      | poor peasant         | 2              |                                          |       |                               | 2654                   | 289                         | 2943               | 2943                        |                            |                              |                             | 2943                        | 520                             | 156                                  |                       | 675.979                   |                                | 675.979             |                         |                            |             | 91.23                  | 67.5979                   | 10.8                                  |                             | 78.3979                            | 12.84                |                                         |                                           | 12.84                     | 1                                       | 3                    | 4                | Wang Zhengkuan   | 4              |                  |   |
| 5                | 1977 | Wang Zuoliang                     | poor peasant         | 5              |                                          |       |                               | 5414                   | 340                         | 5754               | 5754                        |                            |                              |                             | 5754                        | 1300                            | 305                                  |                       | 1604.962                  |                                | 1604.962            |                         |                            |             | 178.37                 | 160.4962                  | 25.7                                  |                             | 186.1962                           | -7.82                |                                         | 1.82                                      | -6.00                     | 1                                       | 3                    | 4                | Wang Zhengkuan   | 4              |                  |   |
| 6                | 1977 | Wang Tingmei                      | poor peasant         | 7              |                                          |       |                               | 7693                   | 474                         | 8167               | 8167                        |                            |                              |                             | 8167                        | 1820                            | 433                                  |                       | 2252.851                  |                                | 2252.851            |                         |                            |             | 253.177                | 225.2851                  | 36                                    |                             | 261.2851                           | -8.11                |                                         | 1.61                                      | -6.50                     | 1                                       | 3                    | 4                | Wang Zhengkuan   | 4              |                  |   |
| 7                | 1977 | Wang Tingxi                       | poor peasant         | 4              | worker families of revolutionary martyrs |       |                               | 1333                   | 159                         | 1492               | 1492                        | 3300                       |                              |                             | 4792                        | 1040                            | 254                                  |                       | 1293.976                  |                                | 1293.976            |                         |                            |             | 24.3                   | 70.552                    | 129.3976                              | 20.7                        |                                    | 150.0976             | -79.55                                  |                                           |                           | -79.55                                  | 1                    | 3                | 4                | Wang Zhengkuan | 4                |   |
| 8                | 1977 | Tingxi's Mother                   | poor peasant         | 1              |                                          |       |                               | 0                      |                             | 0                  | 1350                        |                            |                              | 1350                        | 1350                        | 260                             | 72                                   |                       | 331.55                    |                                | 331.55              |                         |                            |             | 41.85                  | 33.155                    | 5.3                                   |                             | 38.455                             | 3.40                 |                                         |                                           | 3.40                      | 1                                       | 3                    | 4                | Wang Zhengkuan   | 4              |                  |   |
| 9                | 1977 | Wang Tingzhi                      | poor peasant         | 1              |                                          |       |                               | 1149                   | 196                         | 1345               | 1345                        |                            |                              |                             | 1345                        | 260                             | 71                                   |                       | 331.285                   |                                | 331.285             |                         |                            |             | 41.695                 | 33.1285                   | 5.3                                   |                             | 38.4285                            | 3.27                 |                                         |                                           | 3.27                      | 2                                       | 3                    | 4                | Wang Zhengkuan   | 4              |                  |   |
| 10               | 1977 | Wang Zuoxing                      | poor peasant         | 5              |                                          |       |                               | 3783                   | 288                         | 4071               | 4071                        |                            |                              |                             | 4071                        | 1300                            | 216                                  |                       | 1515.763                  |                                | 1515.763            |                         |                            |             | 126.201                | 151.5763                  | 24.3                                  |                             | 175.8763                           | -49.68               |                                         | 15.68                                     | -34.00                    | 2                                       | 3                    | 4                | Wang Zhengkuan   | 4              |                  |   |

(cont.)

| Household number | Year | Name of the head of the household | Family class status  | Family members | Family characters | Labor | Number of standard population | Work points settlement |                             |                    |                     |                    | Grain distribution  |                    |                             |                                 |                                      | Firewood distribution | Work points income (Yuan) |                                |                     |                         | Deducted amount (Yuan)    |             |                        |                           |                                       | Distribution results (Yuan) | Distribution results (Yuan)        |                      |                                         | Guanxi                                    |                           |                                         |                      |                  |                |                |
|------------------|------|-----------------------------------|----------------------|----------------|-------------------|-------|-------------------------------|------------------------|-----------------------------|--------------------|---------------------|--------------------|---------------------|--------------------|-----------------------------|---------------------------------|--------------------------------------|-----------------------|---------------------------|--------------------------------|---------------------|-------------------------|---------------------------|-------------|------------------------|---------------------------|---------------------------------------|-----------------------------|------------------------------------|----------------------|-----------------------------------------|-------------------------------------------|---------------------------|-----------------------------------------|----------------------|------------------|----------------|----------------|
|                  |      |                                   |                      |                |                   |       |                               | Laboring work points   | Farmyard manure work points | Sum of work points | subsidy work points | Sum of work points | Subsidy work points | Sum of work points | Grain distribution: rations | Grain distribution: work points | Grain distribution: subsidized grain |                       | Grain distribution: sum   | Grain distribution: per capita | Income: work points | Income: welfare subsidy | Income: prepaid overdraft | Income: sum | Deducted amount: grain | Deducted amount: firewood | Deducted amount: other things in kind |                             | Deducted amount: withdraw advances | Deducted amount: sum | Distribution results: personal solution | Distribution results: collective solution | Distribution results: sum | Interpersonal relationship with leaders | Family class status2 | Number of leader | Name of leader | Term of office |
|                  |      |                                   |                      |                |                   |       |                               |                        |                             |                    |                     |                    |                     |                    |                             |                                 |                                      |                       |                           |                                |                     |                         |                           |             |                        |                           |                                       |                             |                                    |                      |                                         |                                           |                           |                                         |                      |                  |                |                |
| 11               | 1977 | Wang Zuoqi                        | poor peasant         | 5              |                   |       |                               | 4836                   | 524                         | 5360               |                     | 5360               |                     | 5360               | 1300                        | 284                             |                                      | 1584.08               |                           | 1584.08                        | 166.16              |                         | 166.16                    | 158.408     | 25.3                   |                           | 183.708                               | -17.55                      |                                    | 3.55                 | -14.00                                  | 2                                         | 3                         | 4                                       | Wang Zhengkuan       | 4                |                |                |
| 12               | 1977 | Kaiying's mother                  | poor peasant         | 1              |                   |       |                               | 1261                   | 0                           | 1261               |                     | 1261               |                     | 1261               | 260                         | 67                              |                                      | 326.833               |                           | 326.833                        | 39.09               |                         | 39.091                    | 32.6833     | 5.2                    |                           | 37.8833                               | 1.21                        |                                    |                      | 1.21                                    | 2                                         | 3                         | 4                                       | Wang Zhengkuan       | 4                |                |                |
| 14               | 1977 | Feng Kailing                      | landlord             | 2              |                   |       |                               | 2768                   | 107                         | 2875               |                     | 2875               |                     | 2875               | 520                         | 152                             |                                      | 672.375               |                           | 672.375                        | 89.13               |                         | 89.125                    | 67.2375     | 10.8                   |                           | 78.0375                               | 11.09                       |                                    |                      | 11.09                                   | 3                                         | 1                         | 4                                       | Wang Zhengkuan       | 4                |                |                |
| 15               | 1977 | Feng Huazhong                     | landlord             | 4.47           |                   |       |                               | 5851                   | 638                         | 6489               |                     | 6489               |                     | 6489               | 1162.2                      | 344                             |                                      | 1506.117              |                           | 1506.117                       | 201.16              |                         | 201.159                   | 150.6117    | 24.1                   |                           | 174.7117                              | 26.45                       |                                    |                      | 26.45                                   | 3                                         | 1                         | 4                                       | Wang Zhengkuan       | 4                |                |                |
| 16               | 1977 | Wang Zuozhen                      | poor peasant         | 4              |                   |       |                               | 3244                   | 12                          | 3256               |                     | 3256               |                     | 3256               | 1040                        | 173                             |                                      | 1212.568              |                           | 1212.568                       | 100.94              |                         | 100.936                   | 121.2568    | 19.4                   |                           | 140.6568                              | -39.72                      |                                    | 9.72                 | -30.00                                  | 2                                         | 3                         | 4                                       | Wang Zhengkuan       | 4                |                |                |
| 17               | 1977 | Chen Xuezhong                     | poor peasant         | 2              |                   |       |                               | 2528                   | 29                          | 2557               |                     | 2557               |                     | 2557               | 520                         | 136                             |                                      | 655.521               |                           | 655.521                        | 79.27               |                         | 79.267                    | 65.5521     | 10.5                   |                           | 76.0521                               | 3.21                        |                                    |                      | 3.21                                    | 1                                         | 3                         | 4                                       | Wang Zhengkuan       | 4                |                |                |
| 18               | 1977 | Feng Baojin                       | poor peasant         | 3              |                   |       |                               | 3740                   | 279                         | 4019               |                     | 4019               |                     | 4019               | 780                         | 213                             |                                      | 993.007               |                           | 993.007                        | 124.59              |                         | 124.589                   | 99.3007     | 15.9                   |                           | 115.2007                              | 9.39                        |                                    |                      | 9.39                                    | 1                                         | 3                         | 4                                       | Wang Zhengkuan       | 4                |                |                |
| 19               | 1977 | Feng Xianzhong                    | poor peasant         | 4              |                   |       |                               | 2734                   | 448                         | 3182               |                     | 3182               |                     | 3182               | 1040                        | 169                             |                                      | 1208.646              |                           | 1208.646                       | 98.64               |                         | 98.642                    | 120.8646    | 19.3                   |                           | 140.1646                              | -41.52                      |                                    | 7.52                 | -34.00                                  | 3                                         | 3                         | 4                                       | Wang Zhengkuan       | 4                |                |                |
| 20               | 1977 | Feng Kaiyuan                      | poor peasant         | 7              |                   |       |                               | 6408                   | 1190                        | 7598               |                     | 7598               |                     | 7598               | 1820                        | 403                             |                                      | 2222.694              |                           | 2222.694                       | 235.54              |                         | 235.538                   | 222.2694    | 35.6                   |                           | 257.8694                              | -22.33                      |                                    | 6.33                 | -16.00                                  | 2                                         | 3                         | 4                                       | Wang Zhengkuan       | 4                |                |                |
| 21               | 1977 | Feng Kaiwu                        | poor peasant         | 4              |                   |       |                               | 6623                   | 350                         | 6973               |                     | 6973               |                     | 6973               | 1040                        | 370                             |                                      | 1409.569              |                           | 1409.569                       | 216.16              |                         | 216.163                   | 140.9569    | 22.6                   |                           | 163.5569                              | 52.61                       |                                    |                      | 52.61                                   | 2                                         | 3                         | 4                                       | Wang Zhengkuan       | 4                |                |                |
| 22               | 1977 | Feng Kaiwen                       | poor peasant         | 7              |                   |       |                               | 7970                   | 621                         | 8591               |                     | 8591               |                     | 8591               | 1820                        | 455                             |                                      | 2275.323              |                           | 2275.323                       | 266.32              |                         | 266.321                   | 227.5323    | 36.4                   |                           | 263.9323                              | 2.39                        |                                    |                      | 2.39                                    | 1                                         | 3                         | 4                                       | Wang Zhengkuan       | 4                |                |                |
| 23               | 1977 | Kou Huaisheng                     | poor peasant         | 8              |                   |       |                               | 9302                   | 391                         | 9693               |                     | 9693               |                     | 9693               | 2080                        | 514                             |                                      | 2593.729              |                           | 2593.729                       | 300.48              |                         | 300.483                   | 259.3729    | 41.5                   |                           | 300.8729                              | -0.39                       |                                    | 0.39                 | 0.00                                    | 1                                         | 3                         | 4                                       | Wang Zhengkuan       | 4                |                |                |
| 24               | 1977 | Anming's mother                   | landlord             | 1              |                   |       |                               | 906                    | 105                         | 1011               |                     | 1011               |                     | 1011               | 260                         | 54                              |                                      | 313.583               |                           | 313.583                        | 31.34               |                         | 31.341                    | 31.3583     | 5                      |                           | 36.3583                               | -5.02                       |                                    |                      | -5.02                                   | 2                                         | 1                         | 4                                       | Wang Zhengkuan       | 4                |                |                |
| 25               | 1977 | Wang Xiujuan                      | poor peasant         | 2              |                   |       |                               | 2316                   | 136                         | 2452               |                     | 2452               |                     | 2452               | 520                         | 130                             |                                      | 649.956               |                           | 649.956                        | 76.01               |                         | 76.012                    | 64.9956     | 10.4                   |                           | 75.3956                               | 0.62                        |                                    |                      | 0.62                                    | 2                                         | 3                         | 4                                       | Wang Zhengkuan       | 4                |                |                |
| 26               | 1977 | Feng Zhaobu                       | middle-class peasant | 4              | worker            |       |                               | 2825                   | 20                          | 2845               |                     | 2845               | 1800                | 4645               | 1040                        | 246                             |                                      | 1286.185              |                           | 1286.185                       | 88.20               |                         | 12.2                      | 100.395     | 128.6185               | 28.6                      |                                       | 157.2185                    | -56.82                             |                      |                                         | -56.82                                    | 1                         | 2                                       | 4                    | Wang Zhengkuan   | 4              |                |
| 27               | 1977 | Feng Zhaohuan                     | middle-class peasant | 6              |                   |       |                               | 4319                   | 543                         | 4862               |                     | 4862               |                     | 4862               | 1560                        | 258                             |                                      | 1817.686              |                           | 1817.686                       | 150.72              |                         | 150.722                   | 181.7686    | 29.1                   |                           | 210.8686                              | -60.15                      |                                    | 12.15                | -48.00                                  | 2                                         | 2                         | 4                                       | Wang Zhengkuan       | 4                |                |                |
| 28               | 1977 | Zhaohuan's mother                 | middle-class peasant | 1              |                   |       |                               | 1261                   | 0                           | 1261               |                     | 1261               |                     | 1261               | 260                         | 67                              |                                      | 326.833               |                           | 326.833                        | 39.09               |                         | 39.091                    | 32.6833     | 5.2                    |                           | 37.8833                               | 1.21                        |                                    |                      | 1.21                                    | 2                                         | 2                         | 4                                       | Wang Zhengkuan       | 4                |                |                |
| 29               | 1977 | Feng Kaijun                       | poor peasant         | 8              |                   |       |                               | 8797                   | 466                         | 9263               |                     | 9263               |                     | 9263               | 2080                        | 491                             |                                      | 2570.939              |                           | 2570.939                       | 287.15              |                         | 287.153                   | 257.0939    | 41.1                   |                           | 298.1939                              | -11.04                      |                                    | 2.04                 | -9.00                                   | 2                                         | 3                         | 4                                       | Wang Zhengkuan       | 4                |                |                |
| 30               | 1977 | Feng Kaizheng                     | poor peasant         | 8              |                   |       |                               | 9441                   | 976                         | 10417              |                     | 10417              |                     | 10417              | 2080                        | 552                             |                                      | 2632.101              |                           | 2632.101                       | 322.93              |                         | 322.927                   | 263.2101    | 42.1                   |                           | 305.3101                              | 17.62                       |                                    |                      | 17.62                                   | 2                                         | 3                         | 4                                       | Wang Zhengkuan       | 4                |                |                |
| 31               | 1977 | Feng Zhaoxin                      | poor peasant         | 6              |                   |       |                               | 7673                   | 269                         | 7942               |                     | 7942               |                     | 7942               | 1560                        | 421                             |                                      | 1980.926              |                           | 1980.926                       | 246.20              |                         | 246.202                   | 198.0926    | 31.7                   |                           | 229.7926                              | 16.41                       |                                    |                      | 16.41                                   | 3                                         | 3                         | 4                                       | Wang Zhengkuan       | 4                |                |                |
| 32               | 1977 | Wang Xiangyun                     | middle-class peasant | 5              |                   |       |                               | 4976                   | 221                         | 5197               |                     | 5197               |                     | 5197               | 1300                        | 275                             |                                      | 1575.441              |                           | 1575.441                       | 161.11              |                         | 161.107                   | 157.5441    | 25.2                   |                           | 182.7441                              | -21.64                      |                                    | 3.64                 | -18.00                                  | 3                                         | 2                         | 4                                       | Wang Zhengkuan       | 4                |                |                |
| 33               | 1977 | Wang Xuewen                       | middle-class peasant | 3              |                   |       |                               | 4572                   | 205                         | 4777               |                     | 4777               |                     | 4777               | 780                         | 253                             |                                      | 1033.181              |                           | 1033.181                       | 148.09              |                         | 148.087                   | 103.3181    | 16.5                   |                           | 119.8181                              | 28.27                       |                                    |                      | 28.27                                   | 2                                         | 2                         | 4                                       | Wang Zhengkuan       | 4                |                |                |
| 34               | 1977 | Feng Xianmin                      | middle-class peasant | 3              |                   |       |                               | 4726                   | 371                         | 5097               |                     | 5097               |                     | 5097               | 780                         | 270                             |                                      | 1050.141              |                           | 1050.141                       | 158.01              |                         | 158.007                   | 105.0141    | 16.8                   |                           | 121.8141                              | 36.19                       |                                    |                      | 36.19                                   | 2                                         | 2                         | 4                                       | Wang Zhengkuan       | 4                |                |                |
| 35               | 1977 | Feng Xianhua                      | middle-class peasant | 2              |                   |       |                               | 2685                   | 340                         | 3025               |                     | 3025               |                     | 3025               | 520                         | 160                             |                                      | 680.325               |                           | 680.325                        | 93.78               |                         | 93.775                    | 68.0325     | 10.9                   |                           | 78.9325                               | 14.84                       |                                    |                      | 14.84                                   | 2                                         | 2                         | 4                                       | Wang Zhengkuan       | 4                |                |                |

(cont.)

| Household number | Year | Name of the head of the household | Family class status  | Family members | Family characters | Labor | Number of standard population | Work points settlement |                             |                    |                             |                            | Grain distribution           |                             |                             |                                 |                                      | Firewood distribution   | Work points income (Yuan)      |                     |                         |                            | Deducted amount (Yuan) |                        |                           |                                       |                                    | Distribution results (Yuan) | Distribution results (Yuan)             |                                           |                           | Guanxi                                  |                      |                  |                |                |
|------------------|------|-----------------------------------|----------------------|----------------|-------------------|-------|-------------------------------|------------------------|-----------------------------|--------------------|-----------------------------|----------------------------|------------------------------|-----------------------------|-----------------------------|---------------------------------|--------------------------------------|-------------------------|--------------------------------|---------------------|-------------------------|----------------------------|------------------------|------------------------|---------------------------|---------------------------------------|------------------------------------|-----------------------------|-----------------------------------------|-------------------------------------------|---------------------------|-----------------------------------------|----------------------|------------------|----------------|----------------|
|                  |      |                                   |                      |                |                   |       |                               | Laboring work points   | Farmyard manure work points | Sum of work points | subsidy work points by cash | Sum of work points by cash | Subsidy work points by grain | Sum of work points by grain | Grain distribution: rations | Grain distribution: work points | Grain distribution: subsidized grain | Grain distribution: sum | Grain distribution: per capita | Income: work points | Income: welfare subsidy | Income: prepaied overdraft | Income: sum            | Deducted amount: grain | Deducted amount: firewood | Deducted amount: other things in kind | Deducted amount: withdraw advances | Deducted amount: sum        | Distribution results: personal solution | Distribution results: collective solution | Distribution results: sum | Interpersonal relationship with leaders | Family class status2 | Number of leader | Name of leader | Term of office |
| 36               | 1977 | Feng Xiaoxi                       | middle-class peasant | 5              |                   |       |                               | 6608                   | 347                         | 6955               |                             | 6955                       |                              | 6955                        | 1300                        | 369                             |                                      | 1668.615                |                                |                     |                         |                            | 215.605                | 166.8615               | 26.7                      |                                       | 193.5615                           | 22.04                       |                                         |                                           | 22.04                     | 1                                       | 2                    | 4                | Wang Zhengkuan | 4              |
| 37               | 1977 | Feng Xiangui                      | middle-class peasant | 7              |                   |       |                               | 5653                   | 683                         | 6336               |                             | 6336                       |                              | 6336                        | 1820                        | 336                             |                                      | 2155.808                |                                |                     |                         |                            | 196.416                | 215.5808               | 34.5                      |                                       | 250.0808                           | -53.66                      |                                         | 16.66                                     | -37.00                    | 2                                       | 2                    | 4                | Wang Zhengkuan | 4              |
| 38               | 1977 | Feng Xianzhen                     | middle-class peasant | 5              |                   |       |                               | 9438                   | 465                         | 9903               |                             | 9903                       |                              | 9903                        | 1300                        | 525                             |                                      | 1824.859                |                                |                     |                         |                            | 306.993                | 182.4859               | 29.2                      |                                       | 211.6859                           | 95.31                       |                                         |                                           | 95.31                     | 2                                       | 2                    | 4                | Wang Zhengkuan | 4              |
| 39               | 1977 | Feng Xianxue                      | middle-class peasant | 5              |                   |       |                               | 4497                   | 390                         | 4887               | 300                         | 5187                       |                              | 5187                        | 1300                        | 275                             |                                      | 1574.911                |                                |                     |                         |                            | 160.797                | 157.4911               | 25.2                      |                                       | 182.6911                           | -21.89                      |                                         | 5.89                                      | -16.00                    | 1                                       | 2                    | 4                | Wang Zhengkuan | 4              |
| 40               | 1977 | Wang Tingpin                      | poor peasant         | 2              |                   |       |                               | 2917                   | 334                         | 3251               |                             | 3251                       |                              | 3251                        | 520                         | 172                             |                                      | 692.303                 |                                |                     |                         |                            | 100.781                | 69.2303                | 11.1                      |                                       | 80.3303                            | 20.45                       |                                         |                                           | 20.45                     | 1                                       | 3                    | 4                | Wang Zhengkuan | 4              |
| 41               | 1977 | Wang Zhengfen                     | middle-class peasant | 2              |                   |       |                               | 3276                   | 100                         | 3376               |                             | 3376                       |                              | 3376                        | 520                         | 179                             |                                      | 698.928                 |                                |                     |                         |                            | 104.656                | 69.8928                | 11.2                      |                                       | 81.0928                            | 23.56                       |                                         |                                           | 23.56                     | 2                                       | 2                    | 4                | Wang Zhengkuan | 4              |
| 42               | 1977 | Wu Zongxiu                        | middle-class peasant | 1              |                   |       |                               | 2327                   | 5                           | 2332               |                             | 2332                       |                              | 2332                        | 260                         | 124                             |                                      | 383.596                 |                                |                     |                         |                            | 72.292                 | 38.3596                | 6.1                       |                                       | 44.4596                            | 27.83                       |                                         |                                           | 27.83                     | 3                                       | 2                    | 4                | Wang Zhengkuan | 4              |
| 43               | 1977 | Wang Depo                         | poor peasant         | 6              |                   |       |                               | 5167                   | 364                         | 5531               |                             | 5531                       |                              | 5531                        | 1560                        | 293                             |                                      | 1853.143                |                                |                     |                         |                            | 171.461                | 185.3143               | 29.6                      |                                       | 214.9143                           | -43.45                      |                                         | 13.45                                     | -30.00                    | 2                                       | 3                    | 4                | Wang Zhengkuan | 4              |
| 44               | 1977 | Wang Dexue                        | poor peasant         | 2              |                   |       |                               | 2860                   | 0                           | 2860               |                             | 2860                       |                              | 2860                        | 520                         | 152                             |                                      | 671.58                  |                                |                     |                         |                            | 88.66                  | 67.158                 | 10.8                      |                                       | 77.958                             | 10.70                       |                                         |                                           | 10.70                     | 1                                       | 3                    | 4                | Wang Zhengkuan | 4              |
| 45               | 1977 | Wang Dekuan                       | poor peasant         | 3              |                   |       |                               | 3196                   | 194                         | 3390               |                             | 3390                       |                              | 3390                        | 780                         | 180                             |                                      | 959.67                  |                                |                     |                         |                            | 105.09                 | 95.967                 | 15.4                      |                                       | 111.367                            | -6.28                       |                                         | 1.28                                      | -5.00                     | 1                                       | 3                    | 4                | Wang Zhengkuan | 4              |
| 46               | 1977 | Wang Tingzhen                     | poor peasant         | 7              | handicapped       |       |                               | 4196                   | 265                         | 4461               | 4000                        | 8461                       |                              | 8461                        | 1820                        | 448                             |                                      | 2268.433                |                                |                     |                         |                            | 262.291                | 226.8433               | 36.3                      |                                       | 263.1433                           | -0.85                       |                                         |                                           | -0.85                     | 1                                       | 3                    | 4                | Wang Zhengkuan | 4              |
| 47               | 1977 | Wang Tingjian                     | poor peasant         | 9              |                   |       |                               | 14261                  | 422                         | 14683              |                             | 14683                      |                              | 14683                       | 2340                        | 778                             |                                      | 3118.199                |                                |                     |                         |                            | 455.173                | 311.8199               | 49.9                      |                                       | 361.7199                           | 93.45                       |                                         |                                           | 93.45                     | 1                                       | 3                    | 4                | Wang Zhengkuan | 4              |
| 48               | 1977 | Wang Zhengcai                     | poor peasant         | 6              |                   |       |                               | 8250                   | 428                         | 8678               |                             | 8678                       |                              | 8678                        | 1560                        | 460                             |                                      | 2019.934                |                                |                     |                         |                            | 269.018                | 201.9934               | 32.3                      |                                       | 234.2934                           | 34.72                       |                                         |                                           | 34.72                     | 1                                       | 3                    | 4                | Wang Zhengkuan | 4              |
| 49               | 1977 | Wang Zhengxuan                    | poor peasant         | 4              | soldier           |       |                               | 2930                   | 127                         | 3057               | 2000                        | 5057                       |                              | 5057                        | 1040                        | 268                             |                                      | 1308.021                |                                |                     |                         |                            | 156.767                | 130.8021               | 20.9                      |                                       | 151.7021                           | 5.06                        |                                         |                                           | 5.06                      | 1                                       | 3                    | 4                | Wang Zhengkuan | 4              |
| 50               | 1977 | Chao Shengqi                      | poor peasant         | 2              | worker            |       |                               | 1237                   | 232                         | 1469               |                             | 1469                       | 1000                         | 2469                        | 520                         | 131                             |                                      | 650.857                 |                                |                     |                         |                            | 45.539                 | 65.0857                | 10.4                      |                                       | 75.4857                            | -29.95                      |                                         |                                           | -29.95                    | 2                                       | 3                    | 4                | Wang Zhengkuan | 4              |
| 51               | 1977 | Chao Shengyu                      | poor peasant         | 2              | worker            |       |                               | 863                    | 85                          | 948                |                             | 948                        | 1400                         | 2348                        | 520                         | 124                             |                                      | 644.444                 |                                |                     |                         |                            | 29.388                 | 64.4444                | 10.3                      |                                       | 74.7444                            | -45.36                      |                                         |                                           | -45.36                    | 2                                       | 3                    | 4                | Wang Zhengkuan | 4              |
| 52               | 1977 | Wang Zhengyan                     | poor peasant         | 2              |                   |       |                               | 4581                   | 183                         | 4764               |                             | 4764                       |                              | 4764                        | 520                         | 252                             |                                      | 772.492                 |                                |                     |                         |                            | 147.684                | 77.2492                | 12.4                      |                                       | 89.6492                            | 58.03                       |                                         |                                           | 58.03                     | 1                                       | 3                    | 4                | Wang Zhengkuan | 4              |
| 53               | 1977 | Wang Zhengkuan                    | poor peasant         |                |                   |       |                               | 970                    | 0                           | 970                |                             | 970                        |                              | 970                         | 0                           | 51                              |                                      | 51.41                   |                                |                     |                         |                            | 30.07                  | 5.141                  | 0.8                       |                                       | 5.941                              | 24.13                       |                                         |                                           | 24.13                     | 1                                       | 3                    | 4                | Wang Zhengkuan | 4              |
| 54               | 1977 | Wang Zhenggui                     | poor peasant         | 5              |                   |       |                               | 6295                   | 951                         | 7246               |                             | 7246                       |                              | 7246                        | 1300                        | 384                             |                                      | 1684.038                |                                |                     |                         |                            | 224.626                | 168.4038               | 26.9                      |                                       | 195.3038                           | 29.32                       |                                         |                                           | 29.32                     | 1                                       | 3                    | 4                | Wang Zhengkuan | 4              |
| 56               | 1977 | Wang Deshan                       | poor peasant         | 5.5            |                   |       |                               | 4695                   | 605                         | 5300               |                             | 5300                       |                              | 5300                        | 1430                        | 281                             |                                      | 1710.9                  |                                |                     |                         |                            | 164.3                  | 171.09                 | 27.4                      |                                       | 198.49                             | -34.19                      |                                         | 7.19                                      | -27.00                    | 2                                       | 3                    | 4                | Wang Zhengkuan | 4              |
| 57               | 1977 | Wang Deling                       | poor peasant         | 6.5            |                   |       |                               | 4102                   | 173                         | 4275               |                             | 4275                       |                              | 4275                        | 1690                        | 227                             |                                      | 1916.575                |                                |                     |                         |                            | 132.525                | 191.6575               | 30.7                      |                                       | 222.3575                           | -89.83                      |                                         | 24.83                                     | -65.00                    | 2                                       | 3                    | 4                | Wang Zhengkuan | 4              |
| 60               | 1977 | Feng Zhaoyuan                     | poor peasant         | 1              |                   |       |                               | 2134                   | 0                           | 2134               |                             | 2134                       |                              | 2134                        | 260                         | 113                             |                                      | 373.102                 |                                |                     |                         |                            | 66.154                 | 37.3102                | 6                         |                                       | 43.3102                            | 22.84                       |                                         |                                           | 22.84                     | 2                                       | 3                    | 4                | Wang Zhengkuan | 4              |
| 61               | 1977 | Ge Zhengxian                      | poor peasant         | 1              |                   |       |                               | 2134                   | 0                           | 2134               |                             | 2134                       |                              | 2134                        | 260                         | 113                             |                                      | 373.102                 |                                |                     |                         |                            | 66.154                 | 37.3102                | 6                         |                                       | 43.3102                            | 22.84                       |                                         |                                           | 22.84                     | 3                                       | 3                    | 4                | Wang Zhengkuan | 4              |
| 62               | 1977 | Niu Aiqin                         | educated youth       | 1              | educated youth    |       |                               | 388                    | 0                           | 388                |                             | 388                        |                              | 388                         | 0                           | 21                              |                                      | 20.564                  |                                |                     |                         |                            | 12.028                 | 2.0564                 |                           |                                       | 2.0564                             | 9.97                        |                                         |                                           | 9.97                      | 1                                       | 4                    | 4                | Wang Zhengkuan | 4              |



(cont.)

| Household number | Year | Name of the head of the household | Family class status  | Family members | Family characters | Labor | Number of standard population | Work points settlement |                             |                    |                             | Grain distribution         |                              |                             |                             |                                 | Firewood distribution | Work points income (Yuan)            |                         |                                |                     | Deducted amount (Yuan)  |                           |             |                        |                           | Distribution results (Yuan) | Distribution results (Yuan)           |                                    |                      | Guanxi                                  |                                           |                           |                                         |                                  |                  |                |
|------------------|------|-----------------------------------|----------------------|----------------|-------------------|-------|-------------------------------|------------------------|-----------------------------|--------------------|-----------------------------|----------------------------|------------------------------|-----------------------------|-----------------------------|---------------------------------|-----------------------|--------------------------------------|-------------------------|--------------------------------|---------------------|-------------------------|---------------------------|-------------|------------------------|---------------------------|-----------------------------|---------------------------------------|------------------------------------|----------------------|-----------------------------------------|-------------------------------------------|---------------------------|-----------------------------------------|----------------------------------|------------------|----------------|
|                  |      |                                   |                      |                |                   |       |                               | Laboring work points   | Farmyard manure work points | Sum of work points | subsidy work points by cash | Sum of work points by cash | Subsidy work points by grain | Sum of work points by grain | Grain distribution: rations | Grain distribution: work points |                       | Grain distribution: subsidized grain | Grain distribution: sum | Grain distribution: per capita | Income: work points | Income: welfare subsidy | Income: prepaid overdraft | Income: sum | Deducted amount: grain | Deducted amount: firewood |                             | Deducted amount: other things in kind | Deducted amount: withdraw advances | Deducted amount: sum | Distribution results: personal solution | Distribution results: collective solution | Distribution results: sum | Interpersonal relationship with leaders | Family class status <sup>2</sup> | Number of leader | Name of leader |
| 65               | 1977 | Ge Huihui                         | educated youth       | 1              | educated youth    |       |                               | 2522                   | 0                           | 2522               |                             | 2522                       |                              | 2522                        | 260                         | 134                             |                       | 393.666                              |                         | 393.666                        | 78.18               |                         | 78.182                    | 39.3666     | 6.3                    |                           | 45.6666                     | 32.52                                 |                                    |                      | 32.52                                   | 1                                         | 4                         | 4                                       | Wang Zhengkuan                   | 4                |                |
| 68               | 1977 | Ma Lianjun                        | middle-class peasant | 10             |                   |       |                               | 10703                  | 1103                        | 11806              |                             | 11806                      |                              | 11806                       | 2600                        | 626                             |                       | 3225.718                             |                         | 3225.718                       | 365.99              |                         | 365.986                   | 322.5718    | 51.6                   |                           | 374.1718                    | -8.19                                 |                                    | 1.69                 | -6.50                                   | 2                                         | 2                         | 4                                       | Wang Zhengkuan                   | 4                |                |
| 69               | 1977 | Feng Xiaolou                      | landlord             | 1              |                   |       |                               | 2282                   | 0                           | 2282               |                             | 2282                       |                              | 2282                        | 260                         | 121                             |                       | 380.946                              |                         | 380.946                        | 70.74               |                         | 70.742                    | 38.0946     | 6.1                    |                           | 44.1946                     | 26.55                                 |                                    |                      | 26.55                                   | 3                                         | 1                         | 4                                       | Wang Zhengkuan                   | 4                |                |
| 77               | 1977 | Chen Huixing                      | poor peasant         | 2              |                   |       |                               | 3277                   | 18                          | 3295               |                             | 3295                       |                              | 3295                        | 520                         | 175                             |                       | 694.635                              |                         | 694.635                        | 102.15              |                         | 102.145                   | 69.4635     | 11.1                   |                           | 80.5635                     | 21.58                                 |                                    |                      | 21.58                                   | 3                                         | 3                         | 4                                       | Wang Zhengkuan                   | 4                |                |
| 87               | 1977 | Wang Changhan                     | poor peasant         | 1              |                   |       |                               | 2571                   | 0                           | 2571               | 200                         | 2771                       |                              | 2771                        | 260                         | 147                             |                       | 406.863                              |                         | 406.863                        | 85.90               |                         | 85.901                    | 40.6863     | 6.3                    |                           | 46.9863                     | 38.91                                 |                                    |                      | 38.91                                   | 1                                         | 3                         | 4                                       | Wang Zhengkuan                   | 4                |                |
| 21s              | 1977 | Feng Zhaoqian                     | poor peasant         | 5              |                   |       |                               | 3440                   | 377                         | 3817               |                             | 3817                       |                              | 3817                        | 1300                        | 202                             |                       | 1502.301                             |                         | 1502.301                       | 118.33              |                         | 118.327                   | 150.2301    | 24                     |                           | 174.2301                    | -55.90                                |                                    | 14.9                 | -41.00                                  | 1                                         | 3                         | 4                                       | Wang Zhengkuan                   | 4                |                |
| 30s              | 1977 | Feng Zhaobin                      | poor peasant         | 2.43           |                   |       |                               | 2956                   | 415                         | 3371               |                             | 3371                       |                              | 3371                        | 631.8                       | 179                             |                       | 810.463                              |                         | 810.463                        | 104.50              |                         | 104.501                   | 81.0463     | 13                     |                           | 94.0463                     | 10.45                                 |                                    |                      | 10.45                                   | 2                                         | 3                         | 4                                       | Wang Zhengkuan                   | 4                |                |
| 31s              | 1977 | Feng Xianbao                      | poor peasant         | 4              |                   |       |                               | 2562                   | 369                         | 2931               |                             | 2931                       |                              | 2931                        | 1040                        | 155                             |                       | 1195.343                             |                         | 1195.343                       | 90.86               |                         | 90.861                    | 119.5343    | 19.1                   |                           | 138.6343                    | -47.77                                |                                    | 9.77                 | -38.00                                  | 3                                         | 3                         | 4                                       | Wang Zhengkuan                   | 4                |                |
| 32s1             | 1977 | Wang Like                         | middle-class peasant | 2.57           |                   |       |                               | 1938                   | 90                          | 2028               |                             | 2028                       |                              | 2028                        | 668.2                       | 107                             |                       | 775.684                              |                         | 775.684                        | 62.87               |                         | 62.868                    | 77.5684     | 12.4                   |                           | 89.9684                     | -27.10                                |                                    | 5.1                  | -22.00                                  | 2                                         | 2                         | 4                                       | Wang Zhengkuan                   | 4                |                |
| 48s              | 1977 | Wang Jiaxun                       | poor peasant         | 4              |                   |       |                               | 4005                   | 512                         | 4517               |                             | 4517                       |                              | 4517                        | 1040                        | 239                             |                       | 1279.401                             |                         | 1279.401                       | 140.03              |                         | 140.027                   | 127.9401    | 20.5                   |                           | 148.4401                    | -8.41                                 |                                    | 1.91                 | -6.50                                   | 2                                         | 3                         | 4                                       | Wang Zhengkuan                   | 4                |                |
| 1                | 1978 | Ma Zhenqi                         | middle-class peasant | 2              |                   |       |                               | 197                    | 98                          | 295                |                             | 295                        |                              | 295                         | 640                         | 17                              |                       | 656.52                               |                         |                                | 10.62               |                         | 7                         | 17.62       | 72.3                   | 9.9                       | 3                           | 85.2                                  | -67.58                             |                      |                                         |                                           | 1                         | 2                                       | 4                                | Wang Zhenggkuan  | 4              |
| 2                | 1978 | Wang Xinming                      | middle-class peasant | 7              |                   |       |                               | 8207                   | 1116                        | 9323               |                             | 9323                       | 2800                         | 12123                       | 2240                        | 679                             |                       | 2918.888                             |                         |                                | 335.63              |                         | 6.9                       | 342.528     | 321.1                  | 43.8                      | 10.5                        | 375.4                                 | -32.87                             |                      |                                         |                                           | 1                         | 2                                       | 4                                | Wang Zhenggkuan  | 4              |
| 3                | 1978 | Feng Kaiying                      | poor peasant         | 6.4            |                   |       |                               | 6128                   | 836                         | 6964               |                             | 6964                       |                              | 6964                        | 2048                        | 390                             |                       | 2437.984                             |                         |                                | 250.70              |                         | 250.704                   | 268.2       | 36.6                   | 10.5                      | 315.3                       | -64.60                                |                                    |                      |                                         | 2                                         | 3                         | 4                                       | Wang Zhengkuan                   | 4                |                |
| 4                | 1978 | Wang Zuopeng                      | poor peasant         | 2              |                   |       |                               | 3014                   | 221                         | 3235               |                             | 3235                       |                              | 3235                        | 640                         | 181                             | -95                   | 726.16                               |                         |                                | 116.46              |                         | 116.46                    | 79.9        | 10.9                   | 3                         | 93.8                        | 22.66                                 |                                    |                      |                                         | 1                                         | 3                         | 4                                       | Wang Zhengkuan                   | 4                |                |
| 5                | 1978 | Wang Zuoliang                     | poor peasant         | 5              |                   |       |                               | 6649                   | 861                         | 7510               |                             | 7510                       |                              | 7510                        | 1600                        | 421                             |                       | 2020.56                              |                         |                                | 270.36              |                         | 270.36                    | 222.3       | 30.3                   | 7.5                       | 260.1                       | 10.26                                 |                                    |                      |                                         | 1                                         | 3                         | 4                                       | Wang Zhengkuan                   | 4                |                |
| 6                | 1978 | Wang Tingmei                      | poor peasant         | 7              |                   |       |                               | 10528                  | 466                         | 10994              |                             | 10994                      |                              | 10994                       | 2240                        | 616                             |                       | 2855.664                             |                         |                                | 395.78              |                         | 395.784                   | 314.1       | 42.8                   | 10.5                      | 367.4                       | 28.38                                 |                                    |                      |                                         | 1                                         | 3                         | 4                                       | Wang Zhengkuan                   | 4                |                |
| 7                | 1978 | Wang Tingxi                       | poor peasant         | 4              | worker            |       |                               | 1873                   | 124                         | 1997               |                             | 1997                       | 4000                         | 5997                        | 1280                        | 336                             |                       | 1615.832                             |                         |                                | 71.89               |                         | 85.892                    | 177.8       | 24.2                   | 6                         | 208                         | -122.11                               |                                    |                      |                                         | 1                                         | 3                         | 4                                       | Wang Zhengkuan                   | 4                |                |
| 9                | 1978 | Wang Tingzhi                      | poor peasant         | 1              |                   |       |                               | 847                    | 774                         | 1621               |                             | 1621                       |                              | 1621                        | 320                         | 91                              |                       | 410.776                              |                         |                                | 58.36               |                         | 58.356                    | 45.2        | 6.2                    | 1.5                       | 52.9                        | 5.46                                  |                                    |                      |                                         | 2                                         | 3                         | 4                                       | Wang Zhengkuan                   | 4                |                |
| 10               | 1978 | Wang Zuoxing                      | poor peasant         | 5              |                   |       |                               | 3892                   | 430                         | 4322               |                             | 4322                       |                              | 4322                        | 1600                        | 242                             |                       | 1842.032                             |                         |                                | 155.59              |                         | 155.592                   | 202.6       | 27.6                   | 7.5                       | 237.7                       | -82.11                                |                                    |                      |                                         | 2                                         | 3                         | 4                                       | Wang Zhengkuan                   | 4                |                |
| 11               | 1978 | Wang Zuoqi                        | poor peasant         | 5              |                   |       |                               | 6211                   | 1420                        | 7631               |                             | 7631                       |                              | 7631                        | 1600                        | 427                             | 150                   | 2177.336                             |                         |                                | 274.72              |                         | 274.716                   | 239.5       | 32.7                   | 7.5                       | 279.7                       | -4.98                                 |                                    |                      |                                         | 2                                         | 3                         | 4                                       | Wang Zhengkuan                   | 4                |                |
| 12               | 1978 | Kaiying's mother                  | poor peasant         | 1              |                   |       |                               | 1500                   | 0                           | 1500               |                             | 1500                       |                              | 1500                        | 320                         | 84                              |                       | 404                                  |                         |                                | 54.00               |                         | 54                        | 44.4        | 6.1                    | 1.5                       | 52                          | 2.00                                  |                                    |                      |                                         | 2                                         | 3                         | 4                                       | Wang Zhengkuan                   | 4                |                |
| 14               | 1978 | Feng Kailing                      | landlord             | 2              |                   |       |                               | 2779                   | 48                          | 2827               |                             | 2827                       |                              | 2827                        | 640                         | 158                             |                       | 798.312                              |                         |                                | 101.77              |                         | 101.772                   | 87.8        | 12                     | 3                         | 102.8                       | -1.03                                 |                                    |                      |                                         | 3                                         | 1                         | 4                                       | Wang Zhengkuan                   | 4                |                |
| 15               | 1978 | Feng Huazhong                     | landlord             | 4              |                   |       |                               | 3497                   | 728                         | 4225               |                             | 4225                       |                              | 4225                        | 1280                        | 237                             |                       | 1516.6                               |                         |                                | 152.10              |                         | 152.1                     | 166.9       | 22.8                   | 6                         | 195.7                       | -43.60                                |                                    |                      |                                         | 3                                         | 1                         | 4                                       | Wang Zhengkuan                   | 4                |                |
| 16               | 1978 | Wang Sichun                       | poor peasant         | 4              |                   |       |                               | 3251                   | 20                          | 3271               |                             | 3271                       |                              | 3271                        | 1280                        | 183                             |                       | 1463.176                             |                         |                                | 117.76              |                         | 122.356                   | 160.9       | 21.9                   | 6                         | 188.8                       | -66.44                                |                                    |                      |                                         | 2                                         | 3                         | 4                                       | Wang Zhengkuan                   | 4                |                |
| 17               | 1978 | Chen Xuezhong                     | poor peasant         | 2              |                   |       |                               | 2789                   | 179                         | 2968               |                             | 2968                       |                              | 2968                        | 640                         | 166                             | -110                  | 696.208                              |                         |                                | 106.85              |                         | 106.848                   | 76.6        | 10.4                   | 3                         | 90                          | 16.85                                 |                                    |                      |                                         | 1                                         | 3                         | 4                                       | Wang Zhengkuan                   | 4                |                |
| 18               | 1978 | Feng Baojin                       | poor peasant         | 3              |                   |       |                               | 4496                   | 496                         | 4992               |                             | 4992                       |                              | 4992                        | 960                         | 280                             |                       | 1239.552                             |                         |                                | 179.71              |                         | 179.712                   | 136.4       | 18.6                   | 4.5                       | 159.5                       | 20.21                                 |                                    |                      |                                         | 1                                         | 3                         | 4                                       | Wang Zhengkuan                   | 4                |                |

APPENDIX B

(cont.)

| Household number | Year | Name of the head of the household | Family class status  | Family members | Family characters | Labor | Number of standard population | Work points settlement |                             |                    |                     |                    | Grain distribution  |                    |                             |                                 |                                      | Firewood distribution | Work points income (Yuan) |                                |                     |                         | Deducted amount (Yuan)     |             |                        |                           |                                       | Distribution results (Yuan) | Distribution results (Yuan)        |                      |                                         | Guanxi                                    |                           |                                         |                      |                  |                |                |
|------------------|------|-----------------------------------|----------------------|----------------|-------------------|-------|-------------------------------|------------------------|-----------------------------|--------------------|---------------------|--------------------|---------------------|--------------------|-----------------------------|---------------------------------|--------------------------------------|-----------------------|---------------------------|--------------------------------|---------------------|-------------------------|----------------------------|-------------|------------------------|---------------------------|---------------------------------------|-----------------------------|------------------------------------|----------------------|-----------------------------------------|-------------------------------------------|---------------------------|-----------------------------------------|----------------------|------------------|----------------|----------------|
|                  |      |                                   |                      |                |                   |       |                               | Laboring work points   | Farmyard manure work points | Sum of work points | subsidy work points | Sum of work points | Subsidy work points | Sum of work points | Grain distribution: rations | Grain distribution: work points | Grain distribution: subsidized grain |                       | Grain distribution: sum   | Grain distribution: per capita | Income: work points | Income: welfare subsidy | Income: prepaied overdraft | Income: sum | Deducted amount: grain | Deducted amount: firewood | Deducted amount: other things in kind |                             | Deducted amount: withdraw advances | Deducted amount: sum | Distribution results: personal solution | Distribution results: collective solution | Distribution results: sum | Interpersonal relationship with leaders | Family class status2 | Number of leader | Name of leader | Term of office |
|                  |      |                                   |                      |                |                   |       |                               |                        |                             |                    |                     |                    |                     |                    |                             |                                 |                                      |                       |                           |                                |                     |                         |                            |             |                        |                           |                                       |                             |                                    |                      |                                         |                                           |                           |                                         |                      |                  |                |                |
| 19               | 1978 | Feng Xianzhong                    | poor peasant         | 4              |                   |       | 3466                          | 483                    | 3949                        |                    | 3949                |                    | 3949                | 1280               | 221                         | -130                            | 1371.144                             |                       | 142.16                    |                                |                     | 142.164                 | 150.8                      | 20.6        | 6                      |                           | 177.4                                 | -35.24                      |                                    |                      | 3                                       | 3                                         | 4                         | Wang Zhengkuan                          | 4                    |                  |                |                |
| 20               | 1978 | Feng Kaiyuan                      | poor peasant         | 7              |                   |       | 7552                          | 979                    | 8531                        |                    | 8531                |                    | 8531                | 2240               | 478                         | 80                              | 2797.736                             |                       | 307.12                    |                                |                     | 307.116                 | 307.8                      | 42          | 10.5                   |                           | 360.3                                 | -53.18                      |                                    |                      | 2                                       | 3                                         | 4                         | Wang Zhengkuan                          | 4                    |                  |                |                |
| 21               | 1978 | Feng Kaiwu                        | poor peasant         | 4              |                   |       | 6944                          | 699                    | 7643                        |                    | 7643                |                    | 7643                | 1280               | 428                         |                                 | 1708.008                             |                       | 275.15                    |                                |                     | 275.148                 | 187.9                      | 25.6        | 6                      |                           | 219.5                                 | 55.65                       |                                    |                      | 2                                       | 3                                         | 4                         | Wang Zhengkuan                          | 4                    |                  |                |                |
| 22               | 1978 | Feng Kaiwen                       | poor peasant         | 7              |                   |       | 8888                          | 431                    | 9319                        |                    | 9319                |                    | 9319                | 2240               | 522                         |                                 | 2761.864                             |                       | 335.48                    |                                |                     | 335.484                 | 303.8                      | 41.4        | 10.5                   |                           | 355.7                                 | -20.22                      |                                    |                      | 1                                       | 3                                         | 4                         | Wang Zhengkuan                          | 4                    |                  |                |                |
| 23               | 1978 | Kou Huaisheng                     | poor peasant         | 8              |                   |       | 13105                         | 629                    | 13734                       |                    | 13734               |                    | 13734               | 2560               | 769                         |                                 | 3329.104                             |                       | 494.42                    |                                |                     | 494.424                 | 366.2                      | 49.9        | 12                     |                           | 428.1                                 | 66.32                       |                                    |                      | 1                                       | 3                                         | 4                         | Wang Zhengkuan                          | 4                    |                  |                |                |
| 24               | 1978 | Anming's mother                   | landlord             | 1              |                   |       | 911                           | 24                     | 935                         |                    | 935                 |                    | 935                 | 320                | 52                          |                                 | 372.36                               |                       | 33.66                     |                                |                     | 33.66                   | 40.9                       | 5.6         | 1.5                    |                           | 48                                    | -14.34                      |                                    |                      | 2                                       | 1                                         | 4                         | Wang Zhengkuan                          | 4                    |                  |                |                |
| 25               | 1978 | Wang Xiujuan                      | poor peasant         | 2              |                   |       | 3252                          | 301                    | 3553                        |                    | 3553                |                    | 3553                | 640                | 199                         |                                 | 838.968                              |                       | 127.91                    |                                |                     | 127.908                 | 92.3                       | 12.6        | 3                      |                           | 107.9                                 | 20.01                       |                                    |                      | 2                                       | 3                                         | 4                         | Wang Zhengkuan                          | 4                    |                  |                |                |
| 26               | 1978 | Feng Zhaobu                       | middle-class peasant | 4              | worker            |       | 2438                          | 0                      | 2438                        |                    | 2438                | 3500               | 5938                | 1280               | 333                         |                                 | 1612.528                             |                       | 87.77                     |                                |                     | 87.768                  | 177.4                      | 24.2        | 6                      |                           | 207.6                                 | -119.83                     |                                    |                      | 1                                       | 2                                         | 4                         | Wang Zhengkuan                          | 4                    |                  |                |                |
| 27               | 1978 | Feng Zhaohuan                     | middle-class peasant | 6              |                   |       | 4823                          | 739                    | 5562                        |                    | 5562                |                    | 5562                | 1920               | 311                         |                                 | 2231.472                             |                       | 200.23                    |                                | 12.7                | 212.932                 | 245.4                      | 33.5        | 9                      |                           | 287.9                                 | -74.97                      |                                    |                      | 2                                       | 2                                         | 4                         | Wang Zhengkuan                          | 4                    |                  |                |                |
| 28               | 1978 | Zhaohuan's mother                 | middle-class peasant | 1              |                   |       | 1500                          | 0                      | 1500                        |                    | 1500                |                    | 1500                | 320                | 84                          |                                 | 404                                  |                       | 54.00                     |                                |                     | 54                      | 44.4                       | 6.1         | 1.5                    |                           | 52                                    | 2.00                        |                                    |                      | 2                                       | 2                                         | 4                         | Wang Zhengkuan                          | 4                    |                  |                |                |
| 29               | 1978 | Feng Kaijun                       | poor peasant         | 8              |                   |       | 11519                         | 925                    | 12444                       |                    | 12444               |                    | 12444               | 2560               | 697                         |                                 | 3256.864                             |                       | 447.98                    |                                |                     | 447.984                 | 358.3                      | 48.9        | 12                     |                           | 419.2                                 | 28.78                       |                                    |                      | 2                                       | 3                                         | 4                         | Wang Zhengkuan                          | 4                    |                  |                |                |
| 30               | 1978 | Feng Kaizheng                     | poor peasant         | 8              |                   |       | 10649                         | 1007                   | 11656                       |                    | 11656               |                    | 11656               | 2560               | 653                         |                                 | 3212.736                             |                       | 419.62                    |                                |                     | 419.616                 | 353.3                      | 48.2        | 12                     |                           | 413.5                                 | 6.12                        |                                    |                      | 2                                       | 3                                         | 4                         | Wang Zhengkuan                          | 4                    |                  |                |                |
| 31               | 1978 | Feng Zhaoxin                      | poor peasant         | 6              |                   |       | 10361                         | 608                    | 10969                       |                    | 10969               |                    | 10969               | 1920               | 614                         |                                 | 2534.264                             |                       | 394.88                    |                                |                     | 394.884                 | 278.7                      | 38          | 9                      |                           | 325.7                                 | 69.18                       |                                    |                      | 3                                       | 3                                         | 4                         | Wang Zhengkuan                          | 4                    |                  |                |                |
| 32               | 1978 | Wang Xiangyun                     | middle-class peasant | 1              |                   |       | 1480                          | 100                    | 1580                        |                    | 1580                |                    | 1580                | 320                | 88                          |                                 | 408.48                               |                       | 56.88                     |                                |                     | 56.88                   | 44.4                       | 6.1         | 1.5                    |                           | 52                                    | 4.88                        |                                    |                      | 3                                       | 2                                         | 4                         | Wang Zhengkuan                          | 4                    |                  |                |                |
| 33               | 1978 | Wang Xuewen                       | middle-class peasant | 3              |                   |       | 4582                          | 183                    | 4765                        |                    | 4765                |                    | 4765                | 960                | 267                         |                                 | 1226.84                              |                       | 171.54                    |                                |                     | 171.54                  | 135                        | 18.4        | 4.5                    |                           | 157.9                                 | 13.64                       |                                    |                      | 2                                       | 2                                         | 4                         | Wang Zhengkuan                          | 4                    |                  |                |                |
| 34               | 1978 | Feng Xianmin                      | middle-class peasant | 3              |                   |       | 5362                          | 317                    | 5679                        |                    | 5679                |                    | 5679                | 960                | 318                         |                                 | 1278.024                             |                       | 204.44                    |                                |                     | 204.444                 | 140.6                      | 19.2        | 4.5                    |                           | 164.3                                 | 40.14                       |                                    |                      | 2                                       | 2                                         | 4                         | Wang Zhengkuan                          | 4                    |                  |                |                |
| 35               | 1978 | Feng Xianhua                      | middle-class peasant | 2              |                   |       | 3449                          | 305                    | 3754                        |                    | 3754                |                    | 3754                | 640                | 210                         |                                 | 850.224                              |                       | 135.14                    |                                |                     | 135.144                 | 93.5                       | 12.8        | 3                      |                           | 109.3                                 | 25.84                       |                                    |                      | 2                                       | 2                                         | 4                         | Wang Zhengkuan                          | 4                    |                  |                |                |
| 36               | 1978 | Feng Xiaoxi                       | middle-class peasant | 4              |                   |       | 10019                         | 298                    | 10317                       |                    | 10317               |                    | 10317               | 1280               | 578                         |                                 | 1857.752                             |                       | 371.41                    |                                |                     | 371.412                 | 204.4                      | 27.9        | 6                      |                           | 238.3                                 | 133.11                      |                                    |                      | 1                                       | 2                                         | 4                         | Wang Zhengkuan                          | 4                    |                  |                |                |
| 37               | 1978 | Feng Xiangui                      | middle-class peasant | 7              |                   |       | 6703                          | 597                    | 7300                        |                    | 7300                |                    | 7300                | 2240               | 409                         |                                 | 2648.8                               |                       | 262.80                    |                                | 8.4                 | 271.2                   | 291                        | 39.7        | 10.5                   |                           | 341.2                                 | -70.00                      |                                    |                      | 2                                       | 2                                         | 4                         | Wang Zhengkuan                          | 4                    |                  |                |                |
| 38               | 1978 | Feng Xianzhen                     | middle-class peasant | 5              |                   |       | 10394                         | 377                    | 10771                       |                    | 10771               |                    | 10771               | 1600               | 603                         |                                 | 2203.176                             |                       | 387.76                    |                                |                     | 387.756                 | 242.3                      | 33          | 7.5                    |                           | 282.8                                 | 104.96                      |                                    |                      | 2                                       | 2                                         | 4                         | Wang Zhengkuan                          | 4                    |                  |                |                |

(cont.)

| Household number | Year | Name of the head of the household | Family class status  | Family members | Family characters | Labor | Number of standard population | Work points settlement |                             |                    |                             |                            | Grain distribution           |                             |                             |                                 |                                      | Firewood distribution   | Work points income (Yuan)      |                     |                         |                            | Deducted amount (Yuan) |                        |                           |                                       |                                    | Distribution results (Yuan) | Distribution results (Yuan)             |                                           |                           | Guanxi                                  |                      |                  |                |                |
|------------------|------|-----------------------------------|----------------------|----------------|-------------------|-------|-------------------------------|------------------------|-----------------------------|--------------------|-----------------------------|----------------------------|------------------------------|-----------------------------|-----------------------------|---------------------------------|--------------------------------------|-------------------------|--------------------------------|---------------------|-------------------------|----------------------------|------------------------|------------------------|---------------------------|---------------------------------------|------------------------------------|-----------------------------|-----------------------------------------|-------------------------------------------|---------------------------|-----------------------------------------|----------------------|------------------|----------------|----------------|
|                  |      |                                   |                      |                |                   |       |                               | Laboring work points   | Farmyard manure work points | Sum of work points | subsidy work points by cash | Sum of work points by cash | Subsidy work points by grain | Sum of work points by grain | Grain distribution: rations | Grain distribution: work points | Grain distribution: subsidized grain | Grain distribution: sum | Grain distribution: per capita | Income: work points | Income: welfare subsidy | Income: prepaied overdraft | Income: sum            | Deducted amount: grain | Deducted amount: firewood | Deducted amount: other things in kind | Deducted amount: withdraw advances | Deducted amount: sum        | Distribution results: personal solution | Distribution results: collective solution | Distribution results: sum | Interpersonal relationship with leaders | Family class status2 | Number of leader | Name of leader | Term of office |
| 39               | 1978 | Feng Xianxue                      | middle-class peasant | 5              |                   |       |                               | 5463                   | 530                         | 5993               | 500                         | 6493                       |                              | 6493                        | 1600                        | 364                             |                                      | 1963.608                |                                | 233.75              |                         | 2                          | 235.748                | 216                    | 29.5                      | 7.5                                   |                                    | 253                         | -17.25                                  |                                           |                           | 1                                       | 2                    | 4                | Wang Zhengkuan | 4              |
| 40               | 1978 | Wang Tingpin                      | poor peasant         | 2              |                   |       |                               | 3932                   | 384                         | 4316               |                             | 4316                       |                              | 4316                        | 640                         | 242                             |                                      | 881.696                 |                                | 155.38              |                         |                            | 155.376                | 97                     | 13.2                      | 3                                     |                                    | 113.2                       | 42.18                                   |                                           |                           | 1                                       | 3                    | 4                | Wang Zhengkuan | 4              |
| 41               | 1978 | Wang Zhengfen                     | middle-class peasant | 2              |                   |       |                               | 2749                   | 308                         | 3057               |                             | 3057                       |                              | 3057                        | 640                         | 171                             |                                      | 811.192                 |                                | 110.05              |                         |                            | 110.052                | 89.2                   | 12.2                      | 3                                     |                                    | 104.4                       | 5.65                                    |                                           |                           | 2                                       | 2                    | 4                | Wang Zhengkuan | 4              |
| 42               | 1978 | Wu Zongxiu                        | middle-class peasant | 1              |                   |       |                               | 2281                   | 116                         | 2397               |                             | 2397                       |                              | 2397                        | 320                         | 134                             |                                      | 454.232                 |                                | 86.29               |                         |                            | 86.292                 | 49.9                   | 6.8                       | 1.5                                   |                                    | 58.2                        | 28.09                                   |                                           |                           | 3                                       | 2                    | 4                | Wang Zhengkuan | 4              |
| 43               | 1978 | Wang Depo                         | poor peasant         | 6              |                   |       |                               | 6647                   | 701                         | 7348               |                             | 7348                       |                              | 7348                        | 1920                        | 411                             | 110                                  | 2441.488                |                                | 264.53              |                         |                            | 264.528                | 268.5                  | 36.2                      | 9                                     |                                    | 313.7                       | -49.17                                  |                                           |                           | 2                                       | 3                    | 4                | Wang Zhengkuan | 4              |
| 44               | 1978 | Wang Dexue                        | poor peasant         | 2              |                   |       |                               | 2774                   | 0                           | 2774               |                             | 2774                       |                              | 2774                        | 640                         | 155                             |                                      | 795.344                 |                                | 99.86               |                         |                            | 99.864                 | 87.5                   | 11.9                      | 3                                     |                                    | 102.4                       | -2.54                                   |                                           |                           | 1                                       | 3                    | 4                | Wang Zhengkuan | 4              |
| 45               | 1978 | Wang Dekuan                       | poor peasant         | 3              |                   |       |                               | 3321                   | 126                         | 3447               |                             | 3447                       |                              | 3447                        | 960                         | 193                             |                                      | 1153.032                |                                | 124.09              |                         |                            | 124.092                | 126.8                  | 17.3                      | 4.5                                   |                                    | 148.6                       | -24.51                                  |                                           |                           | 1                                       | 3                    | 4                | Wang Zhengkuan | 4              |
| 46               | 1978 | Wang Tingzhen                     | poor peasant         | 7              |                   |       |                               | 5426                   | 416                         | 5842               | 5000                        | 10842                      |                              | 10842                       | 2240                        | 607                             |                                      | 2847.152                |                                | 390.31              |                         |                            | 390.312                | 313.2                  | 42.7                      | 10.5                                  |                                    | 366.4                       | 23.91                                   |                                           |                           | 1                                       | 3                    | 4                | Wang Zhengkuan | 4              |
| 47               | 1978 | Wang Tingjian                     | poor peasant         | 5              |                   |       |                               | 8947                   | 318                         | 9265               |                             | 9265                       |                              | 9265                        | 1600                        | 519                             |                                      | 2118.84                 |                                | 333.54              |                         |                            | 333.54                 | 233.1                  | 31.8                      | 7.5                                   |                                    | 272.4                       | 61.14                                   |                                           |                           | 1                                       | 3                    | 4                | Wang Zhengkuan | 4              |
| 48               | 1978 | Wang Zhengcai                     | poor peasant         | 6              |                   |       |                               | 8619                   | 581                         | 9200               |                             | 9200                       |                              | 9200                        | 1920                        | 515                             |                                      | 2435.2                  |                                | 331.20              |                         |                            | 331.2                  | 267.9                  | 36.5                      | 9                                     |                                    | 313.4                       | 17.80                                   |                                           |                           | 1                                       | 3                    | 4                | Wang Zhengkuan | 4              |
| 49               | 1978 | Wang Zhengxuan                    | poor peasant         | 5              |                   |       |                               | 5623                   | 525                         | 6148               | 1500                        | 7648                       |                              | 7648                        | 1600                        | 428                             |                                      | 2028.288                |                                | 275.33              |                         |                            | 275.328                | 223.1                  | 30.4                      | 7.5                                   |                                    | 261                         | 14.33                                   |                                           |                           | 1                                       | 3                    | 4                | Wang Zhengkuan | 4              |
| 50               | 1978 | Chao Shengqi                      | poor peasant         | 2              |                   |       |                               | 2553                   | 363                         | 2916               |                             | 2916                       | 200                          | 3116                        | 640                         | 174                             | 90                                   | 904.496                 |                                | 104.98              |                         |                            | 104.976                | 99.4                   | 13.6                      | 3                                     |                                    | 116                         | -11.02                                  |                                           |                           | 2                                       | 3                    | 4                | Wang Zhengkuan | 4              |
| 51               | 1978 | Chao Shengyu                      | poor peasant         | 3              | worker            |       |                               | 1791                   | 288                         | 2079               |                             | 2079                       | 2300                         | 4379                        | 960                         | 245                             | 17                                   | 1222.224                |                                | 74.84               |                         |                            | 74.844                 | 134.4                  | 18.3                      | 4.5                                   |                                    | 157.2                       | -82.36                                  |                                           |                           | 2                                       | 3                    | 4                | Wang Zhengkuan | 4              |
| 52               | 1978 | Wang Zhengyan                     | poor peasant         | 2              |                   |       |                               | 5162                   | 338                         | 5500               |                             | 5500                       |                              | 5500                        | 640                         | 308                             | 90                                   | 1038                    |                                | 198.00              |                         |                            | 198                    | 114.2                  | 15.6                      | 3                                     |                                    | 132.8                       | 65.20                                   |                                           |                           | 1                                       | 3                    | 4                | Wang Zhengkuan | 4              |
| 54               | 1978 | Wang Zhenggui                     | poor peasant         | 5              |                   |       |                               | 6693                   | 875                         | 7568               |                             | 7568                       |                              | 7568                        | 1600                        | 424                             |                                      | 2023.808                |                                | 272.45              |                         |                            | 272.448                | 222.6                  | 30.4                      | 7.5                                   |                                    | 260.5                       | 11.95                                   |                                           |                           | 1                                       | 3                    | 4                | Wang Zhengkuan | 4              |
| 56               | 1978 | Wang Deshan                       | poor peasant         | 5.5            |                   |       |                               | 4878                   | 513                         | 5391               |                             | 5391                       |                              | 5391                        | 1760                        | 302                             |                                      | 2061.896                |                                | 194.08              |                         | 4.1                        | 198.176                | 226.8                  | 30.9                      | 8.3                                   |                                    | 266                         | -67.82                                  |                                           |                           | 2                                       | 3                    | 4                | Wang Zhengkuan | 4              |
| 57               | 1978 | Wang Deling                       | poor peasant         | 6.5            |                   |       |                               | 4474                   | 396                         | 4870               |                             | 4870                       |                              | 4870                        | 2080                        | 273                             |                                      | 2352.72                 |                                | 175.32              |                         | 8.61                       | 183.93                 | 258.8                  | 35.3                      | 9.8                                   |                                    | 303.9                       | -119.97                                 |                                           |                           | 2                                       | 3                    | 4                | Wang Zhengkuan | 4              |
| 60               | 1978 | Feng Zhaoyuan                     | poor peasant         | 1              |                   |       |                               | 2093                   | 0                           | 2093               |                             | 2093                       |                              | 2093                        | 320                         | 117                             |                                      | 437.208                 |                                | 75.35               |                         |                            | 75.348                 | 48.1                   | 6.6                       | 1.5                                   |                                    | 56.2                        | 19.15                                   |                                           |                           | 2                                       | 3                    | 4                | Wang Zhengkuan | 4              |
| 61               | 1978 | Ge Zhengxian                      | poor peasant         | 1              |                   |       |                               | 2078                   | 0                           | 2078               |                             | 2078                       |                              | 2078                        | 320                         | 116                             |                                      | 436.368                 |                                | 74.81               |                         |                            | 74.808                 | 48                     | 6.5                       | 1.5                                   |                                    | 56                          | 18.81                                   |                                           |                           | 3                                       | 3                    | 4                | Wang Zhengkuan | 4              |
| 65               | 1978 | Ge Huihui                         | educated youth       | 1              | educated youth    |       |                               | 3220                   | 0                           | 3220               |                             | 3220                       |                              | 3220                        | 320                         | 180                             |                                      | 500.32                  |                                | 115.92              |                         |                            | 115.92                 | 55                     | 7.5                       | 1.5                                   |                                    | 64                          | 51.92                                   |                                           |                           | 1                                       | 4                    | 4                | Wang Zhengkuan | 4              |
| 68               | 1978 | Ma Lianjun                        | middle-class peasant | 10             |                   |       |                               | 11311                  | 675                         | 11986              |                             | 11986                      |                              | 11986                       | 3200                        | 671                             |                                      | 3871.216                |                                | 431.50              |                         |                            | 431.496                | 425.8                  | 58.1                      | 15                                    |                                    | 498.9                       | -67.40                                  |                                           |                           | 2                                       | 2                    | 4                | Wang Zhengkuan | 4              |
| 69               | 1978 | Feng Xiaolou                      | landlord             | 1              |                   |       |                               | 2622                   | 0                           | 2622               |                             | 2622                       |                              | 2622                        | 320                         | 147                             |                                      | 466.832                 |                                | 94.39               |                         |                            | 94.392                 | 51.4                   | 7                         | 1.5                                   |                                    | 59.9                        | 34.49                                   |                                           |                           | 3                                       | 1                    | 4                | Wang Zhengkuan | 4              |
| 77               | 1978 | Chen Huixing                      | poor peasant         | 2              |                   |       |                               | 3373                   | 103                         | 3476               |                             | 3476                       |                              | 3476                        | 640                         | 195                             |                                      | 834.656                 |                                | 125.14              |                         |                            | 125.136                | 91.9                   | 12.5                      | 3                                     |                                    | 107.4                       | 17.74                                   |                                           |                           | 3                                       | 3                    | 4                | Wang Zhengkuan | 4              |
| 87               | 1978 | Wang Changhan                     | poor peasant         |                |                   |       |                               | 800                    | 0                           | 800                | 200                         | 1000                       |                              | 1000                        | 0                           | 56                              |                                      | 56                      |                                | 36.00               |                         |                            | 36                     | 6.2                    | 0.8                       | 0                                     |                                    | 7                           | 29.00                                   |                                           |                           | 1                                       | 3                    | 4                | Wang Zhengkuan | 4              |
| 21s              | 1978 | Feng Zhaoqian                     | poor peasant         | 5              |                   |       |                               | 5130                   | 389                         | 5519               |                             | 5519                       |                              | 5519                        | 1600                        | 309                             |                                      | 1909.064                |                                | 198.68              |                         | 7.6                        | 206.284                | 210                    | 28.6                      | 7.5                                   |                                    | 246.1                       | -39.82                                  |                                           |                           | 1                                       | 3                    | 4                | Wang Zhengkuan | 4              |
| 30s              | 1978 | Feng Zhaobin                      | poor peasant         | 2.8            |                   |       |                               | 3951                   | 630                         | 4581               |                             | 4581                       |                              | 4581                        | 896                         | 257                             |                                      | 1152.536                |                                | 164.92              |                         |                            | 164.916                | 126.8                  | 17.3                      | 4.5                                   |                                    | 148.6                       | 16.32                                   |                                           |                           | 2                                       | 3                    | 4                | Wang Zhengkuan | 4              |

(cont.)

| Household number | Year | Name of the head of the household | Family class status  | Family members | Family characters | Labor | Number of standard population | Work points settlement |                             |                    |                             |                            |                              |                             |                             | Grain distribution              |                                      |                         |                                |                     | Firewood distribution | Work points income (Yuan) |                            |             |                        | Deducted amount (Yuan)    |                                       |                                    |                      |                                         | Distribution results (Yuan) | Distribution results (Yuan)               |                           |                                         |                      | Guanxi           |                |                |  |  |
|------------------|------|-----------------------------------|----------------------|----------------|-------------------|-------|-------------------------------|------------------------|-----------------------------|--------------------|-----------------------------|----------------------------|------------------------------|-----------------------------|-----------------------------|---------------------------------|--------------------------------------|-------------------------|--------------------------------|---------------------|-----------------------|---------------------------|----------------------------|-------------|------------------------|---------------------------|---------------------------------------|------------------------------------|----------------------|-----------------------------------------|-----------------------------|-------------------------------------------|---------------------------|-----------------------------------------|----------------------|------------------|----------------|----------------|--|--|
|                  |      |                                   |                      |                |                   |       |                               | Laboring work points   | Farmyard manure work points | Sum of work points | subsidy work points by cash | Sum of work points by cash | Subsidy work points by grain | Sum of work points by grain | Grain distribution: rations | Grain distribution: work points | Grain distribution: subsidized grain | Grain distribution: sum | Grain distribution: per capita | Income: work points |                       | Income: welfare subsidy   | Income: prepaied overdraft | Income: sum | Deducted amount: grain | Deducted amount: firewood | Deducted amount: other things in kind | Deducted amount: withdraw advances | Deducted amount: sum | Distribution results: personal solution |                             | Distribution results: collective solution | Distribution results: sum | Interpersonal relationship with leaders | Family class status2 | Number of leader | Name of leader | Term of office |  |  |
|                  |      |                                   |                      |                |                   |       |                               |                        |                             |                    |                             |                            |                              |                             |                             |                                 |                                      |                         |                                |                     |                       |                           |                            |             |                        |                           |                                       |                                    |                      |                                         |                             |                                           |                           |                                         |                      |                  |                |                |  |  |
| 31s              | 1978 | Feng Xianbao                      | poor peasant         | 4              |                   |       |                               | 3774                   | 657                         | 4431               |                             | 4431                       |                              | 4431                        | 1280                        | 248                             |                                      | 1528.136                |                                | 159.52              |                       | 159.516                   | 168.1                      | 22.9        | 6                      |                           | 197                                   | -37.48                             |                      |                                         | 3                           | 3                                         | 4                         | Wang Zhengkuan                          | 4                    |                  |                |                |  |  |
| 32s1             | 1978 | Wang Like                         | middle-class peasant | 3              |                   |       |                               | 3515                   | 285                         | 3800               |                             | 3800                       |                              | 3800                        | 960                         | 213                             | -130                                 | 1042.8                  |                                | 136.80              |                       | 136.8                     | 120.7                      | 16.5        | 4.5                    |                           | 141.7                                 | -4.90                              |                      |                                         | 2                           | 2                                         | 4                         | Wang Zhengkuan                          | 4                    |                  |                |                |  |  |
| 32s2             | 1978 | Wang Liju                         | middle-class peasant | 4              |                   |       |                               | 6256                   | 606                         | 6862               |                             | 6862                       |                              | 6862                        | 1280                        | 384                             |                                      | 1664.272                |                                | 247.03              |                       | 247.032                   | 183                        | 25          | 6                      |                           | 214                                   | 33.03                              |                      |                                         | 2                           | 2                                         | 4                         | Wang Zhengkuan                          | 4                    |                  |                |                |  |  |
| 47s1             | 1978 | Wang Dezhong                      | middle-class peasant | 4              |                   |       |                               | 6400                   | 329                         | 6729               | 300                         | 7029                       |                              | 7029                        | 1280                        | 394                             |                                      | 1673.624                |                                | 253.04              |                       | 253.044                   | 184.1                      | 25.1        | 6                      |                           | 215.2                                 | 37.84                              |                      |                                         | 2                           | 2                                         | 4                         | Wang Zhengkuan                          | 4                    |                  |                |                |  |  |
| 48s              | 1978 | Wang Jiaxun                       | poor peasant         | 4              |                   |       |                               | 3965                   | 1186                        | 5151               |                             | 5151                       |                              | 5151                        | 1280                        | 288                             |                                      | 1568.456                |                                | 185.44              |                       | 185.436                   | 172.5                      | 23.5        | 6                      |                           | 202                                   | -16.56                             |                      |                                         | 2                           | 3                                         | 4                         | Wang Zhengkuan                          | 4                    |                  |                |                |  |  |
| 1                | 1979 | Ma Zhenqi                         | middle-class peasant | 2              |                   |       | 20                            | 1460                   | 552                         | 2012               |                             | 2012                       |                              | 2012                        | 680                         | 169.008                         |                                      | 849.008                 | 849.008                        | 72.432              |                       |                           | 72.432                     | 105.27699   | 2.8                    |                           | 108.07699                             | -35.64                             |                      | 13.7                                    | 3                           | 2                                         | 5                         | Wang Dezhong                            | 3                    |                  |                |                |  |  |
| 2                | 1979 | Wang Xinming                      | middle-class peasant | 7              |                   |       | 70                            | 9656                   | 986                         | 10642              |                             | 10642                      | 3500                         | 14142                       | 2380                        | 1187.928                        |                                      | 3567.928                | 3567.928                       | 383.112             |                       | 34.6                      | 417.712                    | 442.42307   | 9.8                    |                           | 452.22307                             | -34.51                             |                      |                                         | 2                           | 2                                         | 5                         | Wang Dezhong                            | 3                    |                  |                |                |  |  |
| 3                | 1979 | Feng Kaiying                      | poor peasant         | 7              |                   |       | 58                            | 6576                   | 1004                        | 7580               |                             | 7580                       |                              | 7580                        | 1972                        | 636.72                          |                                      | 2608.72                 | 2608.72                        | 272.88              |                       |                           | 272.88                     | 323.48128   | 9.8                    |                           | 333.28128                             | -60.40                             |                      | 7.4                                     | 3                           | 3                                         | 5                         | Wang Dezhong                            | 3                    |                  |                |                |  |  |
| 4                | 1979 | Wang Zuopeng                      | poor peasant         | 2              |                   |       | 20                            | 4289                   | 265                         | 4554               |                             | 4554                       |                              | 4554                        | 680                         | 382.536                         |                                      | 1062.536                | 1062.536                       | 163.944             |                       |                           | 163.944                    | 131.75446   | 2.8                    |                           | 134.55446                             | 29.39                              |                      |                                         | 3                           | 3                                         | 5                         | Wang Dezhong                            | 3                    |                  |                |                |  |  |
| 5                | 1979 | Wang Zuoliang                     | poor peasant         | 5              |                   |       | 48                            | 7814                   | 1381                        | 9195               |                             | 9195                       |                              | 9195                        | 1632                        | 772.38                          |                                      | 2404.38                 | 2404.38                        | 331.02              |                       |                           | 331.02                     | 298.14312   | 7                      |                           | 305.14312                             | 25.88                              |                      |                                         | 2                           | 3                                         | 5                         | Wang Dezhong                            | 3                    |                  |                |                |  |  |
| 6                | 1979 | Wang Tingmei                      | poor peasant         | 7              |                   |       | 68                            | 12575                  | 1059                        | 13634              |                             | 13634                      |                              | 13634                       | 2312                        | 1145.256                        |                                      | 3457.256                | 3457.256                       | 490.824             |                       |                           | 490.824                    | 428.69974   | 9.8                    |                           | 438.49974                             | 52.32                              |                      |                                         | 2                           | 3                                         | 5                         | Wang Dezhong                            | 3                    |                  |                |                |  |  |
| 7                | 1979 | Wang Tingxi                       | poor peasant         | 4              | worker            |       | 38                            | 2062                   | 213                         | 2275               |                             | 2275                       | 4000                         | 6275                        | 1292                        | 527.1                           |                                      | 1819.1                  | 1819.1                         | 81.9                | 9                     | 3                         | 93.9                       | 225.5684    | 5.6                    |                           | 231.1684                              | -137.27                            |                      |                                         | 2                           | 3                                         | 5                         | Wang Dezhong                            | 3                    |                  |                |                |  |  |
| 9                | 1979 | Wang Tingzhi                      | poor peasant         | 1              |                   |       | 10                            | 1693                   | 248                         | 1941               |                             | 1941                       |                              | 1941                        | 340                         | 163.044                         |                                      | 503.044                 | 503.044                        | 69.876              |                       |                           | 69.876                     | 62.377456   | 1.4                    |                           | 63.777456                             | 6.10                               |                      |                                         | 3                           | 3                                         | 5                         | Wang Dezhong                            | 3                    |                  |                |                |  |  |
| 10               | 1979 | Wang Zuoxing                      | poor peasant         | 5              |                   |       | 42                            | 5827                   | 407                         | 6234               |                             | 6234                       |                              | 6234                        | 1428                        | 523.656                         |                                      | 1951.656                | 1951.656                       | 224.424             |                       |                           | 224.424                    | 242.00534   | 7                      |                           | 249.00534                             | -24.58                             |                      | 10.5                                    | 2                           | 3                                         | 5                         | Wang Dezhong                            | 3                    |                  |                |                |  |  |
| 11               | 1979 | Wang Zuoqi                        | poor peasant         | 5              |                   |       | 48                            | 8217                   | 1165                        | 9382               |                             | 9382                       |                              | 9382                        | 1632                        | 788.088                         |                                      | 2420.088                | 2420.088                       | 337.752             |                       | 28.4                      | 366.152                    | 300.09091   | 7                      |                           | 307.09091                             | 59.06                              |                      |                                         | 2                           | 3                                         | 5                         | Wang Dezhong                            | 3                    |                  |                |                |  |  |
| 12               | 1979 | Kaiying's mother                  | poor peasant         | 1              |                   |       | 10                            | 1700                   | 0                           | 1700               |                             | 1700                       |                              | 1700                        | 340                         | 142.8                           |                                      | 482.8                   | 482.8                          | 61.2                |                       |                           | 61.2                       | 59.8672     | 1.4                    |                           | 61.2672                               | -0.07                              |                      | 0.07                                    | 2                           | 3                                         | 5                         | Wang Dezhong                            | 3                    |                  |                |                |  |  |
| 14               | 1979 | Feng Kailing                      | landlord             | 2              |                   |       | 20                            | 4157                   | 178                         | 4335               |                             | 4335                       |                              | 4335                        | 680                         | 364.14                          |                                      | 1044.14                 | 1044.14                        | 156.06              |                       |                           | 156.06                     | 129.47336   | 2.8                    |                           | 132.27336                             | 23.79                              |                      |                                         | 3                           | 1                                         | 5                         | Wang Dezhong                            | 3                    |                  |                |                |  |  |
| 15               | 1979 | Feng Huazhong                     | landlord             | 4              |                   |       | 40                            | 5708                   | 788                         | 6496               |                             | 6496                       |                              | 6496                        | 1360                        | 545.664                         |                                      | 1905.664                | 1905.664                       | 233.856             |                       |                           | 233.856                    | 236.30234   | 5.6                    |                           | 241.90234                             | -8.05                              |                      | 2                                       | 3                           | 1                                         | 5                         | Wang Dezhong                            | 3                    |                  |                |                |  |  |
| 16               | 1979 | Wang Sichun                       | poor peasant         | 4              |                   |       | 28                            | 4135                   | 80                          | 4215               |                             | 4215                       |                              | 4215                        | 952                         | 354.06                          |                                      | 1306.06                 | 1306.06                        | 151.74              |                       |                           | 151.74                     | 161.95144   | 5.6                    |                           | 167.55144                             | -15.81                             |                      | 7.8                                     | 3                           | 3                                         | 5                         | Wang Dezhong                            | 3                    |                  |                |                |  |  |
| 17               | 1979 | Chen Xuezhong                     | poor peasant         | 2              |                   |       | 20                            | 2875                   | 799                         | 3674               |                             | 3674                       |                              | 3674                        | 680                         | 308.616                         |                                      | 988.616                 | 988.616                        | 132.264             |                       |                           | 132.264                    | 122.58838   | 2.8                    |                           | 125.38838                             | 6.88                               |                      |                                         | 2                           | 3                                         | 5                         | Wang Dezhong                            | 3                    |                  |                |                |  |  |
| 18               | 1979 | Feng Baojin                       | poor peasant         | 3              |                   |       | 30                            | 9504                   | 739                         | 10243              |                             | 10243                      |                              | 10243                       | 1020                        | 860.412                         |                                      | 1880.412                | 1880.412                       | 368.748             |                       |                           | 368.748                    | 233.17109   | 4.2                    |                           | 237.37109                             | 131.38                             |                      |                                         | 2                           | 3                                         | 5                         | Wang Dezhong                            | 3                    |                  |                |                |  |  |
| 19               | 1979 | Feng Xianzhong                    | poor peasant         | 4              |                   |       | 36                            | 4033                   | 661                         | 4694               |                             | 4694                       |                              | 4694                        | 1224                        | 394.296                         | -40                                  | 1578.296                | 1578.296                       | 168.984             |                       |                           | 168.984                    | 195.7087    | 5.6                    |                           | 201.3087                              | -32.32                             |                      | 5.3                                     | 2                           | 3                                         | 5                         | Wang Dezhong                            | 3                    |                  |                |                |  |  |
| 20               | 1979 | Feng Kaiyuan                      | poor peasant         | 7              |                   |       | 70                            | 10463                  | 1234                        | 11697              |                             | 11697                      |                              | 11697                       | 2380                        | 982.548                         |                                      | 3362.548                | 3362.548                       | 421.092             |                       |                           | 421.092                    | 416.95595   | 9.8                    |                           | 426.75595                             | -5.66                              |                      | 1.7                                     | 3                           | 3                                         | 5                         | Wang Dezhong                            | 3                    |                  |                |                |  |  |
| 21               | 1979 | Feng Kaiwu                        | poor peasant         | 4              |                   |       | 40                            | 9911                   | 923                         | 10834              |                             | 10834                      |                              | 10834                       | 1360                        | 910.056                         |                                      | 2270.056                | 2270.056                       | 390.024             |                       |                           | 390.024                    | 281.48694   | 5.6                    |                           | 287.08694                             | 102.94                             |                      |                                         | 3                           | 3                                         | 5                         | Wang Dezhong                            | 3                    |                  |                |                |  |  |
| 22               | 1979 | Feng Kaiwen                       | poor peasant         | 6              |                   |       | 60                            | 7428                   | 720                         | 8148               |                             | 8148                       |                              | 8148                        | 2040                        | 684.432                         |                                      | 2724.432                | 2724.432                       | 293.328             |                       |                           | 293.328                    | 337.82957   | 8.4                    |                           | 346.22957                             | -52.90                             |                      | 10.9                                    | 2                           | 3                                         | 5                         | Wang Dezhong                            | 3                    |                  |                |                |  |  |
| 23               | 1979 | Kou Huaisheng                     | poor peasant         | 8              |                   |       | 78                            | 14489                  | 1535                        | 16024              |                             | 16024                      |                              | 16024                       | 2652                        | 1346.016                        |                                      | 3998.016                | 3998.016                       | 576.864             |                       |                           | 576.864                    | 495.75398   | 11.2                   |                           | 506.95398                             | 69.91                              |                      |                                         | 2                           | 3                                         | 5                         | Wang Dezhong                            | 3                    |                  |                |                |  |  |

(cont.)

| Household number | Year | Name of the head of the household | Family class status  | Family members | Family characters | Labor | Number of standard population | Work points settlement |                             |                    |                     |                    | Grain distribution  |                    |                             |                                 |                                      | Firewood distribution   | Work points income (Yuan)      |                     |                 |                  | Deducted amount (Yuan) |                        |                           |                               |                                    | Distribution results (Yuan) | Distribution results (Yuan)             |                                           |                           | Guanxi                                  |                      |                  |                |                |
|------------------|------|-----------------------------------|----------------------|----------------|-------------------|-------|-------------------------------|------------------------|-----------------------------|--------------------|---------------------|--------------------|---------------------|--------------------|-----------------------------|---------------------------------|--------------------------------------|-------------------------|--------------------------------|---------------------|-----------------|------------------|------------------------|------------------------|---------------------------|-------------------------------|------------------------------------|-----------------------------|-----------------------------------------|-------------------------------------------|---------------------------|-----------------------------------------|----------------------|------------------|----------------|----------------|
|                  |      |                                   |                      |                |                   |       |                               | Laboring work points   | Farmyard manure work points | Sum of work points | subsidy work points | Sum of work points | Subsidy work points | Sum of work points | Grain distribution: rations | Grain distribution: work points | Grain distribution: subsidized grain | Grain distribution: sum | Grain distribution: per capita | Income: work points | Income: welfare | Income: prepaied | Income: sum            | Deducted amount: grain | Deducted amount: firewood | Deducted amount: other things | Deducted amount: withdraw advances | Deducted amount: sum        | Distribution results: personal solution | Distribution results: collective solution | Distribution results: sum | Interpersonal relationship with leaders | Family class status2 | Number of leader | Name of leader | Term of office |
| 24               | 1979 | Anming's mother                   | landlord             | 1              |                   |       | 10                            | 676                    | 36                          | 712                |                     | 712                |                     | 712                | 340                         | 59.808                          |                                      | 399.808                 | 399.808                        |                     | 25.632          |                  |                        | 25.632                 | 49.576192                 | 1.4                           |                                    | 50.976192                   | -25.34                                  |                                           | 10.4                      | 2                                       | 1                    | 5                | Wang Dezhong   | 3              |
| 25               | 1979 | Wang Xiujuan                      | poor peasant         | 2              |                   |       | 20                            | 2258                   | 261                         | 2519               |                     | 2519               |                     | 2519               | 680                         | 211.596                         |                                      | 891.596                 | 891.596                        |                     | 90.684          |                  |                        | 90.684                 | 110.5579                  | 2.8                           |                                    | 113.3579                    | -22.67                                  |                                           | 12.67                     | 3                                       | 3                    | 5                | Wang Dezhong   | 3              |
| 26               | 1979 | Feng Zhaobu                       | middle-class peasant | 4              | worker            |       | 40                            | 2621                   | 0                           | 2621               |                     | 2621               | 4000                | 6621               | 1360                        | 556.164                         |                                      | 1916.164                | 1916.164                       |                     | 94.356          | 47               |                        | 141.356                | 237.60434                 | 5.6                           |                                    | 243.20434                   | -101.85                                 |                                           |                           | 2                                       | 2                    | 5                | Wang Dezhong   | 3              |
| 27               | 1979 | Feng Zhaohuan                     | middle-class peasant | 6              |                   |       | 60                            | 5185                   | 693                         | 5878               |                     | 5878               |                     | 5878               | 2040                        | 493.752                         |                                      | 2533.752                | 2533.752                       |                     | 211.608         |                  |                        | 211.608                | 314.18525                 | 8.4                           |                                    | 322.58525                   | -110.98                                 |                                           | 16                        | 3                                       | 2                    | 5                | Wang Dezhong   | 3              |
| 28               | 1979 | Zhaohuan's mother                 | middle-class peasant | 1              |                   |       | 10                            | 1600                   | 0                           | 1600               |                     | 1600               |                     | 1600               | 340                         | 134.4                           |                                      | 474.4                   | 474.4                          |                     | 57.6            |                  |                        | 57.6                   | 58.8256                   | 1.4                           |                                    | 60.2256                     | -2.63                                   |                                           | 1.1                       | 3                                       | 2                    | 5                | Wang Dezhong   | 3              |
| 29               | 1979 | Feng Kaijun                       | poor peasant         | 8              |                   |       | 80                            | 14742                  | 847                         | 15589              |                     | 15589              |                     | 15589              | 2720                        | 1309.476                        |                                      | 4029.476                | 4029.476                       |                     | 561.204         |                  |                        | 561.204                | 499.65502                 | 11.2                          |                                    | 510.85502                   | 50.35                                   |                                           |                           | 2                                       | 3                    | 5                | Wang Dezhong   | 3              |
| 30               | 1979 | Feng Kaizheng                     | poor peasant         | 8              |                   |       | 80                            | 15045                  | 1393                        | 16438              |                     | 16438              |                     | 16438              | 2720                        | 1380.792                        |                                      | 4100.792                | 4100.792                       |                     | 591.768         |                  |                        | 591.768                | 508.49821                 | 11.2                          |                                    | 519.69821                   | 72.07                                   |                                           |                           | 3                                       | 3                    | 5                | Wang Dezhong   | 3              |
| 31               | 1979 | Feng Zhaoxin                      | poor peasant         | 5              |                   |       | 50                            | 9103                   | 672                         | 9775               |                     | 9775               |                     | 9775               | 1700                        | 821.1                           |                                      | 2521.1                  | 2521.1                         |                     | 351.9           |                  |                        | 351.9                  | 312.6164                  | 7                             |                                    | 319.6164                    | 32.28                                   |                                           |                           | 3                                       | 3                    | 5                | Wang Dezhong   | 3              |
| 32               | 1979 | Wang Xiangyun                     | middle-class peasant | 1              |                   |       | 10                            | 0                      | 2043                        | 2043               |                     | 2043               |                     | 2043               | 340                         | 171.612                         |                                      | 511.612                 | 511.612                        |                     | 73.548          |                  | 9.2                    | 82.748                 | 63.439888                 | 1.4                           |                                    | 64.839888                   | 17.91                                   |                                           |                           | 3                                       | 2                    | 5                | Wang Dezhong   | 3              |
| 33               | 1979 | Wang Xuewen                       | middle-class peasant | 3              |                   |       | 30                            | 5453                   | 313                         | 5766               |                     | 5766               |                     | 5766               | 1020                        | 484.344                         |                                      | 1504.344                | 1504.344                       |                     | 207.576         |                  |                        | 207.576                | 186.53866                 | 4.2                           |                                    | 190.73866                   | 16.84                                   |                                           |                           | 3                                       | 2                    | 5                | Wang Dezhong   | 3              |
| 34               | 1979 | Feng Xianmin                      | middle-class peasant | 3              |                   |       | 30                            | 7811                   | 289                         | 8100               |                     | 8100               |                     | 8100               | 1020                        | 680.4                           |                                      | 1700.4                  | 1700.4                         |                     | 291.6           |                  |                        | 291.6                  | 210.8496                  | 4.2                           |                                    | 215.0496                    | 76.55                                   |                                           |                           | 2                                       | 2                    | 5                | Wang Dezhong   | 3              |
| 35               | 1979 | Feng Xianhua                      | middle-class peasant | 3              |                   |       | 30                            | 5690                   | 687                         | 6377               |                     | 6377               |                     | 6377               | 1020                        | 535.668                         |                                      | 1555.668                | 1555.668                       |                     | 229.572         |                  |                        | 229.572                | 192.90283                 | 4.2                           |                                    | 197.10283                   | 32.47                                   |                                           |                           | 2                                       | 2                    | 5                | Wang Dezhong   | 3              |
| 36               | 1979 | Feng Xiaoxi                       | middle-class peasant | 4              |                   |       | 40                            | 9830                   | 360                         | 10190              |                     | 10190              |                     | 10190              | 1360                        | 855.96                          | -36                                  | 2179.96                 | 2179.96                        |                     | 366.84          |                  |                        | 366.84                 | 270.31504                 | 5.6                           |                                    | 275.91504                   | 90.92                                   |                                           |                           | 3                                       | 2                    | 5                | Wang Dezhong   | 3              |
| 37               | 1979 | Feng Xiangui                      | middle-class peasant | 7              |                   |       | 70                            | 7899                   | 784                         | 8683               |                     | 8683               |                     | 8683               | 2380                        | 729.372                         |                                      | 3109.372                | 3109.372                       |                     | 312.588         |                  |                        | 312.588                | 385.56213                 | 9.8                           |                                    | 395.36213                   | -82.77                                  |                                           | 19.7                      | 2                                       | 2                    | 5                | Wang Dezhong   | 3              |
| 38               | 1979 | Feng Xianzhen                     | middle-class peasant | 5              |                   |       | 50                            | 8794                   | 585                         | 9379               |                     | 9379               |                     | 9379               | 1700                        | 787.836                         |                                      | 2487.836                | 2487.836                       |                     | 337.644         |                  |                        | 337.644                | 308.49166                 | 7                             |                                    | 315.49166                   | 22.15                                   |                                           |                           | 2                                       | 2                    | 5                | Wang Dezhong   | 3              |
| 39               | 1979 | Feng Xianxue                      | middle-class peasant | 5              |                   |       | 46                            | 6549                   | 758                         | 7307               | 500                 | 7807               |                     | 7807               | 1564                        | 655.788                         |                                      | 2219.788                | 2219.788                       |                     | 281.052         |                  | 11.5                   | 292.552                | 275.25371                 | 7                             |                                    | 282.25371                   | 10.30                                   |                                           |                           | 1                                       | 2                    | 5                | Wang Dezhong   | 3              |
| 40               | 1979 | Wang Tingpin                      | poor peasant         | 2              |                   |       | 20                            | 2737                   | 344                         | 3081               |                     | 3081               |                     | 3081               | 680                         | 258.804                         |                                      | 938.804                 | 938.804                        |                     | 110.916         |                  |                        | 110.916                | 116.4117                  | 2.8                           |                                    | 119.2117                    | -8.30                                   |                                           | 3.3                       | 1                                       | 3                    | 5                | Wang Dezhong   | 3              |
| 41               | 1979 | Wang Zhengfen                     | middle-class peasant | 2              |                   |       | 20                            | 4055                   | 113                         | 4168               |                     | 4168               |                     | 4168               | 680                         | 350.112                         |                                      | 1030.112                | 1030.112                       |                     | 150.048         |                  |                        | 150.048                | 127.73389                 | 2.8                           |                                    | 130.53389                   | 19.51                                   |                                           |                           | 1                                       | 2                    | 5                | Wang Dezhong   | 3              |

(cont.)

| Household number | Year | Name of the head of the household | Family class status  | Family members | Family characters | Labor | Number of standard population | Work points settlement |                             |                    |                             |                            | Grain distribution           |                             |                             |                                 |                                      | Firewood distribution | Work points income (Yuan) |                                |                     |                         | Deducted amount (Yuan)     |             |                        |                           |                                       | Distribution results (Yuan) | Distribution results (Yuan)        |                      |                                         | Guanxi                                    |                           |                                         |                                  |                  |                |
|------------------|------|-----------------------------------|----------------------|----------------|-------------------|-------|-------------------------------|------------------------|-----------------------------|--------------------|-----------------------------|----------------------------|------------------------------|-----------------------------|-----------------------------|---------------------------------|--------------------------------------|-----------------------|---------------------------|--------------------------------|---------------------|-------------------------|----------------------------|-------------|------------------------|---------------------------|---------------------------------------|-----------------------------|------------------------------------|----------------------|-----------------------------------------|-------------------------------------------|---------------------------|-----------------------------------------|----------------------------------|------------------|----------------|
|                  |      |                                   |                      |                |                   |       |                               | Laboring work points   | Farmyard manure work points | Sum of work points | subsidy work points by cash | Sum of work points by cash | Subsidy work points by grain | Sum of work points by grain | Grain distribution: rations | Grain distribution: work points | Grain distribution: subsidized grain |                       | Grain distribution: sum   | Grain distribution: per capita | Income: work points | Income: welfare subsidy | Income: prepaied overdraft | Income: sum | Deducted amount: grain | Deducted amount: firewood | Deducted amount: other things in kind |                             | Deducted amount: withdraw advances | Deducted amount: sum | Distribution results: personal solution | Distribution results: collective solution | Distribution results: sum | Interpersonal relationship with leaders | Family class status <sup>2</sup> | Number of leader | Name of leader |
| 42               | 1979 | Wu Zongxiu                        | middle-class peasant | 1              |                   |       | 10                            | 1812                   | 360                         | 2172               |                             | 2172                       |                              | 2172                        | 340                         | 182.448                         |                                      | 522.448               | 522.448                   |                                | 78.192              |                         |                            | 78.192      | 64.783552              |                           | 1.4                                   |                             | 66.183552                          | 12.01                |                                         | 3                                         | 2                         | 5                                       | Wang Dezhong                     | 3                |                |
| 43               | 1979 | Wang Depo                         | poor peasant         | 6              |                   |       | 60                            | 7910                   | 690                         | 8600               |                             | 8600                       |                              | 8600                        | 2040                        | 722.4                           |                                      | 2762.4                | 2762.4                    |                                | 309.6               |                         |                            | 309.6       | 342.5376               |                           | 8.4                                   |                             | 350.9376                           | -41.34               |                                         | 11.3                                      | 1                         | 3                                       | 5                                | Wang Dezhong     | 3              |
| 44               | 1979 | Wang Dexue                        | poor peasant         | 2              |                   |       | 20                            | 2846                   | 0                           | 2846               |                             | 2846                       |                              | 2846                        | 680                         | 239.064                         |                                      | 919.064               | 919.064                   |                                | 102.456             |                         |                            | 102.456     | 113.96394              |                           | 2.8                                   |                             | 116.76394                          | -14.31               |                                         | 4.3                                       | 1                         | 3                                       | 5                                | Wang Dezhong     | 3              |
| 45               | 1979 | Wang Dekuan                       | poor peasant         | 3              |                   |       | 30                            | 3893                   | 220                         | 4113               |                             | 4113                       |                              | 4113                        | 1020                        | 345.492                         |                                      | 1365.492              | 1365.492                  |                                | 148.068             |                         |                            | 148.068     | 169.32101              |                           | 4.2                                   |                             | 173.52101                          | -25.45               |                                         | 8.4                                       | 1                         | 3                                       | 5                                | Wang Dezhong     | 3              |
| 46               | 1979 | Wang Tingzhen                     | poor peasant         | 7              |                   |       | 70                            | 5013                   | 575                         | 5588               | 5500                        | 11088                      |                              | 11088                       | 2380                        | 931.392                         |                                      | 3311.392              | 3311.392                  |                                | 399.168             |                         |                            | 399.168     | 410.61261              |                           | 9.8                                   |                             | 420.41261                          | -21.24               |                                         | 11.24                                     | 1                         | 3                                       | 5                                | Wang Dezhong     | 3              |
| 47               | 1979 | Wang Tingjian                     | poor peasant         | 3              |                   |       | 30                            | 5129                   | 292                         | 5421               |                             | 5421                       |                              | 5421                        | 1020                        | 455.364                         |                                      | 1475.364              | 1475.364                  |                                | 195.156             |                         |                            | 195.156     | 182.94514              |                           | 4.2                                   |                             | 187.14514                          | 8.01                 |                                         |                                           | 1                         | 3                                       | 5                                | Wang Dezhong     | 3              |
| 48               | 1979 | Wang Zhengcai                     | poor peasant         | 6              |                   |       | 60                            | 11028                  | 765                         | 11793              |                             | 11793                      |                              | 11793                       | 2040                        | 990.612                         |                                      | 3030.612              | 3030.612                  |                                | 424.548             |                         |                            | 424.548     | 375.79589              |                           | 8.4                                   |                             | 384.19589                          | 40.35                |                                         |                                           | 2                         | 3                                       | 5                                | Wang Dezhong     | 3              |
| 49               | 1979 | Wang Zhengxuan                    | poor peasant         | 5              |                   |       | 50                            | 7423                   | 354                         | 7777               | 1000                        | 8777                       |                              | 8777                        | 1700                        | 737.268                         |                                      | 2437.268              | 2437.268                  |                                | 315.972             |                         |                            | 315.972     | 302.22123              |                           | 7                                     |                             | 309.22123                          | 6.75                 |                                         |                                           | 2                         | 3                                       | 5                                | Wang Dezhong     | 3              |
| 50               | 1979 | Shengyu's mother                  | poor peasant         | 2              |                   |       | 16                            | 1558                   | 177                         | 1735               |                             | 1735                       | 1000                         | 2735                        | 544                         | 229.74                          |                                      | 773.74                | 773.74                    |                                | 62.46               |                         |                            | 62.46       | 95.94376               |                           | 2.8                                   |                             | 98.74376                           | -36.28               |                                         |                                           | 2                         | 3                                       | 5                                | Wang Dezhong     | 3              |
| 51               | 1979 | Chao Shengyu                      | poor peasant         | 3              | worker            |       | 22                            | 1347                   | 276                         | 1623               |                             | 1623                       | 2000                         | 3623                        | 748                         | 304.332                         |                                      | 1052.332              | 1052.332                  |                                | 58.428              |                         |                            | 58.428      | 130.48917              |                           | 4.2                                   |                             | 134.68917                          | -76.26               |                                         |                                           | 2                         | 3                                       | 5                                | Wang Dezhong     | 3              |
| 52               | 1979 | Wang Zhengyan                     | poor peasant         | 2              |                   |       | 20                            | 4673                   | 299                         | 4972               |                             | 4972                       |                              | 4972                        | 680                         | 417.648                         |                                      | 1097.648              | 1097.648                  |                                | 178.992             |                         |                            | 178.992     | 136.10835              |                           | 2.8                                   |                             | 138.90835                          | 40.08                |                                         |                                           | 3                         | 3                                       | 5                                | Wang Dezhong     | 3              |
| 54               | 1979 | Wang Zhenggui                     | poor peasant         | 3              |                   |       | 30                            | 2641                   | 1242                        | 3883               | 1000                        | 4883                       |                              | 4883                        | 1020                        | 410.172                         |                                      | 1430.172              | 1430.172                  |                                | 175.788             |                         |                            | 175.788     | 177.34133              |                           | 4.2                                   |                             | 181.54133                          | -5.75                |                                         | 5.75                                      | 3                         | 3                                       | 5                                | Wang Dezhong     | 3              |
| 56               | 1979 | Wang Deshan                       | poor peasant         | 5              |                   |       | 50                            | 6914                   | 828                         | 7742               |                             | 7742                       |                              | 7742                        | 1700                        | 650.328                         |                                      | 2350.328              | 2350.328                  |                                | 278.712             |                         |                            | 278.712     | 291.44067              |                           | 7                                     |                             | 298.44067                          | -19.73               |                                         | 4.7                                       | 2                         | 3                                       | 5                                | Wang Dezhong     | 3              |
| 57               | 1979 | Wang Deling                       | poor peasant         | 6              |                   |       | 58                            | 5874                   | 566                         | 6440               |                             | 6440                       |                              | 6440                        | 1972                        | 540.96                          |                                      | 2512.96               | 2512.96                   |                                | 231.84              |                         |                            | 231.84      | 311.60704              |                           | 8.4                                   |                             | 320.00704                          | -88.17               |                                         | 20.2                                      | 2                         | 3                                       | 5                                | Wang Dezhong     | 3              |
| 60               | 1979 | Feng Zhaoyuan                     | poor peasant         | 1              |                   |       | 10                            | 1870                   | 0                           | 1870               |                             | 1870                       |                              | 1870                        | 340                         | 157.08                          |                                      | 497.08                | 497.08                    |                                | 67.32               |                         |                            | 67.32       | 61.63792               |                           | 1.4                                   |                             | 63.03792                           | 4.28                 |                                         |                                           | 3                         | 3                                       | 5                                | Wang Dezhong     | 3              |
| 61               | 1979 | Ge Zhengxian                      | poor peasant         | 1              |                   |       | 10                            | 1870                   | 0                           | 1870               |                             | 1870                       |                              | 1870                        | 340                         | 157.08                          |                                      | 497.08                | 497.08                    |                                | 67.32               |                         |                            | 67.32       | 61.63792               |                           | 1.4                                   |                             | 63.03792                           | 4.28                 |                                         |                                           | 3                         | 3                                       | 5                                | Wang Dezhong     | 3              |
| 68               | 1979 | Ma Lianjun                        | middle-class peasant | 9              |                   |       | 90                            | 12296                  | 1056                        | 13352              |                             | 13352                      |                              | 13352                       | 3060                        | 1121.568                        |                                      | 4181.568              | 4181.568                  |                                | 480.672             |                         |                            | 480.672     | 518.51443              |                           | 12.6                                  |                             | 531.11443                          | -50.44               |                                         | 10                                        | 3                         | 2                                       | 5                                | Wang Dezhong     | 3              |
| 69               | 1979 | Feng Xiaolou                      | landlord             | 1              |                   |       | 10                            | 4339                   | 0                           | 4339               |                             | 4339                       |                              | 4339                        | 340                         | 364.476                         |                                      | 704.476               | 704.476                   |                                | 156.204             |                         |                            | 156.204     | 87.355024              |                           | 1.4                                   |                             | 88.755024                          | 67.45                |                                         |                                           | 3                         | 1                                       | 5                                | Wang Dezhong     | 3              |
| 77               | 1979 | Chen Huixing                      | poor peasant         | 2              |                   |       | 20                            | 3650                   | 367                         | 4017               |                             | 4017                       |                              | 4017                        | 680                         | 337.428                         |                                      | 1017.428              | 1017.428                  |                                | 144.612             |                         |                            | 144.612     | 126.16107              |                           | 2.8                                   |                             | 128.96107                          | 15.65                |                                         |                                           | 2                         | 3                                       | 5                                | Wang Dezhong     | 3              |
| 100              | 1979 | Deshan's mother                   | poor peasant         | 1              |                   |       | 10                            | 0                      | 0                           | 0                  |                             | 0                          |                              | 0                           | 340                         | 0                               |                                      | 340                   | 340                       |                                | 0                   |                         |                            | 0           | 42.16                  |                           | 1.4                                   |                             | 43.56                              | -43.56               |                                         | 13.6                                      | 2                         | 3                                       | 5                                | Wang Dezhong     | 3              |
| 218              | 1979 | Feng Zhaoqian                     | poor peasant         | 5              |                   |       | 46                            | 6044                   | 749                         | 6793               | 150                         | 6943                       |                              | 6943                        | 1564                        | 583.212                         |                                      | 2147.212              | 2147.212                  |                                | 249.948             |                         | 9.2                        | 259.148     | 266.25429              |                           | 7                                     |                             | 273.25429                          | -14.11               |                                         | 2                                         | 2                         | 3                                       | 5                                | Wang Dezhong     | 3              |
| 308              | 1979 | Feng Zhaobin                      | poor peasant         | 3              |                   |       | 24                            | 4322                   | 900                         | 5222               |                             | 5222                       |                              | 5222                        | 816                         | 438.648                         | -27                                  | 1227.648              | 1227.648                  |                                | 187.992             |                         |                            | 187.992     | 152.22835              |                           | 4.2                                   |                             | 156.42835                          | 31.56                |                                         |                                           | 2                         | 3                                       | 5                                | Wang Dezhong     | 3              |
| 318              | 1979 | Feng Xianbao                      | poor peasant         | 4              |                   |       | 32                            | 4388                   | 1010                        | 5398               |                             | 5398                       |                              | 5398                        | 1088                        | 453.432                         |                                      | 1541.432              | 1541.432                  |                                | 194.328             |                         |                            | 194.328     | 191.13757              |                           | 5.6                                   |                             | 196.73757                          | -2.41                |                                         | 0.9                                       | 2                         | 3                                       | 5                                | Wang Dezhong     | 3              |
| 3281             | 1979 | Wang Like                         | middle-class peasant | 3              |                   |       | 24                            | 5132                   | 1184                        | 6316               |                             | 6316                       |                              | 6316                        | 816                         | 530.544                         |                                      | 1346.544              | 1346.544                  |                                | 227.376             |                         |                            | 227.376     | 166.97146              |                           | 4.2                                   |                             | 171.17146                          | 56.20                |                                         |                                           | 2                         | 2                                       | 5                                | Wang Dezhong     | 3              |
| 3282             | 1979 | Wang Liju                         | middle-class peasant | 4              |                   |       | 40                            | 6699                   | 902                         | 7601               |                             | 7601                       |                              | 7601                        | 1360                        | 638.484                         |                                      | 1998.484              | 1998.484                  |                                | 273.636             |                         |                            | 273.636     | 247.81202              |                           | 5.6                                   |                             | 253.41202                          | 20.22                |                                         |                                           | 2                         | 2                                       | 5                                | Wang Dezhong     | 3              |
| 4781             | 1979 | Wang Dezhong                      | middle-class peasant | 4              |                   |       | 34                            | 5650                   | 563                         | 6213               | 150                         | 6363                       |                              | 6363                        | 1156                        | 534.492                         |                                      | 1690.492              | 1690.492                  |                                | 229.068             |                         |                            | 229.068     | 209.62101              |                           | 5.6                                   |                             | 215.22101                          | 13.85                |                                         |                                           | 1                         | 2                                       | 5                                | Wang Dezhong     | 3              |



(cont.)

| Household number | Year | Name of the head of the household | Family class status  | Family members | Family characters | Labor | Number of standard population | Work points settlement |                             |                    |                             |                            | Grain distribution           |                             |                             |                                 |                                      | Firewood distribution   | Work points income (Yuan)      |                     |                         |                            | Deducted amount (Yuan) |                        |                           |                                       |                                    | Distribution results (Yuan) | Distribution results (Yuan)             |                                           |                           | Guanxi                                  |                      |                  |                |                |
|------------------|------|-----------------------------------|----------------------|----------------|-------------------|-------|-------------------------------|------------------------|-----------------------------|--------------------|-----------------------------|----------------------------|------------------------------|-----------------------------|-----------------------------|---------------------------------|--------------------------------------|-------------------------|--------------------------------|---------------------|-------------------------|----------------------------|------------------------|------------------------|---------------------------|---------------------------------------|------------------------------------|-----------------------------|-----------------------------------------|-------------------------------------------|---------------------------|-----------------------------------------|----------------------|------------------|----------------|----------------|
|                  |      |                                   |                      |                |                   |       |                               | Laboring work points   | Farmyard manure work points | Sum of work points | subsidy work points by cash | Sum of work points by cash | Subsidy work points by grain | Sum of work points by grain | Grain distribution: rations | Grain distribution: work points | Grain distribution: subsidized grain | Grain distribution: sum | Grain distribution: per capita | Income: work points | Income: welfare subsidy | Income: prepaied overdraft | Income: sum            | Deducted amount: grain | Deducted amount: firewood | Deducted amount: other things in kind | Deducted amount: withdraw advances | Deducted amount: sum        | Distribution results: personal solution | Distribution results: collective solution | Distribution results: sum | Interpersonal relationship with leaders | Family class status2 | Number of leader | Name of leader | Term of office |
| 47s2             | 1979 | Wang Deqiang                      | middle-class peasant | 3              |                   |       | 24                            | 5864                   | 247                         | 6111               |                             | 6111                       |                              | 6111                        | 816                         | 513.324                         |                                      | 1329.324                | 1329.324                       |                     | 219.996                 |                            |                        | 219.996                | 164.83618                 |                                       | 4.2                                |                             | 169.03618                               | 50.96                                     |                           | 2                                       | 2                    | 5                | Wang Dezhong   | 3              |
| 48s              | 1979 | Wang Jiaxun                       | poor peasant         | 4              |                   |       | 32                            | 6202                   | 920                         | 7122               |                             | 7122                       |                              | 7122                        | 1088                        | 598.248                         |                                      | 1686.248                | 1686.248                       |                     | 256.392                 |                            |                        | 256.392                | 209.09475                 |                                       | 5.6                                |                             | 214.69475                               | 41.70                                     |                           | 2                                       | 3                    | 5                | Wang Dezhong   | 3              |
| 1                | 1980 | Ma Zhenqi                         | middle-class peasant | 1              |                   |       | 10                            | 8                      | 504                         | 512                |                             | 512                        |                              | 512                         | 370                         | 59.904                          |                                      | 429.904                 | 429.904                        |                     | 23.04                   |                            |                        | 23.04                  | 50.3                      |                                       | 0.8                                |                             | 51.1                                    | -28.06                                    |                           | 3                                       | 2                    | 5                | Wang Dezhong   | 3              |
| 2                | 1980 | Wang Xinming                      | middle-class peasant | 7              |                   |       | 70                            | 6609                   | 1438                        | 8047               |                             | 8047                       |                              | 8047                        | 2590                        | 941.499                         |                                      | 3531.499                | 3531.499                       |                     | 362.115                 | 20                         |                        | 382.115                | 413.1                     |                                       | 5.6                                |                             | 418.7                                   | -36.59                                    |                           | 2                                       | 2                    | 5                | Wang Dezhong   | 3              |
| 3                | 1980 | Feng Kaiying                      | poor peasant         | 7              |                   |       | 58                            | 6823                   | 617                         | 7440               |                             | 7440                       |                              | 7440                        | 2146                        | 870.48                          |                                      | 3016.48                 | 3016.48                        |                     | 334.8                   |                            |                        | 334.8                  | 352.9                     |                                       | 5.6                                |                             | 358.5                                   | -23.70                                    |                           | 3                                       | 3                    | 5                | Wang Dezhong   | 3              |
| 4                | 1980 | Wang Zuopeng                      | poor peasant         | 2              |                   |       | 20                            | 3606                   | 387                         | 3993               |                             | 3993                       |                              | 3993                        | 740                         | 467.181                         |                                      | 1207.181                | 1207.181                       |                     | 179.685                 |                            |                        | 179.685                | 141.2                     |                                       | 1.6                                |                             | 142.8                                   | 36.89                                     |                           | 3                                       | 3                    | 5                | Wang Dezhong   | 3              |
| 5                | 1980 | Wang Zuoliang                     | poor peasant         | 5              |                   |       | 50                            | 6394                   | 1575                        | 7969               |                             | 7969                       |                              | 7969                        | 1850                        | 932.373                         |                                      | 2782.373                | 2782.373                       |                     | 358.605                 |                            |                        | 358.605                | 325.5                     |                                       | 4                                  |                             | 329.5                                   | 29.11                                     |                           | 2                                       | 3                    | 5                | Wang Dezhong   | 3              |
| 6                | 1980 | Wang Tingmei                      | poor peasant         | 7              |                   |       | 68                            | 7561                   | 2471                        | 10032              |                             | 10032                      |                              | 10032                       | 2516                        | 1173.744                        |                                      | 3689.744                | 3689.744                       |                     | 451.44                  |                            |                        | 451.44                 | 431.7                     |                                       | 5.6                                |                             | 437.3                                   | 14.14                                     |                           | 2                                       | 3                    | 5                | Wang Dezhong   | 3              |
| 7                | 1980 | Wang Tingxi                       | poor peasant         | 4              | worker            |       | 38                            | 1601                   | 475                         | 2076               |                             | 2076                       | 3600                         | 5676                        | 1406                        | 664.092                         |                                      | 2070.092                | 2070.092                       |                     | 93.42                   | 20                         |                        | 113.42                 | 242.2                     |                                       | 3.2                                |                             | 245.4                                   | -131.98                                   |                           | 2                                       | 3                    | 5                | Wang Dezhong   | 3              |
| 9                | 1980 | Wang Tingzhi                      | poor peasant         | 1              |                   |       | 10                            | 175                    | 1013                        | 1188               |                             | 1188                       |                              | 1188                        | 370                         | 138.996                         |                                      | 508.996                 | 508.996                        |                     | 53.46                   |                            |                        | 53.46                  | 59.6                      |                                       | 0.8                                |                             | 60.4                                    | -6.94                                     |                           | 3                                       | 3                    | 5                | Wang Dezhong   | 3              |
| 10               | 1980 | Wang Zuoxing                      | poor peasant         | 5              |                   |       | 44                            | 4707                   | 224                         | 4931               |                             | 4931                       |                              | 4931                        | 1628                        | 576.927                         |                                      | 2204.927                | 2204.927                       |                     | 221.895                 |                            |                        | 221.895                | 258                       |                                       | 4                                  |                             | 262                                     | -40.11                                    |                           | 2                                       | 3                    | 5                | Wang Dezhong   | 3              |
| 11               | 1980 | Wang Zuoqi                        | poor peasant         | 5              |                   |       | 48                            | 6004                   | 1603                        | 7607               |                             | 7607                       |                              | 7607                        | 1776                        | 890.019                         |                                      | 2666.019                | 2666.019                       |                     | 342.315                 |                            |                        | 342.315                | 311.9                     |                                       | 4                                  |                             | 315.9                                   | 26.42                                     |                           | 2                                       | 3                    | 5                | Wang Dezhong   | 3              |
| 12               | 1980 | Kaiying's mother                  | poor peasant         | 1              |                   |       | 10                            | 0                      | 0                           | 0                  |                             | 0                          |                              | 0                           | 370                         | 0                               |                                      | 370                     | 370                            |                     | 0                       |                            |                        | 0                      | 43.3                      |                                       | 0.8                                |                             | 44.1                                    | -44.10                                    |                           | 2                                       | 3                    | 5                | Wang Dezhong   | 3              |
| 14               | 1980 | Feng Kailing                      | landlord             | 2              |                   |       | 20                            | 3275                   | 151                         | 3426               |                             | 3426                       |                              | 3426                        | 740                         | 400.842                         |                                      | 1140.842                | 1140.842                       |                     | 154.17                  |                            |                        | 154.17                 | 133.5                     |                                       | 1.6                                |                             | 135.1                                   | 19.07                                     |                           | 3                                       | 1                    | 5                | Wang Dezhong   | 3              |
| 15               | 1980 | Feng Huazhong                     | landlord             | 3              |                   |       | 30                            | 2750                   | 918                         | 3668               |                             | 3668                       |                              | 3668                        | 1110                        | 429.156                         |                                      | 1539.156                | 1539.156                       |                     | 165.06                  |                            |                        | 165.06                 | 180.1                     |                                       | 2.4                                |                             | 182.5                                   | -17.44                                    |                           | 3                                       | 1                    | 5                | Wang Dezhong   | 3              |
| 16               | 1980 | Wang Sichun                       | poor peasant         | 3              |                   |       | 30                            | 2513                   | 130                         | 2643               |                             | 2643                       |                              | 2643                        | 1110                        | 309.231                         |                                      | 1419.231                | 1419.231                       |                     | 118.935                 |                            |                        | 118.935                | 122.7                     |                                       | 2.4                                |                             | 125.1                                   | -6.17                                     |                           | 3                                       | 3                    | 5                | Wang Dezhong   | 3              |
| 17               | 1980 | Chen Xuezhong                     | poor peasant         | 2              |                   |       | 20                            | 1976                   | 992                         | 2968               |                             | 2968                       |                              | 2968                        | 740                         | 347.256                         |                                      | 1087.256                | 1087.256                       |                     | 133.56                  |                            |                        | 133.56                 | 127.2                     |                                       | 1.6                                |                             | 128.8                                   | 4.76                                      |                           | 2                                       | 3                    | 5                | Wang Dezhong   | 3              |
| 18               | 1980 | Feng Baojin                       | poor peasant         | 3              |                   |       | 30                            | 6104                   | 287                         | 6391               |                             | 6391                       |                              | 6391                        | 1110                        | 747.747                         |                                      | 1857.747                | 1857.747                       |                     | 287.595                 |                            |                        | 287.595                | 217.4                     |                                       | 2.4                                |                             | 219.8                                   | 67.80                                     |                           | 2                                       | 3                    | 5                | Wang Dezhong   | 3              |
| 19               | 1980 | Feng Xianzhong                    | poor peasant         | 4              |                   |       | 38                            | 2745                   | 823                         | 3568               |                             | 3568                       |                              | 3568                        | 1406                        | 417.456                         |                                      | 1823.456                | 1823.456                       |                     | 160.56                  |                            |                        | 160.56                 | 213.3                     |                                       | 3.2                                |                             | 216.5                                   | -55.94                                    |                           | 2                                       | 3                    | 5                | Wang Dezhong   | 3              |
| 20               | 1980 | Feng Kaiyuan                      | poor peasant         | 7              |                   |       | 70                            | 10887                  | 2217                        | 13104              |                             | 13104                      |                              | 13104                       | 2590                        | 1533.168                        |                                      | 4123.168                | 4123.168                       |                     | 589.68                  |                            |                        | 589.68                 | 482.4                     |                                       | 5.6                                |                             | 488                                     | 101.68                                    |                           | 3                                       | 3                    | 5                | Wang Dezhong   | 3              |
| 21               | 1980 | Feng Kaiwu                        | poor peasant         | 4              |                   |       | 40                            | 7392                   | 779                         | 8171               |                             | 8171                       |                              | 8171                        | 1480                        | 956.007                         |                                      | 2436.007                | 2436.007                       |                     | 367.695                 |                            |                        | 367.695                | 285                       |                                       | 3.2                                |                             | 288.2                                   | 79.50                                     |                           | 3                                       | 3                    | 5                | Wang Dezhong   | 3              |
| 22               | 1980 | Feng Kaiwen                       | poor peasant         | 6              |                   |       | 60                            | 7778                   | 726                         | 8504               |                             | 8504                       |                              | 8504                        | 2220                        | 994.968                         |                                      | 3214.968                | 3214.968                       |                     | 382.68                  |                            |                        | 382.68                 | 376.2                     |                                       | 4.8                                |                             | 381                                     | 1.68                                      |                           | 2                                       | 3                    | 5                | Wang Dezhong   | 3              |
| 23               | 1980 | Kou Huaisheng                     | poor peasant         | 8              |                   |       | 78                            | 13763                  | 788                         | 14551              |                             | 14551                      |                              | 14551                       | 2886                        | 1702.467                        |                                      | 4588.467                | 4588.467                       |                     | 654.795                 |                            |                        | 654.795                | 536.8                     |                                       | 6.4                                |                             | 543.2                                   | 111.60                                    |                           | 2                                       | 3                    | 5                | Wang Dezhong   | 3              |
| 24               | 1980 | Anming's mother                   | landlord             | 1              |                   |       | 10                            | 281                    | 15                          | 296                |                             | 296                        | 1200                         | 1496                        | 370                         | 175.032                         |                                      | 545.032                 | 545.032                        |                     | 13.32                   |                            |                        | 13.32                  | 63.8                      |                                       | 0.8                                |                             | 64.6                                    | -51.28                                    |                           | 2                                       | 1                    | 5                | Wang Dezhong   | 3              |
| 25               | 1980 | Xiuying's mother                  | poor peasant         | 1              |                   |       | 10                            | 5                      | 253                         | 258                |                             | 258                        | 1200                         | 1458                        | 370                         | 170.586                         |                                      | 540.586                 | 540.586                        |                     | 11.61                   |                            |                        | 11.61                  | 63.3                      |                                       | 0.8                                |                             | 64.1                                    | -52.49                                    |                           | 3                                       | 3                    | 5                | Wang Dezhong   | 3              |
| 26               | 1980 | Feng Zhaobu                       | middle-class peasant | 4              | worker            |       | 40                            | 200                    | 0                           | 200                |                             | 200                        | 5100                         | 5300                        | 1480                        | 620.1                           |                                      | 2100.1                  | 2100.1                         |                     | 9                       |                            |                        | 9                      | 245.7                     |                                       | 3.2                                |                             | 248.9                                   | -239.90                                   |                           | 2                                       | 2                    | 5                | Wang Dezhong   | 3              |

(cont.)

| Household number | Year | Name of the head of the household | Family class status  | Family members | Family characters | Labor | Number of standard population | Work points settlement |                             |                    |                             |                            | Grain distribution           |                             |                             |                                 |                                      | Firewood distribution | Work points income (Yuan) |                                |                     |                         | Deducted amount (Yuan)     |             |                        |                           |                                       | Distribution results (Yuan) | Distribution results (Yuan)        |                      |                                         |                                           | Guanxi                    |                                         |                      |                  |                |
|------------------|------|-----------------------------------|----------------------|----------------|-------------------|-------|-------------------------------|------------------------|-----------------------------|--------------------|-----------------------------|----------------------------|------------------------------|-----------------------------|-----------------------------|---------------------------------|--------------------------------------|-----------------------|---------------------------|--------------------------------|---------------------|-------------------------|----------------------------|-------------|------------------------|---------------------------|---------------------------------------|-----------------------------|------------------------------------|----------------------|-----------------------------------------|-------------------------------------------|---------------------------|-----------------------------------------|----------------------|------------------|----------------|
|                  |      |                                   |                      |                |                   |       |                               | Laboring work points   | Farmyard manure work points | Sum of work points | subsidy work points by cash | Sum of work points by cash | Subsidy work points by grain | Sum of work points by grain | Grain distribution: rations | Grain distribution: work points | Grain distribution: subsidized grain |                       | Grain distribution: sum   | Grain distribution: per capita | Income: work points | Income: welfare subsidy | Income: prepaied overdraft | Income: sum | Deducted amount: grain | Deducted amount: firewood | Deducted amount: other things in kind |                             | Deducted amount: withdraw advances | Deducted amount: sum | Distribution results: personal solution | Distribution results: collective solution | Distribution results: sum | Interpersonal relationship with leaders | Family class status2 | Number of leader | Name of leader |
| 27               | 1980 | Feng Zhaohuan                     | middle-class peasant | 6              |                   |       | 60                            | 6157                   | 738                         | 6895               |                             | 6895                       |                              | 6895                        | 2220                        | 806.715                         |                                      | 3026.715              | 3026.715                  |                                | 310.275             |                         |                            | 310.275     | 354                    |                           | 4.8                                   |                             | 358.8                              | -48.53               |                                         |                                           | 3                         | 2                                       | 5                    | Wang Dezhong     | 3              |
| 28               | 1980 | Zhaohuan's mother                 | middle-class peasant | 1              |                   |       | 10                            | 750                    | 0                           | 750                |                             | 750                        | 700                          | 1450                        | 370                         | 169.65                          |                                      | 539.65                | 539.65                    |                                | 33.75               |                         |                            | 33.75       | 63.2                   |                           | 0.8                                   |                             | 64                                 | -30.25               |                                         |                                           | 3                         | 2                                       | 5                    | Wang Dezhong     | 3              |
| 29               | 1980 | Feng Kaijun                       | poor peasant         | 8              |                   |       | 80                            | 12849                  | 1007                        | 13856              |                             | 13856                      |                              | 13856                       | 2960                        | 1621.152                        |                                      | 4581.152              | 4581.152                  |                                | 623.52              |                         |                            | 623.52      | 536                    |                           | 6.4                                   |                             | 542.4                              | 81.12                |                                         |                                           | 2                         | 3                                       | 5                    | Wang Dezhong     | 3              |
| 30               | 1980 | Feng Kaizheng                     | poor peasant         | 8              |                   |       | 80                            | 14496                  | 1396                        | 15892              |                             | 15892                      |                              | 15892                       | 2960                        | 1859.364                        |                                      | 4819.364              | 4819.364                  |                                | 715.14              |                         |                            | 715.14      | 563.8                  |                           | 6.4                                   |                             | 570.2                              | 144.94               |                                         |                                           | 3                         | 3                                       | 5                    | Wang Dezhong     | 3              |
| 31               | 1980 | Feng Zhaoxin                      | poor peasant         | 4              |                   |       | 44                            | 6466                   | 680                         | 7146               |                             | 7146                       |                              | 7146                        | 1628                        | 836.082                         |                                      | 2464.082              | 2464.082                  |                                | 321.57              |                         |                            | 321.57      | 288.3                  |                           | 3.2                                   |                             | 291.5                              | 30.07                |                                         |                                           | 3                         | 3                                       | 5                    | Wang Dezhong     | 3              |
| 32               | 1980 | Wang Xiangyun                     | middle-class peasant | 1              |                   |       | 10                            | 11                     | 928                         | 939                |                             | 939                        |                              | 939                         | 370                         | 109.863                         |                                      | 479.863               | 479.863                   |                                | 42.255              |                         |                            | 42.255      | 56.2                   |                           | 0.8                                   |                             | 57                                 | -14.75               |                                         |                                           | 3                         | 2                                       | 5                    | Wang Dezhong     | 3              |
| 33               | 1980 | Wang Xuewen                       | middle-class peasant | 3              |                   |       | 30                            | 3356                   | 243                         | 3599               |                             | 3599                       |                              | 3599                        | 1110                        | 421.083                         |                                      | 1531.083              | 1531.083                  |                                | 161.955             |                         |                            | 161.955     | 179.1                  |                           | 2.4                                   |                             | 181.5                              | -19.55               |                                         |                                           | 3                         | 2                                       | 5                    | Wang Dezhong     | 3              |
| 34               | 1980 | Feng Xianmin                      | middle-class peasant | 3              |                   |       | 30                            | 6740                   | 348                         | 7088               |                             | 7088                       |                              | 7088                        | 1110                        | 829.296                         |                                      | 1939.296              | 1939.296                  |                                | 318.96              |                         |                            | 318.96      | 226.9                  |                           | 2.4                                   |                             | 229.3                              | 89.66                |                                         |                                           | 2                         | 2                                       | 5                    | Wang Dezhong     | 3              |
| 35               | 1980 | Feng Xianhua                      | middle-class peasant | 2              |                   |       | 20                            | 3944                   | 409                         | 4353               |                             | 4353                       |                              | 4353                        | 740                         | 509.301                         |                                      | 1249.301              | 1249.301                  |                                | 195.885             |                         |                            | 195.885     | 146.1                  |                           | 1.6                                   |                             | 147.7                              | 48.19                |                                         |                                           | 2                         | 2                                       | 5                    | Wang Dezhong     | 3              |
| 36               | 1980 | Feng Xiaoxi                       | middle-class peasant | 4              |                   |       | 40                            | 9663                   | 521                         | 10184              |                             | 10184                      |                              | 10184                       | 1480                        | 1191.528                        |                                      | 2671.528              | 2671.528                  |                                | 458.28              |                         |                            | 458.28      | 312.6                  |                           | 3.2                                   |                             | 315.8                              | 142.48               |                                         |                                           | 3                         | 2                                       | 5                    | Wang Dezhong     | 3              |
| 37               | 1980 | Feng Xiangui                      | middle-class peasant | 7              |                   |       | 70                            | 9341                   | 900                         | 10241              |                             | 10241                      |                              | 10241                       | 2590                        | 1198.197                        |                                      | 3788.197              | 3788.197                  |                                | 460.845             |                         |                            | 460.845     | 443.2                  |                           | 5.6                                   |                             | 448.8                              | 12.05                |                                         |                                           | 2                         | 2                                       | 5                    | Wang Dezhong     | 3              |
| 38               | 1980 | Feng Xianzhen                     | middle-class peasant | 7              |                   |       | 64                            | 8632                   | 812                         | 9444               |                             | 9444                       |                              | 9444                        | 2368                        | 1104.948                        |                                      | 3472.948              | 3472.948                  |                                | 424.98              |                         |                            | 424.98      | 406.3                  |                           | 5.6                                   |                             | 411.9                              | 13.08                |                                         |                                           | 2                         | 2                                       | 5                    | Wang Dezhong     | 3              |
| 39               | 1980 | Feng Xianxue                      | middle-class peasant | 5              |                   |       | 46                            | 4923                   | 456                         | 5379               | 500                         | 5879                       |                              | 5879                        | 1702                        | 687.843                         |                                      | 2389.843              | 2389.843                  |                                | 264.555             |                         |                            | 264.555     | 279.6                  |                           | 4                                     |                             | 283.6                              | -19.05               |                                         |                                           | 1                         | 2                                       | 5                    | Wang Dezhong     | 3              |
| 40               | 1980 | Wang Tingpin                      | poor peasant         | 2              |                   |       | 20                            | 2549                   | 1141                        | 3690               |                             | 3690                       |                              | 3690                        | 740                         | 431.73                          |                                      | 1171.73               | 1171.73                   |                                | 166.05              |                         |                            | 166.05      | 137.1                  |                           | 1.6                                   |                             | 138.7                              | 27.35                |                                         |                                           | 1                         | 3                                       | 5                    | Wang Dezhong     | 3              |
| 41               | 1980 | Wang Zhengfen                     | middle-class peasant | 2              |                   |       | 20                            | 3510                   | 153                         | 3663               |                             | 3663                       |                              | 3663                        | 740                         | 428.571                         |                                      | 1168.571              | 1168.571                  |                                | 164.835             |                         |                            | 164.835     | 136.8                  |                           | 1.6                                   |                             | 138.4                              | 26.44                |                                         |                                           | 1                         | 2                                       | 5                    | Wang Dezhong     | 3              |
| 42               | 1980 | Wu Zongxiu                        | middle-class peasant | 1              |                   |       | 10                            | 878                    | 874                         | 1752               |                             | 1752                       |                              | 1752                        | 370                         | 204.984                         |                                      | 574.984               | 574.984                   |                                | 78.84               |                         |                            | 78.84       | 67.3                   |                           | 0.8                                   |                             | 68.1                               | 10.74                |                                         |                                           | 3                         | 2                                       | 5                    | Wang Dezhong     | 3              |
| 43               | 1980 | Wang Depo                         | poor peasant         | 5              |                   |       | 50                            | 2989                   | 402                         | 3391               | 3600                        | 6991                       |                              | 6991                        | 1850                        | 817.947                         |                                      | 2667.947              | 2667.947                  |                                | 314.595             |                         |                            | 314.595     | 312.2                  |                           | 4                                     |                             | 316.2                              | -1.61                |                                         |                                           | 1                         | 3                                       | 5                    | Wang Dezhong     | 3              |
| 44               | 1980 | Wang Dexue                        | poor peasant         | 2              |                   |       | 20                            | 2856                   | 0                           | 2856               |                             | 2856                       |                              | 2856                        | 740                         | 334.152                         |                                      | 1074.152              | 1074.152                  |                                | 128.52              |                         |                            | 128.52      | 125.7                  |                           | 1.6                                   |                             | 127.3                              | 1.22                 |                                         |                                           | 1                         | 3                                       | 5                    | Wang Dezhong     | 3              |
| 45               | 1980 | Wang Dekuan                       | poor peasant         | 3              |                   |       | 30                            | 3690                   | 218                         | 3908               |                             | 3908                       |                              | 3908                        | 1110                        | 457.236                         |                                      | 1567.236              | 1567.236                  |                                | 175.86              |                         |                            | 175.86      | 183.3                  |                           | 2.4                                   |                             | 185.7                              | -9.84                |                                         |                                           | 1                         | 3                                       | 5                    | Wang Dezhong     | 3              |

(cont.)

| Household number | Year | Name of the head of the household | Family class status  | Family members | Family characters | Labor | Number of standard population | Work points settlement |                             |                    |                             | Grain distribution         |                              |                             |                             |                                 | Firewood distribution | Work points income (Yuan)            |                         |                                |                     | Deducted amount (Yuan)  |                           |             |                        |                           | Distribution results (Yuan) | Distribution results (Yuan)           |                                    |                      |                                         | Guanxi                                    |                           |                                         |                      |                  |                |                |
|------------------|------|-----------------------------------|----------------------|----------------|-------------------|-------|-------------------------------|------------------------|-----------------------------|--------------------|-----------------------------|----------------------------|------------------------------|-----------------------------|-----------------------------|---------------------------------|-----------------------|--------------------------------------|-------------------------|--------------------------------|---------------------|-------------------------|---------------------------|-------------|------------------------|---------------------------|-----------------------------|---------------------------------------|------------------------------------|----------------------|-----------------------------------------|-------------------------------------------|---------------------------|-----------------------------------------|----------------------|------------------|----------------|----------------|
|                  |      |                                   |                      |                |                   |       |                               | Laboring work points   | Farmyard manure work points | Sum of work points | subsidy work points by cash | Sum of work points by cash | Subsidy work points by grain | Sum of work points by grain | Grain distribution: rations | Grain distribution: work points |                       | Grain distribution: subsidized grain | Grain distribution: sum | Grain distribution: per capita | Income: work points | Income: welfare subsidy | Income: prepaid overdraft | Income: sum | Deducted amount: grain | Deducted amount: firewood |                             | Deducted amount: other things in kind | Deducted amount: withdraw advances | Deducted amount: sum | Distribution results: personal solution | Distribution results: collective solution | Distribution results: sum | Interpersonal relationship with leaders | Family class status2 | Number of leader | Name of leader | Term of office |
|                  |      |                                   |                      |                |                   |       |                               |                        |                             |                    |                             |                            |                              |                             |                             |                                 |                       |                                      |                         |                                |                     |                         |                           |             |                        |                           |                             |                                       |                                    |                      |                                         |                                           |                           |                                         |                      |                  |                |                |
| 46               | 1980 | Wang Tingzhen                     | poor peasant         | 7              |                   |       | 70                            | 3069                   | 456                         | 3525               | 5500                        | 9025                       | 9025                         | 2590                        | 1055.925                    |                                 | 3645.925              | 3645.925                             |                         | 406.125                        |                     |                         | 406.125                   | 426.6       |                        | 5.6                       |                             | 432.2                                 | -26.08                             |                      | 1                                       | 3                                         | 5                         | Wang Dezhong                            | 3                    |                  |                |                |
| 47               | 1980 | Wang Tingjian                     | poor peasant         | 3              |                   |       | 30                            | 4643                   | 264                         | 4907               |                             | 4907                       | 4907                         | 1110                        | 574.119                     |                                 | 1684.119              | 1684.119                             |                         | 220.815                        |                     |                         | 220.815                   | 197         |                        | 2.4                       |                             | 199.4                                 | 21.42                              |                      | 1                                       | 3                                         | 5                         | Wang Dezhong                            | 3                    |                  |                |                |
| 48               | 1980 | Wang Zhengcai                     | poor peasant         | 6              |                   |       | 60                            | 8848                   | 894                         | 9742               |                             | 9742                       | 9742                         | 2220                        | 1139.814                    |                                 | 3359.814              | 3359.814                             |                         | 438.39                         |                     |                         | 438.39                    | 393.1       |                        | 4.8                       |                             | 397.9                                 | 40.49                              |                      | 2                                       | 3                                         | 5                         | Wang Dezhong                            | 3                    |                  |                |                |
| 49               | 1980 | Wang Zhengxuan                    | poor peasant         | 7              |                   |       | 64                            | 7866                   | 658                         | 8524               |                             | 8524                       | 8524                         | 2368                        | 997.308                     |                                 | 3365.308              | 3365.308                             |                         | 383.58                         |                     |                         | 383.58                    | 393.7       |                        | 5.6                       |                             | 399.3                                 | -15.72                             |                      | 2                                       | 3                                         | 5                         | Wang Dezhong                            | 3                    |                  |                |                |
| 50               | 1980 | Shengyu's mother                  | poor peasant         | 2              |                   |       | 18                            | 529                    | 2204                        | 2733               |                             | 2733                       | 1700                         | 4433                        | 666                         | 518.661                         |                       | 1184.661                             | 1184.661                |                                | 122.985             |                         |                           | 122.985     | 138.6                  |                           | 1.6                         |                                       | 140.2                              | -17.22               |                                         | 2                                         | 3                         | 5                                       | Wang Dezhong         | 3                |                |                |
| 51               | 1980 | Chao Shengyu                      | poor peasant         | 3              | worker            |       | 22                            | 1309                   | 273                         | 1582               |                             | 1582                       | 1500                         | 3082                        | 814                         | 360.594                         |                       | 1174.594                             | 1174.594                |                                | 71.19               | 60                      |                           | 131.19      | 137.5                  |                           | 2.4                         |                                       | 139.9                              | -8.71                |                                         | 2                                         | 3                         | 5                                       | Wang Dezhong         | 3                |                |                |
| 52               | 1980 | Wang Zhengyan                     | poor peasant         | 2              |                   |       | 20                            | 3260                   | 289                         | 3549               |                             | 3549                       |                              | 3549                        | 740                         | 415.233                         |                       | 1155.233                             | 1155.233                |                                | 159.705             |                         |                           | 159.705     | 135.1                  |                           | 1.6                         |                                       | 136.7                              | 23.01                |                                         | 3                                         | 3                         | 5                                       | Wang Dezhong         | 3                |                |                |
| 54               | 1980 | Wang Zhenggui                     | poor peasant         | 3              |                   |       | 30                            | 1279                   | 751                         | 2030               | 3000                        | 5030                       | 5030                         | 1110                        | 588.51                      |                                 | 1698.51               | 1698.51                              |                         | 226.35                         |                     |                         | 226.35                    | 198.7       |                        | 2.4                       |                             | 201.1                                 | 25.25                              |                      | 3                                       | 3                                         | 5                         | Wang Dezhong                            | 3                    |                  |                |                |
| 56               | 1980 | Wang Deshan                       | poor peasant         | 5              |                   |       | 50                            | 6350                   | 381                         | 6731               |                             | 6731                       |                              | 6731                        | 1850                        | 787.527                         |                       | 2637.527                             | 2637.527                |                                | 302.895             |                         |                           | 302.895     | 308.6                  |                           | 4                           |                                       | 312.6                              | -9.71                |                                         | 2                                         | 3                         | 5                                       | Wang Dezhong         | 3                |                |                |
| 57               | 1980 | Wang Deling                       | poor peasant         | 6              |                   |       | 60                            | 4409                   | 353                         | 4762               |                             | 4762                       |                              | 4762                        | 2220                        | 557.154                         |                       | 2777.154                             | 2777.154                |                                | 214.29              |                         |                           | 214.29      | 324.9                  |                           | 4.8                         |                                       | 329.7                              | -115.41              |                                         | 2                                         | 3                         | 5                                       | Wang Dezhong         | 3                |                |                |
| 60               | 1980 | Feng Zhaoyuan                     | poor peasant         | 1              |                   |       | 3                             | 1428                   | 0                           | 1428               |                             | 1428                       |                              | 1428                        | 111                         | 167.076                         |                       | 278.076                              | 278.076                 |                                | 64.26               |                         |                           | 64.26       | 32.5                   |                           | 0.8                         |                                       | 33.3                               | 30.96                |                                         | 3                                         | 3                         | 5                                       | Wang Dezhong         | 3                |                |                |
| 61               | 1980 | Ge Zhengxian                      | poor peasant         | 1              |                   |       | 10                            | 1613                   | 0                           | 1613               |                             | 1613                       |                              | 1613                        | 370                         | 188.721                         |                       | 558.721                              | 558.721                 |                                | 72.585              |                         |                           | 72.585      | 65.4                   |                           | 0.8                         |                                       | 66.2                               | 6.38                 |                                         | 3                                         | 3                         | 5                                       | Wang Dezhong         | 3                |                |                |
| 68               | 1980 | Ma Lianjun                        | middle-class peasant | 9              |                   |       | 88                            | 10409                  | 781                         | 11190              |                             | 11190                      |                              | 11190                       | 3256                        | 1309.23                         |                       | 4565.23                              | 4565.23                 |                                | 503.55              |                         |                           | 503.55      | 534.1                  |                           | 7.2                         |                                       | 541.3                              | -37.75               |                                         | 3                                         | 2                         | 5                                       | Wang Dezhong         | 3                |                |                |
| 69               | 1980 | Feng Xiaolou                      | landlord             | 1              |                   |       | 10                            | 2195                   | 3                           | 2198               |                             | 2198                       |                              | 2198                        | 370                         | 257.166                         |                       | 627.166                              | 627.166                 |                                | 98.91               |                         |                           | 98.91       | 73.4                   |                           | 0.8                         |                                       | 74.2                               | 24.71                |                                         | 3                                         | 1                         | 5                                       | Wang Dezhong         | 3                |                |                |
| 77               | 1980 | Chen Huixing                      | poor peasant         | 2              |                   |       | 20                            | 2888                   | 666                         | 3554               |                             | 3554                       |                              | 3554                        | 740                         | 415.818                         |                       | 1155.818                             | 1155.818                |                                | 159.93              |                         |                           | 159.93      | 135.3                  |                           | 1.6                         |                                       | 136.9                              | 23.03                |                                         | 2                                         | 3                         | 5                                       | Wang Dezhong         | 3                |                |                |
| 100              | 1980 | Deshan's mother                   | poor peasant         | 1              |                   |       | 10                            | 1400                   | 0                           | 1400               |                             | 1400                       |                              | 1400                        | 370                         | 163.8                           |                       | 533.8                                | 533.8                   |                                | 63                  |                         |                           | 63          | 62.5                   |                           | 0.8                         |                                       | 63.3                               | -0.30                |                                         | 2                                         | 3                         | 5                                       | Wang Dezhong         | 3                |                |                |
| 102              | 1980 | Xianxue's mother                  | poor peasant         | 1              |                   |       | 10                            | 193                    | 598                         | 791                |                             | 791                        |                              | 791                         | 370                         | 92.547                          |                       | 462.547                              | 462.547                 |                                | 35.595              |                         |                           | 35.595      | 54.2                   |                           | 0.8                         |                                       | 55                                 | -19.41               |                                         | 2                                         | 3                         | 5                                       | Wang Dezhong         | 3                |                |                |
| 21s              | 1980 | Feng Zhaoqian                     | poor peasant         | 5              |                   |       | 46                            | 5611                   | 304                         | 5915               | 500                         | 6415                       | 6415                         | 1702                        | 750.555                     |                                 | 2452.555              | 2452.555                             |                         | 288.675                        |                     |                         | 288.675                   | 286.9       |                        | 4                         |                             | 290.9                                 | -2.22                              |                      | 2                                       | 3                                         | 5                         | Wang Dezhong                            | 3                    |                  |                |                |
| 30s              | 1980 | Feng Zhaobin                      | poor peasant         | 3              |                   |       | 24                            | 4134                   | 401                         | 4535               |                             | 4535                       |                              | 4535                        | 888                         | 530.595                         |                       | 1418.595                             | 1418.595                |                                | 204.075             |                         |                           | 204.075     | 165.9                  |                           | 2.4                         |                                       | 168.3                              | 35.78                |                                         | 2                                         | 3                         | 5                                       | Wang Dezhong         | 3                |                |                |
| 31s              | 1980 | Feng Xianbao                      | poor peasant         | 4              |                   |       | 34                            | 3685                   | 639                         | 4324               |                             | 4324                       |                              | 4324                        | 1258                        | 505.908                         |                       | 1763.908                             | 1763.908                |                                | 194.58              |                         |                           | 194.58      | 206.4                  |                           | 3.2                         |                                       | 209.6                              | -15.02               |                                         | 2                                         | 3                         | 5                                       | Wang Dezhong         | 3                |                |                |
| 32s1             | 1980 | Wang Like                         | middle-class peasant | 3              |                   |       | 26                            | 3303                   | 600                         | 3903               |                             | 3903                       |                              | 3903                        | 962                         | 456.651                         |                       | 1418.651                             | 1418.651                |                                | 175.635             |                         |                           | 175.635     | 166                    |                           | 2.4                         |                                       | 168.4                              | 7.23                 |                                         | 2                                         | 2                         | 5                                       | Wang Dezhong         | 3                |                |                |
| 32s2             | 1980 | Wang Liju                         | middle-class peasant | 4              |                   |       | 40                            | 5960                   | 986                         | 6946               |                             | 6946                       |                              | 6946                        | 1480                        | 812.682                         |                       | 2292.682                             | 2292.682                |                                | 312.57              |                         |                           | 312.57      | 268.3                  |                           | 3.2                         |                                       | 271.5                              | 41.07                |                                         | 2                                         | 2                         | 5                                       | Wang Dezhong         | 3                |                |                |
| 47s1             | 1980 | Wang Dezhong                      | middle-class peasant | 4              |                   |       | 34                            | 3809                   | 332                         | 4141               |                             | 4141                       |                              | 4141                        | 1258                        | 484.497                         |                       | 1742.497                             | 1742.497                |                                | 186.345             |                         |                           | 186.345     | 203.8                  |                           | 3.2                         |                                       | 207                                | -20.66               |                                         | 1                                         | 2                         | 5                                       | Wang Dezhong         | 3                |                |                |
| 47s2             | 1980 | Wang Deqiang                      | middle-class peasant | 3              |                   |       | 24                            | 4382                   | 437                         | 4819               |                             | 4819                       |                              | 4819                        | 888                         | 563.823                         |                       | 1451.823                             | 1451.823                |                                | 216.855             |                         |                           | 216.855     | 169.9                  |                           | 2.4                         |                                       | 172.3                              | 44.56                |                                         | 2                                         | 2                         | 5                                       | Wang Dezhong         | 3                |                |                |
| 48s              | 1980 | Wang Jiaxun                       | poor peasant         | 3              |                   |       | 24                            | 1793                   | 255                         | 2048               |                             | 2048                       | 1500                         | 3548                        | 888                         | 415.116                         |                       | 1303.116                             | 1303.116                |                                | 92.16               |                         |                           | 92.16       | 152.5                  |                           | 2.4                         |                                       | 154.9                              | -62.74               |                                         | 2                                         | 3                         | 5                                       | Wang Dezhong         | 3                |                |                |

(cont.)

| Household number | Year | Name of the head of the household | Family class status  | Family members | Family characters | Labor | Number of standard population | Work points settlement |                             |                    |                             |                            | Grain distribution           |                             |                             |                                 |                                      | Firewood distribution | Work points income (Yuan) |                                |                     |                         | Deducted amount (Yuan)     |             |                        |                           |                                       | Distribution results (Yuan) | Distribution results (Yuan)        |                      |                                         |                                           | Guanxi                    |                                         |                      |                  |                |                |
|------------------|------|-----------------------------------|----------------------|----------------|-------------------|-------|-------------------------------|------------------------|-----------------------------|--------------------|-----------------------------|----------------------------|------------------------------|-----------------------------|-----------------------------|---------------------------------|--------------------------------------|-----------------------|---------------------------|--------------------------------|---------------------|-------------------------|----------------------------|-------------|------------------------|---------------------------|---------------------------------------|-----------------------------|------------------------------------|----------------------|-----------------------------------------|-------------------------------------------|---------------------------|-----------------------------------------|----------------------|------------------|----------------|----------------|
|                  |      |                                   |                      |                |                   |       |                               | Laboring work points   | Farmyard manure work points | Sum of work points | subsidy work points by cash | Sum of work points by cash | Subsidy work points by grain | Sum of work points by grain | Grain distribution: rations | Grain distribution: work points | Grain distribution: subsidized grain |                       | Grain distribution: sum   | Grain distribution: per capita | Income: work points | Income: welfare subsidy | Income: prepaied overdraft | Income: sum | Deducted amount: grain | Deducted amount: firewood | Deducted amount: other things in kind |                             | Deducted amount: withdraw advances | Deducted amount: sum | Distribution results: personal solution | Distribution results: collective solution | Distribution results: sum | Interpersonal relationship with leaders | Family class status2 | Number of leader | Name of leader | Term of office |
|                  |      |                                   |                      |                |                   |       |                               |                        |                             |                    |                             |                            |                              |                             |                             |                                 |                                      |                       |                           |                                |                     |                         |                            |             |                        |                           |                                       |                             |                                    |                      |                                         |                                           |                           |                                         |                      |                  |                |                |
| 2                | 1981 | Wang Xinming                      | middle-class peasant | 7              | worker            |       | 70                            | 6184                   | 497                         | 6681               |                             | 6681                       | 2500                         | 9181                        | 2828                        | 1505.684                        |                                      | 4333.684              |                           | 457.6485                       |                     |                         | 457.6485                   | 520.1       |                        | 10.5                      |                                       | 530.6                       | -72.95                             |                      | 2                                       | 2                                         | 5                         | Wang Dezhong                            | 3                    |                  |                |                |
| 3                | 1981 | Feng Kaiying                      | poor peasant         | 7              |                   | 62    | 3630                          | 639                    | 4269                        |                    | 4269                        |                            | 4269                         | 2504.8                      |                             | 700.116                         |                                      | 3204.916              |                           | 292.4265                       |                     |                         | 292.4265                   | 384.6       |                        | 10.5                      |                                       | 395.1                       | -102.67                            |                      | 3                                       | 3                                         | 5                         | Wang Dezhong                            | 3                    |                  |                |                |
| 4                | 1981 | Wang Zuopeng                      | poor peasant         | 2              |                   | 20    | 3250                          | 143                    | 3393                        |                    | 3393                        |                            | 3393                         | 808                         |                             | 556.452                         |                                      | 1364.452              |                           | 232.4205                       |                     |                         | 232.4205                   | 163.7       |                        | 3                         |                                       | 166.7                       | 65.72                              |                      | 3                                       | 3                                         | 5                         | Wang Dezhong                            | 3                    |                  |                |                |
| 5                | 1981 | Wang Zuoliang                     | poor peasant         | 5              |                   | 50    | 3786                          | 785                    | 4571                        |                    | 4571                        |                            | 4571                         | 2020                        |                             | 749.644                         |                                      | 2769.644              |                           | 313.1135                       |                     |                         | 313.1135                   | 332.4       |                        | 7.5                       |                                       | 339.9                       | -26.79                             |                      | 2                                       | 3                                         | 5                         | Wang Dezhong                            | 3                    |                  |                |                |
| 6                | 1981 | Wang Tingmei                      | poor peasant         | 8              |                   | 80    | 6067                          | 591                    | 6658                        |                    | 6658                        |                            | 6658                         | 3232                        |                             | 1091.912                        |                                      | 4323.912              |                           | 456.073                        |                     |                         | 456.073                    | 518.9       |                        | 12                        |                                       | 530.9                       | -74.83                             |                      | 2                                       | 3                                         | 5                         | Wang Dezhong                            | 3                    |                  |                |                |
| 7                | 1981 | Wang Tingxi                       | poor peasant         | 4              |                   | 40    | 1825                          | 237                    | 2062                        |                    | 2062                        | 2200                       | 4262                         | 1616                        |                             | 698.968                         |                                      | 2314.968              |                           | 141.247                        |                     |                         | 141.247                    | 277.8       |                        | 6                         |                                       | 283.8                       | -142.55                            |                      | 2                                       | 3                                         | 5                         | Wang Dezhong                            | 3                    |                  |                |                |
| 9                | 1981 | Wang Tingzhi                      | poor peasant         | 1              |                   | 10    | 250                           | 938                    | 1188                        |                    | 1188                        |                            | 1188                         | 404                         |                             | 194.832                         |                                      | 598.832               |                           | 81.378                         |                     |                         | 81.378                     | 71.9        |                        | 1.5                       |                                       | 73.4                        | 7.98                               |                      | 3                                       | 3                                         | 5                         | Wang Dezhong                            | 3                    |                  |                |                |
| 10               | 1981 | Wang Zuoxing                      | poor peasant         | 5              |                   | 46    | 2563                          | 100                    | 2663                        |                    | 2663                        |                            | 2663                         | 1858.4                      |                             | 436.732                         |                                      | 2295.132              |                           | 182.4155                       |                     |                         | 182.4155                   | 275.4       |                        | 7.5                       |                                       | 282.9                       | -100.48                            |                      | 2                                       | 3                                         | 5                         | Wang Dezhong                            | 3                    |                  |                |                |
| 11               | 1981 | Wang Zuoqi                        | poor peasant         | 5              |                   | 50    | 3675                          | 632                    | 4307                        |                    | 4307                        |                            | 4307                         | 2020                        |                             | 706.348                         |                                      | 2726.348              |                           | 295.0295                       |                     |                         | 295.0295                   | 327.1       |                        | 7.5                       |                                       | 334.6                       | -39.57                             |                      | 2                                       | 3                                         | 5                         | Wang Dezhong                            | 3                    |                  |                |                |
| 12               | 1981 | Kaiying's mother                  | poor peasant         | 1              |                   | 10    | 1000                          | 0                      | 1000                        |                    | 1000                        |                            | 1000                         | 404                         |                             | 164                             |                                      | 568                   |                           | 68.5                           |                     |                         | 68.5                       | 68.2        |                        | 1.5                       |                                       | 69.7                        | -1.20                              |                      | 2                                       | 3                                         | 5                         | Wang Dezhong                            | 3                    |                  |                |                |
| 14               | 1981 | Feng Kailing                      | landlord             | 2              | 20                | 3413  | 0                             | 3413                   |                             | 3413               |                             | 3413                       | 808                          |                             | 559.732                     |                                 | 1367.732                             |                       | 233.7905                  |                                |                     | 233.7905                | 164.2                      |             | 3                      |                           | 167.2                                 | 66.59                       |                                    | 3                    | 1                                       | 5                                         | Wang Dezhong              | 3                                       |                      |                  |                |                |
| 15               | 1981 | Feng Huazhong                     | landlord             | 3              | 30                | 1965  | 363                           | 2328                   |                             | 2328               |                             | 2328                       | 1212                         |                             | 381.792                     |                                 | 1593.792                             |                       | 159.468                   |                                |                     | 159.468                 | 191.3                      |             | 4.5                    |                           | 195.8                                 | -36.33                      |                                    | 3                    | 1                                       | 5                                         | Wang Dezhong              | 3                                       |                      |                  |                |                |
| 16               | 1981 | Wang Sichun                       | poor peasant         | 3              | 20                | 810   | 0                             | 810                    |                             | 810                |                             | 810                        | 808                          |                             | 132.84                      |                                 | 940.84                               |                       | 55.485                    |                                |                     | 55.485                  | 112.9                      |             | 4.5                    |                           | 117.4                                 | -61.92                      |                                    | 3                    | 3                                       | 5                                         | Wang Dezhong              | 3                                       |                      |                  |                |                |
| 17               | 1981 | Chen Xuezhong                     | poor peasant         | 2              | 20                | 2951  | 185                           | 3136                   |                             | 3136               |                             | 3136                       | 808                          |                             | 514.304                     |                                 | 1322.304                             |                       | 214.816                   |                                |                     | 214.816                 | 158.6                      |             | 3                      |                           | 161.6                                 | 53.22                       |                                    | 2                    | 3                                       | 5                                         | Wang Dezhong              | 3                                       |                      |                  |                |                |
| 18               | 1981 | Feng Baojin                       | poor peasant         | 2              | 20                | 1509  | 249                           | 1758                   |                             | 1758               |                             | 1758                       | 808                          |                             | 288.312                     |                                 | 1096.312                             |                       | 120.423                   |                                |                     | 120.423                 | 131.5                      |             | 3                      |                           | 134.5                                 | -14.08                      |                                    | 2                    | 3                                       | 5                                         | Wang Dezhong              | 3                                       |                      |                  |                |                |
| 19               | 1981 | Feng Xianzhong                    | poor peasant         | 4              | 38                | 3073  | 265                           | 3338                   |                             | 3338               |                             | 3338                       | 1535.2                       |                             | 547.432                     |                                 | 2082.632                             |                       | 228.653                   |                                |                     | 228.653                 | 249.8                      |             | 6                      |                           | 255.8                                 | -27.15                      |                                    | 2                    | 3                                       | 5                                         | Wang Dezhong              | 3                                       |                      |                  |                |                |
| 20               | 1981 | Feng Kaiyuan                      | poor peasant         | 7              | 70                | 7119  | 994                           | 8113                   |                             | 8113               |                             | 8113                       | 2828                         |                             | 1330.532                    |                                 | 4158.532                             |                       | 555.7405                  |                                |                     | 555.7405                | 499.1                      |             | 10.5                   |                           | 509.6                                 | 46.14                       |                                    | 3                    | 3                                       | 5                                         | Wang Dezhong              | 3                                       |                      |                  |                |                |
| 21               | 1981 | Feng Kaiwu                        | poor peasant         | 5              | 50                | 3812  | 104                           | 3916                   |                             | 3916               |                             | 3916                       | 2020                         |                             | 642.224                     |                                 | 2662.224                             |                       | 268.246                   |                                |                     | 268.246                 | 319.4                      |             | 7.5                    |                           | 326.9                                 | -58.65                      |                                    | 3                    | 3                                       | 5                                         | Wang Dezhong              | 3                                       |                      |                  |                |                |
| 22               | 1981 | Feng Kaiwen                       | poor peasant         | 6              | 60                | 7478  | 216                           | 7694                   |                             | 7694               |                             | 7694                       | 2424                         |                             | 1261.816                    |                                 | 3685.816                             |                       | 527.039                   |                                |                     | 527.039                 | 442.3                      |             | 9                      |                           | 451.3                                 | 75.74                       |                                    | 2                    | 3                                       | 5                                         | Wang Dezhong              | 3                                       |                      |                  |                |                |
| 23               | 1981 | Kou Huaisheng                     | poor peasant         | 8              | 80                | 10051 | 468                           | 10519                  |                             | 10519              |                             | 10519                      | 3232                         |                             | 1725.116                    |                                 | 4957.116                             |                       | 720.5515                  |                                |                     | 720.5515                | 594.8                      |             | 12                     |                           | 606.8                                 | 113.75                      |                                    | 2                    | 3                                       | 5                                         | Wang Dezhong              | 3                                       |                      |                  |                |                |
| 24               | 1981 | Anming's mother                   | landlord             | 1              | 10                | 148   | 7                             | 155                    |                             | 155                | 800                         | 955                        | 404                          |                             | 156.62                      |                                 | 560.62                               |                       | 10.6175                   |                                | 58.2                | 68.8175                 | 67.3                       |             | 1.5                    |                           | 68.8                                  | 0.02                        |                                    | 2                    | 1                                       | 5                                         | Wang Dezhong              | 3                                       |                      |                  |                |                |
| 25               | 1981 | Xiuying's mother                  | poor peasant         | 1              | 10                | 250   | 156                           | 406                    |                             | 406                | 600                         | 1006                       | 404                          |                             | 164.984                     |                                 | 568.984                              |                       | 27.811                    |                                | 42                  | 69.811                  | 68.3                       |             | 1.5                    |                           | 69.8                                  | 0.01                        |                                    | 3                    | 3                                       | 5                                         | Wang Dezhong              | 3                                       |                      |                  |                |                |
| 26               | 1981 | Feng Zhaobu                       | middle-class peasant | 3              | worker            |       | 30                            | 0                      | 0                           | 0                  |                             | 0                          | 2500                         | 2500                        | 1212                        | 410                             |                                      | 1622                  |                           | 0                              |                     |                         | 0                          | 194.6       |                        | 4.5                       |                                       | 199.1                       | -199.10                            |                      | 2                                       | 2                                         | 5                         | Wang Dezhong                            | 3                    |                  |                |                |
| 27               | 1981 | Feng Zhaohuan                     | middle-class peasant | 6              |                   |       | 60                            | 3465                   | 281                         | 3746               |                             | 3746                       |                              | 3746                        | 2424                        | 614.344                         |                                      | 3038.344              |                           | 256.601                        |                     |                         | 256.601                    | 364.6       |                        | 9                         |                                       | 373.6                       | -117.00                            |                      | 3                                       | 2                                         | 5                         | Wang Dezhong                            | 3                    |                  |                |                |
| 28               | 1981 | Zhaohuan's mother                 | middle-class peasant | 1              |                   |       | 10                            | 600                    | 0                           | 600                |                             | 600                        | 600                          | 1200                        | 404                         | 196.8                           |                                      | 600.8                 |                           | 41.1                           |                     |                         | 41.1                       | 72.1        |                        | 1.5                       |                                       | 73.6                        | -32.50                             |                      | 3                                       | 2                                         | 5                         | Wang Dezhong                            | 3                    |                  |                |                |
| 29               | 1981 | Feng Kaijun                       | poor peasant         | 7              |                   |       | 70                            | 7213                   | 521                         | 7734               |                             | 7734                       |                              | 7734                        | 2828                        | 1268.376                        |                                      | 4096.376              |                           | 529.779                        |                     |                         | 529.779                    | 491.5       |                        | 10.5                      |                                       | 502                         | 27.78                              |                      | 2                                       | 3                                         | 5                         | Wang Dezhong                            | 3                    |                  |                |                |
| 30               | 1981 | Feng Kaizheng                     | poor peasant         | 8              |                   |       | 80                            | 11010                  | 324                         | 11334              |                             | 11334                      |                              | 11334                       | 3232                        | 1858.776                        |                                      | 5090.776              |                           | 776.379                        |                     |                         | 776.379                    | 610.9       |                        | 12                        |                                       | 622.9                       | 153.48                             |                      | 3                                       | 3                                         | 5                         | Wang Dezhong                            | 3                    |                  |                |                |

(cont.)

| Household number | Year | Name of the head of the household | Family class status  | Family members | Family characters | Labor | Number of standard population | Work points settlement |                             |                    |                             |                            | Grain distribution           |                             |                             |                                 |                                      | Firewood distribution | Work points income (Yuan) |                                |                     |                         | Deducted amount (Yuan)     |             |                        |                           |                                       | Distribution results (Yuan) | Distribution results (Yuan)        |                      |                                         | Guanxi                                    |                           |                                         |                      |                  |
|------------------|------|-----------------------------------|----------------------|----------------|-------------------|-------|-------------------------------|------------------------|-----------------------------|--------------------|-----------------------------|----------------------------|------------------------------|-----------------------------|-----------------------------|---------------------------------|--------------------------------------|-----------------------|---------------------------|--------------------------------|---------------------|-------------------------|----------------------------|-------------|------------------------|---------------------------|---------------------------------------|-----------------------------|------------------------------------|----------------------|-----------------------------------------|-------------------------------------------|---------------------------|-----------------------------------------|----------------------|------------------|
|                  |      |                                   |                      |                |                   |       |                               | Laboring work points   | Farmyard manure work points | Sum of work points | subsidy work points by cash | Sum of work points by cash | Subsidy work points by grain | Sum of work points by grain | Grain distribution: rations | Grain distribution: work points | Grain distribution: subsidized grain |                       | Grain distribution: sum   | Grain distribution: per capita | Income: work points | Income: welfare subsidy | Income: prepaied overdraft | Income: sum | Deducted amount: grain | Deducted amount: firewood | Deducted amount: other things in kind |                             | Deducted amount: withdraw advances | Deducted amount: sum | Distribution results: personal solution | Distribution results: collective solution | Distribution results: sum | Interpersonal relationship with leaders | Family class status2 | Number of leader |
| 31               | 1981 | Feng Zhaoxin                      | poor peasant         | 4              |                   |       | 40                            | 2428                   | 698                         | 3126               |                             | 3126                       |                              | 3126                        | 1616                        | 512.664                         |                                      | 2128.664              |                           | 214.131                        |                     |                         | 214.131                    | 255.5       | 6                      |                           | 261.5                                 | -47.37                      |                                    |                      | 3                                       | 3                                         | 5                         | Wang Dezhong                            | 3                    |                  |
| 32               | 1981 | Wang Xiangyun                     | middle-class peasant | 1              |                   |       | 10                            | 250                    | 761                         | 1011               |                             | 1011                       |                              | 1011                        | 404                         | 165.804                         |                                      | 569.804               |                           | 69.2535                        |                     |                         | 69.2535                    | 68.4        | 1.5                    |                           | 69.9                                  | -0.65                       |                                    |                      | 3                                       | 2                                         | 5                         | Wang Dezhong                            | 3                    |                  |
| 33               | 1981 | Wang Xuewen                       | middle-class peasant | 3              |                   |       | 30                            | 2973                   | 205                         | 3178               |                             | 3178                       |                              | 3178                        | 1212                        | 521.192                         |                                      | 1733.192              |                           | 217.693                        |                     |                         | 217.693                    | 208.2       | 4.5                    |                           | 212.7                                 | 4.99                        |                                    |                      | 3                                       | 2                                         | 5                         | Wang Dezhong                            | 3                    |                  |
| 34               | 1981 | Feng Xianmin                      | middle-class peasant | 3              |                   |       | 30                            | 3795                   | 230                         | 4025               |                             | 4025                       |                              | 4025                        | 1212                        | 660.1                           |                                      | 1872.1                |                           | 275.7125                       |                     |                         | 275.7125                   | 224.6       | 4.5                    |                           | 229.1                                 | 46.61                       |                                    |                      | 2                                       | 2                                         | 5                         | Wang Dezhong                            | 3                    |                  |
| 35               | 1981 | Feng Xianhua                      | middle-class peasant | 3.5            |                   |       | 29                            | 2407                   | 731                         | 3138               |                             | 3138                       |                              | 3138                        | 1171.6                      | 514.632                         |                                      | 1686.232              |                           | 214.953                        |                     |                         | 214.953                    | 202.4       | 5.25                   |                           | 207.65                                | 7.30                        |                                    |                      | 2                                       | 2                                         | 5                         | Wang Dezhong                            | 3                    |                  |
| 36               | 1981 | Feng Xiaoxi                       | middle-class peasant | 6              |                   |       | 54                            | 5604                   | 373                         | 5977               |                             | 5977                       |                              | 5977                        | 2181.6                      | 980.228                         |                                      | 3161.828              |                           | 409.4245                       |                     |                         | 409.4245                   | 379.4       | 9                      |                           | 388.4                                 | 21.02                       |                                    |                      | 3                                       | 2                                         | 5                         | Wang Dezhong                            | 3                    |                  |
| 37               | 1981 | Feng Xiangui                      | middle-class peasant | 7              |                   |       | 70                            | 6594                   | 648                         | 7242               |                             | 7242                       |                              | 7242                        | 2828                        | 1187.688                        |                                      | 4015.688              |                           | 496.077                        |                     |                         | 496.077                    | 481.9       | 10.5                   |                           | 492.4                                 | 3.68                        |                                    |                      | 2                                       | 2                                         | 5                         | Wang Dezhong                            | 3                    |                  |
| 38               | 1981 | Feng Xianzhen                     | middle-class peasant | 7              |                   |       | 64                            | 5143                   | 516                         | 5659               |                             | 5659                       |                              | 5659                        | 2585.6                      | 928.076                         |                                      | 3513.676              |                           | 387.6415                       |                     |                         | 387.6415                   | 421.6       | 10.5                   |                           | 432.1                                 | -44.46                      |                                    |                      | 2                                       | 2                                         | 5                         | Wang Dezhong                            | 3                    |                  |
| 39               | 1981 | Feng Xianxue                      | middle-class peasant | 5.5            |                   |       | 53                            | 5627                   | 726                         | 6353               | 600                         | 6953                       |                              | 6953                        | 2141.2                      | 1140.292                        |                                      | 3281.492              |                           | 476.2805                       |                     |                         | 476.2805                   | 393.7       | 8.25                   |                           | 401.95                                | 74.33                       |                                    |                      | 1                                       | 2                                         | 5                         | Wang Dezhong                            | 3                    |                  |
| 40               | 1981 | Wang Tingpin                      | poor peasant         | 2              |                   |       | 20                            | 2592                   | 656                         | 3248               |                             | 3248                       |                              | 3248                        | 808                         | 532.672                         |                                      | 1340.672              |                           | 222.488                        |                     |                         | 222.488                    | 160.8       | 3                      |                           | 163.8                                 | 58.69                       |                                    |                      | 1                                       | 3                                         | 5                         | Wang Dezhong                            | 3                    |                  |
| 41               | 1981 | Wang Zhengfen                     | middle-class peasant | 3              |                   |       | 30                            | 2037                   | 136                         | 2173               |                             | 2173                       |                              | 2173                        | 1212                        | 356.372                         |                                      | 1568.372              |                           | 148.8505                       |                     |                         | 148.8505                   | 188.2       | 4.5                    |                           | 192.7                                 | -43.85                      |                                    |                      | 1                                       | 2                                         | 5                         | Wang Dezhong                            | 3                    |                  |
| 42               | 1981 | Wu Zongxiu                        | middle-class peasant | 1              |                   |       | 10                            | 489                    | 627                         | 1116               |                             | 1116                       |                              | 1116                        | 404                         | 183.024                         |                                      | 587.024               |                           | 76.446                         |                     |                         | 76.446                     | 70.4        | 1.5                    |                           | 71.9                                  | 4.55                        |                                    |                      | 3                                       | 2                                         | 5                         | Wang Dezhong                            | 3                    |                  |
| 43               | 1981 | Wang Depo                         | poor peasant         | 5              | soldier           |       | 50                            | 3685                   | 336                         | 4021               | 1500                        | 5521                       |                              | 5521                        | 2020                        | 905.444                         |                                      | 2925.444              |                           | 378.1885                       |                     |                         | 378.1885                   | 351         | 7.5                    |                           | 358.5                                 | 19.69                       |                                    |                      | 1                                       | 3                                         | 5                         | Wang Dezhong                            | 3                    |                  |
| 44               | 1981 | Wang Dexue                        | poor peasant         | 2              |                   |       | 20                            | 2917                   | 0                           | 2917               |                             | 2917                       |                              | 2917                        | 808                         | 478.388                         |                                      | 1286.388              |                           | 199.8145                       |                     |                         | 199.8145                   | 154.3       | 3                      |                           | 157.3                                 | 42.51                       |                                    |                      | 1                                       | 3                                         | 5                         | Wang Dezhong                            | 3                    |                  |
| 45               | 1981 | Wang Dekuan                       | poor peasant         | 3              |                   |       | 30                            | 3904                   | 317                         | 4221               |                             | 4221                       |                              | 4221                        | 1212                        | 692.244                         |                                      | 1904.244              |                           | 289.1385                       |                     |                         | 289.1385                   | 228.5       | 4.5                    |                           | 233                                   | 56.14                       |                                    |                      | 1                                       | 3                                         | 5                         | Wang Dezhong                            | 3                    |                  |
| 46               | 1981 | Wang Tingzhen                     | poor peasant         | 7              | handicapped       |       | 70                            | 3279                   | 267                         | 3546               | 3800                        | 7346                       |                              | 7346                        | 2828                        | 1204.744                        |                                      | 4032.744              |                           | 503.201                        |                     |                         | 503.201                    | 484         | 10.5                   |                           | 494.5                                 | 8.70                        |                                    |                      | 1                                       | 3                                         | 5                         | Wang Dezhong                            | 3                    |                  |
| 47               | 1981 | Wang Tingjian                     | poor peasant         | 3              |                   |       | 30                            | 3749                   | 172                         | 3921               |                             | 3921                       |                              | 3921                        | 1212                        | 643.044                         |                                      | 1855.044              |                           | 268.5885                       |                     |                         | 268.5885                   | 222.6       | 4.5                    |                           | 227.1                                 | 41.49                       |                                    |                      | 1                                       | 3                                         | 5                         | Wang Dezhong                            | 3                    |                  |
| 48               | 1981 | Wang Zhengcai                     | poor peasant         | 5              |                   |       | 53                            | 4839                   | 665                         | 5504               |                             | 5504                       |                              | 5504                        | 2141.2                      | 902.656                         |                                      | 3043.856              |                           | 377.024                        |                     |                         | 377.024                    | 365.2       | 7.5                    |                           | 372.7                                 | 4.32                        |                                    |                      | 2                                       | 3                                         | 5                         | Wang Dezhong                            | 3                    |                  |
| 49               | 1981 | Wang Zhengxuan                    | poor peasant         | 7              |                   |       | 64                            | 6967                   | 234                         | 7201               |                             | 7201                       |                              | 7201                        | 2585.6                      | 1180.964                        |                                      | 3766.564              |                           | 493.2685                       |                     |                         | 493.2685                   | 452         | 10.5                   |                           | 462.5                                 | 30.77                       |                                    |                      | 2                                       | 3                                         | 5                         | Wang Dezhong                            | 3                    |                  |
| 50               | 1981 | Chao Shengqi                      | poor peasant         | 2              | worker            |       | 18                            | 745                    | 927                         | 1672               |                             | 1672                       | 500                          | 2172                        | 727.2                       | 356.208                         |                                      | 1083.408              |                           | 114.532                        |                     |                         | 114.532                    | 130         | 3                      |                           | 133                                   | -18.47                      |                                    |                      | 2                                       | 3                                         | 5                         | Wang Dezhong                            | 3                    |                  |
| 51               | 1981 | Chao Shengyu                      | poor peasant         | 3              | worker            |       | 26                            | 1460                   | 171                         | 1631               |                             | 1631                       | 1000                         | 2631                        | 1050.4                      | 431.484                         |                                      | 1481.884              |                           | 111.7235                       |                     |                         | 111.7235                   | 177.7       | 4.5                    |                           | 182.2                                 | -70.48                      |                                    |                      | 2                                       | 3                                         | 5                         | Wang Dezhong                            | 3                    |                  |

(cont.)

| Household number | Year | Name of the head of the household | Family class status  | Family members | Family characters | Labor | Number of standard population | Work points settlement |                             |                    |                     |                    | Grain distribution  |                    |                             |                                 |                                      | Firewood distribution | Work points income (Yuan) |                                |                     |                         | Deducted amount (Yuan)     |             |                        |                           |                                       | Distribution results (Yuan) | Distribution results (Yuan)        |                      |                                         | Guanxi                                    |                           |                                         |                                  |                  |                |                |
|------------------|------|-----------------------------------|----------------------|----------------|-------------------|-------|-------------------------------|------------------------|-----------------------------|--------------------|---------------------|--------------------|---------------------|--------------------|-----------------------------|---------------------------------|--------------------------------------|-----------------------|---------------------------|--------------------------------|---------------------|-------------------------|----------------------------|-------------|------------------------|---------------------------|---------------------------------------|-----------------------------|------------------------------------|----------------------|-----------------------------------------|-------------------------------------------|---------------------------|-----------------------------------------|----------------------------------|------------------|----------------|----------------|
|                  |      |                                   |                      |                |                   |       |                               | Laboring work points   | Farmyard manure work points | Sum of work points | subsidy work points | Sum of work points | Subsidy work points | Sum of work points | Grain distribution: rations | Grain distribution: work points | Grain distribution: subsidized grain |                       | Grain distribution: sum   | Grain distribution: per capita | Income: work points | Income: welfare subsidy | Income: prepaied overdraft | Income: sum | Deducted amount: grain | Deducted amount: firewood | Deducted amount: other things in kind |                             | Deducted amount: withdraw advances | Deducted amount: sum | Distribution results: personal solution | Distribution results: collective solution | Distribution results: sum | Interpersonal relationship with leaders | Family class status <sup>2</sup> | Number of leader | Name of leader | Term of office |
|                  |      |                                   |                      |                |                   |       |                               |                        |                             |                    |                     |                    |                     |                    |                             |                                 |                                      |                       |                           |                                |                     |                         |                            |             |                        |                           |                                       |                             |                                    |                      |                                         |                                           |                           |                                         |                                  |                  |                |                |
| 52               | 1981 | Wang Zhengyan                     | poor peasant         | 2              |                   |       | 20                            | 2846                   | 253                         | 3099               |                     | 3099               |                     | 3099               | 808                         | 508.236                         |                                      | 1316.236              |                           | 212.2815                       |                     |                         |                            | 212.2815    | 157.9                  |                           | 3                                     |                             | 160.9                              | 51.38                |                                         |                                           | 3                         | 3                                       | 5                                | Wang Dezhong     | 3              |                |
| 54               | 1981 | Wang Zhenggui                     | poor peasant         | 4              |                   |       | 38                            | 2180                   | 143                         | 2323               | 1700                | 4023               |                     | 4023               | 1535.2                      | 659.772                         |                                      | 2194.972              |                           | 275.5755                       |                     |                         |                            | 275.5755    | 263.4                  |                           | 6                                     |                             | 269.4                              | 6.18                 |                                         |                                           | 3                         | 3                                       | 5                                | Wang Dezhong     | 3              |                |
| 56               | 1981 | Wang Deshan                       | poor peasant         | 5.5            |                   |       | 55                            | 5519                   | 136                         | 5655               |                     | 5655               |                     | 5655               | 2222                        | 927.42                          |                                      | 3149.42               |                           | 387.3675                       |                     |                         |                            | 387.3675    | 377.9                  |                           | 8.25                                  |                             | 386.15                             | 1.22                 |                                         |                                           | 2                         | 3                                       | 5                                | Wang Dezhong     | 3              |                |
| 57               | 1981 | Wang Deling                       | poor peasant         | 6.5            |                   |       | 65                            | 5804                   | 168                         | 5972               |                     | 5972               |                     | 5972               | 2626                        | 979.408                         |                                      | 3605.408              |                           | 409.082                        |                     |                         |                            | 409.082     | 432.6                  |                           | 9.75                                  |                             | 442.35                             | -33.27               |                                         |                                           | 2                         | 3                                       | 5                                | Wang Dezhong     | 3              |                |
| 61               | 1981 | Ge Zhengxian                      | poor peasant         | 1              |                   |       | 10                            | 1549                   | 0                           | 1549               |                     | 1549               |                     | 1549               | 404                         | 254.036                         |                                      | 658.036               |                           | 106.1065                       |                     |                         |                            | 106.1065    | 79.2                   |                           | 1.5                                   |                             | 80.7                               | 25.41                |                                         |                                           | 3                         | 3                                       | 5                                | Wang Dezhong     | 3              |                |
| 68               | 1981 | Ma Lianjun                        | middle-class peasant | 10             |                   |       | 98                            | 9018                   | 863                         | 9881               |                     | 9881               |                     | 9881               | 3959.2                      | 1620.484                        |                                      | 5579.684              |                           | 676.8485                       |                     |                         |                            | 676.8485    | 669.6                  |                           | 15                                    |                             | 684.6                              | -7.75                |                                         |                                           | 3                         | 2                                       | 5                                | Wang Dezhong     | 3              |                |
| 69               | 1981 | Feng Xiaolou                      | landlord             | 1              |                   |       | 10                            | 1940                   | 0                           | 1940               |                     | 1940               |                     | 1940               | 404                         | 318.16                          |                                      | 722.16                |                           | 132.89                         |                     |                         |                            | 132.89      | 86.6                   |                           | 1.5                                   |                             | 88.1                               | 44.79                |                                         |                                           | 3                         | 1                                       | 5                                | Wang Dezhong     | 3              |                |
| 96               | 1981 | Chen Huilan                       | poor peasant         | 3              |                   |       | 30                            | 624                    | 447                         | 1071               |                     | 1071               |                     | 1071               | 1212                        | 175.644                         |                                      | 1387.644              |                           | 73.3635                        |                     |                         |                            | 73.3635     | 166.6                  |                           | 4.5                                   |                             | 171.1                              | -97.74               |                                         |                                           | 2                         | 3                                       | 5                                | Wang Dezhong     | 3              |                |
| 21s              | 1981 | Feng Zhaoqian                     | poor peasant         | 5              |                   |       | 48                            | 5933                   | 34                          | 5967               | 500                 | 6467               |                     | 6467               | 1939.2                      | 1060.588                        |                                      | 2999.788              |                           | 442.9895                       |                     |                         |                            | 442.9895    | 359.9                  |                           | 7.5                                   |                             | 367.4                              | 75.59                |                                         |                                           | 2                         | 3                                       | 5                                | Wang Dezhong     | 3              |                |
| 30s              | 1981 | Feng Zhaobin                      | poor peasant         | 3              |                   |       | 26                            | 3529                   | 6                           | 3535               |                     | 3535               |                     | 3535               | 1050.4                      | 579.74                          |                                      | 1630.14               |                           | 242.1475                       |                     |                         |                            | 242.1475    | 195.6                  |                           | 4.5                                   |                             | 200.1                              | 42.05                |                                         |                                           | 2                         | 3                                       | 5                                | Wang Dezhong     | 3              |                |
| 31s              | 1981 | Feng Xianbao                      | poor peasant         | 4              |                   |       | 34                            | 2641                   | 199                         | 2840               |                     | 2840               |                     | 2840               | 1373.6                      | 465.76                          |                                      | 1839.36               |                           | 194.54                         |                     |                         |                            | 194.54      | 220.8                  |                           | 6                                     |                             | 226.8                              | -32.26               |                                         |                                           | 2                         | 3                                       | 5                                | Wang Dezhong     | 3              |                |
| 32s1             | 1981 | Wang Like                         | middle-class peasant | 3              |                   |       | 26                            | 1933                   | 235                         | 2168               |                     | 2168               |                     | 2168               | 1050.4                      | 355.552                         |                                      | 1405.952              |                           | 148.508                        |                     |                         |                            | 148.508     | 168.8                  |                           | 4.5                                   |                             | 173.3                              | -24.79               |                                         |                                           | 2                         | 2                                       | 5                                | Wang Dezhong     | 3              |                |
| 32s2             | 1981 | Wang Liju                         | middle-class peasant | 4              |                   |       | 40                            | 3642                   | 462                         | 4104               |                     | 4104               |                     | 4104               | 1616                        | 673.056                         |                                      | 2289.056              |                           | 281.124                        |                     |                         |                            | 281.124     | 274.7                  |                           | 6                                     |                             | 280.7                              | 0.42                 |                                         |                                           | 2                         | 2                                       | 5                                | Wang Dezhong     | 3              |                |
| 47s1             | 1981 | Wang Dezhong                      | middle-class peasant | 4              |                   |       | 36                            | 3407                   | 200                         | 3607               |                     | 3607               |                     | 3607               | 1454.4                      | 591.548                         |                                      | 2045.948              |                           | 247.0795                       |                     |                         |                            | 247.0795    | 245.6                  |                           | 6                                     |                             | 251.6                              | -4.52                |                                         |                                           | 1                         | 2                                       | 5                                | Wang Dezhong     | 3              |                |
| 47s2             | 1981 | Wang Deqiang                      | middle-class peasant | 3              |                   |       | 24                            | 3545                   | 157                         | 3702               |                     | 3702               |                     | 3702               | 969.6                       | 607.128                         |                                      | 1576.728              |                           | 253.587                        |                     |                         |                            | 253.587     | 189.2                  |                           | 4.5                                   |                             | 193.7                              | 59.89                |                                         |                                           | 2                         | 2                                       | 5                                | Wang Dezhong     | 3              |                |
| 48s              | 1981 | Wang Jiaxun                       | poor peasant         | 3              | worker            |       | 24                            | 1390                   | 255                         | 1645               |                     | 1645               | 1000                | 2645               | 969.6                       | 433.78                          |                                      | 1403.38               |                           | 112.6825                       |                     |                         |                            | 112.6825    | 168.5                  |                           | 4.5                                   |                             | 173                                | -60.32               |                                         |                                           | 2                         | 3                                       | 5                                | Wang Dezhong     | 3              |                |
